# Supplementary material for: Tlr7-biallelism defines a hyperfunctional state of female B lymphocytes
Source: Research Square preprint supplement (doi:10.21203/rs.3.rs-8306714/v1), 2025-12-10
Supplement: Supplementary file 1 [file 72cf64576f6b459c8861c5e7.xlsx]

## Sheet: Sheet1
Supplementary Table 2: Differentially accessible regions (DARs) between Tlr7 mono and biallelic CD19+ splenic IgD+ B cells
chr	start	end	region_name	Pval_YFP_DAR	FDR_YFP_DAR	cluster
chr11	33938976	33939376	DAR_1	7.93885452599449e-27	7.48689553782962e-22	4
chr11	52299650	52300050	DAR_2	1.83480085423107e-26	8.65172820799849e-22	3
chr5	134269737	134270137	DAR_3	3.76207487341887e-25	1.18263331695838e-20	4
chr5	134282613	134283013	DAR_4	1.81475104631731e-23	4.06452713676743e-19	4
chr10	116913811	116914211	DAR_5	2.15494456231639e-23	4.06452713676743e-19	4
chr2	104172659	104173059	DAR_6	8.34810800515181e-22	1.31214170273642e-17	4
chr12	73603610	73604010	DAR_7	1.55170806116436e-21	2.09052760177467e-17	4
chr9	100460211	100460611	DAR_8	1.94020404126087e-21	2.28718528148986e-17	4
chr2	166701464	166701864	DAR_9	2.23391518093734e-21	2.34082043298509e-17	4
chr17	28612607	28613007	DAR_10	1.00007318752346e-20	9.43139020957746e-17	4
chr7	119836320	119836720	DAR_11	1.67464868301202e-20	1.43573721226195e-16	4
chr15	100181835	100182235	DAR_12	3.35563081577683e-20	2.63716229452888e-16	4
chr16	43664130	43664530	DAR_13	3.63549942827841e-20	2.63733111217424e-16	2
chr17	84332908	84333308	DAR_14	1.12369075730358e-19	7.5694217320735e-16	2
chr4	10770005	10770405	DAR_15	2.25703269981484e-19	1.41902655214292e-15	4
chr12	28834299	28834699	DAR_16	2.70136847341438e-19	1.59223722888931e-15	4
chr15	36396179	36396579	DAR_17	3.0821508888115e-19	1.70981414041851e-15	4
chr9	69034442	69034842	DAR_18	4.24111341379763e-19	2.22203712619452e-15	4
chr1	92064345	92064745	DAR_19	1.10997010453903e-18	5.29482872924502e-15	4
chr9	110907448	110907848	DAR_20	1.12289198664893e-18	5.29482872924502e-15	4
chr9	120691924	120692324	DAR_21	2.14367116408733e-18	9.23127765395951e-15	4
chr1	183987713	183988113	DAR_22	2.15347862181078e-18	9.23127765395951e-15	4
chr8	13987142	13987542	DAR_23	2.51106139528958e-18	1.02961159567641e-14	4
chr18	56447028	56447428	DAR_24	3.98081719878976e-18	1.56424553152611e-14	4
chr19	45796214	45796614	DAR_25	4.97071175073207e-18	1.87509165230516e-14	4
chr6	83095962	83096362	DAR_26	5.57377986522356e-18	2.02171714519092e-14	4
chr12	102628263	102628663	DAR_27	7.19565272736693e-18	2.51333489540664e-14	4
chr15	100750145	100750545	DAR_28	1.20436853758864e-17	4.05644227408471e-14	4
chr12	108003952	108004352	DAR_29	1.25287206841584e-17	4.07429676400319e-14	4
chr12	73598193	73598593	DAR_30	1.73195389671542e-17	5.44451253791805e-14	4
chr10	24640306	24640706	DAR_31	NA	NA	4
chr8	106643109	106643509	DAR_32	2.41565261998237e-17	7.11915473852116e-14	4
chr1	36761595	36761995	DAR_33	3.44849038846697e-17	9.8550540322774e-14	4
chr4	106794239	106794639	DAR_34	5.35891181298569e-17	1.48642028337424e-13	4
chr16	51675114	51675514	DAR_35	6.21897696425735e-17	1.67569445876634e-13	4
chr9	59941790	59942190	DAR_36	6.62971911485399e-17	1.73674700156815e-13	4
chr4	149282320	149282720	DAR_37	9.16940268545679e-17	2.33713205150641e-13	4
chr1	88708917	88709317	DAR_38	9.51608914341015e-17	2.36166794433574e-13	4
chr2	9593956	9594356	DAR_39	9.97629477894739e-17	2.41239597876459e-13	4
chr11	6695239	6695639	DAR_40	1.08447091229667e-16	2.55682995814905e-13	2
chr10	19104618	19105018	DAR_41	1.17901989046472e-16	2.70831574156741e-13	4
chr7	58448638	58449038	DAR_42	1.20615925801723e-16	2.70831574156741e-13	4
chr1	127830249	127830649	DAR_43	2.44115445236339e-16	5.35390588230312e-13	4
chr12	21451362	21451762	DAR_44	2.93529283492156e-16	6.2913332132488e-13	4
chr8	14012536	14012936	DAR_45	4.15621388288451e-16	8.71022361451532e-13	4
chr11	115407036	115407436	DAR_46	5.57696449926788e-16	1.14336258920099e-12	4
chr16	51690863	51691263	DAR_47	5.90364030901815e-16	1.18458426940973e-12	4
chr11	46389522	46389922	DAR_48	NA	NA	4
chr1	162728001	162728401	DAR_49	6.94960819070356e-16	1.33754428498098e-12	4
chr3	127868252	127868652	DAR_50	9.34317233004036e-16	1.76225310585823e-12	4
chr11	5411587	5411987	DAR_51	1.23553627556703e-15	2.28470038313528e-12	4
chr7	68749197	68749597	DAR_52	1.28845098991381e-15	2.32994608018548e-12	4
chr10	61233141	61233541	DAR_53	1.30941650407531e-15	2.32994608018548e-12	4
chr15	100182797	100183197	DAR_54	1.80632138007685e-15	3.15460648872051e-12	4
chr14	75769315	75769715	DAR_55	2.27611060069969e-15	3.90278477127611e-12	4
chr1	88654762	88655162	DAR_56	2.34117961117982e-15	3.94267188556312e-12	4
chr9	57339840	57340240	DAR_57	2.41283829090976e-15	3.99206211755837e-12	4
chr18	80738194	80738594	DAR_58	2.52958618966357e-15	4.11306353083796e-12	4
chr18	56412886	56413286	DAR_59	2.77113871613442e-15	4.42945387970319e-12	4
chr12	73593202	73593602	DAR_60	NA	NA	4
chr2	33908376	33908776	DAR_61	3.70692969073256e-15	5.6605164355257e-12	4
chr18	20946336	20946736	DAR_62	3.72137825402773e-15	5.6605164355257e-12	4
chr17	23620362	23620762	DAR_63	5.13427392365787e-15	7.68568207806988e-12	4
chr15	6592573	6592973	DAR_64	5.35674156856015e-15	7.88719009535043e-12	4
chr14	60129518	60129918	DAR_65	5.43615379767969e-15	7.88719009535043e-12	4
chr18	75478782	75479182	DAR_66	5.81175727716543e-15	8.30438475057031e-12	4
chr9	96696288	96696688	DAR_67	8.00980801491062e-15	1.12743427531668e-11	4
chr10	34110900	34111300	DAR_68	8.57734894721552e-15	1.18956477524273e-11	4
chr8	85624447	85624847	DAR_69	1.05866461138443e-14	1.4469490363164e-11	4
chr11	94697744	94698144	DAR_70	1.1669228542937e-14	1.57212848028395e-11	4
chr13	96956461	96956861	DAR_71	1.24646970194526e-14	1.65564532649791e-11	4
chr12	103331443	103331843	DAR_72	1.28250214890858e-14	1.67984625218224e-11	4
chr3	131199721	131200121	DAR_73	NA	NA	4
chr13	109837505	109837905	DAR_74	1.62893022888271e-14	2.07593950128705e-11	4
chr2	48322288	48322688	DAR_75	1.78299930700633e-14	2.24199087527795e-11	4
chr11	75318776	75319176	DAR_76	2.09382313271106e-14	2.59818655495502e-11	4
chr10	122758317	122758717	DAR_77	2.69682804569233e-14	3.30298392863774e-11	4
chr10	120616610	120617010	DAR_78	3.56805187307634e-14	4.31400343582321e-11	4
chr9	31271241	31271641	DAR_79	3.69423625248396e-14	4.41002959826588e-11	4
chr11	52275340	52275740	DAR_80	4.0520504300816e-14	4.77670899887132e-11	4
chr10	122651935	122652335	DAR_81	4.66549991627763e-14	5.43196667412832e-11	4
chr7	74554917	74555317	DAR_82	5.15314215453408e-14	5.92655338009324e-11	4
chr8	119569860	119570260	DAR_83	5.3734813059279e-14	6.10550483756798e-11	4
chr2	156882516	156882916	DAR_84	6.05132461978912e-14	6.793836558553e-11	4
chr2	9520006	9520406	DAR_85	7.48827901702927e-14	8.30820152069388e-11	4
chr12	17511025	17511425	DAR_86	8.73961818242151e-14	9.58380432476309e-11	4
chr13	95712850	95713250	DAR_87	9.43515473400499e-14	1.0227599281607e-10	4
chr11	32061883	32062283	DAR_88	9.76689554152169e-14	1.04668933844805e-10	4
chr6	142917524	142917924	DAR_89	1.12675137371655e-13	1.19393867192232e-10	4
chr1	60977655	60978055	DAR_90	1.25313540959033e-13	1.31310490080262e-10	4
chr5	28402771	28403171	DAR_91	1.38431286716859e-13	1.43461970949526e-10	4
chr1	60758182	60758582	DAR_92	1.64348115488419e-13	1.68469323123547e-10	4
chr15	66445263	66445663	DAR_93	1.71490736897258e-13	1.73900827145911e-10	4
chr10	111578528	111578928	DAR_94	2.08490561755536e-13	2.07402110841867e-10	4
chr6	72993220	72993620	DAR_95	2.08926172288137e-13	2.07402110841867e-10	4
chr3	38282801	38283201	DAR_96	2.15539443776189e-13	2.10562136902396e-10	4
chr8	81497629	81498029	DAR_97	2.16574880756809e-13	2.10562136902396e-10	4
chr15	81097694	81098094	DAR_98	NA	NA	4
chr15	59913819	59914219	DAR_99	3.03301060800499e-13	2.88923365059724e-10	4
chr3	100443937	100444337	DAR_100	3.38478394038635e-13	3.19208819066015e-10	3
chr9	114440568	114440968	DAR_101	3.50314270642262e-13	3.25825433338923e-10	4
chr7	90344907	90345307	DAR_102	3.52404319939879e-13	3.25825433338923e-10	4
chr17	26572248	26572648	DAR_103	3.64215953363717e-13	3.33476834115263e-10	4
chr11	68453288	68453688	DAR_104	4.37799453125811e-13	3.9699570217246e-10	4
chr12	111691230	111691630	DAR_105	4.69781894185742e-13	4.21940200904521e-10	4
chr6	82921796	82922196	DAR_106	6.77927003707176e-13	6.0314398055295e-10	4
chr1	133815776	133816176	DAR_107	6.88618892184252e-13	6.06930671637572e-10	2
chr10	19321694	19322094	DAR_108	7.35344051451879e-13	6.42111957965484e-10	4
chr16	95263020	95263420	DAR_109	7.62717091402328e-13	6.59904226962196e-10	4
chr10	28668225	28668625	DAR_110	7.78326578877645e-13	6.61290701902754e-10	4
chr19	4059293	4059693	DAR_111	7.78343791141757e-13	6.61290701902754e-10	4
chr16	51705086	51705486	DAR_112	8.71186667706511e-13	7.33562509566053e-10	4
chr10	19506077	19506477	DAR_113	1.00746627053402e-12	8.40806385621701e-10	2
chr19	10763666	10764066	DAR_114	1.04315898044238e-12	8.62957841829642e-10	2
chr10	19498106	19498506	DAR_115	1.08643760460948e-12	8.90944966764403e-10	4
chr9	95315074	95315474	DAR_116	1.15903339030083e-12	9.42284154647413e-10	4
chr14	31399428	31399828	DAR_117	NA	NA	4
chr4	101187390	101187790	DAR_118	1.20708957113957e-12	9.64720306656439e-10	4
chr6	71322431	71322831	DAR_119	1.35288698885711e-12	1.07215725427015e-09	4
chr9	33060694	33061094	DAR_120	1.36651702777406e-12	1.07393434448574e-09	4
chr8	111582427	111582827	DAR_121	1.44751272342565e-12	1.12818663147192e-09	4
chr6	127991775	127992175	DAR_122	1.49879381773137e-12	1.15857990630158e-09	4
chr11	104667409	104667809	DAR_123	1.57516562590292e-12	1.19006882210311e-09	4
chr16	95189178	95189578	DAR_124	1.57561387902138e-12	1.19006882210311e-09	4
chr10	18193168	18193568	DAR_125	1.57738664959005e-12	1.19006882210311e-09	4
chr2	157746552	157746952	DAR_126	1.68616514320956e-12	1.26204108064019e-09	4
chr12	107927936	107928336	DAR_127	1.7572150690116e-12	1.30486363396281e-09	4
chr3	89872190	89872590	DAR_128	1.82725128413119e-12	1.34627020978563e-09	2
chr2	75073183	75073583	DAR_129	1.90927345372007e-12	1.39579729922464e-09	4
chr18	89206321	89206721	DAR_130	2.2246094003546e-12	1.61381722091724e-09	4
chr10	43997267	43997667	DAR_131	2.5085269679025e-12	1.80589047909909e-09	4
chr1	60776966	60777366	DAR_132	2.53941855899977e-12	1.81427989426963e-09	4
chr6	58844182	58844582	DAR_133	2.76368186826627e-12	1.95965824022998e-09	4
chr1	88474579	88474979	DAR_134	3.32225603245096e-12	2.33814925113696e-09	4
chr7	135542313	135542713	DAR_135	3.44891870706112e-12	2.40931241856899e-09	4
chr4	6970488	6970888	DAR_136	3.55966704470734e-12	2.46839352930305e-09	4
chr1	136672517	136672917	DAR_137	3.59348081029716e-12	2.47365251661821e-09	4
chr1	69768746	69769146	DAR_138	3.65592503391545e-12	2.49840088531496e-09	4
chr13	107059481	107059881	DAR_139	4.03324763389102e-12	2.73496780978475e-09	4
chr5	92490834	92491234	DAR_140	4.06009621099033e-12	2.73496780978475e-09	4
chr11	62494795	62495195	DAR_141	4.17083589482503e-12	2.78963844491677e-09	4
chr13	99502560	99502960	DAR_142	4.25288485748718e-12	2.82448459334538e-09	2
chr17	29280374	29280774	DAR_143	4.28967178491235e-12	2.82899354559251e-09	4
chr3	115854822	115855222	DAR_144	4.35301526200858e-12	2.85083201607113e-09	1
chr11	115451962	115452362	DAR_145	4.82464848805383e-12	3.13791810319236e-09	4
chr16	45786667	45787067	DAR_146	5.12321553850193e-12	3.30928142321577e-09	4
chr8	86797710	86798110	DAR_147	5.24370865288659e-12	3.36407096549507e-09	2
chr14	18665616	18666016	DAR_148	5.70658119462765e-12	3.62875334379053e-09	2
chr10	19578222	19578622	DAR_149	5.73323558404773e-12	3.62875334379053e-09	4
chr13	60848732	60849132	DAR_150	5.8083793475814e-12	3.65180554088239e-09	4
chr11	99203935	99204335	DAR_151	5.93550902695942e-12	3.70702019738716e-09	4
chr9	42465618	42466018	DAR_152	6.22787571832644e-12	3.86402812742244e-09	4
chr10	120625443	120625843	DAR_153	7.48532014553635e-12	4.61384370565423e-09	4
chr3	69177424	69177824	DAR_154	7.59658349419428e-12	4.65201947783753e-09	4
chr2	72281921	72282321	DAR_155	8.15486755961331e-12	4.9616844835126e-09	4
chr7	4948350	4948750	DAR_156	8.32503103250159e-12	5.03274808706492e-09	4
chr6	41553313	41553713	DAR_157	8.74831061591037e-12	5.25494859397872e-09	4
chr1	161779037	161779437	DAR_158	9.74883115622999e-12	5.81887987247203e-09	4
chr12	17507143	17507543	DAR_159	1.07426235415972e-11	6.37172703356859e-09	3
chr10	128990960	128991360	DAR_160	1.09057615091792e-11	6.42806031653853e-09	4
chr12	17724570	17724970	DAR_161	NA	NA	4
chr15	36303563	36303963	DAR_162	1.19805143901562e-11	6.97436031229916e-09	4
chr10	42699019	42699419	DAR_163	1.26611674851272e-11	7.3253786626987e-09	4
chr10	81508020	81508420	DAR_164	1.40690615574171e-11	8.08079510355973e-09	4
chr9	123814255	123814655	DAR_165	1.41381996255565e-11	8.08079510355973e-09	4
chr1	69759581	69759981	DAR_166	1.43138560784061e-11	8.1294644025769e-09	4
chr5	28269852	28270252	DAR_167	NA	NA	4
chr6	97317926	97318326	DAR_168	1.5354270198161e-11	8.61913785463075e-09	4
chr7	78737794	78738194	DAR_169	1.85901040765195e-11	1.0373828077777e-08	4
chr3	79227318	79227718	DAR_170	1.93081863868432e-11	1.07111596093178e-08	4
chr1	161788270	161788670	DAR_171	1.9798183835325e-11	1.09187562746082e-08	4
chr13	112417842	112418242	DAR_172	2.32163132990645e-11	1.27294235947376e-08	4
chr2	158133059	158133459	DAR_173	2.36686225941471e-11	1.29024091964522e-08	4
chr17	80323590	80323990	DAR_174	2.4309744533077e-11	1.31757418257523e-08	4
chr3	8766717	8767117	DAR_175	2.66696320037797e-11	1.43721884878883e-08	4
chr7	114103904	114104304	DAR_176	2.69716000369926e-11	1.4452333435731e-08	1
chr4	102990842	102991242	DAR_177	2.72707397696808e-11	1.45162297155717e-08	4
chr7	45733468	45733868	DAR_178	2.73986966966584e-11	1.45162297155717e-08	4
chr11	62507693	62508093	DAR_179	2.99759365696378e-11	1.57929645255465e-08	4
chr17	84330445	84330845	DAR_180	3.05905488494012e-11	1.5959285884347e-08	4
chr2	3710529	3710929	DAR_181	3.06300777786041e-11	1.5959285884347e-08	4
chr18	73643036	73643436	DAR_182	3.19706069968971e-11	1.65662199673427e-08	2
chr8	12756755	12757155	DAR_183	3.65019844455364e-11	1.88108887819956e-08	2
chr14	75516153	75516553	DAR_184	3.71055167778106e-11	1.90179889715488e-08	4
chr6	124885132	124885532	DAR_185	3.80483324930118e-11	1.93169665214091e-08	4
chr11	118337614	118338014	DAR_186	NA	NA	4
chr2	59469693	59470093	DAR_187	3.83948265333697e-11	1.93631064485695e-08	4
chr18	75322180	75322580	DAR_188	4.29442228914568e-11	2.15422384480033e-08	4
chr1	193421418	193421818	DAR_189	4.4403121823474e-11	2.21562180413035e-08	4
chr12	17471416	17471816	DAR_190	4.98353149222645e-11	2.47358897072315e-08	2
chr9	45009325	45009725	DAR_191	NA	NA	4
chr15	6601337	6601737	DAR_192	5.34905965329091e-11	2.62082857987983e-08	4
chr12	111377432	111377832	DAR_193	5.36354582286369e-11	2.62082857987983e-08	3
chr13	95964188	95964588	DAR_195	5.80634172166782e-11	2.80809573715552e-08	4
chr7	90353804	90354204	DAR_196	5.9597240738052e-11	2.86756988892014e-08	4
chr4	101175206	101175606	DAR_197	7.76775463683388e-11	3.71854637835478e-08	4
chr10	42838795	42839195	DAR_198	7.9956833924313e-11	3.80669015158371e-08	4
chr11	11726140	11726540	DAR_199	8.03260988224795e-11	3.80669015158371e-08	2
chr5	107840589	107840989	DAR_201	8.27395446699938e-11	3.88204887522045e-08	4
chr5	72634709	72635109	DAR_202	8.41300233757429e-11	3.92774758143375e-08	4
chr15	60111802	60112202	DAR_203	9.15597552829762e-11	4.25355952781854e-08	4
chr12	17505694	17506094	DAR_205	9.65967469271804e-11	4.44378020120078e-08	3
chr6	84617055	84617455	DAR_206	1.01059922203849e-10	4.62653305013512e-08	4
chr1	36723157	36723557	DAR_207	1.02344441333365e-10	4.66270397527811e-08	4
chr10	122717707	122718107	DAR_208	1.0466475443511e-10	4.7454899021692e-08	4
chr9	52349195	52349595	DAR_209	1.07357704190638e-10	4.84429809048158e-08	3
chr9	69289597	69289997	DAR_210	1.10479885107186e-10	4.96144120228734e-08	1
chr11	68447236	68447636	DAR_211	1.1813146031497e-10	5.27991641133834e-08	4
chr19	57429956	57430356	DAR_212	1.24365754024844e-10	5.53234017208538e-08	4
chr10	117918521	117918921	DAR_213	1.30595012446396e-10	5.78217081632969e-08	4
chr2	170050618	170051018	DAR_214	1.34436695481636e-10	5.88604741347406e-08	4
chr12	25958586	25958986	DAR_215	1.34535473414686e-10	5.88604741347406e-08	4
chr4	152197631	152198031	DAR_216	1.34999961678044e-10	5.88604741347406e-08	4
chr9	120339975	120340375	DAR_217	1.35437696960339e-10	5.88604741347406e-08	4
chr4	155168877	155169277	DAR_218	1.38123876812107e-10	5.97525158280707e-08	4
chr8	94413530	94413930	DAR_219	1.47756138436646e-10	6.35220664162835e-08	2
chr12	73698396	73698796	DAR_220	1.48184701152432e-10	6.35220664162835e-08	4
chr13	48573553	48573953	DAR_221	1.51016307198066e-10	6.44429632711676e-08	4
chr15	60132715	60133115	DAR_222	1.541835972677e-10	6.54981644483108e-08	4
chr4	19926968	19927368	DAR_223	1.6791483412395e-10	7.1011409245414e-08	4
chr8	86686613	86687013	DAR_224	1.70513486201356e-10	7.17884613535324e-08	4
chr6	140708059	140708459	DAR_225	1.73221705420744e-10	7.228752768684e-08	4
chr1	165788499	165788899	DAR_226	1.74670848624164e-10	7.228752768684e-08	4
chr6	142941958	142942358	DAR_227	1.74698462275549e-10	7.228752768684e-08	4
chr6	124750410	124750810	DAR_228	1.74764930626566e-10	7.228752768684e-08	4
chr3	101280301	101280701	DAR_229	1.76554731824807e-10	7.27089392759916e-08	4
chr2	11204265	11204665	DAR_230	1.80919501068209e-10	7.41825016836505e-08	4
chr9	112174866	112175266	DAR_231	1.82479251847304e-10	7.4498142008501e-08	4
chr16	95900235	95900635	DAR_232	1.89724885884669e-10	7.71223483324374e-08	4
chr9	95072565	95072965	DAR_233	1.9257196767985e-10	7.79437105407021e-08	4
chr7	37490289	37490689	DAR_234	2.01486033217437e-10	8.1203176643747e-08	4
chr9	116294026	116294426	DAR_235	2.04027507968888e-10	8.1877541251157e-08	4
chr13	30166189	30166589	DAR_236	2.11106982132359e-10	8.43596023896456e-08	4
chr4	57834045	57834445	DAR_237	2.16616794150501e-10	8.61961181685707e-08	4
chr8	13979765	13980165	DAR_238	2.22837712637188e-10	8.82989754860306e-08	4
chr5	92165954	92166354	DAR_239	2.30402092822897e-10	9.08143171061668e-08	4
chr2	17671653	17672053	DAR_240	2.32070405831535e-10	9.08143171061668e-08	4
chr4	40839285	40839685	DAR_241	2.32074505843534e-10	9.08143171061668e-08	2
chr1	127796357	127796757	DAR_242	2.34068693527987e-10	9.1216182977454e-08	4
chr13	56507062	56507462	DAR_243	2.36311161264049e-10	9.17110974704884e-08	4
chr2	29095656	29096056	DAR_244	2.3751413894417e-10	9.18001881205241e-08	4
chr10	122680369	122680769	DAR_245	2.46273984956869e-10	9.46237071112091e-08	4
chr6	67348031	67348431	DAR_246	2.46826131139337e-10	9.46237071112091e-08	4
chr17	52468413	52468813	DAR_247	2.51192144356166e-10	9.59076014485707e-08	4
chr6	108503654	108504054	DAR_248	2.56825561982875e-10	9.76630978787057e-08	4
chr15	6569027	6569427	DAR_249	2.58248744033774e-10	9.78098968015788e-08	4
chr1	106600791	106601191	DAR_250	2.62644251790616e-10	9.90285184073275e-08	4
chr15	58175022	58175422	DAR_251	2.63786355339025e-10	9.90285184073275e-08	4
chr6	48727706	48728106	DAR_252	2.64616482749388e-10	9.90285184073275e-08	4
chr6	99309533	99309933	DAR_253	2.77870139110137e-10	1.03577467229485e-07	4
chr1	43464966	43465366	DAR_254	2.86028738325999e-10	1.05992035967463e-07	4
chr6	59412406	59412806	DAR_255	2.86595577970914e-10	1.05992035967463e-07	4
chr9	44980258	44980658	DAR_256	2.91065682078127e-10	1.07224731561492e-07	4
chr7	143740190	143740590	DAR_257	3.12111877877683e-10	1.14530485863855e-07	4
chr12	32696783	32697183	DAR_258	3.30705292950377e-10	1.20761393147688e-07	1
chr7	109741733	109742133	DAR_259	3.3165301436003e-10	1.20761393147688e-07	4
chr12	104056962	104057362	DAR_260	3.40954073089482e-10	1.23670599118653e-07	1
chr12	107993020	107993420	DAR_261	3.45831951134606e-10	1.24959286650005e-07	4
chr10	122678642	122679042	DAR_262	3.5837889645134e-10	1.28998620563498e-07	2
chr4	150798883	150799283	DAR_263	3.62573406127078e-10	1.29615422799197e-07	1
chr4	154936708	154937108	DAR_264	3.64192197116291e-10	1.29615422799197e-07	4
chr18	32970206	32970606	DAR_265	3.64215668421084e-10	1.29615422799197e-07	4
chr13	63223400	63223800	DAR_266	3.93646823759698e-10	1.39562597775586e-07	4
chr17	70973422	70973822	DAR_267	4.0402442701387e-10	1.42705361941562e-07	4
chr1	43880380	43880780	DAR_268	4.10149034489622e-10	1.44328078341839e-07	4
chr9	120082682	120083082	DAR_269	4.41632757634505e-10	1.54829221093819e-07	4
chr3	103386506	103386906	DAR_270	4.76809997972742e-10	1.66182673352585e-07	4
chr5	115711784	115712184	DAR_271	NA	NA	2
chr18	84874145	84874545	DAR_272	4.79303627004392e-10	1.66182673352585e-07	4
chr13	30136241	30136641	DAR_273	4.96331409786966e-10	1.71456140156701e-07	4
chr10	118633429	118633829	DAR_274	5.01877125910908e-10	1.72739146398832e-07	4
chr8	125649417	125649817	DAR_275	5.06820688394799e-10	1.7380632240163e-07	1
chr2	32542033	32542433	DAR_276	5.13367080394877e-10	1.75413439314492e-07	4
chr6	99643420	99643820	DAR_277	5.19836592384374e-10	1.76982778043297e-07	4
chr6	50416791	50417191	DAR_278	5.24391026140394e-10	1.7789116727418e-07	1
chr2	4580730	4581130	DAR_279	5.37723419134046e-10	1.81760152287722e-07	4
chr9	114443373	114443773	DAR_280	5.40310572417064e-10	1.81982389831914e-07	4
chr6	94681465	94681865	DAR_281	5.50228348704634e-10	1.84663291392484e-07	2
chr9	44031147	44031547	DAR_282	5.64577788010731e-10	1.88218909809101e-07	4
chr8	124242200	124242600	DAR_283	5.64814398464329e-10	1.88218909809101e-07	4
chr7	125488745	125489145	DAR_284	5.99759063993372e-10	1.99160133971912e-07	4
chr13	56476737	56477137	DAR_285	6.49393126608767e-10	2.14885324881028e-07	4
chr2	150570142	150570542	DAR_286	6.55661978638643e-10	2.16201098669491e-07	2
chr7	24378223	24378623	DAR_287	6.73688657497146e-10	2.21371276036876e-07	4
chr17	12779449	12779849	DAR_288	7.01898580496191e-10	2.29441045932088e-07	4
chr8	125667271	125667671	DAR_289	7.0311283652723e-10	2.29441045932088e-07	4
chr2	68382634	68383034	DAR_290	7.06479341689933e-10	2.29744645781905e-07	4
chr10	122739109	122739509	DAR_291	7.66370213410834e-10	2.48364521361291e-07	2
chr5	122288405	122288805	DAR_292	7.79722439203401e-10	2.51826315321764e-07	1
chr6	140514712	140515112	DAR_293	8.07041008443998e-10	2.59759782878253e-07	4
chr11	4206577	4206977	DAR_294	8.34640158118327e-10	2.67729283645119e-07	4
chr2	117418667	117419067	DAR_295	8.64085890253805e-10	2.76235078142934e-07	4
chr18	14603492	14603892	DAR_296	8.86921880169008e-10	2.8257750592263e-07	4
chr11	63984701	63985101	DAR_297	9.2370498786348e-10	2.93305879765795e-07	4
chr7	58701330	58701730	DAR_298	9.27276350755713e-10	2.93451848358118e-07	4
chr15	93712585	93712985	DAR_299	9.44141420700548e-10	2.97789782481627e-07	4
chr2	140042636	140043036	DAR_300	9.51506527505557e-10	2.99112420298222e-07	2
chr5	74404107	74404507	DAR_301	9.58083991411103e-10	3.00179491621285e-07	4
chr9	110880024	110880424	DAR_302	1.00042298324047e-09	3.12406921458474e-07	4
chr2	145197076	145197476	DAR_303	1.02064527202292e-09	3.17628971602059e-07	4
chr11	33700650	33701050	DAR_304	1.02575999589407e-09	3.17628971602059e-07	1
chr11	88430307	88430707	DAR_305	1.02724968813161e-09	3.17628971602059e-07	4
chr14	86736662	86737062	DAR_306	1.04457797967325e-09	3.21931423297534e-07	4
chr3	100442476	100442876	DAR_307	1.10492913096402e-09	3.39421992031998e-07	3
chr1	92069460	92069860	DAR_308	1.14815197893531e-09	3.51554443757963e-07	4
chr1	91095246	91095646	DAR_309	1.16497744506775e-09	3.55551870265386e-07	4
chr5	74200382	74200782	DAR_310	NA	NA	4
chr1	161670878	161671278	DAR_311	1.25996806701164e-09	3.8207012378028e-07	1
chr2	114145346	114145746	DAR_312	1.30259997781208e-09	3.93731718293347e-07	4
chr7	68070645	68071045	DAR_313	1.34101647910268e-09	4.04048693593407e-07	4
chr7	76237532	76237932	DAR_314	1.35028513726228e-09	4.05545670190426e-07	4
chr3	100562603	100563003	DAR_315	NA	NA	4
chr8	124317805	124318205	DAR_316	1.40130953768389e-09	4.18206641045426e-07	4
chr2	126474035	126474435	DAR_317	1.40863837009591e-09	4.19067693276451e-07	4
chr4	86721834	86722234	DAR_318	1.4371770454954e-09	4.26213382482814e-07	4
chr14	60117964	60118364	DAR_319	NA	NA	4
chr2	157121773	157122173	DAR_320	1.47241293546724e-09	4.33933895953465e-07	4
chr4	47818867	47819267	DAR_321	1.53106813561503e-09	4.49814463132231e-07	1
chr10	75531710	75532110	DAR_322	1.58870841771756e-09	4.65299145185371e-07	4
chr16	92641028	92641428	DAR_323	1.66855683461963e-09	4.8717210341323e-07	4
chr11	63046389	63046789	DAR_324	1.73292738710158e-09	5.0440488609688e-07	2
chr12	25784453	25784853	DAR_325	1.74080855297403e-09	5.05139791400991e-07	4
chr7	63816174	63816574	DAR_326	NA	NA	4
chr3	38280139	38280539	DAR_327	1.86406661942351e-09	5.37597953143649e-07	4
chr2	25620381	25620781	DAR_328	1.9485294559002e-09	5.60243803041403e-07	4
chr3	115974271	115974671	DAR_329	2.01134606221491e-09	5.76547152247117e-07	4
chr4	150924341	150924741	DAR_330	2.0536900295245e-09	5.86901047316264e-07	4
chr11	87935472	87935872	DAR_331	2.0715164775759e-09	5.9020696208686e-07	4
chr17	84855526	84855926	DAR_332	2.1816961210307e-09	6.19726554476031e-07	4
chr11	106536123	106536523	DAR_333	2.25751745559531e-09	6.39338434488971e-07	4
chr3	129602257	129602657	DAR_334	2.31781316887985e-09	6.54449121310035e-07	4
chr6	100086788	100087188	DAR_335	2.33520239524024e-09	6.57390842650511e-07	1
chr1	62875686	62876086	DAR_336	2.37763645542576e-09	6.65616306272812e-07	4
chr12	107160123	107160523	DAR_337	2.37853706738564e-09	6.65616306272812e-07	4
chr15	93595731	93596131	DAR_338	2.42423180026161e-09	6.76396533690152e-07	4
chr8	25274838	25275238	DAR_339	2.43886154720006e-09	6.78471138441878e-07	4
chr15	78835109	78835509	DAR_340	2.5956894687469e-09	7.19975549203275e-07	4
chr9	15534099	15534499	DAR_341	2.84194999928689e-09	7.85970025169352e-07	1
chr11	104661095	104661495	DAR_342	2.85916765696664e-09	7.88419661478226e-07	4
chr7	126178788	126179188	DAR_343	2.90272017113473e-09	7.98095717723624e-07	4
chr3	60785312	60785712	DAR_344	NA	NA	4
chr3	35720906	35721306	DAR_345	3.00957776023775e-09	8.21645229880316e-07	4
chr2	11218110	11218510	DAR_346	3.02108822771391e-09	8.21645229880316e-07	4
chr12	107998728	107999128	DAR_347	3.02322091433796e-09	8.21645229880316e-07	4
chr1	61046023	61046423	DAR_348	3.09364752759248e-09	8.35998219788086e-07	4
chr9	52278061	52278461	DAR_349	3.09376163705814e-09	8.35998219788086e-07	2
chr4	6975787	6976187	DAR_350	3.11672838866273e-09	8.39798011856045e-07	4
chr11	86578926	86579326	DAR_351	3.12900842229161e-09	8.40704835558562e-07	1
chr1	60746169	60746569	DAR_352	3.1927554055797e-09	8.55395409187513e-07	4
chr4	46151887	46152287	DAR_353	3.41188325121928e-09	9.10381326527828e-07	4
chr16	94254584	94254984	DAR_354	3.41729659082413e-09	9.10381326527828e-07	4
chr18	89245543	89245943	DAR_355	3.52563029660005e-09	9.36596102482989e-07	4
chr3	101029321	101029721	DAR_356	3.54090611653169e-09	9.38011890819534e-07	4
chr1	152008711	152009111	DAR_357	3.56437914078682e-09	9.41585164230205e-07	4
chr11	63989477	63989877	DAR_358	3.66050583848888e-09	9.64277441649081e-07	4
chr13	73736903	73737303	DAR_359	3.74132505970293e-09	9.82822123691935e-07	4
chr6	38120678	38121078	DAR_360	3.75376131895148e-09	9.83349913073214e-07	4
chr7	79300756	79301156	DAR_361	3.83334359776583e-09	9.98763721050294e-07	4
chr2	31987750	31988150	DAR_362	3.83378187218559e-09	9.98763721050294e-07	1
chr16	23174935	23175335	DAR_363	3.88975665756481e-09	1.01055449340211e-06	4
chr7	58749946	58750346	DAR_364	3.95092494543004e-09	1.02362604073811e-06	2
chr1	120055468	120055868	DAR_365	4.08453503479178e-09	1.0553431384277e-06	2
chr5	118029458	118029858	DAR_366	4.35176669387626e-09	1.12131710819505e-06	2
chr1	153085151	153085551	DAR_367	4.42789208884136e-09	1.13735079929781e-06	4
chr1	171643661	171644061	DAR_368	4.43811269727162e-09	1.13735079929781e-06	1
chr8	126626937	126627337	DAR_369	4.72127921350307e-09	1.20663869590199e-06	4
chr14	51913222	51913622	DAR_370	5.0705746087305e-09	1.29240724223121e-06	2
chr2	38536349	38536749	DAR_371	5.09957117442442e-09	1.29629449796885e-06	1
chr11	82947460	82947860	DAR_372	5.1240012847174e-09	1.29900319666087e-06	2
chr6	142964979	142965379	DAR_373	5.14836649318385e-09	1.30168096212517e-06	4
chr13	94285127	94285527	DAR_374	5.23412841232861e-09	1.31757311551301e-06	2
chr7	117771746	117772146	DAR_375	5.23916483736497e-09	1.31757311551301e-06	2
chr19	10787404	10787804	DAR_376	5.2814419836144e-09	1.32467273709767e-06	4
chr8	128473888	128474288	DAR_377	5.44029906639208e-09	1.36089730518365e-06	4
chr7	140208085	140208485	DAR_378	5.48970608259787e-09	1.36962357548031e-06	4
chr9	32926273	32926673	DAR_379	5.50496709717139e-09	1.36980720853019e-06	4
chr5	53402579	53402979	DAR_380	5.60982767845513e-09	1.39222636545281e-06	3
chr12	107138957	107139357	DAR_381	5.74302316997407e-09	1.42154143330904e-06	4
chr5	64684216	64684616	DAR_382	5.79008921928762e-09	1.42943964398785e-06	4
chr5	123083416	123083816	DAR_383	5.98369436143059e-09	1.47337927974787e-06	1
chr9	41078298	41078698	DAR_384	6.0878822932958e-09	1.49512998810898e-06	4
chr11	78600031	78600431	DAR_386	6.49709248782797e-09	1.5873608840663e-06	4
chr6	94661331	94661731	DAR_387	6.6903885616755e-09	1.62747591524394e-06	4
chr2	128331159	128331559	DAR_388	6.69579835128516e-09	1.62747591524394e-06	3
chr5	115754823	115755223	DAR_389	6.77134260268431e-09	1.64160670136594e-06	4
chr4	135406184	135406584	DAR_390	7.47079309878928e-09	1.80653355068595e-06	2
chr18	38406209	38406609	DAR_391	7.77060525655157e-09	1.87422626580463e-06	2
chr4	156022076	156022476	DAR_392	7.79908248181496e-09	1.87629610105236e-06	4
chr13	108303133	108303533	DAR_393	7.99901257261364e-09	1.91949841904701e-06	4
chr4	142079650	142080050	DAR_394	8.13153600534582e-09	1.94598985815508e-06	1
chr14	54211118	54211518	DAR_395	8.15067804056174e-09	1.94598985815508e-06	4
chr18	75353459	75353859	DAR_397	8.5193126330872e-09	2.02375520526084e-06	4
chr1	165789958	165790358	DAR_398	8.67020762657548e-09	2.05442530311421e-06	4
chr6	41544509	41544909	DAR_399	8.88681386617886e-09	2.1004730708715e-06	4
chr7	143625100	143625500	DAR_400	9.09385305400205e-09	2.14403499990943e-06	4
chr9	116187417	116187817	DAR_401	9.15569048693984e-09	2.15323117893226e-06	4
chr7	98692737	98693137	DAR_402	9.66272740968955e-09	2.2668229697154e-06	4
chr19	46620000	46620400	DAR_403	9.83530078539275e-09	2.30158240984624e-06	4
chr2	165453159	165453559	DAR_404	NA	NA	4
chr15	76317015	76317415	DAR_405	NA	NA	4
chr3	100558287	100558687	DAR_406	1.00516696255552e-08	2.33483450092915e-06	4
chr5	92103015	92103415	DAR_407	1.03645683927763e-08	2.4016003720333e-06	4
chr9	42469328	42469728	DAR_408	1.05287423638401e-08	2.43366202477124e-06	4
chr9	96773153	96773553	DAR_409	1.08043866282855e-08	2.48780219941288e-06	4
chr16	95860840	95861240	DAR_410	1.08157284375421e-08	2.48780219941288e-06	4
chr4	137748699	137749099	DAR_411	1.08966936263668e-08	2.50032721611137e-06	1
chr3	52878295	52878695	DAR_412	1.09863382365057e-08	2.51323523477629e-06	4
chr19	32197278	32197678	DAR_413	1.10062471710754e-08	2.51323523477629e-06	4
chr1	191281158	191281558	DAR_414	1.11534939626206e-08	2.5407066549103e-06	2
chr9	15550584	15550984	DAR_415	1.14899116144824e-08	2.61103396295661e-06	4
chr7	114088004	114088404	DAR_416	1.1791046351384e-08	2.67302453908647e-06	2
chr11	79652929	79653329	DAR_417	1.19264256758708e-08	2.69254040061673e-06	2
chr14	118173604	118174004	DAR_418	1.1959090550741e-08	2.69254040061673e-06	4
chr9	111096561	111096961	DAR_419	NA	NA	4
chr13	45832914	45833314	DAR_420	1.20930403701881e-08	2.7153770433127e-06	1
chr8	34163348	34163748	DAR_421	1.24215283483249e-08	2.78251086447857e-06	4
chr11	106056852	106057252	DAR_422	1.27734122826636e-08	2.85455495768047e-06	4
chr1	152010252	152010652	DAR_423	1.28343658828127e-08	2.86139608347616e-06	4
chr9	51765103	51765503	DAR_424	1.36551951187293e-08	3.03721812750473e-06	2
chr18	75426174	75426574	DAR_425	1.38724406353262e-08	3.07827825646048e-06	1
chr6	41532659	41533059	DAR_426	1.42745485608592e-08	3.15052862089567e-06	4
chr11	11719749	11720149	DAR_427	1.4274849659985e-08	3.15052862089567e-06	4
chr11	58211564	58211964	DAR_428	1.43016431788541e-08	3.15052862089567e-06	4
chr1	58301128	58301528	DAR_430	1.4468523671317e-08	3.17321642295556e-06	4
chr14	48226027	48226427	DAR_431	1.46699157018487e-08	3.20992051065951e-06	4
chr13	112507713	112508113	DAR_432	1.47964251255816e-08	3.23010755629219e-06	4
chr9	100462061	100462461	DAR_433	1.51607988451247e-08	3.30200798311127e-06	4
chr8	123162792	123163192	DAR_434	1.61724744813147e-08	3.51423398827037e-06	4
chr2	140395141	140395541	DAR_435	1.76828686934865e-08	3.83360528247502e-06	2
chr1	80440914	80441314	DAR_436	1.79304047947663e-08	3.87835478206428e-06	4
chr7	101580834	101581234	DAR_437	1.81851303708727e-08	3.92445100660388e-06	4
chr13	28551619	28552019	DAR_438	1.83002327149545e-08	3.94027407910779e-06	4
chr10	85386589	85386989	DAR_439	1.87536985735146e-08	4.02871310107617e-06	4
chr3	100439022	100439422	DAR_440	1.88871600416388e-08	4.04816227737915e-06	3
chr2	11216441	11216841	DAR_441	1.91989491682966e-08	4.10565827486293e-06	4
chr15	31344716	31345116	DAR_442	1.94880793731045e-08	4.15805950551893e-06	3
chr9	123058688	123059088	DAR_443	2.04316089302811e-08	4.34953440945376e-06	4
chr11	88864470	88864870	DAR_444	2.06859134534563e-08	4.39375324336735e-06	1
chr12	77113503	77113903	DAR_445	2.07572083531729e-08	4.39898887227567e-06	4
chr9	44981611	44982011	DAR_446	2.12462421554566e-08	4.49253219496558e-06	4
chr12	118373151	118373551	DAR_447	2.13212264429373e-08	4.49830179452816e-06	4
chr10	84897454	84897854	DAR_448	2.17552925798086e-08	4.57963477081251e-06	4
chr4	133298445	133298845	DAR_449	2.2091598484758e-08	4.64007211203134e-06	4
chr12	73604687	73605087	DAR_450	2.29596691571371e-08	4.81168337600473e-06	4
chr5	65795235	65795635	DAR_451	2.37125460879816e-08	4.95844586234875e-06	4
chr1	92468840	92469240	DAR_452	2.37985734323833e-08	4.9654249218756e-06	4
chr17	47139873	47140273	DAR_453	2.3967905553066e-08	4.9897158255916e-06	1
chr8	10840889	10841289	DAR_454	2.40348619615456e-08	4.99263375992838e-06	2
chr15	78495034	78495434	DAR_455	2.41507271100278e-08	5.00567609135251e-06	3
chr15	36346034	36346434	DAR_456	2.45965635223825e-08	5.08690376338887e-06	4
chr1	179549402	179549802	DAR_457	2.48990551044424e-08	5.12779045058225e-06	4
chr18	82503815	82504215	DAR_458	2.49030085398398e-08	5.12779045058225e-06	1
chr3	52647919	52648319	DAR_459	2.50588792171503e-08	5.14864427523267e-06	4
chr8	81558548	81558948	DAR_460	2.52855870387e-08	5.18393012360583e-06	4
chr18	14667079	14667479	DAR_461	2.56180977395574e-08	5.24070703584476e-06	4
chr18	32939121	32939521	DAR_462	2.59328986383709e-08	5.2936230993265e-06	4
chr12	107918751	107919151	DAR_463	2.60819490811207e-08	5.31254939955345e-06	4
chr5	112283127	112283527	DAR_464	2.6486009990048e-08	5.38322444855917e-06	2
chr9	72890691	72891091	DAR_465	2.7086573522453e-08	5.49344836383221e-06	4
chr2	49846098	49846498	DAR_466	2.74359742083143e-08	5.5523699992779e-06	4
chr14	25857932	25858332	DAR_467	2.78123960243498e-08	5.61649599971811e-06	2
chr9	44954381	44954781	DAR_468	2.78796126805171e-08	5.61803981423404e-06	4
chr6	120199546	120199946	DAR_469	2.82018818318718e-08	5.67086326208599e-06	4
chr15	36364058	36364458	DAR_470	2.84200670147743e-08	5.69288871084906e-06	4
chr1	136600609	136601009	DAR_471	2.84343215884952e-08	5.69288871084906e-06	2
chr12	100903649	100904049	DAR_472	2.84925135092915e-08	5.69288871084906e-06	1
chr8	25578254	25578654	DAR_473	2.86523562556858e-08	5.71272253996821e-06	4
chr18	70611746	70612146	DAR_474	2.87525653881124e-08	5.72060798324202e-06	4
chr14	79243477	79243877	DAR_475	2.88910470396805e-08	5.73605889088663e-06	4
chr2	156887052	156887452	DAR_476	2.90228068610423e-08	5.75011312320235e-06	2
chr10	82887331	82887731	DAR_477	2.91537931459542e-08	5.76395549311427e-06	4
chr10	41619989	41620389	DAR_478	2.92697337254931e-08	5.77477150303363e-06	4
chr13	109837936	109838336	DAR_479	2.95240601235552e-08	5.81278817969127e-06	4
chr4	155197721	155198121	DAR_480	2.96958533350697e-08	5.83443091764671e-06	4
chr2	153336112	153336512	DAR_481	3.00950535201781e-08	5.90057008799882e-06	4
chr19	53807252	53807652	DAR_482	3.02230655679785e-08	5.91337478116047e-06	4
chr4	135120287	135120687	DAR_483	3.05037899946061e-08	5.95594394000273e-06	2
chr7	74690718	74691118	DAR_484	3.07196208749277e-08	5.98569273936323e-06	4
chr10	14314622	14315022	DAR_485	3.13190057288175e-08	6.08989994488163e-06	4
chr13	117051389	117051789	DAR_486	3.1628299524317e-08	6.13738692024643e-06	4
chr17	51880207	51880607	DAR_487	3.19920949840916e-08	6.19523306296658e-06	4
chr3	104616172	104616572	DAR_488	3.21123355347585e-08	6.20577464605833e-06	4
chr10	85411121	85411521	DAR_489	3.25121230140128e-08	6.27018565456545e-06	4
chr11	52318462	52318862	DAR_490	3.48020381002564e-08	6.69811389208343e-06	4
chr16	93572325	93572725	DAR_491	3.50701717125356e-08	6.73597287921405e-06	4
chr18	75424412	75424812	DAR_492	3.52499648082351e-08	6.75674477880127e-06	4
chr16	78198680	78199080	DAR_493	3.62334816873388e-08	6.92286341335121e-06	4
chr13	99475411	99475811	DAR_494	3.62634218689545e-08	6.92286341335121e-06	4
chr4	130774794	130775194	DAR_495	3.72525836715586e-08	7.08399551348613e-06	4
chr17	32053654	32054054	DAR_496	3.72576985238542e-08	7.08399551348613e-06	4
chr5	149080467	149080867	DAR_497	3.73777816625764e-08	7.09252807897906e-06	4
chr1	60755811	60756211	DAR_498	3.92699827102273e-08	7.43661497882209e-06	4
chr2	166708321	166708721	DAR_499	3.96448989686953e-08	7.49256811030211e-06	4
chr18	46745742	46746142	DAR_500	3.98378900120282e-08	7.51398378672869e-06	4
chr10	41615451	41615851	DAR_501	4.01082116058016e-08	7.54987048285096e-06	2
chr15	39943751	39944151	DAR_502	4.04630842763566e-08	7.60149818496089e-06	4
chr8	119947669	119948069	DAR_503	4.08672895087289e-08	7.66216992385625e-06	4
chr8	35628224	35628624	DAR_504	4.17416340014256e-08	7.81057197970722e-06	4
chr11	6704822	6705222	DAR_505	4.21709184039461e-08	7.86797755182301e-06	4
chr9	44022098	44022498	DAR_506	4.22157563804887e-08	7.86797755182301e-06	4
chr7	90007221	90007621	DAR_507	4.22987118535662e-08	7.86797755182301e-06	1
chr17	88757925	88758325	DAR_508	4.24946903901613e-08	7.88887158784436e-06	4
chr16	35776719	35777119	DAR_509	4.26485046200492e-08	7.90187136582119e-06	2
chr6	67399528	67399928	DAR_510	4.3398402231142e-08	8.02504533178884e-06	4
chr17	46966889	46967289	DAR_511	4.36286608562727e-08	8.05183585004405e-06	4
chr17	12759146	12759546	DAR_512	4.63539976350528e-08	8.53809854486117e-06	4
chr18	89159827	89160227	DAR_513	4.67258566665432e-08	8.58981552563682e-06	4
chr14	48376119	48376519	DAR_514	4.71213860638418e-08	8.6328689425296e-06	4
chr12	107124340	107124740	DAR_515	4.71431336528863e-08	8.6328689425296e-06	4
chr4	116010233	116010633	DAR_516	4.75475823364164e-08	8.69005784379926e-06	4
chr10	111214696	111215096	DAR_517	4.87126043999489e-08	8.8857632169168e-06	4
chr8	34120382	34120782	DAR_518	4.9572154562644e-08	9.02509880374376e-06	4
chr8	10683120	10683520	DAR_519	5.0779131050155e-08	9.22702796136217e-06	4
chr7	19945756	19946156	DAR_520	5.13402813072869e-08	9.31105367162751e-06	4
chr7	99889292	99889692	DAR_521	5.23657792004784e-08	9.47880909608353e-06	4
chr12	73609641	73610041	DAR_522	5.33453712042118e-08	9.63762820336323e-06	4
chr7	81179463	81179863	DAR_523	5.38009767422369e-08	9.70135509298305e-06	4
chr8	124319421	124319821	DAR_524	NA	NA	4
chr3	135513233	135513633	DAR_525	5.63763396250296e-08	1.00981326167827e-05	4
chr10	93938757	93939157	DAR_526	5.63877003492949e-08	1.00981326167827e-05	4
chr12	80998502	80998902	DAR_527	5.64297018147593e-08	1.00981326167827e-05	2
chr19	33429459	33429859	DAR_528	5.85006412632051e-08	1.04489014689566e-05	4
chr8	13992478	13992878	DAR_529	5.94556163591131e-08	1.05993966199979e-05	3
chr16	52129480	52129880	DAR_530	5.98512593414545e-08	1.06497975749331e-05	4
chr3	52954549	52954949	DAR_531	6.23031966927382e-08	1.1065211997179e-05	4
chr9	123806293	123806693	DAR_532	6.68644275076916e-08	1.184330180542e-05	4
chr11	5509201	5509601	DAR_533	6.69927348464447e-08	1.184330180542e-05	2
chr7	140213857	140214257	DAR_534	6.70610152384691e-08	1.184330180542e-05	4
chr11	117292426	117292826	DAR_535	6.81807424525578e-08	1.2005646347619e-05	2
chr5	134332771	134333171	DAR_536	6.82348759087212e-08	1.2005646347619e-05	2
chr15	80192225	80192625	DAR_537	6.97242105875776e-08	1.22448438135618e-05	4
chr9	50467602	50468002	DAR_538	7.07041037242262e-08	1.2390969958073e-05	4
chr5	92245463	92245863	DAR_539	7.09357338235907e-08	1.2390969958073e-05	4
chr3	131153897	131154297	DAR_540	7.095044670448e-08	1.2390969958073e-05	4
chr19	33265224	33265624	DAR_541	7.13851556104367e-08	1.24438444919657e-05	4
chr17	78086915	78087315	DAR_542	7.18129778833163e-08	1.24953256554279e-05	4
chr6	114936493	114936893	DAR_543	7.23898171983324e-08	1.25714163029652e-05	4
chr10	122742119	122742519	DAR_544	7.26071305314917e-08	1.25714163029652e-05	4
chr7	25835470	25835870	DAR_545	7.26501944194604e-08	1.25714163029652e-05	4
chr15	60119895	60120295	DAR_546	7.29077213248845e-08	1.25928726648093e-05	4
chr11	82954647	82955047	DAR_547	7.46999283928843e-08	1.28188572386812e-05	4
chr2	157119102	157119502	DAR_548	7.47170412053091e-08	1.28188572386812e-05	4
chr11	52314333	52314733	DAR_549	7.4759789636768e-08	1.28188572386812e-05	2
chr11	33767223	33767623	DAR_550	7.57246495764818e-08	1.29607341698898e-05	1
chr1	161693750	161694150	DAR_551	7.61959314166755e-08	1.30177712031022e-05	3
chr11	54151109	54151509	DAR_552	7.69055166044263e-08	1.31152415088854e-05	4
chr10	85388743	85389143	DAR_553	7.81383183017953e-08	1.33014266860784e-05	4
chr9	95316740	95317140	DAR_554	7.84771547417206e-08	1.33350360941035e-05	4
chr8	113656123	113656523	DAR_555	7.91225015681306e-08	1.34205139485354e-05	3
chr1	88641810	88642210	DAR_556	7.92876939870878e-08	1.34243887914547e-05	4
chr10	60381124	60381524	DAR_557	8.00216712743643e-08	1.35243794854327e-05	4
chr13	13572045	13572445	DAR_558	8.10036249710556e-08	1.36624531436802e-05	4
chr14	76217093	76217493	DAR_559	8.1128376053325e-08	1.36624531436802e-05	4
chr15	89282534	89282934	DAR_560	8.13260231708802e-08	1.36713248969273e-05	4
chr11	6679696	6680096	DAR_561	8.31862776195941e-08	1.39591606467457e-05	4
chr7	24430949	24431349	DAR_562	8.46424348867788e-08	1.41782843816473e-05	4
chr11	11741699	11742099	DAR_563	8.58408269738301e-08	1.43535299103209e-05	4
chr11	52265575	52265975	DAR_564	8.70444462229945e-08	1.45290275928353e-05	2
chr16	10668888	10669288	DAR_565	8.78494416787041e-08	1.46374863893879e-05	4
chr18	84302468	84302868	DAR_566	8.8890854452042e-08	1.47848850278814e-05	4
chr14	99298404	99298804	DAR_567	8.95555059378279e-08	1.48692096804203e-05	2
chr14	21112762	21113162	DAR_568	9.22635410544005e-08	1.5291911715672e-05	4
chr12	99576710	99577110	DAR_569	9.50254422571658e-08	1.57220427770992e-05	4
chr12	107996186	107996586	DAR_570	9.68890152634019e-08	1.60022983580484e-05	4
chr14	65044545	65044945	DAR_571	9.79665595697981e-08	1.61519796037569e-05	4
chr4	155050078	155050478	DAR_572	9.83260369297114e-08	1.61829556103496e-05	4
chr3	88234050	88234450	DAR_573	9.86792848858579e-08	1.62128002085899e-05	3
chr9	118396496	118396896	DAR_574	9.96090740152249e-08	1.63103662037661e-05	4
chr18	32940780	32941180	DAR_575	9.96190201508827e-08	1.63103662037661e-05	4
chr13	93898476	93898876	DAR_576	1.00775523724477e-07	1.64711218646175e-05	4
chr15	99335897	99336297	DAR_577	1.01041681811559e-07	1.6486051706925e-05	4
chr17	52178003	52178403	DAR_578	1.01572073875486e-07	1.65439681709421e-05	4
chr5	146861626	146862026	DAR_579	1.03536276937709e-07	1.68348201192492e-05	1
chr5	113825555	113825955	DAR_580	1.05104957666727e-07	1.70604702972049e-05	4
chr7	43438644	43439044	DAR_581	1.13359856501089e-07	1.83687766100485e-05	4
chr11	63991976	63992376	DAR_582	1.14114497753492e-07	1.84593412343715e-05	4
chr3	101066186	101066586	DAR_583	1.14604782257781e-07	1.8506906165042e-05	4
chr18	82782919	82783319	DAR_584	1.16105889952259e-07	1.8717261818338e-05	2
chr17	79093251	79093651	DAR_585	1.16584266807924e-07	1.87623079349059e-05	4
chr14	27384162	27384562	DAR_586	1.18229209763592e-07	1.89946202473169e-05	4
chr9	88380103	88380503	DAR_587	1.19198351102639e-07	1.9117753226933e-05	4
chr1	136694958	136695358	DAR_588	1.21880691937414e-07	1.95147748973544e-05	4
chr13	112418610	112419010	DAR_589	1.22159928675979e-07	1.95263328705856e-05	4
chr5	148486134	148486534	DAR_590	1.22706450337835e-07	1.95805028968023e-05	2
chr2	114144875	114145275	DAR_591	1.2339111068432e-07	1.96564957353145e-05	4
chr10	19577556	19577956	DAR_592	1.2496777365087e-07	1.98740907751983e-05	4
chr5	74402658	74403058	DAR_593	1.25923643483166e-07	1.99923923332777e-05	4
chr16	93574494	93574894	DAR_594	1.26201261382958e-07	2.00027938777188e-05	4
chr4	47838437	47838837	DAR_595	1.28626869041598e-07	2.03530438568892e-05	4
chr13	41948242	41948642	DAR_596	1.30014739067665e-07	2.05381909501747e-05	4
chr6	142507790	142508190	DAR_597	1.31065265764358e-07	2.06695184254838e-05	4
chr19	18619088	18619488	DAR_598	1.3254145520129e-07	2.08674240662238e-05	2
chr3	115972142	115972542	DAR_599	1.33203772564504e-07	2.09367469654011e-05	4
chr6	136743730	136744130	DAR_600	1.33907732281855e-07	2.10123735579116e-05	4
chr5	35165989	35166389	DAR_601	1.34325305368821e-07	2.10428846734508e-05	4
chr13	97406732	97407132	DAR_602	1.36504463644124e-07	2.13488000877055e-05	4
chr16	91443253	91443653	DAR_603	1.3717521154251e-07	2.14181832366548e-05	4
chr2	11254438	11254838	DAR_604	1.37639762497232e-07	2.14551951765726e-05	4
chr15	78614522	78614922	DAR_605	1.41665794316105e-07	2.20463301395527e-05	2
chr10	56115157	56115557	DAR_606	1.42885426582067e-07	2.21994990521828e-05	2
chr5	34198692	34199092	DAR_607	1.43423298403982e-07	2.22464161226715e-05	4
chr4	32291410	32291810	DAR_608	1.45330068640637e-07	2.25051605636989e-05	4
chr11	121039304	121039704	DAR_609	1.50078611651088e-07	2.32023993917691e-05	4
chr2	131491668	131492068	DAR_610	1.50774059685218e-07	2.32717663612665e-05	1
chr9	107280324	107280724	DAR_611	1.52758497417173e-07	2.3539535320133e-05	4
chr5	73236981	73237381	DAR_612	1.53926290114517e-07	2.36807938692166e-05	4
chr12	107921157	107921557	DAR_613	1.55440442711017e-07	2.38747912552897e-05	4
chr7	58392381	58392781	DAR_614	1.57556430098032e-07	2.41604459402522e-05	4
chr8	4313616	4314016	DAR_615	1.58246627262049e-07	2.42268907097435e-05	4
chr18	32598082	32598482	DAR_616	1.64624917046274e-07	2.51625316886272e-05	4
chr5	74132683	74133083	DAR_617	1.65217039655949e-07	2.52121737197954e-05	4
chr1	66552614	66553014	DAR_618	1.65489047393412e-07	2.52128846405986e-05	4
chr12	17486373	17486773	DAR_619	1.66196651013707e-07	2.52798509147575e-05	2
chr12	107729275	107729675	DAR_620	1.67893340910923e-07	2.54856190474006e-05	4
chr7	55960539	55960939	DAR_621	1.68089908993852e-07	2.54856190474006e-05	4
chr15	78493578	78493978	DAR_622	1.68408876343325e-07	2.54902986660625e-05	3
chr3	115894491	115894891	DAR_623	1.68661354593222e-07	2.54902986660625e-05	4
chr3	95666114	95666514	DAR_624	1.69643451992126e-07	2.55977040432342e-05	4
chr6	87750220	87750620	DAR_625	1.70454739360952e-07	2.5679033713919e-05	1
chr7	123326919	123327319	DAR_626	1.74650775871476e-07	2.6269203700337e-05	1
chr7	127220427	127220827	DAR_627	1.78850066575617e-07	2.68579828480043e-05	2
chr12	107720948	107721348	DAR_628	1.83483557637737e-07	2.75099902545978e-05	4
chr7	112225619	112226019	DAR_629	1.84628496413052e-07	2.76230443106482e-05	2
chr12	70940802	70941202	DAR_630	1.84925616067523e-07	2.76230443106482e-05	4
chr1	128016088	128016488	DAR_631	1.85116311666468e-07	2.76230443106482e-05	4
chr14	57616599	57616999	DAR_632	1.87718186136631e-07	2.79492512387807e-05	4
chr15	12895478	12895878	DAR_633	1.87895122158344e-07	2.79492512387807e-05	4
chr11	116848134	116848534	DAR_634	1.88583439983802e-07	2.80074621646495e-05	4
chr2	173455176	173455576	DAR_635	1.92085693479751e-07	2.84827444889856e-05	4
chr12	80273084	80273484	DAR_636	1.95909702539439e-07	2.90041700429935e-05	4
chr11	76805962	76806362	DAR_637	1.9651211073567e-07	2.90477549014871e-05	1
chr4	44271085	44271485	DAR_638	2.00250491926876e-07	2.95540268265225e-05	4
chr1	92831158	92831558	DAR_639	2.01770928111274e-07	2.97096345603867e-05	2
chr4	44022262	44022662	DAR_640	2.01948990456729e-07	2.97096345603867e-05	4
chr3	35318298	35318698	DAR_641	2.02249943140681e-07	2.97096345603867e-05	4
chr2	59339725	59340125	DAR_642	2.0361443569593e-07	2.98635561231355e-05	4
chr4	19928192	19928592	DAR_643	2.04301785900848e-07	2.99178393213529e-05	4
chr6	142952490	142952890	DAR_644	2.05282368586769e-07	3.00148284252906e-05	4
chr16	46006217	46006617	DAR_645	2.06528971816026e-07	3.01387708189923e-05	4
chr6	108835828	108836228	DAR_646	2.06769218826683e-07	3.01387708189923e-05	3
chr10	122679691	122680091	DAR_647	2.07706995038537e-07	3.02287400942891e-05	4
chr16	37916725	37917125	DAR_648	2.12338253850225e-07	3.08551366808216e-05	4
chr9	80317965	80318365	DAR_649	2.15356737884381e-07	3.12201680747789e-05	4
chr1	133856152	133856552	DAR_650	2.15512416010276e-07	3.12201680747789e-05	4
chr6	41605225	41605625	DAR_651	2.18345316720783e-07	3.15820426134768e-05	4
chr12	73687048	73687448	DAR_652	2.2083644054811e-07	3.18781171905897e-05	4
chr15	80149603	80150003	DAR_653	2.21068305031924e-07	3.18781171905897e-05	4
chr11	88073328	88073728	DAR_654	2.21413426560403e-07	3.18791389597435e-05	4
chr7	90355476	90355876	DAR_655	2.22481497874825e-07	3.19840893598798e-05	4
chr16	52007034	52007434	DAR_656	2.2790768032621e-07	3.27035257910248e-05	4
chr5	124906857	124907257	DAR_657	2.28436465523617e-07	3.27035257910248e-05	4
chr11	100897429	100897829	DAR_659	2.29061316259578e-07	3.2730432655291e-05	3
chr16	10585197	10585597	DAR_660	2.29554412123781e-07	3.27512676916149e-05	4
chr17	56163775	56164175	DAR_661	2.30456351629915e-07	3.28274056380672e-05	4
chr11	113190555	113190955	DAR_662	2.3078424653566e-07	3.28274056380672e-05	4
chr9	62353803	62354203	DAR_663	2.33465265253148e-07	3.31587481479347e-05	1
chr11	107458271	107458671	DAR_665	2.4035268551821e-07	3.40344455152639e-05	4
chr11	63020608	63021008	DAR_666	2.42752173111896e-07	3.43226824432737e-05	2
chr2	26622944	26623344	DAR_667	2.45700133643016e-07	3.46781296008973e-05	4
chr14	99449884	99450284	DAR_668	2.46001555589726e-07	3.46781296008973e-05	4
chr5	77144643	77145043	DAR_669	2.47327609423914e-07	3.48130221820015e-05	4
chr14	18233862	18234262	DAR_670	2.51747552186502e-07	3.53823493353986e-05	4
chr12	17726460	17726860	DAR_671	2.52290216449371e-07	3.54058533373376e-05	4
chr10	19188424	19188824	DAR_672	2.54921599720639e-07	3.57207734138876e-05	2
chr1	189922160	189922560	DAR_674	2.56087063367511e-07	3.57789669407405e-05	2
chr15	51798619	51799019	DAR_675	2.57746880620636e-07	3.59575962584177e-05	4
chr11	115198871	115199271	DAR_676	2.6424251463074e-07	3.68093335705779e-05	1
chr14	78679016	78679416	DAR_677	2.71483237725409e-07	3.77621971978911e-05	2
chr15	9580898	9581298	DAR_678	2.72129964990713e-07	3.77964073761107e-05	4
chr6	59426175	59426575	DAR_679	2.76792714086999e-07	3.83311167215897e-05	4
chr2	31727766	31728166	DAR_680	2.77769823963441e-07	3.84100275491499e-05	4
chr12	107645481	107645881	DAR_681	2.78819590730827e-07	3.84987395945126e-05	4
chr2	27740237	27740637	DAR_682	2.79418588004696e-07	3.85250420745012e-05	1
chr17	35763935	35764335	DAR_683	2.89119371345299e-07	3.9804351172936e-05	4
chr9	110916795	110917195	DAR_684	2.89653682410374e-07	3.98197810890308e-05	4
chr12	3548492	3548892	DAR_685	2.90613925430513e-07	3.98936353210705e-05	4
chr3	52643801	52644201	DAR_686	2.91369644772748e-07	3.99392399557901e-05	4
chr6	125367749	125368149	DAR_687	2.95048557197014e-07	4.03383135669182e-05	2
chr7	80449902	80450302	DAR_688	NA	NA	4
chr4	86886158	86886558	DAR_689	3.00760383319833e-07	4.10474811428994e-05	2
chr15	101362616	101363016	DAR_690	3.0804974582737e-07	4.19815713580083e-05	1
chr9	66883480	66883880	DAR_691	3.09450839751019e-07	4.21116599486282e-05	4
chr13	93072940	93073340	DAR_692	3.11537912002247e-07	4.23345905867376e-05	4
chr8	116590487	116590887	DAR_693	3.15867853854996e-07	4.286122258058e-05	4
chr14	64037545	64037945	DAR_694	3.19091652464002e-07	4.32364604438543e-05	2
chr15	32265384	32265784	DAR_695	3.25126805879215e-07	4.3991009586874e-05	2
chr3	106485819	106486219	DAR_696	3.26529818217191e-07	4.41175466570324e-05	4
chr3	101407548	101407948	DAR_697	3.30034806348645e-07	4.45273139947377e-05	4
chr12	84220534	84220934	DAR_698	3.34792156097462e-07	4.51046340929762e-05	4
chr15	93518868	93519268	DAR_699	3.36106654206994e-07	4.52171330075592e-05	2
chr15	94255086	94255486	DAR_700	3.40071129404566e-07	4.56853105423881e-05	4
chr6	135418372	135418772	DAR_701	NA	NA	4
chr11	94275666	94276066	DAR_702	3.42111519782421e-07	4.58288509888079e-05	4
chr1	94091780	94092180	DAR_703	3.42773733534119e-07	4.58524290615633e-05	4
chr9	54699316	54699716	DAR_704	3.43932642867921e-07	4.59422885990722e-05	4
chr10	88405800	88406200	DAR_705	3.46098309637301e-07	4.61661856958486e-05	1
chr1	173432307	173432707	DAR_706	3.48203581333097e-07	4.63814055717237e-05	4
chr6	40890979	40891379	DAR_707	3.4985474846905e-07	4.65356160280264e-05	4
chr8	123027759	123028159	DAR_708	3.52579429587933e-07	4.68319834734496e-05	1
chr7	73589495	73589895	DAR_709	3.55402105831773e-07	4.7074306734097e-05	4
chr2	76215225	76215625	DAR_710	3.58576551673914e-07	4.73617350962351e-05	4
chr9	52341673	52342073	DAR_711	3.65802573453467e-07	4.82485920205261e-05	1
chr2	68430493	68430893	DAR_712	3.73184702645282e-07	4.91535331736991e-05	4
chr2	127927692	127928092	DAR_713	3.7824995825533e-07	4.97512117338709e-05	2
chr17	29428779	29429179	DAR_714	3.79700956857526e-07	4.98059259080742e-05	4
chr6	134414165	134414565	DAR_715	3.79722191649669e-07	4.98059259080742e-05	2
chr13	30742491	30742891	DAR_716	3.81826487326853e-07	5.00123757504633e-05	4
chr19	14695367	14695767	DAR_717	3.84483311387114e-07	5.02633498786266e-05	2
chr9	52280997	52281397	DAR_718	3.84808536082882e-07	5.02633498786266e-05	4
chr16	92818458	92818858	DAR_719	3.89650965485657e-07	5.08254683292612e-05	1
chr17	29552273	29552673	DAR_720	4.02773674325954e-07	5.24646089843339e-05	4
chr5	67395355	67395755	DAR_721	4.10845706540549e-07	5.34422428230615e-05	4
chr6	38345805	38346205	DAR_722	4.13217797609496e-07	5.36767642412655e-05	4
chr4	102967790	102968190	DAR_723	4.20794819891587e-07	5.45858281698981e-05	4
chr4	150808405	150808805	DAR_724	4.33092508760627e-07	5.60754086560565e-05	4
chr17	84844915	84845315	DAR_725	4.33467005739396e-07	5.60754086560565e-05	2
chr9	32910532	32910932	DAR_726	4.3553482633652e-07	5.62657299552304e-05	4
chr1	88622430	88622830	DAR_727	4.39570713951399e-07	5.66349705636569e-05	4
chr9	14908014	14908414	DAR_728	4.39594075228741e-07	5.66349705636569e-05	4
chr1	92130439	92130839	DAR_729	4.46072437042397e-07	5.73434025317346e-05	4
chr17	84032435	84032835	DAR_730	4.46458217355806e-07	5.73434025317346e-05	4
chr6	140722081	140722481	DAR_731	4.46916993020931e-07	5.73434025317346e-05	4
chr13	52636218	52636618	DAR_732	4.54657631976408e-07	5.81992617104524e-05	3
chr1	89070036	89070436	DAR_733	4.54821549626257e-07	5.81992617104524e-05	1
chr14	99449084	99449484	DAR_734	4.55730721570087e-07	5.82365815164095e-05	4
chr19	10731933	10732333	DAR_735	4.62390080610586e-07	5.90076066740765e-05	4
chr9	75630715	75631115	DAR_736	4.6935720949494e-07	5.98157707511342e-05	1
chr15	36640726	36641126	DAR_737	4.71324449956405e-07	5.99854182213747e-05	4
chr11	108910912	108911312	DAR_738	4.75653010915265e-07	6.04547284371777e-05	4
chr11	100845834	100846234	DAR_739	4.88128367091751e-07	6.19568262655744e-05	4
chr5	134444386	134444786	DAR_740	4.9134062615291e-07	6.22807263852184e-05	4
chr3	115933606	115934006	DAR_741	4.99276429244368e-07	6.32016942453001e-05	4
chr2	114233139	114233539	DAR_742	5.01897087450432e-07	6.34482689359086e-05	4
chr6	54766467	54766867	DAR_743	5.08571639347321e-07	6.42059780347092e-05	4
chr1	54421693	54422093	DAR_744	5.12398704872948e-07	6.46026532893758e-05	4
chr18	81210851	81211251	DAR_745	5.17034734108879e-07	6.51001263946676e-05	4
chr16	94185379	94185779	DAR_746	5.19493577810508e-07	6.53225077901008e-05	2
chr9	14859930	14860330	DAR_747	5.45255498986445e-07	6.84705863420967e-05	4
chr12	100164952	100165352	DAR_748	NA	NA	4
chr1	134510006	134510406	DAR_749	5.49995182015032e-07	6.8795773320623e-05	4
chr2	131480656	131481056	DAR_750	5.50482027409113e-07	6.8795773320623e-05	4
chr2	68435810	68436210	DAR_751	5.50763027739938e-07	6.8795773320623e-05	4
chr14	73175724	73176124	DAR_752	5.64084722757849e-07	7.0366584588789e-05	2
chr17	32880427	32880827	DAR_753	5.71373411183635e-07	7.11273609132507e-05	4
chr12	100544164	100544564	DAR_754	5.71691810493855e-07	7.11273609132507e-05	4
chr19	10747731	10748131	DAR_755	5.79896260734675e-07	7.20530654296508e-05	4
chr14	121898562	121898962	DAR_756	5.82569922800688e-07	7.22900285652164e-05	2
chr6	99428825	99429225	DAR_757	5.9145865140834e-07	7.329657166671e-05	4
chr3	131157409	131157809	DAR_758	5.95264007455672e-07	7.36410296695153e-05	4
chr3	37483836	37484236	DAR_759	5.95799947382911e-07	7.36410296695153e-05	4
chr3	103384989	103385389	DAR_760	6.02695763479144e-07	7.43958499560571e-05	4
chr16	36655890	36656290	DAR_761	6.06911448321728e-07	7.4818297982846e-05	2
chr1	61135582	61135982	DAR_762	6.14606032848894e-07	7.56679518797397e-05	4
chr1	184477985	184478385	DAR_763	6.18122872870402e-07	7.60017128706506e-05	4
chr2	68466042	68466442	DAR_764	6.25717180373839e-07	7.68352996478068e-05	4
chr1	54493495	54493895	DAR_765	6.27619708852819e-07	7.69687020582351e-05	4
chr9	115561190	115561590	DAR_766	6.284669035845e-07	7.69725042549915e-05	4
chr11	3344876	3345276	DAR_767	6.33837560261422e-07	7.75295963626121e-05	4
chr2	117390038	117390438	DAR_768	6.43146934777732e-07	7.85167237697238e-05	4
chr16	97845516	97845916	DAR_769	6.43572878725826e-07	7.85167237697238e-05	1
chr5	115716413	115716813	DAR_770	6.45726662246022e-07	7.86777058610279e-05	2
chr7	78597709	78598109	DAR_771	6.53271810580838e-07	7.94943285683188e-05	4
chr11	86811016	86811416	DAR_772	6.6397118147323e-07	8.06921781072113e-05	4
chr4	32363638	32364038	DAR_773	6.66367050024266e-07	8.08791214757251e-05	2
chr8	34945104	34945504	DAR_774	6.67716204287292e-07	8.09387044700792e-05	4
chr2	29097465	29097865	DAR_775	6.69168051977327e-07	8.10105667237814e-05	4
chr4	141454551	141454951	DAR_776	6.75344525191254e-07	8.16534822271944e-05	4
chr7	109951252	109951652	DAR_777	6.7716840927194e-07	8.17213462771867e-05	2
chr3	30864626	30865026	DAR_778	6.77803015216875e-07	8.17213462771867e-05	2
chr7	135646934	135647334	DAR_779	6.78505457018431e-07	8.17213462771867e-05	4
chr12	85624622	85625022	DAR_780	6.83123123987065e-07	8.21725669054186e-05	2
chr7	43544413	43544813	DAR_781	NA	NA	4
chr11	46380257	46380657	DAR_782	6.92843752778009e-07	8.31297910855416e-05	4
chr17	73162900	73163300	DAR_783	7.03358796770694e-07	8.42537035282008e-05	1
chr6	142887405	142887805	DAR_784	7.045037300734e-07	8.42537035282008e-05	4
chr4	145249998	145250398	DAR_785	7.04891175456227e-07	8.42537035282008e-05	4
chr5	67393946	67394346	DAR_786	7.11718824256671e-07	8.49621103280682e-05	4
chr7	83609939	83610339	DAR_787	7.1530858420334e-07	8.52826885593735e-05	4
chr11	72153334	72153734	DAR_788	NA	NA	4
chr5	64651415	64651815	DAR_790	7.44100331359878e-07	8.83801888533451e-05	4
chr1	153087770	153088170	DAR_791	7.4664405836643e-07	8.85707688205822e-05	4
chr17	30046658	30047058	DAR_792	7.50469122209405e-07	8.89126777741236e-05	4
chr4	57640219	57640619	DAR_793	7.69428965485863e-07	9.1044589018915e-05	4
chr12	21480256	21480656	DAR_794	7.74029163055417e-07	9.14741457146206e-05	2
chr13	95988125	95988525	DAR_795	7.77253925054298e-07	9.17402827410459e-05	4
chr16	93552647	93553047	DAR_796	7.8258285532393e-07	9.22538016712924e-05	4
chr13	97559657	97560057	DAR_797	7.85946650989622e-07	9.25346701808718e-05	4
chr4	86712650	86713050	DAR_798	8.01316369829304e-07	9.42266120816611e-05	4
chr10	61306219	61306619	DAR_799	8.03727521594875e-07	9.43184389839299e-05	4
chr5	114505311	114505711	DAR_800	8.04097521319516e-07	9.43184389839299e-05	4
chr13	93894089	93894489	DAR_801	8.07422132461122e-07	9.45547997357398e-05	4
chr2	51376628	51377028	DAR_802	8.08117834169322e-07	9.45547997357398e-05	4
chr7	128119764	128120164	DAR_803	8.15607063908643e-07	9.53128319405606e-05	4
chr19	47510784	47511184	DAR_804	8.25819926774663e-07	9.62778799124841e-05	2
chr2	163253186	163253586	DAR_805	8.25906930017916e-07	9.62778799124841e-05	1
chr6	82939572	82939972	DAR_806	8.30885403924314e-07	9.66822839137287e-05	2
chr15	36562754	36563154	DAR_807	8.31572802667823e-07	9.66822839137287e-05	4
chr8	119946307	119946707	DAR_808	8.32451615871014e-07	9.66822839137287e-05	4
chr17	84434456	84434856	DAR_809	8.36458003219263e-07	9.7028099519802e-05	2
chr9	110946648	110947048	DAR_810	8.47789968975599e-07	9.81723050810553e-05	4
chr7	46833236	46833636	DAR_811	8.48403921671351e-07	9.81723050810553e-05	4
chr17	51800276	51800676	DAR_812	8.49990623468979e-07	9.82353746660405e-05	4
chr3	135665904	135666304	DAR_813	8.5228169938737e-07	9.83795963575578e-05	2
chr12	75766856	75767256	DAR_814	8.63690880694444e-07	9.95746893467615e-05	4
chr16	46008781	46009181	DAR_815	8.667947467952e-07	9.98105154896397e-05	4
chr11	52341025	52341425	DAR_816	8.74768430635247e-07	0.000100605837058437	4
chr1	152038078	152038478	DAR_817	8.79142568817108e-07	0.000100985746939628	4
chr5	129790572	129790972	DAR_818	8.8528526150802e-07	0.000101567636444084	4
chr10	75536129	75536529	DAR_819	8.86991500196174e-07	0.000101639741687729	4
chr3	108865635	108866035	DAR_820	8.94378578306242e-07	0.000102361845369329	4
chr9	48450053	48450453	DAR_821	8.9550566518316e-07	0.000102366609413852	4
chr13	45649144	45649544	DAR_822	9.1102988659024e-07	0.000104015127741726	3
chr8	25625343	25625743	DAR_823	9.18019716068607e-07	0.00010468643937519	4
chr6	140614771	140615171	DAR_824	9.4321773459592e-07	0.000107429993836398	4
chr5	118047091	118047491	DAR_825	9.46722647800777e-07	0.0001076485137191	4
chr4	150940137	150940537	DAR_826	9.47419241274276e-07	0.0001076485137191	4
chr1	82819203	82819603	DAR_827	9.50778631415774e-07	0.000107900217079335	4
chr1	40002203	40002603	DAR_828	9.61945845649644e-07	0.000109036330367405	1
chr1	69687290	69687690	DAR_829	9.65721783411874e-07	0.000109332922242765	4
chr12	28808681	28809081	DAR_830	9.69705645285141e-07	0.00010965231449629	4
chr1	88553522	88553922	DAR_831	9.86765271538092e-07	0.000111394508756355	4
chr10	93227920	93228320	DAR_832	9.87475047666797e-07	0.000111394508756355	4
chr8	124275678	124276078	DAR_833	9.98882276127381e-07	0.000112546703482371	4
chr8	13974810	13975210	DAR_834	1.00033934615083e-06	0.000112576375557812	4
chr13	53001406	53001806	DAR_835	1.01241647770742e-06	0.000113711545481113	4
chr10	19171791	19172191	DAR_836	1.01361709636021e-06	0.000113711545481113	4
chr6	40439733	40440133	DAR_837	1.01404359962268e-06	0.000113711545481113	4
chr16	11456280	11456680	DAR_838	1.026304181081e-06	0.000114949724946801	1
chr5	24776768	24777168	DAR_839	1.03339213877903e-06	0.000115412312533695	4
chr17	12745801	12746201	DAR_840	1.03410231138513e-06	0.000115412312533695	4
chr4	135520435	135520835	DAR_841	1.03410567710745e-06	0.000115412312533695	4
chr6	120799584	120799984	DAR_842	NA	NA	4
chr8	64826389	64826789	DAR_843	1.04353873662677e-06	0.000116190091658868	4
chr5	140872575	140872975	DAR_844	1.05358548487559e-06	0.000117041834643481	4
chr14	64272154	64272554	DAR_845	1.05367064599993e-06	0.000117041834643481	4
chr13	93593311	93593711	DAR_846	1.07839650933358e-06	0.000119647458359673	4
chr11	52309437	52309837	DAR_847	1.09137562648038e-06	0.000120945195307268	4
chr12	73382266	73382666	DAR_848	1.09994936892241e-06	0.000121752259548082	4
chr9	20765294	20765694	DAR_849	1.12027759529345e-06	0.000123856997865579	2
chr1	88584577	88584977	DAR_851	1.12907478019309e-06	0.000124537608532947	4
chr5	103367114	103367514	DAR_852	1.13146229649051e-06	0.000124655157470947	4
chr1	131003321	131003721	DAR_853	1.13701584456621e-06	0.000125111294484929	3
chr14	18893610	18894010	DAR_854	1.13825580994061e-06	0.000125111294484929	4
chr8	86856266	86856666	DAR_855	1.14967763583007e-06	0.000126115823149609	3
chr16	46120025	46120425	DAR_856	1.15006953787804e-06	0.000126115823149609	4
chr11	100823905	100824305	DAR_857	1.16965444921247e-06	0.000128008875050291	2
chr1	131046554	131046954	DAR_858	1.17004729546429e-06	0.000128008875050291	3
chr5	43355190	43355590	DAR_859	1.17493791141125e-06	0.000128394982168553	2
chr13	73709579	73709979	DAR_860	1.18731129956819e-06	0.000129596952231919	4
chr9	56325707	56326107	DAR_861	1.19585511871535e-06	0.000130378622752241	4
chr17	84758353	84758753	DAR_862	1.22057260696534e-06	0.000132919793123649	2
chr6	83572299	83572699	DAR_863	1.23091077962926e-06	0.000133891006798727	2
chr8	22814173	22814573	DAR_865	1.24113307512531e-06	0.000134692217394525	4
chr19	12833601	12834001	DAR_866	1.25455810617329e-06	0.000135992656688373	4
chr3	89870959	89871359	DAR_867	1.26031660497864e-06	0.000136460020741355	2
chr5	124637243	124637643	DAR_868	1.26482576842709e-06	0.000136791196953043	1
chr1	88644432	88644832	DAR_869	1.28468535964129e-06	0.00013871733123778	4
chr1	52650043	52650443	DAR_870	1.28557739618289e-06	0.00013871733123778	4
chr1	153723413	153723813	DAR_871	1.28725949295622e-06	0.000138740092573968	4
chr5	74260254	74260654	DAR_872	1.3390900890525e-06	0.000144161608479765	4
chr3	115819407	115819807	DAR_873	1.3412239783361e-06	0.000144226692958886	1
chr2	11118626	11119026	DAR_874	1.34467517967965e-06	0.000144433123200512	4
chr10	21252162	21252562	DAR_875	1.36014060591684e-06	0.000145928077499658	4
chr2	117441021	117441421	DAR_876	1.36388068022798e-06	0.000146163062852568	4
chr11	115463523	115463923	DAR_877	1.3803241487067e-06	0.000147757354701569	4
chr2	18920296	18920696	DAR_878	1.38366711930324e-06	0.000147825201556275	4
chr1	39280960	39281360	DAR_879	1.38545477909397e-06	0.000147825201556275	4
chr18	76892293	76892693	DAR_880	1.38566043003963e-06	0.000147825201556275	4
chr17	31325905	31326305	DAR_881	1.40743136596741e-06	0.000149808837280236	4
chr12	112870787	112871187	DAR_882	1.41154323885786e-06	0.000150077123142016	4
chr11	107668190	107668590	DAR_883	1.41750638856721e-06	0.000150541413273207	4
chr13	93990258	93990658	DAR_884	1.42386120674613e-06	0.000151001602585654	4
chr1	183180264	183180664	DAR_885	1.42622204699632e-06	0.000151001602585654	4
chr8	94454017	94454417	DAR_886	1.42664306895371e-06	0.000151001602585654	4
chr3	96882056	96882456	DAR_887	1.43879085373293e-06	0.000152116646909183	4
chr11	32535602	32536002	DAR_888	1.44646970885182e-06	0.000152757243933581	4
chr11	76807039	76807439	DAR_889	1.45617833184705e-06	0.000153610525661633	1
chr17	25219482	25219882	DAR_890	1.46352025279224e-06	0.000154212518972154	4
chr11	57669535	57669935	DAR_891	1.46988959947449e-06	0.000154710801850046	4
chr15	36336851	36337251	DAR_892	1.50488934526213e-06	0.000158041870249038	4
chr7	127628657	127629057	DAR_893	1.50818570159457e-06	0.000158134687741713	4
chr12	103273064	103273464	DAR_894	1.50912677709547e-06	0.000158134687741713	1
chr15	79956478	79956878	DAR_895	1.51754451014441e-06	0.000158840255403095	4
chr2	59646798	59647198	DAR_896	1.53024937983107e-06	0.000159843393190617	4
chr9	62421094	62421494	DAR_897	1.53051824415077e-06	0.000159843393190617	4
chr9	96353361	96353761	DAR_898	1.53384488847985e-06	0.000160013617143661	4
chr2	69380284	69380684	DAR_899	1.53677656545918e-06	0.000160142306694762	2
chr1	90222066	90222466	DAR_900	1.54736609327481e-06	0.000161067830196984	2
chr15	78576462	78576862	DAR_901	1.56242166050865e-06	0.000162455677549712	4
chr8	35597055	35597455	DAR_902	1.56870060572458e-06	0.000162875795559677	3
chr7	90341521	90341921	DAR_903	1.56991631759834e-06	0.000162875795559677	4
chr6	82872307	82872707	DAR_904	1.57501666519455e-06	0.000163225380928024	4
chr17	85218101	85218501	DAR_905	1.58576523548367e-06	0.000164158904569438	1
chr17	70985974	70986374	DAR_906	1.58814220903666e-06	0.000164224700995198	4
chr15	73268217	73268617	DAR_907	1.61293833876216e-06	0.000166606107243858	4
chr12	89719191	89719591	DAR_908	1.61490657436933e-06	0.000166626908434407	4
chr12	117077676	117078076	DAR_909	1.62216343590539e-06	0.000167192750983529	2
chr4	150517421	150517821	DAR_910	1.62736510076295e-06	0.00016754576480093	4
chr5	100651500	100651900	DAR_911	1.65571492388612e-06	0.000170278633944306	4
chr9	118390713	118391113	DAR_912	1.67224558785343e-06	0.000171491853256239	4
chr4	32405997	32406397	DAR_913	1.67283416404775e-06	0.000171491853256239	1
chr5	67419508	67419908	DAR_914	1.67315837585543e-06	0.000171491853256239	4
chr6	17542393	17542793	DAR_915	1.67478550742783e-06	0.000171491853256239	4
chr12	28835671	28836071	DAR_916	1.68365040735132e-06	0.000172212601915489	4
chr12	73631139	73631539	DAR_917	1.71253729641183e-06	0.000174977524174118	4
chr2	11159639	11160039	DAR_918	1.72985174806536e-06	0.000176555334204329	4
chr6	119109067	119109467	DAR_919	1.74587709592586e-06	0.000177998304092411	2
chr7	120693982	120694382	DAR_920	1.77757053388446e-06	0.000181033849178231	4
chr2	105021918	105022318	DAR_921	1.7832069419604e-06	0.000181411970955188	4
chr6	50455721	50456121	DAR_922	1.79720566714146e-06	0.000182639089279213	1
chr13	95956500	95956900	DAR_923	1.8074469283763e-06	0.000183482128605364	4
chr6	125483440	125483840	DAR_924	1.8115711283794e-06	0.000183703052047394	1
chr5	67418572	67418972	DAR_925	1.82189536985069e-06	0.000184359962912499	4
chr3	65663089	65663489	DAR_926	1.82195897902011e-06	0.000184359962912499	2
chr17	17910081	17910481	DAR_927	1.82979044869668e-06	0.000184822287178897	3
chr1	130993710	130994110	DAR_928	1.83044754074554e-06	0.000184822287178897	3
chr11	106167394	106167794	DAR_929	1.85288489570042e-06	0.000186887717496063	2
chr1	72208137	72208537	DAR_930	1.86896523233498e-06	0.000188308230946383	1
chr14	60709191	60709591	DAR_931	1.87821316044108e-06	0.000188902830584325	2
chr7	142353901	142354301	DAR_932	1.87999684297334e-06	0.000188902830584325	2
chr12	104061856	104062256	DAR_933	1.88187371057196e-06	0.000188902830584325	1
chr12	15912951	15913351	DAR_934	1.88287890346703e-06	0.000188902830584325	2
chr3	103091752	103092152	DAR_935	1.88592009432718e-06	0.000188988227121891	4
chr1	54492460	54492860	DAR_936	1.88773802526665e-06	0.000188988227121891	4
chr16	95284136	95284536	DAR_937	1.89446336428071e-06	0.000189380905303593	4
chr2	58906825	58907225	DAR_938	1.89567661580362e-06	0.000189380905303593	4
chr12	82326444	82326844	DAR_939	1.94725535227878e-06	0.000194174843752154	4
chr14	120313430	120313830	DAR_940	1.94778120595012e-06	0.000194174843752154	4
chr7	43436291	43436691	DAR_941	1.96042647617708e-06	0.000195229080980815	4
chr15	6574553	6574953	DAR_942	1.96617050000641e-06	0.000195594558379857	4
chr7	76228875	76229275	DAR_943	1.96951405641658e-06	0.000195720718776058	4
chrX	50607637	50608037	DAR_944	1.97240972627069e-06	0.000195802151637273	2
chr2	167695716	167696116	DAR_945	2.00210542254292e-06	0.000198541068437177	2
chr2	71160202	71160602	DAR_946	2.01030328400883e-06	0.000199144613240568	1
chr4	150964701	150965101	DAR_947	2.01802902598102e-06	0.000199605826891617	2
chr8	115188440	115188840	DAR_948	2.01919220052172e-06	0.000199605826891617	4
chr17	44569269	44569669	DAR_949	2.02293199545562e-06	0.000199766123241291	4
chr8	26963333	26963733	DAR_950	2.04009157583087e-06	0.000201249912386906	1
chr14	70774139	70774539	DAR_951	2.05178887336118e-06	0.000202192323176669	4
chr17	84422916	84423316	DAR_952	2.05586005827953e-06	0.000202382040204768	2
chr13	55018103	55018503	DAR_953	2.06945948015032e-06	0.000203508357867087	4
chr1	60781718	60782118	DAR_954	2.08987699841674e-06	0.000205237385837102	4
chr1	161907082	161907482	DAR_955	2.09139435873748e-06	0.000205237385837102	2
chr12	88408217	88408617	DAR_956	2.09919379921424e-06	0.000205788637861223	4
chr1	85679942	85680342	DAR_957	NA	NA	4
chr16	37703851	37704251	DAR_958	2.15135212835084e-06	0.000210464279220314	4
chr7	107664311	107664711	DAR_959	2.15371594167559e-06	0.000210477190996477	3
chr2	128152826	128153226	DAR_960	2.16111085863566e-06	0.000210981244042808	3
chr18	70603184	70603584	DAR_961	2.16524976188559e-06	0.000211166710748856	4
chr12	70347177	70347577	DAR_962	2.18461367930519e-06	0.000212835084973383	2
chr11	34010695	34011095	DAR_963	2.20254901015822e-06	0.000214360979877184	2
chr8	106820518	106820918	DAR_964	2.21457900964096e-06	0.000215309590373412	1
chr13	21366638	21367038	DAR_965	2.2423675498909e-06	0.000217786772942905	4
chr1	184480753	184481153	DAR_966	2.25416056560616e-06	0.000218503842880395	2
chr9	105665607	105666007	DAR_967	2.25438450086021e-06	0.000218503842880395	4
chr11	63051045	63051445	DAR_968	2.27848530120456e-06	0.000220613052670122	4
chr5	123781852	123782252	DAR_969	2.29554059971855e-06	0.000222036458807854	4
chr9	21449826	21450226	DAR_970	2.31211697578783e-06	0.000223410671757811	4
chr5	31576574	31576974	DAR_971	2.32054324087042e-06	0.000223995364807336	2
chr13	101711266	101711666	DAR_972	2.33738202260709e-06	0.000225390067899803	4
chr10	24292658	24293058	DAR_973	2.35635312902305e-06	0.000226987328435932	4
chr1	88475417	88475817	DAR_974	2.3603452082656e-06	0.000227139873016229	4
chr2	13718771	13719171	DAR_975	2.4140186888643e-06	0.000232068155444165	2
chr12	116467037	116467437	DAR_976	2.46274622934022e-06	0.000236270812462246	4
chr1	165816367	165816767	DAR_977	2.48534667446488e-06	0.000238196736614593	4
chr5	124954647	124955047	DAR_978	2.48822732021369e-06	0.000238230714606489	4
chr4	150272800	150273200	DAR_979	2.49623810634376e-06	0.000238755301313348	1
chr17	35766405	35766805	DAR_980	2.50441339082888e-06	0.000239294542704051	2
chr14	78459100	78459500	DAR_981	2.51028912220335e-06	0.000239613194582623	4
chr8	22405725	22406125	DAR_982	2.5264261458872e-06	0.000240909676987042	4
chr6	140678602	140679002	DAR_983	2.5602288611899e-06	0.000243886366881047	2
chr1	127233070	127233470	DAR_984	2.58902245082178e-06	0.000246380363541524	1
chr7	121059514	121059914	DAR_985	2.60903113979436e-06	0.000248034173085269	4
chr4	126211822	126212222	DAR_986	2.62309109178571e-06	0.000249119689418968	4
chr12	21409638	21410038	DAR_987	2.6357539096423e-06	0.00025007046675718	4
chr2	22721820	22722220	DAR_988	2.65265710091073e-06	0.000251421239412652	2
chr1	107583883	107584283	DAR_989	2.66218163863447e-06	0.000251883571046909	2
chr7	66262821	66263221	DAR_990	2.66287677832789e-06	0.000251883571046909	4
chr11	53617187	53617587	DAR_991	2.67507174181852e-06	0.000252765027391014	2
chr9	40997084	40997484	DAR_992	2.67755587987767e-06	0.000252765027391014	4
chr7	46838783	46839183	DAR_993	2.70599309450772e-06	0.00025519409076374	4
chr12	8662157	8662557	DAR_994	2.72095713562034e-06	0.000256348955633314	4
chr8	125337469	125337869	DAR_995	2.76889420306177e-06	0.000260604895816513	4
chr14	122902104	122902504	DAR_996	2.83369302744854e-06	0.000266437775014546	4
chr10	60831409	60831809	DAR_997	2.85284116617951e-06	0.000267956987525496	2
chr2	93454360	93454760	DAR_998	2.85553323150056e-06	0.000267956987525496	4
chr13	45922564	45922964	DAR_999	2.90756660409515e-06	0.000272568472895031	2
chr4	140004185	140004585	DAR_1000	2.93559240495677e-06	0.00027492245574405	2
chr9	47734023	47734423	DAR_1001	2.95963670254115e-06	0.000276899264391417	1
chr12	85592982	85593382	DAR_1002	2.99045936882881e-06	0.000279505700392605	1
chr1	126817699	126818099	DAR_1003	3.00296892730874e-06	0.000280180777617341	1
chr9	88329328	88329728	DAR_1004	3.00362397458441e-06	0.000280180777617341	2
chr13	113635902	113636302	DAR_1005	3.00864438328744e-06	0.000280371764678547	4
chr15	80930728	80931128	DAR_1006	3.02262205945819e-06	0.000281156810510986	4
chr15	33083068	33083468	DAR_1007	3.02303122629433e-06	0.000281156810510986	4
chr2	122469088	122469488	DAR_1008	3.06152237309799e-06	0.000284456148216504	4
chr6	41541707	41542107	DAR_1009	3.08502578702814e-06	0.000286357802064235	4
chr1	182982951	182983351	DAR_1010	3.09472003618308e-06	0.000286975184318896	4
chr14	121999462	121999862	DAR_1011	3.11458485191989e-06	0.000288533549734783	4
chr7	68323045	68323445	DAR_1012	3.12942938170677e-06	0.000289624236212581	4
chr7	80445433	80445833	DAR_1013	3.13984515742131e-06	0.000290303311040128	4
chr2	102944066	102944466	DAR_1014	3.17890957329793e-06	0.000293627252819792	2
chr2	75698031	75698431	DAR_1015	3.19772952696237e-06	0.000295076593443483	4
chr5	113035150	113035550	DAR_1016	3.27867305192941e-06	0.000302250067945559	4
chr15	27668082	27668482	DAR_1017	3.28246130942452e-06	0.000302303787800682	4
chr18	65318975	65319375	DAR_1018	3.30474357166074e-06	0.000303741719468207	2
chr17	50209830	50210230	DAR_1019	3.30646769464445e-06	0.000303741719468207	1
chr6	41215841	41216241	DAR_1020	3.30773692190239e-06	0.000303741719468207	4
chr13	31503201	31503601	DAR_1021	3.36566804247878e-06	0.000308760754943625	4
chr9	34995898	34996298	DAR_1022	3.3899884715949e-06	0.00031068964313965	1
chr2	11194876	11195276	DAR_1023	3.40082583216168e-06	0.000311380273547254	4
chr2	173180898	173181298	DAR_1024	3.44047990207139e-06	0.000314705468598105	2
chr12	73842222	73842622	DAR_1025	3.44672347520446e-06	0.000314971076333437	1
chr1	90153333	90153733	DAR_1026	3.4519485901194e-06	0.000315027610971634	2
chr6	142915449	142915849	DAR_1027	3.45402302845673e-06	0.000315027610971634	2
chr8	95020650	95021050	DAR_1028	3.46259670107279e-06	0.000315504451292823	4
chr6	71357492	71357892	DAR_1029	3.47112960938172e-06	0.000315826539324249	4
chr19	10829747	10830147	DAR_1030	3.47456516363501e-06	0.000315826539324249	4
chr8	34651713	34652113	DAR_1031	3.47617830933622e-06	0.000315826539324249	4
chr13	73772591	73772991	DAR_1032	3.48523259379888e-06	0.000316060550021848	4
chr12	73699508	73699908	DAR_1033	3.48545677439344e-06	0.000316060550021848	4
chrX	50619925	50620325	DAR_1034	3.49463173283676e-06	0.000316588121833464	2
chr3	38283596	38283996	DAR_1035	3.51516779869228e-06	0.000318142926671087	4
chr3	60419218	60419618	DAR_1036	3.58805232439521e-06	0.000324428044637333	4
chr15	28081011	28081411	DAR_1037	3.62881750111916e-06	0.000327579993393222	2
chr10	94524928	94525328	DAR_1038	3.63319279415228e-06	0.000327579993393222	4
chr10	85359502	85359902	DAR_1039	3.63333234107023e-06	0.000327579993393222	4
chr1	69688993	69689393	DAR_1040	3.64448449667693e-06	0.000328271632691606	4
chr15	31222232	31222632	DAR_1041	3.65110831769313e-06	0.000328554458126608	4
chrX_GL456233_random	164037	164437	DAR_1042	3.67482274077067e-06	0.000330373220413593	4
chr17	31207948	31208348	DAR_1043	3.68844794897092e-06	0.000330827280290511	4
chr4	127033794	127034194	DAR_1044	3.69136991356845e-06	0.000330827280290511	4
chr2	59488212	59488612	DAR_1045	3.69345225105508e-06	0.000330827280290511	4
chr6	54956016	54956416	DAR_1046	3.69695479633945e-06	0.000330827280290511	1
chr14	48422074	48422474	DAR_1047	3.6974132718271e-06	0.000330827280290511	4
chr2	17730893	17731293	DAR_1048	3.7037917964395e-06	0.000331004088916268	4
chr1	36160249	36160649	DAR_1049	3.70640904594122e-06	0.000331004088916268	4
chr6	134048024	134048424	DAR_1050	3.77786581308468e-06	0.000337066406087584	4
chr11	5435523	5435923	DAR_1051	3.80491508420885e-06	0.000339019775997365	4
chr9	52181435	52181835	DAR_1052	3.80694903645763e-06	0.000339019775997365	1
chr2	11173555	11173955	DAR_1053	3.83776487332043e-06	0.000341441596139839	4
chr8	106561128	106561528	DAR_1054	3.84563937977152e-06	0.000341819710639126	4
chr3	99233870	99234270	DAR_1055	3.86467964001464e-06	0.000343188646714558	4
chr17	26370699	26371099	DAR_1056	3.87908490912224e-06	0.00034414380105794	4
chr12	73647733	73648133	DAR_1057	3.88590547023444e-06	0.00034442489396748	4
chr3	75930110	75930510	DAR_1058	3.89915638903213e-06	0.00034527487472343	4
chr11	106165214	106165614	DAR_1059	3.92242133587944e-06	0.000347009182854392	4
chr8	123806973	123807373	DAR_1060	3.93104567048671e-06	0.000347446226847789	4
chr10	30538293	30538693	DAR_1061	3.93715814188579e-06	0.000347660648770434	4
chr4	11492997	11493397	DAR_1062	3.95084104946687e-06	0.000348542532134773	4
chr16	4519163	4519563	DAR_1063	3.98284369059814e-06	0.000351037420494616	2
chr2	104732081	104732481	DAR_1064	3.9915527127478e-06	0.000351476528180305	2
chr1	136608337	136608737	DAR_1065	4.01861357943996e-06	0.000353529282496497	4
chr2	152756487	152756887	DAR_1066	4.07954274996372e-06	0.000358554928351192	2
chr18	12487809	12488209	DAR_1067	4.13287643068618e-06	0.000362717381286086	4
chr10	81247863	81248263	DAR_1068	4.15034902160628e-06	0.000363761120056342	4
chr3	87502339	87502739	DAR_1069	4.16382280946614e-06	0.000364603191914878	2
chr15	41612242	41612642	DAR_1070	4.17251578099508e-06	0.000365025459887109	2
chr15	78515709	78516109	DAR_1071	4.1959730944121e-06	0.000366737381477963	4
chr2	160366955	160367355	DAR_1072	4.24706016075751e-06	0.000370858798685702	2
chr4	9115802	9116202	DAR_1073	4.3307204388315e-06	0.000377814294565109	1
chr13	97498998	97499398	DAR_1074	4.35078329817524e-06	0.000379213789742155	4
chr6	73279635	73280035	DAR_1075	4.360127613948e-06	0.000379677336000548	4
chr18	67534551	67534951	DAR_1076	4.36694995565872e-06	0.000379737414546908	2
chr2	112510122	112510522	DAR_1077	4.36887076021287e-06	0.000379737414546908	4
chr4	59278417	59278817	DAR_1078	4.41016244071258e-06	0.000382973470806888	2
chr1	85882007	85882407	DAR_1079	4.43027347491315e-06	0.000384365961912267	3
chr2	84779191	84779591	DAR_1080	4.50002305820262e-06	0.000389960136971154	4
chr12	35578894	35579294	DAR_1081	4.50302299046292e-06	0.000389960136971154	4
chr19	46564165	46564565	DAR_1082	4.52886164191657e-06	0.000391837940242409	2
chr6	143868142	143868542	DAR_1083	4.53659104041249e-06	0.000392146921400715	4
chr5	144919769	144920169	DAR_1084	4.57819275160757e-06	0.000395380607899135	4
chr6	124885870	124886270	DAR_1085	4.58390504800012e-06	0.000395511741410565	4
chr1	180359331	180359731	DAR_1086	4.69101040576499e-06	0.000404383106340474	4
chr6	114659946	114660346	DAR_1087	4.69929538913126e-06	0.000404727351838175	4
chr4	59043084	59043484	DAR_1088	4.71091960907747e-06	0.00040535829888072	1
chr14	56284394	56284794	DAR_1089	4.81177182745922e-06	0.000413658856638283	4
chr13	24778988	24779388	DAR_1090	4.83884194109897e-06	0.000415607164789818	4
chr2	155553052	155553452	DAR_1091	4.8512189208949e-06	0.000416291085325601	4
chr1	39102102	39102502	DAR_1092	4.86681914003401e-06	0.000417250102399261	4
chr1	138304202	138304602	DAR_1093	4.87849867866084e-06	0.000417871548490888	4
chr6	129747275	129747675	DAR_1094	4.88722327368954e-06	0.000418238988449945	4
chr7	101634468	101634868	DAR_1095	4.94458180171181e-06	0.000422763985470567	2
chr19	21104592	21104992	DAR_1096	4.95468546987552e-06	0.000423244132796694	4
chr11	54112819	54113219	DAR_1097	4.97602692082562e-06	0.000424682507531495	4
chr7	4420181	4420581	DAR_1098	4.98567238148105e-06	0.000424973421475952	2
chr14	34502587	34502987	DAR_1099	4.98844812764566e-06	0.000424973421475952	2
chr4	47272032	47272432	DAR_1100	5.00280870620648e-06	0.000425812166657234	2
chr18	75410167	75410567	DAR_1101	5.02655620510615e-06	0.000427447642953062	4
chr10	96724849	96725249	DAR_1102	5.0622496545543e-06	0.000429688747086459	4
chr3	127875568	127875968	DAR_1103	5.06657027256286e-06	0.000429688747086459	4
chr4	59333217	59333617	DAR_1104	5.06657922275273e-06	0.000429688747086459	2
chr4	141952133	141952533	DAR_1105	5.07961358419768e-06	0.000430407114362022	3
chr8	124509159	124509559	DAR_1106	5.17479972189369e-06	0.000438078848628931	4
chr7	78451585	78451985	DAR_1107	5.22299293774703e-06	0.000441762147964224	4
chr3	131642715	131643115	DAR_1108	5.26717048631122e-06	0.000445099504527376	1
chr10	77520493	77520893	DAR_1109	5.31104959548357e-06	0.000448240008518891	4
chr17	5020747	5021147	DAR_1110	5.31384021890337e-06	0.000448240008518891	4
chr11	96466974	96467374	DAR_1111	5.32605319689774e-06	0.000448868721036492	4
chr15	96297834	96298234	DAR_1112	5.37391685021553e-06	0.000452498193208282	4
chr14	73173673	73174073	DAR_1113	5.37966822447459e-06	0.000452578386481289	4
chr11	30025968	30026368	DAR_1114	5.3847393387154e-06	0.000452601259194503	1
chr1	36962327	36962727	DAR_1115	5.45330867293122e-06	0.000457621888848875	1
chr4	44169918	44170318	DAR_1116	5.45417628666096e-06	0.000457621888848875	4
chr7	25274551	25274951	DAR_1117	5.51654116757618e-06	0.000462239993399138	4
chr11	104663863	104664263	DAR_1118	5.52039318012211e-06	0.000462239993399138	4
chr7	16001729	16002129	DAR_1119	5.52392158122757e-06	0.000462239993399138	4
chr17	87440169	87440569	DAR_1120	5.53387601625804e-06	0.000462662451653587	4
chr3	122417365	122417765	DAR_1121	5.58308398074359e-06	0.000466363065519916	2
chr4	119812740	119813140	DAR_1122	5.59147444410828e-06	0.000466650602124354	2
chr4	126235149	126235549	DAR_1123	5.6049816200814e-06	0.000467364280853242	4
chr9	44033928	44034328	DAR_1124	5.63103875123545e-06	0.000469122236318694	4
chr19	29466803	29467203	DAR_1125	5.6492343187379e-06	0.000470222719238496	4
chr9	96957249	96957649	DAR_1126	5.66139589490159e-06	0.000470819455608892	4
chr4	145222029	145222429	DAR_1127	5.67881605724493e-06	0.000471852075692156	4
chr5	8669614	8670014	DAR_1128	5.69448429814549e-06	0.000472737439001062	4
chr8	84127170	84127570	DAR_1129	5.73439916546754e-06	0.000475632350129944	4
chr12	59169921	59170321	DAR_1130	5.81753830867515e-06	0.000482104204987898	4
chr15	78462956	78463356	DAR_1131	5.88363655533601e-06	0.000487153742426754	4
chr2	168574872	168575272	DAR_1132	5.93382892920424e-06	0.000490878600724969	3
chr19	46613131	46613531	DAR_1133	5.94574112956831e-06	0.000491432961179841	4
chr4	129565133	129565533	DAR_1134	5.9787607934106e-06	0.000493729416938856	4
chr7	81075354	81075754	DAR_1135	6.02305148910258e-06	0.000496951808208922	4
chr6	87722642	87723042	DAR_1136	6.06378624232254e-06	0.00049987542758279	4
chr5	8839039	8839439	DAR_1137	6.09980779600846e-06	0.000502405741325912	4
chr2	59474333	59474733	DAR_1138	6.16576446969043e-06	0.000506481432413773	4
chr11	98487778	98488178	DAR_1139	6.16751000244373e-06	0.000506481432413773	4
chr9	15493300	15493700	DAR_1140	6.16827425675319e-06	0.000506481432413773	1
chr7	64158771	64159171	DAR_1141	6.17077381152433e-06	0.000506481432413773	4
chr10	96599543	96599943	DAR_1142	6.22220613096714e-06	0.000510258777037494	3
chr15	55854573	55854973	DAR_1143	6.23227452811267e-06	0.000510640411748672	4
chr9	52356588	52356988	DAR_1144	6.24399711426405e-06	0.000511156801957378	2
chr2	77341946	77342346	DAR_1145	6.2731835899768e-06	0.000512779523702779	4
chr13	95813645	95814045	DAR_1146	6.27469403493916e-06	0.000512779523702779	4
chr11	79614836	79615236	DAR_1147	6.31877418607942e-06	0.000515934750793586	4
chr15	67410010	67410410	DAR_1148	6.38789368190222e-06	0.000521127240016568	4
chr7	130789429	130789829	DAR_1149	6.43484092062185e-06	0.000524503494123669	2
chr10	117864672	117865072	DAR_1150	6.46286107433202e-06	0.000526332503745276	2
chr1	85959534	85959934	DAR_1151	6.46992980683131e-06	0.000526453555041277	4
chr17	57194127	57194527	DAR_1152	6.51485906154628e-06	0.000529652425445901	2
chr1	179240635	179241035	DAR_1153	6.52225297338766e-06	0.000529796822705659	4
chr1	106352935	106353335	DAR_1154	NA	NA	2
chr2	154615672	154616072	DAR_1155	6.5952215143715e-06	0.000534802713117655	4
chr8	123036923	123037323	DAR_1156	6.60452247486961e-06	0.00053509682219719	2
chr9	77513930	77514330	DAR_1157	6.653675232104e-06	0.000538616437866122	4
chr1	152084627	152085027	DAR_1158	6.6654019864094e-06	0.000538727552018604	4
chr6	87447214	87447614	DAR_1159	6.66661232826695e-06	0.000538727552018604	3
chr7	128376069	128376469	DAR_1160	6.6721853177148e-06	0.000538727552018604	4
chr5	107079891	107080291	DAR_1161	6.75250990820669e-06	0.00054474675099508	4
chr9	40324219	40324619	DAR_1162	6.76258311658671e-06	0.000545093099124738	4
chr4	121002338	121002738	DAR_1163	6.77638934889673e-06	0.00054573949643587	4
chr12	98246833	98247233	DAR_1164	6.80049721905945e-06	0.000547213729725119	4
chr11	81847871	81848271	DAR_1165	6.81209983329524e-06	0.000547680050280114	4
chr17	50050444	50050844	DAR_1166	6.8327605289988e-06	0.000548873208865664	1
chr9	120054834	120055234	DAR_1167	6.85560813253546e-06	0.000550239860557465	1
chr2	32725384	32725784	DAR_1168	6.88992845310809e-06	0.000552524219921143	4
chr2	72282787	72283187	DAR_1169	6.9064617347638e-06	0.000553379513016457	4
chr11	89978466	89978866	DAR_1170	6.96240171901078e-06	0.000557230022963275	4
chr1	85896745	85897145	DAR_1171	6.96633544777908e-06	0.000557230022963275	1
chr1	135807540	135807940	DAR_1172	7.03933372372927e-06	0.000562421531254599	4
chr12	104015282	104015682	DAR_1173	7.0431657078656e-06	0.000562421531254599	4
chr10	81510303	81510703	DAR_1174	7.09117694911775e-06	0.000565776332098518	4
chr5	113824250	113824650	DAR_1175	7.1059259851922e-06	0.000566473847747693	4
chr8	35680651	35681051	DAR_1176	7.15427360663592e-06	0.000569846352213694	4
chr16	36632185	36632585	DAR_1177	7.16639113429818e-06	0.000570329830128488	1
chr16	91490863	91491263	DAR_1178	7.19287194564961e-06	0.000571954616002005	4
chr14	55146828	55147228	DAR_1179	7.25984594613229e-06	0.000576793843000756	3
chr10	53925388	53925788	DAR_1180	7.27166037896741e-06	0.000577246191379865	2
chr19	55552783	55553183	DAR_1181	7.29773917708431e-06	0.00057882917457804	2
chr9	41004500	41004900	DAR_1182	7.34609320112712e-06	0.000582174799595543	4
chr16	5093267	5093667	DAR_1183	7.40724156172755e-06	0.000586527900891553	4
chr8	25948799	25949199	DAR_1184	7.4335037949332e-06	0.000588113626165071	4
chr15	53266993	53267393	DAR_1185	7.62900518649867e-06	0.000603075098175297	4
chr2	122765151	122765551	DAR_1186	7.63657390722194e-06	0.000603167818650234	4
chr13	21362644	21363044	DAR_1187	7.71340177851937e-06	0.000608726177009896	2
chr19	5815934	5816334	DAR_1188	7.73579131726429e-06	0.000609982668693347	2
chr2	157395963	157396363	DAR_1189	7.76407360252123e-06	0.000611701327680008	1
chr8	83612074	83612474	DAR_1190	7.77941259062641e-06	0.000612398216347416	4
chr5	53378587	53378987	DAR_1191	7.79669059329068e-06	0.000613246455197218	2
chr1	150164895	150165295	DAR_1192	7.82755041098467e-06	0.00061506225029723	4
chr19	53539180	53539580	DAR_1193	7.8328200728151e-06	0.00061506225029723	4
chr8	124434382	124434782	DAR_1194	8.01426690868639e-06	0.000628786580164299	1
chr4	148657830	148658230	DAR_1195	8.04025344073036e-06	0.000630301065033216	4
chr4	150924940	150925340	DAR_1196	8.08084271230291e-06	0.00063295683859564	4
chr6	97311734	97312134	DAR_1197	8.10273299519317e-06	0.000634144763964882	4
chr3	126663511	126663911	DAR_1198	8.16182734231763e-06	0.000638240009263639	2
chr16	10852402	10852802	DAR_1199	8.19745528968074e-06	0.000640485122204329	2
chr12	116596936	116597336	DAR_1200	8.20412087780153e-06	0.000640485122204329	4
chr9	42488058	42488458	DAR_1201	8.29488047464089e-06	0.000646500242084263	4
chr3	152950294	152950694	DAR_1202	8.30511563661468e-06	0.000646763451975409	4
chr9	78010698	78011098	DAR_1203	8.51845832200729e-06	0.000662830238427014	4
chr6	35420938	35421338	DAR_1204	8.58157285857559e-06	0.000667190759747476	2
chr13	52998559	52998959	DAR_1205	8.5913024874793e-06	0.000667397004684275	2
chr1	138188116	138188516	DAR_1206	8.68373233681609e-06	0.00067402201274742	4
chr11	54162943	54163343	DAR_1207	8.72629200337835e-06	0.000676768437469245	4
chr5	121341216	121341616	DAR_1208	8.76918676251703e-06	0.000679536315540422	4
chr10	11343463	11343863	DAR_1209	8.81551936322521e-06	0.000682565832994811	1
chr4	32423707	32424107	DAR_1210	8.88962705501066e-06	0.000687739178570049	4
chr13	63261163	63261563	DAR_1211	8.9164874276406e-06	0.000689251786752871	4
chr18	80597410	80597810	DAR_1212	8.93136824084542e-06	0.000689836645937272	4
chr4	150965496	150965896	DAR_1213	8.95052080022066e-06	0.000690750216944689	4
chr4	137713074	137713474	DAR_1214	8.96151260734581e-06	0.000691033008553525	4
chr1	85987224	85987624	DAR_1215	9.07412505018389e-06	0.000699145025414781	2
chr17	23980442	23980842	DAR_1216	9.1903358238889e-06	0.000707520816770196	4
chr10	19001281	19001681	DAR_1217	9.22166722624472e-06	0.00070935381003708	4
chr16	91562025	91562425	DAR_1218	9.23148663902642e-06	0.000709468100631004	3
chr14	36316671	36317071	DAR_1219	9.23819894148762e-06	0.000709468100631004	4
chr5	72636062	72636462	DAR_1220	9.29654713889881e-06	0.000713368161943149	4
chr2	132691729	132692129	DAR_1221	9.323266000277e-06	0.000714836785925304	4
chr4	142075958	142076358	DAR_1222	9.34793297371767e-06	0.000715598427646458	3
chr10	19598018	19598418	DAR_1223	9.34837565462199e-06	0.000715598427646458	4
chr4	44059690	44060090	DAR_1224	9.39550697646331e-06	0.000718622933032705	4
chr3	107846140	107846540	DAR_1225	9.41084695545037e-06	0.000719212920443807	4
chrX	41400471	41400871	DAR_1226	9.43184430215144e-06	0.000720233960002426	4
chr1	191384918	191385318	DAR_1227	9.46251348429918e-06	0.000721829758598778	1
chr9	32594284	32594684	DAR_1228	9.46805021246237e-06	0.000721829758598778	2
chr2	32063042	32063442	DAR_1229	9.54763009763031e-06	0.00072676061823659	2
chr6	115594469	115594869	DAR_1230	9.54813965023948e-06	0.00072676061823659	2
chr9	58139924	58140324	DAR_1231	9.57843838007344e-06	0.000728478861539989	4
chr7	139684576	139684976	DAR_1232	9.59112921763029e-06	0.000728856263599565	2
chr14	15099896	15100296	DAR_1233	9.68005691910023e-06	0.000735021842085012	4
chr8	72277174	72277574	DAR_1234	9.69196240669127e-06	0.000735333788163985	4
chr9	121454885	121455285	DAR_1235	9.70764427748887e-06	0.000735931518389986	4
chr4	156004094	156004494	DAR_1236	9.77449821265569e-06	0.000740404500354152	4
chr15	80538629	80539029	DAR_1237	9.85216726761951e-06	0.000745688875206575	4
chr11	108920157	108920557	DAR_1238	9.87460210716129e-06	0.00074633625301699	4
chr4	32126844	32127244	DAR_1239	9.87654833432517e-06	0.00074633625301699	3
chr2	157147691	157148091	DAR_1240	9.88942228216636e-06	0.000746545381461498	4
chr6	134932633	134933033	DAR_1241	9.89514804655936e-06	0.000746545381461498	4
chr10	70032965	70033365	DAR_1242	9.92697652298224e-06	0.000748125921776375	4
chr17	85189557	85189957	DAR_1243	9.93196320595524e-06	0.000748125921776375	2
chr9	45062647	45063047	DAR_1244	1.00123835533213e-05	0.000753581688557916	4
chr6	112947134	112947534	DAR_1245	1.00590708897659e-05	0.00075649186475371	2
chr7	16207467	16207867	DAR_1246	1.01285466344143e-05	0.000761109838606937	1
chr5	64681149	64681549	DAR_1247	1.01878455604248e-05	0.000764956330626575	4
chr6	31130028	31130428	DAR_1248	1.02180735858635e-05	0.000766615644918085	1
chr5	75791762	75792162	DAR_1249	1.02857161470014e-05	0.000771077132492258	4
chr2	145832436	145832836	DAR_1250	1.03785882734719e-05	0.000776943902939933	4
chr1	46864157	46864557	DAR_1251	1.03804523280808e-05	0.000776943902939933	4
chr16	30948191	30948591	DAR_1252	1.04869545297983e-05	0.000784292800033063	1
chr17	23966895	23967295	DAR_1253	1.05204432005153e-05	0.000786173880278124	1
chr2	34073919	34074319	DAR_1254	NA	NA	4
chr5	33516225	33516625	DAR_1255	1.05787042325832e-05	0.000789276788023908	1
chr12	85660788	85661188	DAR_1256	1.06273305103979e-05	0.000792277990864895	2
chr14	64323577	64323977	DAR_1257	1.07034550928514e-05	0.000797322858958557	4
chr3	116374478	116374878	DAR_1258	1.07445422492548e-05	0.000799751812076143	4
chr8	117262693	117263093	DAR_1259	1.08347009833722e-05	0.000805826613279876	4
chr12	70219123	70219523	DAR_1260	1.09305854375033e-05	0.000812317352919324	4
chr8	34166784	34167184	DAR_1261	1.09470192643154e-05	0.000812898067527398	4
chr11	7145190	7145590	DAR_1262	1.09597080797086e-05	0.000813192445401452	4
chr9	120796138	120796538	DAR_1263	1.0968229193492e-05	0.000813192445401452	4
chr2	61496966	61497366	DAR_1264	1.10540202208536e-05	0.000818909257633967	2
chr9	88327420	88327820	DAR_1265	1.11107581214435e-05	0.000822466456953669	1
chr1	154175342	154175742	DAR_1266	1.11329653916935e-05	0.000823463974270146	4
chr17	33947720	33948120	DAR_1267	1.1146268628469e-05	0.000823801846038424	4
chr2	11160698	11161098	DAR_1268	1.11607048062151e-05	0.000824222856820462	4
chr1	37696851	37697251	DAR_1269	1.12076315913922e-05	0.000827040776595796	4
chr14	79239356	79239756	DAR_1270	1.12723690592938e-05	0.000831167559714477	4
chr2	118008001	118008401	DAR_1271	1.1314526662748e-05	0.000833624270299825	4
chr9	116163937	116164337	DAR_1272	1.13658393475474e-05	0.000836751140787782	4
chr2	32917496	32917896	DAR_1273	1.13903423532484e-05	0.000837319651266892	1
chr15	81218994	81219394	DAR_1274	1.1391318911379e-05	0.000837319651266892	4
chr9	120074529	120074929	DAR_1275	1.15061179753248e-05	0.000845099274064606	4
chr11	115481516	115481916	DAR_1276	1.15465139125607e-05	0.000846747346463345	4
chr1	20825005	20825405	DAR_1277	1.15885639356145e-05	0.000849170706352754	4
chr10	77891011	77891411	DAR_1278	1.16331829476887e-05	0.000851778403919008	3
chr1	138162727	138163127	DAR_1279	1.16477564242734e-05	0.000852183836387861	2
chr1	184118002	184118402	DAR_1280	1.17711120194906e-05	0.000860040598186406	4
chr7	122932181	122932581	DAR_1281	1.17734215024056e-05	0.000860040598186406	4
chr3	148852623	148853023	DAR_1282	1.17927875851939e-05	0.000860040598186406	4
chr18	35063325	35063725	DAR_1283	1.17939640017326e-05	0.000860040598186406	4
chr14	122908087	122908487	DAR_1284	1.18007415573946e-05	0.000860040598186406	4
chr11	79131830	79132230	DAR_1285	1.18725442208102e-05	0.000864605426897256	3
chr11	34048680	34049080	DAR_1286	1.19340632479632e-05	0.000868125465386921	4
chr7	80454010	80454410	DAR_1287	1.19392911301053e-05	0.000868125465386921	1
chr11	6567985	6568385	DAR_1288	1.19616167450972e-05	0.00086907872910623	4
chr13	95696817	95697217	DAR_1289	1.21295268345982e-05	0.000880066314536722	4
chr16	14088148	14088548	DAR_1290	1.21315088900902e-05	0.000880066314536722	1
chr8	125620272	125620672	DAR_1291	1.21875091617653e-05	0.00088344921331176	2
chr6	48679884	48680284	DAR_1292	1.22251414790542e-05	0.000885496480387988	2
chr17	50524917	50525317	DAR_1293	1.22358553608292e-05	0.000885592334239233	4
chr17	23797361	23797761	DAR_1294	1.22741473436991e-05	0.000887682525722566	4
chr8	124260136	124260536	DAR_1295	NA	NA	4
chr16	93912068	93912468	DAR_1296	1.25074325495956e-05	0.000902264610110678	1
chr1	133842324	133842724	DAR_1297	1.25215982150121e-05	0.000902264610110678	4
chr17	71125505	71125905	DAR_1298	1.25236130365177e-05	0.000902264610110678	4
chr17	80112567	80112967	DAR_1299	1.25961386470075e-05	0.000906796982735372	4
chr6	100086054	100086454	DAR_1300	1.27282340193342e-05	0.000915607601572352	3
chr17	27814623	27815023	DAR_1301	1.27434022103033e-05	0.000916000024578559	4
chr8	57828306	57828706	DAR_1302	1.28197650868236e-05	0.000920086442955154	4
chr9	58112282	58112682	DAR_1303	1.28454723882254e-05	0.000921230391267203	4
chr3	130905081	130905481	DAR_1304	1.29218074548507e-05	0.000926000680581008	4
chr16	36927421	36927821	DAR_1305	1.29443205692676e-05	0.000926767184963878	4
chr17	64248230	64248630	DAR_1306	1.29521578438758e-05	0.000926767184963878	4
chr4	151985987	151986387	DAR_1307	1.2979686732903e-05	0.000928032840576106	4
chr12	3547520	3547920	DAR_1308	1.31825919846725e-05	0.000941826289620084	4
chr1	191425900	191426300	DAR_1309	1.32230772875179e-05	0.000944003595574526	4
chr6	38847932	38848332	DAR_1310	1.3274953609464e-05	0.000946990204272102	4
chr5	147063235	147063635	DAR_1311	1.33793430854685e-05	0.00095312136903895	2
chr2	93459066	93459466	DAR_1312	1.33811137307683e-05	0.00095312136903895	4
chr6	29853313	29853713	DAR_1313	1.34072710516795e-05	0.000954263781940179	2
chr5	103424937	103425337	DAR_1314	1.34206168082108e-05	0.000954493295122126	1
chr8	126884131	126884531	DAR_1315	1.3452473385787e-05	0.000956037986129174	3
chr5	115717146	115717546	DAR_1316	1.35596006057012e-05	0.000962925643314655	4
chr14	121846051	121846451	DAR_1317	1.36027026901836e-05	0.000965259655833815	4
chr10	17775096	17775496	DAR_1318	1.36635996697531e-05	0.0009688519504176	2
chr10	21479402	21479802	DAR_1319	1.36833306159691e-05	0.000969522058903226	4
chr19	10943954	10944354	DAR_1320	1.37369186621729e-05	0.000972588279484638	1
chr5	102520528	102520928	DAR_1321	1.37660016796772e-05	0.000973916219358827	3
chr12	105971161	105971561	DAR_1322	1.37881442171496e-05	0.000974751511759164	4
chr12	28845840	28846240	DAR_1323	1.38621973587577e-05	0.000979252618960568	4
chr2	11169962	11170362	DAR_1324	1.39220017569255e-05	0.000982741182402975	4
chr15	6579398	6579798	DAR_1325	NA	NA	4
chr12	73656554	73656954	DAR_1326	1.3999076994581e-05	0.000986704748974553	4
chr6	83273758	83274158	DAR_1327	1.40250640702149e-05	0.000987798145832532	4
chr17	44105692	44106092	DAR_1328	1.40661271671744e-05	0.000989950936384119	2
chr13	24547038	24547438	DAR_1329	1.41273560328256e-05	0.000992155778517019	4
chr12	70695069	70695469	DAR_1330	1.4128624192445e-05	0.000992155778517019	4
chr3	115758371	115758771	DAR_1331	1.41290170459071e-05	0.000992155778517019	3
chr7	107702956	107703356	DAR_1332	1.41894679345973e-05	0.000995459289120535	1
chr11	109218821	109219221	DAR_1333	1.41971724672306e-05	0.000995459289120535	4
chr5	107545927	107546327	DAR_1334	1.42186416259308e-05	0.000996223949343725	4
chr8	67631675	67632075	DAR_1335	1.43708321872465e-05	0.00100516695434553	4
chr4	135885717	135886117	DAR_1336	1.43761045839312e-05	0.00100516695434553	2
chr10	96720951	96721351	DAR_1337	1.43889148034236e-05	0.00100516695434553	4
chr12	73580827	73581227	DAR_1338	1.44074172243731e-05	0.00100571450494371	4
chr12	73679363	73679763	DAR_1339	1.45228461430621e-05	0.00101302222722911	4
chr5	118036852	118037252	DAR_1340	1.45831310029005e-05	0.00101621340048697	4
chr8	128654720	128655120	DAR_1341	1.45934080002891e-05	0.00101621340048697	2
chr14	78482661	78483061	DAR_1342	1.46009220700462e-05	0.00101621340048697	4
chr14	120304744	120305144	DAR_1343	1.46435013588251e-05	0.00101842528218785	4
chr8	13623936	13624336	DAR_1344	1.46605665257793e-05	0.00101886075707197	1
chr1	182358126	182358526	DAR_1345	1.47431336265994e-05	0.00102253416629705	4
chr7	142381201	142381601	DAR_1346	1.47541952427529e-05	0.00102253416629705	4
chr19	26734497	26734897	DAR_1347	1.47567943029709e-05	0.00102253416629705	4
chr9	90259582	90259982	DAR_1348	1.48527305632799e-05	0.00102842618298916	4
chr7	120699684	120700084	DAR_1349	1.49343559196774e-05	0.00103331937176597	4
chr6	122921464	122921864	DAR_1350	1.50239823809545e-05	0.00103836555986779	4
chr6	135218350	135218750	DAR_1351	1.50293084205789e-05	0.00103836555986779	4
chr16	24153988	24154388	DAR_1352	1.50627547744541e-05	0.00103969007484992	4
chr2	59338424	59338824	DAR_1353	1.50705285113495e-05	0.00103969007484992	4
chr1	153320143	153320543	DAR_1354	1.50883162015002e-05	0.00104008794446012	4
chr1	133821128	133821528	DAR_1355	1.50983532077778e-05	0.00104008794446012	4
chr7	107683647	107684047	DAR_1356	1.51514586662538e-05	0.00104298438864117	1
chr2	169958726	169959126	DAR_1357	1.53101677198927e-05	0.0010531407637928	4
chr8	46755878	46756278	DAR_1358	1.53563843294719e-05	0.00105554995405212	2
chr5	124079058	124079458	DAR_1359	1.53942366399423e-05	0.00105738111784635	4
chr7	28800002	28800402	DAR_1360	1.54857048240717e-05	0.00106288963962426	4
chr3	68787378	68787778	DAR_1361	1.55038956959307e-05	0.00106336428465173	4
chr9	75607539	75607939	DAR_1362	1.55346580002494e-05	0.00106469984885866	4
chr13	42258457	42258857	DAR_1363	1.56352845745016e-05	0.0010708182878486	2
chr6	128025601	128026001	DAR_1364	1.57994524438209e-05	0.0010812764598109	4
chr11	83116571	83116971	DAR_1365	1.58580423422608e-05	0.00108449920171979	4
chr3	51226631	51227031	DAR_1366	1.60249416605412e-05	0.00109511896607294	4
chr13	53024284	53024684	DAR_1367	1.62039705307584e-05	0.0011065516646229	3
chr16	91442370	91442770	DAR_1368	1.65049048438627e-05	0.00112628658546321	4
chr6	100824435	100824835	DAR_1369	1.65551082512842e-05	0.00112889558485456	3
chr5	64496918	64497318	DAR_1370	1.66134005788544e-05	0.00113205200028181	4
chr12	113023101	113023501	DAR_1371	1.66261390979732e-05	0.00113210202159751	4
chr9	114026576	114026976	DAR_1372	1.66507605644045e-05	0.00113296051698939	2
chr8	80051481	80051881	DAR_1373	1.66877192986582e-05	0.00113465662862189	4
chr11	34050029	34050429	DAR_1374	1.67344462908061e-05	0.00113701399592727	4
chr9	77990245	77990645	DAR_1375	1.67736649632601e-05	0.00113885818696196	2
chr19	6297617	6298017	DAR_1376	1.67909402347631e-05	0.00113921093576965	1
chr2	30727999	30728399	DAR_1377	1.68590849887432e-05	0.00114301202590468	4
chr2	152372071	152372471	DAR_1378	1.6938641662083e-05	0.00114758080404171	4
chr15	85233084	85233484	DAR_1379	NA	NA	4
chr19	8706027	8706427	DAR_1380	1.69709069966532e-05	0.00114811716365378	4
chr3	100819581	100819981	DAR_1381	1.70003481455166e-05	0.0011492844677844	4
chr13	52448866	52449266	DAR_1382	1.70978685439808e-05	0.00115504920399512	2
chr3	83791395	83791795	DAR_1383	1.73027325565446e-05	0.00116801543850178	4
chr1	152090160	152090560	DAR_1384	1.73168859654791e-05	0.00116801543850178	4
chr14	79236338	79236738	DAR_1385	1.73269598064193e-05	0.00116801543850178	4
chr19	12473253	12473653	DAR_1386	1.75157930566136e-05	0.00117990135413576	4
chr13	40922379	40922779	DAR_1387	1.75643487941814e-05	0.00118200473080228	4
chr18	32880441	32880841	DAR_1388	1.75720851324376e-05	0.00118200473080228	4
chr11	51599279	51599679	DAR_1389	1.76409460517092e-05	0.00118579094746867	4
chr12	108333963	108334363	DAR_1390	1.76606914134012e-05	0.00118627266746697	3
chr1	138560738	138561138	DAR_1391	1.77190961017391e-05	0.00118854278810568	1
chr7	98804827	98805227	DAR_1392	1.77196937669164e-05	0.00118854278810568	1
chr15	27724999	27725399	DAR_1393	1.7768174545432e-05	0.0011909475741692	4
chr18	80684322	80684722	DAR_1394	1.77975949295322e-05	0.00119156371587568	2
chr1	39091158	39091558	DAR_1395	1.78026368739207e-05	0.00119156371587568	4
chr10	81538604	81539004	DAR_1396	1.78438709753221e-05	0.00119347655324093	2
chr13	91377445	91377845	DAR_1397	1.78747211428116e-05	0.00119469264834524	4
chr5	114661010	114661410	DAR_1398	1.79531309772128e-05	0.00119901686888565	2
chr2	113829473	113829873	DAR_1399	1.79648471029237e-05	0.00119901686888565	4
chr17	26234446	26234846	DAR_1400	1.80652407177865e-05	0.00120431408403547	4
chr1	151685040	151685440	DAR_1401	1.80697554678888e-05	0.00120431408403547	4
chr10	108167835	108168235	DAR_1402	1.822665784501e-05	0.00121391343318457	2
chr8	126662765	126663165	DAR_1403	1.85610846150111e-05	0.00123531418968797	2
chr2	53095079	53095479	DAR_1404	1.85820681455921e-05	0.001235838575886	4
chr13	46983865	46984265	DAR_1405	1.86914265901594e-05	0.0012422356359677	2
chr15	55846986	55847386	DAR_1406	1.8790221723072e-05	0.00124792214087165	4
chr9	73073216	73073616	DAR_1407	1.88476533979577e-05	0.00124989876282094	4
chr10	18995509	18995909	DAR_1408	1.88526521237966e-05	0.00124989876282094	3
chr18	5748778	5749178	DAR_1409	1.88597446583413e-05	0.00124989876282094	2
chr11	68198909	68199309	DAR_1410	NA	NA	4
chr12	107123556	107123956	DAR_1411	1.91085894284568e-05	0.00126461315314349	4
chr2	166666260	166666660	DAR_1412	1.93728523335795e-05	0.00128120307505111	4
chr5	64905958	64906358	DAR_1413	1.96050888449106e-05	0.0012956531981058	2
chr11	52109431	52109831	DAR_1414	1.96288734841474e-05	0.00129631664682737	4
chr11	20107690	20108090	DAR_1415	1.96837987723778e-05	0.00129903429728946	2
chr6	135364383	135364783	DAR_1416	1.9792020860295e-05	0.00130526301487541	4
chr1	86018179	86018579	DAR_1417	1.98528749191018e-05	0.00130836133822204	2
chr2	126491436	126491836	DAR_1418	2.0029908106088e-05	0.00131910652497265	4
chr16	90475722	90476122	DAR_1419	2.02021712217964e-05	0.00132952279233353	4
chr7	125507296	125507696	DAR_1420	2.02500994225199e-05	0.00133174764730794	4
chr2	34042300	34042700	DAR_1421	2.04698207477807e-05	0.00134525950192401	4
chr7	79721303	79721703	DAR_1422	2.05648745439026e-05	0.00134976349721066	4
chr11	74479689	74480089	DAR_1423	2.05793852010532e-05	0.00134976349721066	2
chr3	157634403	157634803	DAR_1424	2.05812920460722e-05	0.00134976349721066	4
chr3	152920388	152920788	DAR_1425	2.06176025863523e-05	0.00135120517519884	4
chr1	40091603	40092003	DAR_1426	2.07847621737902e-05	0.00136121428216919	2
chr8	81782751	81783151	DAR_1427	2.08643498455008e-05	0.00136547830734187	4
chr12	91523639	91524039	DAR_1428	2.10516699408535e-05	0.00137582802294669	4
chr10	44609205	44609605	DAR_1429	2.12669511442425e-05	0.00138893515343496	4
chr5	74348241	74348641	DAR_1430	2.15032705240582e-05	0.00140242664821048	3
chr5	121183265	121183665	DAR_1431	2.15481202512722e-05	0.00140438049518779	2
chr1	131038071	131038471	DAR_1432	2.16334183845318e-05	0.00140896601352903	3
chr7	46832140	46832540	DAR_1433	2.1770748923364e-05	0.00141693168993492	4
chr6	97294003	97294403	DAR_1434	2.18106556974448e-05	0.00141855000473029	2
chr2	84498920	84499320	DAR_1435	2.18618318989983e-05	0.00142089853955812	4
chr19	29676807	29677207	DAR_1436	2.19293455823415e-05	0.00142430495443104	2
chr4	47319649	47320049	DAR_1437	2.21877715846995e-05	0.00144009784916604	4
chr16	18195069	18195469	DAR_1438	2.22575134447791e-05	0.00144329810152068	4
chr3	51195312	51195712	DAR_1439	2.2267686785844e-05	0.00144329810152068	2
chr15	64185802	64186202	DAR_1440	2.23750203365121e-05	0.00144925895801885	2
chr17	85170862	85171262	DAR_1441	2.24017566691377e-05	0.00144999482923567	4
chr5	31602374	31602774	DAR_1442	2.25182936598109e-05	0.00145653821685582	4
chr3	103850744	103851144	DAR_1443	2.26665782997476e-05	0.00146412123268103	1
chr12	86686908	86687308	DAR_1444	2.27072757001712e-05	0.00146574609819031	2
chr1	35765685	35766085	DAR_1445	2.2723538942e-05	0.00146579260396935	4
chr13	40722889	40723289	DAR_1446	2.27805903476019e-05	0.00146793509168367	3
chr16	95839858	95840258	DAR_1447	2.27878839770631e-05	0.00146793509168367	2
chr2	18928180	18928580	DAR_1448	2.29612337268125e-05	0.0014779578289476	4
chr1	91093313	91093713	DAR_1449	2.29748181708377e-05	0.0014779578289476	4
chr11	81836532	81836932	DAR_1450	2.31438970944581e-05	0.00148781970230883	2
chr15	75703974	75704374	DAR_1451	2.33282903559092e-05	0.00149865196089559	1
chr12	76695127	76695527	DAR_1453	2.36317885007812e-05	0.00151608372662801	1
chr14	78356757	78357157	DAR_1454	2.36787226284173e-05	0.00151806206316665	4
chr10	108189991	108190391	DAR_1455	2.37366802290678e-05	0.00152020591398334	2
chr5	53490743	53491143	DAR_1456	2.38392442589789e-05	0.00152439812960964	4
chr2	32047322	32047722	DAR_1457	2.38422093924546e-05	0.00152439812960964	4
chr11	100848033	100848433	DAR_1458	2.39041425694089e-05	0.00152732247513093	4
chr17	71490961	71491361	DAR_1459	2.39224812637626e-05	0.00152745933685962	4
chr7	4091158	4091558	DAR_1460	2.40787562795911e-05	0.001536397339959	1
chr6	125067546	125067946	DAR_1461	2.41326307305723e-05	0.0015387937838459	4
chr1	37317641	37318041	DAR_1462	2.4198705246362e-05	0.00154196438896531	4
chr8	34216294	34216694	DAR_1463	2.43027161990642e-05	0.00154754642578336	4
chr15	81101331	81101731	DAR_1464	2.43644640537291e-05	0.00155043151924091	4
chr2	168742324	168742724	DAR_1465	2.44287675643793e-05	0.00155347524119617	4
chr16	32750660	32751060	DAR_1466	2.44649715804288e-05	0.00155472916094036	4
chr8	125391307	125391707	DAR_1467	2.45193215246716e-05	0.00155621818950646	2
chr5	66112065	66112465	DAR_1468	2.45214059360026e-05	0.00155621818950646	1
chr3	131156369	131156769	DAR_1469	2.46451805196793e-05	0.00156160885813752	4
chr3	101012356	101012756	DAR_1470	2.46528658918392e-05	0.00156160885813752	2
chr1	88590980	88591380	DAR_1471	2.46560233043863e-05	0.00156160885813752	4
chr16	96273105	96273505	DAR_1472	NA	NA	4
chr11	64047435	64047835	DAR_1473	2.48105412882429e-05	0.00156928753673395	4
chr8	13660341	13660741	DAR_1474	2.48568619616516e-05	0.00157116359317526	4
chr8	111563693	111564093	DAR_1475	2.49237008736968e-05	0.00157433319376806	4
chr12	35833294	35833694	DAR_1476	2.49737474821302e-05	0.00157643855675854	4
chr2	127312725	127313125	DAR_1477	2.51110929403594e-05	0.00158298919914871	4
chr13	46098581	46098981	DAR_1478	2.53177588642373e-05	0.00159282313889902	2
chr10	96693773	96694173	DAR_1479	2.53648586310604e-05	0.00159472248194628	4
chr1	131698783	131699183	DAR_1480	2.56540318809568e-05	0.00161132389018441	2
chr19	36477089	36477489	DAR_1481	2.56630842149256e-05	0.00161132389018441	4
chr11	100609888	100610288	DAR_1482	2.59232010651474e-05	0.0016244115101999	4
chr13	60936434	60936834	DAR_1483	2.60236442833588e-05	0.00162962272339357	4
chr12	99329163	99329563	DAR_1484	2.6093571979706e-05	0.0016312080047333	4
chr15	101195380	101195780	DAR_1485	2.61008501929077e-05	0.0016312080047333	4
chr1	85958085	85958485	DAR_1486	2.62373938027589e-05	0.00163865556116343	1
chr9	90242867	90243267	DAR_1487	2.63211484587052e-05	0.00164279850939452	4
chr12	3560630	3561030	DAR_1488	2.64891619582114e-05	0.0016521913999954	2
chr11	109410552	109410952	DAR_1489	2.65116139527423e-05	0.00165249886123018	1
chr5	44211857	44212257	DAR_1490	2.65798938093323e-05	0.00165566053201896	2
chr1	36998371	36998771	DAR_1491	2.66912936198423e-05	0.0016615021963079	2
chr14	56314446	56314846	DAR_1492	2.67798319834252e-05	0.00166591399397156	2
chr18	32953867	32954267	DAR_1493	2.68729647857292e-05	0.00167060559660367	4
chr10	96602300	96602700	DAR_1494	2.69689320723916e-05	0.00167546711261596	4
chr9	61627858	61628258	DAR_1495	2.70212686368925e-05	0.0016776134176033	3
chr4	6681973	6682373	DAR_1496	2.70453210656383e-05	0.00167800203535339	4
chr8	85618747	85619147	DAR_1497	2.7279510207248e-05	0.0016914193090828	4
chr7	67546243	67546643	DAR_1498	2.7454247145168e-05	0.00170113514160274	2
chr9	62515819	62516219	DAR_1499	2.7612649723877e-05	0.00170960459333525	4
chr5	24344490	24344890	DAR_1500	2.77235542201988e-05	0.00171444277235691	4
chr8	86706804	86707204	DAR_1501	2.7775926872985e-05	0.00171549186875237	4
chr1	162752002	162752402	DAR_1502	2.77768997379289e-05	0.00171549186875237	4
chr11	81913085	81913485	DAR_1503	2.78176975403078e-05	0.00171688717404045	4
chr10	19122202	19122602	DAR_1504	2.79230777238703e-05	0.00172226402282867	4
chr8	111527167	111527567	DAR_1505	2.79593591603696e-05	0.00172337469564508	4
chr17	12655811	12656211	DAR_1506	2.8425063151399e-05	0.00175093561764793	4
chr2	5706630	5707030	DAR_1507	2.84912872297238e-05	0.00175386933731956	2
chr10	61167417	61167817	DAR_1508	2.87889421316633e-05	0.00176988185502658	1
chr7	110109086	110109486	DAR_1509	2.89756939518858e-05	0.00178020245571368	2
chr19	53231174	53231574	DAR_1510	2.90431946772143e-05	0.00178231463352872	2
chr15	76616369	76616769	DAR_1511	2.90478712262467e-05	0.00178231463352872	4
chr14	48202337	48202737	DAR_1512	2.9072529997869e-05	0.00178266780657284	4
chr4	139598883	139599283	DAR_1513	2.91499260488724e-05	0.00178625216107278	1
chr19	47512830	47513230	DAR_1514	2.91800047525448e-05	0.00178693422610276	4
chr2	118961542	118961942	DAR_1515	2.94624843906864e-05	0.00180306198275955	4
chr3	89864107	89864507	DAR_1516	2.95397001978135e-05	0.00180661511449753	4
chr10	54032502	54032902	DAR_1517	NA	NA	4
chr1	161321650	161322050	DAR_1518	3.00287884416339e-05	0.00183414828469247	1
chr11	50212999	50213399	DAR_1519	3.00530000694077e-05	0.00183443901459264	3
chr5	140763163	140763563	DAR_1520	3.04358291162902e-05	0.00185540513023269	2
chr4	44044778	44045178	DAR_1521	NA	NA	4
chr1	107582997	107583397	DAR_1522	NA	NA	4
chr9	92269857	92270257	DAR_1523	3.06885514250296e-05	0.00186719046402598	2
chr18	68189771	68190171	DAR_1524	3.0827467849589e-05	0.00187443327562295	3
chr10	8184747	8185147	DAR_1525	3.08795955542652e-05	0.00187639305279387	4
chr7	19202461	19202861	DAR_1526	3.09913373837022e-05	0.0018810344494908	2
chr12	16171639	16172039	DAR_1527	3.09958702377205e-05	0.0018810344494908	4
chr18	84799278	84799678	DAR_1528	3.10907433932826e-05	0.00188557860912559	4
chr10	19002513	19002913	DAR_1529	3.16846401791447e-05	0.00192036205743869	4
chr6	82913823	82914223	DAR_1530	3.19024186359402e-05	0.00193231945683983	4
chr16	87324560	87324960	DAR_1531	3.19906799379186e-05	0.00193642172843728	4
chr1	43403351	43403751	DAR_1532	3.20178440592378e-05	0.00193682284778354	4
chr2	11187159	11187559	DAR_1533	3.22825293489084e-05	0.00195158236878686	4
chr9	118196667	118197067	DAR_1534	3.23766019138247e-05	0.00195601550076045	4
chr19	24315221	24315621	DAR_1535	3.24748269444444e-05	0.00196017702870713	4
chr11	6480994	6481394	DAR_1536	3.2487054999833e-05	0.00196017702870713	4
chr6	135362745	135363145	DAR_1537	NA	NA	4
chr11	83535031	83535431	DAR_1538	3.27126561734931e-05	0.00197126675128026	1
chr18	75819982	75820382	DAR_1539	3.2770990880147e-05	0.00197299732118246	2
chr18	70602104	70602504	DAR_1540	3.27832165405846e-05	0.00197299732118246	4
chr16	91366619	91367019	DAR_1541	3.29282067046826e-05	0.00198045943220568	3
chr9	48538226	48538626	DAR_1542	3.30135317477845e-05	0.00198080003653073	4
chr9	32938873	32939273	DAR_1543	3.30343716620157e-05	0.00198080003653073	4
chr5	112301661	112302061	DAR_1544	3.30613120782485e-05	0.00198088510683824	4
chr6	51287774	51288174	DAR_1545	3.31435172963231e-05	0.00198454964169165	3
chr13	63649265	63649665	DAR_1546	3.31741865019724e-05	0.00198512563860502	2
chr11	51750666	51751066	DAR_1547	3.32177332528289e-05	0.00198647100182279	4
chr13	91814663	91815063	DAR_1548	3.33331464060172e-05	0.00199084802920346	4
chr5	3669831	3670231	DAR_1549	3.33669242376437e-05	0.00199160412916422	4
chr9	13446275	13446675	DAR_1550	3.34252948270594e-05	0.00199382623608823	4
chr13	43761168	43761568	DAR_1551	3.35561803989508e-05	0.00200036833431344	1
chr1	171782548	171782948	DAR_1552	3.3635953203359e-05	0.0020037384173142	4
chr17	73087000	73087400	DAR_1553	3.36552074928233e-05	0.0020037384173142	2
chr8	111573589	111573989	DAR_1554	3.37087211040249e-05	0.0020056040624995	2
chr11	119925227	119925627	DAR_1555	3.37290767718643e-05	0.0020056040624995	4
chr2	114136742	114137142	DAR_1556	3.39097964094679e-05	0.00201507950219766	4
chr12	106030408	106030808	DAR_1557	3.39764140944203e-05	0.00201776680352802	2
chr1	184014084	184014484	DAR_1558	3.41401132091693e-05	0.00202621249617189	2
chr3	30965614	30966014	DAR_1559	3.41719762511755e-05	0.00202682802787397	4
chr1	39843302	39843702	DAR_1560	3.43187534310859e-05	0.00203425435564137	4
chr17	29435442	29435842	DAR_1561	3.44283275423769e-05	0.00203946751604205	4
chr5	77140174	77140574	DAR_1562	3.47907748283775e-05	0.0020596444455366	4
chr14	36962273	36962673	DAR_1563	NA	NA	2
chr10	95745822	95746222	DAR_1565	3.5325912649588e-05	0.00208721918769762	2
chr9	115387462	115387862	DAR_1566	3.53450861839853e-05	0.00208721918769762	1
chr1	43888427	43888827	DAR_1567	3.55385997385314e-05	0.00209733337017627	4
chr8	46543092	46543492	DAR_1568	3.60512417731143e-05	0.00212602564118518	4
chr10	85874087	85874487	DAR_1569	3.6069867834798e-05	0.00212602564118518	2
chr12	12274100	12274500	DAR_1570	3.61219251855772e-05	0.00212776414645611	4
chr5	24348139	24348539	DAR_1571	3.61499163776448e-05	0.00212808374770696	1
chr9	7509803	7510203	DAR_1572	3.64316139818785e-05	0.00214332889568872	1
chr7	16364529	16364929	DAR_1573	NA	NA	4
chr7	43436806	43437206	DAR_1574	3.66630298307105e-05	0.00215425567242668	4
chr1	98129956	98130356	DAR_1575	3.69691619339192e-05	0.00217089088076097	4
chr15	27769189	27769589	DAR_1576	3.70629819997248e-05	0.0021750131501836	4
chr19	5532492	5532892	DAR_1577	3.70854883041049e-05	0.0021750131501836	4
chr2	117417213	117417613	DAR_1578	3.73304356703845e-05	0.00218801827020942	4
chr3	115568284	115568684	DAR_1579	3.73655078983194e-05	0.00218871363563156	2
chr7	123030966	123031366	DAR_1580	3.75156134795236e-05	0.00219614212316166	2
chr19	14588185	14588585	DAR_1581	3.78027000201461e-05	0.00221157520521087	4
chr2	137117108	137117508	DAR_1582	3.79111196085282e-05	0.00221654306070767	1
chr5	67299937	67300337	DAR_1583	3.7939872154931e-05	0.00221684976661405	4
chr11	108271298	108271698	DAR_1584	3.82618829199189e-05	0.00223428073840792	2
chr18	12224313	12224713	DAR_1585	3.83266223661293e-05	0.00223667622245208	2
chr5	17835623	17836023	DAR_1586	3.84200667271209e-05	0.00224037607316131	2
chr1	134189019	134189419	DAR_1587	3.84544022870363e-05	0.00224037607316131	4
chr14	120303183	120303583	DAR_1588	3.84612898559827e-05	0.00224037607316131	4
chr7	68144228	68144628	DAR_1589	3.88150804559094e-05	0.0022595887608367	4
chr3	35764629	35765029	DAR_1590	3.90622626081787e-05	0.00227257544712493	1
chr9	20987926	20988326	DAR_1591	3.91823462445437e-05	0.00227717957781121	2
chr7	141058982	141059382	DAR_1592	3.91967891728572e-05	0.00227717957781121	2
chr10	88712387	88712787	DAR_1593	3.92138402702387e-05	0.00227717957781121	4
chr1	138348490	138348890	DAR_1594	3.94981037266247e-05	0.00229086572456752	4
chr4	32906654	32907054	DAR_1595	3.98020208014491e-05	0.00230707386338184	4
chr4	137774044	137774444	DAR_1596	3.98604496952277e-05	0.00230904141855519	2
chr4	140601147	140601547	DAR_1597	3.99161057960883e-05	0.00231084603395439	4
chr5	66114739	66115139	DAR_1598	4.03718703225497e-05	0.00233579753037343	1
chr3	85126859	85127259	DAR_1599	4.06211344248853e-05	0.00234877824905436	4
chr3	101376850	101377250	DAR_1600	4.08634313902887e-05	0.0023613404559583	2
chr15	100180224	100180624	DAR_1601	4.11718856557161e-05	0.00237770791214551	4
chr3	115996927	115997327	DAR_1602	4.13642669324001e-05	0.00238735613316638	2
chr16	91470473	91470873	DAR_1603	4.13943841998267e-05	0.00238763314417924	4
chr14	56296772	56297172	DAR_1604	4.15269085938249e-05	0.00239381306158793	4
chr4	55526424	55526824	DAR_1605	4.17852707981267e-05	0.00240723490113557	4
chr12	3350473	3350873	DAR_1606	4.18499982429611e-05	0.00240949193180643	4
chr15	58750066	58750466	DAR_1607	4.19286764080972e-05	0.00241114428107901	4
chr15	36361256	36361656	DAR_1608	4.1985618324336e-05	0.00241288099165945	4
chr6	41604359	41604759	DAR_1609	4.22890075333543e-05	0.00242883643937153	4
chr11	53842046	53842446	DAR_1610	4.26696280810963e-05	0.00244920548718439	4
chr11	32162166	32162566	DAR_1611	4.27097949230076e-05	0.0024500198478127	4
chr2	129301185	129301585	DAR_1612	4.29588523421914e-05	0.00246229143215472	4
chr16	32972476	32972876	DAR_1614	4.30632209867069e-05	0.00246579428147745	2
chr10	19333434	19333834	DAR_1615	4.33039233777261e-05	0.00247435764561413	4
chr2	31108186	31108586	DAR_1616	4.3325658715364e-05	0.00247435764561413	2
chr5	113826631	113827031	DAR_1617	4.33307546038786e-05	0.00247435764561413	4
chr1	191085503	191085903	DAR_1618	4.33439599452273e-05	0.00247435764561413	1
chr1	9883027	9883427	DAR_1619	4.34620917335826e-05	0.00247871131171743	4
chr1	30943577	30943977	DAR_1620	4.34727910927146e-05	0.00247871131171743	4
chr11	79460796	79461196	DAR_1621	4.35201980299335e-05	0.00247991499432564	4
chr1	120501499	120501899	DAR_1622	4.37304571609955e-05	0.00249028634903369	4
chr10	67100320	67100720	DAR_1623	4.3755017976914e-05	0.00249028634903369	1
chr5	112279326	112279726	DAR_1624	4.38061987501559e-05	0.00249050650120575	4
chr4	9135801	9136201	DAR_1625	4.38117031132402e-05	0.00249050650120575	2
chr4	46442515	46442915	DAR_1626	4.43291880929614e-05	0.00251840526595356	4
chr16	49936160	49936560	DAR_1627	4.44472227573258e-05	0.00252359075049677	1
chr7	133124018	133124418	DAR_1628	4.4534534225133e-05	0.00252702666616704	4
chr8	13986467	13986867	DAR_1629	4.47087165234243e-05	0.00253538480407371	4
chr1	177634159	177634559	DAR_1630	4.49552505666024e-05	0.00254783342258688	2
chr9	41080904	41081304	DAR_1631	4.50012209731012e-05	0.00254890699478094	2
chr11	75956672	75957072	DAR_1632	4.50310180998433e-05	0.0025490637598691	4
chr2	103145965	103146365	DAR_1633	NA	NA	2
chr16	8836805	8837205	DAR_1634	4.52090677545941e-05	0.0025560740723816	4
chr7	80828452	80828852	DAR_1635	4.52486487657219e-05	0.00255677910074831	4
chr13	46097024	46097424	DAR_1636	4.53172723012866e-05	0.00255887225736575	2
chr3	104771477	104771877	DAR_1637	4.53399593037439e-05	0.00255887225736575	4
chr1	191894398	191894798	DAR_1638	4.54074715258582e-05	0.00256114977104612	1
chr13	48585779	48586179	DAR_1639	4.553507417944e-05	0.00256681185931886	1
chr5	36996476	36996876	DAR_1640	4.59402089104188e-05	0.00258810231882608	4
chr15	64067544	64067944	DAR_1641	4.63492201450885e-05	0.00260958561446141	2
chr16	38653294	38653694	DAR_1642	4.64536518756991e-05	0.00261390486124198	2
chr14	122000723	122001123	DAR_1643	4.65891242937096e-05	0.00261996454667076	4
chr18	67280373	67280773	DAR_1644	4.72410232028137e-05	0.00265345990183904	4
chr7	127144446	127144846	DAR_1645	4.7297445881121e-05	0.00265504775518505	4
chr3	96814372	96814772	DAR_1646	4.75534737560637e-05	0.00266783191523682	4
chr19	53535397	53535797	DAR_1647	4.76560831345566e-05	0.00267121234712904	4
chr14	63193639	63194039	DAR_1648	4.76703784471797e-05	0.00267121234712904	2
chr4	133903422	133903822	DAR_1649	4.77311935159244e-05	0.00267303186870919	4
chr10	5448327	5448727	DAR_1650	4.78544663338955e-05	0.00267834490003008	4
chr4	62551988	62552388	DAR_1651	4.800732835888e-05	0.00268530671147147	4
chr6	100083175	100083575	DAR_1652	4.80637997005644e-05	0.00268687181882699	1
chr11	96504636	96505036	DAR_1653	4.82191765562451e-05	0.00269396083145131	4
chr11	67160154	67160554	DAR_1654	4.84620745216193e-05	0.00270472354638024	2
chr12	25010430	25010830	DAR_1655	4.84691782516951e-05	0.00270472354638024	4
chr10	107868905	107869305	DAR_1656	4.85578696868842e-05	0.00270807038235422	4
chr2	59470686	59471086	DAR_1657	4.86443081715503e-05	0.00271128768955934	4
chr2	38545033	38545433	DAR_1658	4.87924696828241e-05	0.00271793942018789	2
chr9	115526302	115526702	DAR_1659	4.9227090305927e-05	0.00274053081787547	4
chr7	34192808	34193208	DAR_1660	4.96893649016818e-05	0.00276463418040289	4
chr17	29533846	29534246	DAR_1661	5.00680381972302e-05	0.00278206431851295	4
chr6	99031416	99031816	DAR_1662	5.00911407725299e-05	0.00278206431851295	1
chr16	90829882	90830282	DAR_1663	5.04300232290112e-05	0.00279769758775236	2
chr4	8838591	8838991	DAR_1664	5.04319498995728e-05	0.00279769758775236	4
chr2	144239341	144239741	DAR_1665	5.05986464370756e-05	0.00280364662135211	1
chr9	71162946	71163346	DAR_1666	5.07385715774877e-05	0.00280974895464365	4
chr6	85513538	85513938	DAR_1667	5.0949302800203e-05	0.00281962127021018	2
chr9	102616273	102616673	DAR_1668	5.09766429396372e-05	0.00281962127021018	4
chr1	136699106	136699506	DAR_1669	5.13862776068197e-05	0.00283894884725621	4
chr5	110682032	110682432	DAR_1670	5.16592087068083e-05	0.00285164918031411	1
chr15	100720060	100720460	DAR_1671	5.16766353415634e-05	0.00285164918031411	4
chr13	114890605	114891005	DAR_1672	5.20189626992082e-05	0.00286886100308434	2
chr13	48577656	48578056	DAR_1673	5.21672911618318e-05	0.00287535986417234	4
chr8	111417322	111417722	DAR_1674	NA	NA	2
chr7	66839392	66839792	DAR_1675	5.23874920289933e-05	0.00288412563384604	1
chr14	14088056	14088456	DAR_1676	NA	NA	4
chr4	135416414	135416814	DAR_1677	5.30433552880197e-05	0.00291682781757858	4
chr6	138140304	138140704	DAR_1678	5.31242651197429e-05	0.00291957463324452	4
chr12	73720343	73720743	DAR_1679	5.33952415547012e-05	0.0029310506666468	4
chr5	3152102	3152502	DAR_1680	5.34623560120704e-05	0.00293165401402942	4
chr9	69125348	69125748	DAR_1681	5.34684053583574e-05	0.00293165401402942	4
chr5	77443886	77444286	DAR_1682	5.37067086198584e-05	0.00294300904695699	2
chr16	30177709	30178109	DAR_1683	5.37532122082461e-05	0.00294384679658714	4
chr8	95702751	95703151	DAR_1684	5.40547898385337e-05	0.00295757877238777	2
chr15	82027701	82028101	DAR_1685	5.4066673773914e-05	0.00295757877238777	2
chr2	102207926	102208326	DAR_1686	5.43947245756257e-05	0.00297379900901654	2
chr14	73389076	73389476	DAR_1687	5.44982923637874e-05	0.00297681333337948	4
chr7	67958002	67958402	DAR_1688	5.45159024372448e-05	0.00297681333337948	4
chr5	30114351	30114751	DAR_1689	5.45445559723004e-05	0.00297681333337948	2
chr5	66757104	66757504	DAR_1690	5.46424047899467e-05	0.0029804287267354	1
chr1	152019166	152019566	DAR_1691	5.47074387624521e-05	0.00298156113940662	4
chr18	14656880	14657280	DAR_1692	5.47263971106371e-05	0.00298156113940662	2
chr17	72996540	72996940	DAR_1693	5.50128162849802e-05	0.00299543514167877	4
chr2	165270839	165271239	DAR_1694	5.52265503193564e-05	0.00300369151921796	2
chr13	99390059	99390459	DAR_1695	NA	NA	4
chr12	100895530	100895930	DAR_1696	5.5678548847742e-05	0.00302469867867742	4
chr12	110758936	110759336	DAR_1697	5.58371303384568e-05	0.003030346501803	4
chr8	66409986	66410386	DAR_1698	5.58467793497155e-05	0.003030346501803	1
chr18	76248457	76248857	DAR_1699	5.63080240645283e-05	0.00305361749594794	4
chr18	32543092	32543492	DAR_1700	5.68275196341365e-05	0.00307716511256718	4
chr2	128380581	128380981	DAR_1701	5.68401245516455e-05	0.00307716511256718	4
chr12	3322234	3322634	DAR_1702	5.68791713948261e-05	0.00307751234465397	4
chr13	24921257	24921657	DAR_1703	5.70442373793426e-05	0.00308467367805829	4
chr13	20092286	20092686	DAR_1704	5.71016079476196e-05	0.00308600649897775	4
chr2	74749262	74749662	DAR_1705	5.72511040267612e-05	0.00309231378433664	4
chr8	35551625	35552025	DAR_1706	5.73796877639777e-05	0.00309748495361044	2
chr11	117150530	117150930	DAR_1707	5.75053922156435e-05	0.00310249486480589	2
chr10	19503864	19504264	DAR_1708	5.7671943490918e-05	0.0031097015293299	2
chr11	73108209	73108609	DAR_1709	5.78870540432306e-05	0.0031195168032314	4
chr12	35824516	35824916	DAR_1710	5.79532674907955e-05	0.00312130142618758	4
chr2	52558453	52558853	DAR_1711	5.81101955851454e-05	0.00312796701772164	2
chr15	66507877	66508277	DAR_1712	5.82221023217466e-05	0.00313220296842952	4
chr10	25311870	25312270	DAR_1713	5.83777118102867e-05	0.00313699536620667	4
chr4	32424458	32424858	DAR_1714	5.84682914723558e-05	0.00314007355574229	1
chr1	165837552	165837952	DAR_1715	5.86885766554661e-05	0.00315011018705011	4
chr8	13964455	13964855	DAR_1716	5.87644610126e-05	0.00315238909255704	4
chr11	100934201	100934601	DAR_1717	5.94884812336994e-05	0.00318826916288428	4
chr1	138290016	138290416	DAR_1718	5.95009249226073e-05	0.00318826916288428	2
chr2	17741490	17741890	DAR_1719	5.96277210235079e-05	0.00319324899861667	2
chr6	71381634	71382034	DAR_1720	5.99380175920409e-05	0.00320804462261782	4
chr4	129793855	129794255	DAR_1721	6.0528834825102e-05	0.0032378291695127	3
chr13	112349418	112349818	DAR_1722	6.06924746497677e-05	0.00324474218072315	1
chr11	68435661	68436061	DAR_1723	6.07301873392206e-05	0.00324491885405092	2
chr2	32180149	32180549	DAR_1724	6.1125338729739e-05	0.00326418308017299	3
chr2	151575760	151576160	DAR_1725	6.12359533800946e-05	0.00326823942015653	2
chr11	71251369	71251769	DAR_1726	6.1533567937084e-05	0.00328226594538608	4
chr6	124694208	124694608	DAR_1727	6.16228285988443e-05	0.00328516907669373	4
chr3	130901355	130901755	DAR_1728	6.16762321665401e-05	0.00328615843329373	4
chr4	59326387	59326787	DAR_1729	6.18576261908666e-05	0.00329396225476118	4
chr2	69381759	69382159	DAR_1730	6.19028984264631e-05	0.00329451277759845	4
chr8	34142484	34142884	DAR_1731	6.20604370764857e-05	0.00330103420156353	4
chr6	28351151	28351551	DAR_1732	6.2114943261291e-05	0.00330207100008037	4
chr5	92142540	92142940	DAR_1733	6.27525529368678e-05	0.00333295013648666	4
chr4	32365140	32365540	DAR_1734	6.27793213355681e-05	0.00333295013648666	4
chr1	180338394	180338794	DAR_1735	6.28018322344768e-05	0.00333295013648666	4
chr15	60136624	60137024	DAR_1736	6.29369943354383e-05	0.003337457086901	4
chr13	101701936	101702336	DAR_1737	NA	NA	4
chr16	45006985	45007385	DAR_1738	6.30429606724298e-05	0.00334010814164878	4
chr3	115531773	115532173	DAR_1739	6.34193264385549e-05	0.00335791282511542	4
chr16	87723470	87723870	DAR_1740	6.34502280250212e-05	0.00335791282511542	4
chr17	63092790	63093190	DAR_1741	6.36833823997531e-05	0.0033683616062667	2
chr3	84681737	84682137	DAR_1742	6.38737337282038e-05	0.00337464437350461	2
chr2	32724944	32725344	DAR_1743	6.41371738332737e-05	0.00338666542704062	4
chr9	96395164	96395564	DAR_1744	6.42553608164437e-05	0.00339100744964542	4
chr2	120500094	120500494	DAR_1745	6.48819257560836e-05	0.00342215870932829	2
chr15	86342944	86343344	DAR_1746	6.49546733813481e-05	0.00342408070574332	4
chr5	114731958	114732358	DAR_1747	6.52052505217644e-05	0.00343536958712628	4
chr3	157938580	157938980	DAR_1748	6.53520630746544e-05	0.00344118202813034	4
chr6	135324882	135325282	DAR_1749	6.54146528678781e-05	0.0034425556183097	2
chr10	76798884	76799284	DAR_1750	6.54622773677992e-05	0.00344314054195485	4
chr8	57427614	57428014	DAR_1751	6.55205268261092e-05	0.00344364857487191	4
chr18	67391175	67391575	DAR_1752	6.55449668836363e-05	0.00344364857487191	1
chr1	93071503	93071903	DAR_1753	6.56070867635181e-05	0.00344499305757634	2
chr11	67144611	67145011	DAR_1754	6.59152675241937e-05	0.00345924937918983	2
chr7	132773019	132773419	DAR_1755	6.62353035715553e-05	0.00347411166514053	4
chr15	57995933	57996333	DAR_1756	6.67372147634987e-05	0.00349849166909465	4
chr1	37314394	37314794	DAR_1757	6.68886493684918e-05	0.00350275782823583	4
chr11	81973636	81974036	DAR_1758	6.69139159612595e-05	0.00350275782823583	4
chr6	52158161	52158561	DAR_1759	6.69449083238431e-05	0.00350275782823583	1
chr6	119499288	119499688	DAR_1760	6.6967164307095e-05	0.00350275782823583	4
chr1	184024632	184025032	DAR_1761	6.73359680873052e-05	0.00352009597694539	4
chr9	21125682	21126082	DAR_1762	6.74805258204591e-05	0.00352374637239758	2
chr7	73523183	73523583	DAR_1763	6.78518331586803e-05	0.00354020716392116	4
chr3	107000158	107000558	DAR_1764	6.79562262929203e-05	0.00354270195301627	4
chr6	134207795	134208195	DAR_1765	6.80739015978857e-05	0.00354687593259216	1
chr12	85051163	85051563	DAR_1766	6.81463337128658e-05	0.00354868928407468	2
chr1	37113767	37114167	DAR_1767	6.82590605402424e-05	0.00355137151789106	1
chr5	28382292	28382692	DAR_1768	6.82731564140147e-05	0.00355137151789106	4
chr5	28076391	28076791	DAR_1769	6.88323996553934e-05	0.00357651631641939	4
chr6	142884150	142884550	DAR_1771	6.93461019297898e-05	0.00359528468097454	4
chr14	120307148	120307548	DAR_1772	NA	NA	4
chr17	12307713	12308113	DAR_1773	6.98558155826617e-05	0.00361773333341795	1
chr1	90203771	90204171	DAR_1774	6.99000791932547e-05	0.00361803884109674	2
chr13	46715893	46716293	DAR_1775	7.0153933226263e-05	0.00362918649521074	2
chr11	109591540	109591940	DAR_1776	7.0271855028122e-05	0.00363329376761903	4
chr4	128785496	128785896	DAR_1777	7.05006894462263e-05	0.00364312795594809	1
chr18	79064066	79064466	DAR_1778	7.08202183312524e-05	0.00365674358338417	3
chr15	53140284	53140684	DAR_1779	7.08417246529195e-05	0.00365674358338417	4
chr3	95707504	95707904	DAR_1780	7.10354925406124e-05	0.003664232229138	4
chr4	59204673	59205073	DAR_1781	7.10645100267572e-05	0.003664232229138	4
chr1	88587350	88587750	DAR_1782	7.16056430468877e-05	0.00369011660044964	1
chr11	62005070	62005470	DAR_1783	7.18304663813577e-05	0.00369880802465717	2
chr12	111547907	111548307	DAR_1784	7.18696253889028e-05	0.00369880802465717	4
chr9	94945589	94945989	DAR_1785	7.18919603973894e-05	0.00369880802465717	4
chr10	77550985	77551385	DAR_1786	7.19850044088789e-05	0.00370157568745264	4
chr12	3740050	3740450	DAR_1787	7.21183653556586e-05	0.00370535032882176	1
chr16	33708075	33708475	DAR_1788	7.23883995602968e-05	0.00371623995499886	1
chr4	149469513	149469913	DAR_1789	7.27407500634087e-05	0.0037307051448726	4
chr6	38810125	38810525	DAR_1790	7.27492843735959e-05	0.0037307051448726	4
chr9	66990037	66990437	DAR_1791	7.29466277618489e-05	0.0037387921871395	2
chr11	46386494	46386894	DAR_1792	7.32966131109006e-05	0.00375468967552944	4
chr9	13565606	13566006	DAR_1793	7.33569944598509e-05	0.00375574271255438	2
chr8	125651632	125652032	DAR_1794	7.36496666012372e-05	0.00376868101365321	4
chr3	157635704	157636104	DAR_1795	7.37254002649425e-05	0.00377048121724969	4
chr6	91712768	91713168	DAR_1796	7.37648090367171e-05	0.00377048121724969	2
chr13	112809719	112810119	DAR_1797	7.4083544412741e-05	0.00378267288734833	4
chr1	88652627	88653027	DAR_1798	7.43232944055999e-05	0.0037928608904269	4
chr3	84672116	84672516	DAR_1799	7.46087167349934e-05	0.0038053673602634	1
chr12	84762484	84762884	DAR_1800	7.47369307417528e-05	0.00380984633916891	2
chr2	128451525	128451925	DAR_1801	7.50703483540839e-05	0.00382477544150653	1
chr4	150539971	150540371	DAR_1802	7.51821754056319e-05	0.00382840465225644	4
chr11	117092738	117093138	DAR_1803	7.60717229695475e-05	0.00387039751110757	1
chr16	29834752	29835152	DAR_1804	7.60889115929193e-05	0.00387039751110757	2
chr11	5296590	5296990	DAR_1805	7.65097706265967e-05	0.00388970724446493	4
chr3	153895471	153895871	DAR_1806	7.65854370683352e-05	0.00389145625732946	4
chr3	37387377	37387777	DAR_1807	7.67691951353602e-05	0.00389826269073034	1
chr14	58563111	58563511	DAR_1808	7.69725126038771e-05	0.00390481266602143	4
chr3	152912209	152912609	DAR_1809	7.73150408733213e-05	0.00391909535600479	3
chr1	60908792	60909192	DAR_1810	7.73371696430267e-05	0.00391909535600479	2
chr4	45587026	45587426	DAR_1811	7.81494661362406e-05	0.00395388503375024	4
chr4	53591025	53591425	DAR_1812	7.83274775105335e-05	0.00395864384865267	4
chr2	93334330	93334730	DAR_1813	7.87947455341928e-05	0.00398012644193525	2
chr8	123025845	123026245	DAR_1814	7.90384600895098e-05	0.00399029981566456	4
chr16	24838969	24839369	DAR_1815	7.97837851466096e-05	0.00402362001380819	4
chr12	69257834	69258234	DAR_1816	7.99405313480166e-05	0.00402937022439198	4
chr18	4804016	4804416	DAR_1817	8.00993410162228e-05	0.00403521824423981	4
chr12	111442231	111442631	DAR_1818	8.01754575538642e-05	0.00403689635639737	2
chr10	83385410	83385810	DAR_1819	8.02839032508284e-05	0.00404019960719097	2
chr9	123260631	123261031	DAR_1820	8.06529386680617e-05	0.00405579751829368	2
chr5	136155393	136155793	DAR_1821	8.09120644457617e-05	0.00406530317617818	4
chr4	32405125	32405525	DAR_1822	8.22975856142755e-05	0.0041305153839944	2
chr12	54293213	54293613	DAR_1823	8.23437986979279e-05	0.00413063650202419	2
chr2	163228994	163229394	DAR_1824	8.28185072549353e-05	0.00415003451843315	2
chr1	180911926	180912326	DAR_1825	8.29859252753281e-05	0.00415621543013296	4
chr15	9574767	9575167	DAR_1826	8.3355450396011e-05	0.00417250661385171	4
chr9	41181331	41181731	DAR_1827	8.39542440340125e-05	0.00419802380281846	4
chr4	149879935	149880335	DAR_1828	8.40201017085145e-05	0.00419865905806444	4
chr8	94422245	94422645	DAR_1829	8.40559905587673e-05	0.00419865905806444	4
chr18	68227555	68227955	DAR_1830	8.52400550578773e-05	0.00425329834515515	2
chr18	56733793	56734193	DAR_1831	8.56280127771144e-05	0.00426814006393833	1
chr5	110594498	110594898	DAR_1832	8.57819478742363e-05	0.00427355423041501	4
chr13	41903257	41903657	DAR_1833	8.59111390529466e-05	0.00427773061809199	2
chr6	140466278	140466678	DAR_1834	8.61875410396425e-05	0.0042891854843101	4
chr17	86709801	86710201	DAR_1835	8.62563575323568e-05	0.0042891854843101	4
chr15	58145309	58145709	DAR_1836	8.62776343615666e-05	0.0042891854843101	4
chr9	105670000	105670400	DAR_1837	8.66676378229513e-05	0.00430630396215441	4
chr5	149320610	149321010	DAR_1838	8.69964398530891e-05	0.00432036506225659	4
chr11	21172274	21172674	DAR_1839	8.70806797025229e-05	0.00432227245300307	4
chr11	49722665	49723065	DAR_1840	8.84863219020319e-05	0.0043897314884876	4
chr17	88753084	88753484	DAR_1841	8.86045015532039e-05	0.00439328324289064	4
chr17	73869284	73869684	DAR_1842	8.88334564642612e-05	0.00440232095574098	4
chrX	50597106	50597506	DAR_1843	8.89567965872478e-05	0.00440611797045881	4
chr2	69382855	69383255	DAR_1844	8.97330986673825e-05	0.00443990521302458	4
chr6	49930097	49930497	DAR_1845	9.0237805366237e-05	0.00446253629295947	4
chr3	131170258	131170658	DAR_1846	9.04804237231282e-05	0.00447218937109908	4
chr6	114742373	114742773	DAR_1847	NA	NA	2
chr4	43427540	43427940	DAR_1848	9.14115393080876e-05	0.00451111880561372	2
chr2	180439466	180439866	DAR_1849	9.1473874622945e-05	0.00451183404501364	2
chr6	3340986	3341386	DAR_1850	9.19458271304219e-05	0.00453274182916294	4
chr3	101296360	101296760	DAR_1851	9.20267901540906e-05	0.00453436285217441	4
chr8	94802375	94802775	DAR_1852	9.21268275079426e-05	0.00453512242943029	4
chr13	91681046	91681446	DAR_1853	9.21662688081669e-05	0.00453512242943029	2
chr17	7430277	7430677	DAR_1854	9.21929254431675e-05	0.00453512242943029	1
chr12	73046553	73046953	DAR_1855	9.25347766671019e-05	0.00454751286250358	2
chr10	127150469	127150869	DAR_1856	9.26490406128648e-05	0.0045507568088945	4
chr3	106996201	106996601	DAR_1857	9.29043672082688e-05	0.00456092251864144	1
chr19	32409607	32410007	DAR_1858	9.30952265658902e-05	0.0045679144285897	4
chr11	46374978	46375378	DAR_1859	9.33246192310834e-05	0.00457441001342296	4
chr9	52162813	52163213	DAR_1860	9.36461826486987e-05	0.00458778729716926	4
chr15	79516168	79516568	DAR_1861	9.41998268442629e-05	0.00461251457435197	4
chr18	65818919	65819319	DAR_1862	9.42860668070953e-05	0.00461434151654216	4
chr7	75881401	75881801	DAR_1863	9.4351684281329e-05	0.00461515782651416	4
chr14	76781456	76781856	DAR_1864	9.45634399277477e-05	0.00462311784824578	4
chr15	57806217	57806617	DAR_1865	9.49583299096531e-05	0.00464001824807754	4
chr10	119382268	119382668	DAR_1866	9.50872318647813e-05	0.00464150702664179	4
chr3	100480287	100480687	DAR_1867	9.56167730117004e-05	0.0046649410307369	2
chr2	122222306	122222706	DAR_1868	9.58473228581552e-05	0.00467170000585649	2
chr15	5514169	5514569	DAR_1869	9.58543852665476e-05	0.00467170000585649	4
chr11	11678951	11679351	DAR_1870	9.59913111263038e-05	0.00467595691032455	4
chr12	54313114	54313514	DAR_1871	9.60729060079122e-05	0.00467751551207443	2
chr4	148683564	148683964	DAR_1872	9.62082950819827e-05	0.0046816902395751	1
chr12	11200726	11201126	DAR_1873	9.66189715403304e-05	0.00469924979322018	2
chr12	28727054	28727454	DAR_1874	9.67916744708418e-05	0.00470522290944416	2
chr16	57445666	57446066	DAR_1875	9.73413452017837e-05	0.00472950553423216	2
chr2	10372349	10372749	DAR_1876	9.82755783664753e-05	0.00477243819207373	4
chr2	160603332	160603732	DAR_1877	9.92363697297965e-05	0.00481661570772409	1
chr4	97657578	97657978	DAR_1878	9.93204588251753e-05	0.00481821734075402	4
chr16	50372566	50372966	DAR_1880	9.96564414328492e-05	0.00482954780175114	4
chr12	53168455	53168855	DAR_1881	NA	NA	4
chr8	105825564	105825964	DAR_1882	9.98069169583458e-05	0.00483187418767491	4
chr3	68966908	68967308	DAR_1883	0.000100075878092683	0.00484200225259408	4
chr13	112378788	112379188	DAR_1884	0.000100118807644803	0.00484200225259408	2
chr1	128611836	128612236	DAR_1885	0.000100455097965951	0.00485490559566532	2
chr15	77945672	77946072	DAR_1886	0.000100488571609093	0.00485490559566532	4
chr12	12270508	12270908	DAR_1887	0.000100552766741953	0.00485551959709851	1
chr12	116595751	116596151	DAR_1888	0.000100766691205779	0.00486217176677586	2
chr17	7147804	7148204	DAR_1889	0.000100806884763871	0.00486217176677586	4
chr12	102308412	102308812	DAR_1890	0.000100845196812682	0.00486217176677586	4
chr6	121473045	121473445	DAR_1891	0.00010103589682949	0.00486887701701519	4
chr5	33534350	33534750	DAR_1892	0.000101102016964538	0.00486957503262241	1
chr7	135537564	135537964	DAR_1893	0.00010140891230889	0.00487971274799661	2
chr6	72232424	72232824	DAR_1894	0.000101415981698849	0.00487971274799661	4
chr15	84167615	84168015	DAR_1895	0.000101774285055394	0.00489445563524684	2
chr11	68452698	68453098	DAR_1896	0.000102122175441446	0.00490868297622651	4
chr13	93920401	93920801	DAR_1897	0.000102392783807161	0.00491681580083746	4
chr2	126467799	126468199	DAR_1898	0.000102425077682633	0.00491681580083746	4
chr17	84314326	84314726	DAR_1899	0.000102447782758922	0.00491681580083746	4
chr5	66137277	66137677	DAR_1900	0.000102515101966723	0.0049175441104658	1
chr9	38728236	38728636	DAR_1901	0.000102835714206822	0.00493041570905074	4
chr17	36273709	36274109	DAR_1902	0.000103267345427203	0.00494254287280471	4
chr17	71164929	71165329	DAR_1903	0.000103293153819657	0.00494254287280471	2
chr7	101504556	101504956	DAR_1904	0.000103298291773655	0.00494254287280471	4
chr6	49107090	49107490	DAR_1905	0.000104016373425446	0.00497392218896172	2
chr16	87764631	87765031	DAR_1906	0.000104059597684387	0.00497392218896172	4
chr4	116668155	116668555	DAR_1907	0.000104378926512557	0.00498665826880429	2
chr4	98040186	98040586	DAR_1908	0.0001046802623783	0.00499474325497187	4
chr12	102612440	102612840	DAR_1909	0.000104699225519475	0.00499474325497187	4
chr11	53605514	53605914	DAR_1910	0.000104707046296451	0.00499474325497187	2
chr2	27350331	27350731	DAR_1911	0.000104995706930664	0.00500598085617295	2
chr12	76867558	76867958	DAR_1912	0.000105571668963382	0.00503089812275374	4
chr7	80766996	80767396	DAR_1913	0.000105743756488471	0.00503655375917085	3
chr2	91645817	91646217	DAR_1914	0.0001058932729383	0.00504112917263616	4
chr10	21254767	21255167	DAR_1915	0.000106175359331955	0.00505200787715373	4
chr17	29459502	29459902	DAR_1916	0.000106853274789797	0.00507684961733157	4
chr3	88235167	88235567	DAR_1917	0.000106858944621324	0.00507684961733157	1
chr3	107099904	107100304	DAR_1918	0.000107024538501027	0.00507959896950999	4
chr4	49167004	49167404	DAR_1919	0.000107434946316966	0.00509651281806543	2
chr1	69544210	69544610	DAR_1920	0.000107926777581009	0.00511727029327914	4
chr4	136835904	136836304	DAR_1921	0.00010802965255078	0.00511957409201328	2
chr2	173267258	173267658	DAR_1922	0.000108435401142841	0.00513622168537313	2
chr4	137788540	137788940	DAR_1923	0.000108533322082142	0.00513827911927739	3
chr10	84863489	84863889	DAR_1924	0.000108937218895866	0.00515481299669464	2
chr4	135098468	135098868	DAR_1925	0.000109514848797269	0.00517695079976144	4
chr1	20912558	20912958	DAR_1926	0.000110157091850071	0.00520470183422075	4
chr16	22075063	22075463	DAR_1927	0.000110404024466679	0.0052137568028939	4
chr6	31184606	31185006	DAR_1928	0.000110868225525491	0.00523305793024649	4
chr9	21652265	21652665	DAR_1929	0.000111516777736893	0.00525261045627748	2
chr8	110988111	110988511	DAR_1930	0.000111560952462954	0.00525261045627748	4
chr3	9987895	9988295	DAR_1931	0.000111687632121881	0.00525595085954003	4
chr1	60913325	60913725	DAR_1932	0.000112295300185161	0.00528191165813567	2
chr11	71995926	71996326	DAR_1933	0.000112422470451829	0.00528525718888365	4
chr13	48515910	48516310	DAR_1934	0.000112765481799104	0.00529874155058697	1
chr11	34009796	34010196	DAR_1935	0.000113109623183913	0.00531226555458432	4
chr18	65405396	65405796	DAR_1936	0.000113541353034502	0.00532988769568181	4
chr13	18781261	18781661	DAR_1937	0.000113621649191063	0.00533100341804059	1
chr15	93485299	93485699	DAR_1938	0.000113900513840684	0.00534143001430802	2
chr1	181335482	181335882	DAR_1939	0.000114466404650955	0.00536263448753981	4
chr2	164081628	164082028	DAR_1940	0.000114814907787701	0.00537629071933203	4
chr1	120073596	120073996	DAR_1941	0.000114992731294049	0.00538194516632647	4
chr17	50629828	50630228	DAR_1942	0.000115249235792125	0.00539127464278169	4
chr3	52644796	52645196	DAR_1943	0.000115622334540418	0.00540604635771105	4
chr8	35674680	35675080	DAR_1944	0.000116319432450545	0.00543325245968974	4
chr5	111124727	111125127	DAR_1945	0.000116573889901401	0.00544244249254032	1
chr1	184042701	184043101	DAR_1946	0.00011682833557671	0.00545162288136207	4
chr4	101213501	101213901	DAR_1947	0.00011769847372864	0.00548951036692723	2
chr11	121706498	121706898	DAR_1948	0.000117853478142177	0.00549402272029378	4
chr7	79419917	79420317	DAR_1949	0.000118086649860825	0.00550217277096087	2
chr5	77125028	77125428	DAR_1950	0.00011814905330179	0.00550236186159601	4
chr18	60643511	60643911	DAR_1951	0.000119040274552064	0.00553839722357253	4
chr6	136491106	136491506	DAR_1952	0.000119161226543181	0.00554129082426419	4
chr14	27341279	27341679	DAR_1953	0.000119573333620784	0.00555497653880554	2
chr15	97342402	97342802	DAR_1954	0.000120403401236464	0.00558952062954844	2
chr6	86879384	86879784	DAR_1955	0.000120435449322345	0.00558952062954844	4
chr8	86862346	86862746	DAR_1956	0.000120878795871635	0.00560458043375923	2
chr6	7693053	7693453	DAR_1957	0.000121659522181433	0.0056380071539874	2
chr18	56888762	56889162	DAR_1958	0.000122105501745889	0.00565589565478856	4
chr19	18646845	18647245	DAR_1959	0.000122259412944063	0.0056602447012841	2
chr7	127973671	127974071	DAR_1960	0.000122692804418225	0.00567752223075053	4
chr10	84632060	84632460	DAR_1961	0.000123134206482623	0.00569365066107791	4
chr1	130987451	130987851	DAR_1962	0.000123162091346336	0.00569365066107791	3
chr15	6554736	6555136	DAR_1963	0.000123779208670367	0.00571657484430767	4
chr16	4404977	4405377	DAR_1964	0.000123846825819065	0.00571689799438013	4
chr2	61580677	61581077	DAR_1965	0.000124199295567576	0.0057275613531009	4
chr1	80748941	80749341	DAR_1966	0.000124557590477182	0.00573879126632276	4
chr16	35068895	35069295	DAR_1967	0.000124582214726083	0.00573879126632276	2
chr11	114672713	114673113	DAR_1968	0.000124913018926885	0.00574922990528926	4
chr12	102652337	102652737	DAR_1969	0.000125441087879957	0.00577071837790003	2
chr13	24786164	24786564	DAR_1970	0.000125759611540881	0.00578255079745778	1
chr3	153190037	153190437	DAR_1971	0.000125852029802033	0.00578360110188707	2
chr9	96935932	96936332	DAR_1972	0.000125905108445547	0.00578360110188707	4
chr11	106564299	106564699	DAR_1973	0.000126472100197083	0.00580064868603727	2
chr15	77071480	77071880	DAR_1974	0.000126522255476037	0.00580064868603727	4
chr4	145229106	145229506	DAR_1975	0.000127506888878845	0.00584295051967794	4
chr7	46998942	46999342	DAR_1976	0.000127912888095401	0.00585870846897181	2
chr16	43661508	43661908	DAR_1977	0.00012821821845151	0.0058675509726667	1
chr12	9040160	9040560	DAR_1978	0.000128273068709128	0.0058675509726667	2
chr13	43177379	43177779	DAR_1979	0.000128292598700401	0.0058675509726667	4
chr1	154326178	154326578	DAR_1980	0.000128760773516644	0.00588610870966268	4
chr15	97780719	97781119	DAR_1981	0.00012885233506954	0.00588744048614492	4
chr4	141765009	141765409	DAR_1982	0.000128933807908277	0.00588831022876798	1
chr15	58594877	58595277	DAR_1983	0.000129120734670805	0.00589399279990302	4
chr15	80590681	80591081	DAR_1984	0.000129644944184301	0.00591505841857229	4
chr18	80312745	80313145	DAR_1985	0.000129843088951009	0.00592123413428568	2
chr17	36971456	36971856	DAR_1986	0.000130291697805988	0.0059388202730736	4
chr18	61188057	61188457	DAR_1987	0.000130557444949207	0.00594805843518111	4
chr5	102825339	102825739	DAR_1988	0.000130839977442023	0.00595805202927324	4
chr12	84129981	84130381	DAR_1989	0.000131186016308679	0.00597092646719238	4
chr1	64085893	64086293	DAR_1990	0.000131448327200575	0.0059766119413393	4
chr4	132611291	132611691	DAR_1991	0.000131455294258604	0.0059766119413393	1
chr10	119005496	119005896	DAR_1992	0.000131501052713786	0.0059766119413393	4
chr9	66882518	66882918	DAR_1993	0.000132611437727121	0.00602127436578316	2
chr2	157447208	157447608	DAR_1994	0.000132915146229572	0.00603216010369212	2
chr6	65573472	65573872	DAR_1995	0.000133928858147233	0.00607232155062072	4
chr8	33668238	33668638	DAR_1996	0.000134116937217052	0.00607414634407067	4
chr11	46405030	46405430	DAR_1997	0.000134178644213814	0.00607414634407067	4
chr17	51879199	51879599	DAR_1998	0.000134210846810582	0.00607414634407067	4
chr16	11675983	11676383	DAR_1999	0.000134291146228672	0.00607414634407067	2
chr5	107201796	107202196	DAR_2000	0.000134432145071643	0.00607760896705245	4
chr14	67211686	67212086	DAR_2001	0.000135354407365516	0.00611637187130795	4
chr19	44314494	44314894	DAR_2002	0.000136416320163675	0.00616140512723931	1
chr11	71230651	71231051	DAR_2003	0.000136968996531394	0.00618340601047685	3
chr14	25454360	25454760	DAR_2004	0.000137170561680638	0.00618667746843993	4
chr16	8747745	8748145	DAR_2005	0.000137172665724791	0.00618667746843993	2
chr7	24382875	24383275	DAR_2006	0.000137598002626614	0.00620289427997517	2
chr11	62752735	62753135	DAR_2007	0.000137684766743054	0.00620384008468095	4
chr17	25248179	25248579	DAR_2008	NA	NA	4
chr6	100563600	100564000	DAR_2009	NA	NA	2
chr3	52842917	52843317	DAR_2010	0.00013806442862011	0.00621204297226944	4
chr11	72782107	72782507	DAR_2011	0.000138388470318388	0.00622117997641223	2
chr16	21835632	21836032	DAR_2012	0.000138859806339193	0.00623830981968903	4
chr12	25013107	25013507	DAR_2013	0.000138912812636888	0.00623830981968903	4
chr9	122233244	122233644	DAR_2014	0.000139853373833361	0.00627755931751677	4
chr7	43606931	43607331	DAR_2015	0.000140232578152304	0.00629158598849158	4
[truncated: 283 more rows]
