# Supplementary material for: Tlr7-biallelism defines a hyperfunctional state of female B lymphocytes
Source: Research Square preprint supplement (doi:10.21203/rs.3.rs-8306714/v1), 2025-12-10
Supplement: Supplementary file 2 [file 8eda1f79d1ba53e0b32a88e2.xlsx]

## Sheet: activated BiA vs MonoA
Supplementary Table 3: Differentially expressed genes (DEGs) between 6 hours stimulated Tlr7 mono and biallelic CD19+ splenic IgD+ B cells
gene_name	baseMean	log2FoldChange	lfcSE	stat	pvalue	padj	ensembl_gene_id	BiA1_TPM	BiA2_TPM	BiA3_TPM	MonoA1_TPM	MonoA2_TPM	MonoA3_TPM	MonoA4_TPM	MonoA5_TPM	MonoA6_TPM	BiA1_raw.counts	BiA2_raw.counts	BiA3_raw.counts	MonoA1_raw.counts	MonoA2_raw.counts	MonoA3_raw.counts	MonoA4_raw.counts	MonoA5_raw.counts	MonoA6_raw.counts	BiA1_norm.counts	BiA2_norm.counts	BiA3_norm.counts	MonoA1_norm.counts	MonoA2_norm.counts	MonoA3_norm.counts	MonoA4_norm.counts	MonoA5_norm.counts	MonoA6_norm.counts
Jchain	574.135	6.44561	0.26425	24.392	2.07709e-131	2.92974e-127	ENSMUSG00000067149	75.3409	49.6513	56.1636	0.25764	1.11188	0.855881	0.566496	0.607028	0.823092	2517	1321	1074	7	22	37	18	15	26	2054.48	1430.04	1566.04	7.20414	30.3236	23.4584	14.8617	17.4697	23.3336
Igkv5-39	220.468	3.07391	0.234792	13.092	3.6567e-39	2.57888e-35	ENSMUSG00000076569	143.454	119.075	218.368	18.6113	18.0162	19.8297	17.7229	18.009	22.7957	626	393	550	62	44	80	79	48	78	467.166	409.567	727.149	62.1488	58.6776	64.9063	55.5255	61.8945	77.1741
Gm4767	50.5244	-6.11888	0.819046	-7.47074	7.97435e-14	3.74927e-10	ENSMUSG00000094076	0.056732	0	0	3.47817	3.27042	2.17759	2.23498	0.834963	1.3962	7	0	0	103	69	86	77	18	45	1.86874	0	0	119.765	110.481	73.3368	71.9978	29.0565	48.2139
Igha	374.188	4.32781	0.604228	7.16254	7.91967e-13	2.79267e-09	ENSMUSG00000095079	49.4686	6.42528	22.3564	0.832126	1.10658	2.53848	1.12814	1.0255	1.13764	1325	172	372	43	42	181	66	41	67	1915.39	262.765	885.129	33.0382	42.8512	98.791	42.0235	41.9055	45.7925
Eif4ebp1	2654.36	-0.754831	0.120788	-6.2492	4.12552e-10	1.16381e-06	ENSMUSG00000031490	92.2279	68.0099	77.2363	135.6	133.824	140.312	156.013	129.487	115.32	2583	1659	1181	3200	2239	4737	3985	2348	3057	2071.53	1613.42	1773.89	3123.1	3006.18	3167.67	3371.24	3069.45	2692.74
Trbc2	12.9321	6.74341	1.1294	5.97081	2.36079e-09	5.54982e-06	ENSMUSG00000076498	2.49148	4.65508	3.25133	0	0	0	0	0.249401	0	34	50	26	0	0	0	0	2	0	26.2481	52.0796	35.2801	0	0	0	0	2.78126	0
Tcf7	37.1011	3.35993	0.573633	5.85728	4.70511e-09	8.2957e-06	ENSMUSG00000000782	1.20929	2.90622	1.41691	0.11513	0.162911	0.317916	0.049916	0.128912	0.307267	75	145	50	6	6	22	3	5	17	59.1057	150.029	70.8137	5.77017	7.96351	15.6181	2.34716	6.64967	15.6127
Mki67	195.976	2.69173	0.458886	5.86579	4.46986e-09	8.2957e-06	ENSMUSG00000031004	1.31512	3.90069	0.817679	0.324919	0.392309	0.18974	0.165677	0.511267	0.325407	360	863	126	74	63	57	43	87	81	282.029	883.523	179.303	71.4501	84.1414	40.898	34.1815	115.713	72.5466
Csf2rb	110.788	1.96068	0.340007	5.76659	8.08937e-09	1.26778e-05	ENSMUSG00000071713	2.56977	1.51934	2.43947	0.513429	0.215581	0.598226	0.605196	0.739071	0.684058	305	157	173	54	16	82	75	58	80	254.031	158.802	246.611	52.0409	21.3122	59.3204	57.5523	77.1008	70.3232
Igkv8-30	101.735	2.00068	0.365932	5.46735	4.56813e-08	6.44335e-05	ENSMUSG00000076577	65.1491	58.2174	33.9433	9.0969	13.9088	6.57067	13.8787	19.0221	17.3386	318	215	101	34	38	35	69	56	74	245.816	231.77	131.105	35.2357	52.5453	24.7823	50.4918	75.8323	68.0405
Ighv11-2	95.6334	2.32075	0.435186	5.33277	9.67245e-08	0.000124027	ENSMUSG00000096108	29.6012	55.0713	20.5678	3.33884	7.76886	8.54361	3.82651	7.95676	11.3217	217	309	90	19	32	69	28	34	73	167.112	328.376	118.73	19.3282	43.8641	48.6537	20.7827	47.4068	66.4465
Cd3g	16.8702	5.7602	1.08431	5.31234	1.08229e-07	0.000127214	ENSMUSG00000002033	1.4429	4.75803	1.67631	0	0	0	0	0.291505	0.048625	33	87	22	0	0	0	0	4	1	25.6513	89.3404	30.4721	0	0	0	0	5.46921	0.898659
Samd9l	273.284	2.36615	0.451085	5.24546	1.55892e-07	0.000169142	ENSMUSG00000047735	1.70621	12.0248	3.23775	0.946965	1.58238	1.38842	1.21279	0.838298	0.873356	243	1382	260	112	49	217	164	74	113	170.41	1268.49	330.66	96.9829	158.062	139.379	116.533	88.3624	90.681
Sowahc	419.93	0.769357	0.150054	5.12719	2.94101e-07	0.000296307	ENSMUSG00000098188	5.59375	6.01834	6.58954	3.03092	3.73456	3.41099	3.64785	3.8861	3.89032	665	577	442	299	260	445	412	286	420	520.521	591.505	626.998	289.207	347.558	319.029	326.567	381.641	376.341
Kdm7a	814.497	1.1071	0.21977	5.03752	4.71596e-07	0.000443458	ENSMUSG00000042599	4.40385	8.53842	5.52011	2.33016	2.5836	3.16721	2.83936	3.13743	3.3591	1145	1572	808	504	391	864	700	507	790	878.234	1798.47	1125.65	476.499	515.295	634.848	544.753	660.326	696.407
Ptch1	739.114	0.751364	0.150454	4.99398	5.9148e-07	0.000496052	ENSMUSG00000021466	8.24742	7.99507	8.55316	4.52338	4.44018	5.24962	4.38886	5.84485	5.26764	1159	860	703	622	397	820	659	614	818	985.66	1009.2	1045.23	554.333	530.716	630.596	504.616	737.206	654.466
Ccl5	71.2	2.64227	0.52931	4.99191	5.97865e-07	0.000496052	ENSMUSG00000035042	26.2711	17.99	21.7456	2.1974	1.14524	2.10387	2.29188	4.16812	9.11522	244	129	119	16	6	22	21	23	75	188.938	136.653	159.914	16.205	8.23737	15.2081	15.8575	31.6364	68.1507
Arid1b	2063.95	0.544895	0.111934	4.86802	1.12722e-06	0.000883303	ENSMUSG00000069729	11.9833	12.9928	13.885	9.83551	8.12808	8.92642	9.76398	8.77735	8.48016	2884	2677	1916	1934	1085	2630	2269	1477	2097	2353.94	2695.68	2788.94	1981.13	1596.83	1762.42	1845.2	1819.64	1731.74
Bub1	30.0818	2.26381	0.470574	4.81075	1.50364e-06	0.00111625	ENSMUSG00000027379	1.39771	0.922079	1.19738	0.175443	0.344037	0.234359	0.281327	0.362121	0.110901	125	61	21	13	18	23	6	20	9	73.856	51.4619	64.6959	9.50616	18.1814	12.4471	14.3015	20.1943	6.09212
Cd36	478.111	1.11973	0.234229	4.78052	1.74844e-06	0.00123309	ENSMUSG00000002944	12.5768	12.5368	14.8432	5.24272	4.0817	6.49024	8.36575	4.67946	8.31657	882	716	581	306	172	494	547	198	531	688.438	724.813	830.797	294.271	223.453	357.082	440.553	270.331	473.259
Cd80	137.005	1.32276	0.279748	4.72841	2.26283e-06	0.00151987	ENSMUSG00000075122	3.33553	4.27031	3.99454	1.32006	1.83053	1.73377	0.89195	1.92326	1.67493	249	213	185	70	85	150	61	90	113	191.416	258.834	234.4	77.6795	105.061	100.004	49.2442	116.482	99.9244
Rab11fip4	62.5943	1.9184	0.407895	4.70317	2.56154e-06	0.00155754	ENSMUSG00000017639	0.660779	1.1543	0.653362	0.24295	0.194311	0.19819	0.120083	0.183515	0.38172	113	166	58	39	22	42	22	22	67	95.5285	176.255	96.5844	36.0158	28.0949	28.7988	16.7016	27.9998	57.3698
Egr3	391.679	0.906215	0.192967	4.69622	2.65019e-06	0.00155754	ENSMUSG00000033730	7.23695	6.26661	7.40145	2.93368	3.43343	3.13645	4.11599	3.99427	4.89723	738	518	427	247	204	350	395	251	451	576.066	526.862	602.434	239.457	273.337	250.94	315.204	335.552	405.256
Vma21	1350.96	0.578885	0.123251	4.69682	2.64247e-06	0.00155754	ENSMUSG00000073131	27.7046	25.4005	25.5109	19.1543	15.5286	16.5391	20.2942	15.9545	19.002	2104	1426	1165	1452	792	1659	1651	844	1326	1786.88	1730.09	1682.44	1266.61	1001.53	1072.03	1259.32	1085.84	1273.91
Psmd4	7701.14	-0.460309	0.0990023	-4.64948	3.32775e-06	0.00174293	ENSMUSG00000005625	253.919	236.814	251.461	334.257	372.241	380.573	341.772	336.534	301.094	7825	5913	4499	8499	6698	13011	10268	6369	8445	6162.79	6070.68	6240.66	8318.84	9035.68	9284.02	7980.31	8620.21	7597.08
Tmem222	1717.17	-0.524694	0.112878	-4.64833	3.34636e-06	0.00174293	ENSMUSG00000028857	55.0153	45.355	51.7546	74.9767	85.043	68.4675	74.369	71.4363	68.4001	1847	1159	972	2014	1556	2414	2375	1459	2055	1406.18	1224.42	1352.64	1965.09	2173.95	1758.97	1828.73	1927.01	1817.51
Cd24a	1940.71	0.902546	0.19397	4.65301	3.27125e-06	0.00174293	ENSMUSG00000047139	61.7396	94.5834	77.5117	44.9429	31.9314	45.322	38.7975	38.873	53.5449	2771	3399	1976	1661	835	2232	1664	1067	2174	2163.28	3500.35	2777.1	1614.76	1118.97	1596.15	1307.84	1437.48	1950.42
Gm10778	227.31	0.791439	0.170516	4.64144	3.45991e-06	0.00174293	ENSMUSG00000096856	3.43903	3.32612	3.36515	1.79063	2.16271	2.36611	2.07271	1.6376	1.81513	371	200	239	187	159	327	248	128	208	314.676	321.051	314.463	167.685	197.063	217.393	182.323	158.325	172.81
Ms4a4b	211.331	1.31466	0.285362	4.607	4.08522e-06	0.00198697	ENSMUSG00000056290	12.6594	17.8978	16.5775	7.90925	4.82264	4.24378	5.71012	6.05766	9.67786	375	407	259	152	79	177	157	102	189	274.653	410.999	367.433	175.891	104.542	92.5456	119.147	138.594	218.176
Nedd4	274.072	1.14583	0.252406	4.53962	5.63551e-06	0.00264963	ENSMUSG00000032216	3.23043	5.23888	5.5891	2.48043	2.61847	1.78924	1.58074	1.88582	2.51976	434	414	356	222	135	221	198	147	289	289.022	495.059	511.315	227.561	234.299	160.9	136.06	178.064	234.364
D8Ertd738e	3138.8	-0.529225	0.116911	-4.52672	5.99064e-06	0.00272574	ENSMUSG00000019362	266.104	266.447	259.067	368.564	434.559	373.242	342.707	406.554	384.368	3082	2402	1756	3392	2865	4743	3894	2741	3957	2380.02	2517.02	2369.29	3380.18	3887.14	3355.32	2948.85	3837.55	3573.87
Pla2g7	7.70238	7.00123	1.56569	4.47165	7.76183e-06	0.00342127	ENSMUSG00000023913	0.056946	1.38449	0.267775	0	0	0	0	0	0	3	48	8	0	0	0	0	0	0	2.20158	56.5341	10.5857	0	0	0	0	0	0
Hk2	2326.04	0.54052	0.121766	4.43901	9.03747e-06	0.00386283	ENSMUSG00000000628	43.9579	36.5597	39.4827	29.1325	25.8164	23.7765	29.4563	28.2202	30.234	3958	2556	1807	2145	1703	2529	2462	1732	2322	3150.53	2767.56	2893.54	2141.03	1850.53	1712.81	2031.07	2134.59	2252.71
Psmc4	12702	-0.492677	0.111608	-4.41435	1.01315e-05	0.00420308	ENSMUSG00000030603	393.756	375.214	363.564	542.066	616.871	580.933	549.039	491.892	447.97	13210	9732	6916	14772	11813	20884	17389	9931	13410	10157.5	10223.2	9589.93	14338.7	15915	15062.6	13625.8	13391.7	12013.5
Nid1	41.5068	2.19026	0.50454	4.3411	1.41773e-05	0.0055302	ENSMUSG00000005397	1.02154	0.568051	1.05439	0.183983	0.114756	0.12258	0.397083	0.078859	0.29607	76	75	46	25	11	22	21	8	44	97.8652	57.4786	103.288	18.0737	10.9951	11.8033	36.5978	7.97315	29.4869
Sun2	314.346	1.2956	0.298638	4.33838	1.43534e-05	0.0055302	ENSMUSG00000042524	7.20575	13.2429	4.23993	4.19259	3.42093	3.21512	3.02164	3.61647	3.03004	491	652	163	307	168	295	245	194	226	439.773	853.731	264.596	262.38	208.808	197.225	177.416	232.938	192.247
Hba-a1	38.3922	3.37362	0.77804	4.33605	1.45067e-05	0.0055302	ENSMUSG00000069919	6.26319	6.93265	14.9681	0.155671	0.35624	0.674344	1.63533	0	2.49785	87	75	121	1	3	10	22	0	31	63.2381	73.5197	154.663	1.61064	3.81236	6.65974	15.7711	0	26.2554
Ly6a	629.407	0.809748	0.187273	4.32388	1.53307e-05	0.0056905	ENSMUSG00000075602	58.6308	47.135	60.5987	25.805	31.7582	25.0749	32.2548	36.8354	39.6532	1180	747	694	417	368	541	621	442	715	910.099	772.769	961.83	410.734	493.024	391.213	481.675	603.435	639.882
Psma7	19674.6	-0.479927	0.111363	-4.30957	1.63571e-05	0.00591581	ENSMUSG00000027566	1091.15	899.475	985.103	1372.97	1481.01	1622.28	1319.91	1336.51	1253.98	21534	14051	11249	22001	16823	35006	25106	15790	22150	16725.2	14562.2	15440	21579.8	22703.9	24993.7	19464.1	21620.6	19982.2
Lck	4274.15	-0.639038	0.148768	-4.29552	1.74282e-05	0.00614562	ENSMUSG00000000409	90.2116	83.171	74.5247	128.29	156.439	103.047	153.338	131.081	110.488	4317	3110	1974	5092	4301	5284	6657	3835	4719	3315.8	3228.83	2800.93	4835.24	5750.76	3806.93	5422.21	5084.77	4221.86
Mettl1	6723.52	-0.3831	0.0896454	-4.27351	1.92424e-05	0.00661985	ENSMUSG00000006732	218.482	190.94	216.337	280.73	292.539	262.826	273.569	276.056	263.506	7413	5170	4209	7570	5669	9669	8594	5645	8008	5712.27	5272.75	5783.62	7526.26	7649.44	6906.78	6881.13	7617.22	7162.17
Gna11	455.242	-0.614054	0.143966	-4.26526	1.99669e-05	0.00670555	ENSMUSG00000034781	6.67767	5.19479	6.04477	10.1765	9.40295	8.7903	9.88792	7.67818	9.53905	524	308	285	519	359	635	572	350	630	366.984	301.535	339.687	573.479	516.82	485.558	522.791	445.335	544.992
Celf2	3194.55	0.526183	0.124002	4.24333	2.20226e-05	0.00705975	ENSMUSG00000002107	35.5832	40.321	43.906	29.2159	24.4462	29.1532	30.7276	25.0436	29.8955	4328	3634	3242	3080	1759	3983	3626	2091	3493	3481.59	4166.88	4392.7	2931.23	2392.19	2867.03	2892.42	2586.04	3040.88
Mef2a	3251.5	0.485146	0.114255	4.24616	2.17463e-05	0.00705975	ENSMUSG00000030557	38.0132	40.8605	39.2953	28.9204	29.1126	32.0955	26.0312	28.9066	25.7938	4868	4096	3000	3054	2003	4473	3125	2249	3065	3774.41	4284.46	3989.3	2944.49	2891	3203.06	2486.06	3028.66	2662.09
Irf2	1386.06	0.560016	0.132545	4.22509	2.38842e-05	0.00748637	ENSMUSG00000031627	69.5285	68.5675	82.4426	45.9318	47.4514	48.7468	48.8096	53.6504	57.2475	1961	1613	1218	1103	830	1642	1452	1035	1784	1627.6	1695.31	1973.38	1102.54	1110.93	1146.95	1099.23	1325.45	1393.16
Pdia6	16261.2	-0.347653	0.0827511	-4.20118	2.65522e-05	0.00786759	ENSMUSG00000020571	352.497	305.401	322.54	426.999	437.434	416.123	448.778	412.072	382.271	18493	12890	9706	18517	13425	23820	22433	13375	18174	14480.9	13251.3	13548.7	17987.2	17972.3	17182.1	17736.6	17865.7	16325.7
Kynu	76.5426	1.10831	0.264053	4.1973	2.70116e-05	0.00786759	ENSMUSG00000026866	2.42886	1.69674	2.5115	0.876627	0.849307	1.17828	1.14951	1.03748	1.09769	158	87	100	51	35	74	77	45	70	128.081	94.5029	135.422	47.4019	44.7919	62.4519	58.317	57.7388	60.1761
Slfn8	812.013	0.562866	0.134187	4.19463	2.73316e-05	0.00786759	ENSMUSG00000035208	14.4768	11.9595	14.9958	10.0954	9.85237	10.2402	9.71185	7.45202	9.3271	1403	896	815	757	526	1031	856	437	804	1059.44	924.793	1122.68	757.243	720.736	753.547	684.2	576.216	709.263
Gvin1	593.094	1.45773	0.347075	4.20005	2.66857e-05	0.00786759	ENSMUSG00000045868	3.55318	7.07342	5.36717	1.08849	1.24009	3.67196	2.66456	1.35242	1.88568	848	1364	722	216	174	963	603	202	410	665.187	1398.58	1027.82	208.887	232.735	690.802	479.842	266.734	367.266
Casz1	210.076	0.89846	0.214972	4.17942	2.92247e-05	0.00808264	ENSMUSG00000028977	2.6914	3.25071	1.97359	1.6722	1.22953	1.46281	1.49522	1.52462	1.23825	371	318	172	159	103	263	236	142	162	301.279	384.349	225.909	191.95	137.655	164.589	161.029	180.123	143.799
Cxcr6	12.2532	2.86219	0.684668	4.18041	2.90989e-05	0.00808264	ENSMUSG00000048521	0.721403	0.688111	0.891785	0.077255	0	0.154694	0.133281	0.138646	0.116548	34	26	24	3	0	8	6	4	5	26.6029	26.8013	33.6268	2.9213	0	5.73373	4.72844	5.3959	4.46805
Lnpep	3227.57	0.535257	0.128299	4.17194	3.02012e-05	0.00819209	ENSMUSG00000023845	18.1565	16.157	20.9187	12.7336	12.074	13.5841	11.8371	12.0443	14.6283	4909	3384	3408	3004	1737	4135	3177	2098	3890	3915.33	3679.96	4612.61	2815.71	2604.01	2944.29	2455.74	2741.11	3279.39
Psmb6	9672.11	-0.39241	0.0944114	-4.15638	3.23325e-05	0.00844881	ENSMUSG00000018286	666.755	607.462	634.437	784.595	969.149	809.902	874.222	815.279	816.868	10555	7571	5820	10007	8807	14061	13448	7619	11540	8179.75	7871.18	7958.63	9870.01	11891	9986.68	10318	10555.7	10418.1
Prkcb	6537.56	0.416206	0.100139	4.15629	3.23457e-05	0.00844881	ENSMUSG00000052889	181.987	167.521	204.066	133.579	130.575	138.129	157.236	138.001	141.51	9709	7243	5836	5878	4453	7535	8200	4405	6744	7551.25	7341.67	8658.15	5683.49	5418.67	5760.76	6276.71	6043.19	6104.18
Pycrl	2089.65	-0.555947	0.134382	-4.13707	3.51773e-05	0.00886747	ENSMUSG00000022571	74.0475	53.1581	61.8183	97.6846	110.33	92.4907	88.057	89.7262	83.0135	2343	1342	1116	2532	2027	3211	2673	1722	2370	1826.14	1384.65	1558.9	2470.3	2721.27	2292.65	2089.24	2335.34	2128.31
Mmp10	5.45239	6.51613	1.57513	4.13688	3.52058e-05	0.00886747	ENSMUSG00000047562	1.04086	0.295403	0.124861	0	0	0	0	0	0	44	10	3	0	0	0	0	0	0	34.4986	10.3412	4.23168	0	0	0	0	0	0
Mbd4	185.587	0.820704	0.198737	4.12959	3.63405e-05	0.00899268	ENSMUSG00000030322	3.85332	4.10079	5.25581	2.24192	2.64972	2.40303	3.14908	2.53762	2.11709	294	249	198	156	120	138	225	127	162	223.014	250.456	311.614	133.467	154.003	139.967	175.441	155.125	127.197
Stat1	1033.85	0.89202	0.216412	4.12186	3.75822e-05	0.0091396	ENSMUSG00000026104	19.7006	19.2007	27.654	9.78917	14.272	8.04527	12.4696	12.3075	15.59	1750	1185	1412	669	591	732	1114	678	1161	1292.4	1330.01	1855.03	658.28	936.38	530.482	786.707	852.1	1063.22
Hivep1	1944.39	1.09512	0.268998	4.07111	4.679e-05	0.0109343	ENSMUSG00000021366	14.6144	29.218	11.4991	8.43699	7.78836	12.5733	7.07853	8.59716	8.27781	2677	4123	1398	1569	744	2866	1427	1165	1711	2308.17	4874	1857.07	1366.39	1230.23	1995.96	1075.55	1433.01	1359.14
Fcrl5	1065.24	0.795301	0.195471	4.06864	4.72878e-05	0.0109343	ENSMUSG00000048031	33.0234	22.9333	33.3652	13.3512	17.7919	14.5652	15.8763	20.6482	21.3184	2056	1151	1180	689	649	991	945	793	1201	1609.44	1180.5	1662.73	667.225	867.217	713.485	744.396	1062.04	1080.12
Il2rb	21.2286	2.75025	0.675448	4.07175	4.66617e-05	0.0109343	ENSMUSG00000068227	0.667337	0.86128	0.367507	0.032614	0.030805	0.209997	0.066429	0.160325	0.070427	74	77	23	3	2	17	7	11	3	50.3065	68.5757	28.3283	2.52104	2.3225	15.9114	4.81768	12.7552	5.51923
Icos	4.51619	6.23898	1.53687	4.05953	4.91723e-05	0.0111867	ENSMUSG00000026009	0.236866	0.235341	0.125735	0	0	0	0	0	0	20	16	6	0	0	0	0	0	0	15.68	16.4547	8.51092	0	0	0	0	0	0
Ccl22	26.8127	2.50418	0.618247	4.05045	5.11196e-05	0.0112663	ENSMUSG00000031779	0.982408	1.73514	1.19753	0.151469	0.520323	0.113946	0.074906	0.407306	0.177487	55	78	38	7	17	7	4	14	9	42.9764	80.1716	53.5674	6.79454	22.7648	5.01016	3.15251	18.8046	8.07175
Arl16	782.922	-0.620215	0.153069	-4.05186	5.08126e-05	0.0112663	ENSMUSG00000057594	29.7289	26.6927	30.2648	42.2763	56.2242	39.8081	50.2029	35.6346	45.883	748	553	413	921	787	1088	1147	552	1029	578.563	548.671	602.262	843.659	1094.33	778.678	939.943	731.896	928.294
Lin37	670.214	-0.600837	0.148586	-4.04371	5.26122e-05	0.0114168	ENSMUSG00000036845	37.4756	35.0054	40.4863	55.0704	65.7828	46.2644	63.9989	52.8867	62.5505	702	483	354	692	627	830	974	604	871	484.025	477.531	534.691	729.35	849.736	600.602	795.228	720.894	839.869
Psmb3	12106.4	-0.400225	0.0994734	-4.02344	5.73545e-05	0.0122574	ENSMUSG00000069744	855.932	690.652	832.934	1060.88	1072.55	1134.58	1015.79	1054.15	1002.45	13570	8642	7645	13511	9755	19820	15631	9840	14175	10514.3	8960.84	10462.5	13363.1	13177	14007.9	12004	13666.5	12801.2
Bmt2	2289.97	0.473	0.117818	4.01468	5.95274e-05	0.0125318	ENSMUSG00000042742	30.2345	31.8137	33.4855	22.8007	21.3758	26.9222	22.8297	20.8845	24.4089	3330	2839	2078	2078	1377	3251	2384	1420	2438	2604.23	2894.27	2949.24	2013.83	1841.42	2330.78	1891.81	1898.49	2185.68
Ahnak	290.262	1.52004	0.379689	4.00339	6.24425e-05	0.0129522	ENSMUSG00000069833	0.965968	1.94082	1.24	0.241679	0.353143	0.86067	0.375972	0.355622	0.751035	457	780	226	100	103	461	177	110	271	347.216	736.835	455.759	89.0787	126.952	310.949	130.015	134.906	280.646
Pax5	3336.13	0.646364	0.161942	3.99134	6.57022e-05	0.0134309	ENSMUSG00000014030	28.7121	26.2063	30.8351	14.7765	16.2961	22.499	16.1708	19.7584	21.0109	5452	3844	3308	2318	1864	4697	2877	2382	3941	4305.66	4150.14	4727.65	2271.93	2443.42	3391.09	2333.09	3127.13	3275.04
Osbpl8	3151.06	0.463208	0.11616	3.98768	6.67232e-05	0.0134447	ENSMUSG00000020189	25.2312	27.4138	23.7302	19.6663	16.5546	20.8162	19.7499	16.8514	18.6108	4802	4074	2553	3122	1821	4163	3589	1975	3199	3722.26	4271.55	3580.27	2975.06	2442.54	3086.65	2803.07	2623.69	2854.42
Dapk2	19.1126	2.8876	0.725137	3.98215	6.82953e-05	0.0135677	ENSMUSG00000032380	0.691052	2.43404	0.686434	0.055649	0.11796	0.125524	0.16998	0.452766	0.151938	30	85	17	2	3	6	7	12	6	23.4721	87.3206	23.8406	1.93818	4.00708	4.28533	5.55442	16.2301	5.36501
Dnajb11	8113.58	-0.428957	0.108021	-3.97104	7.15603e-05	0.0139862	ENSMUSG00000004460	185.621	146.396	185.877	242.776	251.68	215.164	250.251	232.367	216.427	8856	5603	5035	9568	7007	11262	11423	6799	9346	6921.86	5765.94	7087.54	9283.23	9386.35	8064.54	8977.82	9144.82	8390.1
Gm20559	116.046	2.29357	0.577973	3.96831	7.2385e-05	0.0139862	ENSMUSG00000106734	4.78015	37.5885	6.20219	2.27887	1.8128	6.43098	2.47321	3.55055	3.75064	79	576	77	21	20	141	57	46	64	69.7748	580.386	92.7117	34.1611	26.5044	94.308	34.7837	54.7792	57.0009
Elk3	1441.48	0.544819	0.137592	3.95968	7.50489e-05	0.0142097	ENSMUSG00000008398	30.954	27.2441	34.6878	24.4641	21.1717	17.6217	22.4471	20.4414	22.4537	2055	1540	1351	1371	961	1509	1591	1039	1577	1779.4	1654.22	2038.78	1441.87	1216.89	1018.38	1241.96	1239.89	1341.96
Runx1	373.862	1.01764	0.257104	3.95807	7.55567e-05	0.0142097	ENSMUSG00000022952	6.00035	7.07374	4.29676	3.32177	2.16248	4.38767	2.23592	2.63155	2.60976	767	618	353	325	126	515	283	198	325	568.953	708.43	416.598	322.974	205.071	418.167	203.966	263.341	257.255
Ric1	1364.17	0.762762	0.193161	3.94884	7.85294e-05	0.0143852	ENSMUSG00000038658	11.9324	17.5618	14.5228	8.75292	8.91189	12.2483	8.29917	7.64153	6.8741	1868	1802	1175	1143	885	2114	1334	868	1082	1483.92	2306.74	1846.74	1116.18	1108.42	1530.99	992.924	1002.92	888.707
Ifi27l2a	194.345	1.16146	0.293972	3.95092	7.78524e-05	0.0143852	ENSMUSG00000079017	37.2389	66.1516	53.7851	18.1353	25.7826	19.3675	17.2345	34.6266	27.4	275	374	237	104	107	157	127	149	178	211.777	397.346	312.766	105.756	146.643	110.706	94.2936	207.825	161.993
Apip	760.03	-0.480523	0.122082	-3.93606	8.28314e-05	0.0148771	ENSMUSG00000010911	39.3938	38.7007	36.9588	50.3187	61.3777	51.0641	56.7592	56.6894	49.3682	787	579	420	811	693	1094	1072	676	875	601.314	623.934	576.856	787.591	936.995	783.437	833.509	913.233	783.397
Cpd	179.503	1.40544	0.357801	3.92798	8.56635e-05	0.0148771	ENSMUSG00000020841	1.18586	2.92433	1.65145	0.740782	0.555107	1.31449	0.755028	0.599	0.475748	255	508	200	67	70	283	154	80	93	183.289	477.392	261.001	117.406	85.8086	204.208	112.27	97.7091	76.4435
Racgap1	250.991	0.941706	0.239403	3.93356	8.36975e-05	0.0148771	ENSMUSG00000023015	6.47091	6.11453	7.09125	3.27926	4.54373	2.50625	2.50292	3.63219	4.23938	483	327	272	191	204	213	157	141	266	354.319	353.623	397.034	184.121	248.826	137.933	131.849	209.896	241.32
Ly75	731.749	0.550837	0.140422	3.92273	8.7551e-05	0.0148771	ENSMUSG00000026980	7.35278	5.33349	6.17664	4.04895	4.54393	4.28822	4.01176	4.76535	4.33758	1357	795	640	614	487	866	705	547	723	1059.45	811.682	910.029	598.23	654.805	621.055	556.112	724.65	649.735
Basp1	1750.93	0.615434	0.157004	3.91987	8.85979e-05	0.0148771	ENSMUSG00000045763	57.7837	63.8328	63.905	39.1701	42.112	36.9976	33.9298	50.5983	41.744	2656	2333	1668	1483	1128	1866	1490	1423	1736	2072.05	2417.61	2343.18	1440.28	1510.27	1333.47	1170.51	1914.86	1556.15
Sfn	857.778	-0.471824	0.120255	-3.92353	8.72609e-05	0.0148771	ENSMUSG00000047281	24.4093	19.6478	21.0953	27.4329	29.3344	31.9507	31.8712	32.2546	29.8824	958	617	471	885	670	1376	1197	772	1060	747.52	635.526	660.603	861.464	898.467	983.533	939.057	1042.47	951.358
Rbm47	302.251	1.00376	0.255733	3.92504	8.67166e-05	0.0148771	ENSMUSG00000070780	4.24704	5.80827	6.61989	3.5072	1.81279	3.31607	3.71527	2.18201	2.34096	497	392	319	230	132	330	356	167	264	337.769	487.897	538.345	286.018	144.189	265.077	284.266	183.146	193.548
Cmss1	2357.18	-0.42439	0.108405	-3.91486	9.04572e-05	0.0150106	ENSMUSG00000022748	145.287	140.845	125.709	198.117	204.033	184.506	194.914	176.221	162.518	2524	1878	1289	2770	2029	3559	3359	1864	2651	1978.69	2026.01	1750.63	2766.77	2779.11	2525.67	2553.85	2532.88	2301
Trip13	481.489	-0.515434	0.131971	-3.90567	9.39641e-05	0.0152784	ENSMUSG00000021569	9.06458	8.37667	9.24713	11.3507	14.5733	12.6975	13.5729	13.1312	11.9347	506	360	272	512	438	736	669	399	554	371.736	362.832	387.766	477.317	597.721	523.384	535.502	568.325	508.816
Polr3h	2509.23	-0.576906	0.147736	-3.90497	9.42373e-05	0.0152784	ENSMUSG00000022476	68.9172	46.1305	56.4669	74.9526	84.9761	103.737	90.7779	87.3378	74.8009	2942	1859	1368	2884	2245	3245	3586	2054	2746	2227.49	1574.55	1865.96	2484.18	2746.12	3370.06	2822.12	2979.09	2513.47
Creld2	2351	-0.427644	0.109713	-3.89785	9.70498e-05	0.0154029	ENSMUSG00000023272	80.4228	63.5536	77.7307	96.4402	108.652	96.653	97.6667	103.108	99.5493	2605	1643	1436	2560	2044	3435	3034	2027	2910	2030.63	1694.88	2006.87	2496.93	2743.72	2452.91	2372.45	2747.56	2613.07
Rnf220	6230.93	-0.341198	0.0875428	-3.8975	9.71893e-05	0.0154029	ENSMUSG00000028677	171.683	154.879	160.868	209.616	226.318	207.472	226.163	190.77	190.146	6971	5063	3698	7148	5141	9053	8729	4953	7091	5451.18	5194	5222.86	6824.73	7186.78	6621.22	6908.52	6392.63	6276.42
Brca1	113.682	1.56247	0.401911	3.88762	0.000101234	0.0156912	ENSMUSG00000017146	1.82738	2.27451	1.0133	0.528928	0.597888	1.03431	0.24191	0.570614	0.528095	136	281	101	59	62	182	37	57	82	211.746	278.371	120.06	62.8467	69.2884	120.462	26.9676	69.7809	63.6153
Zfpl1	935.75	-0.5439	0.139878	-3.88839	0.000100913	0.0156912	ENSMUSG00000024792	39.1495	35.7272	35.2146	50.148	67.1628	50.5705	51.0525	56.8537	49.3261	1007	670	511	960	928	1355	1221	849	1067	744.788	718.312	684.321	977.714	1278.3	967.112	934.46	1141.59	975.154
Notch4	26.2205	2.73077	0.70441	3.87668	0.000105892	0.0160603	ENSMUSG00000015468	0.267003	0.278716	1.75316	0.0746	0.076917	0.092447	0.267023	0.090825	0.062017	9	26	19	11	8	18	19	10	10	20.8802	23.0214	140.191	5.98221	6.01587	7.26658	20.0896	7.49611	5.04191
Top2a	425.855	0.844029	0.217663	3.87768	0.000105457	0.0160603	ENSMUSG00000020914	10.5135	10.4466	8.59764	3.5782	4.83008	6.86651	5.61988	6.99008	5.48164	779	702	363	232	250	556	449	254	373	627.501	658.547	524.287	218.992	288.319	411.923	322.695	440.306	340.124
Klrk1	12.0764	3.2112	0.829203	3.87263	0.000107666	0.0161556	ENSMUSG00000030149	1.74366	0.851751	0.918987	0.285227	0	0.161199	0.136694	0	0.162465	73	24	18	6	0	6	3	0	5	43.6881	22.5404	23.5444	7.32809	0	4.05955	3.29497	0	4.23179
Gfi1	848.439	-0.540005	0.139787	-3.86306	0.000111978	0.0163	ENSMUSG00000029275	14.4687	11.556	11.0599	19.4693	19.8001	19.7781	17.2725	17.3991	15.4691	955	615	424	1041	757	1397	1114	684	916	743.039	626.81	580.775	1025.25	1016.96	1020.89	853.367	943.007	825.86
Tnfaip8l1	10.1396	3.80229	0.983548	3.86589	0.000110683	0.0163	ENSMUSG00000044469	0.276279	0.960481	0.32094	0.040011	0	0.098985	0.052008	0.026886	0	18	57	11	2	0	7	3	1	0	13.7183	50.3721	16.295	2.0372	0	4.94016	2.48443	1.40894	0
A430005L14Rik	2808.08	-0.521633	0.13504	-3.8628	0.000112095	0.0163	ENSMUSG00000047613	129.845	91.3557	116.742	166.612	178.615	135.17	178.466	163.721	157.007	3172	1740	1639	3308	2498	3578	4125	2400	3453	2451.18	1821.53	2253.48	3225.2	3372.27	2564.75	3241.21	3261.84	3081.28
Chd9	745.049	0.630847	0.16386	3.84991	0.000118162	0.0170069	ENSMUSG00000056608	15.8334	15.7471	18.5118	9.51211	11.0696	10.6761	9.94382	9.9786	14.1019	1235	740	762	613	490	786	754	442	984	902.305	947.219	1077.97	555.684	630.288	611.24	544.871	600.736	835.13
Ighv6-3	128.17	0.870224	0.22648	3.84238	0.000121845	0.0173598	ENSMUSG00000076677	59.7211	41.786	49.9724	28.8301	32.7451	23.8609	29.4939	21.1937	31.6558	274	145	140	101	84	120	138	59	127	212.07	156.644	181.36	104.925	116.235	85.121	100.816	79.387	116.977
Ighv4-1	153.419	1.34303	0.349787	3.83957	0.000123252	0.0173846	ENSMUSG00000076655	77.159	62.4969	20.7287	20.7262	27.3368	15.2312	21.4486	22.3192	21.4026	469	289	76	97	93	102	131	80	114	361.443	309.147	99.4271	99.5924	128.082	71.9708	96.5343	110.342	104.233
Fcer2a	1703.17	0.968356	0.252853	3.82972	0.000128288	0.0176139	ENSMUSG00000005540	35.8359	87.4481	45.9233	21.2759	30.3559	32.2527	29.1392	28.5883	34.8446	1999	3855	1456	966	967	1955	1555	978	1748	1550.94	3997.38	2032.3	944.202	1313.93	1403	1213.27	1305.79	1567.74
Abca1	245.528	1.49128	0.389312	3.83054	0.000127862	0.0176139	ENSMUSG00000015243	1.03824	3.18924	1.46919	0.490534	0.543129	1.13854	0.81564	0.339774	0.822843	290	720	231	114	89	349	216	59	209	227.193	737.107	328.738	110.069	118.865	250.414	171.71	78.4682	187.187
Skil	6670.49	0.570707	0.149096	3.82779	0.000129298	0.0176139	ENSMUSG00000027660	51.8663	77.4568	56.3065	41.4574	39.5428	46.9468	46.1563	38.1125	41.96	8983	10281	5521	5890	3996	8825	7508	4031	6467	6938.81	10944.8	7702.55	5687.23	5290.78	6312.78	5940.62	5381.13	5835.76
Gm38394	338.393	1.19454	0.312159	3.8267	0.000129872	0.0176139	ENSMUSG00000094410	2.43247	2.83974	2.03871	0.964718	0.824674	2.06263	1.04901	0.967772	0.609943	672	634	317	222	134	626	275	166	153	526.457	649.071	451.114	214.347	178.966	449.163	218.607	220.781	137.032
Polr3k	3875.78	-0.546326	0.14303	-3.81966	0.000133634	0.0177821	ENSMUSG00000038628	69.2769	56.5808	53.1873	82.9507	107.89	72.0096	98.0551	86.528	81.8259	4620	2639	2295	4850	3422	4409	6283	2914	4327	3358.69	2897.33	2636.73	4123.82	5231.4	3509.03	4573.54	4427.36	4124.15
Fam221b	3073.85	-0.349177	0.0913782	-3.82123	0.000132789	0.0177821	ENSMUSG00000043633	32.3881	30.853	30.9557	37.5754	44.7053	39.2088	41.6131	39.7221	40.0955	3339	2563	1802	3212	2698	4436	4078	2532	3752	2612.95	2628.38	2554.03	3108.28	3607.44	3179.54	3229.87	3381.74	3362.4
Prdm1	141.795	1.31423	0.345739	3.80123	0.000143978	0.0189795	ENSMUSG00000038151	1.70155	3.74497	1.82248	0.863967	0.778585	1.52948	0.694349	0.899741	1.1763	223	325	88	86	59	190	93	70	149	160.102	372.176	175.343	83.358	73.2673	144.648	62.8536	89.3462	115.062
Msl2	2040.13	0.434964	0.114842	3.7875	0.000152168	0.0198735	ENSMUSG00000066415	27.3572	21.4025	24.0949	16.4171	17.9664	18.7768	19.1137	16.5571	20.034	3503	2179	1734	1716	1327	2629	2320	1287	2303	2715.69	2243.99	2445.75	1671.11	1783.71	1873.47	1825.38	1734.61	2067.48
Grwd1	5955.52	-0.433426	0.114857	-3.7736	0.000160906	0.0206326	ENSMUSG00000053801	143.224	128.972	122.946	178.543	214.84	160.91	179.007	172.42	174.007	6530	4691	3234	6780	5704	8019	7894	4856	7138	5118.14	4867.85	4492.45	6542.37	7678.27	5779.52	6154.12	6502.62	6464.32
Igkv1-110	355.892	0.854003	0.226253	3.77455	0.000160296	0.0206326	ENSMUSG00000093861	127.842	124.438	82.6644	72.7048	56.7361	43.8878	68.0298	55.7353	77.9685	733	542	286	320	182	276	394	189	392	565.19	581.06	373.282	329.46	250.984	194.886	289.738	259.533	358.891
Ormdl2	1670.93	-0.433191	0.115353	-3.75537	0.000173088	0.0219947	ENSMUSG00000025353	93.0066	69.6026	76.7224	112.813	111.461	116.558	106.389	100.113	105.465	1928	1253	986	1895	1305	2698	2142	1338	1999	1542.25	1219.31	1300.45	1918.15	1848.56	1942.61	1697.44	1751.56	1818.04
Dennd1c	259.496	0.954153	0.256871	3.71453	0.000203583	0.0220863	ENSMUSG00000002668	6.31078	12.7978	8.37705	5.60164	5.12532	5.92947	4.1857	3.67598	4.38222	332	449	210	179	162	315	272	135	254	255.499	547.256	346.796	232.552	207.53	241.289	163.033	157.068	184.443
Nosip	1681.63	-0.439943	0.117568	-3.74202	0.000182544	0.0220863	ENSMUSG00000003421	53.1042	46.5444	45.9336	61.7731	75.3236	58.0865	73.3488	66.0379	65.4658	1906	1303	1011	1778	1440	2238	2441	1338	2042	1449.15	1341.52	1281.71	1728.55	2055.74	1593.21	1925.65	1901.88	1857.23
Jkamp	1584.92	-0.394996	0.106361	-3.71374	0.000204221	0.0220863	ENSMUSG00000005078	45.2917	37.0445	44.168	58.047	60.0981	51.8024	58.9171	54.5169	52.9604	1795	1142	1035	1842	1267	2277	2194	1259	1858	1372.97	1186.08	1369.07	1804.35	1822.04	1578.37	1718.24	1744.14	1669
Mrps18c	2611.16	-0.374775	0.100746	-3.71998	0.000199238	0.0220863	ENSMUSG00000016833	257.426	205.41	251.803	312.01	311.248	329.745	312.906	308.892	296.63	2980	1853	1672	2932	2023	4197	3516	2136	3023	2300.46	1938.73	2301.01	2859.27	2781.82	2961.43	2689.78	2912.29	2755.67
Cdc37	7734.16	-0.359836	0.0964211	-3.73193	0.000190021	0.0220863	ENSMUSG00000019471	190.618	151.873	159.535	212.625	233.818	206.673	228.16	209.669	211.273	9036	6251	4610	8097	6452	11619	9932	6305	9297	7233.98	6087.55	6190.79	8274.21	8874.53	7883.39	8330.18	8397.57	8335.26
Dus1l	2615.84	-0.329413	0.0881959	-3.73501	0.000187705	0.0220863	ENSMUSG00000025155	69.1662	61.6763	67.2028	84.6734	88.5586	82.5808	86.8048	83.6656	77.1104	3054	2081	1550	2971	2260	3673	3640	2127	2883	2282.53	2149.75	2267.7	2865.28	2922.85	2739.15	2755.92	2913.9	2645.44
Cd28	11.3312	4.64762	1.25045	3.71674	0.000201806	0.0220863	ENSMUSG00000026012	0.101029	0.790646	0.1847	0	0	0.055402	0	0.028067	0	10	61	12	0	0	7	0	2	0	8.51293	70.366	15.9138	0	0	4.6922	0	2.49592	0
Gls	6436.23	0.519959	0.139914	3.71626	0.00020219	0.0220863	ENSMUSG00000026103	103.955	97.6265	134.343	87.792	75.804	85.2562	90.2533	65.6116	69.8477	9667	6574	6181	6682	3700	8976	7776	3839	6015	7302.08	7242.98	9649.25	6323.48	5325.34	6019.34	6099.1	4863.95	5100.54
Ptbp3	4604.68	0.533007	0.14256	3.73881	0.00018489	0.0220863	ENSMUSG00000028382	46.9766	46.4927	43.3114	31.9677	25.279	39.9636	31.9538	29.3599	32.7044	7204	5494	4220	4499	2069	6478	5036	2970	5052	5823.01	6086.93	5489.9	4063.38	3134.04	4979.04	3810.56	3840.84	4214.38
Zbtb48	484.688	-0.572427	0.153808	-3.7217	0.000197889	0.0220863	ENSMUSG00000028952	10.8263	8.22203	10.9844	12.5906	17.587	15.4094	16.353	13.7645	14.5045	518	350	272	489	431	845	648	379	564	386.885	310.334	401.379	461.368	628.562	553.484	562.213	519.122	538.848
Tmub1	723.932	-0.583805	0.157249	-3.71262	0.000205127	0.0220863	ENSMUSG00000028958	21.8597	19.7981	24.9638	29.2535	38.337	40.1949	29.2581	32.0179	32.5487	664	491	449	753	684	1366	862	579	858	522.06	499.4	609.626	716.396	915.69	964.858	672.239	807.006	808.113
Itpr1	983.932	0.561637	0.151078	3.71753	0.000201176	0.0220863	ENSMUSG00000030102	9.57251	7.94097	8.42698	4.33752	6.47977	6.44117	6.15791	5.69039	6.44914	1413	1157	829	770	723	1132	1212	659	1022	1353.84	1186.22	1218.68	629.046	916.543	915.63	837.871	849.355	948.21
Dcbld2	105.937	2.31804	0.623994	3.71485	0.000203325	0.0220863	ENSMUSG00000035107	0.445197	4.07249	0.781437	0.130209	0.14671	0.513786	0.424026	0.341429	0.639368	79	422	46	19	15	97	63	37	94	54.8649	527.672	98.4489	16.2811	17.7729	63.4368	49.999	43.702	81.259
Kdm6a	1397.3	0.629077	0.168714	3.72865	0.000192507	0.0220863	ENSMUSG00000037369	14.6489	20.6402	17.4797	10.5491	10.1793	12.6829	13.833	9.14063	12.956	1917	2065	1280	1163	748	1672	1720	784	1527	1479.78	2202.18	1805.52	1092.71	1028.41	1287.73	1344.34	974.483	1360.58
Trps1	269.229	0.842657	0.226856	3.71451	0.0002036	0.0220863	ENSMUSG00000038679	3.21083	3.66988	2.92444	1.47616	1.73141	2.78377	1.67298	1.54049	1.8689	429	413	283	168	130	365	260	148	288	365.281	440.971	340.196	172.204	196.999	318.316	183.105	184.958	221.034
Psmd7	10851.6	-0.402371	0.107971	-3.72665	0.000194039	0.0220863	ENSMUSG00000039067	309.593	280.499	306.543	421.907	417.547	448.337	411.371	364.943	334.923	11694	8308	6597	12934	9043	18059	14768	8316	11390	9027.76	8639.08	9140.21	12615.5	12177.2	13140.4	11540.5	11231.1	10153
Bach2	4103.39	0.449534	0.119963	3.74727	0.000178768	0.0220863	ENSMUSG00000040270	44.7064	44.8955	46.0903	34.8579	28.4801	38.171	32.0729	34.4019	32.8345	6128	4486	3590	4217	2172	5261	4491	3061	4422	4811.83	5103.1	5072.1	3846.87	3064.9	4129.18	3321.04	3907.98	3673.53
Sox5	27.6062	2.25969	0.607261	3.72111	0.000198351	0.0220863	ENSMUSG00000041540	1.47551	0.877369	0.646353	0.328823	0.364677	0.252691	0.087219	0.055793	0.235595	66	57	33	16	9	20	11	5	10	83.1913	52.2474	37.2633	19.0106	20.5636	14.3198	4.73095	3.31986	13.809
Pgap1	167.45	0.876191	0.235495	3.72063	0.000198728	0.0220863	ENSMUSG00000073678	0.968896	1.55862	1.55281	0.633511	0.659489	0.814798	0.865602	0.655178	0.854612	225	217	228	125	57	227	156	112	194	166.997	283.739	273.669	111.965	113.682	141.155	143.532	119.178	153.131
Kctd12	150.952	1.95353	0.524109	3.72734	0.000193513	0.0220863	ENSMUSG00000098557	1.31962	6.24796	0.971169	0.651391	0.398737	0.980421	1.42989	0.594895	0.5076	116	377	89	88	38	111	169	60	75	132.848	664.338	99.9711	67.2425	40.146	99.2043	138.486	63.2048	53.1235
Il6	162.86	0.917284	0.247395	3.70777	0.000209092	0.0223427	ENSMUSG00000025746	10.504	8.17881	11.9556	4.9188	5.20255	5.04551	4.36011	5.27955	7.80094	289	200	221	104	95	169	130	77	210	238.471	196.118	277.542	114.508	118.127	115.133	95.2308	126.498	184.115
L1cam	21.8133	3.77863	1.02236	3.69601	0.000219019	0.0232275	ENSMUSG00000031391	0.248614	1.93058	0.143009	0.05298	0	0.161767	0.032604	0	0.072637	34	60	11	6	0	21	1	0	9	17.6985	145.16	10.41	3.86739	0	11.5749	2.233	0	5.37567
Nsfl1c	6518.68	-0.348049	0.0942678	-3.69213	0.000222385	0.0233993	ENSMUSG00000027455	226.403	197.383	217.955	280.201	282.112	306.313	275.529	253.343	254.365	7315	5111	3980	7413	5281	10733	8528	4983	7477	5695.91	5244.58	5606.51	7228.98	7098.01	7745.91	6669.17	6726.38	6652.65
Cenpt	684.771	-0.489493	0.132691	-3.68896	0.000225169	0.0233993	ENSMUSG00000036672	15.3267	14.2751	13.2123	19.9709	22.3843	17.2166	22.9534	20.3049	19.1401	729	547	400	756	602	907	915	593	807	563.946	554.772	497.101	753.503	823.732	636.726	812.526	788.489	732.142
Hk1	596.779	0.869733	0.235918	3.6866	0.000227275	0.0233993	ENSMUSG00000037012	7.43948	14.3339	7.55544	4.31357	6.35399	4.72226	5.77532	5.41777	6.14691	812	1166	442	396	416	570	584	379	601	629.318	1280.68	653.528	374.165	537.561	401.507	470.008	483.677	540.564
Fmnl1	248.294	0.980839	0.265929	3.68835	0.000225715	0.0233993	ENSMUSG00000055805	4.96095	6.48904	6.78046	2.25181	2.70044	4.69125	2.26238	3.35261	3.45305	302	338	213	187	143	230	216	191	308	293.454	405.418	410.12	136.586	159.758	278.919	128.748	209.297	212.344
Chp1	1067.05	0.579058	0.157395	3.679	0.000234147	0.0239322	ENSMUSG00000014077	20.7752	30.0218	25.766	17.3049	17.0498	19.869	15.943	15.5186	18.2388	1377	1625	976	941	669	1451	1016	640	1092	1082.69	1652.51	1373.05	924.756	888.652	1040.76	799.341	853.529	988.142
Tuba1a	111.81	1.05861	0.288313	3.67174	0.000240905	0.0244458	ENSMUSG00000072235	3.64596	6.76626	3.89283	1.87337	2.85355	1.94602	2.55679	2.63953	2.12333	162	241	98	69	74	95	109	72	86	126.478	248.027	137.726	67.0895	99.1783	67.94	85.6676	97.0204	77.1637
Fos	101.015	2.27062	0.620164	3.66132	0.000250923	0.0252805	ENSMUSG00000021250	1.09461	13.8273	1.83044	0.869268	1.5468	0.549132	1.42427	1.52827	1.26789	58	494	55	38	41	21	64	47	50	40.0265	534.039	68.4417	32.5943	56.5689	20.1828	50.1052	58.9787	48.1984
Igkv14-126	69.1039	1.58137	0.432633	3.65523	0.000256951	0.0257042	ENSMUSG00000094345	27.1827	48.4613	24.7314	6.21161	12.7283	5.70405	10.1645	16.0154	17.5326	126	170	70	22	33	29	48	45	71	97.4982	183.589	90.7046	22.8458	45.6593	20.5638	35.0746	60.6247	65.3751
Slc25a12	451.906	0.650392	0.178303	3.64768	0.000264622	0.0262852	ENSMUSG00000027010	11.2303	9.89662	9.29317	6.04955	4.9888	8.30063	6.47117	7.03545	6.27365	803	531	401	341	235	703	419	349	415	644.239	599.636	545.122	355.857	286.222	478.905	357.088	425.943	374.142
Il10	75.4877	1.44181	0.396603	3.6354	0.000277545	0.0271074	ENSMUSG00000016529	5.12373	3.86276	6.93159	3.08922	1.34083	1.44826	2.60194	2.40774	0.934685	158	95	122	78	24	49	77	45	26	123.127	98.042	170.324	76.1227	32.2251	34.9808	60.1539	61.0635	23.3504
Hbb-bs	51.7802	2.95351	0.813059	3.63259	0.000280587	0.0271074	ENSMUSG00000052305	8.64689	9.89097	26.0456	0.634525	0.589332	0.817954	1.97952	0.144056	7.06092	103	92	181	2	4	11	23	1	73	70.4561	85.3096	216.554	5.10299	4.80344	6.89335	15.4428	1.23902	60.2202
Ankrd44	131.614	0.880277	0.242272	3.63343	0.000279677	0.0271074	ENSMUSG00000052331	2.80894	2.67264	3.37228	1.16422	1.85323	1.42925	1.56253	2.08666	1.64864	217	194	144	87	70	118	126	113	114	175.261	176.178	215.15	74.4864	115.678	89.6323	93.7933	137.405	106.938
Mapk3	2428.89	-0.394054	0.108409	-3.63489	0.000278098	0.0271074	ENSMUSG00000063065	79.8377	63.6679	69.1838	89.7345	107.077	96.4076	97.5057	89.3346	85.4542	2887	1773	1430	2592	2255	3413	3304	2014	2765	2207.06	1858.98	1955.63	2543.69	2960.45	2678.75	2593.21	2606.35	2455.85
Ap3b1	852.039	0.536309	0.147788	3.62891	0.000284624	0.0273103	ENSMUSG00000021686	14.3012	12.2783	14.9377	7.8084	8.7113	9.78906	10.9729	9.33772	11.2191	1341	960	780	687	541	1025	991	591	869	1083.91	982.897	1157.66	606.851	660.324	745.722	800.1	746.91	883.98
Gbf1	818.381	0.487003	0.134511	3.62055	0.000293972	0.0280168	ENSMUSG00000025224	10.2306	8.26443	9.49945	6.89668	5.67808	6.20287	7.51529	6.91913	7.11656	1399	861	747	713	467	908	959	607	893	1082.82	923.885	1028.09	748.506	601.05	659.883	765.263	772.884	783.048
Inpp4b	100.87	1.76283	0.487383	3.61693	0.000298117	0.0282211	ENSMUSG00000037940	0.938826	3.26581	2.02239	0.288474	0.566201	1.30586	0.727172	0.295872	0.578311	139	278	138	23	23	134	63	37	74	83.2012	305.691	183.267	26.215	50.1843	116.32	61.9987	27.6729	53.2804
Adgre1	192.023	1.10399	0.305616	3.61234	0.000303444	0.0285338	ENSMUSG00000004730	4.75643	3.8283	6.21179	2.31559	1.54327	1.95538	1.85658	2.18967	3.93678	331	173	257	127	76	181	149	114	301	281.274	239.112	375.613	140.413	91.273	116.223	105.624	136.657	242.02
Pin1	4989.22	-0.479032	0.133532	-3.5874	0.000333998	0.031199	ENSMUSG00000032171	54.1496	43.5997	48.4511	63.4844	84.7961	58.1376	73.4875	69.0975	63.1157	5477	3554	2767	5324	5020	6453	7066	4321	5795	4285.91	3644.84	3921.27	5152.44	6712.38	4625.09	5595.8	5771.87	5193.35
Gm43300	36.5882	1.83484	0.512618	3.57935	0.000344448	0.0319634	ENSMUSG00000105572	1.54348	2.11857	1.4466	0.260597	0.535993	0.569774	0.614072	0.828615	0.129487	79	87	42	11	16	32	30	26	6	61.7107	89.464	59.1402	10.6838	21.4324	22.8968	23.6199	34.9637	5.38202
Rce1	2181.25	-0.416015	0.116501	-3.57091	0.000355748	0.0327963	ENSMUSG00000024889	82.81	76.0387	72.8339	96.3948	125.648	101.773	112.128	95.1013	95.7109	2333	1745	1198	2267	2066	3307	3086	1727	2498	1863.99	1807.77	1676.37	2224.91	2828.59	2302.55	2428.16	2259.19	2239.67
Pik3r5	128.521	0.91806	0.257847	3.56048	0.000370177	0.0335552	ENSMUSG00000020901	2.01867	2.42299	2.24203	1.38989	0.885037	1.06017	1.15002	1.00105	1.66121	195	224	139	88	60	132	119	66	159	165.178	209.404	187.587	116.618	72.4269	87.1917	90.53	86.4469	141.309
Malt1	2503.25	0.576556	0.161962	3.55981	0.000371118	0.0335552	ENSMUSG00000032688	37.6883	42.6067	36.2761	24.1836	21.573	29.2355	35.3069	21.4051	27.1666	3739	3631	2149	2035	1293	3135	3381	1384	2661	3028.76	3616.46	2980.95	1992.87	1733.9	2361.48	2729.72	1815.44	2269.63
Fam160b1	633.455	0.923532	0.25933	3.56123	0.000369126	0.0335552	ENSMUSG00000033478	5.1872	12.3581	6.15503	3.90708	3.70472	4.29271	4.10486	5.27005	4.17515	756	1427	502	465	323	681	542	470	558	586.631	1476.15	711.767	453.088	419.025	487.953	446.612	629.003	490.87
Slc27a1	307.616	-0.664626	0.186882	-3.5564	0.000375968	0.0337772	ENSMUSG00000031808	6.31865	5.03782	4.67926	7.04371	10.693	7.56442	8.60653	9.3659	8.33555	367	237	178	290	288	379	419	277	327	254.36	214.197	192.609	290.753	430.504	306.065	333.313	397.905	348.835
Rrm2	274.368	1.31132	0.369507	3.54885	0.000386921	0.0345413	ENSMUSG00000020649	11.772	12.8468	7.2036	3.07106	3.71008	2.23278	3.10631	7.97812	5.70554	631	561	226	122	117	124	164	267	286	491.44	566.45	307.5	131.464	154.901	93.6872	124.757	351.501	247.616
2310033P09Rik	1267.81	-0.427073	0.121064	-3.52767	0.000419228	0.03719	ENSMUSG00000020441	45.0819	42.8735	40.3117	59.2609	63.3751	48.7419	64.8131	55.3302	58.0407	1359	1030	694	1462	1109	1612	1875	1010	1578	1058.9	1063.2	968.411	1427.21	1489.27	1150.64	1464.13	1371.26	1417.29
Gle1	2494.43	-0.488608	0.138721	-3.52225	0.000427908	0.037495	ENSMUSG00000019715	52.6368	41.8842	45.635	68.7932	81.0915	62.2429	73.9885	57.8613	54.4602	2937	1645	1572	2808	2243	3350	3858	2000	2574	2161.87	1816.92	1916.52	2897.24	3330.95	2569.48	2923.51	2508.04	2325.31
Ccdc186	420.759	0.707275	0.200805	3.5222	0.000427983	0.037495	ENSMUSG00000035173	3.7737	5.66742	3.62356	2.71882	2.60804	3.12968	2.85051	2.02651	2.92158	617	650	354	369	255	545	400	218	447	477.538	757.482	468.869	352.792	330.071	398.065	347.027	270.642	384.344
Dtl	245.977	1.07493	0.305619	3.51722	0.000436088	0.0379693	ENSMUSG00000037474	4.54073	4.4345	3.55078	1.4243	2.47975	1.09658	1.59528	2.82019	2.60307	506	405	227	135	163	132	172	198	266	400.245	412.85	320.036	128.736	218.605	97.1527	135.281	262.352	238.532
Dennd4a	6520.27	0.415254	0.118167	3.51414	0.000441182	0.0381771	ENSMUSG00000053641	79.2917	91.3733	76.4109	69.1838	60.8975	65.7801	68.5966	53.6928	57.9102	9551	8718	4942	6594	4173	8335	7503	4340	6172	7330.35	8922.21	7223.23	6558.49	5630.58	6111.93	6101.2	5238.62	5565.77
Ogfod3	482.052	-0.491169	0.140052	-3.50704	0.000453117	0.0389708	ENSMUSG00000025169	16.6476	14.6191	14.963	24.6231	22.6108	18.6703	23.3147	21.3172	21.0439	512	359	263	621	404	631	689	398	584	398.989	370.502	367.159	606.067	542.462	450.462	538.242	540.095	524.488
Eif6	9820.66	-0.350351	0.100101	-3.49997	0.000465305	0.0395369	ENSMUSG00000027613	313.146	273.387	311.617	375.241	436.81	349.379	417.771	372.141	365.304	11101	7728	5578	10902	9044	13441	13392	7953	11695	8469.91	7810.1	8618.43	10407.4	11816.1	9498.22	10871	10622.9	10271.8
Zbtb49	323.543	-0.691177	0.19747	-3.50016	0.000464971	0.0395369	ENSMUSG00000029127	6.42491	6.28055	4.24294	11.3752	10.5713	8.45369	9.10745	7.95112	8.24672	357	286	138	406	291	437	446	240	361	253.308	261.533	171.051	459.874	416.835	334.999	345.445	330.839	338.006
Kmt2c	1390.26	0.456926	0.130695	3.49613	0.000472064	0.039871	ENSMUSG00000038056	9.72186	10.3304	10.2601	6.93254	8.48163	7.31643	9.07085	6.08157	6.98119	2031	1808	1301	1189	920	1824	1589	799	1393	1590.66	1785.07	1716.87	1162.77	1388.66	1202.98	1428.19	1050.09	1187.06
Slfn1	11.4775	2.69351	0.771426	3.4916	0.000480128	0.0403107	ENSMUSG00000078763	0.432766	0.890855	0.800255	0.15761	0.11139	0.05916	0.113249	0	0.215238	20	33	21	6	3	3	5	0	9	15.6462	34.0181	29.5842	5.84302	4.02767	2.14981	3.93903	0	8.08978
Sppl2a	1022.24	0.586521	0.168186	3.48734	0.000487854	0.0405318	ENSMUSG00000027366	11.6131	12.7714	14.4473	9.02842	6.98963	10.2501	7.42527	8.57899	9.88286	1523	1356	994	908	466	1386	889	728	1206	1150.1	1335.91	1463.03	916.852	692.304	1020.31	707.461	896.668	1017.5
Atp6v1a	1246.61	0.701953	0.201307	3.48698	0.000488509	0.0405318	ENSMUSG00000052459	18.5248	26.5103	15.0158	11.592	9.37707	12.9709	14.3435	12.3269	14.3904	1808	2303	929	1002	556	1561	1403	790	1298	1506.62	2277.34	1248.74	966.735	762.728	1060.31	1122.29	1058.06	1216.7
Map3k2	756.732	0.489459	0.140586	3.48157	0.000498489	0.040879	ENSMUSG00000024383	4.45614	4.00595	5.13122	2.94813	2.89732	3.80379	3.27689	3.32121	3.28415	1138	757	781	579	443	1154	822	537	789	899.232	853.818	1058.79	610.04	584.74	771.514	636.173	707.319	688.967
Pcm1	1342.27	0.514676	0.147815	3.4819	0.000497861	0.040879	ENSMUSG00000031592	11.345	11.5108	13.9961	8.86713	9.19905	9.84917	9.85698	6.40494	8.10618	1881	1597	1351	1201	932	1826	1611	688	1270	1511.45	1619.73	1906.66	1211.36	1225.71	1318.88	1263.39	900.56	1122.72
Pclaf	168.185	1.22365	0.351864	3.47761	0.000505908	0.0412476	ENSMUSG00000040204	7.01197	7.81615	3.8664	2.15937	2.88681	1.44573	2.04501	4.03826	3.63759	389	348	121	99	93	85	108	137	154	296.584	349.129	167.197	93.642	122.101	61.4539	83.2036	180.238	160.113
Aff3	646.67	0.63635	0.183545	3.467	0.000526298	0.0419457	ENSMUSG00000037138	6.54782	8.81617	6.68394	5.03118	4.00632	4.82871	4.35505	4.45108	6.01767	1034	872	592	506	359	712	619	399	853	734.884	1045.08	767.062	579.015	449.697	544.712	470.235	527.222	702.121
Arl5c	2319.14	-0.570935	0.164555	-3.46957	0.000521289	0.0419457	ENSMUSG00000038352	116.1	136.626	109.219	155.154	208.133	224.089	190.067	177.537	137.546	2109	2077	1157	2260	2131	4413	3325	1897	2251	1639.8	2038.16	1577.36	2247.08	2940.02	3181.22	2582.65	2646.38	2019.61
Ccrl2	29.5166	2.66118	0.767582	3.46697	0.000526366	0.0419457	ENSMUSG00000043953	1.00157	4.58383	0.724041	0.329069	0.3107	0.276081	0.529615	0	0.597883	32	173	19	14	4	14	17	0	25	30.7944	148.856	22.7629	10.3747	9.55398	8.53179	15.6657	0	19.1103
Zfp36	1086.98	1.07976	0.311285	3.46872	0.000522954	0.0419457	ENSMUSG00000044786	18.2387	53.444	18.0928	10.8067	12.9455	16.9271	13.4867	15.1256	17.4989	1273	2914	707	617	520	1291	885	647	1089	983.831	3044.91	997.951	597.748	698.392	917.75	699.898	861.087	981.296
Fgl2	25.3961	2.23277	0.644544	3.46411	0.000531985	0.0421553	ENSMUSG00000039899	1.16444	0.398613	0.462212	0.133187	0.154363	0.064032	0.168942	0.032477	0.309646	116	32	26	11	9	7	16	2	28	90.7708	32.8193	36.8424	10.6461	12.0345	5.01701	12.6698	2.67182	25.0933
Gnl3l	1808.31	0.396205	0.114621	3.45666	0.000546911	0.0428565	ENSMUSG00000025266	20.4517	23.2387	20.2008	16.5747	16.4075	18.5222	15.8959	15.2611	15.7111	2557	2327	1463	1716	1162	2508	1943	1210	1829	2012.3	2415.03	2032.39	1672.28	1614.58	1831.77	1504.7	1584.73	1607.06
Ighv5-6	79.6509	1.61631	0.467557	3.45693	0.000546364	0.0428565	ENSMUSG00000094951	20.8369	17.5778	83.0214	9.86786	19.8103	11.5702	13.9083	10.9318	13.9584	94	60	229	34	50	57	64	30	55	72.7803	64.8476	296.516	35.343	69.2029	40.4488	46.7366	40.2976	50.6847
Itk	44.4835	1.85574	0.538311	3.44734	0.000566132	0.0439645	ENSMUSG00000020395	0.619175	1.16286	1.08491	0.213452	0.045365	0.201708	0.31681	0.529393	0.292242	70	106	61	20	3	25	34	37	30	53.9938	107.104	96.7384	19.0867	3.95642	17.6794	26.5784	48.7209	26.4933
Rlim	3445.68	0.811536	0.235447	3.44679	0.000567284	0.0439645	ENSMUSG00000056537	24.2113	49.194	26.2549	18.9829	15.5407	26.6477	20.6497	17.5622	16.5272	4318	7078	2577	2845	1674	5173	3339	1987	2908	3406.75	7311.1	3777.54	2738.95	2186.99	3768.76	2795.37	2608.01	2417.61
Sp100	1113.18	0.673499	0.196126	3.43402	0.000594699	0.0458373	ENSMUSG00000026222	34.7903	46.9117	46.3626	21.5858	24.2527	22.1332	33.6149	26.2046	35.0486	1545	1560	1153	761	639	980	1463	683	1367	1174.29	1672.54	1600.13	747.085	818.584	750.976	1091.31	933.686	1230.02
Bcap31	4645.06	-0.29069	0.084884	-3.42456	0.000615805	0.0464488	ENSMUSG00000002015	178.27	170.74	187.378	224.341	232.463	212.965	234.283	202.108	221.65	5047	3850	3032	5192	3816	6615	6373	3459	5656	3930.92	3976.49	4224.84	5072.52	5126.53	4719.96	4970.01	4703.34	5080.97
Psmc1	9846.95	-0.450091	0.131404	-3.42525	0.000614242	0.0464488	ENSMUSG00000021178	299.023	225.963	306.963	412.354	387.286	425.057	421.392	317.776	334.989	10944	6687	6248	11402	7894	16837	13837	7150	11040	8339	6655.43	8753.02	11791.3	10801.3	11913.9	11304.9	9352.33	9711.47
Pycr1	1490.16	-0.540776	0.157827	-3.42639	0.000611662	0.0464488	ENSMUSG00000025140	35.548	28.9413	34.4752	49.5681	53.9868	59.9825	48.8771	42.959	35.996	1473	981	869	1799	1390	2792	2101	1171	1366	1203.12	1034.57	1193.1	1720.27	1827.41	2040.49	1591.48	1534.46	1266.52
Cd3e	9.4315	4.04234	1.17998	3.42576	0.000613079	0.0464488	ENSMUSG00000032093	0.400631	1.50158	0.701002	0	0.049073	0	0	0.234513	0.063177	15	43	14	0	1	0	0	5	2	11.0929	43.9133	19.847	0	1.35893	0	0	6.85287	1.81852
Lrba	214.936	0.968445	0.283041	3.42157	0.000622603	0.0467118	ENSMUSG00000028080	2.92409	1.47119	1.83521	0.900269	1.12746	1.69439	0.916454	0.806028	0.963169	418	258	176	129	131	372	186	114	179	440.727	234.025	282.623	139.033	169.824	256.484	132.787	128.116	150.803
Med10	3215.8	-0.36812	0.107788	-3.41523	0.000637281	0.0473706	ENSMUSG00000021598	163.357	153.114	158.174	204.906	231.203	176.573	224.734	197.563	205.384	3441	2818	1919	3595	2869	4162	4625	2428	3777	2711.18	2684	2684.3	3487.17	3837.66	2945.49	3588.31	3460.44	3543.64
Phgdh	5972.51	-0.341143	0.0998989	-3.41488	0.000638101	0.0473706	ENSMUSG00000053398	149.278	119.433	136.92	172.427	165.948	175.225	171.797	182.136	169.653	7003	4488	3639	6667	4536	8982	7691	5237	7211	5465.36	4618.76	5126.19	6472.67	6076.53	6448.2	6051.27	7036.78	6456.83
Mtif3	1006.84	-0.571047	0.167536	-3.40849	0.000653229	0.0481162	ENSMUSG00000016510	31.3181	23.0308	25.5887	43.4693	46.7985	29.9939	47.1632	36.0936	36.9642	1168	665	545	1199	915	1231	1622	763	1191	872.25	677.823	729.267	1242.14	1303.47	839.911	1264.59	1061.5	1070.6
Car13	53.8405	1.55453	0.456174	3.40777	0.000654967	0.0481162	ENSMUSG00000027555	1.37248	3.18252	1.57449	0.4155	0.617187	1.39147	0.575736	0.670225	0.568129	80	149	52	20	21	89	32	24	30	62.5192	153.118	73.3371	19.4079	28.1176	63.7085	25.2308	32.2207	26.904
Klra4	4.94236	5.33276	1.56601	3.40531	0.000660898	0.0483003	ENSMUSG00000079852	0.447771	0.129684	1.26607	0	0	0	0	0	0.07641	13	3	21	0	0	0	0	0	2	10.1683	3.11047	29.3986	0	0	0	0	0	1.80387
Atxn7l1	99.5298	1.06912	0.314806	3.39613	0.000683448	0.0494368	ENSMUSG00000020564	2.48267	4.57095	3.01003	1.32231	1.3195	1.29815	1.82751	2.39092	1.64258	128	203	82	74	57	66	101	74	91	109.239	212.429	135.428	59.6614	58.0662	57.4115	77.3606	111.027	75.1449
Haus8	268.587	-0.661801	0.194869	-3.39613	0.000683458	0.0494368	ENSMUSG00000035439	5.10138	5.47971	5.80934	7.69335	8.91885	6.58764	10.2421	8.81616	10.2923	257	253	175	267	211	390	345	179	357	175.849	199.511	204.769	271.919	307.485	228.05	340.131	320.734	368.838
Tcf4	4150.98	0.523634	0.154296	3.3937	0.000689542	0.0496224	ENSMUSG00000053477	73.0968	80.0483	74.9387	45.9317	48.4588	43.6841	59.4374	60.08	63.3883	6133	5259	3968	3046	2547	4340	4655	2881	5117	4874.46	5638.03	5109.87	3140.79	3231.87	2927.96	3813.19	4228.29	4394.39
Gm38257	39.9721	2.36526	0.697446	3.39131	0.000695581	0.0498029	ENSMUSG00000102258	0.689049	3.25174	0.521965	0.254991	0.360938	0.499777	0.280563	0.365248	0.031018	49	186	21	15	15	39	19	16	2	38.3147	190.976	29.6779	14.5392	20.0725	27.9323	15.0088	21.4343	1.79307
Herc1	1716.44	0.305494	0.0901284	3.38955	0.000700084	0.0498721	ENSMUSG00000038664	10.2607	10.0671	9.57718	7.87658	8.10559	8.56218	8.63444	7.59242	8.22448	2460	1996	1415	1582	1042	2266	1997	1175	2020	1973.05	2044.43	1883.17	1553.21	1558.33	1654.76	1596.82	1540.17	1644.02
Cd38	676.178	0.764123	0.226053	3.38028	0.000724113	0.0513247	ENSMUSG00000029084	18.2756	10.6395	15.3182	6.29107	7.86432	7.38346	8.73974	11.2992	10.7702	1486	671	701	400	364	664	665	505	790	1129.77	694.682	968.281	398.786	486.218	458.767	519.776	737.177	692.153
Zkscan7	53.7325	1.28535	0.380634	3.37688	0.000733125	0.0514464	ENSMUSG00000063488	0.825804	0.778509	1.08174	0.253572	0.576875	0.357945	0.246833	0.27549	0.520317	103	77	76	26	42	48	28	21	58	79.6966	79.2041	106.546	25.0459	55.574	34.6552	22.7611	28.0059	52.1035
mt-Rnr2	77780.4	0.57083	0.169032	3.37704	0.000732695	0.0514464	ENSMUSG00000064339	2786.48	3464.82	3437.74	1877.71	1780.13	2890	2384.01	1885.55	2422.08	106964	106391	75091	59229	39758	121725	87590	44118	84020	83454.3	109603	105279	57666.1	53320.9	86997.4	68691.4	59598.9	75412.6
Rrp9	7224.74	-0.378992	0.112486	-3.36924	0.000753766	0.052633	ENSMUSG00000041506	219.177	213.856	202.231	285.352	328.979	259.185	265.727	276.933	255.674	7930	5973	4015	8449	6848	9843	9034	6072	8231	6070.44	6255.98	5727.3	8104.11	9112.71	7215.24	7080.46	8094.81	7361.64
Fgd6	322.43	1.202	0.357023	3.36674	0.000760617	0.0528498	ENSMUSG00000020021	1.63947	5.4369	2.49522	1.4026	0.72827	2.017	1.5687	1.30867	1.45991	357	614	306	183	93	482	324	177	289	256.674	899.037	399.451	225.17	114.031	317.395	236.275	216.229	237.611
Tbc1d4	8.85601	4.06693	1.21032	3.36021	0.000778837	0.0538505	ENSMUSG00000033083	0.069589	0.59507	0.228884	0	0.016985	0.022611	0	0	0.06571	7	51	13	0	1	2	0	0	6	5.33233	48.1605	17.9337	0	1.30167	1.74144	0	0	5.23444
Lcp2	14.4916	3.60523	1.07494	3.35391	0.000796796	0.0546633	ENSMUSG00000002699	0.355566	1.12322	0.222201	0	0.157983	0	0.123898	0.016923	0.023045	34	81	12	0	6	0	5	1	2	22.2086	74.0991	14.1913	0	9.86874	0	7.44506	1.11556	1.49636
Itga4	388.486	0.919342	0.274155	3.35337	0.000798344	0.0546633	ENSMUSG00000027009	2.72492	4.95918	3.57655	1.51463	2.67313	2.75191	1.43817	1.56424	2.18605	492	752	380	286	207	566	262	187	411	398.141	766.193	533.922	226.935	390.475	404.502	202.515	241.649	332.043
Psmc5	11008.1	-0.376747	0.112441	-3.35063	0.000806269	0.0549393	ENSMUSG00000020708	385.283	339.214	382.479	484.494	513.289	568.091	466.145	453.543	421.448	11996	8437	6802	12351	9282	19439	13924	8562	11838	9353.21	8697.64	9494.32	12060.6	12462.2	13861.6	10886.8	11620	10636.2
Crcp	1990.1	-0.341168	0.101913	-3.34765	0.000815013	0.0552681	ENSMUSG00000025532	60.9949	62.1884	60.3289	78.8348	84.3205	79.287	72.781	78.2173	76.9619	2121	1687	1199	2249	1699	3006	2404	1614	2396	1640.83	1766.96	1659.48	2174.64	2268.59	2143.82	1883.6	2220.65	2152.33
Chd1	5764.97	0.323892	0.0969664	3.34025	0.000837035	0.0564898	ENSMUSG00000023852	47.0389	46.1428	44.3482	36.8863	36.0595	41.766	39.5068	35.3331	32.9948	8680	6457	4726	5720	3514	8294	6840	3956	5520	6657.63	6897.84	6418.2	5353.35	5104.27	5941.54	5379.41	5277.77	4854.77
Cd8b1	20.8847	2.46136	0.738622	3.33236	0.000861115	0.0578382	ENSMUSG00000053044	1.85191	1.2991	1.67496	0.376038	0.337836	0.127865	0	0.599512	0.341744	66	37	34	11	7	5	0	13	11	51.3657	38.0576	47.5045	10.6951	9.37156	3.56469	0	17.5492	9.85407
Rad51c	132.761	1.73418	0.520767	3.33005	0.000868294	0.0578656	ENSMUSG00000007646	1.47334	12.3793	2.34602	1.4063	1.4414	1.77735	2.43208	1.88739	1.15696	89	581	60	83	49	96	120	64	64	64.8358	575.383	105.565	63.4584	63.4383	78.6143	102.966	87.6559	52.9292
Kat6b	276.877	0.619497	0.186131	3.32828	0.00087383	0.0578656	ENSMUSG00000021767	2.68342	2.92885	4.05832	2.2433	1.9698	2.07135	2.55627	1.86322	1.95996	347	368	243	240	150	351	361	182	283	294.027	338.956	454.695	252.048	215.86	228.122	269.467	215.462	223.259
Scyl1	1851.76	-0.334634	0.100505	-3.32951	0.000869982	0.0578656	ENSMUSG00000024941	35.3643	32.3499	35.4723	42.3369	46.4117	41.4274	49.9894	43.5977	39.765	2089	1459	1235	1856	1572	2503	2546	1585	2167	1581.26	1527.77	1622.13	1941.16	2075.52	1861.83	2150.38	2057.34	1848.42
Nhp2	11055	-0.324564	0.0977464	-3.32047	0.000898655	0.0592314	ENSMUSG00000001056	536.232	519.157	479.139	657.591	719.555	597.011	642.69	628.458	643.286	12446	9532	6373	12432	9612	15167	14372	8762	13413	9667.37	9885.58	8832.69	12156.6	12974	10818.2	11147	11957.4	12056.5
Exosc10	5657.13	-0.373763	0.112664	-3.3175	0.00090827	0.059583	ENSMUSG00000017264	99.9037	76.4506	89.66	124.36	126.726	105.682	124.097	109.715	106.046	6722	3957	3335	7063	4999	7522	7947	4506	6428	5199.67	4202.64	4771.65	6637.04	6596.47	5528.53	6213.77	6026.52	5737.89
Ptprc	8616.03	0.50225	0.151511	3.31493	0.000916662	0.059583	ENSMUSG00000026395	118.811	103.222	137.911	71.5708	77.3475	77.3151	97.5321	84.8892	104.73	13253	9249	8763	6878	4882	8932	10334	5944	10828	10356.4	9503.23	12292.1	6397.13	6742.96	6773.77	8178.97	7809.26	9490.42
Scamp4	4696.34	-0.449561	0.135589	-3.31563	0.000914381	0.059583	ENSMUSG00000113949	132.096	100.978	113.306	173.24	184.531	131.834	172.495	153.811	140.374	5558	3303	2592	5740	4294	5965	6779	3855	5268	4218.31	3406.29	3699.9	5672.99	5893.34	4232.08	5299.66	5183.62	4660.83
Clcn5	167.528	1.23657	0.373983	3.30649	0.000944736	0.0609233	ENSMUSG00000004317	1.71251	2.13384	1.36229	0.655748	0.247485	1.29159	0.834753	0.730795	0.716015	279	250	138	115	33	259	180	94	148	260.915	343.38	212.232	102.447	37.7109	197.79	122.356	117.508	113.409
Armcx3	632.643	1.15196	0.348539	3.30513	0.000949336	0.0609233	ENSMUSG00000049047	8.71154	33.0504	10.5822	9.86039	8.61095	5.57157	9.42012	7.77341	7.1403	589	1686	405	535	355	504	654	330	494	479.526	1921.06	595.621	556.556	474.046	308.254	498.768	451.579	408.381
Sh3pxd2a	42.1657	1.12187	0.33946	3.30486	0.000950239	0.0609233	ENSMUSG00000053617	0.327353	0.280409	0.305821	0.092889	0.125752	0.153658	0.144515	0.180823	0.150667	61	60	49	22	21	48	39	32	39	69.0848	62.5037	65.9946	20.1014	26.5419	32.5937	29.3413	40.2741	33.0557
Golga7	6741.47	-0.332898	0.100781	-3.30319	0.000955932	0.0610109	ENSMUSG00000015341	171.866	156.301	158.866	217.229	230.325	192.409	224.319	194.659	183.249	7593	5575	3996	7887	5919	9314	9461	5260	7345	5932.93	5698.4	5607.14	7689.4	7952.28	6675.96	7449.76	7091.25	6576.09
Lmo4	3042.66	0.596845	0.180757	3.30191	0.000960287	0.0610128	ENSMUSG00000028266	139.613	118.149	159.258	68.6441	100.635	98.0569	74.7798	104.828	108.554	4880	3341	3157	1990	2095	3777	2556	2291	3481	3852.94	3443.85	4494.11	1942.53	2777.6	2719.93	1985.41	3053.15	3114.4
Pcyt1a	186.533	1.0593	0.321327	3.29665	0.000978456	0.0613383	ENSMUSG00000005615	3.88861	5.58621	1.89577	1.44876	1.45045	1.56574	2.36796	2.23665	2.02693	404	350	114	133	62	185	251	89	184	284.102	430.757	141.332	108.172	105.913	114.896	166.336	173.078	154.209
Ppp4c	12233.7	-0.362459	0.109939	-3.29691	0.000977563	0.0613383	ENSMUSG00000030697	406.166	398.839	416.115	566.087	594.444	466.671	588.889	493.064	471.955	12900	9696	7571	14733	10937	16216	17806	9460	13526	9994.39	10365.7	10469.9	14283.5	14629.1	11542	13940.8	12804.5	12073
Hbb-bt	28.6242	2.99055	0.906895	3.29757	0.00097525	0.0613383	ENSMUSG00000073940	1.49946	4.12219	12.8582	0.260673	0	0.410968	0.724351	0.487445	2.76171	21	45	105	3	0	6	10	4	34	16.2767	47.0257	143.151	2.97651	0	4.26087	7.64589	5.57918	30.7015
Prxl2a	3776.43	-0.321826	0.0976592	-3.2954	0.000982818	0.0613392	ENSMUSG00000021792	116.939	108.542	107.298	155.082	130.564	142.273	144.59	136.615	132.167	4283	3134	2242	4688	2757	5631	5051	3086	4307	3327.1	3261.76	3121.57	4524.47	3715.2	4068.61	3957.74	4102.17	3909.23
Mtss1	489.396	0.603758	0.183288	3.29404	0.000987577	0.0613646	ENSMUSG00000022353	7.40958	10.5137	6.95686	5.12659	6.29533	5.63892	4.89961	5.23111	6.03019	693	669	416	383	341	605	463	327	530	549.872	824.083	527.907	390.117	467.24	420.61	349.809	409.703	465.223
Camsap2	905.599	0.589428	0.179107	3.29093	0.000998577	0.061776	ENSMUSG00000041570	9.83831	10.0758	9.24119	7.93918	5.29333	7.36505	7.40123	4.55538	6.70417	1498	1172	778	967	477	1221	1021	437	901	1151.02	1245.06	1105.52	952.44	619.363	866.072	833.043	562.464	815.399
Rnf213	1348.47	0.861542	0.262423	3.28303	0.00102699	0.0632561	ENSMUSG00000070327	14.1464	30.6249	16.945	9.39221	8.91161	16.5299	11.0785	9.73361	13.5772	1980	2780	1159	807	595	2086	1121	753	1326	1281.05	2928.92	1569.54	872.123	806.746	1504.47	965.208	930.096	1278.06
Nkiras1	450.322	-0.528898	0.161218	-3.28063	0.00103575	0.0635184	ENSMUSG00000021772	13.6351	13.0327	14.5177	15.9073	17.7658	22.9834	23.8685	20.046	19.5823	510	378	261	477	281	875	600	316	570	337.327	340.683	366.723	403.074	439.431	571.22	567.559	523.448	503.437
Pex19	3077.94	-0.49418	0.150953	-3.27373	0.00106137	0.0639771	ENSMUSG00000003464	70.8387	59.9949	70.4454	97.4868	116.578	70.7039	106.437	91.9691	90.4732	3277	2168	1899	3709	2983	3407	4583	2423	3661	2492.25	2229.38	2534.25	3516.94	4101.95	2500.23	3602.57	3414.83	3309.05
Zbtb4	158.935	0.653386	0.199514	3.27489	0.00105702	0.0639771	ENSMUSG00000018750	1.23227	1.28243	1.23529	0.671663	0.710246	0.793546	0.924549	0.744927	0.971371	259	211	147	118	88	184	184	96	182	201.861	221.884	206.915	112.822	116.361	130.657	145.706	128.785	165.422
Fam207a	1168.24	-0.347016	0.105932	-3.27585	0.00105345	0.0639771	ENSMUSG00000032977	23.5708	20.0775	19.4736	26.0587	27.9696	25.847	28.4985	26.4262	27.7806	1405	945	672	1234	995	1728	1459	945	1451	1079.62	971.304	912.051	1223.91	1281.26	1189.93	1255.8	1277.43	1322.82
Igkv1-117	505.158	0.655252	0.200024	3.27587	0.00105336	0.0639771	ENSMUSG00000094335	163.513	118.099	154.859	113.214	85.4855	88.4838	75.6421	77.1609	117.921	951	522	544	506	278	565	443	266	600	733.182	559.368	710.403	520.652	383.239	398.874	325.929	365.652	549.127
Sarnp	9652.65	-0.406634	0.124297	-3.27147	0.00106991	0.0642174	ENSMUSG00000078427	491.656	467.948	514.505	715.133	701.083	577.177	787.847	633.617	545.575	10006	7514	5986	11774	8147	12857	15419	7641	9922	7737.18	7777.94	8278.58	11539.5	11034.6	9129.44	11927.9	10523.1	8925.53
Timm50	5908.12	-0.511961	0.156654	-3.2681	0.00108271	0.0647101	ENSMUSG00000003438	192.29	152.167	168.16	263.119	296.762	182.357	269.731	253.923	211.828	6438	3993	3270	7236	5867	6686	8663	5234	6624	5055.34	4225.33	4520.57	7093.24	7802.88	4818.72	6822.2	7045.33	5789.48
Gprc5a	22.6897	2.43018	0.744431	3.26448	0.00109665	0.0652666	ENSMUSG00000046733	0.363336	2.54978	0.573211	0.185458	0.1967	0.418256	0.080152	0.342999	0.105602	19	107	17	8	6	24	4	11	5	14.8429	110.018	23.9443	7.76883	8.03652	17.1739	3.15011	14.7881	4.48484
Acbd4	107.453	0.797794	0.244635	3.26115	0.0011096	0.06576	ENSMUSG00000056938	9.45802	7.58669	8.7547	5.46518	5.17043	5.00303	3.81539	4.34759	6.12777	156	115	89	113	71	145	98	56	124	160.873	136.296	152.265	95.3204	87.9554	85.5325	62.4341	78.0437	108.354
Cblb	1314.92	0.360824	0.110706	3.2593	0.00111687	0.0658791	ENSMUSG00000022637	14.0912	14.5957	12.9287	11.7329	10.6492	11.7654	10.6949	10.0376	10.7343	2048	1622	1029	1252	816	1742	1432	851	1463	1526.03	1669.52	1431.69	1302.93	1153.42	1280.67	1114.28	1147.24	1208.52
Hgs	1305.45	-0.388109	0.119115	-3.25827	0.00112095	0.0658791	ENSMUSG00000025793	19.8895	19.8011	21.1049	28.9207	29.4722	26.9294	24.2083	26.7693	24.6343	1485	1040	889	1280	1103	2086	1575	1035	1522	1035.21	1088.54	1123.22	1543.52	1534.16	1408.79	1212.19	1470.45	1332.93
Kat6a	940.929	0.536915	0.164965	3.25472	0.00113505	0.0661565	ENSMUSG00000031540	6.40769	4.90739	6.6752	4.38748	3.58299	4.70951	3.50764	4.71891	4.04958	1584	978	928	896	520	1273	823	724	910	1238.96	1002.19	1319.76	869.896	692.871	915.259	652.483	962.945	814.003
Pik3cd	1479.82	0.597773	0.183647	3.25502	0.00113385	0.0661565	ENSMUSG00000039936	19.334	21.4464	23.4813	12.2442	10.6613	13.3378	15.6681	15.0386	18.8407	2176	1922	1510	1145	670	1617	1545	1103	1884	1681.32	1969.84	2087.98	1091.84	927.243	1165.81	1310.83	1380.2	1703.28
Mxd1	270.046	1.3897	0.427922	3.24755	0.00116403	0.0675662	ENSMUSG00000001156	2.48544	9.92918	2.5344	1.2648	2.77753	3.05556	1.51448	1.54831	1.58767	280	882	168	124	165	368	169	112	166	220.046	928.477	229.436	114.823	245.936	271.904	128.996	144.669	146.128
Mbd3	5660.13	-0.406116	0.125134	-3.24544	0.00117267	0.0677892	ENSMUSG00000035478	183.125	158.906	175.943	223.957	267.374	189.679	229.042	239.826	236.752	6149	4316	3351	6310	5205	6961	7336	4949	7206	4813.14	4411.32	4728.56	6035.92	7028.35	5010.9	5791.56	6652.47	6468.98
Tada2b	1297.78	-0.590213	0.181982	-3.24325	0.00118176	0.0680354	ENSMUSG00000029196	13.7949	11.305	14.0523	22.7189	23.479	14.1019	24.6525	17.5538	16.914	1375	908	757	1594	1158	1543	1939	994	1531	1001.24	866.587	1043.52	1691.48	1704.09	1029.11	1722.3	1344.87	1276.8
Clasp2	397.196	0.881789	0.271992	3.24197	0.00118707	0.0680566	ENSMUSG00000033392	4.69934	9.37185	5.35273	3.82118	2.72106	5.16056	2.79207	3.38616	3.51967	532	764	336	363	154	608	317	214	383	401.731	846.196	467.896	334.961	232.643	443.414	229.628	305.5	312.796
	699.241	0.950089	0.293161	3.24084	0.00119177	0.0680566	ENSMUSG00000036452	4.92525	11.4278	5.57221	2.61528	2.72656	5.32717	4.81978	3.61909	4.06318	856	1019	532	400	330	1069	858	396	729	671.816	1646.38	777.188	365.797	371.956	730.355	632.514	520.988	576.169
Bcl6	1121.2	0.57674	0.178051	3.23918	0.00119875	0.0681788	ENSMUSG00000022508	19.7786	18.396	19.724	11.6143	14.7338	9.96287	11.6405	13.6335	16.7695	1835	1375	1035	890	799	1018	1026	779	1413	1435.26	1409.96	1463.55	864.231	1069.31	726.667	812.656	1044.12	1265.08
Tmcc2	6.8638	2.91212	0.899543	3.23733	0.00120654	0.0683461	ENSMUSG00000042066	0.196258	0.289748	0.297343	0.033892	0	0.060397	0.014721	0.045512	0.046382	14	23	12	2	0	7	1	2	3	11.9775	18.6769	18.5555	2.12098	0	3.70484	0.864311	2.93137	2.94274
Znhit3	1299.74	-0.29629	0.0916269	-3.23365	0.00122218	0.0688333	ENSMUSG00000020526	66.2682	64.9355	64.0297	79.8828	83.1527	78.6568	83.1594	80.6235	79.8935	1456	1114	806	1414	1042	1876	1737	1036	1558	1118.94	1158.9	1105.35	1383.36	1404.04	1335.35	1351.05	1437.56	1403.14
Gsdmd	487.326	0.441686	0.136617	3.23302	0.0012249	0.0688333	ENSMUSG00000022575	23.855	19.8624	22.2115	18.4587	15.9447	16.9928	15.0272	15.8651	15.7659	697	473	413	515	326	600	523	357	537	626.168	550.669	596.162	496.833	418.582	448.321	379.479	439.501	430.22
Crip1	114.2	1.0008	0.310594	3.2222	0.00127208	0.0698161	ENSMUSG00000006360	27.371	36.2793	23.0199	8.96017	12.372	14.2894	14.0127	15.729	22.3436	199	204	107	54	56	113	105	66	142	157.637	220.684	135.564	52.9153	71.2619	82.7172	77.6404	95.6032	133.777
Arpp19	16596.6	-0.422261	0.131003	-3.22328	0.0012673	0.0698161	ENSMUSG00000007656	1485.85	1180.67	1378.56	1899.28	2225.48	1698.75	1746.96	1838.89	1540.02	18488	12084	9672	18994	16194	24582	20116	14205	17987	14557.6	12217.8	13810.8	19081.2	21807	16728.6	16466.5	19014.3	15685.7
Hnrnpa0	3796.26	0.455413	0.141326	3.22242	0.00127114	0.0698161	ENSMUSG00000007836	88.2156	72.9196	91.0164	53.5807	65.8623	64.9482	52.6244	62.8759	70.8873	6070	4035	3544	3049	2648	4904	3449	2664	4422	4745.92	4143.5	5006.92	2955.85	3543.77	3512.02	2723.72	3569.98	3964.66
Ahi1	351.813	1.07554	0.333327	3.22669	0.0012523	0.0698161	ENSMUSG00000019986	4.26458	12.8954	3.64185	3.13874	3.32597	3.4988	3.39706	3.57891	3.21291	442	630	215	277	172	366	351	239	298	321.075	1025.45	280.368	242.317	250.439	264.767	246.056	284.373	251.473
Orc1	89.9758	1.3931	0.432342	3.22222	0.00127203	0.0698161	ENSMUSG00000028587	2.16591	4.89077	1.50907	1.1375	1.07035	1.23575	0.484073	1.17355	1.55695	148	278	50	58	49	94	36	51	65	111.877	266.656	79.6439	60.203	55.3677	64.3087	24.037	64.0605	83.6289
Ighv1-55	98.8686	1.08252	0.335885	3.2229	0.001269	0.0698161	ENSMUSG00000095589	25.6747	48.0115	20.301	11.7334	15.5167	16.2686	12.5422	13.6793	20.7549	157	223	75	55	53	109	77	49	111	120.994	238.5	98.1385	56.4573	72.9873	76.9062	56.7506	67.6035	101.48
Cep72	240.301	-0.993591	0.308636	-3.21929	0.00128507	0.0702557	ENSMUSG00000021572	2.28105	1.66302	1.92432	2.91744	4.24069	7.32151	3.3651	2.62327	3.19353	205	153	115	203	161	602	347	176	272	164.865	126.952	142.216	216.219	306.538	531.876	233.988	200.098	239.954
Bank1	961.251	0.794269	0.247396	3.21051	0.001325	0.0717609	ENSMUSG00000037922	14.4438	18.9626	26.6502	7.31241	11.1759	14.1862	9.95505	11.9226	15.4043	1210	1256	1177	530	527	1370	817	604	1135	940.718	1304.44	1774.83	488.357	727.97	928.668	623.767	819.514	1043
Rab4b	1431.71	-0.416636	0.129723	-3.21174	0.00131935	0.0717609	ENSMUSG00000053291	56.8907	51.6456	50.017	61.2399	86.3123	64.7081	76.2801	69.5829	70.8267	1575	1113	790	1398	1379	1958	2059	1176	1778	1227.48	1177.23	1103.48	1354.89	1862.51	1403.28	1583.37	1584.46	1588.66
Pira2	5.46592	4.03374	1.25666	3.20989	0.00132787	0.0717609	ENSMUSG00000089942	0.075018	0.424933	0.164663	0.025822	0	0.015092	0.036919	0	0	7	31	8	1	0	2	3	0	0	4.97456	28.8875	10.2902	1.58266	0	1.30181	2.15653	0	0
Lgals9	496.136	0.742383	0.231602	3.20543	0.00134862	0.0720539	ENSMUSG00000001123	22.7674	19.4377	27.1045	12.2668	10.9175	9.18247	18.1588	16.4484	16.6434	838	571	567	371	233	369	638	366	554	652.216	588.128	793.956	360.336	312.79	264.395	500.456	497.29	495.658
Cd2	85.1709	1.40383	0.437921	3.20567	0.0013475	0.0720539	ENSMUSG00000027863	3.92764	12.7091	3.95993	3.11272	2.54248	2.09976	4.18798	1.50262	2.55764	104	252	60	67	39	61	105	24	61	80.2441	274.248	82.7266	65.2109	51.9508	43.1187	82.3165	32.3993	54.3229
Diablo	3791.18	-0.303408	0.0946203	-3.20659	0.0013432	0.0720539	ENSMUSG00000029433	106.571	99.9149	102.412	127.819	140.898	127.12	121.15	127.666	126.231	4274	3250	2339	4101	3241	5754	4694	3022	4352	3308.59	3276.35	3250.61	4068.53	4374.26	3966.91	3618	4183.1	4074.3
Ell2	1295.47	0.714789	0.223194	3.20254	0.00136221	0.0725053	ENSMUSG00000001542	13.7817	27.438	14.8658	13.0939	9.80453	13.2182	12.9923	9.75492	10.8606	1609	2592	980	1252	674	1686	1399	686	1147	1249.82	2628.12	1378.51	1217.62	889.252	1204.85	1133.53	933.631	1023.91
Zfp703	81.7544	1.41548	0.442144	3.2014	0.0013676	0.0725187	ENSMUSG00000085795	0.878417	3.71757	2.6686	0.9724	0.584138	1.44532	0.866584	0.968879	0.685883	72	225	54	66	28	130	50	49	51	49.1995	219.921	152.833	55.8474	32.7211	81.365	46.695	57.2711	39.9366
Ccdc34	124.345	0.905667	0.283152	3.19852	0.00138137	0.0729746	ENSMUSG00000027160	4.28321	3.07549	6.81476	2.2765	2.30508	2.18856	2.94933	2.23915	3.19672	184	115	166	96	70	120	138	64	149	160.51	121.729	261.132	87.4781	86.3919	82.4342	106.33	88.5572	124.538
Usp9x	3854.42	0.490571	0.153464	3.19665	0.00139031	0.0731731	ENSMUSG00000031010	34.4712	40.475	35.4168	26.7608	20.3577	30.4427	32.4322	26.2641	23.1732	5814	4670	3189	3834	1881	5558	4501	2685	3684	4350.68	5395.3	4570.93	3463.46	2569.77	3862.14	3938.09	3498.58	3040.83
Med8	3326.35	-0.427603	0.133893	-3.19361	0.00140504	0.0735789	ENSMUSG00000006392	147.196	125.337	128.653	189.842	217.198	146.135	197.896	173.079	168.051	3776	2500	1871	3918	3209	3997	4832	2654	3843	2903.58	2611.33	2594.98	3839.96	4284.95	2897.39	3755.56	3603.2	3446.2
Uqcc2	3942.04	-0.513602	0.160857	-3.19291	0.00140846	0.0735789	ENSMUSG00000024208	528.744	457.807	405.102	659.546	766.116	570.302	567.09	808.074	636.411	4427	2950	2013	4309	3619	5238	4711	3924	4700	3409.33	3117.83	2670.94	4360.81	4940.5	3696.1	3517.84	5498.96	4266.03
Dynlt1c	145.492	1.16257	0.364676	3.18796	0.00143279	0.0742999	ENSMUSG00000000579	4.60682	16.8661	7.54466	3.71563	5.0973	4.35419	4.27136	5.58063	3.62538	142	329	93	139	78	139	116	74	151	105.28	407.574	177.32	87.0736	116.286	100.442	93.8419	135.095	86.5141
Nrxn1	19.857	2.9945	0.939288	3.18805	0.00143234	0.0742999	ENSMUSG00000024109	0.528042	0.939444	0.255588	0.005471	0.375891	0.012437	0.057558	0.065918	0.104708	23	25	23	1	4	3	12	9	6	39.1654	73.5957	19.3843	0.416088	27.8836	0.927154	4.10714	5.15994	8.07375
Dvl1	3001.39	-0.380419	0.119372	-3.18683	0.00143839	0.0743167	ENSMUSG00000029071	38.548	41.5605	35.2616	48.7508	59.8732	51.6993	49.9081	49.2629	45.0327	3210	2729	1716	3114	2861	4546	3617	2485	3278	2437.7	2775.92	2280.12	3161.26	3786.73	3286.09	3036.34	3287.8	2960.53
Sqle	7769.99	-0.504413	0.158543	-3.18156	0.00146485	0.0754077	ENSMUSG00000022351	112.769	97.5212	107.881	167.173	189.777	132.951	182.618	124.845	118.193	8066	5632	4350	9877	7929	10501	12373	5501	7620	6302.4	5756.57	6165.05	9580.35	10607.5	7468.36	9818.85	7363.69	6867.08
Ulk2	431.473	0.54272	0.170875	3.17611	0.00149263	0.0765581	ENSMUSG00000004798	4.0976	4.70786	5.74244	2.74585	3.38208	3.17791	3.53404	3.59631	3.74765	580	508	436	351	305	517	435	258	524	449.169	545.068	643.653	308.641	370.781	350.136	372.694	416.048	427.072
Gm16575	16.0675	2.29549	0.723121	3.17442	0.00150134	0.0767262	ENSMUSG00000089796	0.508869	2.22796	0.491998	0.216672	0.043721	0.301452	0.265903	0.250322	0.253357	20	70	11	7	1	13	10	6	9	15.6059	72.101	15.4285	6.81375	1.34099	9.29215	7.84526	8.10193	8.07754
Nek2	22.0884	2.73037	0.86092	3.17146	0.00151675	0.0769561	ENSMUSG00000026622	0.531926	1.35937	0.357887	0.114928	0.162745	0.108424	0.012505	0	0.288511	43	92	17	8	8	10	1	0	22	34.8376	94.0426	23.9673	7.7183	10.66	7.13738	0.78794	0	19.6441
Dpp3	2727.13	-0.397869	0.125415	-3.17242	0.00151175	0.0769561	ENSMUSG00000063904	47.7675	35.3878	43.163	58.7092	62.9325	48.2155	59.8271	52.6825	53.9285	3294	1911	1656	3239	2393	3470	3740	2198	3247	2493.95	1951.44	2304.32	3143.12	3286.12	2530.21	3005.07	2902.88	2927.09
Ntmt1	1883.26	-0.359248	0.113394	-3.16814	0.0015342	0.0771189	ENSMUSG00000026857	75.7793	64.8969	67.866	86.5658	104.257	84.7341	88.1344	92.8662	84.59	2165	1490	1090	2059	1721	2631	2325	1649	2185	1684.12	1523.33	1542.24	1972.73	2317.3	1892.76	1884.38	2178.14	1954.36
Ryr1	65.572	1.29882	0.410149	3.16669	0.00154183	0.0771189	ENSMUSG00000030592	0.204468	0.611327	0.323442	0.152433	0.145832	0.227475	0.098186	0.154872	0.156821	86	116	48	39	36	105	39	33	60	56.5816	178.677	91.521	43.2539	40.3603	63.27	26.1396	45.2301	45.1144
Parp14	368.383	0.847728	0.267683	3.16691	0.00154069	0.0771189	ENSMUSG00000034422	4.09358	3.99245	4.96146	2.36571	1.63652	4.02812	2.12409	1.72831	2.74531	481	547	507	241	131	647	304	215	359	480.998	495.481	596.109	285.036	192.316	475.726	240.112	214.322	335.346
Gbp5	84.5077	1.16059	0.366166	3.16958	0.00152661	0.0771189	ENSMUSG00000105504	2.35785	1.55218	2.21221	0.35522	1.24363	0.766084	0.925174	1.17751	1.0781	190	104	102	24	59	69	72	59	81	150.813	104.861	144.686	23.2981	79.5551	49.251	56.9309	79.4868	71.6876
Thoc3	1913.37	-0.477772	0.150929	-3.16555	0.00154792	0.07715	ENSMUSG00000025872	38.9629	29.2464	36.7167	55.9269	58.4366	42.5889	53.8421	44.0172	40.7885	2175	1261	1168	2425	1742	2499	2797	1516	2020	1649.94	1308.09	1589.85	2428.49	2474.89	1812.71	2193.51	1967.19	1795.63
Gm49384	157.879	-0.604103	0.190937	-3.16389	0.00155674	0.0773164	ENSMUSG00000113786	7.37449	7.4219	6.37303	11.865	11.2708	10.9194	10.2033	11.5231	9.71441	153	122	76	199	135	248	204	143	181	118.878	126.456	104.999	195.368	181.799	176.533	157.855	196.224	162.795
Ccdc12	2794.42	-0.369526	0.117131	-3.15481	0.00160603	0.0787231	ENSMUSG00000019659	159.091	160.928	162.135	199.508	244.429	194.716	193.759	210.149	217.588	2921	2226	1699	3014	2574	3939	3505	2276	3525	2255.67	2409.66	2350.39	2900.28	3465.62	2774.57	2642.68	3144.19	3206.77
Ift80	155.19	0.961858	0.30491	3.15456	0.00160739	0.0787231	ENSMUSG00000027778	2.85024	2.26006	3.19179	0.85753	1.51979	2.17266	1.34516	0.910653	1.79048	321	180	187	78	92	222	144	57	163	231.443	193.834	265.016	71.4019	123.424	177.325	105.084	78.0407	151.145
Cd72	33747.1	-0.438489	0.138896	-3.15696	0.00159422	0.0787231	ENSMUSG00000028459	1272.48	1084.73	1093.44	1793.07	1883.7	1261.19	1588.49	1469.07	1458.58	39302	25504	19244	41371	30389	41427	45485	27119	39582	29454	26520	25880.3	42559.7	43607.1	29342.4	35374.2	35887.3	35098.4
Nubp2	3368.18	-0.399198	0.126481	-3.15618	0.0015985	0.0787231	ENSMUSG00000039183	121.15	87.6183	110.153	137.422	162.409	123.503	149.629	137.062	139.437	3997	2292	2088	3680	3073	4413	4663	2715	4129	3092.97	2362.63	2875.57	3597.55	4146.84	3169.18	3675.1	3692.98	3700.77
Tsen54	1436.15	-0.441424	0.139977	-3.15353	0.00161306	0.0787275	ENSMUSG00000020781	38.2876	30.2903	35.9044	48.1112	59.0523	45.4038	49.5461	38.1499	46.8984	1561	1072	877	1592	1327	2068	1944	1052	1726	1244.33	1039.75	1193.17	1603.33	1919.42	1483.15	1549.14	1308.51	1584.52
Ocrl	149.166	0.93503	0.297277	3.14532	0.00165907	0.0794636	ENSMUSG00000001173	2.84921	2.83229	2.52058	1.98768	0.762223	1.23243	2.05037	1.13558	1.49901	277	235	141	181	46	131	188	64	140	222.559	233.671	201.324	159.208	59.5462	96.7599	154.082	93.6147	121.727
Pisd	6046.43	-0.505542	0.160677	-3.14632	0.00165337	0.0794636	ENSMUSG00000023452	120.526	104.388	101.418	173.161	195.492	122.01	179.572	142.414	126.139	6535	4486	3134	7801	6152	7250	9274	4747	6245	5106.57	4670.87	4393.76	7523.49	8283.25	5195.82	7319.79	6368.14	5556.22
Zdhhc16	1498.2	-0.449258	0.143158	-3.1382	0.00169991	0.0794636	ENSMUSG00000025157	45.2552	46.266	40.9124	60.6572	74.2536	67.5723	63.7141	50.727	50.1656	1673	1127	815	1667	1433	2355	2123	1146	1563	1203	1298.58	1111.61	1653.32	1973.43	1805.61	1629.21	1422.87	1386.16
Gfi1b	64.9077	1.04503	0.333029	3.13794	0.00170138	0.0794636	ENSMUSG00000026815	5.32406	2.69154	2.94687	1.17347	1.89408	2.06773	1.66788	1.70284	2.10377	99	65	70	40	46	97	32	45	79	141.726	75.6755	80.2127	32.0316	50.4264	55.3241	42.7142	47.8396	58.2193
Pip5k1a	1321.45	0.804234	0.255913	3.14261	0.0016745	0.0794636	ENSMUSG00000028126	17.73	40.1428	19.9602	14.4232	17.2232	18.781	12.0012	16.1723	12.2734	1628	2743	948	1091	869	1742	1047	896	980	1220.25	2918.07	1404.7	1017.89	1185.52	1299.19	794.629	1174.68	878.147
Gbp2	105.477	0.895665	0.284928	3.14348	0.00166952	0.0794636	ENSMUSG00000028270	2.37903	3.73347	2.77387	1.505	1.1181	1.62956	1.5665	1.59231	2.237	153	193	101	80	42	115	96	63	125	119.044	197.318	141.928	77.2221	55.9553	81.9578	75.4115	84.0895	116.368
Cdca8	348.506	-0.496475	0.158055	-3.14115	0.00168285	0.0794636	ENSMUSG00000028873	9.94099	8.20323	8.84535	13.3378	13.6215	15.0402	12.8423	10.3828	11.8072	399	260	201	375	314	653	383	252	422	295.08	257.184	268.474	405.971	404.379	448.725	366.736	325.259	364.75
Mcrs1	2629.1	-0.337946	0.107459	-3.14487	0.00166158	0.0794636	ENSMUSG00000037570	65.5667	61.6343	66.0938	77.3484	93.5674	83.1078	76.3405	78.9953	84.67	2920	2057	1638	2684	2329	3969	3186	2135	3366	2217.89	2202.35	2285.81	2682.73	3165.84	2825.43	2484.12	2820.32	2977.38
Spryd4	965.257	-0.428393	0.136356	-3.14172	0.00167956	0.0794636	ENSMUSG00000051346	24.8083	23.9191	27.815	34.8789	41.4753	29.3951	36.0923	34.8064	31.8311	953	735	608	1101	927	1239	1327	815	1105	743.542	757.185	852.44	1071.94	1243.23	885.522	1040.7	1100.97	991.797
Dock8	823.166	0.713672	0.226999	3.14394	0.00166689	0.0794636	ENSMUSG00000052085	9.33261	6.79469	10.8402	4.41118	6.42258	4.85335	3.97478	5.95204	7.41794	1486	952	931	440	559	853	569	613	1123	1129.09	868.247	1341.03	547.243	777.121	590.178	462.636	759.974	932.978
Bub3	5451.83	-0.31593	0.100676	-3.13808	0.00170056	0.0794636	ENSMUSG00000066979	124.213	96.7422	114.8	145.444	148.105	143.268	150.566	125.814	131.823	6589	4046	3444	6215	4369	8154	7588	4069	6372	5080.11	4178.96	4800.91	6099.57	6057.99	5889.39	5924.25	5430.5	5604.76
Igkv9-120	142.186	0.784963	0.249249	3.14931	0.00163657	0.0794636	ENSMUSG00000094872	72.8291	45.3581	47.5522	26.411	27.829	30.6385	35.9951	30.3744	42.9753	329	155	131	91	70	152	166	83	169	254.731	167.523	169.623	94.5944	96.8841	107.863	121.223	111.49	155.74
Gm27022	399.116	-1.13445	0.361368	-3.13931	0.00169346	0.0794636	ENSMUSG00000098155	18.779	23.5601	15.9254	42.6668	82.2557	32.0412	60.2381	25.8765	19.5522	269	265	133	490	675	504	841	218	250	208.205	276.34	181.211	485.029	912.664	357.414	642.551	303.303	225.33
Lrrc59	8741.16	-0.384469	0.12261	-3.1357	0.00171443	0.0798089	ENSMUSG00000020869	138.92	108.866	125.416	168.42	193.427	153.67	182.812	145.197	142.434	10152	6359	5186	10171	8233	12273	12683	6517	9436	7919.94	6554.8	7311.12	9845.93	11028.7	8805.31	10026.6	8735.95	8442.08
Snhg20	1652.02	-0.497957	0.159156	-3.12873	0.00175562	0.0814573	ENSMUSG00000086859	123.5	142.212	101.635	179.452	217.772	176.84	169.344	168.893	141.197	1652	1414	786	1931	1680	2512	2278	1308	1696	1270.62	1545.37	1069.23	1893.19	2240.8	1828.71	1676.17	1833.86	1510.2
Nr1h2	2274.43	-0.445944	0.142844	-3.1219	0.00179685	0.0830971	ENSMUSG00000060601	49.4986	57.5363	47.8434	61.1705	90.6347	72.0997	74.1066	64.7224	65.7983	2221	1991	1253	2275	2300	3460	2941	1799	2647	1708.56	2097.62	1688.63	2165.09	3128.84	2501.41	2460.9	2357.75	2361.09
Ncoa2	1134.45	0.515783	0.16537	3.11896	0.00181492	0.0834742	ENSMUSG00000005886	9.06059	10.217	10.332	5.59642	5.80787	9.01221	7.77895	6.66519	7.08085	1708	1257	1187	826	567	1681	1341	780	1194	1268.96	1511.34	1479.63	803.713	813.51	1268.64	1048.13	985.17	1030.96
Tmed8	482.301	0.645287	0.206913	3.11865	0.00181684	0.0834742	ENSMUSG00000034111	3.74261	4.6892	3.37976	1.91128	2.06228	2.395	2.93381	2.87299	3.13335	749	758	381	318	242	526	557	357	570	586.634	776.317	541.694	307.195	323.291	377.322	442.411	475.263	510.58
Fut8	1790.85	0.532355	0.170821	3.11644	0.00183048	0.0838278	ENSMUSG00000021065	39.2268	36.6616	43.91	24.0008	32.2255	32.934	20.5639	29.006	28.4278	2666	2128	1677	1424	1344	2591	1406	1262	1780	2159.75	2131.96	2472.07	1355.02	1774.49	1822.55	1089.25	1685.44	1627.14
Mapk1ip1l	2423.58	0.474133	0.152591	3.10723	0.00188852	0.0853906	ENSMUSG00000021840	28.6921	34.0209	32.215	23.5735	18.1598	28.7187	23.5376	20.6789	23.7616	3393	3136	2139	2301	1267	3641	2607	1503	2538	2630.23	3294.1	3019.69	2215.92	1665.47	2646.02	2075.75	2000.72	2264.31
Hacd2	2608.75	-0.541652	0.174252	-3.10844	0.00188079	0.0853906	ENSMUSG00000035376	73.2164	69.9491	62.0862	97.6	143.567	83.2634	105.115	95.8612	80.7257	2807	1973	1599	3283	2448	3050	3704	2037	2676	2085.96	2104.72	1808.76	2851.18	4090.6	2384.14	2880.46	2882.17	2390.8
Dzip3	548.22	0.642397	0.206746	3.10718	0.00188882	0.0853906	ENSMUSG00000064061	8.26053	5.9428	10.0802	6.61635	5.09679	4.85592	4.3943	4.30276	6.01497	837	564	572	589	339	598	509	313	610	719.724	546.886	898.059	591.119	444.128	425.25	368.34	395.65	544.821
Gm31812	8.84873	2.4544	0.78946	3.10896	0.00187748	0.0853906	ENSMUSG00000109599	0.630777	1.07237	0.972957	0.136305	0.064035	0.101458	0.154353	0.430335	0.12356	17	23	15	3	1	3	4	7	3	13.2362	23.7674	20.8765	2.93291	1.34387	2.13989	3.11606	9.53019	2.69544
Ninj1	1750.37	-0.438449	0.141279	-3.10344	0.00191287	0.085927	ENSMUSG00000037966	71.3771	66.9354	56.9073	73.945	95.0634	107.355	88.696	89.9526	80.9501	1952	1457	874	1645	1498	3199	2330	1479	1985	1512.38	1497.97	1232.95	1606.6	2014.5	2286.33	1808.03	2011.5	1783.12
Gm10184	627.766	-0.561372	0.180833	-3.10437	0.00190685	0.085927	ENSMUSG00000066878	13.5953	10.3509	12.0143	18.0744	21.1473	13.0267	21.6954	18.3245	15.2469	675	412	339	740	612	710	1029	558	685	527.217	423.739	477.156	718.889	819.879	507.97	809.869	750.69	614.482
Sirpa	69.3152	1.21569	0.391844	3.10248	0.00191908	0.0859319	ENSMUSG00000037902	2.0813	1.76503	1.9024	0.462775	1.85212	0.990029	0.654225	0.796037	0.592388	151	102	55	37	25	106	60	42	49	114.921	102.935	107.409	26.2019	102.279	54.9449	34.753	46.3879	34.0042
Clk1	4355.22	0.724956	0.234055	3.09737	0.00195245	0.0860708	ENSMUSG00000026034	132.928	306.912	153.065	98.533	119.759	128.618	132.064	117.302	136.079	4647	7673	3152	3519	2953	5052	4675	2598	4616	3842.43	9370.29	4524.2	2920.6	3462.21	3736.86	3672.62	3578.52	4089.24
Ddx6	3672.13	0.431635	0.139239	3.09995	0.00193553	0.0860708	ENSMUSG00000032097	30.8655	41.464	33.6468	24.9686	23.6883	30.6468	27.4614	25.1525	27.523	4872	5255	3008	3215	2115	5209	3972	2462	3934	3767.75	5345.98	4199.79	3125.37	2891.98	3760.18	3225.01	3240.37	3492.73
Coq5	1780.78	-0.405005	0.130759	-3.09734	0.00195269	0.0860708	ENSMUSG00000041733	39.9528	33.4671	41.8284	57.7941	56.8158	43.9336	55.753	47.0338	47.2488	1929	1303	1141	2258	1546	2230	2534	1366	2079	1486.67	1315.32	1591.53	2205.2	2114.41	1643.15	1995.88	1847.07	1827.76
Uqcrq	7021.17	-0.391523	0.126353	-3.09863	0.00194416	0.0860708	ENSMUSG00000044894	830.019	908.928	811.791	1043.57	1241.94	998.606	1080.97	1272.91	1131.66	7187	6383	3795	7088	6119	9954	8498	6616	8783	5523.42	6388.46	5523.83	7121	8265.6	6679.27	6920.42	8939.71	7828.83
Orai1	2336.17	-0.518909	0.167487	-3.09821	0.00194692	0.0860708	ENSMUSG00000049686	63.3015	44.1904	50.9363	80.7929	90.1637	56.5599	86.2705	79.1123	65.7999	2763	1521	1250	2907	2237	2572	3546	2116	2526	2123.32	1565.59	1747.05	2778.91	3024.73	1906.89	2783.97	2800.61	2294.5
Usp6nl	1387.12	0.429501	0.138795	3.0945	0.00197143	0.0866261	ENSMUSG00000039046	11.5968	14.7857	11.7181	9.37842	8.87319	9.69502	10.7018	8.24724	10.4917	1935	1717	1247	1301	742	1884	1618	838	1621	1487.28	2003.36	1536.68	1233.33	1138.1	1249.81	1320.47	1116.25	1398.8
Ehd2	21.3681	1.4201	0.459269	3.09208	0.0019876	0.0870657	ENSMUSG00000074364	0.410064	0.208734	0.389552	0.132287	0.112491	0.133453	0.107957	0.141807	0.128975	56	23	30	15	9	20	14	12	16	43.842	23.571	42.5872	14.5028	12.0284	14.3411	11.1042	16.0009	14.3353
Golim4	610.893	0.409363	0.132511	3.08928	0.00200643	0.0876183	ENSMUSG00000034109	12.2978	12.1561	10.7337	8.49382	8.73177	9.45192	8.28394	8.78108	9.87431	987	728	470	575	389	743	639	453	655	746.639	779.515	666.361	528.791	530.198	576.79	483.861	562.648	623.234
mt-Co3	112803	0.611022	0.197956	3.08665	0.00202425	0.0881236	ENSMUSG00000064358	10405.8	11917.4	11669.2	6267.09	5796.77	10566.5	5953.86	7833.77	8554.33	168983	152287	109657	81979	54053	188248	93915	75152	124297	130975	158433	150187	80886.9	72972.3	133679	72096.7	104062	111934
Snx3	8029.13	-0.298056	0.0968141	-3.07864	0.0020795	0.0892856	ENSMUSG00000019804	273.541	239.026	278.038	340.991	347.85	295.74	336.437	312.139	331.496	9007	6361	5184	9230	6714	10737	10601	6303	9943	7052.42	6508.91	7329.86	9014.83	8969.36	7663.74	8344.88	8493.18	8884.97
Pdrg1	4502.25	-0.37471	0.121587	-3.08182	0.00205739	0.0892856	ENSMUSG00000027472	182.24	170.823	153.883	252.727	245.004	207.113	235.632	199.829	191.494	5159	3877	2448	5723	3994	6427	5610	3498	4879	3950.94	3911.55	3411.33	5618.32	5312.3	4513.15	4914.64	4572.15	4315.92
Rpn1	9368.74	-0.419671	0.136337	-3.07819	0.00208259	0.0892856	ENSMUSG00000030062	135.163	105.067	126.521	172.289	191.308	137.888	196.659	145.899	149.004	11029	6681	5924	11259	7979	11601	13437	7457	10669	8257.45	6779.57	7903.64	10793.1	11689	8467.02	11558.6	9406.91	9463.43
Fam8a1	562.741	0.41998	0.136339	3.08041	0.00206714	0.0892856	ENSMUSG00000069237	10.2653	10.212	11.0488	7.20999	7.86429	9.56503	8.4822	6.92741	7.62032	804	648	511	532	348	738	652	353	602	644.927	677.632	709.784	464.483	494.139	604.001	512.679	459.318	497.705
Gvin3	271.393	1.07368	0.348758	3.07858	0.00207991	0.0892856	ENSMUSG00000073902	2.38021	2.54242	3.00215	0.555906	1.07325	2.39311	1.29702	0.835912	1.4673	469	404	333	91	124	517	242	102	263	367.326	413.772	473.423	87.9107	165.656	370.861	192.205	135.797	235.585
Mea1	3268.63	-0.437352	0.142573	-3.06757	0.00215808	0.0900584	ENSMUSG00000002768	180.554	155.286	169.907	226.068	283.381	181.256	231.591	243.736	218.383	3550	2418	1901	3622	3246	3899	4430	2861	3882	2762.33	2509.56	2658.24	3546.25	4336.45	2787.42	3408.56	3935.48	3473.36
Cdk1	47.0131	1.66383	0.542102	3.06922	0.00214616	0.0900584	ENSMUSG00000019942	3.10164	5.56703	2.95543	1.9399	0.290519	1.35774	0.637763	1.84132	1.40539	89	86	37	35	9	48	14	26	48	66.7327	126.508	65.0196	42.7983	6.2514	29.3617	13.201	41.8103	31.4346
Pik3cg	47.3485	1.70743	0.556524	3.06802	0.00215482	0.0900584	ENSMUSG00000020573	0.397853	1.15217	0.842108	0.041538	0.340025	0.132928	0.280891	0.384466	0.304821	58	131	71	3	31	18	40	33	43	42.5445	130.132	92.0797	4.55471	36.365	14.2874	28.8974	43.3895	33.8865
Nipbl	3790.56	0.41694	0.135664	3.07332	0.00211688	0.0900584	ENSMUSG00000022141	20.107	23.9916	22.1654	16.2969	14.5154	19.6956	18.1607	14.2092	17.7836	5148	4964	3195	3471	2180	5534	4409	2261	4140	4032.83	5082.41	4545.85	3351.71	2911.7	3970.52	3504.26	3007.73	3708.03
Nmt2	2688.79	-0.515001	0.167842	-3.06837	0.00215227	0.0900584	ENSMUSG00000026643	24.0983	24.2746	20.1625	33.7272	43.5637	29.3848	38.6455	28.4248	25.3009	2729	2176	1312	3181	2937	3580	4223	2014	2662	2147.72	2285.04	1837.44	3082.27	3883.03	2632.27	3313.54	2673.6	2344.18
Ppie	4848.49	-0.437671	0.142434	-3.07281	0.00212053	0.0900584	ENSMUSG00000028651	194.96	167.965	184.735	263.207	296.509	187.397	272.097	245.455	235.825	5220	3617	2848	5775	4600	5536	7037	3988	5757	4086.03	3718.12	3959.24	5656.54	6215.06	3947.6	5486.41	5429.19	5138.22
Fastk	4630.61	-0.415184	0.13517	-3.07156	0.00212944	0.0900584	ENSMUSG00000028959	143.372	129.793	139.714	174.528	226.5	147.781	210.25	176.737	179.228	5146	3376	2828	5217	4450	5376	6644	3877	5448	3848.51	3680.28	3834.51	4804.32	6080.62	3987.66	5430.39	5007.31	5001.95
Ssbp1	6570.45	-0.352624	0.11483	-3.07084	0.00213455	0.0900584	ENSMUSG00000029911	301.407	236.583	318.374	376.12	396.955	350.39	409.219	348.334	329.677	7316	4646	4244	7451	5761	9555	9449	5195	7215	5720.43	4742.48	6178.69	7319.83	7534.76	6684.08	7471.93	6977.14	6504.69
Carmil2	732.152	-0.638822	0.208065	-3.07031	0.0021384	0.0900584	ENSMUSG00000050357	7.53996	8.52844	5.9282	10.8709	14.0017	8.3318	14.4123	13.0633	9.04315	672	628	298	823	733	787	1277	752	746	533.068	637.019	429.073	788.025	990.039	592.338	980.506	974.412	664.889
Aatf	5362.65	-0.361112	0.117806	-3.06531	0.00217441	0.0903003	ENSMUSG00000018697	138.052	109.538	125.274	173.126	183.511	147.266	176.163	144.676	144.127	6250	4005	3225	6456	4910	7287	7598	4025	5875	4888.72	4096.98	4536.17	6286.56	6499.32	5241.66	6001.61	5406.97	5305.9
Gm49911	23.5869	2.53939	0.828511	3.065	0.00217668	0.0903003	ENSMUSG00000117219	3.36796	51.9535	9.70004	1.74988	1.18606	9.32558	3.89026	3.1287	3.46044	10	117	18	4	2	30	12	6	9	7.84325	127.788	23.0983	4.17867	2.76241	21.8282	8.71581	7.68954	8.37765
Gps2	2104.92	-0.398198	0.13016	-3.0593	0.00221852	0.0914978	ENSMUSG00000023170	95.4188	87.6946	94.5322	123.798	146.85	99.4127	134.391	118.586	117.942	2314	1407	1327	2405	1975	2547	3041	1772	2574	1745.68	1694.54	1768.43	2322.43	2686.95	1828.05	2365.38	2289.66	2243.16
Tomm5	7564.81	-0.353816	0.115642	-3.05958	0.00221648	0.0914978	ENSMUSG00000078713	732.676	577.494	662.673	867.748	948.082	763.76	799.967	869.172	839.095	8989	5521	4747	8471	6602	10276	9616	6229	9172	6942.54	5779.64	6420.69	8431.39	8984.74	7274.08	7292.54	8691.97	8265.69
Tnfrsf10b	121.255	1.06348	0.347868	3.05714	0.00223458	0.0918913	ENSMUSG00000022074	3.48474	2.27114	3.10132	0.890536	1.57939	1.85461	0.688249	1.78417	1.72268	263	139	139	61	65	167	54	86	128	214.277	147.501	194.997	56.1507	97.1286	114.623	40.7147	115.784	110.122
Mcm10	63.1568	1.53401	0.502169	3.05477	0.00225237	0.0923536	ENSMUSG00000026669	1.41574	4.36882	1.29282	0.42696	0.65754	1.27818	0.929946	0.488204	1.20755	107	178	69	34	19	71	16	22	78	64.9102	211.564	60.61	20.0732	30.1513	58.9028	41.0193	23.6232	57.5568
Tusc2	2025.35	-0.424977	0.13927	-3.05146	0.0022773	0.0927779	ENSMUSG00000010054	55.7505	43.8988	53.6099	71.4633	77.2215	55.5322	82.535	64.5335	65.086	2269	1416	1228	2377	1822	2445	3200	1577	2381	1757.28	1461.08	1727.3	2309.1	2433.22	1759.09	2502.67	2145.85	2132.53
Lgmn	646.923	0.578065	0.189377	3.05246	0.00226973	0.0927779	ENSMUSG00000021190	19.3429	24.6292	20.8528	12.9655	10.167	16.8106	15.6568	15.9273	16.3414	921	941	554	521	281	886	700	480	712	722.392	971.515	796.328	496.523	379.749	631.028	562.542	627.767	634.458
Cdk14	39.0076	1.73712	0.569401	3.05078	0.00228245	0.0927779	ENSMUSG00000028926	0.449177	0.956064	1.54383	0.29854	0.084309	0.173184	0.496657	0.211607	0.509869	58	80	55	32	4	19	20	15	55	32.6262	73.3471	114.663	22.2356	6.12455	12.6436	34.7061	16.2212	38.5008
Hmga1	8583.5	-0.315018	0.103333	-3.04858	0.00229924	0.0931917	ENSMUSG00000046711	286.357	238.686	262.142	329.502	368.607	294.714	331.253	324.257	330.336	10106	6652	5392	9460	7513	11387	11109	6881	10575	7862.29	6921.55	7360.01	9277.14	10122.2	8132.96	8750.2	9396.04	9429.11
Ptgs2	19.478	3.18548	1.04558	3.04661	0.00231437	0.0935363	ENSMUSG00000032487	0.135504	0.871647	0.495319	0.091857	0	0.192935	0.035657	0	0.009326	16	83	33	9	0	25	4	0	1	12.5369	85.1781	46.8598	8.71463	0	17.9418	3.1738	0	0.897004
Atad2	1019.87	0.592222	0.194607	3.04317	0.00234101	0.0940739	ENSMUSG00000022360	15.398	22.7814	16.7942	10.2035	12.6904	16.7087	11.3281	10.4243	12.733	1410	1608	815	773	675	1582	938	582	1048	1073.02	1676.76	1196.68	729.104	884.443	1170.3	759.451	766.644	922.432
Zcrb1	4222.56	-0.464434	0.152585	-3.04378	0.00233626	0.0940739	ENSMUSG00000022635	268.418	199.857	255.985	378.749	390.279	260.116	373.439	317.75	299.289	4717	2764	2595	5442	3997	4940	6412	3317	4642	3659.89	2878.22	3569.01	5295.5	5322.12	3564.82	4898.65	4572.45	4242.38
Ptpre	111.489	1.02452	0.336845	3.04152	0.0023539	0.0943232	ENSMUSG00000041836	1.45474	1.95973	2.09248	0.484568	0.899831	0.689676	0.919355	1.48096	1.00926	183	196	136	44	51	91	96	102	106	129.74	184.6	190.821	44.314	80.2606	61.8228	78.8809	139.392	93.5734
Myh9	2514.89	0.539998	0.177645	3.03976	0.0023677	0.0943606	ENSMUSG00000022443	22.9037	26.2961	22.1581	14.0061	11.9776	19.4436	16.2906	18.8095	18.7016	4025	3270	2110	1844	1197	3629	2351	2017	2935	2976.16	3609.03	2944.14	1866.24	1556.59	2539.46	2036.53	2579.49	2526.34
Gbp7	61.738	1.38986	0.457237	3.03969	0.00236821	0.0943606	ENSMUSG00000040253	0.898444	1.94409	0.566065	0.266278	0.409785	0.623693	0.431494	0.657893	0.278934	118	205	37	19	27	97	49	36	28	80.0491	182.811	51.5712	24.3276	36.5153	55.8536	36.9541	61.8625	25.6982
Retsat	79.7791	1.71551	0.56467	3.03807	0.00238095	0.0946008	ENSMUSG00000056666	1.10639	6.24658	2.12577	0.292394	0.827965	1.28381	0.630769	1.35403	1.53745	54	203	39	19	38	82	47	54	84	49.8126	297.123	98.7591	13.5138	37.3228	58.135	27.2788	64.4083	71.6588
Rapgef6	3303.53	0.53113	0.174938	3.0361	0.00239657	0.0949539	ENSMUSG00000037533	23.6713	31.2153	28.8773	15.1024	23.3455	24.811	19.0964	16.1364	19.3066	4533	4702	3060	2428	2126	5163	3253	1931	3332	3426.19	4772.05	4273.89	2241.48	3379.46	3609.52	2659.15	2464.92	2905.08
Plcb2	195.632	0.969776	0.319628	3.03408	0.0024127	0.0953252	ENSMUSG00000040061	2.08419	2.99921	5.15539	1.16771	2.64256	1.3405	2.0574	1.486	1.93869	257	289	219	117	90	171	229	123	205	172.491	262.17	436.281	99.0974	218.729	111.509	163.812	129.794	166.801
Klf6	1239.39	0.646959	0.213343	3.03249	0.00242548	0.0955627	ENSMUSG00000000078	14.8012	28.4386	14.5617	12.825	11.2591	12.1611	14.1162	12.6623	12.2111	1605	2269	892	1138	662	1391	1499	788	1153	1213.96	2463.55	1221.22	1078.61	923.556	1002.53	1113.85	1096.04	1041.17
Tmem131	1472.81	0.402159	0.132729	3.02993	0.00244609	0.0955807	ENSMUSG00000026116	14.0635	12.466	12.9267	11.1214	8.43553	10.4822	9.61144	9.38851	11.2151	2220	1559	1250	1589	798	1917	1604	994	1725	1834.1	1717.13	1723.83	1487.26	1100.26	1374.03	1205.92	1292.2	1520.52
Fam13b	736.972	1.00473	0.331507	3.03079	0.00243918	0.0955807	ENSMUSG00000036501	14.7517	39.067	11.1048	10.0893	10.0934	16.4034	9.81831	10.9562	8.80053	883	1425	392	599	393	1128	677	437	531	727.493	2035.48	560.116	510.659	497.874	813.588	466.13	570.156	451.259
Stag3	105.22	-1.88872	0.623654	-3.02847	0.00245792	0.0955807	ENSMUSG00000036928	0.538173	1.51237	0.671738	1.53211	2.32623	11.1514	2.77717	1.25322	1.53187	57	69	44	41	39	426	126	37	69	21.6726	64.3271	27.6608	63.2667	93.6903	451.37	107.595	53.2624	64.1314
Hlcs	378.336	0.724657	0.239202	3.02948	0.00244974	0.0955807	ENSMUSG00000040820	4.90484	8.65832	4.83884	3.22741	2.83261	4.29733	4.04267	4.37685	3.81052	538	522	304	307	177	430	438	325	346	398.316	742.666	401.807	268.76	230.066	350.727	315.851	375.129	321.702
Ttc1	3141.99	-0.38008	0.125512	-3.02824	0.00245982	0.0955807	ENSMUSG00000041278	97.0694	83.4671	94.4401	127.092	146.72	113.986	124.379	110.281	101.976	3402	2303	1938	3755	2980	4434	4501	2356	3369	2703.07	2454.92	2689.1	3629.05	4086.17	3190.37	3332.13	3241.01	2952.13
Pgp	2484.65	-0.350012	0.115628	-3.02704	0.00246963	0.0956984	ENSMUSG00000043445	41.8132	37.2302	39.3114	52.5283	55.1508	42.1435	56.2023	50.5565	48.7184	2780	1975	1478	2883	2134	3078	3564	2069	2935	2170.5	2041.22	2086.61	2796.01	2863.19	2198.83	2806.73	2769.68	2629.06
Manf	4735.15	-0.310851	0.102762	-3.02496	0.00248664	0.0960933	ENSMUSG00000032575	269.494	224.564	292.481	319.555	324.825	342.614	329.195	326.967	326.606	5422	3549	3193	5011	3540	7498	5953	3977	5816	4095.9	3604.86	4545.42	4980.19	4937.58	5233.95	4813.42	5244.61	5160.43
Cd44	11742.2	0.44832	0.148409	3.02085	0.00252067	0.0963497	ENSMUSG00000005087	171.771	132.354	166.362	142.439	92.8913	108.811	116.534	114.272	120.215	19235	11590	10989	13220	6274	13887	13015	7922	12309	15284	12438.6	15136.3	12996.2	8266.4	9731.44	9975.63	10730.8	11120.1
Man2a1	194.004	1.1327	0.374942	3.02101	0.00251933	0.0963497	ENSMUSG00000024085	2.37817	3.49597	2.16552	1.49014	0.633311	0.983855	0.710007	1.44487	2.15293	288	356	230	120	70	175	127	118	196	261.463	405.959	243.447	167.993	69.6365	108.721	75.0983	167.649	246.07
Ifit1	23.095	2.205	0.729867	3.02109	0.00251863	0.0963497	ENSMUSG00000034459	0.366579	1.23996	1.0097	0.088659	0.376446	0.080175	0.046181	0.166713	0.404368	25	68	39	5	15	6	3	7	25	19.5462	69.831	55.094	4.84747	20.0747	4.29683	2.36896	9.38142	22.4147
Slit3	54.4895	1.36208	0.451013	3.02004	0.00252743	0.0963497	ENSMUSG00000056427	2.99972	3.18337	0.927434	0.492224	1.08856	0.755321	1.25929	0.976649	1.07456	133	155	73	18	13	43	34	27	61	112.966	126.62	35.7131	19.0077	40.999	28.59	45.6242	38.8162	42.0688
Selenop	29.2635	1.41244	0.467566	3.02083	0.00252079	0.0963497	ENSMUSG00000064373	1.21812	1.5093	0.906835	0.370518	0.396922	0.504857	0.440372	0.226771	0.818184	64	63	26	16	12	29	22	7	37	49.3501	63.9377	37.5681	15.3364	15.8649	20.4832	17.1015	9.66375	34.0655
Tpgs2	857.472	-0.399197	0.132245	-3.01862	0.00253928	0.0964703	ENSMUSG00000024269	8.53657	6.93231	8.65599	11.1543	10.572	9.43981	12.3302	9.49935	11.2843	936	614	537	1017	680	1132	1286	646	1125	733.394	629.041	760.407	982.642	908.368	815.14	1019.12	861.299	1007.83
Flnb	280.22	0.84214	0.279037	3.01803	0.00254427	0.0964703	ENSMUSG00000025278	1.80114	2.69976	1.4737	0.79801	0.800451	1.54166	1.01584	1.35477	1.24645	445	539	205	164	116	418	238	208	280	348.594	551.879	291.647	158.372	154.938	299.898	189.146	276.723	250.788
Fcf1	8138.74	-0.356238	0.1183	-3.01132	0.00260114	0.0967823	ENSMUSG00000021243	606.33	499.673	598.53	832.229	748.909	635.485	803.465	721.805	668.229	9231	5970	5283	10175	6519	10595	11884	6472	9097	7144.08	6218.34	7211.36	10055	8825.18	7525.95	9107.61	8976.08	8185.1
Emc4	2953.96	-0.31115	0.10335	-3.01063	0.00260705	0.0967823	ENSMUSG00000027131	163.735	133.333	143.9	182.488	201.923	166.612	196.345	176.67	182.486	3560	2299	1797	3222	2531	3974	4122	2301	3565	2766.65	2379.88	2486.35	3162.06	3412.09	2830.09	3192.22	3150.2	3206.09
Cd93	141.323	1.02419	0.340196	3.01059	0.00260739	0.0967823	ENSMUSG00000027435	1.16234	1.4945	1.76681	0.488482	0.607151	0.49664	0.756063	1.34421	0.703712	209	217	179	73	64	98	129	150	115	163.677	222.279	254.401	70.5344	85.5073	70.2927	102.426	199.768	103.017
Tbl1xr1	4317.69	0.461097	0.153101	3.01171	0.00259778	0.0967823	ENSMUSG00000027630	45.4261	29.8795	41.1377	30.6594	22.5446	27.6581	30.2081	28.4094	30.8775	6813	4524	3869	4203	2288	5133	4892	3069	4927	6045.71	4200.13	5598.32	4184.12	3000.8	3699.81	3867.81	3990.35	4272.15
Zfp326	642.969	0.832144	0.275956	3.0155	0.00256559	0.0967823	ENSMUSG00000029290	13.2298	30.0709	12.0026	8.86624	9.31102	13.1252	10.1279	9.83854	12.1341	759	1480	402	412	383	802	598	411	655	629.578	1511.43	584.043	432.646	443.144	627.792	463.674	494.119	600.295
Nfatc3	3407.62	0.409055	0.135794	3.01233	0.0025925	0.0967823	ENSMUSG00000031902	38.106	28.1933	37.255	23.1604	23.4191	27.4145	26.5553	27.0066	29.6341	5747	3405	3104	2826	1914	4485	3680	2494	4016	4400.66	3438.92	4398.74	2743.12	2705.17	3182.03	2950.16	3292.05	3557.73
Ero1b	502.527	0.872176	0.289557	3.0121	0.00259447	0.0967823	ENSMUSG00000057069	6.03869	13.0232	5.92664	3.01365	3.74626	5.29364	4.75563	4.94297	6.04929	651	1052	351	277	236	614	493	329	594	504.896	1150.07	506.691	258.375	313.264	444.865	382.61	436.167	525.806
Gm11613	25.0739	1.65292	0.548254	3.01487	0.00257088	0.0967823	ENSMUSG00000085586	0.630281	1.74916	1.11069	0.493282	0.174355	0.648516	0.298112	0.298692	0.314482	31	69	31	20	5	35	14	9	14	24.2121	70.9699	43.6281	19.4308	6.6986	25.0399	11.0173	12.1095	12.559
Gm45140	1299.71	0.481403	0.160012	3.00854	0.00262508	0.0971833	ENSMUSG00000107928	15.4191	15.7576	13.33	10.613	10.1808	13.8914	12.3547	8.4292	9.26779	2068	1716	1015	1176	791	2057	1583	705	1136	1623.18	1751.96	1435.3	1145.11	1071.27	1469.35	1250.73	936.531	1013.94
Syce2	1435.7	-0.679277	0.225961	-3.00617	0.00264563	0.0974324	ENSMUSG00000003824	80.9932	69.2125	48.8905	124.585	134.77	77.6002	127.763	111.06	71.0267	1620	1072	543	1997	1525	1560	2380	1280	1227	1218.91	1100.15	752.354	1922.58	2028.47	1173.81	1849.81	1763.94	1111.23
Get4	2671.81	-0.374247	0.124477	-3.00655	0.00264235	0.0974324	ENSMUSG00000025858	80.997	68.3227	70.3438	93.8271	109.138	85.8978	98.494	104.973	83.4726	3090	2080	1551	2935	2389	3606	3454	2469	2922	2407.17	2144.66	2137.67	2859.34	3243.92	2565.88	2816.12	3292.51	2579
Bspry	1040.23	-0.534037	0.177784	-3.00386	0.00266581	0.0975301	ENSMUSG00000028392	21.7155	16.8412	17.05	31.1765	33.2427	20.4035	29.5579	26.617	22.0378	1181	723	528	1385	1048	1205	1509	880	1078	915.372	749.807	734.902	1347.58	1401.45	864.465	1198.68	1184.11	965.737
Zfp292	1627.92	0.36497	0.121514	3.00351	0.00266883	0.0975301	ENSMUSG00000039967	8.96716	7.48324	9.89375	6.36805	6.62003	7.0138	7.85502	6.17645	7.29888	2436	1643	1513	1438	1055	2091	2023	1043	1803	1908.17	1681.9	2152.78	1389.53	1408.89	1500.14	1608.09	1387.1	1614.66
Fez2	346.982	-0.441435	0.146974	-3.00349	0.00266903	0.0975301	ENSMUSG00000056121	8.00762	6.92903	6.81343	10.0268	10.7774	11.2424	10.1571	8.74886	8.9369	380	277	183	400	302	593	469	258	390	301.469	275.523	262.289	387.078	405.795	425.416	367.883	347.613	349.774
Reep6	361.899	-0.584307	0.194662	-3.00166	0.00268516	0.097866	ENSMUSG00000035504	7.4215	7.07128	5.32096	11.0162	11.4235	7.60203	9.63299	11.2698	9.38415	388	269	157	462	345	441	459	350	444	296.195	298.079	217.146	450.834	455.971	304.952	369.869	474.688	389.353
Vta1	2065.92	-0.371429	0.123855	-2.99891	0.00270952	0.0980874	ENSMUSG00000019868	71.906	58.8251	72.6235	89.6225	100.566	90.9544	97.8633	71.9849	81.4967	2330	1746	1291	2259	1731	3278	2640	1551	2259	1789.42	1546.61	1848.51	2287.47	2503.33	2275.46	2343.13	1890.31	2109.08
Rtf2	3134.08	-0.250988	0.0836797	-2.99939	0.00270521	0.0980874	ENSMUSG00000027502	66.9387	66.1629	67.4652	82.6727	83.3087	80.2169	79.9496	78.7259	78.0385	3490	2642	1990	3710	2481	4520	3985	2488	3729	2714.16	2833.48	2797.15	3437.32	3378.33	3269.19	3118.72	3368.86	3289.5
Daam1	131.511	0.96162	0.320688	2.99862	0.00271209	0.0980874	ENSMUSG00000034574	1.26197	2.30968	1.10301	0.696241	0.545554	1.21489	0.808105	0.797769	0.815265	198	292	97	87	50	200	120	76	115	152.774	295.326	136.539	86.4291	66.053	147.827	94.1174	101.926	102.603
Il12b	48.4267	1.68955	0.56456	2.99268	0.00276541	0.099306	ENSMUSG00000004296	3.31664	2.43404	1.52702	1.65792	0.557962	0.375357	0.204212	0.850241	0.886474	153	90	40	63	15	19	9	24	37	119.469	92.6041	56.244	61.2377	20.1008	13.5899	7.07682	32.3224	33.1959
Zfp871	1787.48	0.61865	0.206733	2.99251	0.00276691	0.099306	ENSMUSG00000024298	9.66212	9.56963	10.4039	6.40573	4.91154	9.29758	5.99001	4.66383	7.75609	2815	2252	1726	1576	852	3011	1679	839	2061	2221.12	2323.49	2445.52	1509.96	1129.2	2148.25	1324.73	1131.48	1853.55
Ap2m1-ps	307.877	-0.59181	0.197678	-2.99382	0.00275512	0.099306	ENSMUSG00000081272	10.4784	8.68015	8.83042	14.5049	18.5055	10.4544	13.5917	14.438	14.0549	323	213	155	366	331	353	402	269	390	251.706	219.824	216.387	357.199	444.443	252.002	314.039	365.039	350.257
Zdhhc21	1025.48	0.434609	0.145399	2.98909	0.00279813	0.100172	ENSMUSG00000028403	8.20336	7.38192	7.53221	5.87775	7.016	4.83833	6.16519	6.00837	4.7801	1599	1057	890	1117	707	1170	961	825	986	1286.5	1222.74	1207.85	945.206	1100.42	762.654	930.173	994.441	779.319
Ppil2	3924.4	-0.383491	0.128442	-2.98572	0.00282908	0.100535	ENSMUSG00000022771	103.636	96.7218	97.8205	135.188	150.667	130.867	151.426	119.387	101.478	4219	3159	2308	4240	3530	5928	5554	3154	4143	3315.73	3268.75	3200.5	4435.96	4821.49	4208.77	4661.26	4031.57	3375.56
Pde3b	1546.38	0.446966	0.149742	2.98491	0.0028366	0.100535	ENSMUSG00000030671	13.4438	13.8175	16.4079	13.3273	10.8006	9.18962	10.052	10.9742	10.3766	2306	1798	1521	1732	1042	1628	1503	1001	1544	1692.32	1837.13	2111.98	1720.3	1359.77	1162.72	1217.34	1457.95	1357.93
Rbbp7	23261	-0.383345	0.128429	-2.98489	0.00283679	0.100535	ENSMUSG00000031353	463.181	398.119	462.117	607.951	681.502	482.76	672.023	528.65	522.692	25355	17401	14336	27699	21762	29086	34795	17855	25877	19812.5	17986.7	20212	26665.8	29155	20755.1	27654.4	23864.4	23243.2
Sf3b4	8360.53	-0.325562	0.109064	-2.98505	0.0028353	0.100535	ENSMUSG00000068856	204.586	173.778	200.749	244.544	275.165	215.534	243.07	251.404	236.306	9554	6249	5290	9489	7460	10807	10799	7133	9977	7397.66	6636.81	7422.85	9067.61	9951.93	7833.42	8456.35	9594.64	8883.5
Psmc3	7601.23	-0.275024	0.0923367	-2.97849	0.00289676	0.101752	ENSMUSG00000002102	272.438	224.651	261.87	299.43	313.144	336.965	312.783	288.916	304.566	9133	6084	4895	7731	5881	13494	9364	5806	8921	7009.7	6105.04	6889.6	7899.97	8058.05	8714.39	7742.4	7845.3	8146.58
Sgta	2952.05	-0.350206	0.117767	-2.97371	0.00294221	0.101752	ENSMUSG00000004937	75.1588	60.2392	67.1441	88.8784	102.39	77.9572	88.2155	80.2869	84.3365	3466	2152	1775	3378	2805	3934	3896	2277	3572	2710.86	2294.85	2476.35	3287.17	3693.49	2826.18	3061.07	3056.18	3162.32
Aldh2	704.476	0.549887	0.185	2.97237	0.00295513	0.101752	ENSMUSG00000029455	29.915	23.8067	27.7152	19.7263	15.3811	13.7664	21.2708	19.1172	22.9811	1237	823	568	644	413	640	775	545	793	960.952	807.715	910.344	649.764	494.144	444.475	657.349	648.1	767.442
Trim24	609.813	0.445628	0.149975	2.97135	0.00296491	0.101752	ENSMUSG00000029833	8.16884	11.4914	9.49855	7.31752	7.16757	6.81167	8.18383	6.87421	7.09854	782	809	528	568	399	717	753	399	619	605.487	899.635	719.909	556.169	531.336	507.473	583.581	537.741	546.985
Tespa1	937.577	-0.427959	0.143801	-2.97605	0.00291988	0.101752	ENSMUSG00000034833	36.9722	44.237	33.4775	52.952	58.0918	49.3362	60.1307	43.5722	49.5556	947	827	522	1057	826	1343	1467	672	1038	716.783	905.373	664.279	1052.78	1125.96	961.289	1121.21	891.365	999.157
Spcs2	11592.5	-0.444403	0.149528	-2.97204	0.00295832	0.101752	ENSMUSG00000035227	366.742	309.176	337.126	483.269	539.685	339.69	558.487	439.621	430.21	12752	8572	7127	13436	10685	13098	17911	9228	13267	9904.4	8819.11	9309.72	13383	14576.8	9220.74	14510.5	12530	12078.4
Picalm	2080.68	0.921701	0.309583	2.97723	0.00290864	0.101752	ENSMUSG00000039361	29.0405	86.0435	29.9943	23.848	26.8018	38.3072	23.8285	20.2412	23.9405	2349	4371	1343	1610	1259	3060	1853	1007	1694	1756.93	5498.13	1855.51	1479.45	1621.68	2329.41	1386.91	1292.39	1505.72
Mfsd4a	484.728	0.51606	0.173632	2.97214	0.00295733	0.101752	ENSMUSG00000059149	15.4157	15.5916	14.4024	9.83887	9.55486	12.6475	8.97382	12.8523	10.2775	803	659	391	405	274	651	387	410	505	601.302	642.344	574.436	393.526	372.741	495.847	336.75	528.853	416.753
Tnip2	1130.44	-0.577423	0.194219	-2.97304	0.00294862	0.101752	ENSMUSG00000059866	26.5324	30.8138	20.202	44.0258	50.6382	31.7208	44.242	32.8277	32.1273	1103	1056	482	1502	1173	1327	1600	864	1239	848.826	1041.2	660.864	1444.27	1620.22	1020	1361.69	1108.38	1068.51
Aurkaip1	3333.76	-0.390305	0.131152	-2.97597	0.00292065	0.101752	ENSMUSG00000065990	174.952	141.875	161.223	199.4	232.315	169.572	235.224	226.126	203.871	3823	2460	2054	3517	2882	4085	4713	2986	4034	2959.32	2534.71	2788.54	3458.58	3930.11	2882.98	3827.86	4036.75	3585.02
Slc2a4rg-ps	454.584	-0.474963	0.159489	-2.97803	0.00290104	0.101752	ENSMUSG00000085028	6.17538	5.38699	6.02136	7.0062	10.1224	8.71424	8.16405	6.79607	8.66978	476	332	258	447	454	735	599	323	604	370.844	341.682	369.742	431.429	607.944	525.984	471.666	430.717	541.25
Ighv1-77	22.6354	2.13211	0.715919	2.97814	0.00290003	0.101752	ENSMUSG00000096452	22.4998	3.61962	4.5198	2.76295	3.65651	2.67546	2.87553	0.288183	1.96969	132	16	16	12	12	17	17	1	10	101.758	17.1396	20.9019	12.3424	16.5391	12.0003	12.5115	1.37552	9.15043
Gm36401	23.3638	1.54968	0.521144	2.97361	0.00294323	0.101752	ENSMUSG00000104342	0.551544	1.39952	1.11113	0.286644	0.202658	0.556496	0.288898	0.417765	0.348145	28	57	32	12	6	31	14	13	16	21.8715	58.6169	45.0544	11.6557	8.03738	22.1807	11.0216	17.4838	14.3523
Gadd45a	91.9238	1.26567	0.426418	2.96816	0.00299593	0.102567	ENSMUSG00000036390	3.1906	12.6873	4.23869	2.70999	2.3664	2.62961	2.74806	2.46624	4.17663	88	281	66	63	39	82	70	40	107	68.912	289.426	93.6116	60.0485	51.1168	57.0858	57.1168	56.2165	93.78
Atp13a3	3107.9	0.47731	0.160993	2.96478	0.00302901	0.103199	ENSMUSG00000022533	27.6505	30.8131	23.8281	21.4237	15.4326	25.0317	20.8019	17.9538	19.1564	4774	3906	2538	3215	1577	4792	3501	1853	2971	3754.48	4419.06	3308.35	2982.91	2095.75	3416.26	2717.38	2572.82	2704.1
Trim34a	124.994	1.10895	0.374034	2.96485	0.00302829	0.103199	ENSMUSG00000056144	3.1015	3.25567	4.665	0.853287	0.853492	2.75785	2.24053	1.96743	1.62405	205	173	175	47	33	200	141	80	98	160.224	177.971	247.195	45.4413	44.1602	143.632	111.512	107.111	87.7023
Col27a1	28.105	2.26316	0.763791	2.96306	0.00304598	0.103432	ENSMUSG00000045672	0.167675	1.28029	0.277686	0.070143	0.126837	0.153578	0.066774	0.031305	0.308697	33	77	9	12	14	19	9	4	20	16.4696	132.822	27.8898	7.06481	12.4599	15.1621	6.30982	3.24518	31.5219
Ulbp1	112.424	1.0645	0.359311	2.9626	0.00305052	0.103432	ENSMUSG00000079685	1.6008	3.04906	1.10971	0.609627	0.75423	0.9086	1.46162	0.907452	0.969445	161	248	100	49	32	134	122	89	108	139.38	280.398	98.7979	54.4284	65.6779	79.5151	122.432	83.4342	87.7499
Ap2m1	15457.8	-0.449617	0.152005	-2.95791	0.00309735	0.104321	ENSMUSG00000022841	429.122	402.937	430.912	589.107	744.827	445.217	676.432	515.245	526.264	16139	12088	8975	17180	15415	18425	23031	12156	17782	12351.4	12249.3	12682	17386.8	21440.8	12880.2	18731.5	15651.4	15746.9
Myo1f	16.4569	2.14103	0.724269	2.95612	0.00311534	0.104321	ENSMUSG00000024300	0.605083	0.300127	0.372087	0.012533	0.153847	0.054702	0.043703	0.161837	0.163912	61	24	21	1	9	6	4	10	15	46.9831	24.6139	29.5425	0.997871	11.9473	4.26918	3.26464	13.2621	13.2313
Nusap1	51.034	1.20509	0.407258	2.95903	0.00308612	0.104321	ENSMUSG00000027306	0.828303	2.07715	0.750054	0.542936	0.511727	0.628938	0.657054	0.397612	0.509907	65	138	35	37	25	61	50	21	39	53.8255	142.565	49.8388	36.1879	33.2576	40.7946	41.0771	27.2687	34.49
Zfp362	666.515	0.635872	0.215198	2.95482	0.00312851	0.104321	ENSMUSG00000028799	17.4463	14.788	14.2426	9.64857	7.74128	8.56939	8.25242	12.4537	13.4883	1178	814	576	552	319	673	559	553	878	960.277	859.708	801.605	544.572	426.147	474.087	436.994	723.433	771.815
Grpel1	5601.47	-0.309107	0.104556	-2.95639	0.00311263	0.104321	ENSMUSG00000029198	72.6889	56.5815	66.5231	86.4543	87.4974	75.376	86.1504	76.5545	78.1601	6717	4212	3472	6620	4731	7643	7570	4370	6554	5255.35	4320.79	4917.31	6408.91	6327.05	5477.11	5991.55	5841.1	5874.07
Gng2	163.259	0.9296	0.314527	2.95555	0.0031211	0.104321	ENSMUSG00000043004	2.51418	4.20643	3.64807	1.56623	0.874252	1.73531	2.5049	1.96568	2.31098	245	155	196	131	52	118	240	122	203	169.787	298.823	250.918	108.49	59.4998	117.911	162.638	139.457	161.808
Svip	32.8278	1.76133	0.596028	2.95512	0.00312552	0.104321	ENSMUSG00000074093	0.530185	0.618453	2.48388	0.22872	0.474961	0.149546	0.384647	0.327464	0.536464	42	31	39	15	22	13	29	16	22	26.7471	32.9537	128.132	11.8318	23.9641	7.58297	18.6687	17.4349	28.1353
Oas1c	28.5362	1.45339	0.492342	2.95199	0.00315732	0.104402	ENSMUSG00000001166	1.74608	1.24361	0.878844	0.229408	0.616024	0.659161	0.704342	0.392482	0.285156	43	58	21	11	12	42	39	14	15	65.3666	49.1726	33.6418	8.80638	23.0644	24.8026	25.3674	15.5066	11.0978
Kansl1	2611.21	0.397127	0.134474	2.9532	0.00314502	0.104402	ENSMUSG00000018412	25.1948	31.9595	27.6125	19.9146	20.4835	26.1474	22.4828	19.9247	21.6459	3434	3530	2087	2252	1645	3887	2939	1711	2723	2697.08	3613.52	3022.49	2186.01	2193.01	2813.36	2315.44	2251.03	2408.91
Ngdn	4361.16	-0.393511	0.133268	-2.95279	0.00314919	0.104402	ENSMUSG00000022204	183.246	160.498	160.061	226.226	260.001	176.667	246.158	227.392	202.95	4924	3392	2524	5021	4012	5124	6344	3671	5003	3838.46	3550.92	3428.33	4859.18	5446.91	3719.57	4960.62	5026.94	4419.51
Ighm	50521.3	0.349658	0.118461	2.95168	0.00316054	0.104402	ENSMUSG00000076617	1851.61	1662.7	1958.32	1278.39	1361.42	1563.28	1374.59	1469	1624.46	74517	53107	44950	42576	32024	69625	53407	36369	59569	58403.3	55392.1	63160.9	41347.6	42947.1	49560.8	41712.2	48900.7	53266.9
Tut7	2163.46	0.59517	0.201732	2.95029	0.00317471	0.104505	ENSMUSG00000035248	36.87	63.7248	37.1432	24.1836	34.751	36.418	30.3571	30.6142	29.3702	2768	3730	1563	1613	1434	2934	2236	1467	2047	2173.15	3966.74	2237.95	1461.82	2048.49	2157.38	1721.27	1904.75	1799.62
Mpeg1	34.2838	1.68094	0.569825	2.94993	0.00317849	0.104505	ENSMUSG00000046805	0.653455	0.961664	0.432315	0.388553	0.148794	0.127032	0.064188	0.225245	0.335825	75	89	28	37	10	16	7	16	35	58.7021	91.245	39.7114	35.7921	13.3684	11.4701	5.54746	21.355	31.3627
Dnajc13	3178.94	0.861171	0.292028	2.94894	0.00318868	0.104596	ENSMUSG00000032560	25.1223	62.1066	26.9092	17.4548	16.511	34.5993	20.977	19.8211	19.0904	4238	5891	2204	2164	1457	5439	2783	2001	2654	2893.9	7556.28	3169.57	2061.82	1902.17	4006.06	2324.7	2409.68	2286.24
Kmt2a	3415.54	0.446573	0.151561	2.94649	0.00321408	0.104941	ENSMUSG00000002028	13.0257	10.1507	13.2186	7.95559	7.94556	11.4967	8.54776	8.31293	9.62568	4965	3707	3031	2990	1837	5343	3653	2336	3820	4355.81	3585.17	4519.89	2727.89	2656.9	3864.24	2749.92	2933.78	3346.26
Ube2i	13988.8	-0.331232	0.112398	-2.94695	0.00320926	0.104941	ENSMUSG00000015120	643.939	606.863	636.012	864.874	921.743	693.276	799.202	776.166	746.744	15509	11412	8945	16474	12468	18446	18582	10854	15692	11913.2	11858.2	12031.8	16407.6	17055.2	12891.5	14224.8	15154.7	14361.8
Ssh2	1007.49	0.612012	0.207817	2.94495	0.00323002	0.104976	ENSMUSG00000037926	7.51583	9.4324	8.66387	4.79569	3.93982	7.8472	5.99797	4.84582	6.5282	1454	1405	1046	753	426	1505	1056	612	1119	1121.72	1486.89	1322.2	733.937	588.082	1177.17	861.22	763.278	1012.89
Timd2	34.4672	1.47681	0.501389	2.94543	0.00322505	0.104976	ENSMUSG00000040413	1.081	1.54177	1.29576	0.38563	0.484876	0.51578	0.129808	0.54726	0.772692	65	70	43	18	16	32	7	19	40	48.2071	72.832	59.2592	17.6858	21.6891	23.1866	5.58548	25.8319	35.9273
B4galt1	2951.64	0.320649	0.108946	2.94318	0.00324864	0.10506	ENSMUSG00000028413	43.5269	38.3388	39.3916	34.4421	29.764	35.5457	31.1626	33.6986	31.4783	4569	3240	2333	3000	1830	4097	3111	2189	2996	3575.6	3326.42	3308.8	2901.21	2445.32	2934.9	2462.78	2921.53	2688.22
Tmem234	3338.25	-0.345683	0.117449	-2.94326	0.0032478	0.10506	ENSMUSG00000028797	129.253	128.448	129.936	159.58	198.314	143.381	177.341	163.327	155.958	3625	2661	2080	3613	3052	4292	4711	2795	3787	2755.84	2892.56	2833.02	3489.4	4229.23	3072.99	3637.9	3676.09	3457.19
St8sia4	1212.27	0.644055	0.218875	2.94257	0.00325495	0.10506	ENSMUSG00000040710	11.4168	10.2379	16.3193	7.535	7.41579	11.3955	9.2951	5.18007	8.38172	1718	1360	1371	963	721	2032	1406	503	1169	1405.3	1331.03	2054.02	951.061	912.928	1409.86	1100.73	672.928	1072.56
Ccdc130	752.008	-0.522014	0.177615	-2.93901	0.0032926	0.10555	ENSMUSG00000004994	30.7119	26.6027	27.7042	42.9585	53.9807	33.0351	44.0125	30.8739	42.7379	763	516	443	911	760	1023	1082	539	856	615.454	563.069	567.688	882.747	1081.88	665.394	848.526	652.959	890.355
Ypel2	17.161	2.21553	0.753668	2.93967	0.00328566	0.10555	ENSMUSG00000018427	0.100764	0.845806	0.192389	0.102712	0.145558	0.042379	0.089771	0.075081	0.042668	13	35	14	11	11	6	11	6	5	9.18557	81.4361	17.9331	9.60103	13.2705	3.88298	7.87291	7.22331	4.0436
Phf20l1	2903.89	0.393199	0.133762	2.93954	0.00328701	0.10555	ENSMUSG00000072501	31.4066	36.7306	34.6731	29.6989	27.7809	25.0299	31.1984	21.4468	23.8513	4042	3277	2384	3122	2106	3434	3664	1739	2861	3080.01	3804.59	3476.97	2986.56	2724.78	2467.21	2943.51	2219.74	2431.67
Mfsd5	3592.69	-0.359084	0.122285	-2.93646	0.00331983	0.106182	ENSMUSG00000045665	95.7112	79.8642	87.0509	117.5	131.668	96.2859	116.189	115.487	103.881	4131	2761	2135	4174	3310	4560	4794	3046	4055	3224.76	2842.07	2999.05	4059.5	4436.8	3260.71	3766.19	4106.54	3638.6
Mturn	19.2069	2.8394	0.967492	2.93481	0.00333754	0.106266	ENSMUSG00000038065	0.04941	0.927199	0.187778	0.0085	0	0.064321	0.111511	0.079721	0.069928	7	106	15	1	0	10	15	7	9	5.48141	108.642	21.3008	0.96692	0	7.17204	11.9013	9.33367	8.06472
1300014J16Rik	94.2588	1.77566	0.605024	2.93486	0.003337	0.106266	ENSMUSG00000112545	2.53274	16.8647	1.38722	1.43001	2.18108	3.05863	3.06902	1.6182	1.2632	80	425	25	37	40	106	93	31	36	62.3517	438.515	34.9203	36.0991	53.701	75.6831	72.6873	42.0432	32.329
Pls1	55.7489	1.55155	0.529007	2.93294	0.00335766	0.106666	ENSMUSG00000049493	0.596171	2.01554	1.18308	0.161197	0.263461	0.814905	0.52973	0.282726	0.577553	58	158	65	13	15	87	49	17	51	45.3834	162.056	92.0912	12.5829	20.0584	62.3517	38.7955	22.7143	45.7067
Gm48551	128.221	-0.610945	0.208359	-2.93218	0.00336594	0.106689	ENSMUSG00000113262	3.01052	2.5631	2.93871	4.10124	4.48069	4.07938	5.53971	4.28093	3.83282	122	86	72	146	107	194	204	113	145	98.4845	88.3151	97.7253	137.194	146.33	134.037	174.279	147.19	130.43
Tbc1d2b	42.2917	1.90403	0.650143	2.92863	0.00340457	0.107672	ENSMUSG00000037410	1.58384	0.48706	0.344384	0.09039	0.413175	0.102644	0.293713	0.060539	0.33746	73	58	28	12	29	18	37	6	49	160.47	52.1211	35.6781	9.39076	41.8669	10.4528	28.629	6.47327	35.5441
Jade2	1090.37	0.452394	0.154614	2.92595	0.00343404	0.107878	ENSMUSG00000020387	9.43002	9.95957	10.5039	7.27542	6.6561	9.07858	6.04383	7.45109	7.60439	1567	1343	979	1006	655	1638	947	771	1136	1225.44	1366.99	1395.74	969.472	865.071	1185.8	755.598	1021.89	1027.32
Atm	1117.15	0.651342	0.222551	2.92671	0.00342568	0.107878	ENSMUSG00000034218	10.9178	13.8935	7.56536	6.97846	7.69984	9.54848	6.92136	5.72843	5.03757	1787	1102	961	852	659	1859	1278	681	1031	1449.63	1948.43	1027.14	950.127	1022.49	1274.3	884.129	802.723	695.355
Syne3	30.5029	1.71037	0.584496	2.92623	0.00343101	0.107878	ENSMUSG00000054150	0.565137	0.835838	0.440997	0.058065	0.039004	0.240416	0.289152	0.249285	0.250157	68	74	25	6	2	30	36	21	28	51.0276	79.7116	40.7159	5.3761	3.52222	21.8187	25.1176	23.7549	23.4816
Cdc42bpb	24.4775	1.87558	0.641808	2.92234	0.00347413	0.108413	ENSMUSG00000021279	0.246424	0.471539	1.32566	0.152364	0.27516	0.147379	0.311063	0.071282	0.127773	33	44	18	11	7	12	28	8	21	17.1581	34.2987	93.4832	10.7748	19.4188	9.95384	20.8611	5.18814	9.16067
Mettl6	2164.63	-0.411282	0.140725	-2.92258	0.00347141	0.108413	ENSMUSG00000021891	59.876	56.7146	47.4837	75.6682	84.3968	71.7447	86.1566	56.8409	68.285	2327	1996	1218	2469	1852	3349	3082	1468	2334	1892.9	1893.4	1535.07	2452.57	2668.59	2279.34	2620	1896.22	2243.57
Gm26759	968.129	-0.420061	0.143679	-2.92361	0.00345999	0.108413	ENSMUSG00000097060	37.5276	27.5611	36.7698	46.7354	44.0215	38.331	52.5328	45.0703	48.3457	1096	641	613	1116	746	1228	1473	796	1273	853.805	661.861	854.774	1089.88	1002	876.376	1149.47	1081.53	1143.46
Skap1	11.7406	2.93434	1.00448	2.92124	0.0034864	0.108555	ENSMUSG00000057058	0.521276	1.54992	0.990517	0.369032	0	0	0.061321	0.227166	0.151153	17	46	18	11	0	0	2	5	4	13.7516	43.1857	26.7192	9.98268	0	0	1.55631	6.3246	4.14541
Dennd5a	3438.89	0.446423	0.15291	2.9195	0.00350589	0.108922	ENSMUSG00000035901	55.9685	78.2258	61.5966	51.6275	51.9198	48.9922	45.4988	53.2387	40.2725	4422	5078	2499	3422	2463	4162	3585	2588	3102	3481.79	5139.92	3918.25	3293.36	3230.32	3063.38	2723.07	3495.37	2604.53
Fto	3651.69	-0.351319	0.120375	-2.91854	0.00351672	0.109018	ENSMUSG00000055932	40.5249	38.3555	37.8353	48.5117	62.2878	48.7871	53.046	43.1907	46.0479	3965	3111	2073	4024	3603	5419	4954	2604	4076	3131.67	3130.65	2989.73	3844.17	4813.76	3789.47	3943.83	3522.51	3699.45
Git1	2623.16	-0.453388	0.155399	-2.91757	0.00352772	0.109119	ENSMUSG00000011877	32.2893	32.1131	24.9216	44.5237	47.8587	41.4537	46.2819	37.8802	30.358	2850	2160	1228	3329	2505	3927	3906	2068	2479	2222.84	2334.96	1754.29	3142.97	3295.07	2868.33	3065.22	2752.13	2172.63
Vti1b	3640.67	-0.383658	0.131544	-2.91657	0.00353902	0.109186	ENSMUSG00000021124	132.854	115.491	132.629	170.261	202.262	138.981	173.628	170.661	149.451	3954	2804	2160	4142	3547	4537	4893	3186	4037	3088.31	2835.6	3152.55	4058.47	4702.3	3247.29	3883.03	4186.84	3611.68
L3mbtl2	2748.1	-0.403794	0.138507	-2.91533	0.0035531	0.109186	ENSMUSG00000022394	34.7534	28.1505	32.8672	42.4457	53.1371	35.9447	47.5807	39.0449	38.3464	3066	2013	1707	3093	2738	3370	4024	2123	3066	2402.97	2055.3	2323.66	3008.55	3674.46	2497.46	3165.02	2849.19	2756.31
Fbxo31	1240.93	-0.565545	0.193989	-2.91535	0.00355295	0.109186	ENSMUSG00000052934	15.4226	10.2401	16.1831	21.0561	28.1938	16.7431	23.7839	18.4579	17.022	1355	778	852	1483	1188	1418	1866	923	1354	1016.44	712.81	1090.58	1422.98	1858.36	1109.11	1508.01	1283.84	1166.26
Rab1a	2959.29	0.521396	0.179199	2.9096	0.00361888	0.109639	ENSMUSG00000020149	77.4879	121.431	79.7948	73.5386	52.1803	63.2854	71.0381	67.3949	66.9863	3923	4315	2221	2951	1624	3625	3367	2030	3019	3001.23	4967.53	3160.21	2920.65	2021.27	2463.68	2647.02	2754.86	2697.2
Vwa5a	56.9403	1.55295	0.53346	2.91109	0.00360171	0.109639	ENSMUSG00000023186	0.804804	1.43374	1.72444	0.373042	0.124377	0.290311	0.430909	1.03966	0.463004	80	77	94	29	8	35	38	65	40	59.9967	112.89	131.45	28.5163	9.27319	21.7528	30.9046	81.7965	35.8826
Gtf2h3	4093.57	-0.419106	0.144	-2.91046	0.00360903	0.109639	ENSMUSG00000029387	72.9043	60.5508	71.7904	91.9755	114.909	76.7549	105.423	89.2707	77.3688	4495	2851	2653	4602	3905	5294	5710	3506	4325	3475.97	3049.23	3499.98	4496.7	5479.38	3678.28	4835.68	4491.99	3834.87
Tspan3	1276.03	-0.326286	0.112085	-2.91106	0.003602	0.109639	ENSMUSG00000032324	33.4604	28.5907	35.1395	39.2623	46.7313	40.9684	42.0258	39.4202	37.9796	1410	966	841	1361	1146	1893	1692	1014	1446	1100.17	992.891	1181.41	1323.74	1536.7	1353.92	1329.37	1367.9	1298.2
Bbs9	40.2839	1.21755	0.418183	2.91152	0.0035967	0.109639	ENSMUSG00000035919	1.22657	0.576207	1.46827	0.370682	0.711321	0.539189	0.513325	0.380523	0.320853	61	41	58	25	28	51	42	16	25	71.7375	35.5944	87.8088	22.2308	41.6077	31.6965	28.8834	23.4878	19.5085
Ccdc84	912.778	-0.423618	0.145632	-2.90883	0.00362783	0.109639	ENSMUSG00000043923	39.475	36.9296	32.1943	49.596	60.2568	41.3933	48.8214	49.3264	46.0215	1021	857	475	945	885	1202	1272	753	962	789.498	779.315	657.607	1016.34	1204.72	831.891	938.639	1040.7	956.296
E2f6	1895.81	-0.493499	0.169706	-2.90797	0.00363781	0.109639	ENSMUSG00000057469	33.9509	28.1862	31.7295	44.0272	44.8649	61.4928	45.1999	38.2583	33.6872	2051	1367	1078	2131	1530	4063	2538	1356	1865	1578.98	1384.55	1508.91	2099.63	2086.81	2874.5	2022.38	1877.83	1628.73
Msto1	1837.52	-0.341231	0.117339	-2.90808	0.00363656	0.109639	ENSMUSG00000068922	42.8987	37.1641	37.3652	50.8605	58.1705	53.5904	48.5695	44.0962	45.93	2121	1513	1052	2077	1706	2939	2285	1336	2056	1667.09	1526.01	1484.6	2026.42	2260.78	2093.08	1816.01	1808.38	1855.33
Gm5537	27.178	-7.72755	2.65713	-2.90823	0.00363479	0.109639	ENSMUSG00000069008	0	0	0	4.62908	2.50478	2.69089	0.8082	0	0	0	0	0	111	42	86	23	0	0	0	0	0	108.607	56.5199	61.492	17.9828	0	0
Chpt1	535.824	-0.437563	0.150535	-2.90672	0.00365244	0.109846	ENSMUSG00000060002	10.6137	11.1747	13.6642	17.076	16.4476	14.0152	18.5894	14.1075	16.7576	632	383	408	567	437	590	849	366	713	380.362	422.688	500.547	627.236	589.103	504.563	640.475	533.428	624.013
Syk	1104.57	0.691112	0.238037	2.90338	0.00369154	0.11055	ENSMUSG00000021457	12.8104	13.3571	15.8459	6.65124	6.33169	7.44556	8.77795	9.32499	13.9095	1673	1445	1176	704	477	1079	1087	781	1699	1319.64	1453.29	1669.11	702.576	652.326	770.911	869.934	1013.79	1489.59
Dmac2l	524.266	-0.41973	0.144552	-2.90367	0.00368817	0.11055	ENSMUSG00000054894	23.3779	17.2339	19.0072	25.5769	31.3943	25.3002	29.7829	24.8377	24.7045	613	409	301	582	494	735	738	398	568	491.081	382.366	408.265	550.928	659.557	534.18	601.887	550.637	539.493
Ndufa12	8996.43	-0.391118	0.135193	-2.89304	0.00381528	0.11164	ENSMUSG00000020022	940.57	782.266	830.548	1136.78	1294.82	898.707	1086.43	1225.64	1116.15	10356	6686	5445	10025	8123	10862	11721	7917	11043	8033.74	7057.67	7253.97	9957.09	11061.2	7715.71	8928.02	11049.3	9911.15
Retreg1	697.03	0.392444	0.135592	2.89431	0.00379991	0.11164	ENSMUSG00000022270	13.003	15.8718	13.3718	11.2752	10.0297	10.6962	12.2046	9.69989	11.3726	893	994	567	685	455	784	806	458	768	744.368	959.659	782.723	661.862	574.228	615.441	672.152	586.025	676.809
Wsb2	1509.58	-0.426553	0.147448	-2.89291	0.00381691	0.11164	ENSMUSG00000029364	24.1671	25.8957	22.7498	34.4881	37.3597	27.1389	40.7746	27.5545	31.5466	1500	1330	812	1802	1383	1921	2461	1055	1754	1190.33	1347.15	1145.56	1741.7	1839.3	1343.03	1931.72	1432.5	1614.9
Ccng2	384.273	0.985044	0.340031	2.89692	0.00376843	0.11164	ENSMUSG00000029385	6.28467	16.4418	7.64267	3.1856	3.54827	4.46726	6.44347	6.22661	7.42244	446	979	291	189	141	338	435	257	476	343.6	949.44	427.259	178.592	194.017	245.486	338.915	359.276	421.87
Calu	2615.34	0.321898	0.111278	2.89275	0.00381888	0.11164	ENSMUSG00000029767	49.4108	47.2055	44.5215	41.8928	33.0271	40.3792	39.0884	36.5942	37.349	3968	3020	2012	2769	1532	3523	3001	1791	2749	3089.64	3117.3	2846.64	2686.41	2065.45	2537.98	2351.8	2414.95	2427.91
Dusp16	502.245	0.935345	0.323173	2.89426	0.00380059	0.11164	ENSMUSG00000030203	4.92254	15.3746	5.30418	4.37303	4.83014	6.13546	4.03198	4.1322	3.92136	549	1246	306	376	295	708	394	289	404	409.15	1349.72	450.803	372.712	401.519	512.572	322.412	362.477	338.838
Cenpi	69.8345	0.999943	0.34529	2.89595	0.00378011	0.11164	ENSMUSG00000031262	1.2202	1.68314	2.08416	0.799121	1.34047	0.867394	0.539769	0.849958	0.655723	101	100	99	53	64	80	30	42	50	74.7554	108.912	130.562	50.202	82.1332	53.4123	31.814	54.9558	41.7631
Ubn1	1055.4	0.549342	0.189925	2.89242	0.0038229	0.11164	ENSMUSG00000039473	11.1306	14.8968	9.17282	7.61007	6.52812	10.0332	8.44264	8.81314	7.37547	1676	1466	770	886	513	1589	1138	794	994	1232.91	1742.83	1038.95	864.375	723.196	1117.05	899.692	1030.27	849.311
Kcnj10	3.90536	3.77123	1.30342	2.89333	0.00381176	0.11164	ENSMUSG00000044708	0.055341	0.111435	0.098155	0.00833	0	0.012607	0	0	0.015229	8	13	8	1	0	2	0	0	2	6.26556	13.3254	11.3632	0.967013	0	1.43466	0	0	1.7924
Gpr183	2132.73	-0.436989	0.151047	-2.89307	0.00381494	0.11164	ENSMUSG00000051212	36.256	23.1512	33.8978	42.1309	45.3836	46.1931	46.2182	33.5454	41.6142	2527	1305	1301	2427	1844	3524	3085	1448	2585	1968.55	1327.66	1881.97	2345.67	2464.44	2520.92	2414.23	1922.23	2348.93
Ipcef1	42.863	1.75204	0.605729	2.89244	0.00382256	0.11164	ENSMUSG00000064065	0.58666	0.772527	0.615963	0.02969	0.063131	0.376506	0.201418	0.208787	0.298609	72	82	53	4	6	67	31	21	44	70.0877	97.4802	75.2464	3.63718	7.54315	45.2108	23.1502	26.3247	37.0868
Selenot	2645.46	0.328642	0.113578	2.89353	0.00380942	0.11164	ENSMUSG00000075700	46.0527	45.7358	51.5842	33.0284	36.2329	40.7502	42.06	37.7801	41.1049	3716	2672	2372	2220	1685	3625	3233	1862	3057	2876.1	3016.84	3294.13	2115.12	2263.11	2557.96	2527.07	2490.11	2668.72
Rapgef5	362.626	0.38823	0.134257	2.89169	0.00383178	0.111668	ENSMUSG00000041992	4.10096	4.24302	4.0816	3.07391	3.42133	2.91492	3.44869	3.06585	3.32123	509	386	323	354	235	438	415	262	396	414.805	453.296	422.148	318.822	346.105	296.347	335.594	327.278	349.237
Myo5a	2935.58	0.336393	0.116366	2.89082	0.00384235	0.111745	ENSMUSG00000034593	34.5166	36.9733	35.7183	26.4804	27.6292	34.3891	28.2828	26.652	28.4814	4515	3177	2441	2592	1904	4578	3246	1929	3011	3206.66	3627.94	3393.06	2522.59	2567.11	3211.15	2527.83	2613.13	2750.73
Srp9	5075.54	-0.324588	0.112313	-2.89002	0.0038522	0.111801	ENSMUSG00000026511	206.245	169.371	190.977	249.143	254.082	203.426	264.572	239.356	224.056	6023	3923	3066	5900	4297	6446	7126	4135	5953	4630.68	4016.62	4384.49	5735.96	5705.48	4590.37	5714.97	5671.65	5229.67
Txnl4b	548.414	-0.48244	0.166971	-2.88936	0.00386031	0.111806	ENSMUSG00000031723	11.5518	10.9242	12.6468	16.7237	22.1155	14.4685	16.21	15.7113	14.1698	532	406	337	641	605	713	722	435	596	416.977	416.486	466.785	619.003	798.382	524.928	562.917	598.521	531.725
Ncapg	95.3064	1.01069	0.349954	2.88807	0.00387616	0.111957	ENSMUSG00000015880	2.03145	2.74288	2.98217	0.65346	1.49134	1.49195	0.988993	1.19476	2.00876	90	184	91	48	78	154	72	48	85	109.243	155.727	164.459	36.0294	80.3268	80.526	51.3422	68.0309	112.073
9930111J21Rik1	63.5962	1.38067	0.478132	2.88764	0.00388139	0.111957	ENSMUSG00000069893	1.50605	2.51105	0.707153	0.215574	0.585713	0.912483	0.66396	0.538787	0.80098	145	184	38	18	26	67	57	25	55	99.9631	175.847	47.5994	14.5033	38.719	60.8188	41.9811	37.395	55.5388
Med28	6056.55	-0.293039	0.101542	-2.88589	0.00390306	0.112352	ENSMUSG00000015804	313.54	289.204	338.85	400.32	395.826	344.718	418.183	399.635	373.876	6576	4953	3898	6954	4813	8087	8121	5204	7138	5130.68	4998.44	5669.77	6717.18	6477.98	5669.7	6583.38	6901.63	6360.21
Med13	2957.46	0.491106	0.170219	2.88515	0.0039123	0.112389	ENSMUSG00000034297	14.155	21.283	16.7463	11.0803	10.3354	13.6162	13.8893	11.8029	14.6732	3959	4586	2707	2601	1395	4143	2903	1910	3382	2893.59	4594.74	3499.98	2322.75	2112.94	2797.48	2730.95	2546.83	3117.87
Usp45	592.571	0.528691	0.183354	2.88344	0.00393356	0.11277	ENSMUSG00000040455	7.26702	7.06818	9.96166	7.08664	5.22108	5.9527	5.06761	5.9431	4.70103	882	572	646	635	348	773	501	455	558	652.185	669.992	914.161	652.159	468.628	536.963	437.541	562.904	438.601
Mrps27	2747.55	-0.429058	0.148889	-2.88174	0.00395488	0.113151	ENSMUSG00000041632	71.1102	51.1002	77.1736	94.043	104.633	76.7145	97.7134	87.8786	81.1382	2960	1696	1867	3282	2503	3663	3959	2220	3095	2334.3	1771.75	2590.47	3165.66	3435.18	2531.17	3085.87	3044.51	2769.04
Zscan18	71.2483	-0.894135	0.310521	-2.87947	0.0039835	0.11374	ENSMUSG00000070822	0.971082	0.637843	0.82204	1.90889	1.75685	1.33328	1.60991	1.62204	0.980402	83	30	35	105	79	86	101	74	60	52.682	36.5484	45.6012	106.191	95.3224	72.7013	84.0251	92.87	55.2933
Nudc	11246.5	-0.341716	0.118732	-2.87804	0.00400153	0.114023	ENSMUSG00000028851	415.461	329.809	418.151	528.597	519.97	423.178	500.392	507.114	496.011	12848	8133	7315	13356	9338	14269	14834	9491	13784	9985.94	8372.99	10277.4	13028.6	12499.7	10223.9	11571.4	12864.4	12394.3
Fbxo33	461.214	0.790935	0.274941	2.87675	0.00401795	0.11426	ENSMUSG00000035329	6.99099	12.1928	7.43866	4.62701	3.61215	8.44223	5.24031	5.27436	4.11611	648	893	380	355	196	772	452	262	350	490.147	902.9	533.283	332.649	253.283	594.921	353.464	390.268	300.01
Stub1	5712.78	-0.353494	0.122911	-2.87602	0.00402721	0.114293	ENSMUSG00000039615	188.957	153.973	183.535	226.701	261.685	189.308	250.763	220.877	211	6430	4357	3485	6390	5252	7233	8136	4680	6541	5066.75	4360.48	5032.84	6233.68	7017.71	5102.42	6468.66	6251.04	5881.49
S100a13	47.752	1.08668	0.378063	2.87434	0.00404876	0.114674	ENSMUSG00000042312	5.44495	6.14415	7.81144	2.69896	3.9018	1.46357	3.58131	3.32915	3.59697	78	69	65	31	32	23	50	28	46	60.3716	71.9528	88.5616	30.6855	43.267	16.3105	38.2016	38.9564	41.4608
BC005624	2960.98	-0.333865	0.116222	-2.87266	0.00407036	0.114808	ENSMUSG00000026851	72.0245	63.8697	70.3305	91.4519	95.392	72.0617	93.2688	87.4898	85.9998	3340	2272	1849	3483	2578	3589	4019	2457	3624	2578.15	2414.72	2574.31	3356.71	3414.91	2592.64	3211.89	3305.19	3200.27
Pyurf	1807.62	-0.259312	0.0902705	-2.87261	0.004071	0.114808	ENSMUSG00000043162	21.8103	19.9734	22.0224	24.7343	26.2829	26.7532	27.6115	25.4679	23.6738	2043	1507	1165	1920	1440	2749	2459	1474	2012	1598.48	1545.86	1650.12	1858.68	1925.75	1970.03	1946.43	1970.01	1803.25
Gmfg	132.313	0.828238	0.288377	2.87207	0.0040779	0.114808	ENSMUSG00000060791	16.4617	23.1526	14.0165	10.1843	7.44447	7.74538	13.5517	13.5598	9.02118	211	230	112	102	63	105	164	103	110	166.623	247.518	145.07	105.704	75.361	78.7985	131.964	144.85	94.926
Lmnb1	512.662	0.535767	0.186599	2.87123	0.00408883	0.114886	ENSMUSG00000024590	13.1628	10.0097	10.3201	6.59535	8.95199	5.7368	8.11675	8.8225	8.50494	966	591	408	391	384	462	526	399	566	743.076	596.834	595.722	381.788	505.426	325.514	440.827	525.634	499.135
Xab2	3121.32	-0.312277	0.108899	-2.86759	0.00413613	0.115984	ENSMUSG00000019470	53.3891	45.9981	46.8246	63.7043	70.4409	57.2618	63.7967	57.4987	54.85	3661	2548	1832	3615	2833	4369	4114	2444	3425	2871.67	2613.33	2575.91	3513.58	3789.31	3095.61	3301.18	3264.24	3067.06
Knl1	34.167	1.61603	0.563703	2.86681	0.00414634	0.11604	ENSMUSG00000027326	0.390708	0.852517	0.839054	0.506054	0.18353	0.120932	0.109577	0.282364	0.151205	44	107	45	41	5	28	4	35	29	33.9991	78.3551	74.6591	45.1556	15.9726	10.5772	9.1735	25.9318	13.6787
Fam214a	191.127	1.13302	0.395362	2.86577	0.00415993	0.11619	ENSMUSG00000034858	5.76078	8.21755	8.75004	4.10252	4.53564	1.31092	2.9174	2.15835	6.06375	284	312	177	105	72	125	188	105	279	221.012	332.985	343.258	161.393	174.031	50.5505	107.679	87.3901	241.846
Rictor	1041.95	0.700865	0.244821	2.86276	0.00419968	0.117068	ENSMUSG00000050310	6.88585	11.525	6.68741	5.35182	3.76436	7.92155	5.35767	4.35022	4.68874	1459	1882	802	935	433	1808	999	583	912	1118.5	1977.27	1110.74	891.414	611.538	1293.32	837.252	745.757	791.768
Rnf166	1370.84	-0.425003	0.148584	-2.86036	0.00423157	0.117262	ENSMUSG00000014470	37.7349	25.913	32.2263	43.7361	51.2395	36.3619	42.2158	42.2468	44.0081	1630	909	801	1583	1303	1736	1774	1126	1746	1287.31	933.697	1124.16	1529.96	1748.23	1246.82	1385.53	1521.04	1560.76
Vezf1	1877.5	0.386974	0.135256	2.86105	0.00422244	0.117262	ENSMUSG00000018377	22.0142	25.7967	22.9144	19.7287	16.5278	16.262	22.6182	17.3203	17.3181	2600	2476	1463	1904	1151	2096	2525	1278	1845	2023.43	2504.35	2153.62	1859.43	1519.33	1502.35	2000.06	1680.14	1654.8
Mrps30	5123.64	-0.504932	0.176508	-2.86068	0.00422731	0.117262	ENSMUSG00000021731	65.4353	46.679	59.9253	91.4173	96.741	58.5799	100.275	78.4409	68.2939	5708	3280	2950	6601	4943	5622	8336	4220	5397	4465.93	3365.15	4182.09	6397.84	6602.84	4018.86	6584.45	5649.59	4845.98
Arfgap1	2395.52	-0.369277	0.129158	-2.8591	0.00424848	0.11727	ENSMUSG00000027575	44.0719	37.4496	38.6781	55.8762	61.8836	43.5399	55.4325	48.5068	49.0237	2744	1974	1407	2763	2223	2933	3292	1889	2747	2151.61	1931.06	1930.83	2797.22	3021.55	2136.5	2603.55	2499.25	2488.11
Gm37795	232.851	0.656399	0.229569	2.85927	0.00424614	0.11727	ENSMUSG00000102813	6.99826	5.81192	5.54583	2.46927	5.07722	3.83526	3.93073	3.60305	4.69678	439	293	197	128	186	264	235	139	267	343.151	300.997	278.059	124.154	248.985	189.018	185.425	186.454	239.418
Cdkn1b	175.599	0.72184	0.252816	2.8552	0.00430101	0.118105	ENSMUSG00000003031	3.45084	5.44654	4.76057	1.99185	2.76241	3.64221	2.41573	3.10623	2.84934	245	305	177	107	99	251	142	125	163	175.349	292.313	247.352	103.785	140.385	186.02	118.094	166.579	150.517
Stx7	1384.84	0.492097	0.172428	2.85393	0.0043182	0.118105	ENSMUSG00000019998	38.7315	32.5549	44.9727	31.0078	28.3977	19.5861	29.2854	27.1271	31.4261	2206	1349	1336	1269	909	1228	1662	1024	1571	1673.49	1485.67	1986.93	1373.81	1227.14	850.589	1217.33	1236.99	1411.6
Esd	4253.9	-0.404893	0.141914	-2.85308	0.00432983	0.118105	ENSMUSG00000021996	240.18	186.386	221.401	275.221	270.923	371.678	264.333	283.012	266.436	4987	3074	2740	4541	3121	7720	5227	3450	4816	3799.47	3114.2	3581.34	4464.42	4286.31	5909.73	4022.94	4724.96	4381.68
Stag2	2797.24	0.384156	0.134694	2.85206	0.00434363	0.118105	ENSMUSG00000025862	26.0394	29.4851	29.5711	18.6729	19.7799	26.7386	23.8287	21.1413	21.9678	3903	3553	2505	2223	1601	4303	3219	1850	2937	2962.26	3542.77	3439.83	2178.25	2250.45	3057.36	2607.92	2538.24	2598.04
Larp7	4483.93	-0.266348	0.0933525	-2.85315	0.00432888	0.118105	ENSMUSG00000027968	103.008	106.573	111.551	130.627	135.019	142.262	128.082	120.953	124.918	4795	3981	2953	5137	3490	6791	5653	3511	5153	3703.83	4047.38	4101.48	4816.12	4855.27	5141.15	4430.8	4589.76	4669.55
Ebna1bp2	15760.3	-0.35837	0.125696	-2.85108	0.00435714	0.118105	ENSMUSG00000028729	498.36	393.719	431.407	629.012	629.646	477.028	626.563	558.188	509.175	18395	11693	9431	19374	13559	20434	21750	13254	17296	14633.1	12210.3	12952.6	18938.8	18490.3	14078.4	17699.4	17297.4	15542.6
Phka1	119.531	0.962978	0.337369	2.85438	0.0043121	0.118105	ENSMUSG00000034055	1.80212	1.16165	1.1265	0.454021	0.675348	0.593765	0.609548	0.6283	1.25989	278	154	100	61	65	107	95	64	188	228.673	155.688	146.163	59.0753	85.7061	75.7287	74.4115	84.1405	166.198
Dennd3	1309.42	0.43312	0.151892	2.8515	0.00435129	0.118105	ENSMUSG00000036661	14.8825	18.0748	18.1846	12.3671	14.9189	14.9962	11.7464	10.3619	12.4137	1783	1759	1027	1238	924	1934	1235	788	1395	1345.16	1725.51	1680.65	1146.21	1348.61	1362.36	1021.41	988.417	1166.43
Dmxl1	2620.7	0.628279	0.220223	2.85292	0.004332	0.118105	ENSMUSG00000037416	12.5002	21.8561	10.8924	9.31804	8.42887	13.0502	10.8089	8.84526	9.24385	3361	4930	1809	2192	1368	3884	2829	1588	2447	2750.99	5080.72	2451.31	2102.87	1855.36	2886.87	2288.51	2054.58	2115.05
Tbl3	4627	-0.276925	0.0971432	-2.85069	0.00436247	0.118105	ENSMUSG00000040688	96.2966	86.5156	88.9113	105.397	126.401	108.235	121.607	102.335	102.911	5446	3721	2711	5134	4355	6531	6210	3619	5137	4203.91	3988.88	3969.59	4718.65	5518.47	4749.21	5108.01	4715.15	4671.15
Gosr2	4231.77	-0.277035	0.0972155	-2.8497	0.00437604	0.118245	ENSMUSG00000020946	66.2667	64.5303	56.2934	80.8409	79.6376	76.5882	79.2136	71.7344	71.1977	5154	3806	2502	4800	3509	6108	5645	3179	4576	3838.91	3948.34	3334.56	4802.12	4613.98	4459.29	4414.73	4386.25	4287.77
Ctdsp2	123.929	1.11139	0.390394	2.84684	0.00441559	0.119086	ENSMUSG00000078429	1.61948	2.32294	2.06961	0.704876	0.711362	0.362562	1.26591	1.04541	1.55014	189	221	131	75	49	51	136	83	162	151.529	229.565	198.009	67.6287	66.5677	34.097	113.952	103.232	150.783
Ccm2	3829.02	-0.48866	0.171894	-2.8428	0.00447192	0.119463	ENSMUSG00000000378	97.4531	82.359	86.8254	130.426	157.053	83.8772	134.485	130.855	119.711	4264	2859	2129	4589	3722	3935	5226	3373	4631	3228.33	2881.65	2941.07	4430.41	5203.33	2792.81	4286.05	4574.89	4122.65
Slc30a4	976.154	0.375346	0.132031	2.84287	0.00447094	0.119463	ENSMUSG00000005802	9.38553	10.018	10.0852	8.1513	7.1201	6.53061	7.95877	8.35454	7.86458	1367	1179	830	987	605	1045	1103	756	1043	1071.24	1207.69	1177.02	954.008	812.766	749.196	873.922	1006.36	933.177
Sgk1	127.2	1.24684	0.438518	2.84332	0.00446466	0.119463	ENSMUSG00000019970	2.34879	8.37915	3.74863	1.25561	1.38488	1.84983	1.76203	2.35365	3.84401	131	325	90	65	45	122	101	86	130	96.9352	365.245	158.192	53.1361	57.1614	76.7334	69.9601	102.514	164.924
Zfp777	697.801	-0.645092	0.226899	-2.84308	0.00446794	0.119463	ENSMUSG00000071477	9.8646	10.11	13.7343	21.8843	22.2588	11.0979	17.0709	19.1986	15.0163	574	474	417	922	608	744	967	670	863	434.021	469.818	617.896	987.333	979.461	490.781	722.585	891.471	686.84
Pet100	1537.5	-0.374164	0.13161	-2.84298	0.00446937	0.119463	ENSMUSG00000087687	170.454	163.903	177.641	220.213	237.43	181.589	246.872	248.719	208.197	1625	1262	997	1614	1261	1850	2148	1360	1926	1249.72	1269.2	1331.73	1655.88	1740.94	1338.06	1741.27	1923.91	1586.83
Ube2c	30.0749	1.79452	0.631535	2.84153	0.00448976	0.11958	ENSMUSG00000001403	2.62691	5.48598	1.6325	1.5017	1.06397	0.826353	0.291525	1.72482	0.365492	56	94	20	26	15	20	6	22	7	44.4237	97.9876	28.2292	26.0406	17.995	14.0459	4.74291	30.7836	6.42553
Homer1	1693.73	0.302212	0.106387	2.84068	0.00450175	0.11958	ENSMUSG00000007617	24.9807	25.6978	25.847	22.3315	22.5643	21.3011	21.9073	19.6863	17.9839	2393	1847	1399	1691	1202	2236	1935	1181	1683	1848.73	2008.68	1955.93	1694.67	1670.1	1584.48	1559.76	1537.58	1383.61
Mndal	1463.49	0.600343	0.211332	2.84076	0.00450067	0.11958	ENSMUSG00000090272	49.4719	64.3918	57.4088	47.0868	26.3749	49.3426	45.1655	30.6635	30.8922	1977	2080	1326	1579	652	2261	1821	772	1193	1595.47	2193.01	1893.8	1557.51	850.774	1599.24	1401.54	1044.02	1036.04
Txnip	891.087	0.703859	0.247852	2.83983	0.00451371	0.119673	ENSMUSG00000038393	30.0666	23.8598	43.1304	19.2702	15.3336	15.7885	16.673	23.6443	28.7818	1320	928	971	733	443	825	791	654	1262	1089.91	913.647	1597.79	716.686	556.48	575.015	581.249	904.085	1084.93
Dock11	1833.51	0.430321	0.151611	2.83832	0.00453514	0.119791	ENSMUSG00000031093	20.9905	23.7943	24.3638	14.6314	17.1205	18.6768	20.7462	13.3625	19.6157	2563	2379	1701	1391	1252	2651	2049	1059	1922	1963.74	2351.15	2330.67	1403.61	1601.88	1756.22	1867.24	1319.33	1907.78
Rnf126	2256.3	-0.385954	0.135952	-2.83889	0.00452706	0.119791	ENSMUSG00000035890	68.4831	56.1088	61.462	74.4355	100.815	74.7711	74.9419	84.6885	81.5145	2597	1669	1354	2326	2190	3069	2683	1956	2803	2018.03	1746.32	1851.94	2249.18	2971.15	2214.59	2124.57	2633.76	2497.13
Med14	1523.35	0.472534	0.166602	2.8363	0.00456394	0.120326	ENSMUSG00000064127	13.5915	12.0846	13.0581	9.0558	6.43261	11.253	10.4565	9.09831	10.0976	2469	1735	1346	1363	685	2216	1814	1000	1667	1923.1	1805.99	1889.26	1313.89	910.278	1600.36	1423.39	1358.63	1485.3
Smpd2	88.7971	0.942308	0.332512	2.83391	0.00459829	0.120405	ENSMUSG00000019822	3.48822	4.1058	5.22956	1.7133	1.29766	2.32593	2.2341	2.41835	3.41632	108	97	87	56	40	107	92	63	123	103.79	129.326	159.471	52.3542	38.7016	69.6919	64.0852	76.0791	105.675
Parg	3459.58	0.396892	0.140099	2.83294	0.00461227	0.120405	ENSMUSG00000021911	63.2766	48.3825	57.0366	33.1449	42.9712	48.4064	49.8545	39.7267	45.0088	5681	3531	2994	2486	2314	4891	4179	2317	3801	4529.21	3657.75	4174.53	2432.73	3076.16	3482.54	3433.08	3001.01	3349.18
Wdr12	8972.28	-0.398704	0.140787	-2.83196	0.0046264	0.120405	ENSMUSG00000026019	152.706	134.016	127.11	201.075	212.612	159.798	218.667	165.808	148.059	9936	6722	5330	10911	8438	11913	13493	6670	9396	7991.96	7408.15	6802.2	10790.9	11128.5	8405.34	11009.9	9158.24	8055.33
Csrnp1	410.212	1.55941	0.550529	2.83256	0.00461762	0.120405	ENSMUSG00000032515	8.21143	33.9975	5.53148	5.34284	4.01192	6.31356	5.92358	5.824	5.85396	448	1521	205	204	136	400	321	204	314	362.874	1586.83	249.951	242.107	177.314	280.431	251.838	271.622	268.936
Klhl24	2039.76	0.725098	0.256043	2.83194	0.0046267	0.120405	ENSMUSG00000062901	14.3194	31.5712	14.6815	9.71121	11.1905	17.3621	12.9161	12.0235	11.634	2502	3754	1394	1403	1125	3203	2088	1312	1853	1898.16	4420.26	1990.02	1320.02	1483.58	2313.29	1647.19	1682.08	1603.24
Zfp26	1601.7	0.504077	0.177987	2.83209	0.00462442	0.120405	ENSMUSG00000063108	9.2943	8.25308	8.70781	6.40345	4.73722	8.76789	5.96458	5.37925	6.15155	2429	1743	1474	1478	772	2778	1665	996	1666	2066.24	1937.88	1979.47	1459.74	1053.27	1959.18	1275.69	1262.1	1421.71
Gm47111	28.2611	-1.69048	0.596254	-2.83517	0.00458015	0.120405	ENSMUSG00000111341	0.284069	0.046028	0.196636	0.730904	0.549139	0.585263	0.661915	0.720709	0.190613	23	3	9	49	26	52	51	36	14	17.9901	3.07879	12.7335	47.4645	34.7812	37.2542	40.3285	48.1699	12.5494
Eri3	2649.98	-0.405519	0.143452	-2.82685	0.0047008	0.122108	ENSMUSG00000033423	78.3886	60.6343	71.6628	89.4707	120.395	80.7645	101.091	82.4281	90.5182	3061	1852	1578	2829	2761	3396	3636	2022	3231	2374.37	1939.82	2219.55	2778.91	3647.18	2458.85	2945.84	2634.98	2850.32
Rrp7a	5949.11	-0.374278	0.132504	-2.82466	0.00473305	0.122629	ENSMUSG00000018040	115.783	92.3198	103.284	144.427	168.032	120.729	142.207	120.841	120.298	6814	4745	3460	6621	5670	8154	7828	4715	6604	5410.48	4556.48	4934.66	6920.47	7853.04	5670.71	6393.15	5959.15	5843.84
Atp2b4	12.8983	3.26285	1.15527	2.82431	0.00473822	0.122629	ENSMUSG00000026463	0.497328	2.20321	0.835278	0	0.015549	0.058163	0.469588	0	0.328799	5	22	6	0	2	14	4	0	17	12.6994	59.4215	21.8095	0	0.397086	1.49279	11.5363	0	8.72834
Yipf1	766.605	-0.462761	0.163985	-2.82197	0.00477301	0.123303	ENSMUSG00000057375	26.0847	22.4708	29.3653	35.7438	36.3128	28.1284	35.2888	41.1124	39.9156	779	521	485	885	594	969	1003	755	1016	600.056	545.975	690.743	843.153	835.447	650.378	780.986	998.126	954.577
Card6	3118.55	0.525957	0.186463	2.82071	0.00479177	0.123561	ENSMUSG00000041849	42.8582	65.1171	49.5562	30.0304	34.9073	42.0827	31.1158	40.286	43.2422	4094	4969	2703	2349	1563	4403	2696	2260	3917	3102.28	4978.74	3668.15	2229.04	2527.22	3061.96	2166.98	3078.39	3254.23
S100a6	11.2998	1.95489	0.694068	2.81657	0.00485397	0.12421	ENSMUSG00000001025	2.84037	3.71043	1.16523	0.590436	0.480122	1.21488	0.48673	0.463172	0.758019	27	43	6	7	2	14	7	2	10	24.0664	33.2054	10.0954	5.12988	4.06857	10.3463	3.96758	4.14176	6.67696
Cpeb4	507.209	0.834122	0.296197	2.81611	0.00486096	0.12421	ENSMUSG00000020300	4.13775	9.03247	4.8294	3.35775	2.50507	5.69663	3.05246	2.79985	3.15998	624	1079	422	410	215	940	421	249	412	478.587	1103.44	571.17	398.238	289.781	662.262	339.662	341.773	379.964
Psmd12	10679.1	-0.351403	0.124771	-2.81638	0.00485685	0.12421	ENSMUSG00000020720	233.502	237.27	243.582	313.958	332.169	358.083	334.154	246.717	264.184	11051	9003	6544	12243	9163	18597	14939	7148	11314	8619.28	9250.6	9193.91	11883.7	12262.9	13285.5	11866.6	9611.38	10137.9
Tor1a	1940.84	-0.452864	0.160709	-2.81791	0.00483368	0.12421	ENSMUSG00000026849	69.5301	54.2311	62.7292	88.7039	104.051	63.2202	99.2248	84.8429	76.5011	2233	1333	1147	2262	1820	2147	2899	1661	2255	1700.9	1401.2	1569.1	2225.08	2545.69	1554.45	2335.21	2190.42	1945.52
Pdpr	182.382	0.791017	0.280782	2.81719	0.0048446	0.12421	ENSMUSG00000033624	3.85297	1.85638	1.941	1.55675	1.11608	2.06674	1.41131	1.36215	1.3726	399	197	144	170	86	254	163	111	164	376.218	191.451	193.797	155.87	108.992	202.836	132.577	140.371	139.331
Ppp3r1	1734.16	0.538323	0.191342	2.81341	0.00490188	0.124803	ENSMUSG00000033953	47.8792	35.3695	44.8592	30.0843	20.7968	39.4599	25.8074	29.9044	31.5067	3227	1805	1702	1631	731	2706	1413	1251	1883	2398.49	1871.41	2297.84	1545.36	1041.94	1986.84	1243.76	1581.01	1640.8
Cbx6	112.461	0.904888	0.321623	2.81351	0.00490043	0.124803	ENSMUSG00000089715	1.15498	1.7778	1.00098	0.630299	0.404585	0.849646	1.08678	0.680143	0.633897	168	240	91	83	38	131	133	72	92	139.371	226.585	123.791	77.9911	48.8273	103.051	126.394	86.6177	79.5207
Polr3d	3262.2	-0.34198	0.121785	-2.80806	0.00498403	0.125121	ENSMUSG00000000776	80.5363	67.1242	78.5219	100.247	107.672	95.5806	112.618	80.8629	83.8404	3688	2444	2083	3869	2831	4851	4715	2394	3407	2886.67	2541.16	2877.88	3684.48	3859.79	3443.42	3883.43	3058.87	3124.07
Chaf1a	242.176	0.582438	0.207349	2.80897	0.00497009	0.125121	ENSMUSG00000002835	2.24559	2.25027	2.55693	1.02439	1.92529	1.61521	1.6456	1.64064	1.68185	366	289	231	148	189	307	248	163	256	289.431	306.505	336.874	135.669	248.38	209.171	204.237	223.951	225.37
Cers4	429.982	-0.499702	0.177958	-2.80798	0.00498532	0.125121	ENSMUSG00000008206	5.69672	5.28293	4.75276	7.8635	6.47991	7.27463	6.27578	7.98391	9.11646	521	539	301	364	339	621	513	264	471	355.954	348.651	303.662	503.829	404.94	456.872	377.256	526.491	592.184
Wdr4	4731.81	-0.403974	0.143755	-2.81015	0.00495182	0.125121	ENSMUSG00000024037	84.077	74.0635	78.0953	106.389	135.99	86.1136	115.763	94.2097	94.7298	5289	3555	2582	5522	4895	5971	6795	3673	5305	4054.28	3772	3850.68	5260.78	6559.05	4174.32	5371.02	4794.91	4749.24
Ncoa7	186.407	0.934159	0.332483	2.80965	0.00495961	0.125121	ENSMUSG00000039697	3.42044	2.30564	5.15805	1.88325	1.44614	1.97444	1.17551	1.76666	3.12542	305	204	229	173	68	232	116	110	218	252.386	179.689	389.174	142.492	106.72	146.434	83.4471	137.576	239.747
Polr2j	2331.91	-0.428075	0.152301	-2.81072	0.00494311	0.125121	ENSMUSG00000039771	199.658	172.726	204.433	264.4	307.855	197.032	248.803	283.628	265.521	2489	1677	1487	2619	2181	2693	3031	2056	2937	1919.49	1754.42	2010.35	2606.33	2960.4	1903.7	2301.21	2877.71	2653.61
Havcr1	217.777	0.573391	0.204129	2.80897	0.0049701	0.125121	ENSMUSG00000040405	8.18168	6.40124	5.96584	5.86972	3.61009	4.48297	4.61736	4.4619	4.84695	416	261	172	246	107	250	224	139	223	324.949	268.402	242.171	238.941	143.333	178.877	176.347	186.939	200.034
Cyp2d22	6.08246	4.10616	1.46181	2.80895	0.00497035	0.125121	ENSMUSG00000061740	0.067572	0.800929	0.982657	0	0	0.137918	0.053505	0	0	6	16	11	0	0	7	1	0	0	1.75443	21.9638	26.0883	0	0	3.59918	1.33648	0	0
Klrd1	7.44672	3.16636	1.12832	2.80626	0.00501207	0.125293	ENSMUSG00000030165	2.42929	1.38414	0.430409	0.383432	0	0	0.094554	0.086883	0.346149	39	17	4	6	0	0	1	1	6	30.9116	18.6025	5.60016	5.003	0	0	1.15751	1.16677	4.57897
Eif1	37450.7	0.263897	0.0940534	2.80582	0.00501881	0.125293	ENSMUSG00000035530	2838.87	3217.22	3023.63	2551.16	2444.52	2606.02	2745.08	2352.42	2629.95	47976	42554	27363	39484	25073	51974	43478	27021	40966	38479.9	46058.9	41908.2	35458.7	33138.5	35504.2	35796.4	33652.2	37059.7
Abitram	1375.48	0.295095	0.105147	2.80651	0.00500821	0.125293	ENSMUSG00000038827	19.493	17.7837	18.8059	15.5474	13.6791	15.3131	17.4396	14.8381	15.622	1965	1413	1187	1322	891	1738	1701	989	1469	1595.99	1537.87	1574.42	1305.29	1120.11	1260.16	1373.69	1282.14	1329.69
Slc25a39	8152.64	-0.392176	0.140034	-2.80057	0.00510128	0.125793	ENSMUSG00000018677	255.225	191.987	234.751	294.427	343.176	232.211	325.062	302.395	309.764	9604	5775	4674	9090	7630	9259	11374	7007	10546	7400.55	5879.78	6960.25	8754.21	9952.01	6767.65	9067.9	9253.83	9337.58
Cxxc1	2897.06	-0.271266	0.0967635	-2.80339	0.00505689	0.125793	ENSMUSG00000024560	56.9769	49.2444	53.5526	59.4175	70.6458	62.156	69.8957	61.5364	66.5063	3440	2245	1753	3067	2545	4016	4027	2290	3511	2656.96	2425.44	2553.54	2841.18	3294.78	2913.29	3135.72	3028.48	3224.12
Abcf2	10061.4	-0.383038	0.136728	-2.80146	0.00508721	0.125793	ENSMUSG00000028953	176.656	146.354	153.258	220.181	259.552	180.783	231.828	186.229	179.114	11621	7740	5707	11974	9974	13050	14530	7539	10680	9084.95	7949.6	8059.21	11611.1	13349.7	9344.73	11469.9	10107.6	9576.05
Mfsd12	1302.42	-0.309292	0.110384	-2.80197	0.00507924	0.125793	ENSMUSG00000034854	15.1593	13.0894	11.9431	16.3736	18.0418	17.1127	17.8752	16.2602	15.3231	1587	1105	690	1422	1106	1966	1779	1053	1447	1237.83	1129.38	997.946	1371.45	1473.87	1404.51	1404.47	1401.58	1300.74
Nrros	5429.15	-0.4457	0.159123	-2.80097	0.00509487	0.125793	ENSMUSG00000052384	98.5043	86.5376	72.5865	120.637	150.207	92.0478	131.574	110.789	105.641	6087	4570	2670	6278	5479	6436	8115	4286	6000	4891.9	4539.15	3685.99	6143.29	7460.47	4594.64	6286.27	5806.64	5454.03
Hnrnpa3	15186.2	0.429946	0.153513	2.80071	0.00509908	0.125793	ENSMUSG00000059005	340.919	426.989	387.182	252.029	251.902	347.108	263.399	291.114	330.296	19528	19940	12660	12502	8570	24928	15026	10431	17561	15789.1	20887.3	18335.6	11968.9	11668.1	16158.2	11736.6	14229.1	15903
Gm43388	213.629	0.751274	0.268183	2.80135	0.00508896	0.125793	ENSMUSG00000104927	12.5011	8.11155	18.1876	8.37551	7.02462	5.66504	7.8948	7.37582	9.93406	356	184	296	195	116	177	216	127	255	277.286	190.034	412.508	190.498	155.832	126.298	168.47	172.662	229.07
Fmr1	2742.39	0.448084	0.16009	2.79896	0.00512676	0.12595	ENSMUSG00000000838	36.8314	51.1049	40.5294	32.4332	25.3392	35.7257	38.1977	28.4449	31.2759	3580	3921	2209	2656	1436	3597	3379	1773	2865	2788.29	4085.7	3137.51	2517.74	1918.06	2718.25	2781.72	2273.13	2461.11
Adgre5	320.067	0.967703	0.346004	2.79679	0.00516123	0.12595	ENSMUSG00000002885	5.60216	17.6509	5.56831	5.48031	3.61558	5.80555	6.20755	4.93358	4.18485	320	822	177	254	149	384	388	188	242	266.94	886.828	270.461	267.175	172.56	277.856	284.31	247.639	206.835
Fam162a	4306.18	-0.357565	0.127839	-2.797	0.00515791	0.12595	ENSMUSG00000003955	470.696	369.346	457.086	594.186	609.006	456.7	566.332	560.129	568.588	4994	2971	2996	5037	3635	5028	6014	3498	5354	3854.46	3194.77	3827.36	4989.34	4987.26	3759	4461.72	4840.88	4840.83
Pithd1	4955.18	-0.393899	0.140766	-2.79825	0.00513797	0.12595	ENSMUSG00000028669	146.254	117.261	132.548	184.497	215.255	143.458	194.359	161.987	153.583	5525	3688	2972	6014	4820	6293	6527	4014	5471	4431.31	3752.52	4106.5	5732.06	6522.74	4368.8	5665.36	5179.76	4837.59
Aimp2	3821.52	-0.445085	0.159095	-2.79761	0.00514829	0.12595	ENSMUSG00000029610	170.127	122.407	148.065	225.94	225.441	149.42	205.826	216.78	186.408	4512	2556	2238	4792	3422	4327	5204	3444	4444	3485.38	2648.31	3102.18	4746.59	4619.37	3076.94	4057.03	4687.74	3970.14
Anxa2	18.7571	2.11441	0.755273	2.79953	0.00511767	0.12595	ENSMUSG00000032231	1.1392	2.96324	1.21596	0.204523	0	0.764539	0.464567	0.664731	0.319711	38	82	24	2	0	32	6	14	10	24.1256	66.2812	26.3313	4.44137	0	16.2739	9.4651	14.8569	7.03873
Phf19	41.9486	1.47118	0.52621	2.7958	0.00517713	0.12612	ENSMUSG00000026873	0.39536	2.11627	0.774521	0.351613	0.580683	0.450037	0.246063	0.378481	0.419295	38	93	43	26	19	42	23	23	30	25.3493	143.315	50.7789	23.1174	37.2363	29.0027	15.1782	25.6109	27.9484
Ighv3-6	92.4712	0.816794	0.292452	2.79292	0.00522346	0.127029	ENSMUSG00000076672	52.5118	21.1529	37.5685	21.843	20.1395	20.5569	24.0658	19.2294	21.3595	233	71	102	74	50	100	109	52	83	180.45	76.7746	132.008	76.9681	69.215	71.0021	79.5612	69.7382	76.5231
Vps72	2414.47	-0.324779	0.116354	-2.7913	0.00524969	0.127228	ENSMUSG00000008958	84.3857	68.4977	73.392	88.3375	109.648	91.3301	90.7899	96.7151	95.8927	2855	1907	1415	2612	2112	3481	2983	1953	3002	2255.71	1933.91	2006.03	2421.35	2931.34	2453.82	2334.81	2728.44	2664.78
mt-Nd3	630.961	0.693482	0.248414	2.79164	0.00524421	0.127228	ENSMUSG00000064360	223.602	257.629	245.969	98.5915	113.148	216.485	122.106	176.767	180.653	981	855	661	330	278	1041	547	473	692	759.911	924.858	855.25	343.35	384.863	739.512	399.163	633.59	638.15
Dpm2	1660.52	-0.2712	0.0972341	-2.78915	0.00528471	0.127595	ENSMUSG00000026810	106.287	93.5001	88.879	115.867	123.432	113.443	125.494	114.38	113.076	2005	1497	982	1764	1341	2382	2278	1265	1921	1570.83	1459.51	1343.14	1755.93	1824.43	1685.16	1784.31	1784.04	1737.32
Slc35d1	295.113	0.568005	0.203624	2.78948	0.00527933	0.127595	ENSMUSG00000028521	5.1063	5.8402	4.57456	3.51181	3.17527	3.77439	5.06604	2.72156	3.04208	474	406	270	275	176	383	365	148	248	362.328	437.694	331.911	255.52	225.336	269.189	345.832	203.807	224.403
Ifi27	166.592	0.897318	0.321769	2.7887	0.00529195	0.127595	ENSMUSG00000064215	15.1087	21.1466	15.7244	6.99043	6.93321	13.0249	5.45137	11.4264	12.455	258	297	158	105	69	259	87	112	196	204.139	301.777	217.245	96.8504	93.6886	176.884	70.8607	162.935	174.947
Igkv8-24	94.0023	0.961646	0.344985	2.7875	0.00531163	0.127851	ENSMUSG00000076583	41.5677	39.2527	28.3097	18.4847	20.0736	8.71416	20.8465	17.2187	28.3009	200	143	83	68	54	46	102	50	119	154.641	154.235	107.691	70.5146	74.6872	32.5842	74.6105	67.6043	109.454
Srsf1	15263.6	0.426743	0.153138	2.78666	0.00532546	0.127965	ENSMUSG00000018379	228.719	344.849	235.902	208.175	188.3	226.747	213.448	188.701	198.927	20001	18470	11966	15270	9252	22319	16641	10256	15979	15140.8	24111.5	15968.2	14131	12466.6	15087	13593.8	13183.4	13690
Dnlz	1582.02	-0.372249	0.133624	-2.7858	0.00533962	0.128087	ENSMUSG00000075467	24.8073	17.8746	23.3156	27.2477	31.285	24.5748	31.2739	29.4528	28.6457	1861	1082	990	1693	1375	2024	2237	1363	1951	1457.26	1109.01	1399.72	1641.03	1838.17	1450.73	1767.02	1826.33	1748.92
Edaradd	92.8712	0.89644	0.321922	2.78465	0.00535852	0.128323	ENSMUSG00000095105	0.74627	1.44831	0.57328	0.45566	0.541498	0.466882	0.598647	0.448695	0.533115	134	210	58	68	57	92	102	50	87	104.941	215.109	82.4312	65.7035	76.1551	65.989	80.988	66.5897	77.9349
Dpp4	345.674	0.596526	0.214298	2.78363	0.00537548	0.128433	ENSMUSG00000035000	5.2814	4.95417	5.04592	2.66677	2.91703	4.3461	3.03777	2.88199	4.54588	514	477	378	227	169	396	370	222	441	451.577	447.513	441.177	233.819	249.454	373.517	249.891	260.026	404.088
Iqce	93.9264	1.09275	0.392613	2.78327	0.00538136	0.128433	ENSMUSG00000036555	2.03272	3.1029	3.07235	0.828049	0.712815	1.4087	0.928752	1.91349	1.99003	110	85	94	55	51	85	95	81	106	104.705	168.812	161.821	43.7364	36.7213	72.9327	46.0244	104.021	106.564
Gimap8	1407.68	0.666904	0.239816	2.7809	0.00542088	0.129158	ENSMUSG00000064262	23.808	35.8948	27.1562	13.1826	15.7031	30.0391	20.4827	16.4877	15.5113	1922	2248	1247	877	734	2669	1566	813	1125	1492.2	2376.2	1740.4	847.234	984.338	1892.37	1235.07	1090.62	1010.68
Gvin-ps7	992.337	2.1578	0.776089	2.78035	0.00543008	0.129159	ENSMUSG00000063286	5.17335	44.9279	9.5491	2.24447	3.38318	11.5341	3.15014	3.45272	3.84272	671	4538	607	252	262	1608	401	271	404	511.278	4691.6	964.593	227.539	334.519	1146.43	299.839	360.652	394.58
Luc7l2	3906.46	0.548626	0.197398	2.77929	0.00544781	0.129362	ENSMUSG00000029823	88.0685	124.182	78.9968	68.9868	57.0941	95.1154	62.3938	62.2599	58.6838	5336	6049	2770	3768	2285	6179	3786	2509	3427	4359.86	6493.16	3998.89	3502	2826.82	4732.77	2971.64	3252.86	3020.17
Entr1	4261.43	-0.348287	0.12557	-2.77364	0.00554324	0.13053	ENSMUSG00000026927	104.502	97.3352	96.0199	133.776	158.693	115.339	131.052	116.446	112.84	4714	3445	2518	5086	3994	5631	5780	3265	4779	3699.01	3638.87	3474.54	4855.66	5617.31	4103.42	4462.49	4349.28	4152.27
Svbp	1218.15	-0.423413	0.152602	-2.77461	0.00552676	0.13053	ENSMUSG00000028643	94.8645	78.9807	78.1991	118.869	112.175	90.1451	110.703	133.019	117.539	1407	922	675	1420	956	1474	1604	1163	1561	1092.46	960.66	920.83	1403.68	1291.97	1043.42	1226.48	1616.67	1407.17
D11Wsu47e	1359.92	-0.436242	0.157256	-2.77408	0.00553573	0.13053	ENSMUSG00000041623	34.3678	29.24	32.3696	45.1597	56.6031	35.7144	47.316	42.3145	35.9986	1471	950	870	1583	1391	1727	1933	1047	1449	1153.17	1036.25	1110.59	1553.78	1899.48	1204.48	1527.39	1498.43	1255.7
Mtmr11	23.8418	-2.05355	0.740355	-2.77374	0.00554153	0.13053	ENSMUSG00000045934	0.15689	0.185062	0.237532	0.97341	0.05717	1.53665	1.16622	0.765059	0.456049	13	13	10	20	3	45	39	11	28	5.99136	7.85944	9.19948	38.359	2.36428	59.6816	43.0546	29.9203	18.1465
Gm28437	36204.2	0.594018	0.214028	2.77542	0.00551301	0.13053	ENSMUSG00000101111	3708.25	3541.59	3623.12	2200.28	1678.55	2868.94	1732.86	3076.66	2929.78	60117	45177	33990	28731	15624	51024	27288	29463	42497	46594.5	47001.6	46549.8	28349.4	21093	36232.5	20947.2	40799.6	38270.5
Aldh18a1	4844.18	-0.380698	0.137329	-2.77217	0.00556844	0.130905	ENSMUSG00000025007	60.6673	58.5702	51.3464	77.2545	85.1166	71.4964	92.4554	62.7936	61.981	5378	4119	2614	5600	4461	6830	7792	3442	4919	4192.4	4274.95	3628.22	5474.31	5882.67	4966	6146.67	4579.62	4452.75
Fuca2	260.88	0.569642	0.205639	2.77011	0.00560375	0.131516	ENSMUSG00000019810	10.8861	9.96228	7.58887	8.57699	6.48102	5.58832	5.73195	6.13908	6.31957	520	343	201	271	163	231	228	192	268	372.455	360.004	265.494	300.909	221.768	192.175	188.671	221.672	224.777
Sf3a2	3449.97	-0.318551	0.115097	-2.76767	0.00564586	0.132284	ENSMUSG00000020211	101.117	87.6327	105.818	119.966	141.25	128.904	116.501	125.518	110.267	3905	2765	2110	3643	3046	5177	4086	3012	3995	2976.5	2724.47	3185.38	3620.58	4157.63	3813.25	3298.97	3899.11	3373.84
Satb2	19.8961	1.6785	0.606744	2.7664	0.00566784	0.132579	ENSMUSG00000038331	0.438026	0.178859	0.326965	0.114134	0.043863	0.097566	0.037474	0.168252	0.134831	57	18	27	16	4	18	6	13	16	49.8416	21.4957	38.0426	13.317	4.99171	11.1193	4.10229	20.205	15.9495
Nsun5	3156.78	-0.348921	0.12628	-2.76308	0.00572583	0.133639	ENSMUSG00000000916	78.1635	74.4181	63.6291	95.1051	110.167	82.595	99.3736	88.4515	82.5462	3665	2565	1746	3670	2951	4211	4304	2486	3538	2820.87	2836.43	2348.07	3518.95	3975.92	2995.93	3450.11	3368.26	3096.48
Rtcb	11249.2	-0.367214	0.132943	-2.76219	0.00574158	0.133639	ENSMUSG00000001783	264.756	205.595	244.677	317.211	366.846	254.363	352.332	285.588	289.134	13097	8140	6886	12877	10565	13681	16684	8717	12990	10227.3	8388.38	9664.64	12565.1	14172.8	9876.1	13093.9	11643	11611.2
Zbtb20	483.867	0.695377	0.251707	2.76265	0.00573346	0.133639	ENSMUSG00000022708	4.5536	7.17364	5.28276	2.09569	3.8886	4.90544	3.83101	2.79398	3.8895	790	1078	428	248	242	722	478	255	454	506.144	842.183	600.421	238.86	432.281	548.04	409.669	327.755	449.443
Spata6	59.02	1.46818	0.531813	2.76071	0.0057675	0.1338	ENSMUSG00000034401	1.07133	4.87286	1.64846	0.535965	1.14291	1.21244	1.64321	0.594322	0.497918	48	107	54	21	42	68	84	23	25	42.0268	201.899	66.1236	21.5594	44.8401	47.8053	62.0148	24.6054	20.3059
Zfp526	75.8288	0.754118	0.273144	2.76088	0.00576464	0.1338	ENSMUSG00000046541	1.18921	1.74378	1.46329	0.861253	0.851863	1.06305	0.72631	0.880403	0.8862	105	124	73	63	44	103	61	48	71	82.144	127.22	103.354	61.0025	58.8493	73.8052	48.266	64.181	63.6374
Smn1	2255.66	-0.345921	0.125407	-2.75838	0.00580885	0.134538	ENSMUSG00000021645	98.9461	73.1701	90.1676	128.873	111.467	103.48	114.691	110.382	103.967	2642	1596	1431	2832	1812	3035	3076	1852	2581	2112.24	1649.78	1968.21	2821.01	2379.82	2220.31	2355.46	2486.84	2307.3
Klra13-ps	4.03313	3.63754	1.31904	2.75772	0.00582067	0.134591	ENSMUSG00000030178	1.35229	0.209408	1.62677	0.205005	0	0	0.083388	0.140004	0.091758	18	2	12	2	0	0	1	1	1	13.0045	2.12697	16.0354	2.02155	0	0	0.771481	1.42092	0.917334
Atf6	1964.42	0.508317	0.184619	2.75333	0.0058992	0.136184	ENSMUSG00000026663	13.9651	19.9707	16.3017	11.4255	10.11	16.2926	10.3845	11.7899	11.6035	2655	2992	1693	1656	1041	3160	1821	1309	1931	1984.31	2997.13	2368.5	1664.71	1436.71	2326.86	1419.55	1767.99	1714.02
Tmem154	250.406	0.881983	0.320509	2.75182	0.00592647	0.13659	ENSMUSG00000056498	4.84122	4.81207	6.25299	1.35603	2.11632	2.43878	3.33747	3.78741	4.36156	366	330	305	98	108	232	265	204	332	320.724	336.71	423.585	92.1178	140.221	162.392	212.713	264.804	300.386
Ctse	43.2779	1.2831	0.466572	2.75005	0.00595863	0.136883	ENSMUSG00000004552	1.41712	2.1197	1.4913	0.883723	0.320467	0.364575	1.11688	0.500152	0.991042	75	91	44	39	10	21	57	16	48	58.679	92.7039	63.1417	37.5224	13.2713	15.1732	44.492	21.8567	42.6609
Copg2	1115.74	0.524309	0.190644	2.7502	0.00595588	0.136883	ENSMUSG00000025607	23.3442	20.3933	20.8418	11.4716	21.9777	14.2884	12.8347	14.7199	15.5344	2038	1307	1080	691	1074	1112	991	717	1213	1480.19	1366.39	1351.6	746.219	1394.04	910.7	782.789	985.6	1024.11
Plec	296.219	0.890008	0.323706	2.74943	0.00596987	0.136919	ENSMUSG00000022565	1.01925	2.00246	1.06483	0.498328	0.600584	1.14932	0.536438	1.00068	0.694275	416	661	245	138	144	516	208	193	258	309.349	641.921	330.465	155.09	182.304	350.613	156.636	320.533	219.06
Pttg1	1047.64	-0.406487	0.147942	-2.7476	0.00600324	0.1374	ENSMUSG00000020415	76.5004	62.2763	60.7562	94.3685	105.135	75.6974	87.9684	94.5602	77.605	1220	828	574	1203	977	1399	1425	883	1111	964.946	829.678	783.62	1220.58	1326.29	959.7	1067.5	1258.79	1017.63
Phlpp1	865.301	0.418781	0.152438	2.74722	0.00601035	0.1374	ENSMUSG00000044340	8.10826	9.82332	6.8945	5.55345	5.67391	6.7999	7.16482	6.19587	6.31478	1290	1257	650	703	503	1070	982	626	960	990.753	1267.78	861.423	695.824	693.384	835.133	842.255	798.999	802.155
Aup1	6132.17	-0.317533	0.115623	-2.74629	0.00602727	0.137564	ENSMUSG00000068328	268.196	306.947	252.634	337.537	391.207	360.668	375.576	326.312	302.896	6595	5256	3387	6766	5374	9334	8462	5088	6629	4981.41	6021.75	4798.71	6428.86	7268.03	6733.66	6711.57	6396.64	5848.89
Exosc8	5118.79	-0.367542	0.133886	-2.74519	0.00604751	0.137803	ENSMUSG00000027752	198.229	155.736	184.8	243.532	270.55	188.969	257.514	233.985	210.629	5825	3678	3212	6060	4716	6274	7263	4242	5682	4622.66	3835.64	4406.72	5823.22	6309.98	4428.95	5777.29	5758.57	5106.06
Tank	4931.4	0.522807	0.19066	2.74209	0.0061049	0.138886	ENSMUSG00000064289	126.167	203.052	120.06	106.26	99.9161	135.217	102.824	88.8173	103.469	6415	8764	3510	4422	2945	7604	5033	2774	4755	5051.9	8587.45	4915.68	4362.93	4001.28	5441.97	3961	3753.3	4307.07
Renbp	1050.45	-0.405873	0.148261	-2.73756	0.00618963	0.140587	ENSMUSG00000031387	36.2011	36.1154	25.8807	48.568	44.3516	44.2097	49.3448	40.2777	37.4851	1198	936	487	1334	866	1463	1571	824	1141	929.126	979.023	679.211	1278.21	1138.45	1140.48	1218.42	1091	1000.17
Dgka	91.6744	1.12336	0.410739	2.73499	0.00623829	0.141465	ENSMUSG00000025357	1.58535	3.21757	2.54553	0.859295	0.888915	0.543764	1.19579	1.27145	2.06955	115	189	105	52	38	43	82	56	136	89.9155	192.746	147.635	49.9747	50.4224	30.9981	65.2475	76.1054	122.024
Phb	14550.9	-0.415059	0.151943	-2.73168	0.00630127	0.14254	ENSMUSG00000038845	678.551	571.981	665.405	932.169	1010.57	623.339	983.052	766.351	853.814	15983	10104	9118	17036	13352	15802	21770	12486	17395	12344.9	10990.4	12378.8	17389.9	18386.9	11398.7	17206.2	14714.1	16148.2
Edem3	1073.5	0.378787	0.138677	2.73143	0.00630593	0.14254	ENSMUSG00000043019	9.98215	8.67207	9.3789	8.5419	6.39857	8.25188	7.55189	6.26997	6.56251	1686	1170	899	1203	636	1531	1216	660	1013	1323.14	1214.1	1271.19	1161.01	848.241	1099.39	963.029	877.112	904.305
Ift20	2324.64	-0.343379	0.12593	-2.72675	0.00639615	0.143628	ENSMUSG00000001105	144.21	114.981	128.607	171.411	163.744	158.912	157.45	190.555	150.677	2638	1798	1467	2634	1856	3268	2942	2146	2581	2146.45	1807.57	1957.33	2616.15	2437.48	2377.36	2254.59	2993.31	2331.48
Lats2	615.979	0.516913	0.189574	2.72671	0.00639688	0.143628	ENSMUSG00000021959	7.02952	9.73688	5.61905	5.38865	5.12045	4.58866	6.36711	5.41337	4.96478	920	918	394	574	391	668	799	426	588	704.478	1030.64	575.812	553.758	513.219	462.213	613.881	572.553	517.253
Tagap1	3393	-0.417309	0.153068	-2.7263	0.00640495	0.143628	ENSMUSG00000052031	57.381	59.5876	59.829	83.0321	101.879	67.4971	93.1537	68.7351	65.1458	3365	2807	1988	4022	3488	4344	5209	2477	3461	2629.76	2884.5	2803.93	3902.77	4670.1	3109.61	4107.37	3325.2	3103.8
Igkv16-104	123.332	0.74176	0.27201	2.72696	0.0063921	0.143628	ENSMUSG00000076522	54.6495	38.9998	30.4249	25.1507	20.5263	22.5113	21.1041	27.6085	32.928	281	152	95	99	59	127	110	85	148	216.979	163.546	123.519	102.395	81.5066	89.8346	80.6115	115.685	135.912
Gm45731	39.2667	-1.2058	0.441948	-2.72837	0.00636481	0.143628	ENSMUSG00000110689	0.645928	1.57733	0.564913	2.2834	2.59987	2.1914	2.6884	2.13807	1.35386	18	35	9	52	42	67	72	36	34	14.0181	36.1555	12.5361	50.814	56.4299	47.8013	56.1304	48.9701	30.5449
BC003965	2548.71	-0.251684	0.092349	-2.72536	0.00642312	0.143807	ENSMUSG00000067722	36.1177	33.7165	36.4748	43.9126	44.2428	39.068	45.5224	42.5396	40.7959	2866	2163	1637	2888	2064	3415	3452	2086	2940	2247.21	2215.71	2320.55	2801.63	2753.08	2443.2	2724.89	2793.33	2638.77
Rps6ka5	198.085	0.751381	0.275757	2.72479	0.00643415	0.143825	ENSMUSG00000021180	2.61409	3.23391	2.19746	1.20086	2.45072	1.41686	1.49233	1.12684	2.04648	309	323	185	95	160	214	199	96	234	256.97	335.766	220.88	121.046	240.94	139.992	141.133	116.904	209.137
Ubqln4	6192.16	-0.375071	0.13774	-2.72303	0.00646853	0.144137	ENSMUSG00000008604	91.9286	69.5787	74.0771	106.524	126.376	89.1773	110.834	94.6893	90.3492	7520	4598	3490	7226	6040	7802	8748	4853	6812	5909.67	4724.28	4869.37	7021.94	8125.15	5762.11	6854.67	6424.21	6038.08
Serac1	81.273	0.928907	0.341071	2.7235	0.00645949	0.144137	ENSMUSG00000015659	1.74455	1.68842	1.32088	0.775304	0.711112	1.51244	0.726645	0.550681	0.767035	136	99	66	63	44	149	73	36	74	127.791	130.631	98.9359	58.2425	52.0963	111.256	51.2081	42.5719	58.7251
Dennd6b	1161.43	-0.437718	0.161063	-2.71768	0.0065741	0.146151	ENSMUSG00000015377	13.1362	17.7622	16.4897	19.5798	26.9993	23.9536	21.0107	18.2934	20.5148	1012	1090	679	1267	1068	1987	1463	828	1338	759.627	1084.87	975.034	1161.02	1561.48	1392.25	1168.89	1116.43	1233.28
Clspn	17.1458	2.02775	0.746208	2.7174	0.00657964	0.146151	ENSMUSG00000042489	0.741103	0.645063	0.119084	0.234434	0.221276	0.129196	0.055004	0.048176	0.082149	20	28	9	13	7	19	7	4	10	49.1898	45.2216	8.08214	15.9556	14.6887	8.61909	3.51228	3.37466	5.66838
Ighg3	292.294	0.541352	0.199258	2.71684	0.00659075	0.146168	ENSMUSG00000076615	9.97287	8.63967	11.9886	6.69871	7.00658	8.51895	5.44916	7.96161	6.67821	451	331	264	237	182	455	254	210	295	352.735	322.755	433.582	242.951	247.849	302.851	185.421	296.947	245.556
Anxa6	282.603	0.712458	0.262379	2.71538	0.00661991	0.146584	ENSMUSG00000018340	6.85322	10.3022	5.36532	5.52794	5.02599	2.95135	5.83032	4.52273	4.19269	432	519	190	287	185	205	351	176	241	337.653	536.107	270.301	279.278	247.657	146.154	276.356	235.17	214.749
Epsti1	142.376	0.831781	0.306467	2.71409	0.00664573	0.146925	ENSMUSG00000022014	3.4676	4.92564	7.93042	2.66963	1.99776	3.10458	3.29509	3.3823	3.97923	159	181	208	102	54	158	146	96	166	125.124	187.725	292.606	98.778	72.0953	112.597	114.388	128.804	149.27
Gm37352	31.7569	2.42634	0.894155	2.71356	0.00665641	0.146931	ENSMUSG00000103593	0.508967	4.07548	0.032066	0.154171	0.280362	0.480399	0.114328	0.296153	0.441559	28	180	1	7	9	29	6	10	22	21.8776	185.028	1.40937	6.79534	12.0527	20.7552	4.72787	13.4348	19.7315
Ighv1-54	37.3348	1.17347	0.432691	2.71203	0.00668727	0.147381	ENSMUSG00000094787	16.4181	13.6671	14.1581	7.66022	2.44743	8.01603	6.55422	4.56727	9.83847	84	53	44	30	7	45	34	14	44	64.8688	57.0345	57.2	31.0351	9.67111	31.8337	24.9135	19.0448	40.4112
Ezr	10082.7	0.349968	0.129133	2.71014	0.00672548	0.147992	ENSMUSG00000052397	178.741	179.908	177.043	144.979	116.437	140.714	142.039	137.569	167.644	14645	11920	8228	9860	5568	12708	11095	6986	12496	11483.3	12207.9	11630.5	9550.92	7481.47	9086.42	8779.13	9327.6	11196.7
Scai	703.86	0.540765	0.199589	2.7094	0.00674056	0.148093	ENSMUSG00000035236	5.68748	9.93757	5.70753	4.61769	5.09727	5.33321	5.72426	4.6191	4.4508	894	881	605	620	424	911	1005	422	658	689.914	1273.22	707.944	574.379	618.395	650.248	668.029	591.342	561.275
Man1a	13572.7	0.327966	0.121157	2.70696	0.00679023	0.148952	ENSMUSG00000003746	155.461	132.927	175.827	125.717	117.929	109.63	146.138	119.291	129.134	19762	13368	12901	13191	8486	14869	17680	9449	15109	15396.2	13904.5	17805.6	12767	11680.7	10912.9	13923.8	12468.4	13295.3
Kansl2	6989.46	-0.411905	0.152405	-2.70269	0.00687804	0.150411	ENSMUSG00000022992	141.812	106.778	134.555	191.43	196.78	146.655	205.13	156.95	134.75	7939	4857	4224	8791	6473	9016	10877	5428	6919	6213.18	4941.32	6027.83	8600.34	8622.82	6458.53	8646.7	7256.95	6137.44
Gm53012	1031.54	-0.434915	0.160895	-2.70309	0.00686976	0.150411	ENSMUSG00000118504	19.4984	21.0662	18.7664	26.3035	35.6869	21.556	28.4345	24.1976	26.655	1088	894	592	1158	1012	1220	1487	761	1208	801.466	915.017	788.218	1108.96	1467.21	890.847	1124.23	1049.35	1138.55
Trpv2	140.111	0.897518	0.33246	2.69962	0.00694179	0.150847	ENSMUSG00000018507	2.22686	5.43422	2.53777	1.17584	1.9152	1.87081	1.85975	1.91472	2.41975	169	291	107	72	75	150	139	92	168	128.29	330.662	149.496	69.4617	110.349	108.329	103.075	116.416	144.921
Sdf2l1	2509.94	-0.333487	0.123553	-2.69914	0.0069519	0.150847	ENSMUSG00000022769	114.15	102.421	102.077	124.473	131.251	147.181	124.725	154.082	129.22	2880	2054	1475	2561	1917	4074	3029	2341	2935	2241.31	2124.03	2049.41	2506.1	2577.4	2904.64	2356.02	3192.89	2637.66
Herc6	128.175	0.885048	0.327766	2.70024	0.00692888	0.150847	ENSMUSG00000029798	1.76696	4.22312	2.91749	2.02298	1.50632	1.97044	2.09367	1.17513	1.12503	112	216	98	122	67	198	95	92	129	105.761	268.65	179.357	124.716	90.0328	119.075	121.099	74.5631	70.3167
Akap9	3266.54	-0.560333	0.207635	-2.69865	0.00696215	0.150847	ENSMUSG00000040407	43.8806	41.2358	46.8319	55.3946	98.4827	46.4723	82.1989	55.582	57.1946	3990	2881	1894	3461	3007	4166	4958	2034	3191	2413.4	2395.59	2633.39	3124.35	5417.68	2568.8	4349.32	3226.07	3270.23
Coa7	1265.51	-0.385706	0.142894	-2.69924	0.00694973	0.150847	ENSMUSG00000048351	27.7344	20.1967	29.1437	32.4445	36.4024	39.3211	34.6532	29.9664	30.3605	1564	1080	801	1300	1049	2302	1390	875	1432	1109.96	853.721	1192.64	1331.46	1457.04	1581.72	1334.23	1265.7	1263.16
Sae1	8422.05	-0.461507	0.170861	-2.70107	0.00691172	0.150847	ENSMUSG00000052833	221.571	159.391	190.449	298.274	312.568	183.106	302.113	251.315	242.384	9780	5570	4930	10910	7979	8894	12876	6748	9596	7651.26	5813.43	6724.75	10561.7	10794.9	6355.34	10036.7	9158.95	8701.34
Serf1	385.459	-0.617916	0.229275	-2.69509	0.00703698	0.151539	ENSMUSG00000021643	43.0909	19.3401	34.5572	59.4889	49.639	40.166	53.8877	51.0028	45.6063	481	168	226	525	315	492	591	331	450	370.899	176.102	304.147	525.397	427.324	347.541	446.309	463.308	408.1
Sp3	2469.65	0.304716	0.113028	2.69592	0.00701941	0.151539	ENSMUSG00000027109	38.9104	35.6675	39.0777	28.5018	26.6789	33.7615	34.2598	31.9309	30.8702	3631	2640	2155	2311	1303	3334	2919	1959	2690	2834.31	2744.12	2910.63	2128.89	1943.58	2471.83	2400.86	2454.96	2337.67
Gins3	336.075	-0.449552	0.166765	-2.69571	0.00702384	0.151539	ENSMUSG00000031669	6.13895	5.19961	6.03434	8.53733	9.27974	7.95166	8.12393	8.10299	6.08093	372	251	220	404	298	458	475	268	329	279.149	249.724	280.574	398.073	422.018	363.425	355.392	388.86	287.458
Gm42856	222.086	-0.923384	0.342618	-2.69508	0.00703708	0.151539	ENSMUSG00000106946	2.47153	2.86944	1.68059	3.67627	8.31742	3.81156	5.89057	2.99684	2.63564	182	170	70	224	358	308	413	136	176	142.324	174.525	98.9579	217.079	479.02	220.612	326.34	182.131	157.783
Pisd-ps2	20.2525	2.21214	0.82138	2.6932	0.00707705	0.151936	ENSMUSG00000023795	0.830562	4.05782	0.116413	0.339311	0.406381	0.570556	0.488072	0.15841	0.275285	26	110	2	8	8	20	15	3	7	20.1993	104.436	2.89895	8.47101	9.88476	13.9608	11.3951	4.06888	6.95803
Smco4	128.943	0.846672	0.314355	2.69336	0.00707356	0.151936	ENSMUSG00000058173	14.0085	11.1178	11.6275	5.02613	9.46337	3.52157	7.005	8.97907	7.49599	264	166	125	77	102	71	124	104	124	203.701	170.753	172.887	74.9433	137.626	51.4698	97.9962	137.796	113.316
Top2b	3445.69	0.475674	0.176771	2.69091	0.00712576	0.152322	ENSMUSG00000017485	44.5817	29.2774	48.6734	32.1301	25.956	24.2505	37.2447	26.8089	31.4557	5606	3318	3103	3494	1853	3612	4143	2564	3798	4527.24	3140.2	5054.11	3345.7	2636.14	2475.22	3638.66	2873.18	3320.76
Fam120c	182.482	0.794755	0.295449	2.68999	0.00714536	0.152322	ENSMUSG00000025262	2.03985	1.59046	2.84445	0.898434	1.26532	1.87889	1.57199	0.755666	1.17126	304	192	237	109	108	305	223	68	155	235.533	194.363	335.529	106.476	145.845	218.012	174.657	91.5945	140.327
Trf	8.63689	3.48964	1.29685	2.69086	0.0071269	0.152322	ENSMUSG00000032554	0.379057	1.68382	0.118869	0	0.20186	0.09689	0	0.102945	0	15	24	4	0	7	7	0	1	0	10.9658	51.4493	3.51626	0	5.84034	2.81728	0	3.14304	0
Shfl	1563.97	-0.346178	0.128699	-2.68982	0.00714905	0.152322	ENSMUSG00000038884	36.0913	31.5873	28.1141	37.1035	46.262	39.2586	44.7993	43.4059	36.0137	1912	1271	850	1690	1405	2300	2202	1324	1553	1458.06	1348.49	1162.24	1537.59	1869.75	1594.12	1741.63	1850.91	1512.92
Msantd1	19.524	-1.66852	0.620182	-2.69037	0.00713726	0.152322	ENSMUSG00000051246	0.277775	0.225957	0.319161	0.498317	1.79337	0.557162	1.36817	0.912112	0.38456	20	7	13	8	18	28	33	15	14	7.64318	6.5668	8.97981	14.0599	49.3521	15.4091	36.2178	26.4871	11.0004
Wdfy4	2960.28	0.580483	0.21588	2.68892	0.00716837	0.152503	ENSMUSG00000051506	25.6153	23.5499	24.2852	13.9985	10.1707	20.3555	14.4372	18.9243	21.0481	4525	3376	2725	2331	1201	4153	2818	2426	3610	3876.5	3764.23	3758.01	2172.3	1539.37	3096.25	2101.95	3022.49	3311.43
Ube2j2	4268.06	-0.332553	0.123762	-2.68704	0.00720892	0.153135	ENSMUSG00000023286	155.618	134.747	148.986	201.061	220.052	160.257	200.069	171.847	166.534	4884	3272	2699	5065	4076	5433	5918	3244	4639	3772.27	3450.47	3692.78	4997.57	5335.41	3904.56	4665.92	4396.36	4197.22
Lsm7	7088.93	-0.393987	0.146806	-2.68372	0.0072808	0.15443	ENSMUSG00000035215	981.823	776.016	977.379	1224.17	1415.31	902.886	1265.03	1235.67	1214.22	7905	4788	4709	7822	6584	8229	10382	5803	8649	6163.67	5145.37	6274.3	7880.42	8886.51	5697.43	7640.6	8186.86	7925.24
Gna13	2688.03	0.363213	0.135372	2.68307	0.00729505	0.154432	ENSMUSG00000020611	26.8169	33.5558	27.3893	23.8887	20.8559	24.9949	24.7654	24.3352	19.5933	3437	3574	1891	2799	1589	4118	3094	1923	2588	2813.32	3717.84	2937.86	2569.6	2188.04	2635.5	2499.31	2694.1	2136.7
Fas	290.844	0.792314	0.295373	2.68242	0.00730925	0.154432	ENSMUSG00000024778	10.1646	24.3578	14.2058	6.48208	10.2278	13.3999	8.43214	10.161	8.68737	319	608	244	176	170	444	239	188	265	244.932	619.932	350.025	160.166	246.487	324.544	195.477	258.404	217.625
Bcl7a	387.41	0.459388	0.171272	2.68221	0.00731375	0.154432	ENSMUSG00000029438	5.30626	4.04053	5.77782	3.80821	3.35334	3.10978	4.06542	4.17868	3.66287	626	381	374	369	232	411	444	307	388	486.934	391.623	542.153	358.345	307.76	286.831	358.912	404.694	349.434
Rb1	855.981	0.548786	0.204679	2.6812	0.00733587	0.154468	ENSMUSG00000022105	11.2649	12.8187	13.4869	7.75579	7.02767	11.3878	7.92632	6.59573	11.2527	1252	955	922	662	439	1272	834	482	1105	950.753	1142.77	1163.78	670.746	592.992	965.527	643.532	587.159	986.576
Zzef1	765.238	0.39381	0.146909	2.68065	0.00734803	0.154468	ENSMUSG00000055670	7.98589	8.1662	8.21505	5.13078	5.34639	6.91179	6.57723	6.5389	6.96809	1274	900	686	577	408	1019	843	566	881	872.473	942.315	917.73	574.792	584.174	758.987	691.309	753.945	791.415
Ndufs8	3928.12	-0.357459	0.133349	-2.68063	0.00734834	0.154468	ENSMUSG00000059734	283.866	230.322	247.503	316.496	369.928	299.177	283.759	355.195	343.577	4657	2967	2360	4184	3478	5386	4532	3437	5032	3609.31	3093.09	3217.86	4126.45	4704.14	3823.43	3471.04	4766.32	4541.47
Crim1	148.054	0.915899	0.341907	2.6788	0.00738866	0.154578	ENSMUSG00000024074	1.20587	2.6843	1.27622	0.808015	0.848446	1.55622	0.785855	0.691487	0.889267	194	304	98	108	80	262	120	69	130	146.106	343.514	158.113	100.389	102.812	189.519	91.603	88.4213	112.011
Gdap2	269.36	0.549085	0.204981	2.67871	0.00739065	0.154578	ENSMUSG00000027865	7.51618	10.0199	6.99832	6.21093	6.2267	4.3675	6.80375	4.80215	5.67302	379	335	217	297	202	234	308	175	277	304.942	429.37	290.328	258.389	252.656	178.101	265.564	205.618	239.274
Rnf43	10.8492	2.69385	1.00577	2.6784	0.00739738	0.154578	ENSMUSG00000034177	0.165026	0.347239	0.625205	0.077526	0	0.18193	0.064894	0.036815	0	14	26	35	6	0	9	5	2	0	10.4994	23.3339	40.6735	5.05776	0	11.634	3.97205	2.47198	0
B4galt3	1463.23	-0.401761	0.149989	-2.67861	0.00739288	0.154578	ENSMUSG00000052423	36.9512	34.0725	35.9739	44.6111	62.6914	40.745	50.206	47.5482	40.643	1746	1174	772	1447	1531	1926	1959	1210	1676	1216.9	1185.42	1210.99	1506.81	2064.98	1348.59	1591.1	1652.91	1391.41
Ddx5	30489	0.418132	0.156199	2.67692	0.00743013	0.15486	ENSMUSG00000020719	418.621	572.411	538.676	361.149	315.235	456.198	399.446	356.108	434.364	37506	39396	27578	26692	16253	45223	34462	19786	35230	29230.6	42215	38460.6	25858	22013.6	32017.2	26833.4	26242.5	31530.5
Med31	536.008	-0.406302	0.151786	-2.6768	0.00743283	0.15486	ENSMUSG00000020801	24.668	18.8372	21.4587	32.1594	29.5568	33.1138	25.9502	25.5237	27.5208	634	383	325	667	426	909	629	399	633	489.996	395.29	435.462	655.5	587.04	661.099	496.167	535.191	568.324
Banp	1386.66	-0.291735	0.109053	-2.67517	0.0074692	0.154931	ENSMUSG00000025316	29.7366	26.4152	28.853	33.5019	36.4802	32.9767	33.909	37.1381	36.2639	1591	1200	859	1445	1149	1890	1740	1118	1792	1234.39	1158.14	1224.7	1426.03	1514.51	1375.89	1354.18	1627.12	1564.94
Emc3	3314.42	-0.318468	0.119041	-2.67528	0.00746665	0.154931	ENSMUSG00000030286	82.6021	69.4521	71.2194	110.56	96.5452	89.2029	99.009	83.2579	84.7063	3978	2655	1954	4338	2620	4620	4559	2456	3684	3081.74	2736.77	2716.94	4229.64	3602.37	3345.02	3553.7	3278.21	3285.36
9430038I01Rik	1122.76	-0.330067	0.123341	-2.67604	0.00744971	0.154931	ENSMUSG00000040139	49.9093	47.0088	48.7375	69.7411	62.5276	65.8369	62.0091	59.3529	51.0743	1277	903	648	1410	896	1876	1471	896	1126	960.603	955.629	959.182	1376.42	1203.61	1273.64	1148.2	1205.62	1021.94
Pak1ip1	6577.39	-0.282106	0.105507	-2.67382	0.00749918	0.155324	ENSMUSG00000038683	170.137	151.018	183.916	220.852	214.299	201.4	233.164	192.123	181.297	7280	5105	4467	7768	5359	9470	9524	4982	7012	5669.37	5315.14	6266.62	7546.36	7141.83	6745.45	7474.78	6756.51	6280.43
Adrm1	8023.04	-0.363501	0.136011	-2.67257	0.0075272	0.155676	ENSMUSG00000039041	229.691	253.656	211.155	281.622	328.763	374.265	302.313	260.113	266.308	8251	7577	4266	8323	6995	14981	10226	5875	8802	6505.3	7588.08	6114.83	8178.54	9312.71	10654.6	8237.28	7775.13	7840.84
Ubash3a	31.0079	1.98515	0.743494	2.67002	0.00758466	0.156406	ENSMUSG00000042345	0.155038	2.57002	0.435655	0.338836	0.16119	0.208914	0.484041	0.202587	0.299886	32	243	7	7	7	43	30	10	10	8.61053	150.757	24.7406	19.2964	8.95327	11.662	25.8627	11.8743	17.3145
Hmgb2	2586.75	0.425386	0.159296	2.67041	0.00757591	0.156406	ENSMUSG00000054717	53.029	63.2348	61.6195	44.8188	36.2974	41.3632	42.712	54.9953	47.4319	3534	3349	2343	2308	1425	2817	2668	2218	2872	2712.52	3416.2	3223.75	2351.04	1856.8	2126.48	2102.3	2969.33	2522.35
Stau2	424.238	-0.565006	0.211693	-2.66899	0.00760799	0.156652	ENSMUSG00000025920	9.19204	6.04979	8.50932	12.223	14.7679	8.189	13.8311	12.1673	9.90114	545	293	257	497	396	518	652	322	379	364.61	253.457	345.134	497.158	585.853	326.484	527.806	509.351	408.285
Plxna1	160.341	1.03929	0.389608	2.66753	0.00764104	0.156652	ENSMUSG00000030084	2.21791	0.871371	0.921038	0.470626	0.424076	0.925216	0.391305	0.689028	0.986676	347	146	127	96	61	249	91	105	220	397.935	165.077	168.693	86.5586	76.0734	166.799	67.5231	130.431	183.981
Ppp1r21	341.325	0.719712	0.26976	2.66797	0.00763107	0.156652	ENSMUSG00000034709	9.54902	8.93197	11.3941	6.56843	4.98606	3.17866	6.60703	6.6143	8.60655	529	336	359	374	176	194	403	266	410	432.43	427.221	527.612	305.012	225.823	144.683	287.849	316.117	405.18
Smcr8	1567.48	0.725662	0.272022	2.66766	0.00763816	0.156652	ENSMUSG00000049323	11.5215	22.8576	9.75714	8.73289	6.36053	13.4827	9.21864	8.42417	8.2179	2134	2581	1024	1272	680	2774	1619	973	1393	1612.05	3378.58	1396.8	1253.3	890.134	1896.31	1240.7	1244.06	1195.43
Ints12	1063.8	-0.265075	0.0993907	-2.667	0.00765316	0.156673	ENSMUSG00000028016	15.5788	13.4259	14.4721	16.8661	17.4507	17.634	19.5508	17.4186	16.8083	1258	875	659	1128	826	1545	1500	866	1238	983.251	894.995	933.983	1091.55	1101.53	1118.66	1187.12	1160.25	1102.85
Cd81	9532.14	-0.454191	0.170358	-2.6661	0.0076737	0.156866	ENSMUSG00000037706	290.624	218.171	274.846	374.284	472.553	257.631	380.423	353.147	330.87	10631	6402	5731	11302	10060	10318	13349	7903	10984	8310.51	6589.31	8036.39	10974.8	13514.5	7404.74	10465.6	10657.6	9835.93
Fosb	38.3176	1.67647	0.628965	2.66544	0.00768884	0.156948	ENSMUSG00000003545	0.241321	1.84488	0.686019	0.194053	0.185243	0.330301	0.425089	0.528219	0.131374	24	146	36	16	10	36	38	25	11	17.6668	142.652	51.3542	14.5674	13.5631	24.3046	29.9394	40.8116	9.99851
Ighv8-8	48.4285	0.869593	0.326557	2.66291	0.00774678	0.157902	ENSMUSG00000104452	22.4365	15.1022	19.0785	13.5526	7.71413	8.84032	10.563	11.7446	10.1245	104	53	54	48	20	45	50	33	41	80.4747	57.2366	69.9721	49.8453	27.6723	31.9093	36.536	44.4581	37.7518
Bag5	3212.87	-0.419111	0.157691	-2.65779	0.00786538	0.160088	ENSMUSG00000049792	68.7686	53.8493	64.9555	102.111	97.5125	66.6394	93.5693	74.0103	73.4596	3615	2248	1941	4450	2967	3828	4715	2367	3488	2817.49	2330.24	2721.23	4289.85	3995.64	2744.22	3688.13	3200.15	3128.84
Hdac5	325.512	0.85094	0.320275	2.65691	0.00788616	0.160235	ENSMUSG00000008855	5.57794	16.1338	7.42952	3.78687	5.69833	5.37308	5.83028	4.62101	7.66731	366	580	241	187	182	414	266	229	397	256.715	784.263	349.634	178.713	262.288	248.551	258.147	224.451	366.845
Rbm4b	1920.78	-0.412918	0.155436	-2.65651	0.00789532	0.160235	ENSMUSG00000033760	29.018	29.6963	23.4165	38.1076	42.8946	40.5864	42.0437	29.5475	29.1222	2015	1942	1047	2228	1711	3239	2819	1203	1781	1623.63	1754.8	1340.01	2185.86	2400.26	2281.75	2262.35	1744.6	1693.73
Pex14	1346.76	-0.379301	0.142817	-2.65585	0.00791083	0.160268	ENSMUSG00000028975	30.0027	27.1297	28.8611	39.3384	40.9497	29.9185	44.4691	39.5531	32.3562	1475	1055	803	1554	1170	1590	2089	1191	1443	1144.28	1093.36	1126.35	1538.71	1563.09	1147.11	1631.9	1592.45	1283.62
Cep350	1041.43	0.481243	0.18126	2.65499	0.00793104	0.160268	ENSMUSG00000033671	5.33877	6.00876	5.13844	3.94042	3.23727	5.56225	3.51945	3.59504	4.03904	1570	1044	868	923	598	1649	1080	708	1161	1214.93	1444.25	1195.69	919.498	736.786	1272.26	770.523	863.416	955.543
Cables2	2873.71	-0.284538	0.107166	-2.6551	0.00792852	0.160268	ENSMUSG00000038990	43.847	34.5338	41.3872	48.6432	55.3183	47.7784	51.9644	44.0411	47.229	3414	2212	1800	3190	2564	4123	3925	2110	3328	2690.84	2238.42	2597.12	3061.04	3395.25	2947.1	3068	2852.42	3013.17
Ryr3	3.65633	4.24681	1.60008	2.65413	0.0079513	0.160448	ENSMUSG00000057378	0.178624	0.339068	0.446704	0	0	0	0.005056	0	0.103351	6	4	3	0	0	0	2	0	3	5.28808	10.6601	13.6247	0	0	0	0.143827	0	3.19026
Kif1b	242.703	0.767934	0.289393	2.6536	0.00796371	0.160469	ENSMUSG00000063077	2.91475	2.1376	1.51108	0.719113	0.980902	1.64318	1.53082	1.33404	1.57103	445	390	191	123	100	368	288	139	257	436.037	337.749	231.145	110.311	146.757	247.071	220.316	210.619	244.325
Wwp2	3782.65	-0.393478	0.148319	-2.65293	0.00797973	0.160562	ENSMUSG00000031930	51.0727	52.0264	45.0683	66.4112	80.1735	59.5553	76.7646	49.0642	63.4107	4302	3107	2116	4137	3544	5507	5175	2638	4427	3150.97	3390.21	2843.17	4201.4	4946.96	3693.09	4556.34	3194.67	4067.04
Vdac3	5446.97	-0.300249	0.113239	-2.65147	0.00801423	0.160569	ENSMUSG00000008892	206.694	148.205	192.252	237.954	218.923	228.359	246.794	211.306	217.17	6666	3877	3524	6312	4128	8182	7721	4139	6357	5226.96	3958.83	4972.03	6170.45	5536.81	5804.41	6004.08	5640.11	5709.08
Milr1	194.557	0.879452	0.331655	2.65171	0.00800855	0.160569	ENSMUSG00000040528	6.28116	18.7449	7.77727	4.92609	7.91383	6.70515	6.33741	5.7642	4.95074	198	478	143	125	138	244	190	114	138	154.766	487.828	195.947	124.462	195.018	166.058	150.227	149.893	126.814
2900089D17Rik	56.4077	1.12138	0.422822	2.65213	0.00799855	0.160569	ENSMUSG00000087484	2.04218	5.42509	2.91474	1.81986	1.05705	1.38804	2.35647	1.08093	2.13698	52	94	29	55	39	55	45	42	56	50.0836	140.526	73.0933	45.7655	25.9269	34.2151	55.5985	27.9773	54.4833
Crtc1	1001.16	-0.393997	0.148659	-2.65033	0.00804122	0.160881	ENSMUSG00000003575	9.17003	7.82871	6.49068	8.51843	11.6662	10.3351	12.0786	10.2764	9.77148	1249	803	507	994	863	1645	1279	852	1137	944.405	851.58	683.524	899.592	1201.62	1069.83	1196.76	1116.95	1046.19
Caprin1	21270.8	0.258433	0.0975355	2.64962	0.00805812	0.160991	ENSMUSG00000027184	298.276	292.41	302.267	285.522	234.174	251.352	257.332	239.665	242.108	30146	21469	17518	23886	13780	27055	24656	15295	22331	23325.5	24152	24170.2	22895.6	18314.9	19756.5	19360.1	19779.9	19682.7
Shisa5	3394.47	0.587551	0.221789	2.64915	0.00806956	0.160992	ENSMUSG00000025647	134.634	197.433	186.134	87.0715	105.687	99.7726	101.426	135.446	167.599	4168	5090	3197	2212	1928	3453	3275	2622	4672	3307.64	5123.06	4675.9	2193.5	2596.8	2463.71	2397.25	3511.85	4280.51
Zpr1	6101.76	-0.370348	0.139882	-2.64758	0.00810698	0.16151	ENSMUSG00000032078	124.3	97.6118	116.909	149.364	181.563	125.085	169.688	128.585	132.427	7082	4340	3723	7112	5898	7890	8562	4674	6861	5487.02	4551.09	5277.04	6760.96	8015.8	5549.91	7206.37	5990.46	6077.2
Herc3	330.648	0.697677	0.263628	2.64645	0.00813421	0.161824	ENSMUSG00000029804	6.19936	3.3357	6.63878	2.88381	2.07942	3.24999	4.63009	3.64308	3.58117	629	277	391	250	127	360	381	265	354	500.814	284.62	548.396	238.889	168.006	263.893	359.849	310.603	300.758
Atp23	632.237	-0.364714	0.137979	-2.64326	0.00821126	0.16244	ENSMUSG00000025436	30.2171	23.1404	26.5912	34.3573	40.6352	30.6131	37.1483	32.3295	33.4241	790	451	415	711	576	822	881	455	736	586.635	474.497	527.872	683.963	788.988	597.361	693.832	662.399	674.585
Trip12	4257.75	0.600132	0.226981	2.64397	0.00819388	0.16244	ENSMUSG00000026219	57.3374	103.437	52.9871	44.9927	35.364	62.7827	52.2262	47.0331	44.9167	6037	6193	3180	3765	1969	6293	4330	3051	4096	4291.7	8177.41	4055.43	3453.28	2647.31	4723.31	3760.8	3715.36	3495.11
Traf2	2887.3	-0.374913	0.141827	-2.64345	0.00820665	0.16244	ENSMUSG00000026942	53.4809	43.1185	51.261	64.647	82.0803	54.8441	70.4514	58.7125	57.3564	3235	2179	1734	3266	2933	3731	4009	2203	3202	2553.2	2174.19	2502.36	3164.71	3919.03	2631.67	3235.76	2958.17	2846.62
Fkbp2	1030.37	-0.38222	0.144569	-2.64387	0.00819646	0.16244	ENSMUSG00000056629	81.7495	79.4253	88.561	93.905	108.068	117.831	97.8924	127.681	111.69	1066	812	665	963	802	1693	1234	966	1298	820.403	841.878	908.785	966.34	1084.66	1188.55	945.131	1352.3	1165.25
Gtpbp8	910.566	-0.399233	0.151136	-2.64154	0.008253	0.163037	ENSMUSG00000022668	16.2899	12.3507	18.4016	22.1	24.3866	19.1381	22.2424	19.0233	18.429	1054	706	634	952	711	1563	1060	667	1070	762.317	610.632	881.13	1060.57	1141.42	900.803	1001.47	939.531	897.212
Srsf7	30256.6	-0.289804	0.109783	-2.6398	0.00829549	0.163571	ENSMUSG00000024097	910.255	862.559	906.432	1235.32	1203.24	1039.14	1195.9	1031.26	928.935	33713	24999	19532	37751	25852	41408	42693	22726	30894	26181.8	26204.3	26659.2	36434.7	34613.3	30041.7	33092.7	31304.7	27776.9
Msi2	1001.91	0.327011	0.123892	2.63948	0.00830322	0.163571	ENSMUSG00000069769	10.7388	11.949	11.5501	9.97666	9.14765	10.1207	8.4818	8.4173	9.07096	1433	1092	961	972	632	1338	1027	674	1100	1061.83	1247.9	1167.78	1011.54	904.614	1005.83	806.843	878.375	932.429
Gpr137b	48.7176	1.25121	0.474512	2.63684	0.00836815	0.164261	ENSMUSG00000021306	1.06757	1.85242	2.47085	0.416723	0.458897	0.475877	0.914863	1.0314	1.24815	76	91	52	16	20	42	23	41	68	45.9078	83.8001	109.359	18.2123	19.5896	20.6113	38.1815	47.1649	55.6321
Sec13	4900.95	-0.319249	0.121082	-2.63664	0.00837319	0.164261	ENSMUSG00000030298	191.481	158.937	173.61	237.106	250.384	184.02	225.682	216.041	208.304	5802	3782	3038	5761	4312	6087	6533	4018	5688	4499.58	3944.74	4171.55	5713.32	5884.45	4346.37	5102.04	5357.84	5088.69
Dnal1	6.96632	2.9553	1.12071	2.63698	0.00836471	0.164261	ENSMUSG00000042523	0.454797	0.113039	0.23323	0.062765	0.011121	0	0.106158	0	0.035864	7	14	9	8	1	0	3	0	5	27.7494	7.28469	14.5511	3.92691	0.678625	0	6.23139	0	2.27485
Abhd16a	938.82	-0.404911	0.15368	-2.63478	0.00841927	0.164585	ENSMUSG00000007036	23.5623	22.4513	23.1849	27.5425	36.9403	23.9894	33.5482	33.5679	30.0144	1024	748	548	913	842	1152	1383	888	1083	768.122	773.039	772.847	920.692	1204.39	786.045	1052.16	1154.89	1017.19
Hgh1	2218.75	-0.353186	0.134029	-2.63514	0.00841032	0.164585	ENSMUSG00000022554	53.6753	44.1274	51.0898	63.4209	76.488	52.2114	63.9187	63.3118	65.0101	2544	1646	1377	2505	2032	2711	2856	1876	2760	1975.99	1715.79	1923.18	2394.09	2816.15	1931.92	2263.8	2459.8	2488.01
Anxa1	34.9717	1.48492	0.563633	2.63456	0.00842468	0.164585	ENSMUSG00000024659	1.12358	3.64743	0.945095	1.06913	0.629341	0.578782	1.09811	0.290573	0.513324	46	95	22	36	15	26	43	7	19	34.8532	119.501	29.9771	34.007	19.5243	18.0454	32.7707	9.5126	16.5535
Thap11	939.541	-0.493799	0.187535	-2.6331	0.00846093	0.165064	ENSMUSG00000036442	24.3076	16.0691	21.3001	29.2216	37.4445	21.4637	33.4666	28.727	25.2967	1093	579	544	1082	981	1059	1438	790	1029	853.37	595.847	764.633	1051.95	1314.73	757.382	1130.33	1064.36	923.253
Gpt2	599.346	-0.490888	0.186573	-2.63108	0.00851147	0.165364	ENSMUSG00000031700	6.50375	7.30548	4.62724	8.62999	9.51198	10.6048	9.68041	7.16904	7.16583	621	561	249	683	528	1110	878	423	621	485.218	575.664	352.997	660.21	709.736	795.229	694.812	564.47	555.778
Hook2	1157.02	-0.376462	0.143081	-2.6311	0.00851082	0.165364	ENSMUSG00000052566	19.8343	20.7695	19.5866	28.0551	32.1655	21.608	28.6087	23.7406	24.3354	1233	952	670	1324	1187	1386	1645	897	1311	928.961	1027.44	938.028	1347.39	1506.69	1017.21	1289.08	1173.49	1184.9
Lrch1	675.088	0.467365	0.177581	2.63184	0.00849229	0.165364	ENSMUSG00000068015	8.93207	13.016	9.54916	6.79531	7.33277	6.70192	8.44553	8.02623	8.9343	879	980	552	551	401	730	774	470	854	683.791	1052.43	747.502	533.432	561.426	515.687	622.012	648.469	711.04
Gga1	1233.07	-0.323517	0.123112	-2.62782	0.00859337	0.166726	ENSMUSG00000033128	19.9604	15.2952	18.4415	19.5476	24.5147	23.3305	22.6651	22.2952	23.3882	1521	909	757	1214	1052	1847	1542	1007	1594	1149.93	930.683	1086.36	1154.76	1412.47	1350.95	1256.2	1355.56	1400.75
Sun1	1427.46	-0.439397	0.167262	-2.62699	0.00861435	0.166903	ENSMUSG00000036817	17.7244	14.5287	15.2454	25.0807	25.3116	17.3063	26.3792	19.2158	17.2922	1655	996	825	1873	1348	1758	2209	1075	1437	1260	1090.87	1108.19	1828.25	1799.58	1236.57	1804.1	1441.66	1277.94
Taf15	215.275	1.08127	0.411678	2.6265	0.00862674	0.166914	ENSMUSG00000020680	13.6446	26.6087	6.06884	5.40337	9.10636	10.2403	8.02551	8.75096	3.37012	398	528	107	108	130	293	166	133	108	283.177	583.269	128.789	114.99	189.015	213.611	160.24	191.672	72.7119
Tmem115	1090.11	-0.359503	0.13696	-2.62489	0.00866779	0.167478	ENSMUSG00000010045	24.5602	19.0739	18.3505	26.6054	31.0399	24.3242	27.1478	27.5952	24.3061	1360	848	576	1216	1003	1478	1434	938	1219	1062.65	871.658	811.863	1180.4	1343.17	1057.82	1130.04	1260.08	1093.29
Mrpl38	2651.22	-0.296106	0.112855	-2.62377	0.00869616	0.167797	ENSMUSG00000020775	96.9585	106.23	90.5066	117.115	137.392	118.118	116.73	117.214	124.08	2849	2412	1538	2810	2402	3775	3197	2085	3382	2218.31	2567.03	2117.35	2747.55	3143.76	2716.23	2569.32	2830.22	2951.2
Hyal2	965.509	-0.442299	0.168712	-2.62163	0.0087511	0.168291	ENSMUSG00000010047	22.0289	17.5456	22.9746	28.4453	34.936	21.258	33.4651	27.8982	25.9063	1056	673	535	1128	989	1078	1542	814	1067	803.962	676.33	857.366	1064.52	1275.17	779.794	1174.99	1074.55	982.9
B230317F23Rik	90.0101	-1.17834	0.449565	-2.62107	0.00876548	0.168291	ENSMUSG00000045746	1.48992	1.02552	0.363892	2.07143	3.22964	2.8311	2.89388	0.901982	1.48664	94	52	13	108	119	196	174	35	85	73.4776	53.4178	18.3502	104.752	159.294	140.334	137.301	46.9458	76.2186
Zfp516	192.769	0.779984	0.297593	2.62097	0.0087679	0.168291	ENSMUSG00000058881	1.27227	2.20499	1.33827	0.86613	0.704112	1.48932	0.70351	0.950911	0.971786	265	371	157	150	86	309	139	123	184	205.339	375.877	220.857	143.342	113.654	241.599	109.235	161.971	163.051
Stat4	1021.39	0.735597	0.280665	2.62091	0.0087695	0.168291	ENSMUSG00000062939	19.4471	46.6594	19.0371	23.0005	17.1135	13.4376	20.5281	14.4504	16.0374	1195	1704	638	1145	713	911	1142	624	890	921.037	2334.42	921.936	1117.31	810.615	639.676	935.572	722.288	789.623
Cct5	43551.8	-0.272383	0.104017	-2.61864	0.00882798	0.168953	ENSMUSG00000022234	1080.96	1045.59	1062.09	1401.49	1433.66	1140.64	1359.85	1276.84	1182.43	48811	37174	27247	51945	37369	55936	58454	35244	48272	37919	38739.8	38096.7	50412.5	50297.8	40217.3	45892.2	47270.5	43120.9
Mrpl27	984.133	-0.376569	0.143799	-2.61871	0.00882623	0.168953	ENSMUSG00000024414	74.7573	70.7909	57.3935	85.1236	100.803	82.7746	82.7445	98.6683	83.804	1141	845	504	1047	875	1389	1229	879	1155	882.688	882.523	692.712	1030.25	1189.95	981.994	939.63	1229.09	1028.36
Slc1a5	32988.5	-0.44401	0.1697	-2.61645	0.00888504	0.168958	ENSMUSG00000001918	570.387	504.682	489.776	730.486	938.782	603.327	904.076	586.252	559.894	36229	25879	17859	37998	34437	41348	54550	23229	33012	28370.2	26512.9	24909.6	37256.5	46699.3	30162	43261.1	30774	28950.8
Rrnad1	1010.51	-0.306416	0.117048	-2.61787	0.00884815	0.168958	ENSMUSG00000004896	17.6623	15.0459	17.6058	20.8943	22.3138	18.1795	22.9232	20.486	20.9742	1071	896	629	1055	878	1294	1475	821	1179	897.221	806.926	914.497	1088.34	1133.41	928.228	1119.9	1098.53	1107.56
Unc5a	3.89026	3.37727	1.29269	2.61259	0.00898593	0.168958	ENSMUSG00000025876	0.029791	0.284829	0.268457	0.011977	0.016966	0.036197	0.020892	0	0.01094	3	3	3	1	1	4	2	0	1	1.48533	14.9993	13.6864	0.612332	0.846021	1.81393	1.0021	0	0.567023
Mrpl53	1036.29	-0.290646	0.111219	-2.61329	0.00896762	0.168958	ENSMUSG00000030037	87.7455	81.5183	77.1983	101.178	107.505	101.833	96.7159	106.773	96.6681	1212	884	620	1119	849	1545	1303	863	1191	938.087	920.451	843.886	1108.75	1148.99	1093.86	994.114	1204.43	1074.04
Thoc5	2154.7	-0.291797	0.111705	-2.61221	0.00899594	0.168958	ENSMUSG00000034274	44.4982	36.7179	46.6158	54.2156	56.5078	48.1383	55.2187	53.1822	48.9084	2437	1646	1450	2482	1801	2899	2935	1731	2461	1911.1	1665.58	2047.15	2387.61	2427.18	2078	2281.53	2410.53	2183.66
Tle6	86.8509	-0.850595	0.325495	-2.61324	0.00896883	0.168958	ENSMUSG00000034758	4.04328	1.46594	3.24283	5.45803	5.19824	5.90838	4.22177	5.05318	5.21315	79	53	38	108	72	170	72	94	111	78.1214	29.9157	64.0672	108.136	100.449	114.741	78.4749	103.04	104.712
Aagab	1268.65	-0.425398	0.162714	-2.61439	0.00893858	0.168958	ENSMUSG00000037257	12.6238	8.83579	11.715	16.1667	16.3264	13.2223	19.2201	12.377	12.9166	1581	839	783	1583	1086	1579	1732	1010	1466	1152.06	851.687	1093.21	1512.89	1490.15	1212.85	1687.49	1192.08	1225.45
Snx25	677.387	0.452009	0.172777	2.61614	0.00889298	0.168958	ENSMUSG00000038291	11.0713	15.1289	17.5922	10.2328	10.068	9.83046	11.6306	10.6845	12.2377	899	634	600	679	463	693	884	532	711	609.888	880.254	990.94	578.022	554.686	544.303	616.389	621.172	700.831
Mdc1	1126.25	0.413495	0.158272	2.61256	0.00898671	0.168958	ENSMUSG00000061607	10.6228	7.35135	10.2294	6.75295	7.58514	7.9229	5.9688	6.56111	7.86179	1851	1139	1025	1112	651	1558	1082	713	1328	1492.16	1090.66	1469.27	972.675	1065.59	1118.6	806.608	972.656	1148.04
Mtx1	1624.42	-0.367557	0.14045	-2.617	0.00887075	0.168958	ENSMUSG00000064068	119.183	96.4344	114.473	128.724	173.305	122.094	153.53	129.171	154.518	1864	1246	954	1685	1486	2206	2054	1356	2065	1438.76	1229.52	1413.67	1594.27	2092.96	1481.86	1783.35	1645.54	1939.88
Psma5	11531.1	-0.33605	0.128605	-2.61305	0.00897387	0.168958	ENSMUSG00000068749	473.696	385.646	419.19	530.725	539.634	682.104	513.375	516.796	478.635	13669	8869	6914	12528	9029	21603	14235	9024	12451	10649.8	9157.34	9637.06	12234.8	12133.2	15413.9	11104.2	12262.7	11187.2
Igkv4-91	54.2402	1.05983	0.404912	2.61744	0.00885917	0.168958	ENSMUSG00000076532	33.2233	9.97733	25.0847	12.4232	8.48554	7.67096	14.188	10.6769	12.3469	154	35	71	44	22	39	67	30	50	119.164	37.7978	92.0003	45.6915	30.4395	27.6547	48.9583	40.4165	46.0388
Gm15728	6.89429	3.25236	1.2443	2.61381	0.00895397	0.168958	ENSMUSG00000086075	0.043762	0.461788	0.289029	0.013203	0	0.109668	0.011504	0	0.024112	4	34	6	1	0	11	1	0	2	2.7513	30.6641	18.5804	0.851151	0	6.93	0.695783	0	1.5759
Gm9856	463.416	-0.50601	0.193667	-2.61278	0.00898082	0.168958	ENSMUSG00000110945	7.30118	6.90304	6.31096	10.9338	9.0706	13.0559	9.96431	9.02582	6.95738	482	366	236	597	350	946	627	367	416	376.817	375.905	333.283	578.892	468.452	677.41	494.968	492.019	372.997
Keap1	1368	-0.311201	0.11931	-2.60833	0.00909863	0.16992	ENSMUSG00000003308	19.9689	15.9413	18.5626	19.8733	23.7421	25.7776	22.9698	21.7642	22.4384	1539	1062	870	1351	1121	2351	1769	1079	1621	1265.78	1067.38	1203.31	1291.99	1505.59	1642.46	1400.75	1455.85	1478.9
Mcfd2	2061.78	-0.354831	0.136129	-2.60657	0.00914537	0.16992	ENSMUSG00000024150	50.2639	46.7287	47.0915	70.9545	65.2642	51.8239	73.5468	59.0748	52.7607	2255	1686	1253	2659	1680	2620	3190	1564	2181	1773.72	1741.65	1699.21	2567.49	2303.34	1838.12	2496.86	2200.08	1935.54
Pdcd4	616.24	0.339668	0.130165	2.60952	0.009067	0.16992	ENSMUSG00000024975	16.4352	12.7157	16.4771	11.9382	12.212	12.4379	11.9732	11.1629	12.9962	965	605	553	571	423	810	673	397	701	756.568	618.245	775.585	563.521	562.23	575.488	530.255	542.322	621.946
Aldoa	23857.5	-0.336869	0.129255	-2.60623	0.0091544	0.16992	ENSMUSG00000030695	768.408	602.357	757.001	811.346	890.773	1078.72	832.425	852.156	958.037	27553	17264	15544	23955	18576	41706	28577	18583	31172	21477.8	17782.8	21635.7	23254.3	24901.1	30305.6	22384.3	25137.6	27838.3
Secisbp2l	1152.69	0.380775	0.146054	2.60709	0.00913151	0.16992	ENSMUSG00000035093	10.5068	8.97325	9.90126	8.62495	5.98548	8.1465	8.97476	6.71296	7.18179	1832	1188	1006	1232	610	1568	1476	708	1174	1428.34	1288.42	1376.34	1202.31	813.791	1113.13	1173.77	963.122	1014.98
Kcnh4	815.396	-0.530525	0.203325	-2.60924	0.00907424	0.16992	ENSMUSG00000035355	10.3397	8.43083	4.9067	12.4219	12.9914	10.2116	12.2248	11.2604	10.2728	1026	676	274	1019	754	1112	1152	690	925	802.263	690.921	389.293	988.319	1008.14	796.374	912.544	922.081	828.631
Rpp38	1900.52	-0.416929	0.159977	-2.60619	0.00915555	0.16992	ENSMUSG00000049950	91.8883	70.1078	88.0746	130.306	136.813	88.6261	108.465	108.321	101.684	2150	1302	1182	2482	1851	2275	2446	1522	2140	1672.22	1347.56	1638.93	2431.62	2490.08	1621.1	1898.98	2080.43	1923.75
Tarbp1	1709.86	0.348274	0.13362	2.60646	0.00914845	0.16992	ENSMUSG00000090290	14.9787	12.7063	15.7878	12.8789	9.50197	10.8883	12.5982	11.9724	11.0968	2571	1761	1527	1837	956	2051	2052	1275	1731	2013.36	1803.97	2169.85	1775.13	1277.33	1471.06	1629.04	1698.34	1550.67
Gm19684	22.0278	2.26608	0.869073	2.60747	0.00912151	0.16992	ENSMUSG00000092277	0.255155	3.66736	0.448522	0.186253	0.350766	0.743718	0.293313	0.251047	0.056462	10	115	10	6	8	32	11	6	2	7.80287	118.454	14.0252	5.84051	10.728	22.8727	8.62941	8.10234	1.79502
Fam32a	2847.08	-0.240258	0.092533	-2.59646	0.00941911	0.171014	ENSMUSG00000003039	48.1052	44.1154	49.3692	59.109	59.1826	53.5969	59.6245	55.1835	51.6583	3202	2434	1871	3284	2343	3984	3794	2251	3109	2525.32	2445.77	2649.78	3181.49	3106.88	2827.69	3010.94	3056.98	2818.9
Ppp5c	5057.86	-0.358612	0.137859	-2.60129	0.00928745	0.171014	ENSMUSG00000003099	131.586	109.02	125.692	157.734	202.02	135.213	166.006	151.256	138.082	5885	3848	3206	5591	4826	6271	6965	4147	5453	4477.3	3917.96	4373.11	5503.4	6874.7	4624.22	5434.14	5431.56	4884.32
Tfpt	596.813	-0.331975	0.127903	-2.59552	0.00944488	0.171014	ENSMUSG00000006335	25.8478	25.2172	27.2367	32.7027	37.5462	31.6083	32.3933	35.1021	30.19	632	497	386	669	514	856	775	515	628	490.966	505.91	529.004	636.958	713.259	603.455	591.95	703.667	596.148
Ppp1r12a	2737.88	0.321954	0.123759	2.60145	0.00928303	0.171014	ENSMUSG00000019907	41.3197	45.4772	48.6173	31.7177	32.7022	39.4965	38.9264	37.7388	38.6261	3698	2788	2394	2387	1659	3792	3347	1980	3233	2817.05	3274.75	3389.24	2217.36	2229.8	2706.51	2553.18	2715.38	2737.65
Cyc1	6350.52	-0.317647	0.122252	-2.59831	0.00936849	0.171014	ENSMUSG00000022551	282.985	215.886	259.606	301.436	365.686	272.773	340.39	317.93	311.524	7417	4535	4040	6764	5716	8287	8455	5547	7579	5963.13	4804.89	5593.73	6513.36	7706.77	5777.33	6900.62	7070.47	6824.41
Fen1	3304.76	-0.378453	0.145694	-2.59759	0.00938797	0.171014	ENSMUSG00000024742	68.3307	55.7228	60.8915	91.0889	95.7057	62.8175	86.5111	76.9621	73.0871	3797	2518	1912	4136	3139	3878	4583	2641	3712	2979.14	2565.81	2714.67	4072.44	4173.67	2753.05	3629.42	3541.23	3313.44
Elk4	2033.97	0.346281	0.133143	2.60083	0.00929994	0.171014	ENSMUSG00000026436	48.8525	47.84	58.4122	37.3386	35.8096	45.0215	40.3278	42.4609	45.3078	2882	2359	1791	1715	1141	2918	2200	1508	2332	2185.55	2260.54	2672.11	1712.9	1602.24	2024.46	1735.72	2005.02	2107.22
Ndufaf1	1177.97	-0.296513	0.114178	-2.59693	0.00940618	0.171014	ENSMUSG00000027305	45.9092	38.0157	39.6943	55.1337	54.8656	47.1282	55.144	46.2157	48.8817	1388	965	723	1372	983	1614	1656	859	1373	1111.05	971.728	982.286	1368.2	1327.97	1146.38	1283.91	1180.4	1229.82
Abraxas2	2371.85	-0.297818	0.114515	-2.60069	0.00930374	0.171014	ENSMUSG00000030965	39.4042	36.707	38.3842	50.2195	50.5636	45.7709	55.4138	43.8771	39.3952	2737	2008	1477	2813	1960	3326	3498	1787	2393	2071.54	2037.76	2062.6	2707.16	2658.48	2418.8	2802.68	2434.95	2152.69
Ccdc174	1997.9	-0.352704	0.135855	-2.59619	0.00942639	0.171014	ENSMUSG00000034083	46.2192	46.9392	51.4918	67.2334	67.722	51.8081	74.9507	59.1558	53.6699	2089	1841	1248	2247	1805	2405	2996	1524	2141	1575.33	1690.08	1795.06	2349.54	2308.95	1775.03	2457.44	2128.44	1901.26
Nxt1	1487.74	-0.370128	0.14242	-2.59885	0.00935376	0.171014	ENSMUSG00000036992	86.6104	65.8544	68.0794	111.39	102.128	80.8379	92.6413	94.0929	94.6291	1845	1111	834	1922	1256	1881	1901	1193	1808	1431.36	1149.51	1150.46	1887.66	1688.01	1342.79	1472.94	1641.13	1625.79
N4bp2	1230.65	0.436317	0.167918	2.5984	0.00936599	0.171014	ENSMUSG00000037795	10.1303	9.86946	8.87638	8.05337	5.46323	8.50838	8.37318	7.09804	5.7209	1969	1132	1023	1410	593	1825	1560	906	1095	1528.98	1572.96	1369.58	1246.1	824.478	1290.44	1215.54	1130.37	897.435
Dicer1	1730.87	0.37064	0.142789	2.59572	0.00943928	0.171014	ENSMUSG00000041415	17.5795	12.519	11.862	10.1799	10.9384	10.7106	10.9527	12.1377	10.55	2728	1612	1622	1506	1027	2348	1877	1340	1897	2503.43	1882.98	1727.29	1486.52	1557.89	1533.06	1500.56	1824.21	1561.87
Gapt	10.2233	2.23284	0.858853	2.5998	0.0093279	0.171014	ENSMUSG00000046006	1.11676	0.219541	0.279599	0.120233	0	0.09035	0.166166	0.129407	0.175229	57	9	8	5	0	5	8	4	8	44.1524	9.16759	11.3033	4.87431	0	3.59035	6.32025	5.39953	7.20211
Pkd1l3	119.334	0.925482	0.355647	2.60225	0.00926149	0.171014	ENSMUSG00000048827	2.06934	1.55816	1.95071	1.58219	0.453362	0.841031	0.746298	1.25113	1.07059	174	171	101	97	47	115	123	78	128	188.558	149.982	182.086	147.922	41.298	77.0595	65.4539	120.2	101.451
3110082I17Rik	2857.38	-0.341401	0.131514	-2.59593	0.00943351	0.171014	ENSMUSG00000053553	100.236	71.8047	84.7325	113.845	127.907	98.3435	113.752	106.333	97.1466	3531	2014	1746	3273	2650	3777	3909	2308	3140	2775.09	2099.68	2398.71	3232.06	3541.61	2736.5	3029.79	3106.89	2796.08
Mrps21	4209.63	-0.297521	0.11451	-2.59822	0.00937074	0.171014	ENSMUSG00000054312	623.308	552.429	568.304	743.613	767.568	631.409	678.217	757.036	750.93	4973	3366	2680	4611	3439	5511	5342	3503	5290	3818.21	3574.21	3559.84	4670.96	4702.43	3887.63	3996.96	4894.28	4782.14
Bcl9l	151.354	1.05722	0.406813	2.59879	0.00935525	0.171014	ENSMUSG00000063382	1.16156	2.9949	1.26102	0.632946	0.491063	1.55581	0.749082	0.696678	1.15891	160	322	102	96	53	276	102	79	178	143.937	392.393	159.288	80.7518	61.4703	193.948	89.0588	91.7089	149.627
Gm20008	83.3053	0.733435	0.282429	2.59688	0.00940736	0.171014	ENSMUSG00000117183	2.67178	1.92094	2.46089	1.70759	1.19376	0.952757	1.54926	1.56597	1.59344	161	93	84	85	42	63	89	58	87	125.833	95.5555	118.512	82.4663	56.2293	45.1015	70.1971	77.8362	78.0175
Utp11	5500.25	-0.282841	0.109084	-2.59288	0.00951765	0.171335	ENSMUSG00000028907	152.251	137.403	146.632	203.164	179.358	162.533	199.932	169.52	159.789	6255	4625	3436	6937	4361	7406	7831	4211	5913	4907.56	4677.86	4832.94	6715.06	5782.01	5265.75	6199.94	5766.74	5354.42
Phf20	3149.88	-0.332583	0.128277	-2.5927	0.00952272	0.171335	ENSMUSG00000038116	74.0636	63.9695	61.2627	96.7706	90.9026	74.6969	95.9874	75.531	74.5092	3732	2453	1957	3805	2489	4377	4298	2493	3503	2920.27	2663.98	2469.96	3912.3	3584.38	2960.17	3641.13	3142.83	3053.87
Tbc1d17	2429.28	-0.263934	0.101768	-2.59348	0.00950104	0.171335	ENSMUSG00000038520	44.8957	37.0473	39.3991	48.2828	54.9865	47.1851	52.7464	45.999	45.6351	2697	2498	1485	2398	2071	3757	2995	1824	2759	2320.51	2022.82	2081.99	2559.29	2842.32	2451.47	2623.54	2509.25	2452.31
Dcaf1	4482.23	0.341578	0.131814	2.59136	0.00955979	0.171335	ENSMUSG00000040325	53.9623	53.7891	50.6193	42.4942	34.9502	52.1566	44.4765	39.7958	39.1673	6738	5552	3560	4448	2350	6860	4985	3155	4388	5195.5	5469.89	4982.85	4195.31	3365.42	5047.32	4119.72	4043.71	3920.33
Cerkl	58.1045	0.986654	0.38056	2.59263	0.00952438	0.171335	ENSMUSG00000075256	1.9187	2.54127	2.49496	1.94354	0.738978	1.05743	0.775675	1.36992	1.33833	64	73	83	40	29	62	49	30	76	69.3126	95.9527	92.3545	71.9598	26.7634	38.1098	26.6753	51.6015	50.2104
Trbc1	8.53348	3.66975	1.416	2.59164	0.00955204	0.171335	ENSMUSG00000076490	0.796663	3.50541	1.28239	0	0	0	0	0.113812	0.749419	12	40	11	0	0	0	0	1	10	9.22093	42.362	14.8987	0	0	0	0	1.37848	8.94119
Igkv1-135	1101.92	0.41596	0.160333	2.59435	0.00947694	0.171335	ENSMUSG00000096336	312.592	312.623	277.079	243.854	207.399	218.191	186.801	230.261	278.349	1736	1318	931	1039	644	1330	1048	760	1353	1339.09	1414.49	1213.73	1071.16	888.555	939.481	769.896	1041.09	1239.83
Gm49325	66.4238	-1.78265	0.687796	-2.59182	0.00954685	0.171335	ENSMUSG00000112241	7.94993	3.14695	0	13.1698	13.2551	25.3288	8.57163	4.99286	12.4181	69	21	0	90	65	242	74	25	96	52.7042	21.9911	0	89.9787	87.9614	169.277	54.8549	34.7399	86.3074
Atp6v0d1	836.18	0.592413	0.228678	2.59061	0.00958072	0.171375	ENSMUSG00000013160	27.9608	49.1926	25.1592	22.1926	23.1971	17.1231	25.4586	26.7166	23.4606	1100	1511	568	719	525	736	962	642	832	855.76	1590.19	787.364	696.481	710.051	526.743	749.613	862.959	746.454
Fli1	2260.05	0.426198	0.164585	2.58953	0.00961062	0.171375	ENSMUSG00000016087	37.5982	32.3308	47.935	25.4899	27.2904	26.8193	32.1284	28.1773	37.1352	3255	2254	2345	1828	1382	2543	2646	1506	2917	2545.81	2312.19	3318.85	1769.81	1848.09	1825.25	2092.9	2013.56	2614.01
Pold2	5331.53	-0.426083	0.164536	-2.5896	0.00960871	0.171375	ENSMUSG00000020471	178.643	132.329	165.994	214.795	271.405	158.885	228.563	228.016	192.443	5756	3732	3037	6132	5570	5877	7653	4707	6169	4761.87	3725.58	4524.39	5871.02	7235.38	4256.86	5861.34	6414.51	5332.8
Abl2	1176.46	0.442093	0.17068	2.59019	0.00959241	0.171375	ENSMUSG00000026596	6.68138	7.06524	6.78061	5.00578	4.06098	6.88554	4.56855	4.69457	5.32502	1736	1454	1026	1102	621	1871	1176	757	1209	1358.38	1517.15	1409.61	1043.58	825.731	1407.33	893.58	1007.3	1125.48
Hmgn1	22485.8	-0.349244	0.134921	-2.58851	0.00963919	0.171598	ENSMUSG00000040681	450.246	395.055	475.497	582.55	627.817	430.868	653.744	551.533	557.58	24249	16995	14603	26055	19708	25419	33616	18268	27335	18972.2	17582	20487.5	25170.9	26457.8	18248.4	26501.3	24527.1	24425.2
Gatad2b	2137.65	0.439364	0.169755	2.58822	0.00964743	0.171598	ENSMUSG00000042390	19.0544	22.6974	17.6305	15.4381	10.9482	18.7944	14.8512	14.3397	14.3442	3199	2842	1768	1971	971	3318	2193	1526	2244	2426.76	3053.19	2296	2016.15	1394.53	2405.88	1819.67	1927.43	1899.19
Jpt2	2966.65	-0.330219	0.127618	-2.58756	0.0096658	0.171708	ENSMUSG00000024165	58.6996	40.7987	51.9897	67.1571	71.0268	59.5078	67.7421	62.3556	56.8395	3696	2019	1920	3542	2702	3859	4026	2327	3284	2877.13	2112.12	2605.67	3375.32	3481.77	2931.66	3194.36	3225.57	2896.25
Vps45	771.046	-0.445715	0.172334	-2.58634	0.00970016	0.171881	ENSMUSG00000015747	22.6693	15.5489	16.0394	24.653	32.3714	25.0064	22.6725	23.1349	21.5615	846	556	532	816	705	1194	1048	526	849	760.234	550.751	550.013	847.768	1085.73	842.9	731.492	818.81	751.71
Derl2	4557.15	-0.490325	0.189671	-2.58513	0.0097342	0.171881	ENSMUSG00000018442	137.155	96.1161	123.732	176.207	208.835	109.97	203.979	167.294	147.475	5111	3195	2721	5263	4143	5346	7146	3665	4835	4042.88	2992.49	3729.05	5326.31	6156.71	3258.04	5784.71	5204.75	4519.41
Itgax	22.4631	2.24002	0.86648	2.58519	0.00973254	0.171881	ENSMUSG00000030789	0.3746	1.19178	0.895148	0.130549	0	0.422556	0.3414	0.121123	0.030946	40	92	25	2	0	40	25	8	3	21.0601	70.7836	51.4593	7.52611	0	23.8777	18.4653	7.18663	1.80864
Fam102a	718.725	0.480414	0.185843	2.58505	0.00973648	0.171881	ENSMUSG00000039157	10.4728	9.12358	10.1838	5.81	6.14922	9.47358	6.09136	7.32116	8.18357	1134	784	584	555	407	1188	670	519	843	912.42	839.543	907.224	519.045	535.801	829.582	510.558	673.157	741.199
Lyrm9	422.034	0.612296	0.236804	2.58566	0.00971925	0.171881	ENSMUSG00000072640	9.37015	9.35118	16.3982	9.34075	6.6728	7.43454	6.42526	6.49887	9.68823	538	417	335	498	292	472	435	257	491	429.575	452.8	768.715	439.11	305.953	342.58	283.39	314.439	461.742
Pim1	2047.35	0.53233	0.205993	2.58421	0.0097601	0.172083	ENSMUSG00000024014	57.2989	85.4099	52.6255	53.3955	35.7111	59.4851	42.3121	39.11	44.3399	2795	3317	1450	2237	1071	3228	1849	1237	1930	2201.53	3465.26	2067.16	2103.11	1372.05	2296.67	1563.8	1585.75	1770.79
Clec2d	170.936	1.01416	0.392721	2.5824	0.00981162	0.172775	ENSMUSG00000030157	18.7248	7.183	8.64018	6.39006	8.33452	2.81747	3.29088	7.70103	5.79514	527	161	139	147	136	87	89	131	147	410.445	166.299	193.658	143.628	182.713	62.0743	69.3983	178.152	132.057
Mrpl46	1876.74	-0.358114	0.13872	-2.58157	0.0098353	0.172892	ENSMUSG00000030612	85.351	65.9438	77.9606	106.972	109.983	78.3705	110.247	93.4785	95.0812	2215	1361	1157	2264	1653	2229	2748	1460	2221	1722.93	1405.98	1609.2	2214.19	2220.43	1590.1	2141.02	1991.48	1995.33
G6pc3	1919.36	-0.370507	0.143535	-2.58131	0.00984276	0.172892	ENSMUSG00000034793	65.0765	50.3956	62.5772	75.3571	96.1232	77.2094	66.5318	71.5361	77.9483	2199	1369	1255	2061	1837	2844	2119	1501	2425	1719.3	1406.26	1690.51	2041.5	2539.85	2050.27	1691.05	1994.61	2140.89
Cyria	477.502	0.66094	0.256509	2.57668	0.00997548	0.173055	ENSMUSG00000020589	6.96373	8.01165	5.48611	3.60358	4.56807	7.29993	4.37818	3.10985	3.36376	849	712	415	375	203	901	473	246	392	628.351	763.536	506.174	333.421	412.236	662.055	380.062	296.146	315.535
Nf1	430.612	0.790347	0.306333	2.58003	0.00987925	0.173055	ENSMUSG00000020716	3.94337	7.88707	3.21492	1.99415	2.77133	4.71806	3.04975	2.6633	2.5839	539	859	254	326	256	784	484	210	301	455.505	962.255	379.728	236.202	320.16	547.778	338.916	324.678	310.287
Cdc23	3173.88	-0.395902	0.153716	-2.57555	0.0100082	0.173055	ENSMUSG00000024370	43.732	34.5411	40.6402	58.9151	64.3555	43.6976	60.5047	43.8039	45.5477	3636	2300	1881	3840	3083	3893	5097	2293	3331	2824.23	2356.85	2683.6	3902.14	4157.25	2836.45	3759.39	2986.32	3058.68
Ptprj	458.035	0.90794	0.352304	2.57715	0.00996197	0.173055	ENSMUSG00000025314	3.89762	7.35142	2.92909	2.23573	1.02929	3.90296	3.01469	2.34072	2.88673	635	1149	281	355	116	767	390	284	405	530.762	1057.08	407.859	312.189	140.182	534.228	394.951	336.4	408.665
Slc12a6	1050.82	0.547091	0.212403	2.57572	0.0100031	0.173055	ENSMUSG00000027130	13.7713	16.2242	14.5519	7.06478	7.43851	12.4931	11.0371	10.4495	13.2111	1521	1397	928	714	439	1492	1245	695	1402	1201.54	1494.69	1298.28	631.615	649.566	1095.18	926.095	962.597	1197.81
Gask1b	4.53382	3.96416	1.53797	2.57752	0.00995107	0.173055	ENSMUSG00000027955	0.050442	0.38545	0.345849	0	0	0.019363	0	0	0.057005	9	7	2	0	0	2	0	0	9	2.31694	18.6997	16.2436	0	0	0.893951	0	0	2.65028
Cd3d	9.06515	3.06095	1.18852	2.57543	0.0100115	0.173055	ENSMUSG00000032094	1.66813	2.15948	0.357318	0	0.130975	0	0.597463	0.04166	0.494143	22	37	8	0	3	0	2	1	6	24.3996	33.362	5.34423	0	1.91601	0	8.40745	0.643104	7.51397
Akap12	238.279	1.58699	0.615362	2.57895	0.00991024	0.173055	ENSMUSG00000038587	1.66642	6.88763	1.28793	0.711152	0.523202	1.39711	1.14556	1.54313	1.38592	268	894	116	94	49	245	173	156	202	209.153	913.055	165.291	91.5252	65.6753	176.248	138.324	204.404	180.833
Leo1	2362.31	-0.376118	0.145825	-2.57924	0.00990174	0.173055	ENSMUSG00000042487	48.786	36.4084	48.5591	56.0347	69.3947	49.8778	70.1309	52.0559	53.8126	2699	1639	1525	2525	2221	3037	3667	1772	2706	2107.17	1660.93	2144.62	2481.75	2997.66	2165.33	2914.16	2372.9	2416.29
Vcpip1	2070.41	0.422919	0.164169	2.57613	0.00999135	0.173055	ENSMUSG00000045210	10.7313	13.177	11.1232	9.18125	7.12695	11.2515	10.0816	7.41519	8.00992	2845	2823	1660	2025	1108	3273	2534	1222	1931	2228.76	2890.23	2362.06	1955.31	1479.85	2348.36	2014.18	1625.44	1729.5
Irgm1	1107.77	0.361439	0.140299	2.57621	0.00998905	0.173055	ENSMUSG00000046879	24.0763	29.9742	33.0603	22.508	20.5604	23.3173	25.0743	21.1622	24.6067	1350	1336	1046	1019	667	1457	1332	725	1247	1049.77	1380.39	1473.97	1006.33	896.582	1021.88	1051.8	973.807	1115.37
Ighv1-78	38.4681	1.09262	0.423744	2.5785	0.00992317	0.173055	ENSMUSG00000096326	18.4648	18.7215	8.40595	6.41615	4.21662	6.26568	8.13514	7.86412	10.3738	94	63	26	25	12	35	42	24	40	70.3748	75.3636	32.7595	25.0753	16.0728	24.0025	29.829	31.6323	41.1029
Gm8557	190.718	-0.709155	0.275112	-2.57769	0.00994624	0.173055	ENSMUSG00000114103	20.9087	30.0067	14.8274	30.3696	44.2526	48.1938	40.2329	27.9901	28.0789	161	177	68	182	192	408	309	126	191	123.994	187.771	89.9231	184.673	262.864	287.703	229.843	176.037	173.655
Nsd3	1608.41	0.404612	0.157233	2.57333	0.0100726	0.173684	ENSMUSG00000054823	19.4004	27.9087	19.9835	15.3686	17.3717	19.4713	17.982	14.986	18.1449	2070	2307	1236	1411	1010	2296	1804	1034	1713	1614.04	2452.4	1700.01	1311.11	1445.44	1628.22	1439.28	1315.82	1569.35
A530041M06Rik	281.165	-0.783805	0.304553	-2.57362	0.010064	0.173684	ENSMUSG00000104973	3.91491	4.78839	3.50023	7.49788	11.8773	6.00384	8.84396	4.80088	3.95987	227	223	115	359	402	382	489	171	208	177.395	229.169	162.178	348.383	538.26	273.441	385.538	229.587	186.536
Eif2ak2	150.592	0.976406	0.3796	2.57219	0.0101056	0.173977	ENSMUSG00000024079	3.59666	1.5843	4.12613	0.821204	1.44033	1.33563	2.65135	1.09723	2.19618	352	127	228	68	86	122	204	50	171	255.138	118.702	299.291	59.7344	102.186	95.2303	180.944	82.1446	161.959
Rabif	1891.63	-0.38132	0.148288	-2.57148	0.0101266	0.173977	ENSMUSG00000042229	30.6273	21.3298	27.9238	37.7824	39.1072	30.3647	40.7826	33.0502	29.2817	2263	1268	1167	2310	1689	2462	2869	1505	1962	1769.68	1301.73	1649.82	2238.59	2259.94	1763.48	2267.06	2015.42	1758.91
Septin5	7.96679	2.91778	1.13449	2.57188	0.0101148	0.173977	ENSMUSG00000072214	0.259458	1.10137	0.52722	0.243757	0.034248	0	0	0.130356	0.102326	14	13	7	7	1	0	0	4	5	7.36369	34.0478	15.3001	7.09387	0.972107	0	0	3.90449	3.01909
Il5ra	54.7385	1.49901	0.583253	2.57008	0.0101675	0.174467	ENSMUSG00000005364	1.32328	1.61809	1.30788	0.28328	0.164141	1.26452	0.32544	0.207269	0.78939	124	100	58	22	9	105	29	12	48	87.5307	113.047	88.4614	19.2143	10.8587	84.072	20.7101	14.4694	54.2829
Cnot1	6621.11	0.387851	0.150983	2.56883	0.0102042	0.174886	ENSMUSG00000036550	76.8325	73.052	78.8491	66.231	42.3979	65.2585	64.4636	52.7344	62.4935	9757	9110	5122	6315	3324	10730	6515	4648	6795	7718.31	7751.36	8100.28	6823.25	4259.46	6589.3	6230.24	5591	6526.77
Cdc6	94.9302	1.23858	0.482328	2.56792	0.0102311	0.175134	ENSMUSG00000017499	2.1211	4.08251	1.25642	0.462307	1.23053	1.01604	0.494369	1.6696	1.57194	163	247	54	32	58	84	43	71	89	126.59	257.343	76.6738	28.2922	73.4481	60.9487	28.3851	105.161	97.5295
Mrpl45	2891.97	-0.304134	0.118458	-2.56745	0.010245	0.175159	ENSMUSG00000018882	53.767	45.6038	52.8139	61.3801	72.9613	54.8267	71.9128	60.4561	58.8295	3318	2198	1853	3142	2626	3689	4232	2303	3286	2586.27	2316.89	2597.66	3027.5	3509.97	2650.72	3327.85	3069.05	2941.81
Bid	4761.99	-0.311423	0.121352	-2.56628	0.0102796	0.175537	ENSMUSG00000004446	104.703	81.4326	98.6816	124.55	127.286	105.492	135.271	119.33	102.668	5600	3537	3028	5518	3962	6291	7041	3986	5029	4419	3630.39	4258.05	5390.36	5373.35	4475.04	5492.28	5315.01	4504.47
Lyst	860.574	0.65927	0.257026	2.56499	0.0103178	0.175764	ENSMUSG00000019726	4.38786	6.2159	4.13854	2.4176	3.12291	4.65246	2.2923	2.34642	4.10287	1310	1412	765	615	443	1322	719	432	963	987.627	1477.72	952.496	557.986	702.996	1052.54	496.378	557.381	960.041
Gpank1	765.282	-0.292583	0.114051	-2.56538	0.0103064	0.175764	ENSMUSG00000092417	32.0321	33.5271	32.5414	42.6353	39.7755	39.8355	39.01	40.385	41.4635	871	679	488	835	600	1099	959	592	948	635.105	701.336	660.096	866.395	788.385	793.733	743.451	844.868	854.167
Cyp4f18	104.902	1.14744	0.447647	2.56326	0.0103694	0.176219	ENSMUSG00000003484	2.25324	9.64625	3.33125	1.36946	2.05837	2.19258	3.50199	1.83084	3.17359	94	312	79	47	50	97	131	39	116	70.6396	319.409	106.788	44.024	64.5384	69.0893	105.622	60.5755	103.432
Tmsb15l	82.3517	0.981297	0.382832	2.56326	0.0103695	0.176219	ENSMUSG00000072955	8.33191	5.53003	13.2605	6.23373	2.31935	4.32421	3.49302	6.24136	4.87513	143	75	131	86	23	81	58	63	75	110.9	77.9574	179.79	84.753	31.0314	57.5523	44.6095	87.0527	67.5194
Gm43774	62.7535	-0.971594	0.379191	-2.56228	0.0103988	0.176505	ENSMUSG00000104631	2.70586	3.55952	1.28876	3.73654	6.44761	6.62544	5.8652	4.19053	3.66773	51	53	14	57	70	137	107	47	62	39.5906	55.008	19.2813	56.0602	94.3491	97.4353	82.56	64.7086	55.7887
Arhgap18	13.4182	2.88267	1.12544	2.56137	0.0104261	0.176755	ENSMUSG00000039031	0.237542	0.60881	0.543581	0.012591	0.024964	0.076084	0	0	0.252977	17	47	24	1	1	8	0	0	22	15.8161	42.8145	37.0085	0.859664	1.66235	5.0918	0	0	17.5107
Zbtb46	2199.07	-0.469998	0.183628	-2.55951	0.0104819	0.1769	ENSMUSG00000027583	22.7158	23.8049	21.2477	32.5831	46.3949	27.709	33.2693	25.5772	25.203	2220	1845	1221	2564	2463	3057	2849	1516	2294	1713.03	1896.06	1638.42	2519.58	3499.13	2100.26	2413.69	2035.62	1975.84
Mxd4	35.4223	1.034	0.403837	2.56044	0.0104541	0.1769	ENSMUSG00000037235	0.754814	0.673377	0.600411	0.395961	0.217851	0.473728	0.212978	0.38073	0.320627	79	58	36	21	13	53	22	24	30	58.3922	55.4467	47.1549	31.4097	16.855	36.8348	15.8507	31.0841	25.7725
Snrnp40	5563.11	-0.311813	0.12183	-2.55942	0.0104848	0.1769	ENSMUSG00000074088	170.778	139.876	178.208	215.599	231.921	179.474	226.571	188.474	185.448	6285	4148	3833	6560	4850	7098	7908	4280	6171	4903.28	4241.78	5231.9	6347.47	6659.62	5179.3	6258.36	5711.03	5535.28
Ccdc82	383.373	0.443883	0.173403	2.55984	0.0104721	0.1769	ENSMUSG00000079084	4.42236	6.49385	5.06802	4.01562	3.53877	4.3159	4.47795	3.63078	3.85392	492	515	299	376	239	506	438	246	409	375.788	582.825	440.355	349.897	300.742	368.617	366.074	325.608	340.45
Bcat1	4484	-0.415597	0.162481	-2.55783	0.0105329	0.177498	ENSMUSG00000030268	73.9381	61.8244	58.8253	111.005	90.178	75.9088	103.472	77.3215	67.8882	5288	3518	2377	6383	3648	6059	6867	3342	4316	4079.5	3602.84	3318.78	6280.31	4976.14	4209.64	5492.4	4502.41	3893.99
Cecr2	643.717	0.463774	0.181349	2.55735	0.0105473	0.177529	ENSMUSG00000071226	5.4406	7.11928	4.36266	4.26528	4.78843	3.80443	4.47611	3.36207	4.26781	985	963	453	632	501	647	699	368	682	738.19	1020.25	605.27	593.427	649.782	518.831	584.283	481.431	601.989
Slc18a1	24.3493	1.80558	0.706191	2.55679	0.0105642	0.177602	ENSMUSG00000036330	1.00182	1.54214	0.360581	0.164137	0.190152	0.399809	0.064916	0.220293	0.633817	22	45	10	11	9	34	5	11	41	46.577	75.7275	17.142	7.82507	8.84173	18.6832	2.90358	10.8091	30.6343
Evi5l	73.8527	0.783086	0.306685	2.55339	0.010668	0.177795	ENSMUSG00000011832	2.92568	1.63386	1.63827	1.23571	1.23656	1.18234	1.06618	1.58328	0.999503	169	92	54	79	33	76	61	63	63	141.595	83.159	80.9494	61.2304	59.7612	57.4259	49.582	80.7453	50.2258
Nelfb	2916.52	-0.300765	0.117926	-2.55046	0.0107581	0.177795	ENSMUSG00000013465	52.9437	44.6032	50.8181	59.6093	70.2631	55.235	72.4242	55.2249	57.4141	3386	2343	1847	3189	2624	3768	4215	2164	3378	2639.13	2348.33	2590.25	3046.91	3502.89	2767.42	3473.21	2905.28	2975.28
Phlda1	117.096	1.3713	0.537437	2.55156	0.0107241	0.177795	ENSMUSG00000020205	1.72933	11.6242	2.76011	1.124	2.95547	3.79478	1.40134	1.68326	1.888	84	364	59	45	74	193	65	50	83	61.0828	433.661	99.6882	40.7104	104.405	134.723	47.6195	62.6502	69.3275
Plk2	673.222	0.830572	0.326047	2.5474	0.010853	0.177795	ENSMUSG00000021701	9.49907	27.9352	12.3296	6.07414	10.7883	13.6011	9.24305	6.6587	10.9639	679	1580	493	336	450	1070	628	289	717	525.049	1630.86	696.854	344.272	596.383	755.629	491.512	388.431	630.005
Slc4a7	2533.82	0.680965	0.266807	2.55228	0.0107022	0.177795	ENSMUSG00000021733	22.1901	38.5506	20.4509	16.7178	13.5553	29.2696	16.4825	13.4518	13.8103	3488	4344	1872	2109	1187	4759	2447	1354	2085	2686.68	4929.86	2531.88	2075.55	1641.41	3561.94	1919.9	1718.87	1738.28
Abcb6	1141.43	-0.460968	0.180638	-2.55189	0.010714	0.177795	ENSMUSG00000026198	16.3594	16.1675	13.4149	18.7668	19.1588	29.9207	24.5636	17.9445	18.1164	1237	1050	565	1073	873	2434	1558	839	1222	949.44	991.21	796.665	1116.57	1111.38	1745.03	1370.93	1098.62	1093
Psme3ip1	2783.89	-0.420274	0.164979	-2.54745	0.0108514	0.177795	ENSMUSG00000031774	71.1717	48.4076	62.6635	90.8761	98.6074	61.7059	88.6655	73.6764	78.9566	3293	2106	1690	3341	2361	3311	3887	2108	3365	2601.92	1869.17	2342.49	3406.71	3605.37	2267.4	3118.48	2842.64	3000.8
Ciapin1	2880.76	-0.395954	0.15526	-2.55027	0.010764	0.177795	ENSMUSG00000031781	77.1482	54.1433	71.7969	86.6823	113.493	75.9171	100.522	75.9508	87.7784	3374	2035	1782	3286	2812	3522	3918	2129	3545	2650.75	1964.96	2522.56	3054.13	3899.86	2621.89	3322.94	2754.22	3135.52
Nup93	4249.45	-0.327498	0.128421	-2.5502	0.0107662	0.177795	ENSMUSG00000032939	72.974	56.8348	66.9393	87.7342	98.966	79.4189	89.6097	73.7102	70.1326	5003	3165	2626	5034	3994	6003	5959	3105	4444	3946.8	3246.67	3701.98	4865.69	5353.23	4317.34	4662.65	4207.37	3943.29
Wdr3	8766.95	-0.442281	0.173216	-2.55334	0.0106694	0.177795	ENSMUSG00000033285	114.126	89.618	100.597	160.304	177.512	119.188	163.792	112.184	105.128	10261	6333	5109	11162	9001	11171	13412	6070	8226	7772.06	6446.06	7005.05	11194.2	12090.2	8158.26	10731.1	8062.86	7442.72
Cntln	24.3842	1.41702	0.555126	2.55262	0.0106917	0.177795	ENSMUSG00000038070	0.25106	0.583383	0.441173	0.138375	0.083316	0.326506	0.156663	0.129106	0.119078	36	56	16	17	7	53	22	9	12	24.1389	59.2436	43.3735	13.6426	8.01162	31.5534	14.4913	13.1006	11.9024
Trp53rka	2868.67	-0.426345	0.166966	-2.55349	0.0106651	0.177795	ENSMUSG00000039725	77.3883	52.0041	70.0123	94.9537	111.138	68.9441	102.318	83.3046	80.9353	3360	1815	1790	3491	2808	3282	4300	2242	3245	2656.23	1885.69	2457.6	3341.84	3814.99	2378.51	3378.7	3016.92	2887.53
Gm17018	466.148	-0.501893	0.196991	-2.5478	0.0108406	0.177795	ENSMUSG00000041035	18.0162	11.091	19.4265	23.1765	24.9955	18.3508	22.1932	25.511	23.8972	521	266	312	510	423	577	614	420	592	397.633	258.881	438.408	524.781	552.614	407.602	471.946	594.275	549.192
Atpaf2	1438.25	-0.389313	0.152393	-2.55466	0.0106292	0.177795	ENSMUSG00000042709	40.9061	33.3464	41.1294	51.1068	56.722	37.924	59.7705	52.1126	48.0424	1678	1061	888	1539	1254	1694	2180	1235	1654	1237.49	1065.49	1272.28	1585.37	1716.16	1153.14	1739.57	1663.81	1510.91
Zfp574	936.969	-0.39859	0.15639	-2.54869	0.0108128	0.177795	ENSMUSG00000045252	12.1876	10.344	10.0332	14.7905	18.8654	12.6407	15.1392	13.494	12.1234	1058	713	509	1096	998	1224	1276	743	994	845.733	758.142	711.922	1052.44	1309.29	881.661	1010.7	988.241	874.589
Ppp1r15b	3083.46	0.448138	0.175596	2.5521	0.0107075	0.177795	ENSMUSG00000046062	34.8116	44.1158	38.525	31.3192	23.0596	37.5928	24.7657	26.513	31.0156	4236	4155	2512	3160	1600	4981	2792	1986	3298	3243.61	4341.73	3670.85	2992.33	2149.01	3521.07	2220.01	2607.96	3004.56
Ankrd23	569.316	-0.647393	0.253805	-2.55075	0.0107491	0.177795	ENSMUSG00000067653	18.2641	17.8567	12.0332	18.9036	42.8118	21.2012	27.4477	20.9821	22.119	549	473	237	493	780	715	851	404	674	457.594	472.26	307.85	486.003	1073.18	533.921	661.873	554.802	576.369
Ccnf	446.666	1.81901	0.7122	2.55407	0.0106472	0.177795	ENSMUSG00000072082	4.48887	27.8872	2.95171	2.7849	2.99645	6.28897	2.57379	2.58794	3.42299	381	1459	140	251	143	601	221	162	324	311.655	2044.99	209.55	198.265	208.064	438.866	171.914	189.626	247.062
Ifi207	15.246	1.99409	0.782605	2.54802	0.0108337	0.177795	ENSMUSG00000073490	0.212385	0.721683	0.356135	0	0.137648	0.183355	0.15422	0.079282	0.110867	19	52	18	0	7	18	12	4	9	14.541	52.1871	24.9322	0	9.15835	12.6176	10.158	5.72862	7.891
Dohh	1678.74	-0.310256	0.121695	-2.54944	0.0107895	0.177795	ENSMUSG00000078440	61.5452	55.5891	58.0011	68.9452	86.3333	71.0933	67.4992	76.7476	68.6129	1919	1340	1020	1730	1557	2424	1975	1456	1998	1487.07	1418.19	1433.32	1707.76	2086.84	1726.27	1568.68	1957.28	1723.27
Zfp335os	94.4055	1.32793	0.519673	2.55532	0.0106091	0.177795	ENSMUSG00000085436	2.66179	16.8251	3.4584	3.16081	2.45761	4.23892	1.83321	3.57288	3.53552	69	341	51	66	33	116	45	55	82	52.8631	350.335	69.7862	63.552	48.3634	83.9559	34.4694	73.7943	72.5303
Gm43294	30.3267	-1.45387	0.570513	-2.54835	0.0108233	0.177795	ENSMUSG00000107094	0.141531	0.508704	0.16664	0.646947	0.915463	1.03182	1.18812	0.460181	0.381741	9	26	6	34	34	72	72	18	22	7.03525	26.708	8.47002	32.9758	45.5116	51.5524	56.8185	24.1415	19.7269
Mrpl28	1964.03	-0.424603	0.16682	-2.54527	0.0109192	0.178465	ENSMUSG00000024181	94.4183	76.5951	79.1393	108.907	131.022	78.7285	116.416	124.218	118.835	2267	1456	1093	2138	1818	2081	2701	1800	2572	1766.63	1513.69	1514.11	2089.5	2451.8	1480.59	2095.56	2452.91	2311.5
4932438A13Rik	1505.25	0.479119	0.188219	2.54554	0.0109109	0.178465	ENSMUSG00000037270	12.5168	20.3797	15.6188	10.946	10.1261	15.3695	13.0169	10.8927	10.4609	1853	2173	1221	1351	798	2384	1730	971	1462	1393.27	2395.99	1777.72	1249.38	1127.29	1719.55	1393.97	1279.63	1210.5
D330023K18Rik	106.051	-0.634476	0.24942	-2.5438	0.0109653	0.179011	ENSMUSG00000087269	4.81832	4.98952	5.20919	7.02142	8.3094	10.1267	8.83343	7.21082	5.67772	91	79	60	112	94	214	162	81	102	72.8657	79.6954	80.5514	108.881	125.675	153.925	128.516	115.085	89.2614
Ldlr	4605.46	-0.447834	0.176239	-2.54106	0.0110519	0.180069	ENSMUSG00000032193	45.0269	37.4613	40.4313	53.0677	56.6959	80.9046	60.5475	43.9059	44.7174	5097	3431	2646	4968	3744	9820	6426	3054	4559	3975.58	3493.48	3650.24	4804.59	5006.48	7179.86	5143.09	4091.26	4104.56
Plcxd2	620.947	0.818707	0.322207	2.54093	0.0110557	0.180069	ENSMUSG00000087141	3.62294	9.17076	3.96188	3.12195	3.21353	5.43442	2.28682	2.66713	2.67821	698	1427	430	500	363	1149	418	319	469	546.67	1461.56	611.282	483.046	484.953	824.199	331.968	424.731	420.117
Atp6v1g2	30.2845	1.35118	0.531925	2.54016	0.0110801	0.180112	ENSMUSG00000024403	1.21649	2.73682	1.16193	0.389759	0.440755	1.30704	0.518187	0.629573	0.855406	30	100	20	15	12	39	19	18	26	34.8638	82.9498	34.0938	11.4688	12.6495	37.6986	14.3057	19.0667	25.4638
Cd300lf	71.347	0.969394	0.381644	2.54005	0.0110838	0.180112	ENSMUSG00000047798	2.68778	2.81665	2.85442	0.654585	1.51086	1.52127	1.38114	1.0452	2.50262	128	108	81	27	39	74	58	33	109	99.6108	110.254	108.17	24.8758	56.0002	56.6675	49.2437	40.8807	96.4204
Ccdc107	1437.56	-0.363602	0.143231	-2.53857	0.0111305	0.180663	ENSMUSG00000028461	97.2524	87.3117	79.834	111.361	113.374	93.3932	118.676	134.108	116.829	1686	1192	788	1550	1113	1773	1974	1367	1790	1297.51	1230.35	1089.11	1523.96	1512.77	1252.39	1523.26	1888.3	1620.4
Rftn1	23215.2	-0.374934	0.147749	-2.53764	0.0111603	0.180691	ENSMUSG00000039316	405.447	342.562	349.877	498.787	587.23	359.872	545.837	440.618	449.598	26927	18018	13543	27014	22012	26554	34149	18030	26784	20952.8	18698	18488.4	26431.5	30350.7	18692.6	27137.6	24031.2	24154.3
Ndufaf8	1399.08	-0.378922	0.149318	-2.53769	0.0111587	0.180691	ENSMUSG00000078572	114.582	96.4453	107.741	118.757	163.628	122.24	128.014	147.401	156.967	1577	1112	820	1441	1261	1727	1697	1269	1862	1226.02	1089.95	1178.79	1302.98	1751.01	1314.64	1317.77	1664.51	1746.02
Gm44434	9.12667	2.01246	0.793145	2.53731	0.0111707	0.180691	ENSMUSG00000107813	0.152399	0.138693	0.413813	0.061278	0.01736	0.083326	0.042745	0.032874	0.100739	15	11	23	5	1	9	4	2	9	11.7373	11.282	32.5887	4.83937	1.3372	6.45031	3.16721	2.67205	8.0658
S100a11	608.694	0.715808	0.282242	2.53615	0.0112079	0.180997	ENSMUSG00000027907	138.651	115.922	105.428	56.123	41.1601	95.1505	55.2225	84.1142	108.658	1205	776	543	382	202	907	476	424	834	928.463	819.845	722.255	385.312	275.77	639.975	355.892	594.325	756.413
Mtmr3	1820.53	0.301635	0.118958	2.53565	0.0112238	0.180997	ENSMUSG00000034354	17.8579	17.8062	17.1017	14.1046	14.2207	12.9911	14.2285	16.4569	14.5607	2635	2115	1406	1733	1203	2085	1998	1522	1976	2059.26	2168.7	2016.49	1667.79	1640.04	1505.71	1578.48	2002.79	1745.52
Sh2d5	320.603	-0.6801	0.268229	-2.53552	0.0112281	0.180997	ENSMUSG00000045349	4.55799	2.8017	3.8526	6.07713	9.33754	3.856	5.83067	6.70315	4.56625	365	184	190	398	325	300	446	302	326	272.105	176.664	235.176	372.014	557.504	231.374	334.874	422.326	283.39
Rbpj	2243.28	0.301567	0.118966	2.53489	0.0112482	0.181114	ENSMUSG00000039191	22.6988	21.2761	22.8904	19.8398	15.3736	18.1225	20.7508	18.7552	16.8755	3280	2460	1858	2394	1307	2788	2798	1686	2168	2548.53	2522.72	2628.33	2284.57	1726.24	2045.15	2241.92	2222.02	1970.05
Coa3	2770.97	-0.464994	0.183479	-2.53432	0.0112665	0.181202	ENSMUSG00000017188	162.612	127.356	148.345	199.483	240.19	128.48	220.501	225.592	207.234	3101	1886	1630	3080	2639	2688	4069	2552	3545	2401.9	1986.88	2240.55	3021.41	3548.23	1907.46	3133.4	3516.69	3182.2
Gm37499	10.0814	1.92874	0.761216	2.53376	0.0112844	0.181284	ENSMUSG00000103901	0.164809	0.409209	0.23339	0.039779	0.01878	0.100124	0.080868	0.142306	0.04843	15	30	12	3	1	10	7	8	4	11.7356	30.7762	16.9935	2.90452	1.3374	7.16598	5.53985	10.6943	3.58509
Zc3hc1	2166.64	-0.315793	0.124683	-2.53276	0.0113168	0.181596	ENSMUSG00000039130	58.8293	44.3905	51.7072	63.2061	73.643	55.724	69.6342	64.6984	62.8401	2596	1633	1315	2377	1973	2769	2953	1769	2569	2071.95	1651.29	1862.14	2282.67	2594	1972.62	2359.44	2404.84	2300.83
Hba-a2	77.5461	3.38785	1.33798	2.53207	0.0113392	0.18175	ENSMUSG00000069917	8.51637	15.5308	50.5998	0	0.924751	0.621475	6.96839	0.349304	5.72663	84	119	294	0	5	7	68	2	50	65.0917	125.853	395.483	0	6.83967	4.96858	51.3838	2.81956	45.4753
Adgre4	3.7427	3.20838	1.26765	2.53097	0.0113746	0.182076	ENSMUSG00000032915	0.054719	0.163034	0.154982	0.026414	0	0.009973	0.011507	0.035435	0	5	12	8	2	0	1	1	2	0	3.91362	12.3158	11.3343	1.93717	0	0.71692	0.791778	2.67468	0
Nlrc5	996.126	0.427171	0.168799	2.53064	0.0113854	0.182076	ENSMUSG00000074151	19.307	22.0808	18.4329	13.5996	13.8864	20.8081	14.5571	13.6931	13.6585	1348	1429	684	872	615	1795	1017	694	905	1132.19	1367.63	1105.29	817.767	814.423	1226.46	821.261	847.452	832.665
Slc38a10	2463.62	-0.38142	0.150785	-2.52957	0.0114202	0.182426	ENSMUSG00000061306	35.4641	24.3709	29.4328	37.5023	43.4529	30.5609	42.5591	38.0946	42.539	3123	1734	1522	2798	2118	2753	3473	1907	3279	2387.69	1733.33	2026.58	2589.38	2926.48	2067.77	2756.66	2706.94	2977.71
Ogg1	438.666	-0.408693	0.161645	-2.52833	0.0114605	0.182656	ENSMUSG00000030271	14.713	11.5182	13.3717	14.2197	21.0518	17.7146	18.3504	19.0631	16.1081	508	306	267	404	395	653	586	395	527	391.128	323.409	363.48	387.622	559.708	473.332	469.315	534.832	445.169
Kdm3b	1829.39	0.502019	0.198544	2.5285	0.0114551	0.182656	ENSMUSG00000038773	17.7383	32.4563	18.6706	14.5797	17.5867	19.2289	16.6962	15.7201	15.2604	2313	2603	1305	1562	1102	2658	1920	1305	1919	1702.99	3291.14	1832.88	1435.31	1688.78	1855.42	1542.12	1592.8	1523.1
Pip4k2b	258.236	0.467683	0.18512	2.52638	0.0115246	0.183469	ENSMUSG00000018547	2.88721	3.08174	2.79013	2.16337	2.07778	1.86669	1.82888	2.35987	2.5166	389	335	212	242	164	276	234	197	308	304.54	343.327	300.93	233.988	219.188	197.903	185.588	262.699	275.957
Gm30211	124.989	0.718668	0.28454	2.52572	0.0115462	0.183607	ENSMUSG00000105646	1.96467	2.20759	3.78511	1.25452	1.60506	1.8816	2.13016	1.19692	1.66926	157	142	171	83	75	165	162	59	121	122.798	145.736	241.911	80.4038	100.333	118.207	128.09	78.9541	108.465
Gzma	21.0644	2.40155	0.951556	2.52382	0.0116089	0.184395	ENSMUSG00000023132	4.76097	2.50122	1.71176	0.065553	0	0.193444	0.374823	0.713282	2.01134	90	38	19	1	0	4	8	8	34	71.5253	39.6884	26.2956	1.00985	0	2.92101	5.41739	11.3092	31.4131
Nectin4	19.9625	1.9723	0.781782	2.52282	0.0116417	0.18471	ENSMUSG00000006411	0.115304	1.28801	0.191101	0.043474	0.12539	0.229249	0.165357	0.136128	0.138591	11	99	9	3	7	24	15	7	12	8.22596	97.0531	13.9406	3.1803	8.94663	16.4386	11.3492	10.2494	10.2788
Lsm14b	161.73	0.777867	0.308417	2.52213	0.0116647	0.184792	ENSMUSG00000039108	5.72283	3.35752	3.8245	1.80709	3.3283	2.63057	1.42179	2.94877	3.03018	371	175	141	97	126	188	89	118	178	290.897	180.258	198.783	94.1907	169.202	134.398	69.529	158.189	160.125
Gm7666	227.331	-0.558873	0.22161	-2.52188	0.0116731	0.184792	ENSMUSG00000067547	16.0608	10.4138	11.355	16.9772	20.2874	14.665	17.9433	23.575	19.2935	276	141	113	236	201	277	300	240	297	214.056	146.548	155.114	232.553	271.172	196.824	230.777	331.568	267.371
Mthfd2	7520.09	-0.364794	0.144756	-2.52007	0.0117332	0.184951	ENSMUSG00000005667	160.198	163.746	136.731	239.007	198.281	210.53	216.924	187.738	150.41	8214	6752	3985	10160	5958	11826	10666	5794	6938	6411.26	6921.55	5595.37	9808.3	7936.31	8468.65	8352.04	7929.45	6257.83
Gfus	1527.89	-0.350639	0.139143	-2.52	0.0117356	0.184951	ENSMUSG00000022570	65.7712	48.9332	62.8326	77.5105	92.8338	68.959	80.637	65.6367	72.247	1810	1068	1008	1745	1416	1999	2128	1110	1797	1401.56	1101.35	1369.1	1693.69	1978.5	1477	1653.14	1476.14	1600.51
Pdcd5	4107.35	-0.296301	0.117541	-2.52084	0.0117074	0.184951	ENSMUSG00000030417	360.199	316.649	341.255	428.411	454.869	358.34	414.185	460.382	409.283	4788	3275	2652	4551	3423	5196	5306	3574	4860	3690.8	3427.15	3574.82	4500.97	4661.06	3690.35	4082.58	4978.35	4360.08
Chrac1	2426.01	-0.27036	0.107254	-2.52076	0.0117103	0.184951	ENSMUSG00000068391	129.325	139.819	128.023	151.14	178.092	151.359	164.883	168.841	156.243	2614	2259	1482	2498	2079	3359	3223	2016	2786	2027.93	2315.63	2052.68	2430.41	2792.93	2385.66	2487.51	2794.38	2546.94
Ptpn7	349.685	0.582574	0.231228	2.51948	0.0117529	0.185016	ENSMUSG00000031506	5.35183	9.34502	5.58397	4.75512	4.91765	5.25088	5.54779	3.67148	3.51326	444	620	254	325	230	479	446	185	266	344.663	635.654	367.715	314.017	316.74	339.891	343.727	249.54	235.215
Angpt2	9.97166	1.98888	0.789855	2.51803	0.0118015	0.185212	ENSMUSG00000031465	0.257261	0.394571	0.151817	0.025868	0.128237	0.029304	0.045088	0.138802	0.059056	24	23	8	2	7	3	4	8	5	18.2551	29.5721	11.0155	1.88225	9.10073	2.09004	3.078	10.3947	4.35649
Pelo	516.452	-0.337816	0.134164	-2.51793	0.0118047	0.185212	ENSMUSG00000042275	14.498	12.365	15.5409	20.1092	16.8959	17.8015	18.7335	17.9372	16.7139	564	385	344	643	382	760	697	425	587	440.065	396.586	482.403	625.955	512.283	543.207	546.724	573.996	526.848
Nr2c2ap	2452.37	-0.280349	0.111339	-2.51798	0.0118029	0.185212	ENSMUSG00000071078	104.093	95.7002	98.246	113.267	129.105	135.7	110.601	117.411	125.541	2822	2049	1528	2491	2027	4014	2918	1919	3021	2192.35	2128.3	2115.07	2445.66	2718.69	2872.58	2240.85	2609.51	2748.33
Nfat5	1949.41	0.606688	0.24132	2.51404	0.0119358	0.185898	ENSMUSG00000003847	12.6271	24.2365	10.7236	12.019	9.32254	13.4293	10.896	8.81668	9.28912	2504	3586	1281	1833	1076	2967	2108	1033	1741	1947.06	3947.22	1690.8	1900.39	1437.68	2081.34	1616.37	1434.78	1489.06
Tes	4126.02	-0.355485	0.141383	-2.51434	0.0119254	0.185898	ENSMUSG00000029552	71.1182	64.4594	71.8458	92.3836	114.491	74.048	96.147	81.8604	78.6137	4467	3240	2558	4795	4179	5129	5740	3166	4464	3488.93	3339.99	3604.04	4647.34	5617.21	3651.23	4537.84	4238.29	4009.33
L3mbtl3	218.999	0.619449	0.246337	2.51464	0.0119154	0.185898	ENSMUSG00000039089	3.26571	5.12408	2.73122	1.86459	2.40965	3.10712	2.67011	2.33623	2.36741	318	414	147	144	135	309	243	134	210	243.713	403.891	208.417	142.687	179.849	233.064	191.704	184.002	183.669
Utp4	11488	-0.376538	0.149715	-2.51502	0.0119025	0.185898	ENSMUSG00000041438	226.776	193.745	204.167	305.763	336.296	264.999	299.304	232.894	204.254	12953	9055	6610	14434	11326	16671	16511	8206	10605	10183.3	9189.06	9374.61	14079.1	15103.2	11960.6	12930.2	11037.2	9535.12
Atp10d	557.126	0.648793	0.258013	2.51457	0.0119176	0.185898	ENSMUSG00000046808	7.83589	15.7896	7.11303	6.03073	8.36867	7.86139	6.93959	5.5564	5.39522	613	1314	346	479	394	804	631	268	438	542.752	1155.14	503.783	428.334	579.726	547.303	462.432	406.175	388.495
Tmx2	4101.85	-0.395462	0.15731	-2.51389	0.0119407	0.185898	ENSMUSG00000050043	90.4069	71.2678	93.8279	110.901	137.831	87.5845	137.725	105.289	101.03	4499	2844	2618	4597	3998	4752	6502	3257	4550	3513.86	2925.57	3728.18	4419.91	5356.87	3421.51	5149.58	4318.91	4082.31
Clk2	2780.26	-0.229847	0.0913993	-2.51475	0.0119115	0.185898	ENSMUSG00000068917	62.7907	53.3219	58.749	67.5664	75.5576	69.9501	72.015	63.5381	66.241	3316	2319	1760	2934	2431	4053	3661	2127	3155	2620.62	2350.5	2507.17	2891.6	3153.84	2934.35	2891.56	2798.65	2874.07
Gm10282	1015.32	-0.349951	0.139234	-2.5134	0.0119575	0.185954	ENSMUSG00000070713	43.994	38.4152	39.5197	53.0286	60.9366	44.0258	48.1819	53.5872	54.5438	1162	808	598	1144	933	1276	1225	854	1298	904.61	835.133	831.869	1118.73	1254	910.045	953.865	1163.29	1166.31
Snhg10	105.74	-0.66923	0.266313	-2.51295	0.0119726	0.185985	ENSMUSG00000113722	13.0537	12.6437	7.84237	18.0865	19.3269	19.7878	15.9565	21.6608	14.1381	104	84	39	125	92	191	136	106	107	85.6139	87.5857	52.5938	121.637	126.773	130.444	100.682	149.931	96.3972
Gm9774	897.333	-0.356013	0.141728	-2.51194	0.012007	0.186117	ENSMUSG00000042165	28.4398	28.5029	28.6926	36.1926	36.4444	45.5876	34.1674	37.7955	31.5362	942	753	542	983	701	1656	1085	760	943	734.34	777.064	757.752	958.476	940.791	1182.6	848.707	1029.61	846.665
Ngrn	888.606	-0.305941	0.121796	-2.51192	0.0120075	0.186117	ENSMUSG00000047084	32.5947	25.9281	26.8406	33.4313	34.2186	35.4794	35.6135	37.1792	37.4115	1091	686	515	935	679	1295	1174	761	1143	857.533	720.48	722.056	901.892	900.364	938.197	901.4	1032.31	1023.22
Socs2	74.5382	1.12124	0.446593	2.51065	0.012051	0.186381	ENSMUSG00000020027	1.26474	3.78075	3.0525	1.07662	1.52775	1.51169	0.504011	1.13455	1.79493	76	185	86	34	45	99	29	41	77	52.7676	166.607	130.226	46.0604	63.7489	63.3936	20.2305	49.9569	77.8532
Prps2	1731.1	0.524094	0.208737	2.51079	0.0120462	0.186381	ENSMUSG00000025742	28.9875	22.3205	35.7269	20.8906	14.6575	16.8555	23.1268	18.8122	27.6138	2714	1681	1918	1629	794	1766	2044	1066	2325	2121.02	1724.99	2673.05	1567.42	1072.63	1239.63	1627.99	1452.72	2100.5
Raly	1203.77	0.560351	0.22328	2.50963	0.0120858	0.18651	ENSMUSG00000027593	53.4586	54.7073	34.9966	26.4683	41.7222	38.5041	21.9341	34.5149	33.183	2162	1702	819	832	971	1705	823	869	1232	1670.9	1806.04	1118.5	848.319	1304.23	1209.64	659.561	1138.54	1078.23
H3f3a	11802.5	0.391069	0.155826	2.50965	0.012085	0.18651	ENSMUSG00000060743	531.445	563.391	610.113	410.926	351.638	517.698	382.863	453.668	508.562	16396	13239	10565	10844	5995	18139	11168	8953	14039	12773	14302.1	14994.2	10127.2	8452.05	12506.2	8853.2	11507.8	12707.1
Neurl3	301.616	0.65953	0.262965	2.50805	0.01214	0.187141	ENSMUSG00000047180	7.33944	9.69825	6.98179	4.31119	3.45717	7.31817	4.5433	4.31766	6.78939	455	488	256	228	122	505	257	161	383	356.144	497.053	346.422	214.515	167.779	356.927	212.097	221.114	342.496
Ccr2	9.56234	3.34822	1.33534	2.50739	0.0121627	0.187266	ENSMUSG00000049103	0.341841	0.273178	0.2308	0	0	0.131097	0	0.031525	0	36	21	12	0	0	14	0	3	0	28.3574	24.1446	19.7486	0	0	11.0263	0	2.78409	0
Gm4544	66.7421	-0.971233	0.387402	-2.50704	0.0121746	0.187266	ENSMUSG00000116056	2.05369	2.01001	2.45329	4.37614	7.61735	2.53661	5.06631	3.28947	3.08962	51	33	25	95	97	74	128	43	74	37.4979	38.7631	45.8034	81.9335	139.101	46.5522	88.9947	63.3876	58.6461
Prkch	19.9894	2.47366	0.987858	2.50407	0.0122774	0.187625	ENSMUSG00000021108	0.344552	1.17619	0.228741	0.233865	0.128814	0.088307	0	0	0.189829	32	88	12	18	7	9	0	0	16	25.0402	90.2834	16.9982	17.428	9.36266	6.45048	0	0	14.3419
Pex16	845.742	-0.440613	0.175929	-2.5045	0.0122625	0.187625	ENSMUSG00000027222	29.5921	21.4592	29.3424	32.8618	47.782	28.7457	37.1814	36.2072	37.6368	941	541	539	866	884	1007	1125	721	1072	736.704	564.258	746.945	838.894	1189.69	719.291	890.52	951.301	974.073
Mrpl37	3220.34	-0.309868	0.123731	-2.50437	0.0122671	0.187625	ENSMUSG00000028622	109.435	75.548	100.186	122.044	128.836	110.031	121.129	115.49	115.71	4000	2242	2062	3643	2741	4488	4255	2538	3845	3124.97	2278.56	2925.32	3573.59	3679.42	3158.07	3327.66	3480.5	3434.97
Flna	1129.53	0.827549	0.330317	2.50531	0.0122343	0.187625	ENSMUSG00000031328	13.2739	25.7145	18.6045	4.47601	7.77898	15.1293	9.89799	14.7411	13.7819	1500	1691	925	524	418	1701	947	1010	1327	1067.21	2183.62	1529.48	369.012	625.499	1222.6	765.595	1250.8	1151.92
Cherp	4680.69	-0.346402	0.138336	-2.50406	0.0122778	0.187625	ENSMUSG00000052488	69.5318	58.8285	65.6298	82.2671	108.355	83.3445	82.0803	69.2984	74.0691	5636	3627	2867	4939	4515	6552	6016	3469	5409	4158.71	3716.31	4013.56	5045.23	6480.55	5010.04	4722.5	4374.16	4605.16
Med12l	19.4244	1.89803	0.757612	2.50528	0.0122356	0.187625	ENSMUSG00000056476	0.222596	0.718273	0.354166	0.048995	0.081734	0.211884	0.01068	0.17728	0.167804	24	57	21	4	6	36	1	11	15	19.1222	64.232	30.6619	4.25365	6.92092	18.1481	0.869965	15.8409	14.77
Igkc	26365.5	0.421984	0.16856	2.50346	0.0122985	0.187738	ENSMUSG00000076609	4360.22	3652.74	4998.74	3090.78	3086.6	2434.29	3304.78	3655.91	3999.43	40398	26130	27355	22505	16171	24750	30281	19644	32774	31137.3	27551.1	36501.4	22632.9	22044.8	17472.7	22704.7	27553.3	29691.6
Ctla2a	5.47496	4.01629	1.60511	2.5022	0.0123425	0.188004	ENSMUSG00000044258	1.12714	1.53731	0.637924	0	0	0	0	0.482441	0	21	24	5	0	0	0	0	4	0	14.1961	20.4503	8.21553	0	0	0	0	6.41271	0
9030025P20Rik	559.054	-0.347193	0.138735	-2.50256	0.0123297	0.188004	ENSMUSG00000116953	11.7316	9.68836	9.53076	13.0702	14.8955	12.1721	15.2881	12.8153	11.6389	671	478	312	579	496	804	799	438	605	524.549	457.107	434.991	599.345	665.972	547.118	657.761	604.164	540.474
Irf7	51.8217	1.28814	0.515365	2.49947	0.012438	0.189068	ENSMUSG00000025498	1.2459	3.18067	1.6997	0.479545	1.02157	0.371469	1.81211	0.558008	0.959869	67	122	56	20	30	26	66	21	40	50.2654	135.536	70.1189	19.8388	41.2198	15.0635	70.335	23.7593	40.2588
Gpr137b-ps	89.4691	0.944741	0.377982	2.49943	0.0124392	0.189068	ENSMUSG00000097715	2.45637	5.04827	3.50649	1.25125	1.23396	2.92616	1.68147	1.75727	2.75579	97	169	78	52	35	141	88	56	86	85.401	185.736	124.103	44.7111	43.0821	102.143	56.0856	64.1195	99.841
Nelfcd	2031.95	-0.392334	0.157103	-2.49731	0.012514	0.189208	ENSMUSG00000016253	41.8741	43.6515	47.46	60.5082	72.1667	43.1866	60.7347	61.3002	55.4472	2035	1598	1277	2379	2015	2159	2816	1786	2358	1547.31	1703.65	1793.23	2292.7	2667	1603.97	2159.09	2390.57	2129.98
Kif13a	57.8189	1.13321	0.453587	2.49833	0.0124778	0.189208	ENSMUSG00000021375	0.886531	0.740578	1.69957	0.44486	0.881615	0.218333	0.745844	0.337172	0.523009	111	68	90	47	24	35	44	24	63	70.0991	61.8495	137.415	36.0695	69.719	17.3521	56.737	28.1368	42.9921
Zmat3	571.227	0.697294	0.279223	2.49727	0.0125155	0.189208	ENSMUSG00000027663	6.4153	3.62031	5.89669	2.55566	2.4946	5.30743	2.48792	2.68506	4.19037	1135	579	641	375	204	982	447	335	737	908.522	541.516	853.891	371.125	353.324	755.471	338.965	401.308	616.926
Zfp300	6.54788	3.82926	1.53283	2.49816	0.012484	0.189208	ENSMUSG00000031079	0.008123	0.427084	0.201593	0.048939	0	0	0	0	0.035778	1	15	14	5	0	0	0	0	4	0.635981	35.3158	16.1384	3.92885	0	0	0	0	2.91196
Hnrnpul2	1234.96	0.390278	0.156268	2.49749	0.0125076	0.189208	ENSMUSG00000071659	15.4987	11.0257	14.1263	9.99425	10.9495	8.96976	9.31912	11.2289	11.9946	2100	1200	1076	1127	866	1327	1175	947	1481	1639.2	1231.17	1527.71	1083.89	1158.2	953.61	948.414	1253.38	1319.05
Hipk3	2781.72	0.363236	0.145485	2.49672	0.0125348	0.189296	ENSMUSG00000027177	23.5162	15.3549	22.2878	17.4141	16.8598	13.8573	16.0631	16.3592	15.2702	4729	2451	2527	2901	1975	3049	3040	2024	2794	3685.06	2541.39	3571.25	2798.18	2642.29	2182.58	2421.63	2705.49	2487.62
Tmem71	24.5941	1.69528	0.679165	2.49612	0.0125561	0.189416	ENSMUSG00000036944	0.904236	0.481532	0.82242	0.07803	0.044189	0.235433	0.284994	0.58657	0.142424	70	30	36	5	2	20	21	28	10	54.7467	30.7928	50.915	4.84433	2.67576	14.3271	16.6002	37.4802	8.96438
Lrrk2	333.549	0.797609	0.319662	2.49516	0.0125899	0.18952	ENSMUSG00000036273	8.42839	6.91724	14.763	3.65091	3.30327	5.53232	8.16955	7.66422	6.5611	558	358	331	214	155	265	350	241	458	382.158	331.267	684.463	169.745	149.794	252.127	356.366	366.752	309.269
Wdr25	153.392	0.704199	0.282209	2.49531	0.0125846	0.18952	ENSMUSG00000040877	9.06711	8.8313	4.81436	2.96649	5.15002	5.5408	5.15894	3.91189	5.60693	186	216	88	92	102	226	185	122	168	240.721	247.637	130.695	80.7579	136.743	147.854	131.767	109.607	154.75
Itga5	20.981	2.52778	1.01379	2.4934	0.0126528	0.189595	ENSMUSG00000000555	0.215319	1.54924	0.167897	0.083043	0	0.04709	0.380726	0.184234	0.028454	25	103	11	8	0	6	42	2	3	14.8059	112.518	11.8052	5.85538	0	3.25462	25.1864	13.37	2.03403
Ywhah	8150.31	-0.244672	0.098153	-2.49276	0.0126755	0.189595	ENSMUSG00000018965	218.956	197.174	209.219	277.021	249.916	237.928	276.815	233.103	224.928	9527	6877	5173	9916	6328	11343	11507	6196	8846	7434.22	7070.75	7263.45	9644.65	8486.34	8119.56	9041.92	8352.74	7939.17
Psat1	4659.08	-0.369204	0.148074	-2.49337	0.0126537	0.189595	ENSMUSG00000024640	103.598	85.2284	78.5018	130.857	111.641	122.495	141.385	104.006	89.4319	5617	3693	2294	6000	3718	7105	7301	3646	4522	4425.45	3845.38	3428.97	5731.95	4769.65	5259.45	5810.46	4688.89	3971.57
Inip	3589.54	-0.299119	0.119964	-2.49341	0.0126524	0.189595	ENSMUSG00000038544	76.933	74.8137	78.6578	105.632	109.768	87.9006	104.069	85.5078	81.6829	4060	3069	2247	4259	3174	4954	4867	2696	3740	3037.97	3120.32	3176.05	4277.25	4335.12	3488.8	3953.61	3563.54	3353.23
Spout1	2773.42	-0.439596	0.176337	-2.49293	0.0126694	0.189595	ENSMUSG00000039660	64.9985	49.3184	63.2918	90.7941	97.4494	56.1288	95.8199	74.2127	72.8554	3121	1869	1693	3557	2696	2932	4261	2155	3109	2403.36	1925.77	2393.53	3442.3	3604.43	2086.04	3408.98	2896	2800.37
Atrnl1	51.0222	1.28179	0.513912	2.49418	0.0126248	0.189595	ENSMUSG00000054843	0.530224	0.684578	0.550588	0.244338	0.038489	0.354657	0.225882	0.418125	0.17999	94	98	55	36	4	69	38	46	29	73.6143	100.386	78.1638	34.7851	5.34429	49.4911	30.1707	61.2655	25.9785
Kdm5a	4712.9	0.381126	0.153004	2.49096	0.01274	0.190358	ENSMUSG00000030180	32.9992	38.4111	40.0339	30.2954	27.9033	37.9	25.9462	25.3051	26.0302	6436	5291	3886	4299	3104	7444	5065	3091	4815	4821.85	5927.86	5981.15	4539.25	4077.8	5565.66	3646.85	3901.51	3954.15
Ms4a1	5700.72	0.472353	0.189698	2.49003	0.0127733	0.190653	ENSMUSG00000024673	91.137	116.611	122.358	63.118	62.5288	98.3143	77.6934	78.4903	101.493	7230	7380	5480	4137	2895	8547	5855	3840	7297	5643.26	7626.43	7747.16	4007.62	3872.29	6118.81	4628.28	5129.29	6533.33
Pacs1	1262	0.354983	0.142619	2.48904	0.012809	0.190983	ENSMUSG00000024855	15.7196	13.1654	15.4745	11.9067	11.2435	9.6478	11.698	11.5281	13.9494	1928	1350	1097	1225	801	1325	1348	896	1620	1532.27	1355.42	1542.36	1190.1	1096.1	945.229	1097	1185.93	1413.55
Ttc19	1305.64	-0.380692	0.153072	-2.487	0.0128824	0.191069	ENSMUSG00000042298	33.3022	34.382	29.5187	45.4085	47.8986	49.6465	45.5443	36.1982	32.3242	1460	1146	741	1437	1064	2217	1797	973	1315	1087.65	1186.03	985.803	1520.73	1564.56	1629.75	1431.04	1247.7	1097.51
Grap2	118.721	1.16704	0.469053	2.48808	0.0128434	0.191069	ENSMUSG00000042351	1.20772	3.93603	1.63828	1.104	0.407872	0.522116	1.66419	1.38842	1.08049	131	166	100	109	35	73	148	65	129	97.0651	334.121	134.637	90.9844	32.785	42.1774	128.677	117.767	90.2782
Flad1	1572.7	-0.32621	0.131137	-2.48756	0.0128622	0.191069	ENSMUSG00000042642	31.1362	25.9143	27.9408	32.2692	45.0361	34.8696	35.768	35.0447	32.7371	1911	1177	999	1592	1462	2248	2059	1248	1784	1441.74	1267.12	1323.04	1532.24	2085.8	1622.83	1593.11	1712.88	1575.55
Ap1s3	103.051	0.794757	0.319521	2.48734	0.0128704	0.191069	ENSMUSG00000054702	1.89759	3.47391	2.1742	1.3011	1.08211	2.12639	1.13086	1.61584	1.55004	141	182	88	80	47	148	80	74	94	105.082	203.184	123.112	73.8809	59.9307	118.354	60.2466	94.4343	89.234
E130102H24Rik	82.4055	1.6315	0.655644	2.48839	0.0128324	0.191069	ENSMUSG00000086782	3.85476	31.2363	1.83349	4.30219	3.71037	6.36115	5.53115	2.25866	2.60328	58	369	16	52	32	105	81	20	35	44.9165	384.428	21.8455	51.404	43.2393	74.5006	62.0047	27.7757	31.5349
Nr2f6	346.864	-0.513908	0.206732	-2.48587	0.0129236	0.191178	ENSMUSG00000002393	9.18581	6.33344	6.6844	11.6238	11.2412	7.59021	14.0074	9.77838	10.0406	436	241	200	408	286	360	550	273	430	326.845	238.271	242.867	424.041	400.504	271.454	478.805	367.375	371.614
Fchsd2	3055.15	0.252008	0.101384	2.48568	0.0129304	0.191178	ENSMUSG00000030691	43.5019	46.2837	43.2968	36.2777	37.2683	42.6728	37.8754	34.6595	37.563	4085	3356	2449	2831	2064	4532	3439	2099	3454	3267.35	3671.66	3325.21	2794	2799.5	3221.47	2736.81	2747.36	2932.99
Cdc14a	410.134	0.445364	0.179159	2.48586	0.012924	0.191178	ENSMUSG00000033502	4.48299	5.09568	6.65421	3.90212	3.29558	3.85876	4.27074	4.49577	4.20893	515	474	444	379	200	487	473	323	448	402.875	483.673	611.47	359.585	296.202	348.55	369.238	426.396	393.221
Socs5	438.855	0.333715	0.134304	2.48478	0.0129632	0.191462	ENSMUSG00000037104	5.8487	5.80438	5.36796	4.46734	4.09534	4.72947	4.7308	4.99789	4.32119	600	492	360	427	271	581	539	330	441	510.885	535.509	479.456	400.139	357.772	415.233	397.556	460.741	392.4
Rcan3	101.655	0.975142	0.392533	2.48423	0.0129831	0.191556	ENSMUSG00000059713	1.81221	1.41037	1.14454	0.99819	0.338023	0.521315	0.54066	0.828566	1.23177	232	120	88	113	27	78	70	70	131	183.549	150.877	118.536	103.67	34.2407	53.071	52.6827	88.5678	129.699
Nufip2	2708.15	0.516437	0.207972	2.4832	0.0130207	0.191908	ENSMUSG00000037857	34.261	33.6648	27.8747	15.6205	18.5579	34.2159	22.9876	22.2374	22.0217	4565	3596	2108	1662	1437	4995	2898	1787	2661	3541.88	3675.84	2946.58	1655.87	1918.73	3555.3	2286.27	2426.18	2366.72
Zfand4	26.1114	2.22806	0.897444	2.48267	0.01304	0.191994	ENSMUSG00000042213	0.53227	3.60783	0.204256	0.056411	0.273374	0.932676	0.121414	0.338028	0.184029	29	90	5	2	9	41	5	8	14	19.2874	138.082	7.5682	2.09607	9.90724	33.9694	4.23264	12.9271	6.93252
Tspyl4	20.8233	1.99546	0.80423	2.4812	0.013094	0.19227	ENSMUSG00000039485	0.59614	0.293814	1.52999	0.035421	0.183095	0.28853	0.40372	0.035654	0.183082	12	24	10	3	11	32	39	2	17	30.4223	16.1923	82.0195	1.90997	9.67619	15.0891	20.3201	1.75744	10.0227
Cope	4473.88	-0.292242	0.117757	-2.48174	0.0130743	0.19227	ENSMUSG00000055681	175.899	159.68	154.134	189.258	235.136	174.689	205.967	208.904	199.194	5340	3763	2586	4578	4088	5726	5839	3788	5439	4087.63	3919.29	3662.56	4509.84	5464.87	4080.28	4604.76	5123.44	4812.23
Gm49553	3.99454	3.30915	1.33377	2.48105	0.0130997	0.19227	ENSMUSG00000116433	0.32902	0.33335	0.108701	0	0	0.074962	0.043069	0.033574	0	16	13	3	0	0	4	2	1	0	12.524	13.402	4.23088	0	0	2.868	1.57721	1.34874	0
Gm43513	145.407	0.477163	0.192386	2.48023	0.0131298	0.192511	ENSMUSG00000105607	8.9969	8.68871	9.96362	5.94929	7.45535	5.80408	7.54972	6.42107	7.03048	219	168	139	118	105	155	177	94	154	170.386	173.798	192.946	115.533	141.209	110.482	137.554	128.338	138.417
Ep300	2374.55	0.541961	0.218606	2.47917	0.0131687	0.192882	ENSMUSG00000055024	17.4105	22.6859	14.0818	10.7857	9.78229	19.27	12.134	11.7622	11.8148	3507	3041	1848	2014	1186	4089	2274	1640	2329	2811.28	3869	2325.03	1785.83	1579.75	3127.45	1884.94	2004.41	1983.27
Mgat4b	232.52	0.783893	0.316325	2.47812	0.0132075	0.193249	ENSMUSG00000036620	5.23344	13.2586	4.65672	4.33505	3.59662	4.80468	4.83043	4.64808	5.19862	259	448	147	193	130	248	241	161	230	211.315	565.442	192.265	179.489	145.242	194.995	187.642	198.072	218.22
Rprd2	1240.27	0.33885	0.136757	2.47775	0.0132213	0.193251	ENSMUSG00000028106	13.361	14.5065	13.4471	12.3005	9.1906	9.96958	11.725	11.7789	11.1162	1735	1444	1107	1206	685	1532	1407	1011	1259	1361.7	1561.54	1401.35	1285.47	936.782	1021.25	1149.62	1266.93	1177.77
Mief2	311.823	-0.484726	0.195694	-2.47696	0.0132508	0.19328	ENSMUSG00000018599	5.38237	5.25076	5.08334	5.83642	9.46175	9.07598	6.59767	7.0466	6.60418	328	239	174	294	291	570	372	261	353	246.229	253.709	237.788	273.786	432.903	417.325	290.373	340.213	314.084
Trim56	504.903	0.407551	0.164518	2.47724	0.0132403	0.19328	ENSMUSG00000043279	3.13048	2.60868	3.36863	1.96515	2.344	1.88803	2.72393	2.3878	2.56588	776	518	478	412	320	509	651	374	588	608.037	535.166	669.035	391.394	455.334	368.59	508.998	489.468	518.105
Helz2	1551.62	0.511363	0.206617	2.47494	0.013326	0.193904	ENSMUSG00000027580	7.29052	10.6242	9.80767	5.53998	6.40193	8.82952	4.82311	6.40197	7.37922	1922	2259	1422	1203	970	2518	1170	1050	1723	1484.82	2285.39	2042.47	1156.97	1304	1807.45	945.024	1376.05	1562.38
Tmem214	3689.67	-0.3709	0.149877	-2.4747	0.0133348	0.193904	ENSMUSG00000038828	57.0258	48.1283	55.2431	70.689	93.2172	58.4602	69.7608	65.8169	61.7272	4087	2797	2139	4164	3955	4707	4915	2967	4015	3212.09	2863.17	3182.08	4082.49	5251.17	3309.74	3779.67	3912	3614.63
B230217O12Rik	88.1393	1.44992	0.58576	2.47528	0.0133131	0.193904	ENSMUSG00000097785	1.74772	11.2767	1.1414	2.09525	2.04239	1.90078	2.44959	1.43228	0.8292	70	344	26	69	48	83	93	35	29	54.0563	367.856	36.0986	66.4523	63.6909	59.0912	72.5915	46.7531	26.6641
Mzb1	1470.73	0.629906	0.254591	2.47419	0.0133538	0.193981	ENSMUSG00000024353	132.333	116.34	136.005	51.1743	61.4011	113.166	63.51	101.004	109.789	2511	1762	1493	775	649	2386	1163	1112	1864	1938.17	1799.7	2036.82	768.553	899.398	1665.93	894.883	1561.24	1671.85
Sf1	9056.19	0.373174	0.150971	2.47184	0.0134421	0.195063	ENSMUSG00000024949	170.41	230.93	175.72	148.165	138.43	183.708	137.416	142.599	153.358	11852	12070	6856	8717	5615	14100	9122	6005	9586	9191.3	13155.5	9691.21	8194.52	7467.33	9959.2	7130.46	8117.15	8599.01
Cops6	12759.6	-0.440441	0.178253	-2.47087	0.0134785	0.19519	ENSMUSG00000019494	478.844	346.581	453.704	637.188	711.484	386.119	641.58	583.252	545.014	14240	8617	7577	15730	12720	12830	18247	11030	15063	11311.7	8647.37	10959.2	15434.7	16809.3	9167.85	14580.9	14541	13384.5
Pusl1	1350.64	-0.44762	0.181153	-2.47095	0.0134755	0.19519	ENSMUSG00000051557	72.6259	58.1193	53.3076	98.1203	102.736	61.0856	90.9163	84.4933	70.7724	1627	1008	705	1761	1246	1482	1944	1139	1460	1254.79	1061.17	941.565	1738.37	1775.38	1061.21	1511.39	1540.7	1271.16
Map3k3	890.42	0.419742	0.169937	2.46999	0.0135118	0.19547	ENSMUSG00000020700	15.8605	21.0822	16.2764	15.9878	13.5926	10.7294	13.0044	14.041	13.2917	1284	1125	675	1000	574	915	962	662	908	929.854	1305.45	975.735	961.14	796.993	632.25	733.481	868.769	810.107
H2bc4	23.303	2.18042	0.883053	2.46918	0.0135422	0.19571	ENSMUSG00000018102	1.08972	5.50386	0.131591	0.184455	0.324923	0.2402	0.37708	0.811279	1.08669	29	116	2	4	5	7	10	13	26	22.5772	119.889	2.78254	3.91135	6.72002	4.99258	7.78758	17.7057	23.3617
Spty2d1	1662.43	0.541569	0.219433	2.46804	0.0135856	0.196137	ENSMUSG00000049516	14.4282	27.9619	15.5029	14.3797	13.5178	16.7318	14.3196	10.7462	11.5088	1954	2917	1171	1607	1072	2470	1837	905	1437	1520.27	3112.57	1670.5	1553.84	1424.68	1771.84	1451.77	1195.13	1261.22
Ppa1	9150.04	-0.318228	0.129017	-2.46656	0.0136418	0.196545	ENSMUSG00000020089	342.722	259.696	317.734	429.5	427.5	321.936	414.513	365.991	358.207	11011	6694	5789	11351	7998	11314	12697	7097	10399	8576.21	6863.82	8130.04	11020.8	10699	8097.24	9979.11	9665.61	9318.55
Entpd4b	419.334	-0.949444	0.384926	-2.46656	0.0136416	0.196545	ENSMUSG00000022066	1.29357	4.07754	5.33598	6.21909	7.15019	5.21511	4.59734	6.20286	12.4394	91	302	284	481	387	507	407	361	1046	90.6866	302.795	383.592	447.992	501.788	368.167	310.832	460.055	908.099
Atmin	2473.09	-0.34702	0.140735	-2.46578	0.0136717	0.196775	ENSMUSG00000047388	24.9833	16.3055	19.1297	27.5164	24.0203	27.8258	27.8619	25.6238	22.2655	3244	1708	1401	2966	1827	3965	3436	2061	2626	2539.53	1750.59	1988.32	2868.1	2441.94	2842.93	2724.67	2748.87	2352.87
Tomm40	8066.4	-0.33223	0.134765	-2.46526	0.0136915	0.196859	ENSMUSG00000002984	244.963	208.343	240.986	292.418	361.039	234.261	318.414	278.993	283.124	9144	6217	5072	8984	7662	9462	11270	6392	9655	7104.98	6382.31	7147.44	8697.66	10473.1	6829.23	8885.16	8540.31	8537.36
Tmem87a	333.75	0.639352	0.259399	2.46474	0.0137111	0.19694	ENSMUSG00000033808	5.5883	8.84379	4.67905	4.92409	2.93576	5.58455	4.32005	3.80609	3.39142	478	628	218	350	146	541	326	201	271	372.687	623.092	319.886	336.98	196.012	374.595	277.455	267.848	235.194
Sec11a	5538.06	-0.339955	0.137987	-2.46368	0.0137519	0.197325	ENSMUSG00000025724	198.973	176.279	192.221	275.12	272.158	187.204	261.38	238.832	218.183	6195	4364	3348	6921	4951	6411	7893	4568	6141	4827.02	4516.83	4768.29	6843.94	6603.91	4564.68	6100.4	6114.84	5502.61
Sec24a	1522.8	0.676512	0.274672	2.46298	0.0137788	0.19751	ENSMUSG00000036391	10.7492	26.4028	10.6557	9.59127	8.92855	13.9475	10.9365	9.33724	8.46391	1703	2953	998	1281	806	2394	1627	929	1254	1321.41	3428.15	1339.43	1209.03	1097.73	1723.35	1293.03	1211.4	1081.67
Tbc1d9	21.3934	2.12568	0.863274	2.46234	0.0138032	0.197659	ENSMUSG00000031709	0.43599	0.873452	0.186648	0	0.119743	0.177731	0.025672	0.226389	0.154456	32	99	15	0	10	7	3	20	20	36.9482	78.1816	16.174	0	10.1489	15.1389	2.09305	20.2479	13.6077
Vdac2	10990	-0.339154	0.137801	-2.46118	0.0138481	0.198035	ENSMUSG00000021771	296.989	232.702	292.219	366.245	413.508	282.914	392.525	334.355	312.997	12838	8002	7247	12613	10049	13607	15352	8793	12109	9887.54	8182.66	9947.97	12503.1	13768.4	9467.1	12572.4	11747.9	10833
Gm47503	10.8265	-1.90443	0.773866	-2.46093	0.0138576	0.198035	ENSMUSG00000111491	0.052992	0.037534	0.013423	0.155018	0.12923	0.186257	0.119569	0.183296	0.050005	7	4	1	17	10	27	15	15	6	5.48	4.0996	1.41934	16.4381	13.3655	19.3596	11.8956	20.0045	5.37586
Evi2b	209.157	0.583525	0.237164	2.46043	0.0138771	0.198114	ENSMUSG00000093938	6.35053	6.20966	9.39596	4.49258	4.33364	5.58451	5.53206	3.37845	6.18198	292	229	246	170	116	282	243	95	258	228.004	235.629	345.892	165.247	155.447	201.701	191.07	127.946	231.475
Map1lc3a	38.4002	1.20495	0.489841	2.45988	0.0138984	0.198124	ENSMUSG00000027602	2.59019	5.98843	1.71437	1.51487	1.97671	2.03385	0.863908	1.63801	1.13964	48	104	22	22	29	49	19	25	26	44.7869	109.366	30.3111	26.8593	34.1835	35.3471	14.3711	29.8911	20.4857
Trmt5	842.362	-0.390457	0.158743	-2.45968	0.0139059	0.198124	ENSMUSG00000034442	26.2603	16.4606	21.4324	28.8378	28.1409	26.0549	34.3933	28.0121	24.3958	997	620	510	1040	626	1089	1308	692	921	838.338	555.023	699.624	944.017	898.483	836.031	1056.31	943.78	809.647
Arih1	4630.05	0.431955	0.175705	2.45842	0.0139551	0.198625	ENSMUSG00000025234	46.8771	72.7164	44.1011	37.7504	46.3756	46.3505	42.6717	34.6225	39.327	6582	6127	3750	3651	3240	6861	4715	2933	4677	4662.82	7639.54	4485.52	3850.41	4613.49	4634.01	4083.45	3634.56	4066.68
Cd247	17.7527	1.65394	0.673161	2.45698	0.0140111	0.19922	ENSMUSG00000005763	0.957541	3.20034	0.767316	0.451102	0.201127	0.907455	0.65979	0.286161	0.613474	31	80	13	8	2	24	12	5	14	18.7805	64.8756	14.9964	8.49939	3.88291	17.6065	12.3635	6.40993	12.36
Tead2	56.549	-1.06969	0.435574	-2.45582	0.0140564	0.199516	ENSMUSG00000030796	0.761016	0.923174	1.07479	0.8098	1.5907	3.48362	1.9927	1.69431	2.08501	41	34	26	36	50	157	69	51	58	26.4728	33.9186	38.2301	28.8857	55.341	121.801	66.6882	62.2021	75.4009
Tmem183a	4952.27	-0.386165	0.157251	-2.45572	0.0140602	0.199516	ENSMUSG00000042305	86.3006	64.0358	81.2363	110.53	115.75	81.3834	121.694	101.796	80.983	5778	3515	3310	6120	4064	6168	7508	3980	4998	4490.36	3519.15	4322.09	5897.2	6023.41	4256.16	6091.68	5589.92	4380.49
Capn10	274.769	-0.644735	0.26287	-2.45268	0.0141797	0.20101	ENSMUSG00000026270	4.92371	3.36841	7.29722	6.92088	11.5661	9.35132	8.22745	6.65916	6.31236	268	148	182	279	302	468	387	191	272	186.064	134.072	281.7	267.749	436.563	355.338	298.806	265.012	247.617
Ggta1	308.634	0.575398	0.234668	2.45196	0.014208	0.201208	ENSMUSG00000035778	4.59384	5.87058	6.90472	2.90872	3.68879	5.15292	3.07424	4.37877	4.31812	389	401	340	208	182	465	252	233	326	305.464	412.298	469.467	198.328	245.313	344.391	196.663	307.285	298.497
Tm2d3	1462.65	-0.40749	0.166237	-2.45126	0.0142357	0.201398	ENSMUSG00000078681	97.5855	69.8204	75.5707	123.246	113.9	79.5559	110.892	116.758	105.953	1824	1045	796	1864	1246	1607	2011	1344	1698	1413.33	1068.05	1119.15	1830.34	1649.83	1158.1	1545.12	1784.65	1595.24
Plekhm1	257.047	0.650173	0.265299	2.45072	0.0142572	0.201501	ENSMUSG00000034247	1.96715	3.41627	2.55945	1.45825	1.84337	1.29177	1.34877	2.15273	2.16486	315	418	231	194	173	227	205	205	315	244.015	447.588	324.639	185.485	228.689	161.057	160.96	281.821	279.172
Nbn	3725.42	-0.304142	0.124158	-2.44963	0.0143002	0.201704	ENSMUSG00000028224	67.7946	53.383	65.1646	85.8271	85.3312	69.1103	85.4855	71.7273	67.7997	4392	2780	2390	4596	3229	4913	5277	2859	3981	3433.39	2855.47	3374.54	4457.08	4322.03	3517.91	4165.05	3833.7	3569.58
mt-Co1	107088	0.348055	0.142071	2.44986	0.014291	0.201704	ENSMUSG00000064351	3626.7	4417.89	4467.57	2972.82	2829.07	4102.08	3645.22	3073.35	3325.09	135493	131983	95007	91227	61479	168154	130384	69942	112236	105699	135995	133139	88843.5	82462.6	120165	102208	94531.9	100745
Med29	839.922	-0.354929	0.144934	-2.44889	0.0143296	0.201728	ENSMUSG00000003444	34.3634	25.8123	28.3994	39.9951	42.1773	31.229	37.9449	37.7177	39.9126	1032	618	487	983	735	1029	1094	686	1081	804.091	637.944	679.507	959.652	987.053	734.482	854.206	931.45	970.915
Asb6	1259.64	-0.348639	0.142367	-2.44887	0.0143305	0.201728	ENSMUSG00000039483	24.9079	22.6923	23.1599	29.3883	39.3754	30.4704	30.7292	27.7465	25.0325	1403	1041	724	1366	1160	2029	1605	960	1370	1096.31	1054.92	1042.34	1326.38	1733.29	1347.99	1301.21	1288.87	1145.41
Stk16	1881.53	-0.278048	0.113622	-2.44713	0.0143999	0.202503	ENSMUSG00000026201	90.9353	83.6804	87.6689	95.9215	126.588	101.868	116.008	97.04	106.883	2208	1598	1214	1858	1658	2640	2544	1363	2309	1670.85	1624.19	1647.44	1807.47	2326.88	1881.49	2051.02	1882.37	2042.04
Son	23368.1	0.323278	0.132285	2.4438	0.0145334	0.203898	ENSMUSG00000022961	220.858	281.868	239.364	192.76	182.661	237.202	224.516	177.302	190.698	28587	29864	15662	22918	16746	33634	28369	15900	24160	23418.4	31567.3	25952.5	20958.5	19370.6	25280.1	22903.1	19841	21021
Drap1	3925.55	-0.298362	0.122116	-2.44327	0.0145549	0.203898	ENSMUSG00000024914	243.291	202.202	255.034	284.588	314.192	247.801	288.543	306.99	296.714	4402	2950	2568	4191	3343	5073	5009	3485	4964	3462.01	3039.03	3710.87	4152.57	4471.46	3544.21	3950.14	4610.33	4389.36
Trappc4	3473.42	-0.259059	0.106048	-2.44286	0.0145714	0.203898	ENSMUSG00000032112	179.835	152.338	188.372	209.203	226.329	188.197	218.342	211.059	205.697	3963	2619	2394	3766	2931	4705	4680	2840	4083	3105.83	2779.27	3326.66	3704.62	3909.53	3266.78	3627.99	3846.43	3693.62
Tmem60	1096.39	-0.434123	0.177682	-2.44325	0.0145555	0.203898	ENSMUSG00000045435	45.5029	35.2373	43.909	58.771	62.0634	40.0996	74.8928	52.4039	52.8115	1214	776	670	1286	966	1188	1922	839	1261	950.228	777.211	937.6	1258.49	1296.21	841.673	1504.63	1154.94	1146.51
Ighv9-1	28.4991	0.985544	0.403431	2.44291	0.0145695	0.203898	ENSMUSG00000096805	13.29	13.0354	13.2954	10.0372	4.80704	6.578	5.88388	5.88779	7.18581	50	44	31	34	12	23	22	16	28	42.0517	43.189	42.6464	32.1011	15.0811	20.7401	17.7569	19.4922	23.4337
Zfp654	779.429	0.393307	0.161153	2.44058	0.0146636	0.204985	ENSMUSG00000047141	6.192	7.73532	8.33711	5.50768	5.49543	6.16428	6.83536	4.35868	6.01158	937	945	689	712	542	1023	991	455	844	753.416	994.098	1037.28	687.18	668.742	753.877	800.138	559.713	760.421
Pcyt2	4578.87	-0.413179	0.169403	-2.43903	0.0147268	0.205317	ENSMUSG00000025137	149.314	133.125	131.798	192.239	246.128	132.02	205.731	175.923	165.298	5146	3570	2615	5452	4726	4726	6676	3672	5140	3954.25	3723.66	3569.03	5220.41	6518.94	3514.14	5241.61	4916.92	4550.85
Sp4	555.265	0.53378	0.218881	2.43868	0.0147409	0.205317	ENSMUSG00000025323	4.72413	7.50445	5.30396	4.3163	2.85775	5.37346	4.19496	3.70937	4.12578	713	879	425	541	249	889	600	337	564	549.049	921.203	630.327	514.398	332.175	627.709	469.049	454.983	498.491
Mgat4a	555.397	0.523276	0.214536	2.4391	0.0147237	0.205317	ENSMUSG00000026110	5.63854	6.28573	5.63471	2.40251	4.95837	3.9173	4.23798	4.38511	4.87704	876	647	547	336	387	644	608	361	651	652.811	768.641	667.065	285.222	574.133	455.85	472.041	535.806	587.001
Pgam5	3550.89	-0.264143	0.10832	-2.43855	0.0147465	0.205317	ENSMUSG00000029500	82.9298	70.2089	75.6695	101.603	92.5661	89.323	106.726	82.2529	83.8212	4250	2830	2216	4319	2765	5039	5220	2596	3918	3322.7	2971.12	3100.11	4174.33	3709.24	3597.15	4113.88	3478.07	3491.38
Tent5a	194.487	0.876273	0.359392	2.43821	0.0147601	0.205317	ENSMUSG00000032265	1.11383	4.17917	1.6292	1.16527	1.34351	1.71219	1.19792	1.22629	1.08545	165	501	135	144	116	281	172	115	145	129.73	514.112	194.031	139.17	156.5	200.441	134.23	150.737	131.429
Ap4s1	900.881	-0.431996	0.177236	-2.43741	0.0147928	0.205511	ENSMUSG00000020955	41.2948	32.8404	46.8914	62.2904	54.8463	40.5147	52.8851	61.5223	56.8901	943	585	619	1159	725	1012	1154	840	1154	730.516	613.608	848.21	1129.94	970.365	720.381	900.053	1148.61	1046.25
Rora	17.6827	2.86496	1.17554	2.43716	0.0148032	0.205511	ENSMUSG00000032238	0.033736	1.02472	0.107889	0.036435	0.206257	0.003074	0.063237	0	0.050912	10	91	18	2	8	1	4	0	4	3.38337	108.543	11.0639	3.74693	20.6879	0.309874	6.10136	0	5.30786
9930111J21Rik2	211.759	1.17025	0.480276	2.43662	0.0148254	0.205617	ENSMUSG00000069892	2.05475	4.91346	1.77587	0.687166	0.481481	2.57747	1.38032	0.748238	2.03846	296	611	161	76	33	426	191	66	261	229.104	579.014	202.955	78.8169	53.8411	289.063	148.504	88.3747	236.158
Fem1c	1057.47	0.302803	0.124307	2.43592	0.014854	0.205721	ENSMUSG00000033319	9.99919	9.81197	9.65549	8.8201	6.85176	8.66021	7.85544	7.81047	8.26451	1534	1215	835	1124	616	1458	1144	743	1152	1201.13	1244.89	1185.98	1086.42	823.155	1045.61	907.816	990.17	1032.06
Wdr18	6601.61	-0.415033	0.170394	-2.43572	0.0148621	0.205721	ENSMUSG00000035754	114.328	102.618	113.259	136.387	197.706	105.802	175.191	138.296	138.922	7366	4611	3682	7159	7043	6951	9932	5598	8109	5471.98	5187.57	5542.92	6693.64	9463.77	5089.76	8066.85	6985.63	6912.33
Cnksr3	51.3031	1.24222	0.510277	2.43441	0.0149161	0.206267	ENSMUSG00000015202	0.642029	2.45578	0.785955	0.504425	0.701503	0.515505	0.256569	0.827324	0.568825	49	148	33	29	37	51	22	35	41	39.5902	159.945	49.5572	31.8954	43.2629	31.9508	15.2208	53.8413	36.4648
Ly96	163.873	0.616579	0.253315	2.43404	0.0149312	0.206273	ENSMUSG00000025779	22.6267	22.0906	22.369	14.0941	10.9306	20.1088	13.1763	10.8105	18.8732	274	209	158	135	75	265	156	76	203	211.032	217.612	213.329	134.791	101.959	188.507	118.228	106.409	182.993
Ddx56	7060.36	-0.362922	0.149141	-2.43341	0.0149573	0.206363	ENSMUSG00000004393	199.514	151.525	173.19	241.61	278.913	184.387	259.934	204.5	194.919	8446	5206	4224	8402	6700	8456	10317	5440	7704	6612.64	5304.36	5869.48	8211.34	9245.31	6142.51	8288.27	7153.2	6716.1
Yif1a	1770.74	-0.343059	0.140992	-2.43318	0.014967	0.206363	ENSMUSG00000024875	74.3446	64.0186	74.1564	92.7366	102.11	69.3129	94.0174	95.8437	90.7397	2034	1342	1103	2007	1539	2072	2300	1576	2205	1537.5	1398.36	1568.16	1966.59	2111.96	1440.77	1870.57	2091.87	1950.85
Tmc7	5.31057	4.7377	1.94768	2.43249	0.0149955	0.206554	ENSMUSG00000042246	0	0.226077	0.220348	0	0	0	0	0.040159	0	0	22	15	0	0	0	0	3	0	0	22.5334	21.2621	0	0	0	0	3.99954	0
Rab8a	5446.3	-0.298111	0.122603	-2.43152	0.0150355	0.206903	ENSMUSG00000003037	74.3732	59.3736	63.3026	84.6364	83.4344	71.1321	100.27	76.5054	74.4812	6356	4387	3504	6119	4587	6881	7698	4194	6412	5221.5	4402.71	4544.4	6093.04	5858.37	5019.48	6772.52	5668.62	5436.1
Cpsf4	1530.02	-0.295264	0.121588	-2.4284	0.0151657	0.208492	ENSMUSG00000029625	46.8137	39.8714	37.7365	51.6781	54.9196	46.1556	60.3464	45.4702	50.8967	1874	1282	861	1686	1272	2047	2293	1113	1852	1462.49	1315.62	1205.47	1655.49	1715.93	1449.3	1813.73	1499.18	1653
Syne4	82.71	-0.815884	0.3362	-2.42678	0.0152335	0.20922	ENSMUSG00000019737	5.2005	2.60105	1.8137	4.75454	7.06836	5.7021	5.10245	6.08561	5.90963	100	44	21	85	87	145	125	79	97	86.1163	45.4921	30.7102	80.7324	117.061	94.9052	81.2868	106.353	101.733
Nbas	504.246	0.549761	0.226749	2.42453	0.0153281	0.21011	ENSMUSG00000020576	5.92694	6.83994	8.1725	4.2924	3.88515	7.51696	4.81397	3.73086	4.67828	910	635	458	415	290	907	396	257	507	529.664	645.608	746.793	393.34	347.24	675.19	413.879	351.872	434.628
Il6ra	105.286	0.868186	0.358032	2.42489	0.0153132	0.21011	ENSMUSG00000027947	1.77144	2.0058	1.07629	1.12755	1.16276	0.84322	0.748013	0.37756	1.16556	191	187	70	100	70	143	78	28	120	159.969	191.416	100.036	104.463	105.016	76.2798	64.9861	35.9835	109.425
Iqgap1	14111.8	0.296651	0.122396	2.42369	0.0153638	0.210188	ENSMUSG00000030536	123.046	110.414	105.18	94.5185	79.3295	109.181	89.1873	90.8608	93.9375	22581	15729	11025	13954	7848	20777	14952	10083	15261	17124.8	16230.5	14968.1	13488.9	11042	15272.8	11941.7	13345.7	13591.3
Nmrk1	221.412	0.398985	0.164611	2.4238	0.015359	0.210188	ENSMUSG00000037847	8.39587	8.35649	7.96706	5.35593	7.19021	6.51532	7.18891	5.68941	6.10629	345	247	194	177	154	288	285	143	218	261.95	275.375	254.172	171.351	224.361	204.317	215.782	187.338	198.058
Pdcd7	1193.37	-0.29488	0.121683	-2.42334	0.0153785	0.210188	ENSMUSG00000041837	23.5315	19.1054	20.3449	29.0111	27.0413	22.8051	27.2754	25.0752	25.0731	1450	946	710	1477	973	1542	1602	950	1400	1133.35	971.896	1001.95	1432.78	1302.56	1103.98	1263.83	1274.58	1255.41
Nrp2	36.2009	1.31187	0.54205	2.4202	0.0155119	0.211397	ENSMUSG00000025969	0.369192	0.776435	0.296173	0.364903	0.080042	0.132772	0.193806	0.292436	0.133417	64	98	29	39	8	25	33	18	18	44.3275	98.4631	36.3615	44.9258	9.61147	16.0229	22.3866	37.056	16.6531
Rps19bp1	2586.54	-0.312096	0.128944	-2.4204	0.0155034	0.211397	ENSMUSG00000051518	170.634	150.379	160.246	194.121	218.738	175.926	190.071	233.495	194.22	2980	2043	1613	2750	2193	3382	3252	2431	3007	2310.54	2150.7	2218.76	2695.36	2962.27	2394.37	2476.06	3336.81	2734.03
Zfp709	208.813	0.660148	0.272751	2.42033	0.0155062	0.211397	ENSMUSG00000056019	2.9552	1.7209	3.63881	1.27419	2.28497	1.7291	2.03656	1.26245	2.03172	300	161	200	164	157	208	226	152	262	288.85	177.659	363.681	127.708	223.367	169.872	191.506	130.229	206.448
Clec4a1	7.01054	2.75033	1.13707	2.41879	0.0155723	0.212015	ENSMUSG00000049037	0.185575	0.795578	0.605531	0.096812	0	0.096646	0	0.261068	0.02934	7	24	13	3	0	4	0	6	1	5.45236	24.6886	18.1919	2.91671	0	2.85406	0	8.09516	0.896173
Kidins220	460.028	0.513404	0.212306	2.41822	0.0155965	0.21214	ENSMUSG00000036333	3.83633	4.22182	4.53254	2.61528	3.19813	3.74839	1.95944	2.88467	3.38199	695	542	390	367	275	764	296	348	595	511.983	595.095	618.524	357.895	426.862	502.804	251.578	406.295	469.217
Aff1	995.722	0.653514	0.270508	2.41587	0.0156976	0.213308	ENSMUSG00000029313	7.47518	14.0351	6.56818	4.36165	4.94636	9.11991	6.07418	6.48097	5.39367	1389	2027	704	643	431	1825	891	664	908	1016.64	2016.1	913.416	608.272	672.801	1246.67	794.76	930.237	762.596
Arfgef2	1223.87	0.38153	0.158004	2.41468	0.0157489	0.2138	ENSMUSG00000074582	7.42312	9.30647	6.31869	5.43778	5.12407	6.60324	6.40122	6.24716	6.0875	1766	1789	831	1076	715	1724	1411	870	1248	1359.76	1800.56	1183.53	1021.4	938.737	1215.76	1128.08	1207.72	1159.25
Gm43681	108.19	2.00277	0.829838	2.41345	0.0158024	0.21432	ENSMUSG00000106870	2.19888	13.1067	1.52701	0.615839	0.906835	3.44908	2.05864	0.759818	0.934589	104	497	41	24	25	179	93	22	40	81.2154	511.304	57.6706	23.324	33.498	128.043	73.1507	29.6178	35.8856
Prss16	27.2119	1.33703	0.554541	2.41105	0.0159066	0.215047	ENSMUSG00000006179	0.527812	1.95531	1.11068	0.672937	0.662934	0.373107	0.270285	0.300153	0.60847	30	53	27	22	21	18	14	10	27	19.3913	75.8735	41.7246	25.3513	24.3585	13.7776	9.55321	11.6379	23.2396
Ly6c2	8.68132	2.61008	1.0832	2.4096	0.0159702	0.215047	ENSMUSG00000022584	2.08166	1.24709	0.734392	0	0.345019	0.368955	0.107304	0.58546	0.016018	36	17	5	0	3	7	1	6	1	29.0257	18.3662	10.4707	0	4.81137	5.17084	1.43943	8.61541	0.232184
Lamc2	21.5935	1.39451	0.578559	2.41031	0.0159391	0.215047	ENSMUSG00000026479	0.244407	0.590137	0.203127	0.202406	0.091269	0.125277	0.104546	0.209597	0.075677	32	61	15	22	7	18	13	17	9	24.991	63.7339	21.238	21.2222	9.33352	12.8753	10.2844	22.6184	8.04449
Ccnl1	7451.05	0.555946	0.230567	2.41121	0.0158996	0.215047	ENSMUSG00000027829	144.949	341.316	169.142	160.773	143.959	171.679	150.402	141.21	142.17	7837	14446	5219	7002	4558	10077	7596	4714	6868	6070.14	15096.9	7243.48	6904.31	6029.17	7226.08	6059.83	6240.32	6189.18
Smu1	8024.63	-0.271862	0.112833	-2.40942	0.015978	0.215047	ENSMUSG00000028409	160.122	124.575	150.062	188.04	200.089	169.959	184.091	161.123	157.878	9755	6032	5221	9484	7071	11146	10700	6044	8745	7606.82	6251.25	7290.44	9160.56	9506.84	8115.63	8414.15	8078.21	7797.81
Acox3	391.417	0.714397	0.296314	2.41095	0.0159111	0.215047	ENSMUSG00000029098	6.59692	11.8883	6.91549	3.37046	5.36936	8.99975	4.69435	4.33717	4.75754	602	624	353	186	225	666	342	228	384	399.59	761.295	428.405	209.384	325.367	548.026	273.61	277.312	299.76
Aqp11	88.905	-0.678675	0.281623	-2.40987	0.0159582	0.215047	ENSMUSG00000042797	0.913488	0.861668	0.617898	1.19181	1.43133	1.40129	1.83094	0.925117	1.09346	79	80	35	107	83	165	106	68	103	70.335	70.0738	48.6476	94.0967	110.22	108.445	135.626	75.1746	87.5256
Rnf169	381.801	0.590413	0.245029	2.40957	0.0159713	0.215047	ENSMUSG00000058761	3.74458	2.61703	3.5828	1.93141	1.4946	3.19524	2.04692	1.84589	2.76678	668	382	377	296	169	637	349	221	485	544.003	401.563	532.227	287.721	217.158	466.57	286.087	283.015	417.863
Pofut2	762.892	-0.351506	0.145928	-2.40877	0.0160065	0.215225	ENSMUSG00000020260	14.9111	16.3021	13.5644	20.7043	23.5147	19.1103	18.3425	16.8733	17.483	836	688	386	901	713	1123	961	595	861	625.855	722.692	582.157	891.089	987.088	806.205	740.664	747.427	762.852
Nkg7	32.0542	1.10559	0.459259	2.40733	0.0160696	0.215663	ENSMUSG00000004612	4.27305	2.94176	3.32509	1.17461	2.38409	0.722221	2.40148	1.50875	1.82568	76	44	22	18	26	15	44	17	31	58.9948	42.8972	46.9412	16.6291	32.9192	10.0221	31.8974	21.9835	26.2036
Kif3a	132.737	-0.488803	0.20304	-2.40742	0.0160657	0.215663	ENSMUSG00000018395	2.0082	1.95016	2.32375	3.39299	2.82822	2.65628	3.02144	2.74483	3.02987	134	112	67	183	96	172	195	109	173	98.4286	100.8	116.395	170.511	138.6	131.285	142.301	142.037	154.277
Tbc1d14	901.331	0.344562	0.143244	2.40542	0.016154	0.216589	ENSMUSG00000029192	13.2353	12.0877	12.1709	9.95954	7.6806	9.65444	11.1272	10.3224	10.9085	1390	1003	726	845	477	1123	1095	657	1071	1084.66	1046.28	1019.9	836.943	629.515	795.244	877.293	892.786	929.361
Rmnd5b	185.416	0.632069	0.263095	2.40243	0.0162865	0.216923	ENSMUSG00000001054	6.64211	11.0521	7.49737	5.12314	5.78669	3.58979	6.85414	5.05164	6.63112	264	296	149	130	128	127	263	111	238	186.443	327.668	215.192	147.46	162.452	101.28	185.095	149.651	193.504
Sdhb	5541.86	-0.285171	0.118661	-2.40325	0.0162501	0.216923	ENSMUSG00000009863	252.566	203.813	239.131	279.793	312.744	245.032	283.077	305.527	284.563	6607	4243	3582	5974	4739	7034	7120	4821	6705	5143.95	4384.3	4980.04	5843.28	6370.34	5016.02	5546.59	6567.15	6025.05
Fzr1	2062.5	-0.321627	0.133829	-2.40327	0.016249	0.216923	ENSMUSG00000020235	33.7508	28.9755	31.3381	36.9881	45.8077	31.6734	41.5796	41.4459	40.2214	2344	1655	1255	2131	1822	2529	2780	1826	2540	1856.12	1683.07	1762.27	2085.85	2519.49	1750.78	2199.9	2405.53	2299.54
Pik3c2b	162.285	0.692272	0.288146	2.40251	0.0162831	0.216923	ENSMUSG00000026447	1.57703	1.60289	1.52982	0.983781	0.482214	0.861933	0.983155	1.20831	1.32682	281	241	152	167	43	132	124	161	229	213.43	229.123	211.705	136.525	65.2692	117.248	128.008	172.584	186.677
Kif24	99.3554	1.10473	0.459703	2.40314	0.0162549	0.216923	ENSMUSG00000028438	1.88664	5.22743	1.34561	1.62822	0.762001	2.33009	1.25238	1.12999	0.884189	108	186	63	76	29	220	95	47	68	100.015	292.357	72.9411	88.5094	40.4004	124.155	63.8722	63.2203	48.7286
Azin1	5550.53	0.424147	0.176433	2.40401	0.0162163	0.216923	ENSMUSG00000037458	75.2585	85.3203	66.0904	66.1336	44.9667	75.7908	54.7367	51.0508	49.7127	7417	7298	4185	6328	3030	9093	5436	3694	5124	6480.76	7759.33	5818.89	5839.77	3872.95	6559.21	4534.54	4639.39	4449.96
Rpl27a	13136.9	0.348978	0.145246	2.40267	0.0162758	0.216923	ENSMUSG00000046364	860.665	826.897	934.631	678.736	555.213	811.583	619.921	717.569	771.798	18743	14658	11087	12124	7285	19689	12311	10038	15703	14720.3	14937.3	16344.9	11904	9497.76	13951.9	10200.8	12952.2	13723.1
Nubp1	5638.36	-0.285827	0.119016	-2.40158	0.0163242	0.216935	ENSMUSG00000022503	129.848	121.943	131.135	149.79	189.68	135.773	174.289	144.155	152.113	6597	4693	3680	5886	5068	7386	7667	4193	6658	4879.23	4839.53	5038.89	5771.83	7128.57	5127.91	6300.68	5716.42	5942.2
Fam111a	654.7	0.537231	0.223744	2.4011	0.0163459	0.216935	ENSMUSG00000024691	10.3153	10.259	15.6325	5.44415	8.50027	7.66326	9.81082	7.94027	11.0572	898	716	760	384	430	678	789	426	853	688.818	723.56	1067.4	372.779	567.686	514.614	630.273	559.583	767.59
Tmem106b	555.636	0.501247	0.208793	2.40069	0.0163643	0.216935	ENSMUSG00000029571	7.27488	4.83554	6.34773	4.48421	5.99146	3.06833	4.02032	4.09384	4.71885	1096	576	496	572	323	463	553	409	631	797.078	559.587	711.164	503.802	656.539	337.903	423.776	473.383	537.493
Etnk1	2359.19	0.398774	0.166105	2.40073	0.0163625	0.216935	ENSMUSG00000030275	20.5787	16.4593	23.8287	15.3593	12.346	18.8604	14.1504	15.0227	17.2846	3549	2304	2316	2201	1250	3574	2326	1617	2721	2786.27	2353.78	3299	2132.43	1671.8	2566.67	1843.21	2146.64	2432.91
Gm26740	65.3694	1.18424	0.493114	2.40156	0.0163253	0.216935	ENSMUSG00000097705	2.1091	7.341	1.82615	0.955108	1.02312	1.89815	1.96315	2.40213	1.97601	71	217	32	29	22	77	63	38	66	56.0994	206.236	49.6677	26.0502	27.2171	50.7465	50.236	67.4318	54.6402
2700097O09Rik	930.13	-0.306661	0.127761	-2.40028	0.0163826	0.216973	ENSMUSG00000062198	34.5596	25.0706	32.731	41.0988	36.4528	40.5439	39.5431	36.4764	36.3263	1121	704	617	1079	726	1455	1260	667	1040	881.589	675.475	853.752	1075.04	929.996	1039.53	970.439	982.007	963.341
Commd2	1835.01	-0.375199	0.156443	-2.39831	0.0164709	0.217939	ENSMUSG00000036513	72.7352	52.3874	70.7826	87.2543	94.4084	63.7351	97.4624	84.1333	86.1877	2118	1239	1211	2130	1611	2105	2634	1489	2280	1667.09	1268.2	1658.89	2050.69	2164.1	1468.28	2149.08	2035.11	2053.63
Jarid2	2015.04	0.584005	0.243682	2.39659	0.0165486	0.218646	ENSMUSG00000038518	15.816	35.8407	15.8705	12.8193	14.8673	14.6965	17.9706	15.5129	16.1671	2325	3686	1250	1598	1207	2404	2447	1420	2003	1758.04	4207.81	1803.84	1461.15	1652.79	1641.95	1921.74	1819.83	1868.22
Lockd	23.3423	2.05699	0.858353	2.39644	0.0165554	0.218646	ENSMUSG00000098318	1.43468	3.34601	0.986096	1.19535	0.690196	0.078562	0.419029	0.625752	0.058066	19	95	8	17	8	13	10	5	8	33.1373	81.6273	23.2893	28.3108	15.9436	1.81363	9.31115	15.2534	1.39426
Tmem43	1305.89	-0.356771	0.148994	-2.39454	0.0166411	0.219367	ENSMUSG00000030095	21.8239	15.1515	19.2132	26.7448	26.6375	20.3261	27.8339	21.7596	22.1656	1613	888	785	1615	1147	1638	1978	983	1480	1252.71	918.589	1127.7	1574.19	1529.2	1172.71	1537.07	1318.19	1322.69
Gm43340	61.6002	-0.889532	0.371452	-2.39474	0.0166321	0.219367	ENSMUSG00000105228	1.60475	1.65629	1.37886	1.99725	3.30557	3.98631	4.32975	1.81552	2.09235	51	42	25	52	61	139	132	35	60	39.7506	43.3333	34.9247	50.7302	81.8911	99.2483	103.181	47.4616	53.8806
Mrpl39	1664.35	-0.263691	0.110149	-2.39394	0.0166684	0.219522	ENSMUSG00000022889	38.9912	31.3839	35.653	43.8441	44.1103	39.744	47.5318	43.7297	38.5285	2088	1297	1078	1842	1353	2280	2230	1370	1839	1580.45	1343.59	1477.7	1822.32	1788.16	1619.2	1853.53	1870.67	1623.52
Gpn2	785.122	-0.345097	0.144248	-2.39239	0.0167389	0.220244	ENSMUSG00000028848	29.3727	21.0581	27.6703	33.323	32.9435	36.9159	29.6847	34.6573	32.4297	942	544	505	866	612	1298	913	671	941	733.449	555.382	706.506	853.236	822.714	926.519	713.114	913.33	841.844
Rpl34-ps1	266.757	0.38542	0.161147	2.39173	0.016769	0.220434	ENSMUSG00000068396	90.4107	86.9902	86.0002	57.0909	65.9829	67.0135	72.0872	66.6107	78.9676	410	299	238	198	167	333	333	184	313	317.414	323.107	308.221	205.776	231.117	236.274	243.21	247.293	288.4
Mob2	904.291	-0.308341	0.128989	-2.39044	0.0168282	0.221008	ENSMUSG00000025147	26.733	28.3138	23.2066	32.8246	37.1528	29.6818	33.199	33.3048	30.5706	979	878	485	1035	783	1234	1178	759	1007	777.349	869.589	690.012	978.741	1080.47	867.509	928.739	1022.07	924.133
Lmtk2	1216.61	0.479123	0.20047	2.39	0.0168486	0.221069	ENSMUSG00000038970	8.72112	9.12161	7.61358	6.63949	4.393	8.42387	5.10605	5.59122	6.73922	1916	1619	942	1213	566	2031	1064	763	1346	1500.78	1657.92	1339.7	1171.59	756.063	1457.03	845.335	1015.45	1205.63
Dstn	743.04	0.465723	0.19496	2.38881	0.0169029	0.221167	ENSMUSG00000015932	25.1899	23.4913	23.0957	12.8715	15.4519	23.3211	14.8505	18.7675	19.6271	1197	895	623	504	428	1216	674	546	844	934.775	920.734	876.369	489.787	573.476	869.85	530.178	735.01	757.179
Ciao2b	1312.61	-0.28635	0.119888	-2.38847	0.0169188	0.221167	ENSMUSG00000031879	78.7555	78.7286	72.7719	86.0476	105.75	91.1377	90.2875	101.846	93.5461	1487	1142	778	1293	1137	1873	1650	1143	1583	1143.65	1207.52	1080.57	1281.3	1535.83	1330.23	1261.37	1560.85	1412.22
Chchd4	6990.33	-0.379856	0.159008	-2.38892	0.016898	0.221167	ENSMUSG00000034203	96.4896	78.1508	89.1569	130.327	141.561	94.2924	136.83	99.9893	92.436	8065	5272	4183	8766	6663	8460	10557	5216	7065	6236.01	5334.67	5891.93	8636.94	9150.06	6125.17	8507.64	6820.03	6210.54
Gm12057	41.3512	-1.17568	0.492209	-2.38858	0.0169139	0.221167	ENSMUSG00000084081	1.5281	0.363073	0.566266	2.0986	2.35986	1.12166	2.67965	1.71492	1.36271	52	10	11	59	47	42	88	36	42	40.5461	10.3113	15.3886	57.5136	63.0717	30.0001	68.8759	48.7447	37.709
Clptm1	5493.57	-0.391254	0.163897	-2.3872	0.0169772	0.221362	ENSMUSG00000002981	120.331	90.0964	108.876	160.64	171.237	105.378	159.895	126.884	122.926	6373	3919	3116	6623	5381	6454	8021	4374	6153	5023.8	3972.92	4647.98	6877.12	7149.98	4422.03	6422.31	5590.73	5335.31
Arf5	3600.02	-0.33208	0.139123	-2.38694	0.016989	0.221362	ENSMUSG00000020440	161.606	137.964	154.524	189.313	209.675	146.822	195.866	208.215	204.248	4111	2786	2250	3927	3087	4096	4793	3190	4676	3198.03	2883.62	3126.79	3841.95	4149.79	2920.33	3729.24	4348.54	4201.93
Rsf1	1994.44	0.441868	0.185131	2.38678	0.0169964	0.221362	ENSMUSG00000035623	19.1508	29.6369	18.9098	17.1581	16.0646	20.8593	18.5424	13.2094	15.6832	2643	2930	1469	1881	1205	3019	2242	1113	2051	1992.71	3257.56	2012.07	1830.76	1671.79	2181.72	1856.21	1450.59	1696.51
Pgpep1	311.695	-0.73342	0.307221	-2.38727	0.016974	0.221362	ENSMUSG00000056204	3.38185	2.60149	2.55009	7.0328	6.52767	2.27788	5.36386	4.06276	3.59548	391	195	187	325	258	325	413	254	349	249.969	203.096	192.736	533.038	482.55	169.23	381.426	316.927	276.281
Akt1	6479.34	-0.310422	0.130179	-2.38458	0.0170987	0.222489	ENSMUSG00000001729	120.312	95.955	103.676	130.641	156.87	111.88	155.978	126.264	121.462	7924	4894	3821	7155	6059	7961	9453	5172	7365	6151.28	5181.68	5420.11	6849.1	8021.36	5749.39	7672.19	6813.05	6455.89
Mtg2	1253.17	-0.307884	0.129149	-2.38395	0.017128	0.222665	ENSMUSG00000039069	35.7579	31.1317	35.7838	46.2041	46.5093	34.7201	46.4503	41.7789	41.4251	1411	1033	821	1471	1029	1531	1808	979	1438	1102.31	1013.63	1127.96	1460.53	1433.92	1075.79	1377.59	1359.24	1327.57
Tnfaip2	5.17455	3.95409	1.65958	2.38259	0.0171912	0.223242	ENSMUSG00000021281	0.040446	0.348559	0.144658	0	0	0.0645	0	0	0	4	28	7	0	0	7	0	0	0	3.03151	27.5936	11.0867	0	0	4.85911	0	0	0
Adgrl2	65.4472	0.996896	0.41848	2.38219	0.0172102	0.223242	ENSMUSG00000028184	2.32595	1.7375	0.647053	0.840265	0.512378	0.692044	1.17096	0.986318	0.592626	148	111	29	33	21	80	97	52	54	141.593	111.716	40.277	52.4512	31.195	42.3438	68.5779	63.3671	37.5045
Ybey	391.525	-0.434043	0.18222	-2.38198	0.0172199	0.223242	ENSMUSG00000033126	4.58987	3.01448	4.56868	5.4264	6.83935	5.30668	5.27542	5.59623	4.70862	439	256	275	401	400	505	466	367	426	350.81	243.224	357.379	426.167	523.281	407.644	387.951	452.363	374.91
Ciao3	808.071	-0.332572	0.139736	-2.38001	0.0173123	0.224233	ENSMUSG00000002280	15.5154	13.9233	13.2977	18.1682	20.8581	16.2924	21.9267	15.4231	16.5784	901	683	451	889	759	1105	1141	615	924	731.463	693.162	640.287	878.359	983.705	771.827	994.037	767.591	812.212
Nbr1	1168.05	0.502521	0.211312	2.37809	0.0174024	0.22471	ENSMUSG00000017119	16.425	24.7617	17.5637	10.559	13.3427	17.8767	14.9351	10.5819	17.0635	1454	1783	928	890	723	1789	1324	614	1321	1183.03	1883.73	1293.55	779.848	961.139	1294.17	1034.9	804.381	1277.67
Fkbp4	14349.2	-0.228334	0.0960357	-2.37759	0.0174261	0.22471	ENSMUSG00000030357	306.758	249.729	300.728	324.856	367.422	317.147	360.988	325.029	334.34	17231	11352	9596	15093	12091	19662	19349	11210	16999	13496.5	11604.9	13529.2	14655.9	16167.4	14024.9	15279.7	15092.1	15292.3
Parp4	279.282	0.53434	0.224746	2.37754	0.0174288	0.22471	ENSMUSG00000054509	10.1056	16.0184	9.71119	9.12398	8.27004	8.275	6.68243	8.30581	9.54515	473	479	205	237	160	340	221	190	307	288.592	483.159	283.578	267.181	236.202	237.523	183.594	250.33	283.379
Tmem91	692.962	-0.579394	0.243671	-2.37777	0.0174177	0.22471	ENSMUSG00000061702	10.5738	12.6798	9.70194	15.9835	26.0202	13.1922	21.1085	12.4759	11.7679	619	596	319	783	931	847	1184	453	628	487.339	617.556	457.808	756.002	1199.49	611.204	936.332	607.103	563.822
Gm10390	31.6467	1.07269	0.451028	2.37832	0.0173919	0.22471	ENSMUSG00000097368	0.536611	0.550372	0.574085	0.326485	0.259346	0.389506	0.162646	0.328457	0.130165	58	49	35	29	17	47	17	22	13	45.6948	50.1046	50.028	28.6149	22.719	33.4156	13.3339	29.434	11.4751
Ddx39a	14546.8	-0.264193	0.111201	-2.37583	0.0175097	0.225341	ENSMUSG00000005481	416.872	366.391	398.281	492.484	551.635	415.318	518.788	461.918	431.472	17020	11966	9204	16450	13078	18549	20154	11490	15892	13245.3	12296.2	12940.5	16046	17529.2	13263.6	15858.3	15489.8	14252.5
Marchf8	63.7184	1.5445	0.650079	2.37586	0.0175079	0.225341	ENSMUSG00000025702	0.55827	3.14682	0.331338	0.605981	0.454007	0.816855	0.133363	0.383343	0.442272	58	232	21	47	19	103	15	28	46	45.0287	268.08	27.327	50.1191	36.6235	66.2224	10.3486	32.6316	37.0848
Rassf6	10.928	1.66444	0.700734	2.37529	0.0175353	0.225466	ENSMUSG00000029370	0.377034	0.944339	0.331318	0.152511	0.143733	0.205326	0.087727	0.27368	0.208315	18	30	6	6	4	11	4	8	9	13.1986	34.9159	11.8596	5.47453	5.03221	7.22448	2.95449	10.1111	7.58106
Itm2c	118.452	0.814742	0.343142	2.37436	0.0175795	0.225763	ENSMUSG00000026223	3.84184	4.4122	2.94207	0.880999	1.94527	3.05807	2.21321	2.10894	2.69274	213	189	94	41	64	185	119	73	131	166.576	202.058	130.437	39.1694	84.3541	133.271	92.3202	96.5036	121.375
Nup210	5576.69	0.359936	0.151608	2.37413	0.0175905	0.225763	ENSMUSG00000030091	56.2406	42.0193	48.7903	37.1074	34.0642	37.4702	33.5711	45.8549	42.4454	9197	5364	4634	5399	3131	7046	5512	4817	6291	7329.69	5784.05	6501.97	4959.01	4440.03	4908.36	4209.21	6307.07	5750.8
Rpl36-ps12	509.703	-0.837587	0.353025	-2.3726	0.0176634	0.226493	ENSMUSG00000091845	86.3557	89.0177	56.7468	156.046	60.9305	153.17	73.0622	211.268	177.471	471	368	187	652	186	916	403	685	846	363.367	395.187	243.611	672.739	256.728	647.283	295.889	936.884	775.639
Rad23a	8000.04	-0.401429	0.16935	-2.37042	0.0177681	0.227629	ENSMUSG00000003813	198.382	154.805	202.78	251.951	308.828	175.627	294.625	220.456	234.629	8797	5482	5195	9281	7964	8464	12594	6049	9388	6890.41	5678.68	7201.82	8973.02	10727.5	6131.62	9844.79	8080.68	8471.87
Ppp2cb	2610.73	-0.289778	0.122365	-2.36816	0.017877	0.228644	ENSMUSG00000009630	83.4319	73.6329	84.9577	100.835	114.143	82.1674	110.153	95.0006	96.4373	2941	2074	1706	2917	2339	3178	3720	2037	3070	2293.61	2137.99	2388.17	2842.48	3138.26	2270.4	2913.28	2756.26	2756.09
Ermp1	743.686	0.418839	0.176867	2.3681	0.0178798	0.228644	ENSMUSG00000046324	8.47973	7.69512	7.9432	5.2138	5.44738	7.66451	5.14527	5.55959	7.38729	1091	812	593	646	484	1098	741	528	823	919.506	881.324	880.733	579.729	590.763	835.357	536.761	636.241	832.759
Wfdc21	108.983	0.701033	0.296178	2.36693	0.0179363	0.228951	ENSMUSG00000051748	21.493	27.3875	35.3249	14.6947	15.6621	11.5816	19.4757	19.1093	23.974	142	138	140	75	58	84	129	74	139	109.377	147.207	183.817	76.6811	79.7135	59.2393	95.3503	102.631	126.832
Gm2606	18.3904	-2.52094	1.06506	-2.36696	0.0179351	0.228951	ENSMUSG00000078300	0	0.507262	0.247621	1.69731	0.784483	1.08668	2.93729	0	2.19782	0	9	3	31	10	27	63	0	44	0	9.35123	4.16757	30.4954	13.5023	19.2956	49.0093	0	39.6921
Aste1	549.416	-0.387308	0.163709	-2.36583	0.0179898	0.229427	ENSMUSG00000032567	11.0057	11.1043	10.9076	15.8299	18.5492	14.2418	15.3322	11.4256	12.3011	532	515	323	685	583	794	756	329	572	443.882	473.355	450.128	654.754	748.084	577.307	595.061	485.971	516.199
Nkiras2	1094.79	-0.285528	0.120811	-2.36343	0.0181065	0.230083	ENSMUSG00000017837	25.2221	22.6861	24.5355	28.0646	30.6148	35.3875	30.6256	25.8374	28.13	1248	878	691	1123	889	1934	1420	807	1270	973.712	925.028	968.83	1110.93	1182.05	1373.11	1137.34	1052.7	1129.37
Ablim1	1272.15	0.527216	0.223016	2.36403	0.0180775	0.230083	ENSMUSG00000025085	12.5212	15.9561	17.1879	6.34185	10.1385	13.9729	9.83888	11.0706	12.7737	1736	1544	1299	746	694	1797	1189	989	1606	1279.25	1721.82	1795.61	664.396	1035.95	1434.87	967.072	1193.69	1356.73
Creb1	2362.23	0.269438	0.114002	2.36344	0.0181062	0.230083	ENSMUSG00000025958	17.9951	18.1853	19.7634	15.8631	16.1616	18.1146	15.9388	13.2041	14.712	3546	2307	2236	2306	1351	3595	2772	1532	2482	2506.87	2675.75	2815.23	2266.02	2251.72	2536.42	2136.15	1941.3	2130.64
Sf3b1	15521.9	0.462465	0.195629	2.36398	0.0180796	0.230083	ENSMUSG00000025982	120.651	226.17	130.816	113.885	120.551	138.652	116.857	99.9727	116.728	17942	25108	11243	14209	10029	22683	16826	9182	15772	13937.7	27595.7	15452.4	13490.3	13927.8	16099	12987.2	12188.4	14018.4
Pmp22	12.3371	2.31924	0.981599	2.36272	0.0181414	0.230318	ENSMUSG00000018217	0.810119	0.617893	0.847541	0.35531	0.077253	0	0.282559	0	0.199019	36	22	19	13	2	0	12	0	8	27.6795	22.2982	29.6105	12.4484	2.63984	0	9.28794	0	7.06912
Zcchc17	3017.33	-0.394009	0.166848	-2.36149	0.0182017	0.230877	ENSMUSG00000028772	86.4436	58.3456	83.9905	107.505	106.901	75.5751	125.992	96.216	95.234	3644	1919	1930	3669	2726	3310	4467	2481	3539	2765.55	1971.53	2747.6	3526.76	3420.45	2430.2	3877.86	3248.64	3167.39
Tgfbr1	2541.42	0.344087	0.145769	2.36049	0.0182508	0.23095	ENSMUSG00000007613	27.3674	25.528	22.4394	22.6118	16.7092	17.0564	24.1607	19.0436	20.5629	4107	3021	1911	2743	1347	2700	3380	1767	2779	3145.01	3098.51	2636.8	2664.54	1920.42	1970.11	2671.15	2309.63	2456.61
Slc26a11	153.485	1.17638	0.498386	2.36037	0.0182566	0.23095	ENSMUSG00000039908	1.63678	9.65878	1.98823	2.18634	1.23353	2.71291	2.48955	2.41181	1.08744	114	540	78	126	50	171	154	103	69	86.4799	539.008	107.416	118.452	65.182	144.071	126.545	134.485	59.7299
Tmsb4x	15072.3	0.598392	0.253503	2.36049	0.0182508	0.23095	ENSMUSG00000049775	1349.77	1388.67	1914.71	868.995	704.582	736.371	983.426	1280.92	1609.11	21313	17252	17519	11049	6389	12765	15101	11940	22737	16523.5	17955.2	23967.6	10908.4	8626.38	9060.59	11582.1	16549	20478.2
Lmna	23.1953	1.95523	0.828842	2.35899	0.0183249	0.231399	ENSMUSG00000028063	0.284106	2.36973	0.348548	0.312198	0.184151	0.52076	0.076824	0.451659	0.074771	15	104	10	11	6	23	6	14	6	12.3575	108.867	15.502	13.9244	8.01082	22.7668	3.21476	20.7332	3.38098
Gm28438	8538.93	0.917914	0.38911	2.35901	0.0183239	0.231399	ENSMUSG00000101939	3758.35	3804.05	3313.7	1585.83	1031.74	3091.34	1026.52	2344.13	2492.24	16218	12414	8760	5224	2492	14615	4527	6188	9391	12567.6	13435.3	11329.9	5437.89	3450.23	10390	3302.44	8273.05	8663.93
Washc4	2775	0.313432	0.132887	2.35864	0.0183421	0.231409	ENSMUSG00000034560	28.0442	31.2867	27.9636	23.5239	19.5029	23.6015	29.5035	22.3631	24.0306	3889	3552	2041	2781	1791	3653	3470	1888	2647	2993.19	3526.93	3051.82	2574.53	2081.81	2531.89	3029.45	2519.01	2666.35
Zfp597	614.41	0.53368	0.226426	2.35698	0.0184244	0.232239	ENSMUSG00000039789	8.0616	7.66216	8.45191	4.40218	4.60018	7.99753	4.09118	6.66516	5.89574	1042	655	519	535	285	1029	542	459	640	754.885	757.807	809.265	422.694	430.996	752.715	368.711	658.684	573.931
Trmu	643.197	-0.447069	0.189709	-2.35661	0.0184428	0.232264	ENSMUSG00000022386	22.051	21.2321	26.7695	27.5713	45.2361	25.8711	30.9788	30.1165	33.5323	630	497	416	666	649	789	788	527	830	476.633	484.725	591.657	611.098	977.896	562.062	644.198	687.013	753.494
Edf1	4624.03	-0.355877	0.151045	-2.3561	0.0184679	0.232373	ENSMUSG00000015092	373.602	308.249	330.708	413.079	466.894	342.629	408.232	519.188	462.285	5433	3522	2793	4822	3895	5473	5795	4437	6004	4209.52	3668.36	3810.18	4772.6	5261.32	3880.28	4425.18	6173.83	5414.96
Btg2	1946.17	0.550815	0.233906	2.35485	0.0185299	0.232738	ENSMUSG00000020423	31.7506	65.2339	32.7144	26.3316	32.0611	23.7074	31.5846	31.6133	35.0968	2242	3705	1307	1538	1323	1837	2124	1375	2247	1753.06	3804.23	1846.97	1490.81	1770.42	1315.66	1677.73	1842.14	2014.54
Cntrl	1504.25	0.350637	0.148883	2.35512	0.0185169	0.232738	ENSMUSG00000057110	17.0076	19.8211	18.5606	11.9016	13.5614	18.058	16.8993	13.2942	14.4104	2363	1637	1262	1184	1043	2369	1573	961	1618	1575.91	1939.83	1758.56	1130.81	1256.74	1681.8	1506.46	1300.04	1388.12
Rn18s	52350.7	1.10197	0.468056	2.35434	0.0185554	0.232851	ENSMUSG00000119584	2209.46	2303.77	2129.79	729.288	446.832	1897	559.148	1331.73	1260.32	101189	84562	55391	27510	11925	95330	24466	37315	52222	79010.2	87012.6	77877.2	26742.1	15980.6	68183.6	19236.1	50260.2	46853.5
Rbm22	3979.19	-0.32853	0.139601	-2.35334	0.0186054	0.232993	ENSMUSG00000024604	85.9679	72.1773	82.4485	100.749	119.823	85.9381	126.578	90.1763	89.1686	4607	3067	2503	4406	3718	4835	6194	2939	4418	3556.46	3153.76	3487.71	4273.85	4957.65	3573.4	5037.8	3937.13	3834.91
Arhgap39	480.621	-0.422521	0.179592	-2.35268	0.0186389	0.232993	ENSMUSG00000033697	11.4605	14.2019	9.16729	14.6604	19.4572	15.6025	17.3058	13.6787	14.1698	677	448	302	399	470	674	553	357	505	376.054	492.199	307.584	493.276	638.528	514.583	546.311	473.693	483.361
Lif	16.3228	2.66383	1.13236	2.35247	0.0186494	0.232993	ENSMUSG00000034394	0	1.16766	0.409369	0.120741	0.256554	0.027366	0.073708	0.016193	0.033084	0	94	7	10	15	3	7	1	3	0	83.0255	28.18	8.33494	17.2735	1.85173	4.77377	1.15047	2.31541
Ncapd3	306.332	0.575038	0.24432	2.35363	0.0185912	0.232993	ENSMUSG00000035024	4.29541	5.30532	4.40848	3.56476	2.38142	2.2788	2.83801	4.28542	3.65087	414	416	223	304	156	273	315	292	356	350.545	457.298	367.879	298.311	194.37	186.922	222.821	369.096	309.741
Dnd1	48.0379	-0.831004	0.353241	-2.35251	0.0186472	0.232993	ENSMUSG00000044595	0.717132	0.728607	1.24441	1.32959	1.74346	1.95697	1.80444	1.147	1.49158	35	27	28	53	47	90	81	31	57	25.0527	26.5443	45.4224	47.6402	60.9055	68.9703	61.2731	42.1559	54.3765
Dnmt1	1087.63	0.465051	0.197841	2.35063	0.0187418	0.2336	ENSMUSG00000004099	12.4596	13.6868	12.8948	10.1796	10.5263	6.06514	8.76684	9.78829	11.8405	1541	1291	959	1103	815	891	994	807	1348	1241.53	1440.45	1313.84	1040.11	1049.01	607.445	840.417	1029.35	1226.54
Tecr	2370.84	-0.27597	0.117408	-2.35051	0.0187476	0.2336	ENSMUSG00000031708	124.333	100.114	131.794	130.199	159.46	138.26	152.919	148.061	142.35	2724	1807	1597	2325	2096	3180	3244	1988	2831	2125.51	1807.67	2303.82	2282.37	2726.35	2375.68	2515.01	2671.31	2529.85
Zdhhc1	45.7875	0.934838	0.397698	2.35063	0.0187419	0.2336	ENSMUSG00000039199	1.44585	2.94678	1.33299	1.0711	0.87396	1.20153	1.40181	0.674536	0.93251	71	117	28	34	21	50	50	24	40	49.114	105.725	46.3007	37.3087	29.6912	41.0235	45.8115	24.1822	32.9306
Snip1	1154.39	-0.358695	0.152663	-2.34959	0.0187942	0.233845	ENSMUSG00000050213	23.5219	15.0882	23.9278	27.3979	30.0018	25.6825	26.1609	26.1472	26.1909	1392	722	770	1323	1033	1655	1449	929	1366	1072.65	726.725	1115.74	1281.15	1368.31	1177.16	1147.72	1258.39	1241.64
H2ac18	101.684	0.993476	0.422852	2.34946	0.0188004	0.233845	ENSMUSG00000064220	8.20051	32.1098	12.6309	6.53715	8.51813	10.77	6.39302	9.04375	12.9869	88	268	80	56	52	127	68	56	124	67.9077	281.386	107.546	55.9631	70.6559	89.7762	51.3264	78.4973	112.098
Pomgnt1	2248.27	-0.453278	0.193002	-2.34856	0.018846	0.234006	ENSMUSG00000028700	48.3613	29.8199	36.866	54.5196	73.2669	42.082	58.0084	47.8278	42.6449	2684	1406	1307	2661	2518	2540	3266	1754	2394	2225.79	1449.52	1734.96	2572.96	3372.46	1946.73	2568.49	2323.13	2040.4
Spata33	23.9796	-1.28228	0.545988	-2.34855	0.0188466	0.234006	ENSMUSG00000048478	0.328345	0.428929	0.442494	0.991277	0.821967	1.2571	1.27633	0.29837	1.34423	19	31	11	14	20	37	33	14	22	9.73896	13.4374	13.4204	30.1492	24.3831	37.4772	36.4206	9.33992	41.4494
Chmp1a	3726.51	-0.346563	0.147644	-2.34729	0.0189104	0.234018	ENSMUSG00000000743	81.212	66.3688	80.3612	98.9606	116.787	73.4329	98.8453	100.748	96.5962	4179	2746	2399	4239	3506	4139	4960	3216	4544	3291.88	2841.42	3330.79	4113.28	4734.45	2991.78	3854.61	4309.92	4070.49
Puf60	8730.68	-0.262768	0.111912	-2.348	0.0188746	0.234018	ENSMUSG00000002524	249.303	208.51	229.115	276.294	317.035	236.882	287.337	272.23	276.032	10605	6840	5593	9493	7734	10695	11779	7027	10552	8186.12	7231.42	7692.72	9302.93	10411.4	7818.01	9077	9433.91	9422.62
Mef2c	2643.02	0.45772	0.195005	2.34722	0.0189139	0.234018	ENSMUSG00000005583	52.4694	47.9843	65.9623	28.8433	37.652	39.4742	39.8775	42.1546	56.3841	3801	2792	2824	1867	1447	3276	2608	1885	3727	2978.92	2877.4	3829.34	1679.18	2137.93	2252.58	2178.12	2525.83	3327.91
H2ac24	99.2929	1.0373	0.441905	2.34734	0.0189082	0.234018	ENSMUSG00000094777	25.9353	26.2795	20.0605	5.52105	13.4397	5.23219	8.58793	21.5918	16.6142	205	159	94	34	60	45	68	99	116	157.891	168.531	124.454	34.4565	82.0947	31.7357	50.6329	138.435	105.406
Pcnx	703.107	0.402763	0.171807	2.34428	0.0190639	0.234516	ENSMUSG00000021140	12.8799	9.56221	12.1307	7.16054	8.21671	11.0953	10.5373	8.39862	7.47775	1080	623	532	732	410	1179	832	451	751	917.103	718.672	883.154	522.91	585.86	793.925	721.899	630.92	553.523
Mtrf1	197.918	-0.57463	0.245067	-2.34479	0.0190378	0.234516	ENSMUSG00000022022	4.25117	3.11952	5.26927	6.39963	6.49335	8.51635	4.87717	6.37104	5.15285	189	111	134	234	168	415	207	173	207	147.545	114.354	187	227.755	225.391	297.087	162.849	233.363	185.92
	7420.7	-0.295564	0.126103	-2.34383	0.0190871	0.234516	ENSMUSG00000022956	487.325	411.144	476.995	572.154	611.396	460.578	564.2	615.176	584.085	8620	5743	4855	8179	6207	8913	9679	6457	9265	6683.91	5956.15	6689.4	8046.17	8386.26	6348.85	7444.11	8904.07	8327.4
Iscu	2609.85	-0.362347	0.154532	-2.3448	0.0190372	0.234516	ENSMUSG00000025825	136.938	123.897	124.332	164.62	204.365	124.155	159.92	178.371	169.305	2983	2107	1526	2855	2521	2924	3290	2274	3250	2279.58	2178.36	2116.37	2810.04	3402.39	2077.33	2560.97	3133.7	2929.94
Atg7	1016.95	-0.445268	0.189938	-2.34428	0.0190636	0.234516	ENSMUSG00000030314	15.9539	14.7151	13.3551	21.1997	25.1808	12.9769	20.0872	21.2578	20.5802	1148	786	649	1093	966	980	1377	938	1194	867.756	845.358	742.769	1182.39	1369.79	709.445	1051.12	1220.27	1163.7
Atp6ap2	3776.06	0.355458	0.151617	2.34444	0.0190556	0.234516	ENSMUSG00000031007	85.1338	112.866	83.372	81.0868	68.2902	78.6596	88.8481	68.9644	61.4473	5017	5208	2786	3950	2323	5061	4987	2478	3268	3897.96	5458.23	3903.29	3807.01	3127.13	3619.94	3913.67	3332.47	2924.82
Birc3	3613.09	0.327108	0.13955	2.34401	0.0190774	0.234516	ENSMUSG00000032000	94.1372	79.472	102.594	69.4564	80.2088	60.3383	73.0721	78.9355	82.2746	5016	3554	3316	3393	2517	3777	4022	2924	4207	4169.47	3717.82	4646.13	3154.35	3553.17	2685.83	3113.51	3689.78	3787.74
Gm5165	283.966	-0.523081	0.223093	-2.34468	0.0190433	0.234516	ENSMUSG00000116802	5.18292	4.34111	5.4478	8.16103	9.39337	7.40198	8.00086	4.39574	6.22109	287	193	171	373	300	446	423	146	312	223.148	197.409	239.836	360.298	404.49	320.552	331.699	199.81	278.45
Bag1	6997.1	-0.309755	0.1322	-2.34308	0.0191252	0.234779	ENSMUSG00000028416	265.009	220.872	252.7	330.053	345.803	238.198	324.834	306.149	304.754	8124	5405	4426	8286	6161	8038	9554	5697	8454	6338.7	5579.92	6180.46	8095.09	8272.2	5726.54	7474.83	7728.21	7577.94
Diaph3	40.7517	1.16137	0.495821	2.34233	0.0191638	0.235049	ENSMUSG00000022021	0.895952	0.998768	0.821505	0.325413	0.262079	0.956129	0.346108	0.252235	0.289627	109	98	20	18	6	125	40	19	32	62.3971	73.467	59.7815	23.2388	18.2544	66.9285	23.1895	18.5392	20.9691
Ncaph	139.207	0.749325	0.320368	2.33895	0.0193381	0.23698	ENSMUSG00000034906	4.02205	3.97227	2.39777	1.59793	1.63034	3.64063	1.99595	1.51412	2.13341	275	216	94	91	66	271	131	64	134	215.957	225.271	131.644	87.9783	87.5491	196.477	103.103	85.7998	119.085
Pcnx4	466.074	-0.367339	0.157152	-2.33747	0.0194149	0.237446	ENSMUSG00000034501	4.93715	3.48645	4.42111	6.22629	6.19632	5.3876	5.9541	5.06776	4.68257	562	320	284	588	413	673	644	357	484	439.869	328.079	402.767	568.82	552.12	482.455	510.344	476.507	433.704
Gramd1b	30.7441	1.11185	0.47571	2.33724	0.0194267	0.237446	ENSMUSG00000040111	0.736984	0.839632	0.958702	0.379957	0.340425	0.36477	0.286075	0.208429	0.806747	39	68	29	22	15	48	20	9	33	40.5032	48.738	53.8753	21.4123	18.7113	20.1495	15.1255	12.0891	46.0924
Zfp786	27.3409	-1.19618	0.511737	-2.33748	0.019414	0.237446	ENSMUSG00000051499	0.242941	0.29912	0.191736	0.357792	1.09575	0.63186	0.371407	0.543	0.477821	15	20	9	23	40	54	25	25	32	13.9676	18.1641	11.272	21.0936	63.0063	36.5138	20.5433	32.9479	28.5594
Kif13b	341.278	0.545486	0.233481	2.33632	0.0194744	0.237824	ENSMUSG00000060012	3.91482	3.04966	2.15919	1.34327	2.30488	2.2376	2.69991	2.06839	2.02247	490	427	256	223	242	438	412	254	338	542.658	446.492	306.043	190.932	319.533	311.754	360.052	302.589	291.446
Pola1	408.742	0.482989	0.206814	2.33538	0.0195238	0.237892	ENSMUSG00000006678	5.32806	3.9365	4.45578	2.28641	3.12158	3.61966	2.94231	3.77378	4.03828	725	438	332	263	253	553	394	329	493	573.807	447.77	490.678	252.493	336.22	391.814	304.849	428.923	452.122
Arid3a	227.852	0.770611	0.330016	2.33507	0.0195397	0.237892	ENSMUSG00000019564	2.39356	3.17948	2.64897	1.01956	0.905274	2.92921	1.53106	1.48877	1.8719	339	366	214	121	76	457	208	132	243	267.552	375.376	302.772	116.863	101.204	329.1	164.647	175.63	217.524
Sptbn1	1792.21	0.420252	0.18001	2.3346	0.0195643	0.237892	ENSMUSG00000020315	15.8127	15.48	18.9967	10.9626	10.422	10.7242	12.8442	14.2684	16.5601	2748	1873	1740	1393	924	2097	1813	1474	2406	1982.38	2049.74	2435.2	1409.26	1306.73	1351.33	1549.13	1887.83	2158.28
Gpatch3	392.639	-0.353797	0.151528	-2.33487	0.0195503	0.237892	ENSMUSG00000028850	9.88721	8.52556	7.73959	10.5433	12.4814	11.3553	10.1611	11.4731	11.7747	472	331	220	411	294	614	486	305	534	365.324	332.717	292.414	399.465	461.234	421.715	361.199	447.396	452.29
Cd9	2535.06	0.393089	0.168319	2.33538	0.0195236	0.237892	ENSMUSG00000030342	141.413	147.121	107.681	123.791	85.1083	91.1277	123.062	102.159	86.5863	4036	3341	1752	2889	1408	2851	3374	1764	2228	3142.14	3452.62	2447.05	2820.84	1891.19	2035.1	2630.78	2396.17	1999.63
Jup	42.9502	1.50831	0.64629	2.33379	0.0196065	0.237995	ENSMUSG00000001552	0.710981	3.15052	0.275669	0.597928	0.307389	0.894143	0.352699	0.429987	0.396323	40	151	13	30	15	68	28	11	30	37.4183	175.128	14.8351	32.2681	16.1796	47.2985	17.8579	23.883	21.6839
4931428F04Rik	67.2321	1.13215	0.485109	2.33381	0.0196056	0.237995	ENSMUSG00000014837	0.859138	3.79002	1.45003	0.917724	1.021	0.810553	0.490383	1.44155	0.991509	68	151	53	40	36	52	40	68	50	42.9676	199.98	73.5319	46.6038	50.856	40.6689	23.3662	75.6015	51.5132
Dcbld1	333.105	-0.415816	0.178318	-2.33188	0.0197068	0.239006	ENSMUSG00000019891	5.12089	3.98202	3.54284	6.34813	5.55948	5.15655	6.79034	4.60976	5.77587	408	262	162	429	274	452	514	225	409	322.495	264.868	228.143	409.942	350.159	326.402	411.406	306.382	378.145
Sar1b	3483.51	-0.290048	0.124466	-2.33033	0.0197885	0.239494	ENSMUSG00000020386	147.24	119.838	143.455	184.936	188.128	148.133	183.62	165.328	144.955	4088	2634	2281	4203	3033	4520	4908	2778	3633	3185.78	2738.62	3173.81	4103.07	4070.95	3221.48	3822.16	3775.21	3260.51
Epb41	920.901	0.35198	0.151041	2.33036	0.0197872	0.239494	ENSMUSG00000028906	12.3673	11.5695	10.3215	8.90949	8.52969	7.81752	9.43482	8.28588	11.3189	1489	1149	653	848	556	1037	995	685	1138	1135.7	1122.15	969.191	838.961	783.387	721.564	833.537	803.036	1080.58
Mcl1	8458.87	0.344264	0.147763	2.32983	0.0198149	0.239494	ENSMUSG00000038612	125.06	140.918	145.78	110.12	89.0359	137.354	105.513	98.1546	116.457	11174	10141	7359	8152	4654	13462	8967	5416	9442	8741.51	10403.5	10419.4	7892.79	6224.23	9649.9	7095.36	7240.76	8462.39
Gm37078	5.51685	3.0027	1.28867	2.33007	0.0198022	0.239494	ENSMUSG00000102652	0.139334	0.49626	0.350837	0	0	0.14512	0.062551	0.032479	0	7	20	10	0	0	8	3	1	0	5.47953	20.6132	14.1081	0	0	5.73626	2.36659	1.34802	0
Zc3h7b	429.648	0.443408	0.190394	2.32889	0.0198648	0.239847	ENSMUSG00000022390	4.23872	4.21303	5.20703	3.23422	3.02359	2.82908	3.03874	3.84786	4.26213	619	482	412	385	253	448	414	335	549	473.547	497.131	594.833	370.507	337.835	317.679	326.605	453.684	495.013
Vps16	3228.12	-0.274811	0.118013	-2.32864	0.0198781	0.239847	ENSMUSG00000027411	127.705	130.707	135.758	157.216	187.033	149.032	183.707	153.617	136.581	3527	2731	1861	3637	3042	4253	4493	2733	3449	2681.9	2899.05	2915.08	3385.36	3928.09	3145.62	3711.58	3404.66	2981.71
Slc7a7	107.054	0.716555	0.307863	2.32751	0.019938	0.240091	ENSMUSG00000000958	4.58876	2.81	3.19854	1.58459	1.91987	1.47231	2.8737	2.12219	3.01503	246	121	92	61	60	87	149	57	147	183.762	118.861	131.632	65.7101	76.6149	59.5887	111.188	90.0093	126.117
Tmem18	98.1201	0.644261	0.276821	2.32735	0.0199464	0.240091	ENSMUSG00000043061	2.20225	1.91683	2.64597	1.6383	1.08931	1.34019	1.13328	1.81278	1.69392	164	84	111	91	49	104	83	86	114	122.983	113.061	151.092	93.815	60.8393	75.2248	60.8858	106.839	98.3409
Ltn1	2049.85	0.319404	0.137249	2.32719	0.0199549	0.240091	ENSMUSG00000052299	14.7355	10.9918	16.6696	12.5553	11.5561	11.0575	11.3948	10.352	11.6152	3081	1854	1966	2186	1419	2541	2226	1342	2191	2407.91	1897.1	2785.32	2103.78	1888.6	1816.13	1791.35	1785.28	1973.16
Gm37940	120.912	0.776544	0.333713	2.32698	0.0199665	0.240091	ENSMUSG00000103899	2.75045	1.97915	2.69449	1.49649	1.19076	2.72156	1.14149	1.10925	1.05389	233	135	129	105	59	253	92	58	81	182.265	138.525	182.58	101.689	78.9186	181.273	72.7735	77.5777	72.6037
Lcmt2	1236.45	-0.380226	0.163476	-2.32589	0.0200246	0.240585	ENSMUSG00000074890	22.4504	13.8975	22.9535	24.3192	30.5815	26.414	27.4648	22.8571	24.1802	1531	705	853	1323	1150	1939	1635	926	1415	1144.26	747.78	1196.63	1270.71	1559.04	1352.75	1346.37	1229.2	1281.35
Ndufa7	3186.12	-0.290847	0.125133	-2.32431	0.0201089	0.241392	ENSMUSG00000041881	419.069	346.715	418.864	461.632	553.56	424.028	472.554	523.999	490.352	3754	2352	2204	3174	2786	4141	4168	2715	3891	2871.98	2509.67	2935.25	3244.06	3794.14	2920.82	3115.64	3789.94	3493.54
Cog1	1085.53	-0.342309	0.147335	-2.32334	0.020161	0.241607	ENSMUSG00000018661	19.2263	15.1278	19.6121	21.9358	27.975	24.7917	21.3286	19.0355	23.1767	1340	747	651	1151	1075	1585	1341	848	1292	961.217	798.793	1003.51	1124.68	1399.29	1246.26	1026.47	1004.39	1205.13
Lrp11	448.489	0.354148	0.15242	2.3235	0.020152	0.241607	ENSMUSG00000019796	8.66315	6.26969	8.27154	6.18445	6.49687	5.4492	6.14126	5.61644	6.74126	746	435	363	440	320	508	501	305	515	574.155	438.881	560.552	420.294	430.636	362.995	391.572	392.845	464.469
Bloc1s5	532.888	-0.361067	0.15548	-2.32228	0.020218	0.241879	ENSMUSG00000038982	5.87931	4.05779	4.27905	6.3924	6.00173	5.67403	5.97538	6.06879	6.76558	692	375	336	654	424	635	688	426	689	542.378	395.378	403.645	604.698	553.739	526.117	530.326	590.859	648.849
Arhgef33	15.3401	-1.78487	0.768546	-2.3224	0.0202114	0.241879	ENSMUSG00000054901	0.139885	0.34118	1.19728	2.83485	2.36705	0.715106	1.44311	1.21152	2.44468	2	4	9	29	13	12	21	11	33	1.49467	3.85041	13.0812	31.0601	25.295	7.62796	14.8345	13.6618	27.1555
Erbin	3756.53	0.37788	0.162859	2.32029	0.020325	0.242673	ENSMUSG00000021709	33.6928	34.3575	31.5326	25.68	19.0031	33.2817	26.3447	22.9902	27.7875	5599	4605	2968	3564	1851	6045	4151	2379	4206	4389.47	4727.64	4200.59	3430.59	2476.01	4358.09	3301.93	3161	3763.45
Nagpa	715.129	-0.355133	0.153069	-2.32008	0.0203367	0.242673	ENSMUSG00000023143	20.6821	14.8027	14.6437	19.3218	23.5369	20.3958	22.7343	19.4359	24.2655	931	561	448	749	539	1002	898	534	962	728.377	550.618	527.339	697.764	829.02	721.969	770.274	722.392	888.412
Ganc	194.328	0.599251	0.258279	2.32017	0.0203316	0.242673	ENSMUSG00000062646	3.63888	3.56822	4.43061	2.75258	1.53303	3.03087	2.45327	3.43243	2.25456	279	183	196	168	85	296	149	199	211	230.312	238.36	285.818	178.419	96.8623	192.718	149.103	229.138	148.221
Clasp1	1785.19	0.353799	0.152515	2.31977	0.0203532	0.242673	ENSMUSG00000064302	19.7532	23.7923	20.5712	12.9933	18.9569	19.4905	19.2778	16.3345	14.9179	2732	2261	1436	1422	1213	2486	2033	1206	1735	1876.98	2387.85	1998.75	1266.03	1801.54	1861.49	1762.31	1638.08	1473.64
Kctd5	3039.41	-0.315486	0.136021	-2.31939	0.0203741	0.242716	ENSMUSG00000016946	57.8516	50.2215	51.4464	70.9445	83.2968	61.7245	72.4156	57.5988	56.3218	3558	2474	1795	3606	2965	4146	4214	2174	3137	2773.4	2542.93	2521.9	3487.5	3993.73	2974.19	3339.87	2914.18	2806.96
Med11	2220.22	-0.301512	0.130049	-2.31846	0.0204245	0.242777	ENSMUSG00000018923	134.2	120.983	118.16	134.139	171.998	136.352	154.376	171.866	161.525	2603	1857	1320	2115	1925	2899	2884	1976	2814	2020.42	1923.79	1819.01	2070.82	2589.8	2063.31	2235.99	2730.78	2528.08
Stk17b	2278.8	0.459996	0.198403	2.31849	0.0204226	0.242777	ENSMUSG00000026094	35.3617	43.4774	48.5889	25.7541	24.3805	44.7733	29.4465	28.9829	34.2143	2937	2825	2263	1752	1132	3948	2275	1501	2529	2257.58	2931.71	3171.93	1685.99	1556.71	2873.06	1808.6	1952.8	2270.8
Trnau1ap	3018.98	-0.334222	0.144219	-2.31747	0.0204783	0.242777	ENSMUSG00000028898	154.362	130.875	150.388	197.019	209.501	140.214	179.281	185.045	197.79	3456	2356	1970	3519	2624	3377	4026	2423	3820	2667.62	2388.84	2657.5	3491.33	3620.95	2435.5	2980.7	3374.95	3553.45
Fnip1	1259.35	0.439103	0.189508	2.31707	0.0204997	0.242777	ENSMUSG00000035992	10.1063	14.8033	9.15592	10.6572	8.47874	8.80189	8.99507	7.06322	7.14184	1689	1993	864	1485	808	1593	1435	733	1086	1318.27	2039.48	1221.21	1425.45	1106.11	1153.99	1128.8	972.348	968.466
Ndufa13	2503.95	-0.356418	0.153805	-2.31734	0.0204852	0.242777	ENSMUSG00000036199	97.2285	93.5191	80.2742	104.336	124.265	100.112	105.231	139.172	127.549	2839	2176	1339	2492	2105	3207	2951	2459	3358	2211.64	2246.82	1867.12	2433.67	2827.36	2288.71	2302.85	3341.07	3016.3
Atxn7l2	629.309	-0.372386	0.160677	-2.3176	0.020471	0.242777	ENSMUSG00000048997	13.1436	8.82675	9.62234	12.4892	16.9344	13.9071	13.9547	12.3088	13.2153	821	449	331	648	627	930	817	477	758	640.748	454.485	479.654	624.317	825.648	681.432	654.474	633.275	669.747
Igkv3-2	127.247	0.716804	0.309268	2.31774	0.0204633	0.242777	ENSMUSG00000095351	38.1185	45.1577	43.2353	17.7833	27.4844	14.7121	29.4798	28.4377	37.8227	196	176	135	70	79	83	154	88	170	151.344	189.369	175.527	72.4002	109.136	58.7108	112.856	119.768	156.115
Clpb	1165.6	-0.320457	0.138418	-2.31514	0.0206052	0.243716	ENSMUSG00000001829	15.8942	11.4674	14.4367	14.6636	19.7917	17.7947	17.4787	17.4042	18.2683	1488	898	738	1184	986	1826	1452	899	1321	1114.11	848.982	1034.74	1053.97	1387.47	1253.7	1178.69	1287.5	1331.22
Vps29	5441.65	-0.336339	0.145287	-2.31499	0.0206135	0.243716	ENSMUSG00000029462	267.632	214.655	249.274	337.61	353.64	232.378	342.402	314.175	286.596	6478	4242	3443	6397	4825	6106	7798	4417	6065	4961.64	4203.72	4725.65	6418.21	6557.4	4330.25	6107.22	6147.15	5523.63
Slc38a9	706.822	0.818388	0.353565	2.31467	0.0206308	0.243717	ENSMUSG00000047789	7.85936	30.4076	8.31739	7.86013	9.01902	11.5315	9.99496	8.72583	7.14243	600	1365	419	563	409	976	721	411	657	483.533	1975.92	523.239	495.869	554.874	713.084	591.59	566.568	456.723
2700046G09Rik	5.8846	2.4449	1.05667	2.31378	0.0206798	0.24409	ENSMUSG00000097787	0.149287	0.404144	0.656255	0.03026	0.042746	0.22676	0.026009	0.081556	0.027524	6	13	15	1	1	10	1	2	1	4.68227	13.3881	21.0467	0.973188	1.34085	7.14852	0.784792	2.69958	0.897457
Slc39a3	635.836	-0.392963	0.169876	-2.31323	0.0207098	0.244241	ENSMUSG00000046822	7.77218	5.91699	7.36076	7.93633	11.8934	7.86533	8.9686	9.23038	9.95247	745	472	387	611	667	758	800	509	855	568.731	457.312	550.761	595.501	870.409	578.49	631.377	712.836	757.106
Aurkb	59.8083	0.890297	0.384995	2.31249	0.0207505	0.244516	ENSMUSG00000020897	2.51504	3.12734	1.88522	0.756146	1.58816	0.985277	1.10908	1.84362	1.95213	116	109	52	20	45	42	49	53	65	83.8672	110.146	64.2813	25.8554	52.9655	33.0233	35.5803	64.8819	67.6735
Ythdc2	723.262	0.501533	0.217023	2.31097	0.0208346	0.24518	ENSMUSG00000034653	9.65546	13.3774	10.3695	10.3414	7.75376	7.43087	10.543	5.24828	6.81386	1037	1075	565	702	498	790	847	441	612	757.414	1108.35	831.748	831.833	608.31	585.888	795.656	434.494	555.668
Gm38142	157.622	-0.842649	0.36465	-2.31084	0.0208416	0.24518	ENSMUSG00000102383	1.64248	1.33258	1.15932	2.64253	4.05468	2.78805	3.23984	1.12946	1.30118	153	100	61	204	221	285	287	65	110	119.708	102.58	86.3979	197.489	295.552	204.239	227.168	86.8762	98.5875
Slc35a3	1849.68	0.324667	0.140598	2.30918	0.0209336	0.245574	ENSMUSG00000027957	19.9904	15.3279	18.9043	15.8826	12.8034	15.4222	17.2988	11.6701	14.4632	2946	1821	1521	1963	1129	2459	2438	1059	1990	2309.5	1870.39	2233.23	1881.23	1479.37	1790.67	1922.71	1422.91	1737.09
Sfswap	1702.74	0.260128	0.112671	2.30873	0.0209585	0.245574	ENSMUSG00000029439	43.4818	45.4757	44.8772	36.9455	35.9127	36.6706	46.0112	33.4276	37.6473	2151	2025	1250	1637	1092	2605	2089	1160	1857	1816.92	2007.04	1917.48	1583.03	1500.83	1540.15	1849.66	1474.15	1635.4
Gde1	1173.16	-0.338083	0.146369	-2.3098	0.0208992	0.245574	ENSMUSG00000033917	35.1052	27.6598	39.6189	43.0331	45.4242	37.5958	43.1674	49.0584	42.6449	1305	843	801	1314	936	1491	1483	1098	1437	1002.46	833.636	1157.28	1259.93	1297.34	1078.53	1185.49	1478.34	1265.41
Pitpnc1	71.0746	0.997931	0.432135	2.3093	0.0209267	0.245574	ENSMUSG00000040430	0.528945	1.27144	0.886482	0.219252	0.622099	0.550305	0.699881	0.231186	0.453109	90	171	85	31	28	92	99	21	62	60.7804	154.311	104.16	25.8343	71.4935	63.5582	77.3709	28.0363	54.1275
Mrps12	1454.47	-0.353898	0.153291	-2.30867	0.0209621	0.245574	ENSMUSG00000045948	172.834	125.016	174.142	198.84	212.49	158.544	225.822	198.373	222.964	1716	1049	914	1542	1213	1738	2054	1204	1945	1317.58	1006.61	1357.46	1554.36	1620.1	1214.83	1656.22	1596.03	1767.04
Stk26	384.735	0.572152	0.247913	2.30788	0.0210061	0.245884	ENSMUSG00000031112	6.83553	4.83055	9.56408	4.45096	4.52588	3.49527	6.163	3.91557	6.23941	587	328	463	316	241	324	515	227	480	465.292	347.294	665.69	310.674	308.112	239.138	403.595	281.29	441.528
Zfp953	176.524	0.553297	0.239878	2.30658	0.0210784	0.246526	ENSMUSG00000098905	2.155	1.87521	2.73826	1.35709	1.19506	2.23605	1.60684	1.42911	1.44392	268	188	192	140	87	305	190	110	163	209.788	192.706	272.427	135.396	116.29	218.674	150.635	146.748	146.051
Bsg	8320.24	-0.245407	0.106465	-2.30504	0.0211642	0.247324	ENSMUSG00000023175	344.68	298.762	305.445	393.982	402.134	325.896	420.107	378.483	354.939	10091	6989	5093	9456	6863	10513	11771	6715	9396	7871.66	7206.49	7132.79	9226.26	9184.9	7480.74	9230.19	9122.26	8426.86
Cbs	22.0399	-1.5345	0.666187	-2.30341	0.0212559	0.247576	ENSMUSG00000024039	0.253638	0.074593	0.285346	1.09954	0.2269	0.776306	0.437734	0.631588	0.342441	19	3	5	30	10	65	46	23	23	11.9716	3.71859	13.7716	53.2167	10.7109	36.8287	19.8769	31.4614	16.803
Pi4k2a	1419.2	-0.328798	0.142703	-2.30408	0.0212183	0.247576	ENSMUSG00000025178	16.7159	15.455	17.3163	20.0524	25.7884	17.5436	24.4494	19.989	18.1928	1540	1135	941	1487	1367	1738	2093	1150	1509	1197.71	1169.61	1268.69	1473.29	1848	1263.45	1685.36	1511.54	1355.14
Fosl2	234.331	1.04841	0.45513	2.30354	0.0212487	0.247576	ENSMUSG00000029135	2.14443	4.9154	1.12984	1.79532	1.20254	0.495841	2.2102	1.59818	0.831303	348	586	112	227	112	90	351	151	129	270.639	655.217	145.805	232.338	151.786	62.8979	268.356	212.868	109.069
Rnf8	1430.95	-0.358924	0.155805	-2.30367	0.0212414	0.247576	ENSMUSG00000090083	35.8444	30.8672	35.9369	43.4706	57.355	37.3774	51.1746	35.8828	41.6941	1556	1145	879	1605	1309	1826	1980	1031	1800	1230.35	1119.07	1262.02	1530.06	1969.07	1289.99	1689.88	1299.65	1488.44
Timm23	15252.3	-0.292314	0.126953	-2.30254	0.0213047	0.247832	ENSMUSG00000013701	642.307	613.186	616.576	868.564	892.545	631.608	804.832	744.898	697.721	17123	12957	9394	18880	13721	18420	20586	12035	16712	13309.8	13420.8	13064.8	18455.6	18498.2	13155	16045.1	16290.4	15030.9
Il11ra1	75.2177	-0.719695	0.312586	-2.30239	0.021313	0.247832	ENSMUSG00000073889	2.28295	4.33095	4.08268	5.01006	5.27079	6.69019	5.38423	5.51637	7.2307	66	57	53	60	53	149	103	53	99	33.1173	66.2939	60.559	74.5246	76.4692	97.2806	75.2176	84.4535	109.044
Cndp2	2383.25	-0.307082	0.133405	-2.30187	0.0213425	0.247971	ENSMUSG00000024644	53.5685	41.6087	52.0287	60.3118	66.9553	49.0605	68.2615	60.4151	62.9755	2829	1764	1557	2621	2038	2765	3409	1946	2985	2193.86	1799.83	2178.8	2532.79	2742.44	2019.51	2689.53	2611.27	2681.22
Dele1	352.362	-0.455937	0.19816	-2.30086	0.0213998	0.248431	ENSMUSG00000024442	7.61257	5.16358	6.6493	7.49682	8.39378	9.84607	7.59915	11.0541	9.32542	427	239	228	351	254	602	413	305	434	323.972	232.1	289.401	327.154	357.262	421.167	311.132	496.487	412.579
Surf2	3517.15	-0.260163	0.113156	-2.29915	0.0214962	0.249345	ENSMUSG00000014873	121.658	109.824	119.459	151.312	157.59	119.538	147.469	138.669	135.638	4119	2952	2234	4155	3122	4461	4793	2651	3900	3151.49	3004.7	3165.07	4019.77	4082.6	3112.34	3675.27	3790.64	3652.44
Sap30l	525.451	-0.331819	0.144464	-2.29689	0.0216249	0.250426	ENSMUSG00000020519	22.8584	18.9812	21.8907	26.2404	27.6349	22.7664	27.1883	29.1764	29.0761	604	399	331	566	423	660	691	465	692	470.211	412.398	460.449	553.496	568.534	470.713	538.058	633.409	621.791
Mok	8.40284	2.06105	0.897279	2.297	0.0216186	0.250426	ENSMUSG00000056458	0.243378	0.379205	0.819361	0.158806	0.11173	0.168789	0.043161	0	0.18631	7	15	10	5	4	12	3	0	8	8.51651	14.0153	29.3178	5.69835	3.91023	5.93666	1.45302	0	6.77767
Glcci1	4042.84	0.27724	0.120732	2.29632	0.0216573	0.250596	ENSMUSG00000029638	39.4759	38.4138	40.3165	34.5333	27.3666	34.1572	32.1962	35.8672	32.8759	5850	4149	3427	4172	2338	5324	4594	3015	4496	4469.21	4593.32	4666.67	4009.32	3098.74	3886.6	3506.56	4285.5	3869.66
Trim30b	31.5902	1.39889	0.609647	2.29459	0.0217567	0.251507	ENSMUSG00000052749	0.728234	0.942554	1.03225	0.222604	0.081566	0.313147	0.714414	0.136429	0.593105	33	70	26	17	4	35	52	6	50	42.6747	58.3381	61.8527	13.3762	4.78034	18.4443	40.2763	8.43745	36.132
Atp11c	1455.15	0.341812	0.148982	2.29433	0.0217717	0.251507	ENSMUSG00000062949	15.172	12.2279	12.5519	12.3686	8.87435	10.679	12.2441	10.8456	8.72778	2415	1549	1132	1629	826	1857	1843	1074	1241	1883.16	1603.03	1593.04	1574.21	1101.62	1332.27	1462.08	1420.7	1126.18
Tspan32	1280.52	-0.463503	0.202191	-2.29241	0.0218821	0.25176	ENSMUSG00000000244	40.8561	37.2312	39.8528	52.1981	76.7352	34.2852	61.0865	51.3593	53.9286	1404	941	772	1352	1404	1272	1890	982	1563	1035.69	996.678	1032.85	1356.61	1945.36	873.172	1489.52	1373.81	1421
Kpna2	10522.2	-0.414384	0.180689	-2.29336	0.0218275	0.25176	ENSMUSG00000018362	228.598	175.608	225.812	324.454	353.53	202.188	337.303	251.614	230.483	11726	7231	6584	13715	10584	11346	16462	7937	10680	9156.99	7429.11	9248.85	13327	14163.4	8140.31	12998.6	10637.2	9598.25
Pold4	158.49	0.719219	0.313741	2.2924	0.0218829	0.25176	ENSMUSG00000024854	14.1781	18.64	10.4605	6.50862	6.27752	7.69003	8.16773	10.5705	13.957	257	271	112	98	71	143	155	115	243	204.764	284.334	154.476	96.3876	90.6723	111.629	113.484	161.115	209.551
Polr3e	4385.11	-0.279133	0.121762	-2.29245	0.02188	0.25176	ENSMUSG00000030880	58.3766	51.2714	60.2771	71.3239	83.4831	67.5852	73.7739	57.3582	64.0514	4926	3539	2830	4963	4107	6363	5830	3041	4928	3860.27	3580.98	4075.75	4836.3	5521.17	4492.06	4693.34	4002.95	4403.21
Suco	1829.04	0.55783	0.243293	2.29283	0.0218577	0.25176	ENSMUSG00000040297	20.6618	31.3941	13.6927	14.2337	17.5097	20.7541	13.0248	12.4829	12.9743	2297	3169	1054	1682	1173	3100	1868	1100	1527	2125.6	3411.85	1440.66	1501.89	1802.52	2146.1	1289.46	1355.63	1387.61
Gm42870	693.822	0.481189	0.210075	2.29055	0.0219892	0.252777	ENSMUSG00000105128	14.1972	12.5115	8.51997	8.89251	9.05515	11.5223	8.38437	6.18777	7.14881	1289	915	437	669	481	1148	724	347	589	1008.47	938.683	618.834	647.713	643.293	822.65	572.969	463.875	527.905
Snx29	84.8816	1.00066	0.437098	2.28932	0.0220607	0.253393	ENSMUSG00000071669	1.87749	6.5832	2.2944	0.97474	2.0713	1.67277	2.12291	1.6043	2.59609	90	248	54	35	44	84	87	46	101	64.1346	237.52	80.1422	34.1431	70.764	57.4336	69.7665	57.8372	92.1927
Ddx3x	10379.9	0.313916	0.137192	2.28815	0.0221287	0.253967	ENSMUSG00000000787	113.07	114.494	133.306	101.624	78.7157	115.95	101.429	87.5084	102.199	13944	11271	9355	10424	5697	15760	11935	6676	11517	10935.2	11695.2	13182.6	10077.9	7613.6	11271	9437.06	8931.65	10275.1
Isca2	2676.15	-0.298683	0.130579	-2.28737	0.0221743	0.254284	ENSMUSG00000021241	153.62	130.314	150.343	180.903	209.327	145.71	199.913	179.949	164.963	2999	2235	1699	2915	2431	3195	4088	2089	2944	2402.55	2152.6	2404.26	2901.13	3274.18	2290.48	3007.91	2970.15	2682.08
Cd22	635.256	0.587965	0.257105	2.28687	0.0222036	0.254412	ENSMUSG00000030577	13.7862	11.3927	18.7798	5.41887	10.1932	8.68715	9.43152	12.8159	12.3336	829	759	688	340	409	704	596	505	823	751.186	655.657	1046.41	302.768	555.477	475.768	494.408	736.984	698.643
Fam234a	413.303	-0.573904	0.251081	-2.28573	0.0222699	0.254566	ENSMUSG00000024187	7.3204	4.7559	5.34642	7.12462	10.2304	5.3574	11.1887	11.1624	7.47013	535	249	217	427	418	390	615	391	487	383.287	263.008	286.239	382.516	535.717	281.941	563.596	616.811	406.611
Rpusd1	221.914	-0.464917	0.203401	-2.28571	0.0222711	0.254566	ENSMUSG00000041199	6.60347	4.00009	5.55425	6.64497	8.11239	7.45522	7.70223	6.29475	8.81585	272	130	131	227	197	332	302	158	330	212.219	135.778	182.521	218.979	260.743	240.817	238.138	213.499	294.536
Lsm11	547.111	-0.349371	0.15284	-2.28586	0.0222625	0.254566	ENSMUSG00000044847	6.1284	4.16145	4.07865	6.22389	6.39759	6.02236	6.47864	5.6989	6.21074	677	382	329	583	425	818	776	485	609	577.737	414.358	393.166	601.65	603.188	570.643	587.581	566.997	608.679
Rbm38	1328.24	-0.327134	0.143153	-2.28522	0.0223002	0.254692	ENSMUSG00000027510	33.4863	26.9121	28.7591	31.2709	44.0616	38.6312	33.7632	38.6079	39.6396	1611	1056	804	1237	1195	2006	1535	1137	1643	1248.1	1059.56	1096.18	1195.18	1643.05	1447.19	1210.34	1518.71	1535.82
Sugp1	1981.86	-0.268619	0.117734	-2.28158	0.0225143	0.256101	ENSMUSG00000011306	32.3192	29.8926	33.4186	37.8722	44.0196	32.9482	41.4377	39.9309	36.9071	2204	1636	1288	2134	1757	2476	2689	1676	2288	1723.81	1683.99	1822.61	2071.32	2348.17	1766.35	2126.31	2247.73	2046.45
Srl	53.4789	0.970413	0.425291	2.28176	0.0225035	0.256101	ENSMUSG00000022519	2.15385	2.00885	1.2987	0.99081	1.51377	1.38244	0.638928	0.655098	0.53317	49	35	36	59	46	71	59	40	47	91.069	89.7118	56.1487	42.958	64.0128	58.7512	25.99	29.2326	23.436
Mrpl20	4013.03	-0.26461	0.115966	-2.2818	0.0225012	0.256101	ENSMUSG00000029066	306.539	280.887	279.399	368.071	373.977	324.528	311.358	369.046	355.981	4728	3400	2507	4581	3309	5458	4623	3369	4895	3659.18	3541.42	3410.35	4505.34	4464.74	3893.72	3575.68	4649.27	4417.61
Rundc1	1075.11	-0.308873	0.135338	-2.28222	0.0224762	0.256101	ENSMUSG00000035007	16.3671	11.8443	13.1486	17.9779	19.5542	15.5334	18.3322	16.8484	15.4021	1374	800	624	1250	960	1431	1464	873	1173	1074.8	820.912	883.116	1210.63	1284.13	1025.29	1157.97	1167.77	1051.42
Taf1a	1777.78	-0.286867	0.125721	-2.28178	0.0225024	0.256101	ENSMUSG00000072258	29.9762	34.7026	30.7985	40.4777	44.3644	39.9848	43.3628	35.649	32.7192	1818	1691	1058	2028	1571	2661	2507	1329	1798	1420.92	1737.42	1492.79	1967.47	2103.2	1905.04	1977.48	1783.39	1612.34
Btaf1	3747.23	0.430355	0.188766	2.27983	0.0226175	0.256736	ENSMUSG00000040565	26.7338	35.6712	28.7096	20.598	22.0399	33.5359	19.4878	20.2799	21.2751	5072	5368	3065	3121	2374	6354	3473	2327	3630	3871.08	5455.53	4250.84	3058.4	3191.78	4880.85	2714.78	3099.16	3202.62
Tasor	4164.44	0.350913	0.153929	2.27971	0.0226248	0.256736	ENSMUSG00000040651	44.9658	46.3095	55.8585	35.1939	35.4578	49.9127	46.226	32.7741	34.5096	5862	4854	3643	3731	2625	6578	5405	2482	3668	4347.77	4728.83	5522.76	3488.72	3429.17	4850.22	4299.42	3344.36	3468.67
Gm38329	72.3679	0.821901	0.360454	2.28018	0.0225969	0.256736	ENSMUSG00000103632	14.9517	29.8352	15.038	11.9112	8.89727	16.4577	9.30927	13.2597	8.87776	96	146	58	59	32	116	60	50	50	73.9571	155.871	76.0594	60.4148	44.0148	81.8227	44.3001	69.2198	45.6514
Slc12a2	1343.88	0.358284	0.157215	2.27894	0.0226709	0.256805	ENSMUSG00000024597	11.7982	9.85761	12.0969	9.24385	8.53496	11.1689	7.32123	7.68789	9.15465	2060	1386	1195	1333	874	2120	1218	837	1454	1612.51	1423.01	1690.6	1295.51	1166.66	1534.31	962.66	1108.92	1300.75
Tulp4	814.578	0.390024	0.171165	2.27864	0.0226884	0.256805	ENSMUSG00000034377	21.5989	28.2302	20.2634	14.6336	17.2159	21.082	22.0367	16.2786	17.6202	1070	1555	656	597	474	1065	1003	534	763	868.898	1199.61	833.381	603.3	693.14	852.288	852.461	691.056	737.064
H1f2	29.9242	1.4579	0.639849	2.2785	0.0226966	0.256805	ENSMUSG00000036181	0.847094	3.14448	1.06977	0.730537	0.773584	0.289511	0.165918	0.95581	0.848759	32	95	23	23	17	12	6	22	29	24.9648	97.8794	32.2375	22.3966	22.8011	8.57581	4.70423	29.7285	26.0301
Ighv5-16	59.4341	0.728271	0.319644	2.27838	0.0227037	0.256805	ENSMUSG00000094194	18.6796	14.4793	26.1269	15.3414	13.0912	8.69159	12.7337	11.5908	10.7937	97	57	82	61	38	48	67	36	49	74.5924	61.0691	106.682	62.8189	52.2828	34.8852	48.9196	48.8479	44.8087
Shank1	4659.16	-0.368855	0.161922	-2.27798	0.0227276	0.25687	ENSMUSG00000038738	20.6572	20.9304	21.8489	23.4277	33.0358	36.1989	26.7734	24.5616	22.133	4660	3915	2620	4557	4696	8899	5697	3672	4664	3713.75	3974.52	4016.86	4318.86	5939.9	6541.1	4630.67	4660.2	4136.6
Sell	273.373	0.948427	0.416529	2.27698	0.0227876	0.257136	ENSMUSG00000026581	6.38083	8.15288	8.85007	1.85476	2.71747	1.63064	4.98823	6.04756	7.19375	381	506	323	97	101	104	320	228	426	320.652	432.729	454.757	95.5747	136.576	82.3627	241.159	320.733	375.815
Midn	170.833	0.846338	0.371689	2.27701	0.0227859	0.257136	ENSMUSG00000035621	1.99846	5.43165	2.87324	1.35503	1.08309	2.81197	1.74435	2.09689	2.55335	176	330	119	110	62	276	146	117	205	136.452	391.709	200.6	94.8707	73.9607	192.979	114.582	151.101	181.241
Dnpep	2379.88	-0.289822	0.127375	-2.27533	0.0228858	0.257266	ENSMUSG00000026209	74.4118	76.2773	70.7472	79.9892	108.492	102.186	88.8294	79.8334	89.45	2594	2230	1351	2364	2141	4134	2861	1763	2752	2034.86	2203.11	1978.24	2242.97	2967.18	2808.67	2336.95	2304	2542.93
Celf3	14.3334	-1.38892	0.610421	-2.27534	0.0228856	0.257266	ENSMUSG00000028137	0.335921	0.153573	0.23824	0.445975	0.819983	1.00103	0.731788	0.460385	0.474334	20	5	5	11	15	33	18	10	15	9.20373	4.44417	6.67449	12.5296	22.4691	27.567	19.2892	13.3124	13.5106
Cops7a	6210.34	-0.253265	0.11127	-2.27613	0.0228385	0.257266	ENSMUSG00000030127	210.355	170.159	195.231	247.165	259.015	207.043	227.194	221.337	224.467	7532	4707	4250	7186	5329	8073	8113	4778	7209	5890.99	5033.14	5590.62	7097.76	7254.61	5827.9	6121.15	6541.77	6535.08
Ccnq	1357.25	-0.346418	0.152254	-2.27526	0.0228904	0.257266	ENSMUSG00000049489	56.6612	38.9211	56.5219	67.1997	65.83	54.6233	70.719	71.7976	59.8581	1612	882	919	1563	1086	1705	1933	1235	1535	1255.57	910.933	1280.7	1526.93	1458.92	1216.6	1507.62	1679.08	1378.92
Gpn1	5232.88	-0.442748	0.194567	-2.27556	0.0228723	0.257266	ENSMUSG00000064037	107.882	81.3849	89.7512	137.955	166.744	83.4305	155.758	116.777	107.161	5787	3820	2841	6568	5556	5425	8081	4093	5578	4783.3	3811.28	4069.07	6272.45	7394.03	3718.02	6643.96	5464.4	4939.42
Txn2	7534.09	-0.263598	0.115895	-2.27446	0.0229381	0.257439	ENSMUSG00000005354	320.92	276.398	313.921	357.16	413.518	305.939	387.64	374.383	372.381	8823	5905	4878	8044	6520	9345	10129	6369	9155	6850.87	6232.06	6852.44	7818.26	8828.69	6564.45	7961.18	8434.73	8264.13
Mrps9	1831.52	-0.256165	0.11263	-2.27439	0.0229423	0.257439	ENSMUSG00000060679	68.8211	65.9033	60.5837	78.2905	85.1364	85.7867	75.6512	67.6258	79.8434	2201	1574	1088	2015	1542	2875	2251	1296	2243	1670.28	1689.36	1503.49	1948.39	2066.5	2092.68	1766.38	1732.15	2014.5
Fyn	4693.03	-0.502461	0.221187	-2.27166	0.0231073	0.257605	ENSMUSG00000019843	67.8793	68.58	42.5395	109.271	82.5864	57.5009	116.063	78.0488	71.6082	5285	3952	1865	7108	3631	4843	8231	3896	5006	4068.32	4341.32	2607.03	6715.53	4950.38	3463.91	6692.23	4936.85	4461.72
Ripk3	352.772	0.506756	0.223131	2.27112	0.0231397	0.257605	ENSMUSG00000022221	11.8394	14.9146	10.2705	9.30676	12.0569	6.96239	10.6642	6.76415	7.41834	539	449	274	361	289	359	412	195	316	409.452	544.796	363.197	330.044	417.027	242.018	354.818	246.885	266.712
Casp7	61.4399	0.759391	0.334208	2.27221	0.0230737	0.257605	ENSMUSG00000025076	2.54411	2.36614	2.55449	1.40812	1.58804	1.04433	1.04113	1.88166	2.01458	103	65	64	55	41	64	44	41	67	83.6434	82.1642	85.8769	47.4716	52.2166	34.5103	32.9307	65.2896	68.8559
Aspscr1	2055.08	-0.406086	0.17867	-2.27282	0.0230368	0.257605	ENSMUSG00000025142	64.2341	64.1526	58.7957	64.0471	90.6997	116.937	72.4036	78.2204	79.8813	2231	1644	1111	1873	1770	4152	2394	1679	2396	1694.1	1787.05	1585.61	1732.1	2392.49	3099.99	1836.99	2177.21	2190.19
Cux1	1450.35	0.356327	0.156889	2.2712	0.023135	0.257605	ENSMUSG00000029705	23.2039	22.7528	20.3599	19.1451	14.2824	20.7042	14.9632	16.5002	19.0158	2260	1885	1110	1466	769	2145	1350	1020	1575	1737.14	1799.12	1558.58	1469.7	1069.37	1557.92	1077.7	1303.67	1479.96
Cdc16	3301.23	-0.267855	0.117927	-2.27135	0.0231256	0.257605	ENSMUSG00000038416	64.9857	66.8435	69.6134	84.1467	92.0532	72.9456	96.0176	73.8814	72.9012	3728	2782	2071	3842	3030	4127	5004	2430	3489	2740.39	2977.15	3001.67	3638.56	3882.27	3091.78	3895.34	3288.03	3195.88
Shld2	540.697	-0.374394	0.164835	-2.27132	0.0231274	0.257605	ENSMUSG00000041471	10.5738	9.70428	8.69009	13.5569	15.4843	11.5613	14.5579	11.2375	9.95038	647	444	314	601	482	726	797	408	562	481.219	466.466	404.399	632.656	704.781	528.85	637.394	539.739	470.772
D830025C05Rik	21.5746	1.70451	0.750279	2.27183	0.0230966	0.257605	ENSMUSG00000043794	0.22983	2.08163	0.567849	0.265999	0.123777	0.464516	0.319182	0.558959	0.126262	13	93	8	12	4	28	17	19	6	9.27724	87.3079	23.2902	10.6389	4.89229	18.3029	12.2355	23.3113	4.91481
Pdp2	1219.74	-0.37878	0.166711	-2.27207	0.0230824	0.257605	ENSMUSG00000048371	9.29371	7.23199	8.40033	11.6621	14.3481	9.23378	11.5864	10.165	8.62615	1417	890	722	1477	1282	1545	1677	961	1195	1109.51	911.903	1025.45	1427.64	1713.14	1107.99	1330.74	1280.73	1070.59
Txk	26.4408	1.36832	0.60246	2.27122	0.0231336	0.257605	ENSMUSG00000054892	0.32417	0.956248	0.43035	0.109083	0.312294	0.302965	0.349795	0.058066	0.227524	30	73	20	7	17	36	36	4	23	24.589	76.6102	33.3785	8.48442	23.6911	23.0981	25.526	4.64831	17.9415
Lsm2	3516.96	-0.233169	0.102685	-2.27072	0.0231639	0.257671	ENSMUSG00000007050	219.96	191.482	234.968	273.37	263.553	246.932	266.798	254.811	230.209	4070	2895	2386	3927	2824	5099	4655	2779	3842	3136.91	2884.25	3426.45	3997.69	3759.07	3539.58	3660.51	3835.16	3413.05
Surf4	6285.4	-0.23641	0.10415	-2.26991	0.023213	0.257811	ENSMUSG00000014867	93.8684	76.1148	80.1969	104.573	104.215	105.575	104.957	87.1265	89.8404	7848	5085	3877	7252	5071	9759	8517	4515	6859	6173.43	5287.13	5392.96	7051.57	6854.95	6978.91	6640.85	6046.71	6142.06
Mrpl16	1819.28	-0.299586	0.131973	-2.27005	0.0232047	0.257811	ENSMUSG00000024683	71.5731	66.3833	66.8069	94.6177	91.9559	95.7178	75.8141	79.702	71.988	2084	1555	1077	2261	1552	3062	2151	1367	1825	1611.78	1578.93	1538.34	2184.88	2071.04	2166.52	1642.5	1894.22	1685.3
Gm15987	769.74	0.405024	0.178498	2.26907	0.0232641	0.257995	ENSMUSG00000085786	18.8116	19.1212	23.1497	11.1251	14.6735	19.6479	16.2099	14.5531	17.0494	1061	866	740	518	483	1216	872	504	871	829.074	890.078	1043.25	502.771	646.773	870.357	687.302	676.905	781.156
B430218F22Rik	52.7836	-0.669901	0.295236	-2.26903	0.0232662	0.257995	ENSMUSG00000097411	1.30402	1.36438	1.26925	1.7608	2.41718	2.19034	2.04178	2.22158	2.07445	47	39	26	52	51	86	70	49	67	36.6578	40.1972	36.4098	50.6613	68.4203	61.4453	54.8379	66.2762	60.1462
Map9	43.1402	1.06052	0.467531	2.26835	0.0233081	0.258054	ENSMUSG00000033900	1.1076	0.248387	0.870285	0.225413	0.370451	0.41291	0.432878	0.259392	0.454479	121	13	45	31	12	75	68	16	69	96.8738	22.9454	77.8321	20.2162	32.4044	36.2987	36.424	23.9433	41.3235
Zfp213	959.4	-0.351018	0.154738	-2.26846	0.0233012	0.258054	ENSMUSG00000071256	16.7539	12.376	14.8485	18.9621	21.7667	14.6288	19.4087	18.2906	20.274	1157	687	580	1083	878	1108	1276	777	1269	904.626	705.463	819.443	1049.89	1175	793.506	1007.7	1041.21	1137.75
Nceh1	790.133	0.402766	0.177625	2.26751	0.0233592	0.258395	ENSMUSG00000027698	10.5375	8.05604	11.94	7.53346	5.83935	9.03474	7.44969	8.49742	8.11713	1225	772	778	686	396	1127	841	613	863	954.883	771.05	1106.35	700.013	529.214	822.894	649.459	812.656	764.677
Acsl3	1056.53	0.511369	0.225599	2.26671	0.0234077	0.258395	ENSMUSG00000032883	18.3383	26.1309	22.2896	20.5458	11.898	20.6307	17.8378	13.2101	11.1187	1215	1634	674	1117	563	1821	1374	667	824	1056.51	1589.46	1312.11	1213.43	685.583	1194.33	988.294	802.985	666.059
Ifi203	752.321	0.628282	0.277181	2.26668	0.0234097	0.258395	ENSMUSG00000039997	14.0179	19.5066	13.3469	10.1358	8.22959	18.0271	10.5198	5.9859	8.86341	942	1227	626	656	398	1496	775	303	652	857.31	1260.82	835.296	635.573	503.766	1108.32	619.209	386.934	563.659
Kansl2-ps	122.418	-0.498992	0.220146	-2.26664	0.0234122	0.258395	ENSMUSG00000097530	3.70461	3.3592	3.14234	5.17956	5.50166	3.88188	5.33929	5.19488	4.3227	130	94	63	149	112	149	179	111	137	101.38	96.9052	88.181	145.203	150.277	106.444	140.167	150.213	122.994
Usp32	827.691	0.72825	0.321484	2.26528	0.0234956	0.258911	ENSMUSG00000000804	5.78665	16.0689	5.53289	4.55686	5.47471	8.36843	6.24875	3.92046	5.34865	914	1568	593	582	402	1199	836	463	847	687.66	2016.88	672.317	555.278	650.669	999.552	714.398	491.688	660.773
Cad	5206.69	0.347539	0.15341	2.26543	0.0234865	0.258911	ENSMUSG00000013629	54.2888	35.6383	42.0701	31.2999	31.5803	35.7866	32.5982	36.2014	41.2791	8551	4995	4270	4659	3016	6919	4974	3983	6994	7329.73	5082.09	5808.01	4333.3	4264.29	4856.38	4234.21	5158.34	5793.89
Terb1	43.903	-1.11267	0.491525	-2.2637	0.0235924	0.259774	ENSMUSG00000052616	0.357782	0.382011	0.513977	0.6044	1.71793	0.464127	0.81794	0.557849	1.31672	27	23	22	36	75	37	58	25	87	20.681	23.3226	30.3788	35.8241	99.3143	26.9652	45.4856	34.031	79.1241
Ifi206	204.16	0.627149	0.27714	2.26293	0.0236397	0.260092	ENSMUSG00000037849	3.73996	3.95322	5.14034	1.73739	1.83744	2.84884	3.93352	3.11318	3.3104	296	219	230	114	85	247	296	152	237	228.018	253.849	320.438	108.773	111.998	174.278	230.489	200.356	209.244
Fcrl1	7880.31	-0.239552	0.105883	-2.26242	0.0236713	0.260237	ENSMUSG00000059994	199.723	173.703	199.106	225.543	265.845	215.663	223.715	206.912	229.062	9294	6446	5277	8544	7032	10894	9664	5851	9557	7181.47	6596.91	7320.6	8315.98	9560.2	7794.28	7738.94	7851.94	8562.5
Brat1	1603.71	-0.273168	0.120775	-2.26179	0.0237102	0.260461	ENSMUSG00000000148	22.5439	18.024	19.8509	25.2733	26.536	24.7396	21.7935	25.1922	23.893	1967	1256	973	1832	1349	2396	1811	1356	1887	1537.79	1298.57	1384.6	1767.78	1810.32	1696.19	1430.19	1813.59	1694.34
Naa20	4458.52	-0.307484	0.135994	-2.26101	0.0237589	0.260535	ENSMUSG00000002728	203.193	161.098	216.591	263.261	271.586	203.13	272.997	225.593	217.137	5155	3197	3082	5342	3960	5409	6493	3430	4895	3944.34	3303.54	4299.48	5240.87	5272.38	3963.79	5098.92	4621.31	4382.07
Sik1	677.987	0.641449	0.283765	2.26049	0.0237908	0.260535	ENSMUSG00000024042	6.64022	16.9473	7.96992	5.54679	6.71652	9.81722	6.44235	7.0046	5.80212	756	1465	499	546	368	1146	513	459	553	543.25	1464.42	666.726	465.326	549.56	807.274	507.063	604.793	493.476
Mrps18b	3371.26	-0.209405	0.0926285	-2.2607	0.0237779	0.260535	ENSMUSG00000024436	170.56	165.949	165.35	203.012	207.182	197.494	184.936	186.686	194.49	3932	3025	2132	3751	2748	5049	4053	2574	3968	3033.66	3117.73	3006.95	3702.77	3685.18	3530.19	3164.49	3504.26	3596.16
Lars2	25185.6	0.298219	0.131898	2.26099	0.0237601	0.260535	ENSMUSG00000035202	341.073	397.777	349.314	327.923	249.997	331.662	285.27	310.067	286.348	33689	31610	19453	26805	14414	35821	26763	18886	25677	26319.7	32420.1	27562.2	25947.8	19293.8	25724.2	21178.4	25252.2	22971.7
Dedd	1576.83	-0.331325	0.146601	-2.26005	0.0238179	0.260629	ENSMUSG00000013973	42.3977	39.0965	36.1189	54.7699	60.1806	41.0825	55.4178	46.336	42.4304	1854	1398	890	1892	1451	1972	2117	1272	1607	1417.42	1380.43	1234.81	1876.68	2011.71	1380.11	1781.83	1634.3	1474.16
4930562C15Rik	16.8245	2.50916	1.11051	2.25947	0.0238542	0.260767	ENSMUSG00000022518	0.125518	3.74899	0.389916	0	0.252139	0.8303	0.192	0.129623	0.117919	6	145	7	0	5	33	5	1	4	3.15991	99.6854	10.0373	0	6.34838	21.0097	4.6502	3.44396	3.08614
Tuba4a	1588.34	0.398971	0.176594	2.25926	0.0238675	0.260767	ENSMUSG00000026202	48.4648	42.5829	44.1514	29.7673	27.6534	32.8234	33.0984	36.4392	46.9184	2469	1742	1217	1352	881	1898	1662	1257	2158	1986.4	1843.19	1850.06	1250.93	1133.08	1352.1	1304.87	1575.7	1998.77
Ighv1-9	46.9599	0.76236	0.337531	2.25864	0.023906	0.260986	ENSMUSG00000094694	18.3783	20.4419	15.7539	7.63157	12.8188	10.2205	10.5418	9.19967	14.8849	82	69	43	26	32	50	48	25	58	63.4999	74.599	55.6585	27.0382	44.2961	35.4939	35.0413	33.5463	53.4656
Dhx30	6416.8	-0.283077	0.125352	-2.25826	0.0239295	0.26104	ENSMUSG00000032480	109.981	102.564	87.8518	136.405	140.142	120.516	128.699	110.364	104.462	7293	5439	3853	7532	6069	8446	9068	4665	6849	6002.26	5912.08	4902.56	7633.52	7649.21	6610.84	6757.28	6356.68	5926.72
Cish	37.9659	1.59124	0.70473	2.25794	0.0239492	0.261053	ENSMUSG00000032578	0.435106	2.42959	0.192212	0.454756	0.375455	0.093557	0.462197	0.433082	0.299772	41	185	8	29	16	9	36	19	23	27.8268	164.115	12.5697	29.8226	24.0148	5.89845	28.4377	29.2311	19.7767
Actb	32590	0.366103	0.162167	2.25756	0.0239729	0.26111	ENSMUSG00000029580	965.425	1006.52	1078.31	710.879	619.658	1048.25	740.731	832.725	831.808	45963	38160	29175	27883	17189	54663	30377	24273	35742	35442	39027.9	40477.6	26760.5	22751.7	38679.5	26161.2	32263.7	31746.1
Ston2	7.25418	3.33621	1.4787	2.25618	0.0240596	0.261853	ENSMUSG00000020961	0.163163	0.530168	0.013199	0	0.012666	0.01196	0.13545	0	0	15	12	2	0	2	1	6	0	0	11.9473	41.0025	0.988284	0	0.927592	0.880256	9.5416	0	0
Ighg1	153.295	-1.1475	0.50869	-2.2558	0.0240831	0.261907	ENSMUSG00000076614	1.80641	3.19368	0.912523	2.57409	5.97611	9.07518	3.04668	4.90929	1.27899	97	153	30	114	168	475	134	159	69	74.8585	139.786	38.6674	109.382	247.683	378.003	121.465	214.709	55.1002
Aip	1392.56	-0.232694	0.103217	-2.25443	0.0241694	0.262642	ENSMUSG00000024847	56.2928	51.2673	52.1967	58.8947	63.1164	67.8175	61.7644	61.5798	66.359	1610	1152	900	1440	1046	2203	1730	1119	1772	1285.36	1236.4	1218.68	1378.94	1441.34	1556.42	1356.78	1483.94	1575.19
Usp38	1659.37	0.346344	0.153778	2.25224	0.024307	0.263552	ENSMUSG00000038250	18.182	21.3571	18.3145	17.3768	11.9093	15.404	14.9819	15.1777	17.2016	2268	2147	1293	1805	867	2114	1761	1171	1952	1774.73	2202.11	1828.32	1739.55	1162.59	1511.16	1407.09	1562.92	1745.89
Lgals3	61.1954	0.909119	0.403657	2.25221	0.0243092	0.263552	ENSMUSG00000050335	4.38373	2.91011	4.5829	2.05994	2.98871	0.956136	3.55044	1.75965	1.6719	138	73	67	54	24	32	106	35	46	95.7447	67.1316	102.35	46.1342	65.2841	20.9897	74.6024	40.5605	37.9614
Zc3h11a	6477.95	0.493188	0.218948	2.25253	0.0242888	0.263552	ENSMUSG00000102976	106.155	195.963	92.8241	98.8868	86.7711	110.684	112.44	80.1658	84.2211	7783	11157	3968	6451	3637	9030	7955	3962	6179	6265.66	12216.2	5601.36	5984.66	5122.03	6566.1	6384.56	4993.41	5167.54
Stmn1	625.721	0.470042	0.208811	2.25105	0.0243826	0.264145	ENSMUSG00000028832	41.5484	46.6088	33.7114	31.3008	24.831	23.7809	25.6012	39.0465	33.2114	978	879	458	596	340	620	582	552	708	763.42	904.695	633.786	589.863	456.555	439.245	452.547	757.536	633.84
Vsig10l	19.1245	1.10952	0.493167	2.2498	0.024462	0.264801	ENSMUSG00000070604	0.52802	0.516243	0.405483	0.238945	0.162767	0.288856	0.229242	0.144199	0.294636	24	42	7	20	6	32	22	9	27	31.7212	32.7568	24.9086	14.7196	9.77956	17.442	13.2493	9.14258	18.4012
Gm11960	13.3731	-1.73225	0.770231	-2.249	0.0245127	0.265147	ENSMUSG00000081974	0.249895	0.033925	0.097082	0.314375	0.77097	0.695774	0.246994	0.263726	0.271103	18	2	4	8	19	30	17	4	18	9.9432	1.45037	3.99452	12.9173	31.1043	28.9834	9.48899	11.0769	11.3989
Mdh2	15990.6	-0.305318	0.135776	-2.24869	0.0245322	0.265154	ENSMUSG00000019179	552.624	439.316	564.858	699.17	720.218	505.991	678.476	645.505	635.056	18458	11814	10427	18961	14234	18539	21430	13190	19312	14370.8	12066.4	15019.9	18643.8	18731.4	13225.4	16974.1	17715.7	17168.3
Atg9a	79.5452	1.18109	0.525305	2.24839	0.0245515	0.26516	ENSMUSG00000033124	0.866271	2.30815	1.7294	0.167028	0.563867	0.787186	0.676125	0.645603	1.53785	94	131	85	15	34	87	69	44	108	65.1028	183.384	132.15	12.4863	42.895	59.6674	48.9061	51.572	119.743
Kif11	83.5339	1.04852	0.466674	2.2468	0.024653	0.26561	ENSMUSG00000012443	1.14186	1.72069	0.829504	0.63881	0.612395	0.831399	0.311991	1.02713	0.206053	144	178	60	68	46	117	38	81	24	114.324	181.96	84.9216	65.5834	61.3209	83.6658	30.0515	108.532	21.4469
Wdr82	2506.78	0.261343	0.116303	2.2471	0.0246338	0.26561	ENSMUSG00000020257	39.6445	31.4996	38.1522	28.7629	28.8308	32.0276	29.6769	31.2454	33.3871	3833	2372	2065	2346	1646	3448	2661	1874	2956	2994.56	2513.06	2946.77	2227.83	2178.01	2431.59	2156.6	2490.83	2621.75
Lypla2	2899.49	-0.254282	0.113144	-2.24741	0.0246136	0.26561	ENSMUSG00000028670	92.1878	95.0557	86.582	99.0977	123.008	100.122	112.075	113.391	113.663	3357	2552	1777	2800	2508	3774	3704	2493	3684	2526.85	2751.89	2426.66	2785.27	3372.03	2758.36	2955.39	3280.12	3238.82
Ighv6-6	26.828	0.965884	0.42994	2.24655	0.0246685	0.26561	ENSMUSG00000076680	9.57317	13.471	9.58813	4.25831	3.87755	7.11946	5.13959	5.72074	7.49531	44	47	27	15	10	36	24	16	30	34.051	50.7661	34.9812	15.5797	13.8368	25.5321	17.5354	21.5419	27.6275
Pfdn1	1830.32	-0.293261	0.130596	-2.24556	0.0247325	0.266096	ENSMUSG00000024346	76.5377	72.3216	88.3483	98.1382	107.18	79.9115	100.258	101.256	100.675	1933	1452	1278	2006	1567	2214	2434	1540	2278	1502.05	1499.08	1772.89	1974.9	2103.65	1576.28	1892.91	2097.18	2053.97
Prpsap1	3244.32	-0.378556	0.16865	-2.24463	0.0247922	0.266168	ENSMUSG00000015869	100.083	73.9208	97.4744	118.148	153.6	86.5743	128.424	112.29	114.217	3848	2200	2167	3536	3230	3372	4629	2590	3979	2921.11	2278.77	2909.06	3536	4483.64	2539.75	3606.06	3458.87	3465.6
Zfp983	233.032	-0.611337	0.272334	-2.24481	0.0247806	0.266168	ENSMUSG00000035868	3.9731	1.58069	2.33561	5.098	3.75159	4.52479	4.16355	3.63614	3.0156	307	147	152	279	165	384	279	174	222	256.139	107.499	153.775	337.169	241.589	293.15	258.282	247.43	202.255
Cyb5d2	132.427	0.489923	0.218299	2.24427	0.0248147	0.266168	ENSMUSG00000057778	4.2191	2.86531	3.86877	2.92808	2.18536	2.98246	2.76506	2.49082	2.32725	179	134	123	139	80	192	152	88	123	185.585	133.12	174.009	132.07	96.1387	131.86	117.012	115.63	106.421
AC133103.1	28.5834	1.08953	0.485431	2.24445	0.0248035	0.266168	ENSMUSG00000079190	1.4526	2.10737	1.0963	0.490448	0.623399	0.43411	1.33072	0.880987	0.708321	51	60	22	14	13	17	45	19	23	39.7742	61.8497	30.7989	13.6419	17.4419	12.1452	35.2432	25.7072	20.6481
Ssr2	3557.3	-0.263398	0.117411	-2.24338	0.0248725	0.266585	ENSMUSG00000041355	180.564	154.043	160.897	208.123	209.1	172.076	194.846	216.554	200.27	4295	2920	2192	4043	2888	4487	4472	3106	4291	3346.39	3015.29	3049.1	3955.18	3875.74	3205.64	3474.14	4235.61	3858.58
Mkrn1	2490.15	-0.233354	0.104041	-2.24291	0.0249027	0.266596	ENSMUSG00000029922	89.7962	72.1225	80.5087	100.419	101.637	87.6239	101.816	94.0234	90.7346	3117	1848	1747	2648	2085	3344	3357	1894	2992	2417.32	2050.67	2216.13	2771.99	2736.91	2370.91	2636.89	2671.28	2539.29
Gm43696	483.099	-0.651915	0.290673	-2.24278	0.0249113	0.266596	ENSMUSG00000105304	2.95726	2.81955	2.23164	3.65531	6.38548	3.68992	6.73575	2.52224	2.75475	482	371	205	495	610	660	1042	255	408	377.436	380.086	291.242	478.383	815.079	473.353	827.065	339.74	365.508
Rnf115	5724.01	-0.234801	0.104707	-2.24246	0.0249313	0.266609	ENSMUSG00000028098	114.845	106.735	120.171	143.198	141.723	141.328	151.975	120.132	116.383	6456	4813	3815	6633	4656	8725	8101	4127	5910	5034.92	4942.35	5387.11	6437.49	6214.04	6227.62	6409.93	5558.33	5304.35
Aamp	7723.99	-0.246821	0.110151	-2.24076	0.0250417	0.266792	ENSMUSG00000006299	202.661	192.075	179.448	224.331	260.383	197.986	235.418	230.9	229.588	9079	6921	4571	8277	6796	9661	10105	6318	9321	7089.05	7096.37	6418.48	8046.47	9109.26	6960.93	7922.4	8524.1	8348.87
Hyal1	70.6326	-0.811027	0.36184	-2.24139	0.0250005	0.266792	ENSMUSG00000010051	1.04685	1.22194	0.794694	1.84254	2.51243	2.6949	1.45326	1.21361	1.26413	58	55	24	100	81	171	79	40	69	46.6453	57.6695	36.1579	84.2269	112.418	120.671	62.4457	56.7405	58.7185
Mfng	1463.4	-0.415918	0.185732	-2.23935	0.0251333	0.266792	ENSMUSG00000018169	41.6817	30.0742	29.8299	51.0448	56.8081	32.1192	50.5669	43.7141	39.9332	1856	1065	742	1857	1434	1551	2165	1180	1619	1438.29	1096.08	1052.51	1806.13	1960.48	1113.98	1678.67	1591.94	1432.5
Sirt1	1351.6	0.508253	0.226922	2.23978	0.0251055	0.266792	ENSMUSG00000020063	17.8121	32.3635	19.622	21.7653	12.5506	17.5522	19.2228	13.5185	15.3981	1571	2273	980	1604	701	1725	1572	744	1326	1250	2398.81	1408.03	1566.23	880.864	1238.05	1297.81	1001.22	1123.37
Ttl	122.7	-0.726815	0.324459	-2.24008	0.0250855	0.266792	ENSMUSG00000027394	1.79389	1.26322	0.667647	1.56545	2.04562	1.75642	3.16431	1.73279	2.35433	136	118	32	117	82	168	199	110	187	119.713	89.0373	45.5583	107.123	136.528	117.812	203.153	122.039	163.333
Uba3	2235.09	-0.276461	0.123358	-2.24114	0.0250173	0.266792	ENSMUSG00000030061	47.9685	37.3295	45.3073	55.4583	58.0845	46.2647	61.4127	48.5114	50.2915	2691	1637	1471	2565	1881	2883	3284	1713	2566	2107.99	1732.65	2035.9	2499.06	2552.85	2043.51	2596.39	2249.89	2297.57
Tlr4	60.9263	0.842148	0.37608	2.23928	0.0251377	0.266792	ENSMUSG00000039005	0.706051	1.56731	1.00397	0.414436	0.412591	0.791633	0.718487	0.645789	0.736741	76	136	61	37	26	53	55	43	72	54.0716	126.776	78.6192	32.5454	31.6014	60.9358	52.9362	52.1952	58.6557
Sec24d	42.2197	1.45129	0.647906	2.23998	0.0250924	0.266792	ENSMUSG00000039234	1.23831	2.23642	1.53824	0.14076	0.591408	1.58313	0.399713	0.202782	0.829485	86	48	45	12	16	82	20	12	28	52.507	100.159	66.6942	6.12022	25.0801	67.4714	16.3057	9.07456	36.5645
Gk5	180.569	0.563039	0.251368	2.2399	0.0250973	0.266792	ENSMUSG00000041440	3.04012	3.22554	2.33429	1.97354	2.04019	2.49619	2.00327	1.09351	2.19168	322	248	143	163	106	282	203	68	186	237.908	266.605	186.788	158.366	159.677	196.341	150.82	90.3126	178.302
B2m	29531.5	0.527119	0.235131	2.24181	0.0249733	0.266792	ENSMUSG00000060802	2146.39	3174.94	2265.75	1407.63	1364.91	2698.85	1330.25	1874.88	1989.85	39383	45990	23977	20887	14418	54327	23639	20445	32732	30564.2	47751.4	32990.7	20553.8	19438.5	38627.6	18223.8	28176.3	29456.9
Rps15a	15091.4	0.374965	0.167516	2.23839	0.0251959	0.267209	ENSMUSG00000008683	1238.85	1161.92	1229.19	941.695	651.029	1137.03	875.586	995.235	1047.68	22540	17122	12223	14800	7369	23282	14662	11446	16994	17778.8	17611.7	18037.3	13857.4	9344.16	16400.5	12088.9	15073.1	15630.7
Riok3	3677.97	0.336099	0.150293	2.23629	0.0253329	0.267619	ENSMUSG00000024404	80.5642	113.05	75.0748	67.2733	66.5013	75.4429	78.8096	72.2743	72.1412	4887	4331	2401	3666	2654	4960	4678	2530	3744	3729.17	5526.42	3554	3193.1	3078.42	3509.72	3509.65	3530.26	3471.02
Vps26b	45.2335	1.02993	0.460511	2.23648	0.0253201	0.267619	ENSMUSG00000031988	0.78274	1.26465	0.715022	0.786494	0.474184	0.422411	0.291774	0.189996	0.579806	72	95	37	59	26	43	26	11	47	56.5105	96.4334	52.7845	58.2244	34.2382	30.6522	20.2655	14.4765	43.5167
Jmjd1c	2080.73	0.496575	0.222077	2.23605	0.0253484	0.267619	ENSMUSG00000037876	15.7802	27.8444	19.0262	13.4638	11.9756	22.0489	16.18	12.739	14.0673	2593	3138	1733	1684	1033	3453	2178	1235	2271	1891.58	3525.3	2332.05	1654.92	1435.69	2656.52	1865.91	1611.59	1753
Tnrc6b	784.547	0.484342	0.216467	2.23749	0.0252543	0.267619	ENSMUSG00000047888	5.59581	4.95824	4.98556	3.22941	2.64498	5.84614	3.71274	3.33718	3.67335	1012	933	734	533	362	1436	844	530	969	1021.6	956.081	930.699	604.563	482.941	1072.76	652.101	642.992	697.178
Vps37c	682.537	-0.385891	0.172545	-2.23647	0.0253209	0.267619	ENSMUSG00000048832	13.7492	13.9928	9.96391	19.046	18.1637	16.7967	15.4174	17.3851	13.0957	800	603	372	840	570	976	881	569	655	602.892	648.06	446.754	856.377	796.564	740.289	650.391	804.536	596.971
Gm42421	10.4284	-1.70089	0.760487	-2.23658	0.0253138	0.267619	ENSMUSG00000104633	0.47524	0.426921	0.158286	0.800453	1.43382	1.15146	0.618997	1.74686	1.36681	7	5	1	9	12	18	9	15	18	5.41844	5.21318	1.36294	8.90682	16.2234	12.7658	6.87838	20.8636	16.2228
S1pr3	327.852	-0.666675	0.298229	-2.23545	0.0253879	0.267836	ENSMUSG00000067586	3.96265	1.42488	2.09645	4.11363	3.69354	2.87184	6.15418	3.8353	3.34015	469	136	140	404	256	373	692	281	359	367.102	139.42	198.592	390.773	342.213	267.409	548.493	374.979	321.683
Fancf	462.308	-0.41117	0.183979	-2.23488	0.0254255	0.268032	ENSMUSG00000092118	14.1973	9.29352	10.8736	18.459	14.1021	13.1664	18.4242	14.9332	13.2879	588	308	256	629	340	598	730	378	498	458.925	317.13	359.372	611.968	455.826	427.537	573.153	509.959	446.903
M6pr	20951.8	-0.296929	0.133101	-2.23086	0.0256903	0.268453	ENSMUSG00000007458	383.049	321.528	347.033	489.834	419.217	486.355	505.008	363.592	353.475	24803	16779	12706	26201	15876	34622	31139	14477	20704	19391.1	17191.3	17963.8	25426.8	21224.4	24746.5	24594.9	19425.2	18602.2
Acadvl	1743.43	-0.251847	0.112833	-2.23203	0.0256133	0.268453	ENSMUSG00000018574	45.1086	41.1103	37.7257	50.4279	55.2154	53.5077	50.9657	44.9386	43.9968	2240	1364	1067	1913	1392	2789	2419	1288	1876	1646.21	1584	1407.19	1887.08	2014.46	1962.49	1789.43	1730.64	1669.34
Dhfr	216.251	0.843245	0.378016	2.23071	0.0257003	0.268453	ENSMUSG00000021707	1.7339	4.3137	1.89902	1.24456	0.742704	2.35726	1.3496	2.0406	1.27018	248	497	153	148	62	370	183	181	165	194.169	509.294	217.242	143.077	82.8574	265.325	145.177	241.292	147.828
Anks3	1025.69	-0.324923	0.145539	-2.23254	0.0255791	0.268453	ENSMUSG00000022515	29.7109	33.0252	28.2488	35.8577	46.0486	33.4322	46.2561	34.6828	35.3988	1077	975	610	1008	1002	1309	1466	752	1218	836.673	982.275	813.422	1035.43	1296.91	946.28	1253.17	1030.77	1036.31
Mrpl43	1221.12	-0.264872	0.118664	-2.23212	0.025607	0.268453	ENSMUSG00000025208	43.4868	36.7146	42.5446	49.9506	46.84	44.9549	50.9321	50.8172	54.2753	1437	965	804	1358	899	1620	1617	1010	1587	1116.31	995.938	1116.88	1314.56	1202.58	1160.14	1258.13	1376.57	1449.01
Hspa5	84371.2	-0.263155	0.117942	-2.23122	0.0256666	0.268453	ENSMUSG00000026864	1367.54	1327.32	1371.92	1760.43	1870.17	1566.57	1895.81	1438.2	1368.31	93599	72313	52652	99768	74885	117800	122679	61553	85727	73197.8	75038.1	75086.4	96621.7	100113	84279.6	97623	81242.6	76138.6
Sec23b	3963.61	-0.280968	0.125842	-2.2327	0.0255686	0.268453	ENSMUSG00000027429	80.5932	69.5296	71.805	88.1662	108.507	80.6955	104.092	87.3104	77.5502	4716	3119	2384	4291	3769	5215	5813	3140	4152	3683.97	3356.88	3356.21	4132.56	4960.54	3707.51	4577.59	4212.02	3685.22
Xpc	1246.53	-0.342377	0.153457	-2.23109	0.0256751	0.268453	ENSMUSG00000030094	16.699	11.1711	13.7927	20.469	18.5294	17.6539	20.2182	14.9798	14.9579	1600	861	744	1569	1039	1826	1836	887	1298	1243.34	878.504	1050.08	1562.77	1379.79	1321.16	1448.25	1177.09	1157.8
Gtdc1	648.472	0.319324	0.14295	2.23381	0.0254957	0.268453	ENSMUSG00000036890	14.312	19.1616	16.3863	13.1111	12.559	14.6303	13.7791	13.3411	13.5759	802	825	530	605	402	917	749	448	707	625.871	885.386	733.049	587.64	549.278	643.135	579.282	615.072	617.536
Zfp455	156.337	-0.528564	0.236969	-2.23052	0.0257129	0.268453	ENSMUSG00000051037	2.28372	2.3387	2.10208	2.56449	3.51586	4.255	4.04342	2.88656	2.46118	149	123	80	139	143	311	258	124	151	119.513	129.621	113.277	137.785	184.126	224.28	204.33	159.861	134.244
Gsk3a	2485.21	-0.210328	0.094289	-2.23067	0.0257027	0.268453	ENSMUSG00000057177	53.8968	44.4804	51.3056	56.3235	63.2346	57.6505	60.4167	54.978	57.5604	3045	1938	1650	2631	2087	3551	3270	1920	2946	2371.5	2067.26	2309.15	2541.12	2782.57	2549.92	2558.13	2553.96	2633.28
Alg11	2990.52	-0.470495	0.210677	-2.23325	0.0255324	0.268453	ENSMUSG00000063362	26.027	20.2635	22.9319	33.756	47.4069	28.1873	39.166	24.2459	21.965	3152	2106	1691	3685	3481	3943	4873	1985	2587	2620.31	2154.71	2360.72	3484.79	4773.34	2852.3	3793.48	2576.15	2298.9
Rab11fip4os1	28.2642	2.35463	1.05482	2.23225	0.0255981	0.268453	ENSMUSG00000087434	0.308083	3.52134	0.223788	0.021957	0.124227	0.908352	0.455944	0.118098	0.02001	17	156	7	1	4	55	24	4	1	13.283	160.355	9.86597	0.970743	5.35669	39.3637	18.9121	5.37373	0.896883
Wsb1	3831.89	0.458597	0.205628	2.23022	0.0257326	0.26846	ENSMUSG00000017677	73.9836	134.822	82.5159	72.9553	64.0231	93.561	76.3587	58.1071	67.2835	4379	6247	2830	3658	2235	6091	4383	2166	3647	3455.55	6651.03	3940.9	3494.11	2990.69	4392.29	3431.16	2864.29	3267.02
Cyp39a1	13.8322	1.45321	0.651714	2.22983	0.0257585	0.268532	ENSMUSG00000023963	0.495604	0.593782	0.337649	0.106736	0.09132	0.097138	0.234442	0.164456	0.347921	30	29	11	7	3	6	14	6	25	24.4131	30.8931	17.007	5.39133	4.49892	4.8094	11.1103	8.54953	17.8168
Egln2	1551.42	-0.410512	0.184128	-2.2295	0.0257807	0.268565	ENSMUSG00000058709	34.4963	29.2217	28.5028	41.934	53.7742	27.3391	43.3658	42.5055	39.116	1813	1166	823	1810	1646	1554	2136	1330	1861	1392.06	1245.48	1176.11	1735.2	2170.26	1108.88	1683.57	1810.24	1640.97
Zfp605	192.173	0.404186	0.181365	2.22857	0.0258423	0.268612	ENSMUSG00000023284	3.40977	4.21664	3.70722	2.73348	2.59522	2.90143	2.97253	3.19667	2.93757	272	275	127	178	110	256	211	162	195	201.565	263.272	224.086	165.693	153.432	172.392	169.153	199.432	180.526
Abcb1b	1559.37	0.198697	0.0891408	2.22903	0.0258122	0.268612	ENSMUSG00000028970	24.4996	24.1882	23.4555	21.6587	20.7962	21.6165	21.5963	20.6991	20.7981	2371	1427	1314	1501	1120	1954	1791	1195	1706	1693.9	1765.53	1657.85	1535.58	1438.25	1501.58	1436.52	1510.47	1494.62
Pik3r1	611.539	0.439365	0.197148	2.22861	0.0258402	0.268612	ENSMUSG00000041417	6.99775	9.08437	6.11743	5.1796	6.04967	6.49052	4.7554	4.22503	6.51104	821	815	501	555	391	806	571	368	775	681.239	934.079	608.957	517.055	589.015	635.09	445.378	434.088	658.952
Jpt1	6867.87	-0.424604	0.190674	-2.22686	0.0259568	0.269008	ENSMUSG00000020737	251.264	207.206	212.847	323.434	353.031	180.159	324.953	338.732	298.856	7889	5108	3811	8341	6449	6119	9711	6471	8470	6128.05	5337.63	5308.09	8088.67	8611.11	4416.6	7624.58	8718.77	7577.35
Wls	178.992	0.768691	0.345185	2.22689	0.0259544	0.269008	ENSMUSG00000028173	3.45192	6.55777	2.15883	2.03924	1.66949	3.56274	2.27369	2.18936	2.79119	263	348	95	134	72	296	171	101	194	203.49	408.306	130.13	123.267	98.428	211.097	128.948	136.209	171.054
Cep128	102.781	0.695982	0.312489	2.22722	0.0259326	0.269008	ENSMUSG00000061533	1.9797	1.73184	1.74619	0.680667	1.57139	1.44196	0.787195	1.03241	1.31599	150	98	101	69	109	161	71	77	77	146.171	135.057	131.834	51.5342	116.038	107.012	55.9173	80.4495	101.013
Gm16279	222.374	-0.452015	0.20291	-2.22766	0.0259029	0.269008	ENSMUSG00000084998	3.2977	2.87259	2.58439	4.68822	4.96738	4.251	3.40256	3.48627	3.47106	251	176	111	296	221	356	247	164	240	196.299	180.661	156.967	286.806	295.683	255.014	195.226	219.558	215.149
Rpp30	2146.05	-0.238726	0.107229	-2.22632	0.0259926	0.269182	ENSMUSG00000024800	94.6544	72.4163	93.7441	100.741	106.379	100.923	109.652	99.9455	103.833	2608	1595	1508	2322	1701	3033	2859	1683	2556	2038.02	1646.84	2063.9	2224.2	2290.75	2184.11	2271.37	2271.11	2324.17
Pag1	311.982	0.551318	0.247807	2.22479	0.0260955	0.269851	ENSMUSG00000027508	2.56539	4.09924	3.75311	2.32682	1.94406	3.11676	2.83528	1.51728	2.6894	377	343	295	294	173	418	332	179	398	284.481	480.121	425.567	264.583	215.607	347.391	302.48	177.571	310.04
Gm38309	90.444	-0.670705	0.30144	-2.225	0.0260812	0.269851	ENSMUSG00000102704	1.93934	2.76754	1.91894	3.3597	4.0393	3.90841	5.10569	2.4226	2.69108	71	81	40	101	86	157	179	54	89	55.3819	83.4747	56.0338	98.3812	115.365	112.183	140.271	73.0131	79.8919
Zfp280c	846.712	0.306291	0.137697	2.22438	0.0261228	0.269935	ENSMUSG00000036916	14.0214	9.85222	14.1868	10.1451	11.1881	10.8174	10.3841	10.0696	9.53169	1270	691	808	848	686	1085	956	587	819	1048.31	777.996	1084.57	777.769	836.577	812.897	746.905	794.536	740.846
Ugp2	2524.05	-0.273298	0.122911	-2.22355	0.0261787	0.270117	ENSMUSG00000001891	52.1448	43.8132	57.7756	61.3383	67.9939	63.4186	72.8779	52.7264	57.7538	2842	1920	1775	2696	2136	3813	3713	1754	2807	2202.01	1954.16	2494.76	2656.06	2871.64	2691.78	2960.76	2349.86	2535.42
A230072C01Rik	68.8195	-0.746606	0.33573	-2.22383	0.0261602	0.270117	ENSMUSG00000086877	2.1945	1.90502	1.88543	3.93321	3.08532	5.16649	3.26337	2.7366	2.15218	64	43	30	101	53	162	95	53	60	50.8855	46.6559	44.7039	93.5199	71.5503	120.412	72.7991	66.9695	51.8799
Eif2b3	6474.34	-0.402205	0.180941	-2.22285	0.0262258	0.270136	ENSMUSG00000028683	192.442	148.926	179.339	266.357	292.85	173.882	276.747	207.716	175.993	7428	4662	3856	8381	6528	7425	10171	4888	6048	5773.18	4718.81	5501.33	8193.68	8786.47	5243.06	7987.29	6576.46	5488.76
Recql	1232.45	-0.48719	0.219173	-2.22286	0.0262255	0.270136	ENSMUSG00000030243	28.9086	24.1304	20.7573	28.0177	54.4716	26.5716	39.2439	32.8647	28.6963	1427	953	919	1111	1298	1363	1779	819	1338	1114.23	981.865	817.763	1107.68	2100.09	1029.42	1455.07	1336.31	1149.58
Gm15903	40.7005	1.6774	0.75468	2.22267	0.026238	0.270136	ENSMUSG00000086916	1.95501	0.417727	3.69394	0.301273	0.371046	1.45452	0.26252	1.35823	0.179417	56	31	24	23	20	70	23	8	15	70.2923	15.8635	135.807	11.1075	13.3426	52.5647	9.08073	51.5395	6.70632
Wdfy1	2088.39	-0.330017	0.148544	-2.22167	0.0263057	0.270636	ENSMUSG00000073643	25.9081	25.4988	20.8651	35.2228	32.7882	29.5001	36.1774	26.7145	24.0593	2542	1767	1163	2720	1635	2912	2905	1629	2106	1867.55	1941.35	1537.91	2603.5	2363.78	2137.35	2508.85	2032.31	1802.94
Slc25a36	1810.91	0.37461	0.168713	2.2204	0.0263916	0.271322	ENSMUSG00000032449	27.6184	42.499	31.1061	23.2935	29.5353	30.2912	24.313	24.2387	26.9817	2103	2526	1388	1594	1297	2807	1889	1143	1924	1697.22	2758.58	1954.71	1467.91	1815.24	1871.04	1437.4	1572.13	1723.94
Atg2a	989.307	1.05386	0.474692	2.2201	0.0264118	0.271332	ENSMUSG00000024773	8.32887	23.1784	5.67903	4.78794	5.87457	9.72782	4.61753	6.15623	5.47625	1123	2289	509	637	532	1676	662	572	829	978.188	2875.2	682.003	576.612	690.026	1148.33	521.731	763.058	668.623
Tubb6	244.807	0.465298	0.209848	2.21731	0.0266019	0.273085	ENSMUSG00000001473	10.335	8.41509	7.27989	7.97397	6.66558	6.73956	7.05905	4.53782	5.2637	446	288	179	284	168	320	292	120	206	348.516	299.722	251.023	275.731	224.803	228.433	229.012	161.497	184.529
Sap30	1171.55	-0.326818	0.14742	-2.21691	0.0266291	0.273154	ENSMUSG00000031609	51.0434	43.6943	43.7532	62.6279	58.4874	46.1886	70.7757	61.5061	52.2021	1387	945	680	1390	921	1377	1849	1009	1278	1079.98	976.449	946.594	1358.76	1237.63	982.262	1440.66	1373.41	1148.23
Irf8	28112.6	-0.253797	0.114499	-2.21659	0.0266509	0.273154	ENSMUSG00000041515	490.491	350.924	436.8	524.153	541.552	466.53	520.724	518.447	502.768	35874	20574	18042	31715	23152	37365	36221	23410	33378	28035.4	21185.4	25529	30720.8	30957.7	26802.2	28634.1	31274.2	29874.8
Fam172a	1593	0.226576	0.102229	2.21636	0.0266666	0.273154	ENSMUSG00000064138	26.0921	23.3174	23.8409	21.9346	20.1749	19.3133	23.5136	20.5824	21.1478	2199	1595	1248	1698	1071	2039	2047	1129	1699	1838.17	1735.02	1717.42	1584.55	1421.49	1367.57	1593.67	1530.31	1548.83
H1f4	30.8454	1.16538	0.525991	2.21558	0.0267203	0.273505	ENSMUSG00000051627	1.29042	1.49231	1.02089	0.361865	0.357033	0.208648	0.826401	0.815725	0.87393	62	57	28	14	10	11	38	24	38	48.4198	58.6352	39.3934	13.604	13.3984	7.86903	29.8955	32.3029	34.0903
Platr25	239.749	0.500366	0.225873	2.21526	0.0267425	0.273534	ENSMUSG00000074863	8.19755	5.74876	5.97119	4.83633	3.46069	4.17979	6.58882	4.06663	5.32418	420	258	197	209	115	281	326	150	283	359.529	266.3	268.369	217.799	151.798	184.255	278.008	188.707	242.974
Tssc4	839.531	-0.302713	0.136712	-2.21424	0.0268125	0.273853	ENSMUSG00000045752	27.7868	23.6456	25.1403	29.9854	40.0067	29.7982	30.6829	30.472	30.3769	1010	687	503	867	851	1167	1014	646	972	771.019	692.687	712.995	852.823	1109.42	830.684	818.585	891.488	876.081
P2ry10b	108.478	0.553838	0.250097	2.21449	0.0267951	0.273853	ENSMUSG00000054293	2.15349	2.44482	1.97659	1.33547	1.26817	1.48846	1.60439	2.08546	1.29909	168	153	87	87	58	127	119	100	93	131.563	157.557	123.12	83.7184	77.5385	91.4621	94.2706	134.554	82.5182
Tmem63a	100.632	0.619003	0.279771	2.21254	0.0269297	0.274652	ENSMUSG00000026519	1.92604	3.1239	1.64159	1.71748	1.69057	1.31438	1.38157	1.44629	1.28685	143	137	80	107	73	105	83	77	89	109.915	188.293	95.7923	100.503	96.4885	75.3922	75.8515	87.1069	76.3451
Trim13	46.7157	0.800472	0.361767	2.21267	0.0269204	0.274652	ENSMUSG00000035235	1.84007	2.00087	2.71739	1.42844	0.687676	1.14231	1.8106	1.26948	1.21013	69	60	58	44	15	47	65	29	41	53.8283	61.822	81.284	42.8488	20.1193	33.5874	50.9565	39.193	36.8019
Prmt1	14400.5	-0.348032	0.15735	-2.21183	0.0269783	0.274949	ENSMUSG00000109324	620.79	534.759	601.045	640.341	990.556	581.278	831.737	732.927	748.154	15500	11422	8638	14178	14686	16878	20167	12200	17486	12604.5	11468	12478.6	13331.9	20114.7	11862.6	16246.8	15705.4	15791.9
8030462N17Rik	967.949	-0.363885	0.164647	-2.21009	0.0270986	0.275975	ENSMUSG00000047466	10.5667	9.56465	10.4131	15.8356	14.8362	10.2119	15.5711	12.1359	11.0754	1096	759	605	1248	846	1127	1435	748	1010	822.198	786.055	828.498	1263.48	1154.55	798.655	1165.62	996.587	895.896
Asb3	887.209	-0.256277	0.116018	-2.20894	0.027179	0.276196	ENSMUSG00000020305	17.2359	15.9718	18.4647	20.7754	23.139	21.0453	22.8762	18.0855	18.982	1019	759	578	958	755	1375	1147	635	1004	767.096	750.785	840.3	948.118	1029.94	941.423	979.49	849.478	878.25
Rnase6	85.2781	1.01314	0.458616	2.20913	0.0271658	0.276196	ENSMUSG00000021880	5.66012	3.85192	9.75698	1.87996	1.48533	3.83395	4.81484	1.85629	5.40198	111	77	127	45	35	78	89	37	125	110.879	79.6983	195.441	37.7635	29.1004	75.4894	90.7416	38.3775	110.012
Fam136a	10724.4	-0.38316	0.173419	-2.20944	0.0271438	0.276196	ENSMUSG00000057497	321.178	230.154	294.02	401.638	463.184	262.021	420.63	358.382	322.139	12706	7290	6660	13112	10660	11382	15998	8632	11537	9932.2	7517.37	9297.23	12736	14325.6	8144.3	12514.1	11696.4	10356.4
Adsl	7044.06	-0.284748	0.128938	-2.20842	0.0272153	0.276365	ENSMUSG00000022407	165.79	128.631	150.841	178.557	214.736	153.394	181.236	189.882	177.231	8638	5261	4623	7841	6313	8735	8932	5911	8213	6707.74	5496.79	6240.38	7407.84	8689.1	6237.93	7054.41	8107.85	7454.5
Ifitm2	1651.33	-0.439243	0.198943	-2.20788	0.0272527	0.276546	ENSMUSG00000060591	167.272	132.204	99.5103	203.812	239.286	143.763	167.185	188.166	151.649	2118	1307	735	2059	1729	1997	2071	1391	1710	1637.1	1366.59	995.892	2045.57	2342.14	1414.19	1574.34	1943.17	1542.96
Nmd3	7007.9	-0.257958	0.116963	-2.20547	0.0274209	0.278053	ENSMUSG00000027787	291.815	252.257	285.311	359.273	351.182	364.462	368.857	272.752	292.286	7889	5561	4672	8280	5759	11307	9963	4942	7050	6385.1	5829.24	6383.54	8060.69	7685.6	8015.46	7764.85	6298.06	6648.53
Gpr107	2004.35	-0.43128	0.195674	-2.20408	0.0275189	0.278498	ENSMUSG00000000194	28.3598	23.5317	23.0504	43.0375	41.2943	24.7381	41.2352	26.0504	28.6193	2425	1675	1166	2404	1679	2580	2868	1309	2221	1801.45	1579.14	1496.55	2803.62	2622.7	1579.73	2519.77	1746.58	1889.56
Rnaseh1	1495.76	-0.327349	0.148532	-2.20389	0.0275318	0.278498	ENSMUSG00000020630	48.6362	37.1654	48.3619	60.7627	67.1073	45.3092	60.0734	55.1405	51.8045	1767	1055	998	1811	1389	1722	2092	1192	1671	1357.95	1096	1380.71	1739.64	1873.9	1271.53	1613.64	1624.8	1503.67
Vim	61.6919	1.12949	0.512538	2.20372	0.0275438	0.278498	ENSMUSG00000026728	1.3551	4.04456	1.52113	0.43781	1.14562	0.576302	1.98907	0.941895	1.46202	75	180	48	20	37	35	63	32	64	54.5847	172.075	62.6531	18.0836	46.1522	23.3327	77.0813	40.0413	61.2231
Tle2	12.3688	-2.17281	0.985678	-2.20439	0.0274973	0.278498	ENSMUSG00000034771	0.127858	0.111814	0.111408	0.09285	1.44133	0.42568	0.44388	0.06881	0.896964	9	8	1	5	19	12	11	3	19	3.78881	3.49962	3.37572	2.82134	42.7162	12.6787	12.6544	2.15196	27.6321
B3gnt5	1135.31	0.517609	0.235108	2.20159	0.0276946	0.279245	ENSMUSG00000022686	11.6788	17.314	17.653	9.59066	11.0888	6.8785	16.2432	9.86251	12.6721	1325	1555	1171	908	746	848	1686	695	1317	1037.08	1623.91	1602.92	873.3	984.809	613.939	1387.68	924.295	1169.84
Cdca3	29.7101	1.00022	0.454369	2.20133	0.0277125	0.279245	ENSMUSG00000023505	1.32058	1.99663	1.14568	0.498636	0.931964	0.590062	0.532869	0.900343	1.10606	64	57	22	13	17	19	25	27	32	38.1739	60.96	33.864	14.7803	26.9434	17.144	14.8191	27.4672	33.2385
Shmt2	13133.8	-0.175157	0.0795706	-2.20127	0.0277166	0.279245	ENSMUSG00000025403	301.39	283.779	280.725	326.242	344.145	344.367	324.495	313.982	324.566	15875	11499	8513	14004	10341	19496	16311	10198	15638	12310.2	12242.3	11724.5	13663.9	14058.3	14137.5	12751	13534.7	13781.7
Ssh1	198.104	0.669088	0.303932	2.20144	0.0277051	0.279245	ENSMUSG00000042121	1.33505	2.19612	1.62413	0.71804	0.807665	1.60759	0.878508	1.43577	1.11132	264	327	172	102	91	342	151	158	231	198.508	344.894	246.933	109.479	120.106	240.255	125.669	225.306	171.783
Tomm20	13798.4	-0.23355	0.106046	-2.20234	0.0276414	0.279245	ENSMUSG00000093904	168.528	177.507	159.662	192.121	218.566	194.256	198.699	216.939	183.049	15690	12698	8753	15897	10971	19773	17620	11266	14500	12024.5	13377.2	11648.6	14055.7	15596.9	13930.8	13639.3	16335.1	13577
Mrpl41	1759.28	-0.392402	0.178306	-2.20072	0.0277559	0.279441	ENSMUSG00000036850	119.599	102.466	122.436	168.286	171.415	101.001	155.783	174.363	142.166	1910	1289	1128	2160	1568	1771	2415	1639	2037	1479.18	1338.5	1548.38	2134.22	2120.29	1255.56	1853.59	2275.89	1827.89
Nipal4	6.13692	2.24984	1.02331	2.1986	0.0279066	0.279855	ENSMUSG00000020411	0.177638	0.261895	0.098259	0.080396	0.018977	0.070821	0	0.017976	0.036704	16	19	5	6	1	7	0	1	3	12.5072	19.4759	7.07414	5.80442	1.33631	5.01188	0	1.33578	2.68659
Mr1	24.759	1.30956	0.59567	2.19846	0.027916	0.279855	ENSMUSG00000026471	0.952128	0.572305	0.635948	0.063315	0.367977	0.312624	0.348457	0.540773	0.144451	52	33	27	4	16	25	22	25	10	52.9065	33.5884	36.1336	3.60763	20.4497	17.4603	18.6279	31.7128	8.34441
Atp11a	5.18152	2.49676	1.13555	2.19873	0.0278974	0.279855	ENSMUSG00000031441	0.013521	0.186027	0.132622	0.02991	0.016073	0.018481	0.032268	0.02181	0	2	15	8	5	1	3	3	2	0	1.35601	19.7049	13.6001	3.07586	1.6121	1.86295	3.11332	2.3084	0
Prdm2	897.369	0.533009	0.242366	2.19919	0.0278646	0.279855	ENSMUSG00000057637	7.07214	9.69756	5.28134	4.31226	4.01767	7.95191	4.70881	4.85762	5.0995	1322	1527	548	707	427	1721	881	554	897	1055.65	1528.9	806.102	660.044	599.788	1193.04	676.21	765.243	791.334
Mysm1	2997.76	-0.476054	0.216448	-2.19939	0.0278503	0.279855	ENSMUSG00000062627	22.6094	16.9538	20.8678	26.0909	42.6415	23.5061	36.3738	21.7622	20.3108	3305	2118	1783	3271	3437	3935	5144	1821	2756	2607.31	2064.99	2460.69	3085.26	4918.01	2724.58	4035.46	2648.57	2434.96
Gm43200	77.8424	0.95133	0.43266	2.19879	0.0278926	0.279855	ENSMUSG00000105457	2.05662	4.46049	1.29558	2.15837	1.25884	1.67344	1.38582	1.04727	0.750231	112	195	40	97	40	100	72	35	37	87.5075	200.457	56.368	94.1704	53.5693	71.5674	56.728	47.028	33.1854
Agk	1932.96	-0.314889	0.143317	-2.19715	0.0280099	0.280596	ENSMUSG00000029916	40.3623	32.6557	28.9743	44.3622	49.2583	42.8904	48.1596	34.1176	38.4433	2424	1538	1049	2289	1681	2952	2776	1303	2117	1925.59	1645.5	1413.75	2170.26	2350.38	2056.43	2210.53	1717.46	1906.77
Rmnd5a	1699.44	0.336066	0.153424	2.19044	0.0284923	0.281107	ENSMUSG00000002222	18.1192	14.4168	19.4186	13.0173	10.5551	15.2535	14.8167	14.1128	15.2362	2584	1710	1577	1513	882	2404	1857	1277	1967	2016.58	1694.7	2209.89	1485.58	1174.88	1706.33	1586.46	1657.66	1762.85
Ap1m1	2617.33	-0.28031	0.128007	-2.18981	0.0285379	0.281107	ENSMUSG00000003033	63.0111	58.5169	62.0172	72.4686	93.675	65.7635	71.9604	72.1867	74.9516	2990	2078	1696	2851	2525	3237	3369	2046	3160	2298.87	2254.9	2313.59	2711.1	3418.02	2411.56	2525.76	2779.46	2842.76
Tlcd1	1663.17	-0.339183	0.154704	-2.19247	0.0283458	0.281107	ENSMUSG00000019437	52.1011	41.688	53.5089	71.1275	74.492	49.0419	67.8844	56.6878	57.5481	1807	1313	1083	1986	1604	2167	2311	1171	1793	1464.69	1237.89	1537.47	2049.85	2094.3	1385.58	1835.74	1681.59	1681.42
Ddit4	185.838	0.593309	0.270782	2.1911	0.0284448	0.281107	ENSMUSG00000020108	6.48316	6.85097	7.45676	2.58816	4.53187	4.70569	4.384	4.81197	6.7844	280	237	183	92	114	223	181	127	265	218.576	243.958	257.064	89.4757	152.808	159.461	142.196	171.216	237.787
Rel	11158.4	0.344981	0.157128	2.19554	0.0281248	0.281107	ENSMUSG00000020275	72.1531	99.5158	68.1048	67.3464	56.5714	72.9758	73.3095	57.9973	55.8319	14554	16214	7738	11294	6691	16154	14028	7264	10237	11399.1	16605.6	11001.9	10910.1	8938.52	11588	11142.3	9670.07	9169.8
Pak2	5471.15	0.285258	0.130171	2.1914	0.0284226	0.281107	ENSMUSG00000022781	54.1973	46.5646	55.8684	43.6385	36.4415	53.1002	44.2144	40.5345	41.7969	8158	5513	4694	5424	3130	8583	6202	3753	5643	6296.53	5713.45	6636.91	5198.67	4234.21	6200.61	4941.83	4969.98	5048.12
Exosc7	4068.82	-0.315365	0.143801	-2.19307	0.0283025	0.281107	ENSMUSG00000025785	202.453	165.133	187.054	245.126	262.759	171.779	243.684	236.455	234.3	4856	3133	2564	4748	3575	4488	5525	3369	4967	3739.57	3221.65	3532.98	4642.85	4854.09	3189.19	4330.37	4609.48	4499.16
Nabp1	955.045	0.413366	0.18823	2.19606	0.0280874	0.281107	ENSMUSG00000026107	18.8305	24.8473	15.9169	16.0022	16.1091	19.2952	13.6162	12.3408	13.5526	1400	1426	676	964	602	1558	919	542	884	1054.6	1469.78	911.504	918.973	902.298	1086.15	733.638	729.413	789.058
Csrp1	134.316	1.05722	0.482974	2.18897	0.028599	0.281107	ENSMUSG00000026421	2.95055	11.4889	2.38261	1.72414	2.05605	4.266	1.83408	2.64785	3.99722	133	415	61	64	54	211	79	73	163	103.842	427.068	85.7432	62.2215	72.3697	150.906	62.0997	98.3489	146.248
Fam83d	39.5719	1.17717	0.536586	2.19381	0.0282491	0.281107	ENSMUSG00000027654	0.46194	2.73509	0.738193	0.717737	0.597242	0.524177	0.621414	0.624629	0.500278	29	133	24	34	20	33	34	24	26	21.2478	132.876	34.7195	33.8526	27.4746	24.2338	27.4985	30.3219	23.9222
Ddost	8533.26	-0.318485	0.145102	-2.19491	0.02817	0.281107	ENSMUSG00000028757	191.935	137.607	186.144	220.037	252.454	170.267	236.293	211.675	207.799	10234	5889	5628	9680	7853	9962	12022	6924	10033	7995.42	6054.46	7928.91	9399	10517.7	7129.06	9469.76	9306.02	8998.97
Atad3a	11166.5	-0.292756	0.133393	-2.19468	0.0281865	0.281107	ENSMUSG00000029036	264.214	209.121	241.063	304.439	343.779	232.561	325.988	282.084	280.342	13588	8394	6857	12882	10437	12597	15856	9182	12806	10520	8794.33	9813.83	12429.6	13689.6	9307.02	12487.1	11853.4	11604.1
Ung	853.978	-0.396654	0.180891	-2.19278	0.0283235	0.281107	ENSMUSG00000029591	18.5563	13.902	15.2272	25.8654	22.911	15.5077	24.5771	20.3901	17.7761	1012	584	487	1204	784	933	1356	688	856	803.596	635.874	674.285	1148.59	992.304	675.01	1023.95	931.909	800.286
Sema4b	260.004	0.489646	0.223568	2.19015	0.0285136	0.281107	ENSMUSG00000030539	4.52404	5.60176	5.70747	2.72886	3.26999	4.45297	3.57862	4.91607	3.84655	358	351	227	186	144	359	246	216	285	268.343	350.943	346.166	165.976	193.983	265.479	204.212	307.743	237.191
Abcb7	1371.82	0.304668	0.138757	2.1957	0.0281133	0.281107	ENSMUSG00000031333	14.2975	12.2068	12.728	11.747	8.89345	12.5729	11.5089	9.16843	10.3222	2170	1448	1089	1450	791	2079	1631	847	1392	1676.98	1512.23	1526.53	1412.84	1043.26	1482.24	1298.68	1134.93	1258.65
Tirap	508.331	-0.445085	0.202916	-2.19344	0.0282759	0.281107	ENSMUSG00000032041	7.15712	4.47002	7.0119	7.93137	11.861	9.0707	7.94387	7.09268	7.42772	606	301	391	527	462	803	702	337	546	460.865	304.168	462.261	523.979	763.781	587.124	492.63	482.445	497.724
Sft2d2	1253.02	0.482019	0.219653	2.19446	0.0282025	0.281107	ENSMUSG00000040848	10.6903	19.0344	9.48869	9.44567	10.2041	11.7452	8.63908	8.84562	8.32653	1556	2194	788	1153	875	1894	1204	805	1109	1223.97	2301.79	1110.87	1108.95	1168.44	1351.62	951.586	1068.85	991.075
Ublcp1	833.233	0.377449	0.172399	2.1894	0.0285679	0.281107	ENSMUSG00000041231	23.1688	21.0624	32.7334	16.3047	19.9228	19.2817	20.8681	19.7782	23.3874	1025	722	867	684	593	976	935	636	1092	867.999	833.437	1253.95	626.232	746.511	726.079	752.144	781.998	910.753
S100a10	483.965	0.586999	0.26814	2.18915	0.0285859	0.281107	ENSMUSG00000041959	53.3135	65.7869	55.0073	29.5558	29.6896	31.0463	32.4897	48.8579	62.0016	719	693	432	319	229	459	428	386	746	556.174	724.869	586.772	316.165	309.764	325.535	326.077	537.915	672.416
Cox10	1281.99	-0.3501	0.159806	-2.19078	0.0284676	0.281107	ENSMUSG00000042148	27.4102	21.7436	20.7145	34.4959	35.4602	24.389	33.3761	26.5599	26.1628	1566	952	760	1438	1157	1713	1748	950	1528	1243.9	1042.2	961.22	1605.24	1609.41	1112.45	1457.16	1272.05	1234.29
Sbsn	26.829	1.26669	0.577544	2.19324	0.0282902	0.281107	ENSMUSG00000046056	2.79173	5.24696	2.24279	0.510708	1.84447	2.13495	1.04964	2.36027	1.02987	36	44	9	16	26	47	16	21	13	33.8501	67.9788	28.6114	6.40319	22.9291	26.2377	12.3515	30.2514	12.8477
Riox1	1525.28	-0.341665	0.155724	-2.19404	0.0282324	0.281107	ENSMUSG00000046791	31.6248	20.4473	29.5579	38.5505	39.5158	29.8522	37.06	32.2502	31.5472	1883	978	997	1896	1374	1950	2104	1180	1702	1471.64	1004.93	1406.43	1839.62	1839.57	1395.95	1659.29	1583.79	1526.3
Rnf24	46.9617	1.7409	0.794469	2.19127	0.028432	0.281107	ENSMUSG00000048911	0.064292	2.09366	0.416593	0.423279	0.069027	0.440954	0.193144	0.128872	0.320123	10	147	37	27	6	71	29	12	25	6.27168	216.447	42.0955	43.1427	6.42171	43.7608	18.4336	12.8078	33.2746
Calcrl	88.3136	0.892019	0.407051	2.19142	0.0284214	0.281107	ENSMUSG00000059588	1.72055	1.12448	1.43729	0.818557	0.597366	1.14949	0.260182	0.755361	1.02888	133	104	96	76	42	151	29	55	109	150.49	103.882	128.547	73.4155	52.2557	101.056	21.8936	69.7271	93.5554
Gemin2	1477.67	-0.358869	0.163868	-2.18998	0.0285253	0.281107	ENSMUSG00000060121	44.9615	35.454	47.4846	61.1774	61.0615	44.5653	69.1576	51.1588	44.9582	1661	1046	972	1856	1252	1838	2351	1140	1506	1280.9	1066.81	1383.26	1787.17	1739.28	1276.11	1895.85	1538.16	1331.51
Crem	545.924	0.609584	0.278123	2.19178	0.0283955	0.281107	ENSMUSG00000063889	22.1123	41.5224	21.1192	25.4064	16.8467	11.2361	20.6048	21.1361	17.7906	691	1005	472	608	334	359	626	353	471	537	1064.54	524.186	632.733	408.973	274.15	481.024	541.755	448.958
Ipo7	5346.14	0.555139	0.25354	2.18955	0.0285569	0.281107	ENSMUSG00000066232	85.1899	85.7484	78.069	67.2877	35.4336	93.3982	39.7118	52.2412	54.0597	9188	6777	4561	5755	2024	10276	3930	3287	4965	6792.65	7221.46	6365.11	5501.56	2825.66	7485.23	3046.29	4396.13	4481.12
Cbfa2t2	1721.5	-0.399943	0.182763	-2.18831	0.0286467	0.28138	ENSMUSG00000038533	15.7402	13.4753	12.4825	19.9416	25.4896	14.2204	20.0515	17.1093	14.7193	2028	1331	961	2042	1886	2047	2402	1349	1647	1567.07	1416.98	1270.74	2035.83	2538	1423.05	1920.54	1797.75	1523.52
Yju2	890.186	-0.32369	0.148019	-2.18681	0.0287565	0.281581	ENSMUSG00000003208	19.0868	20.4855	21.4689	22.5905	30.9309	24.7532	27.0229	28.2681	21.2705	904	776	596	859	850	1280	1160	772	907	696.062	789.402	800.816	844.777	1128.86	907.703	948.339	1088.53	807.179
Rpain	630.645	-0.326291	0.149183	-2.18719	0.0287286	0.281581	ENSMUSG00000018449	49.4532	38.9775	47.6077	64.905	61.2781	47.0509	63.9265	55.2133	52.5461	711	491	416	745	516	757	926	513	715	574.201	478.002	565.225	772.762	711.586	549.1	714.085	676.58	634.266
Golt1b	2239.3	-0.399848	0.182857	-2.18666	0.028767	0.281581	ENSMUSG00000030245	34.9178	25.7447	37.1811	47.4525	57.2477	32.4753	47.8787	38.9501	37.0403	2391	1485	1506	2799	2381	2530	3297	1630	2394	1931.4	1504.05	2102.93	2691.43	3166.92	1805.48	2547.82	2273.74	2129.92
Psmf1	2369.38	-0.238146	0.108896	-2.18692	0.0287482	0.281581	ENSMUSG00000032869	50.2181	39.4702	45.8451	57.1603	56.5618	49.1105	56.7664	49.3334	54.1529	2935	1769	1646	2788	1888	3121	3182	1713	2939	2296.52	1906.45	2143.77	2680.42	2586.94	2257.35	2497.48	2380.99	2574.5
Entpd4	567.839	0.598442	0.273599	2.1873	0.028721	0.281581	ENSMUSG00000095463	15.9758	9.14682	14.2808	8.65865	10.6514	6.22599	11.7148	10.7067	4.65012	1310	495	529	577	448	511	738	525	205	874.151	528.387	798.915	485.358	582.386	342.59	616.15	618.204	264.405
2210016L21Rik	1298.67	-0.26022	0.119061	-2.18559	0.0288453	0.281957	ENSMUSG00000029559	27.4816	25.3525	23.1505	27.8452	33.6575	31.1347	35.0426	30.2804	26.6705	1596	1170	789	1331	1024	1901	1894	1017	1352	1212.84	1181.77	1044.72	1260.12	1485.65	1381.09	1487.86	1410.36	1223.64
Zfp235	221.099	-0.405717	0.185623	-2.1857	0.0288376	0.281957	ENSMUSG00000047603	4.28965	3.17514	4.30265	4.18335	5.81285	5.74618	5.50485	4.87425	5.34313	241	142	126	213	196	334	333	196	283	194.368	151.954	199.349	194.368	263.417	261.696	239.966	233.086	251.687
Gm8899	80.451	-0.560854	0.256887	-2.18327	0.0290158	0.283426	ENSMUSG00000111847	2.9594	2.08745	2.24959	3.21474	4.56755	3.66074	3.57272	3.43086	3.40369	93	52	40	83	83	126	108	65	97	72.482	53.6557	55.8672	80.9833	111.432	89.9607	84.4039	88.1638	87.1097
Zfp458	92.226	0.724854	0.332102	2.18263	0.0290633	0.283694	ENSMUSG00000055480	1.2037	1.55194	1.81069	0.937905	1.10694	1.45586	0.822751	0.750939	0.52042	119	132	104	83	66	158	78	48	50	96.5181	131.436	148.461	77.1165	88.7702	117.334	63.4686	63.5479	43.3816
Atp6v1b2	5475.11	-0.298144	0.13665	-2.18181	0.0291236	0.28389	ENSMUSG00000006273	87.4386	81.4691	86.6251	109.951	122.915	90.0529	130.284	96.27	87.8788	6111	4481	3399	6406	5022	6733	8572	4159	5605	4752.77	4677.18	4814.63	6128.31	6681.93	4919.9	6812.94	5522.56	4965.8
Bloc1s2	2834.19	-0.244421	0.112014	-2.18206	0.0291048	0.28389	ENSMUSG00000057506	201.299	153.147	183.043	209.406	219.355	198.326	217.618	209.555	231.03	3568	2118	1881	3000	2240	3853	3690	2227	3710	2769	2225.23	2574.6	2954.22	3017.52	2741.83	2879.57	3041.62	3304.12
Septin9	77.3606	0.752031	0.344757	2.18133	0.0291588	0.284036	ENSMUSG00000059248	1.24591	2.09195	2.06546	1.09993	0.699038	1.62478	0.850579	0.919475	1.25046	95	115	76	69	31	120	67	43	86	71.5954	126.968	121.364	64.8126	40.1745	93.8439	47.0233	55.7626	74.7012
Phf8	1194.36	0.353783	0.16222	2.18088	0.0291924	0.284168	ENSMUSG00000041229	16.0084	13.5312	18.5709	12.5836	10.8827	14.7472	14.7865	9.61996	13.4878	1776	1166	1155	1159	701	1746	1453	656	1327	1362.46	1216.36	1616.17	1098.2	926.332	1261.54	1210.72	864.088	1193.39
Alkbh2	183.881	-0.487921	0.223786	-2.1803	0.0292354	0.284389	ENSMUSG00000044339	10.9836	9.21985	6.80656	14.5359	12.1819	11.4912	11.0039	15.0873	12.6446	218	130	80	241	145	261	228	182	223	171.601	151.735	109.012	232.495	190.078	180.178	165.731	248.64	205.457
Myg1	1577.68	-0.284093	0.130483	-2.17725	0.0294623	0.285749	ENSMUSG00000001285	77.414	64.4077	64.2564	86.7977	87.5797	72.3979	103.398	74.6892	83.6559	1903	1287	912	1712	1360	1953	2183	1302	1947	1514.73	1330.64	1285.6	1741.68	1713.89	1423.5	1945.68	1542.32	1701.1
Tbcb	1917.37	-0.34577	0.158789	-2.17754	0.0294405	0.285749	ENSMUSG00000006095	105.385	82.6355	82.6054	99.1017	93.6885	143.808	116.972	121.69	119.136	2249	1514	1076	1874	1406	3341	2287	1740	2387	1852.19	1534.43	1484.69	1785.75	1646.39	2540.57	1978.18	2256.85	2177.25
Psmb1	7590.91	-0.194466	0.0893252	-2.17706	0.0294764	0.285749	ENSMUSG00000014769	208.555	182.448	203.076	225.946	221.707	244.256	224.769	231.426	225.209	9114	6387	5031	8133	5641	11747	9377	6185	8905	7115.37	6574.51	7084.54	7904.59	7565.01	8376	7377.58	8332.87	7987.76
Cpsf1	6038.02	-0.240563	0.110472	-2.17758	0.0294372	0.285749	ENSMUSG00000034022	248.154	245.755	231.528	251.681	323.747	312.242	281.442	295.219	270.73	7364	5183	3984	5951	4937	8908	7344	5088	6820	5385.58	5633.29	5137.97	5600.94	7027.02	6811.11	5876.27	6761.81	6108.17
Zfp931	60.497	0.714698	0.328144	2.178	0.0294058	0.285749	ENSMUSG00000078861	3.0691	3.61085	3.53117	2.90069	2.80971	1.39989	1.74256	1.9123	1.98364	85	83	64	72	40	47	55	37	55	71.4074	88.8707	83.9978	68.5719	65.1888	32.9839	39.1762	46.5632	47.7132
9430015G10Rik	1095.07	-0.323112	0.148478	-2.17616	0.0295433	0.286095	ENSMUSG00000059939	19.6078	17.3891	19.3423	23.7724	31.4234	22.2721	23.5445	19.7176	22.0751	1200	912	701	1250	1052	1589	1379	713	1293	955.003	894.543	963.297	1187.27	1530.67	1090.32	1103.23	1013.53	1117.74
Exosc5	3113.56	-0.34427	0.15821	-2.17603	0.0295526	0.286095	ENSMUSG00000061286	132.86	104.25	109.28	144.059	174.826	108.967	144.288	156.841	158.433	3748	2420	1751	3488	3169	3452	4098	2518	3837	2964.7	2456.81	2492.9	3295.79	3901.79	2444	3097.37	3693.34	3675.33
Zgrf1	272.181	0.680398	0.312756	2.17549	0.0295934	0.286293	ENSMUSG00000051278	2.86218	5.05868	2.47341	2.23201	2.72153	3.40772	1.98516	1.48395	1.42848	355	450	190	209	218	430	229	144	214	290.551	542.387	256.742	232.337	276.306	347.699	193.875	158.983	150.752
Ccdc88c	1392.46	0.310143	0.142596	2.17498	0.0296319	0.286461	ENSMUSG00000021182	21.9048	24.5158	21.4409	16.3498	15.6787	22.1192	19.81	17.1322	19.7875	1895	1831	1067	1199	758	2138	1475	1069	1572	1507.4	1781.9	1508.73	1153.72	1079.08	1529.94	1311.52	1244.25	1415.61
Rpl39	7940.5	0.42023	0.193234	2.17472	0.0296514	0.286461	ENSMUSG00000079641	1079.49	918.71	1162.84	761.274	566.997	949.905	623.402	898.701	952.102	12370	8191	7803	6928	3691	11944	7001	5996	9692	9548.36	8582.81	10517.4	6905.13	5016.48	8445.46	5305.03	8388.97	8754.82
Srebf1	1751.23	-0.274806	0.126382	-2.17441	0.0296743	0.286485	ENSMUSG00000020538	23.6863	20.0045	20.8452	23.0232	28.1165	29.9319	23.9028	25.4124	27.368	2090	1511	1058	1671	1511	2936	1891	1466	2107	1650.24	1472.26	1485.19	1644.94	1958.95	2096.12	1602.48	1868.43	1982.5
Eif3a	25805.4	0.237702	0.109341	2.17396	0.0297078	0.286613	ENSMUSG00000024991	259.074	252.803	302.28	228.605	217.406	264.289	256.738	206.397	225.226	34617	25891	22333	25334	16615	38170	31975	17307	27082	26722.7	27541.4	31881.7	24179.1	22427.5	27399.9	25476.9	22468	24151
Wdr61	5835.32	-0.315792	0.145283	-2.17364	0.0297324	0.286655	ENSMUSG00000061559	245.742	183.882	245.93	314.723	315.788	223.402	310.492	278.458	255.464	6877	4159	3924	7149	5112	6866	8309	4650	6457	5349.13	4227.46	5473.34	7025.4	6874.67	4888.11	6501.93	6396.83	5781.01
1810013L24Rik	1040.82	0.576424	0.265342	2.17238	0.0298268	0.287203	ENSMUSG00000022507	16.8259	38.6393	17.6788	16.9736	13.1444	22.5465	18.4594	14.852	14.2195	1154	1626	745	943	536	1676	1185	639	955	889.76	2158.1	955.926	920.381	695.164	1198.37	939.102	828.87	781.704
Etohd2	278.874	0.779112	0.358651	2.17234	0.02983	0.287203	ENSMUSG00000089875	2.19362	8.35581	2.49044	2.72024	2.45775	2.7551	3.02274	2.42457	2.25363	272	814	154	252	152	384	241	140	233	187.517	753.424	217.894	238.098	209.698	236.82	248.32	218.054	200.043
Arpc5l	5261.07	-0.229964	0.10588	-2.17193	0.0298609	0.287304	ENSMUSG00000026755	173.07	183.352	195.608	227.585	232.622	203.691	246.308	188.918	213.441	5406	5511	3075	5309	4455	8305	6692	3988	6154	4322.79	4836.99	4995.78	5828.86	5810.93	5113.61	5918.62	4979.9	5542.17
Rbl2	435.58	0.552711	0.254542	2.1714	0.0299012	0.287496	ENSMUSG00000031666	7.1927	5.2434	7.38788	3.0524	2.99904	5.46651	4.79894	4.41536	6.46086	813	399	470	223	204	574	456	303	671	588.65	452.811	618.778	255.932	245.419	449.694	377.774	381.667	549.495
Lcorl	819.352	1.0953	0.504669	2.17034	0.0299812	0.287714	ENSMUSG00000015882	7.03235	25.1707	4.90038	6.98768	5.62254	6.59328	7.21604	4.49357	4.83601	955	1558	391	738	378	1052	918	370	631	693.742	2622.76	493.97	706.861	554.552	653.885	684.669	467.635	496.092
Nelfe	1838.26	-0.269037	0.123979	-2.17002	0.0300055	0.287714	ENSMUSG00000024369	74.5593	60.0906	67.1754	83.0832	90.5281	67.654	86.2299	82.1666	81.9901	2298	1420	1185	1948	1560	2233	2565	1508	2213	1748.8	1488.65	1611.11	1998.25	2123.61	1594.95	1945.79	2033.95	1999.23
Dido1	2941.77	0.535733	0.246793	2.17078	0.029948	0.287714	ENSMUSG00000038914	20.3718	39.1705	21.3905	17.0603	16.0918	29.4514	16.8427	16.7312	17.5723	3724	4623	2125	2524	1466	5307	2746	1873	2847	2711.24	5506.13	2910.96	2328.23	2141.89	3939.68	2156.52	2350.02	2431.25
Tmem250-ps	969.006	-0.401577	0.185045	-2.17016	0.0299947	0.287714	ENSMUSG00000087679	15.8527	14.1307	17.1326	19.2012	28.0077	14.9785	21.5506	22.9011	19.2677	1005	720	615	1006	1037	1042	1302	893	1107	785.596	739.616	868.149	975.715	1388.12	746.071	1027.44	1197.73	992.627
Gm26520	56.9412	0.9514	0.438567	2.16934	0.030057	0.288012	ENSMUSG00000097429	2.20761	5.27032	1.70427	0.933106	1.57027	2.06568	1.56621	1.30778	2.24961	75	143	33	26	31	77	51	27	69	58.479	147.456	46.1629	25.3459	41.6012	54.9992	39.9144	36.561	61.951
	2743.65	-0.330728	0.152507	-2.1686	0.0301128	0.288049	ENSMUSG00000006471	57.7995	47.7031	38.023	59.4917	76.0356	59.3824	62.6942	54.6205	53.4	3560	2270	1422	3046	2509	3739	3687	2141	3005	2758.75	2404.85	1856.16	2912.14	3630.57	2849.2	2879.12	2752.18	2649.92
Zmat5	849.598	-0.316935	0.14627	-2.16678	0.0302519	0.288049	ENSMUSG00000009076	56.5312	50.4876	61.2177	62.7557	74.4164	58.7047	72.4693	78.2685	76.7623	926	653	578	828	698	1052	1154	759	1127	717.741	677.201	794.635	816.701	944.888	748.662	885.012	1048.67	1012.87
Sfpq	7797.26	0.278512	0.128529	2.16691	0.0302416	0.288049	ENSMUSG00000028820	173.458	189.18	217.045	147.086	140.288	181.916	163.123	161.58	172.865	10392	7883	7639	7150	4455	10758	8893	5616	9178	7721.78	8894.98	9880.01	6713.96	6245.98	8140.22	6986.64	7591.82	7999.94
Lsm4	3875.13	-0.338767	0.156255	-2.16804	0.0301556	0.288049	ENSMUSG00000031848	203.376	206.706	243.972	241.032	294.794	246.557	242.659	315.729	328.062	3872	3107	2647	3654	3287	5107	4353	3617	5612	2994.47	3214.56	3673.14	3639.11	4341.03	3648.82	3437.31	4906.16	5021.57
Mctp2	118.845	0.744334	0.343167	2.16901	0.030082	0.288049	ENSMUSG00000032776	0.903993	1.90169	1.57061	1.01155	0.857448	0.512047	0.939687	0.681029	1.33174	130	236	126	117	77	85	131	64	94	97.3215	216.238	172.897	111.669	92.3219	55.4075	97.3257	77.3777	149.048
Vash2	36.1808	0.976352	0.450561	2.16697	0.0302373	0.288049	ENSMUSG00000037568	0.613768	0.773621	0.569442	0.422968	0.266306	0.53267	0.143485	0.315112	0.321958	63	64	33	36	16	60	14	20	30	49.3006	65.6332	46.7707	34.8381	21.3935	43.0052	11.088	26.7128	26.8849
Acap2	898.532	0.344169	0.158763	2.16782	0.0301722	0.288049	ENSMUSG00000049076	9.21298	7.99201	8.09479	7.82662	4.98709	6.35731	7.90875	6.4409	6.75033	1320	993	725	1029	426	1139	1130	621	1008	1116.02	1022.52	1002.66	972.172	604.185	774.031	921.705	823.423	850.075
Eif4a1	28945.7	0.370082	0.170752	2.16736	0.0302071	0.288049	ENSMUSG00000059796	1091.44	1182.48	831.811	1037.83	867.719	794.069	655.518	769.319	736.186	45587	34449	20067	35162	20651	36146	26424	19660	27789	34977.7	40024.8	27257.8	34105.1	27811.3	25577.6	20210.4	26019.6	24526.9
Cfap74	9.14345	2.3673	1.09263	2.1666	0.0302651	0.288049	ENSMUSG00000078490	0.273893	0.687385	0.2836	0.084928	0.284888	0.07163	0	0.064792	0	17	18	8	7	10	4	0	3	0	12.2925	33.2748	13.2907	3.99133	13.0585	3.2997	0	3.08348	0
Gm37472	69.1212	1.52144	0.702164	2.16679	0.0302507	0.288049	ENSMUSG00000102151	0.542325	3.31745	0.331296	0.101466	0.527083	1.14177	0.364015	0.302332	0.576748	58	286	20	9	33	134	37	20	56	45.3911	293.266	28.3532	8.70825	44.1208	96.0514	29.311	26.7055	50.1833
Prmt5	8166.42	-0.308119	0.142339	-2.16468	0.0304119	0.288942	ENSMUSG00000023110	148.483	116.353	138.049	176.208	209.675	136.233	178.741	156.48	151.263	9642	6233	5303	9252	7864	9738	11096	6395	9079	7609.22	6297.77	7233.91	9259.5	10746.4	7017.13	8812.26	8463.06	8058.54
Nrbp1	3195.46	-0.331144	0.152983	-2.16457	0.0304203	0.288942	ENSMUSG00000029148	72.888	71.3025	68.0447	88.1483	105.571	65.9967	110.576	82.3317	88.961	3633	2456	1946	3574	2922	3441	4810	2521	4057	2737.13	2828.08	2612.82	3394.31	3964.95	2491.02	3994.87	3262.97	3472.97
Gm44667	56.2647	0.80955	0.373986	2.16465	0.0304142	0.288942	ENSMUSG00000109539	1.36624	1.25457	0.751776	0.734538	0.804705	0.941608	0.434487	0.557868	0.442865	119	88	37	53	41	90	36	30	35	93.0938	90.2894	52.3793	51.3225	54.8385	64.4882	28.4822	40.1174	31.371
Lpcat3	1716.69	-0.209248	0.0967196	-2.16345	0.0305069	0.289029	ENSMUSG00000004270	40.7953	37.7092	36.4517	45.0649	48.4734	43.5909	47.0033	44.2498	40.8399	1975	1347	1073	1908	1491	2377	2344	1476	1884	1612.91	1574.52	1473.92	1826.71	1917.17	1732.07	1787.49	1846.83	1678.59
C330007P06Rik	1754.84	0.29496	0.136429	2.16201	0.0306175	0.289029	ENSMUSG00000006423	24.7153	33.6503	27.3623	24.199	23.7848	25.5181	25.5029	22.4826	20.4692	2152	2351	1349	1750	1200	2450	2088	1215	1623	1682.37	2419.09	1904.43	1689.04	1619.16	1745.86	1670.07	1615.07	1448.49
Hps5	834.573	0.354749	0.163935	2.16396	0.0304671	0.289029	ENSMUSG00000014418	9.96086	13.9964	11.9282	7.82801	9.54102	10.994	9.76925	8.45899	10.3393	996	982	653	696	558	1237	970	608	947	790.592	1173.33	968.069	637.097	757.362	877.054	745.963	708.566	853.12
Ctdnep1	922.968	0.336973	0.155812	2.16269	0.0305653	0.289029	ENSMUSG00000018559	31.1035	36.2382	37.5166	22.3033	28.5714	26.3013	27.9045	30.1653	32.6647	1226	1063	839	704	651	1096	930	727	1161	928.511	1142.6	1145.19	682.724	853.027	789.17	801.406	950.369	1013.72
Map1s	2460.14	-0.323792	0.149831	-2.16105	0.0306913	0.289029	ENSMUSG00000019261	45.1131	50.4917	41.7867	48.5731	73.3929	62.0725	59.7544	47.8032	57.6676	2800	2410	1400	2225	2357	3909	3034	1772	2824	2019.29	2387.07	1912.54	2229.42	3285.52	2792.62	2573.16	2258.19	2683.43
Guk1	3219.07	-0.395063	0.182741	-2.16188	0.0306277	0.289029	ENSMUSG00000020444	147.377	121.096	149.567	199.074	226.62	117.553	189.739	193.333	183.705	3549	2305	2068	3904	3110	3072	4324	2812	3959	2746.34	2383.42	2849.94	3803.98	4223.54	2201.78	3401.58	3802.22	3558.84
Ndufa5	4588.34	-0.289557	0.133875	-2.1629	0.0305488	0.289029	ENSMUSG00000023089	439.719	344.465	468.53	573.964	535.792	431.568	508.26	518.157	520.642	5299	3373	3109	5428	3814	5840	5528	3951	5633	4110.16	3400.75	4478.13	5501.3	5008.79	4054.59	4570.55	5111.53	5059.22
Htra4	57.7467	0.92268	0.426994	2.16087	0.0307052	0.289029	ENSMUSG00000037406	1.43548	2.92495	1.44362	0.590363	1.09085	1.27663	0.639148	0.977805	1.63148	72	119	45	27	35	77	34	33	81	60.4577	130.286	62.2093	25.7097	45.9758	54.0554	26.2791	43.4879	71.2595
Pnrc1	1213.76	0.387586	0.179344	2.16113	0.030685	0.289029	ENSMUSG00000040128	40.8923	56.9882	37.5126	32.288	29.8433	36.3947	32.4936	39.2984	39.4119	1590	1819	855	1036	696	1585	1235	953	1430	1266.57	1864.32	1188.07	1025.48	924.461	1133.03	968.251	1284.61	1269.05
Treml2	254.497	0.769472	0.355833	2.16245	0.0305834	0.289029	ENSMUSG00000071068	4.17413	7.99298	3.85668	1.51914	2.85526	5.69177	3.62199	2.80872	2.71845	362	506	191	122	129	488	211	150	209	265.804	537.592	251.123	99.1959	181.842	364.299	221.893	188.761	179.962
Tut1	3557.26	-0.312433	0.144596	-2.16073	0.0307164	0.289029	ENSMUSG00000071645	60.7119	59.7571	50.6139	75.9082	91.3336	67.8879	74.4717	59.1948	62.2573	4060	3153	1932	4302	3575	4960	4708	2426	3804	3176.83	3302.61	2708.11	4072.94	4779.74	3570.49	3748.97	3268.96	3386.67
Ccdc61	357.555	-0.475816	0.220081	-2.162	0.0306183	0.289029	ENSMUSG00000074358	9.36729	9.14939	9.18196	10.158	16.73	9.31427	17.8629	12.6559	11.6713	336	248	223	357	401	392	514	305	452	280.135	288.997	280.779	311.501	500.382	279.974	513.934	399.44	362.855
Samd1	627.441	-0.434782	0.200964	-2.16348	0.0305041	0.289029	ENSMUSG00000079003	10.8292	9.85796	13.0169	14.0243	17.5588	11.9258	22.0539	11.8113	15.0734	621	454	423	648	541	743	1192	416	783	478.377	459.948	587.973	635.263	775.75	529.515	937.263	550.656	692.225
Gm49373	94.6072	-0.686813	0.317727	-2.16164	0.0306458	0.289029	ENSMUSG00000111692	1.91333	0.965131	2.37479	2.71665	2.58824	3.29042	3.96019	2.05678	2.37843	93	38	65	109	73	175	183	61	104	72.6321	39.0882	91.4599	105.91	97.805	125.193	143.986	82.093	93.2981
Glmn	2001.88	-0.416417	0.192764	-2.16025	0.0307535	0.289185	ENSMUSG00000029276	56.1326	35.413	45.1103	74.266	67.054	44.4973	77.2207	53.3561	52.2734	2474	1310	1203	2702	1735	2152	3311	1448	2185	1973.2	1314.75	1621.08	2676.86	2357.53	1572.14	2611.68	1979.46	1910.22
Pfas	3871.3	-0.331938	0.153696	-2.1597	0.0307955	0.28931	ENSMUSG00000020899	30.0571	26.8181	29.961	39.098	48.5375	31.5319	39.0258	33.9019	29.3321	4402	2963	2428	4641	4049	4924	5220	2984	3771	3344.06	3151.39	3408.47	4460.47	5400.79	3526.07	4177.14	3980.69	3392.59
Ppwd1	310.59	0.421855	0.195344	2.15955	0.0308078	0.28931	ENSMUSG00000021713	7.42016	7.29434	7.93843	5.75392	4.45742	7.85277	5.98244	4.87615	5.20274	446	382	274	286	164	523	361	180	300	358.838	372.574	392.544	285.325	215.583	381.694	278.328	248.864	261.561
Zfp608	327.441	0.415386	0.19238	2.15919	0.0308354	0.289377	ENSMUSG00000052713	2.91807	2.98219	3.74819	1.97206	1.96147	2.37587	2.76102	2.89369	2.63197	454	355	313	246	186	407	411	260	359	347.893	375.519	456.927	241.083	233.875	284.699	316.679	364.089	326.206
Fdft1	2510.59	-0.233221	0.108045	-2.15855	0.0308854	0.289653	ENSMUSG00000021273	37.9472	31.7115	33.417	42.6542	40.2877	45.6734	40.3713	39.5365	36.4077	3061	2155	1513	2836	1942	4124	3118	1990	2697	2422.39	2138	2181.3	2791.72	2572.4	2930.44	2479.16	2663.94	2415.98
Ankrd24	34.2345	0.819459	0.379686	2.15826	0.0309079	0.289671	ENSMUSG00000054708	1.6182	1.30546	2.10015	1.07318	1.28627	0.910657	0.967644	0.630897	0.918144	54	29	30	37	20	48	39	25	24	45.3345	38.6283	60.1618	30.8295	36.0395	25.6428	26.0802	18.6535	26.7403
Plod3	620.195	0.392067	0.181702	2.15775	0.0309474	0.289849	ENSMUSG00000004846	11.8953	12.9178	14.0074	12.1153	11.4611	7.36439	8.97779	9.58218	10.3157	827	644	469	661	498	635	587	498	748	659.987	756.807	794.18	689.231	635.261	410.74	478.877	561.461	595.21
Pstpip1	173.005	0.431455	0.199983	2.15746	0.0309696	0.289865	ENSMUSG00000032322	5.47172	5.67161	5.56221	3.13637	4.54568	4.81147	3.88139	4.42505	4.27899	225	215	150	129	120	262	154	134	196	199.991	218.948	207.879	117.547	166.165	176.758	136.482	170.691	162.588
Dop1a	547.121	0.418453	0.194104	2.15581	0.0310984	0.290397	ENSMUSG00000034973	11.6845	11.2579	10.6787	9.44307	6.98582	8.00301	8.10377	6.65041	11.6185	937	621	415	657	350	534	535	338	666	668.015	679.905	624.523	553.911	399.333	460.01	445.952	401.625	690.82
Lsm1	1864.17	-0.332907	0.154472	-2.15513	0.0311519	0.290397	ENSMUSG00000037296	37.4716	25.4646	33.5681	45.9061	43.2055	32.9441	44.9152	42.4033	35.9447	2273	1327	1189	2257	1520	2227	2678	1602	2046	1809.58	1298.86	1657.6	2273.24	2086.74	1599.07	2086.75	2161.14	1804.57
Kif16b	1117.76	0.425992	0.197644	2.15535	0.0311341	0.290397	ENSMUSG00000038844	17.4845	8.46494	16.0821	10.3209	10.4661	10.2408	12.7063	10.3487	8.93172	1858	876	882	1085	833	1138	1507	860	1123	1649.32	843.381	1551.21	998.317	987.392	970.961	1153.11	1030.25	875.891
Rfx3	80.7408	0.670996	0.311205	2.15612	0.0310743	0.290397	ENSMUSG00000040929	0.726812	0.567771	0.851543	0.43271	0.647493	0.499026	0.449528	0.236659	0.459028	139	89	67	67	60	95	97	30	97	106.708	88.0429	127.837	65.1432	95.0739	73.6396	63.4937	36.6693	70.0606
Znhit6	3145.32	-0.248021	0.115079	-2.15522	0.0311443	0.290397	ENSMUSG00000074182	128.03	103.601	133.367	159.02	153.786	143.978	150.836	141.717	126.559	3716	2388	2222	3742	2473	4554	4182	2441	3364	2872.63	2455.17	3059.79	3658.64	3450.94	3246.99	3255.92	3355.8	2952.04
Spc24	54.2574	0.955783	0.443542	2.15489	0.0311706	0.290397	ENSMUSG00000074476	3.08318	2.9199	3.84497	0.480608	1.91799	1.44593	2.01966	2.79067	1.70107	98	76	72	13	37	47	49	41	50	73.0157	73.0353	93.1077	11.6709	45.4271	34.4176	46.0146	69.748	41.8795
Gm42664	78.4883	0.763465	0.35406	2.15631	0.0310591	0.290397	ENSMUSG00000106099	1.38658	1.95757	1.42593	1.1304	0.547086	1.19876	0.635267	1.32489	0.836002	117	133	68	79	27	111	51	69	64	91.5231	136.474	96.241	76.5101	36.1156	79.5304	40.3407	92.2937	57.3661
Gm45713	26.9743	-1.18632	0.550621	-2.15452	0.0311994	0.290473	ENSMUSG00000089989	0.519372	0.849087	0.144411	0.819421	1.27867	1.19403	0.741447	1.50327	1.58981	18	24	3	24	26	46	25	32	51	14.0382	24.7393	4.20009	23.3854	34.8833	32.8639	19.5806	43.2937	45.7845
Crybg3	837.162	-0.393578	0.182715	-2.15405	0.0312359	0.290622	ENSMUSG00000022723	6.63378	8.18122	6.9388	9.19312	12.7209	9.82992	11.3827	7.62837	7.43394	805	793	490	906	873	1256	1204	558	808	615.933	802.112	658.949	875.468	1182.06	917.709	1017.18	747.313	717.735
Sos1	1086.57	0.316327	0.146874	2.15374	0.0312608	0.290662	ENSMUSG00000024241	6.72147	6.63868	7.63631	5.74665	4.32423	5.99223	5.94662	5.66338	6.35926	1505	1163	969	1079	549	1450	1276	787	1299	1171.85	1222.47	1361.35	1027.36	753.999	1050.06	997.424	1042.06	1152.6
Gm44746	13.3652	1.4601	0.678111	2.15319	0.0313037	0.290869	ENSMUSG00000108341	0.407275	1.37416	0.93361	0.344148	0.269757	0.456861	0.130642	0.2582	0.520793	13	35	17	9	5	16	4	5	15	10.1328	36.1097	23.751	8.77978	6.71221	11.4245	3.12696	6.77958	13.47
Gm38156	4.09705	4.36242	2.02662	2.15256	0.0313531	0.291136	ENSMUSG00000103360	0	0.478867	0.246775	0	0	0.063722	0	0	0	0	22	8	0	0	4	0	0	0	0	22.6839	11.317	0	0	2.87249	0	0	0
Pdhx	1122.99	-0.312888	0.145394	-2.152	0.0313975	0.291165	ENSMUSG00000010914	20.8576	19.8804	16.8654	22.5376	30.1074	25.1722	24.9947	22.6451	19.8071	1302	995	605	1157	1103	1718	1504	883	1128	1022.54	1029.41	845.455	1132.98	1476.19	1240.38	1178.87	1171.65	1009.48
Taf6	2342.3	-0.412993	0.191909	-2.15203	0.0313953	0.291165	ENSMUSG00000036980	65.7696	43.7226	56.4456	77.2964	97.2288	50.205	83.8926	71.6583	66.1693	2901	1536	1480	2791	2376	2326	3366	1883	2629	2230.45	1565.91	1956.61	2687.64	3296.64	1710.74	2736.36	2564.16	2332.17
Plrg1	2449.69	-0.281253	0.13078	-2.15058	0.0315092	0.291372	ENSMUSG00000027998	68.8929	46.9023	62.0935	79.0785	76.7794	65.9608	77.1587	69.411	67.9571	3116	1687	1581	2961	2029	3272	3347	1925	2792	2433.22	1749.64	2242.49	2863.95	2712.1	2341.58	2621.76	2587.27	2495.19
[truncated: 12,681 more rows]
