# Supplementary material for: Tlr7-biallelism defines a hyperfunctional state of female B lymphocytes
Source: Research Square preprint supplement (doi:10.21203/rs.3.rs-8306714/v1), 2025-12-10
Supplement: Supplementary file 3 [file c65cba9335e756bbceb5536b.xlsx]

## Sheet: BiA_vs_MonoA.FC1.padj0.05
Supplementary Table 1: Differentially expressed genes (DEGs) between Tlr7 mono and biallelic CD19+ splenic B cells
chromosome_name	start_position	end_position	strand	ensembl_gene_id	mgi_symbol	baseMean	log2FoldChange	lfcSE	stat	pvalue	padj	gene_biotype	description	BiA1.TPM	BiA2.TPM	BiA3.TPM	BiA4.TPM	MonoA1.TPM	MonoA2.TPM	MonoA3.TPM	MonoA4.TPM	MonoA5.TPM	MonoA6.TPM	MonoA7.TPM	MonoA8.TPM	BiA1.raw_counts	BiA2.raw_counts	BiA3.raw_counts	BiA4.raw_counts	MonoA1.raw_counts	MonoA2.raw_counts	MonoA3.raw_counts	MonoA4.raw_counts	MonoA5.raw_counts	MonoA6.raw_counts	MonoA7.raw_counts	MonoA8.raw_counts	BiA1.norm.counts	BiA2.norm.counts	BiA3.norm.counts	BiA4.norm.counts	MonoA1.norm.counts	MonoA2.norm.counts	MonoA3.norm.counts	MonoA4.norm.counts	MonoA5.norm.counts	MonoA6.norm.counts	MonoA7.norm.counts	MonoA8.norm.counts
6	68026967	68027440	1	ENSMUSG00000094872	Igkv9-120	375.323	2.97142	0.239839	8.21976	2.03903e-16	2.59568e-12	IG V gene	immunoglobulin kappa chain variable 9-120	489.812	459.474	469.014	396.697	49.2938	73.1196	50.3079	76.768	120.181	128.632	79.0022	93.5645	1212	993	812	700	79	92	64	87	155	163	113	149	1204.2	884.453	765.778	733.965	71.2829	101.996	70.6831	93.0283	164.543	174.523	120.835	118.585
6	67890557	67891036	1	ENSMUSG00000095737	Igkv11-125	97.8603	5.04492	0.52598	7.69024	1.46855e-14	9.34734e-11	IG V gene	immunoglobulin kappa variable 11-125	74.361	233.743	257.486	31.7164	5.09943	10.3321	4.01934	0	6.20287	7.11372	9.09993	6.39966	184	505	446	56	8	13	5	0	8	9	13	10	182.026	447.853	418.794	58.4634	7.30613	14.3502	5.58658	0	8.45581	9.59458	13.8413	8.05237
17	57510970	57535136	-1	ENSMUSG00000024164	C3	18.233	6.76566	0.77254	7.46325	8.44111e-14	3.58185e-10	protein coding	complement component 3	0.908641	1.55238	1.438	1.92321	0	0.026649	0.026457	0	0.024763	0.051328	0	0	16	38	80	31	0	1	1	0	1	2	0	0	43.2222	57.7991	45.4499	68.8898	0	0.719231	0.714598	0	0.655973	1.34526	0	0
7	19430034	19433113	-1	ENSMUSG00000002985	Apoe	3448.05	2.3945	0.191505	7.28178	3.29443e-13	1.04845e-09	protein coding	apolipoprotein E	647.726	701.478	740.461	794.998	213.33	126.078	152.212	169.726	151.753	253.638	248.622	243.455	8487	7994	6780	7278	1793	822	1050	1022	1151	1631	1843	2153	8488.06	7195.18	6447.31	7845.05	1636.24	937.425	1132.59	1091.56	1107.47	1831.36	2024.45	1639.89
12	114104312	114104742	-1	ENSMUSG00000096459	Ighv9-3	547.162	3.12477	0.318025	6.68114	2.37084e-11	6.03617e-08	IG V gene	immunoglobulin heavy variable V9-3	542.672	1004.55	634.564	592.292	82.2784	87.5571	45.4195	68.987	110.524	224.053	121.142	166.602	1328	2147	1087	1034	130	109	57	77	141	280	171	262	1319.84	1912.2	1025.37	1084.33	117.31	120.814	62.9342	82.3369	149.685	299.814	182.848	208.47
6	68713281	68713764	-1	ENSMUSG00000098814	Igkv19-93	965.018	3.49098	0.384124	6.48484	8.88282e-11	1.88464e-07	IG V gene	immunoglobulin kappa chain variable 19-93	813.722	810.609	2758.87	679.093	111.168	129.033	81.8909	115.107	213.835	248.093	139.462	176.953	2126	1847	5036	1265	187	171	109	137	291	331	210	296	2109.31	1644.7	4751.78	1325.58	168.664	189.778	120.533	146.436	308.688	354.34	224.631	235.778
11	83463745	83469462	-1	ENSMUSG00000019122	Ccl9	19.5753	7.29826	0.983896	6.40135	1.54012e-10	2.80082e-07	protein coding	chemokine (C-C motif) ligand 9	2.23933	0.446964	8.71743	3.58695	0	0.09377	0.046554	0	0	0	0	0.036557	18	17	47	24	0	2	1	0	0	0	0	1	47.0467	7.3501	121.691	56.7478	0	1.11777	0.555358	0	0	0	0	0.394789
12	115171715	115172211	-1	ENSMUSG00000095589	Ighv1-55	2162.65	4.38423	0.538306	6.28682	3.2403e-10	5.15613e-07	IG V gene	immunoglobulin heavy variable 1-55	2161.45	799.272	4856.16	1504.82	64.1741	95.4298	86.5041	96.4281	257.164	112.592	306.24	195.85	7260	2327	11409	3596	138	161	146	147	448	192	588	418	7162.96	2073.17	10692.7	3754.79	124.475	179.747	162.407	156.878	474.633	205.771	630.479	333.877
6	70094045	70094604	-1	ENSMUSG00000076577	Igkv8-30	294.342	3.33585	0.378844	6.16572	7.01618e-10	9.924e-07	IG V gene	immunoglobulin kappa chain variable 8-30	386.44	193.414	446.689	363.24	15.6418	16.1868	35.167	47.4725	58.7074	64.3781	69.9088	89.5517	1037	452	839	695	27	22	48	58	82	88	108	154	1028.14	402.564	789.878	728.093	24.3578	24.4351	53.1267	61.9862	86.9842	94.2292	115.572	122.741
11	83478708	83483913	-1	ENSMUSG00000018927	Ccl6	18.5822	5.74465	0.774664	6.12478	9.08109e-10	1.05093e-06	protein coding	chemokine (C-C motif) ligand 6	1.43473	5.01948	6.00154	6.81336	0	0.532933	0	0	0	0	0.27636	0.331533	24	84	83	95	0	1	0	0	0	0	3	4	21.15	57.9174	58.7844	75.6335	0	4.45752	0	0	0	0	2.53143	2.51215
11	117700494	117730730	1	ENSMUSG00000093485	Gm20708	27.2189	-7.87571	1.1218	-6.12917	8.83364e-10	1.05093e-06	protein coding	predicted gene 20708	0	0	0	0	0.708883	5.55145	2.9769	2.53087	3.38712	2.59259	3.0028	3.38608	0	0	0	0	11	67	36	28	44	32	42	52	0	0	0	0	9.88592	76.9343	41.0864	29.9435	46.2857	34.4596	45.8156	42.2153
6	48810752	48818430	-1	ENSMUSG00000029810	Tmem176b	127.494	3.79678	0.463585	6.03294	1.61002e-09	1.57658e-06	protein coding	transmembrane protein 176B	52.7403	31.2886	20.6236	21.7187	1.28432	2.61773	3.44846	1.09468	8.03312	4.85689	2.14202	4.31677	752	313	213	219	9	15	16	8	53	36	13	36	657.499	305.315	170.835	203.891	9.37139	18.5164	24.4108	6.69758	55.7715	33.3619	16.593	27.6623
7	126731404	126736995	-1	ENSMUSG00000051457	Spn	776.52	2.60732	0.266063	6.04113	1.53037e-09	1.57658e-06	protein coding	sialophorin	38.0268	48.3559	36.9224	41.0475	7.56772	6.53472	7.79507	5.58644	11.9128	19.0132	7.8708	11.237	2089	2307	1438	1597	268	176	206	125	345	530	243	387	2031.77	2022.3	1310.79	1651.52	236.662	198.103	236.489	146.487	354.465	559.732	261.308	308.612
14	79526196	79539085	-1	ENSMUSG00000022018	Rgcc	106.316	3.69492	0.456636	5.90168	3.59816e-09	3.27176e-06	protein coding	regulator of cell cycle	50.6422	19.5109	26.3678	23.2283	1.96268	0.917093	2.36968	3.57173	9.31779	3.02614	3.02918	4.01761	572	188	209	186	14	5	13	18	54	17	19	28	554.6	167.246	191.867	191.556	12.5804	5.6985	14.7354	19.1967	56.8272	18.2598	20.613	22.6159
12	113895573	113896002	-1	ENSMUSG00000094509	Ighv14-1	75.2358	4.05293	0.519801	5.87327	4.27278e-09	3.43352e-06	IG V gene	immunoglobulin heavy variable 14-1	87.1237	65.0592	208.755	72.1524	3.16985	5.62294	0.799579	15.4467	6.27086	23.1743	12.7371	5.72874	213	139	358	126	5	7	1	17	8	29	18	9	211.691	123.799	337.701	132.133	4.51194	7.75871	1.10411	18.1783	8.49274	31.0521	19.2471	7.16118
19	3963491	3979808	-1	ENSMUSG00000024885	Aldh3b1	256.915	2.48689	0.253234	5.87162	4.31551e-09	3.43352e-06	protein coding	aldehyde dehydrogenase 3 family, member B1	31.9059	32.3356	19.3225	21.031	5.67245	6.25892	4.24502	6.16174	7.33395	9.65299	7.61327	8.15937	867	754	373	409	98	82	56	75	103	131	115	137	844.155	669.644	339.681	419.013	87.8415	93.9572	63.7728	80.0081	108.06	140.719	125.162	110.965
3	148521219	148696191	-1	ENSMUSG00000028184	Adgrl2	181.391	3.3253	0.401911	5.78561	7.22507e-09	5.41031e-06	protein coding	adhesion G protein-coupled receptor L2	10.2009	11.0189	6.89759	7.92489	1.31407	1.39799	0.796842	0.34467	1.40948	3.21367	1.08355	0.911659	701	627	283	342	54	39	22	12	45	100	33	43	629.764	532.462	282.941	368.422	47.4828	48.9693	27.933	10.443	48.4589	109.316	41.566	28.9302
12	114547189	114547622	-1	ENSMUSG00000094694	Ighv1-9	1635.06	4.23599	0.57432	5.63447	1.75602e-08	1.2419e-05	IG V gene	immunoglobulin heavy variable V1-9	2426.73	911.964	2482.36	3325.37	72.2725	74.7047	99.1478	77.0504	476.585	163.018	251.262	163.587	5938	1949	4252	5807	114	93	124	86	608	204	355	257	5901.41	1735.88	4011.02	6089.57	102.869	103.077	136.905	91.9578	645.428	218.429	379.672	204.485
3	115903598	115923337	-1	ENSMUSG00000027962	Vcam1	18.0063	4.75195	0.667645	5.61968	1.91307e-08	1.28176e-05	protein coding	vascular cell adhesion molecule 1	1.11158	0.916767	2.97656	1.48579	0.030437	0.191753	0.056024	0.109032	0.052549	0.467015	0.034878	0	57	42	75	55	1	5	1	3	1	2	1	0	44.1034	28.4709	78.4702	44.3918	0.706815	4.31672	1.26215	2.12308	1.16109	10.2095	0.859873	0
7	113365235	113642605	1	ENSMUSG00000038156	Spon1	436.394	4.70319	0.662307	5.59135	2.25315e-08	1.36584e-05	protein coding	spondin 1, (f-spondin) extracellular matrix protein	26.3598	14.8177	10.5433	13.2932	0.677062	0.220938	0.593061	0.103866	1.42512	2.04169	0.921303	1.58079	2498	1187	702	883	39	9	24	4	68	95	48	91	2332.27	1026.19	619.829	885.683	35.0626	11.0915	29.7949	4.51017	70.2204	99.5331	50.6511	71.8937
12	8821323	8843715	1	ENSMUSG00000020592	Sdc1	522.519	3.46182	0.440134	5.59335	2.22735e-08	1.36584e-05	protein coding	syndecan 1	67.3894	39.2616	33.0975	32.3003	2.08266	4.24191	4.49548	4.30335	9.52318	10.6602	4.70467	7.39396	2809	1425	960	976	50	42	66	90	176	226	122	162	2476.45	1129.32	808.148	893.832	44.7954	88.446	93.8034	77.611	194.892	215.845	107.428	139.667
12	114709893	114710326	-1	ENSMUSG00000094561	Ighv1-22	227.756	2.86327	0.333767	5.58254	2.37025e-08	1.37151e-05	IG V gene	immunoglobulin heavy variable 1-22	355.198	306.468	232.932	175.268	27.2607	37.754	31.9832	42.1089	54.87	88.7011	64.393	90.3867	869	655	399	306	43	47	40	47	70	111	91	142	863.659	583.368	376.376	320.894	38.8027	52.0942	44.1644	50.2576	74.3115	118.855	97.305	112.987
12	115883899	115884332	-1	ENSMUSG00000094689	Ighv1-81	325.876	3.01135	0.361323	5.56664	2.59703e-08	1.4374e-05	IG V gene	immunoglobulin heavy variable 1-81	439.731	502.982	285.528	351.98	39.9401	54.6228	34.3819	47.4845	53.7976	131.054	132.324	73.8371	1076	1075	489	615	63	68	43	53	69	164	187	116	1069.39	957.436	461.273	644.933	56.8504	75.3703	47.4767	56.6735	73.2499	175.605	199.956	92.2996
1	161810022	162305603	-1	ENSMUSG00000040265	Dnm3	88.3023	3.39631	0.434451	5.51572	3.47353e-08	1.84242e-05	protein coding	dynamin 3	5.54959	9.88424	4.96514	7.43649	1.08512	0.913184	0.622732	0.26952	1.38209	1.85079	0.103413	1.39777	234	370	143	223	41	25	18	9	22	24	1	32	222.776	310.571	132.433	224.796	25.4954	20.7991	14.1943	5.30977	30.8971	40.9359	2.57947	28.8417
4	136607440	136613498	-1	ENSMUSG00000036905	C1qb	9.71297	7.26515	1.14239	5.48427	4.15186e-08	2.03282e-05	protein coding	complement component 1, q subcomponent, beta polypeptide	5.41894	1.84144	1.42153	1.10662	0	0	0	0	0	0	0	0	76	22	14	11	0	0	0	0	0	0	0	0	73.1186	19.4483	12.7447	11.2441	0	0	0	0	0	0	0	0
12	114672268	114672755	-1	ENSMUSG00000096410	Ighv1-19	237.766	3.22657	0.405942	5.48494	4.13619e-08	2.03282e-05	IG V gene	immunoglobulin heavy variable V1-19	208.676	357.503	315.612	58.1775	26.2346	37.7964	24.0627	18.5131	35.9978	35.0293	71.241	30.3164	670	995	709	133	54	61	39	27	60	57	131	61	660.748	886.834	664.13	138.757	48.6427	67.9351	43.2827	28.7822	63.4906	60.991	140.231	49.3651
11	109464157	109502793	-1	ENSMUSG00000041895	Wipi1	62.6568	3.7378	0.504406	5.42776	5.70653e-08	2.69052e-05	protein coding	WD repeat domain, phosphoinositide interacting 1	11.065	4.91211	4.0429	4.07776	0.196506	0.462359	0.723961	0.590639	0.785212	1.5408	0.18168	1.17328	365	133	104	102	2	8	11	9	15	23	5	23	350.338	121.734	85.0522	97.2229	3.64156	8.30604	13.0153	9.17776	13.8451	26.8795	3.57429	19.0948
1	151446937	151597690	1	ENSMUSG00000026483	Niban1	90.4914	3.96074	0.568882	5.20449	1.9453e-07	8.84418e-05	protein coding	niban apoptosis regulator 1	7.45932	7.14176	3.4169	7.13732	0.524444	0.178021	1.29851	0.044607	1.2492	0.671585	0.482073	0.307315	306	205	123	160	20	5	25	2	41	28	4	11	346.382	259.58	105.426	249.577	14.2539	4.69035	34.2379	1.01658	32.3045	17.183	13.9097	7.33533
6	70549617	70550214	1	ENSMUSG00000076596	Igkv3-10	181.281	3.35256	0.453257	5.19035	2.09904e-07	9.21406e-05	IG V gene	immunoglobulin kappa variable 3-10	282.453	162.421	356.407	93.6502	16.3705	24.3579	11.4057	9.0524	60.2109	37.4537	36.3071	55.6963	722	362	638	171	27	32	15	11	80	49	54	91	716.693	322.419	601.221	179.249	24.3569	35.5019	16.581	11.7622	84.8936	52.4624	57.7598	72.4795
12	115298702	115299134	-1	ENSMUSG00000095197	Ighv1-59	68.4536	2.64525	0.319109	5.15576	2.52601e-07	0.000107187	IG V gene	immunoglobulin heavy variable V1-59	62.9916	135.373	59.9987	62.8918	20.3638	16.5155	18.5572	20.2085	20.7516	18.3204	6.74213	26.7882	154	289	103	110	32	21	23	23	26	23	10	42	153.053	257.394	97.1598	115.354	28.8764	23.2761	25.3945	24.5941	27.6014	24.6276	10.6929	33.4188
15	10177324	10349266	1	ENSMUSG00000005268	Prlr	67.0343	3.93088	0.570361	5.13864	2.76736e-07	0.000110808	protein coding	prolactin receptor	6.26331	2.73971	1.52642	3.44681	0.092914	0.247308	0.305384	0.235247	0.480898	1.14077	0.117463	0.172251	261	125	109	108	1	7	12	5	36	34	8	7	371.609	127.232	60.1751	153.997	3.22657	8.32532	10.2881	6.84993	15.8895	37.2925	4.33046	5.19489
15	78810925	78814665	1	ENSMUSG00000068220	Lgals1	173.349	3.00202	0.389694	5.13741	2.78544e-07	0.000110808	protein coding	lectin, galactose binding, soluble 1	65.6323	77.0673	38.3741	40.9514	5.38356	5.48823	7.4195	4.75813	12.841	22.4112	12.0307	11.1725	617	619	253	273	32	25	34	20	62	105	63	65	599.276	550.794	232.812	281.573	28.7711	28.4329	38.4671	21.3219	65.2957	112.75	68.2576	52.4368
8	94905710	94906955	1	ENSMUSG00000031765	Mt1	47.8822	3.33519	0.456312	5.11754	3.09552e-07	0.000119412	protein coding	metallothionein 1	35.4356	17.5303	24.2519	20.1854	3.07254	1.12765	0.604629	3.12615	4.06892	5.45263	5.66889	5.33832	203	84	95	82	14	3	2	8	18	15	20	20	211.379	81.8505	96.1227	90.6717	10.7275	3.8166	2.04794	9.15193	13.5169	17.9213	21.0121	16.3684
1	171057141	171061934	-1	ENSMUSG00000058715	Fcer1g	62.9133	3.88996	0.567802	5.08972	3.58591e-07	0.000134261	protein coding	Fc receptor, IgE, high affinity I, gamma polypeptide	42.2516	33.6825	23.375	30.143	7.26886	3.05563	0.552479	0.301955	3.80351	5.68913	3.43786	1.30685	312	213	121	158	34	11	2	1	6	21	6	6	262.847	164.012	96.6208	141.208	26.467	10.7855	1.95156	0.921898	13.1771	19.5006	13.2892	4.17891
6	67586697	67587492	1	ENSMUSG00000096336	Igkv1-135	895.32	2.35755	0.270084	5.0264	4.99777e-07	0.000181776	IG V gene	immunoglobulin kappa variable 1-135	777.23	782.504	1067.73	612.318	148.583	163.544	121.772	145.589	351.18	315.005	231.868	321.813	2373	2076	2281	1331	291	251	188	202	557	489	406	626	2346.13	1848.9	2141.55	1391.93	262.513	279.675	208.73	215.68	590.347	523.916	434.946	499.523
2	148246386	148250108	-1	ENSMUSG00000074743	Thbd	68.3831	3.78548	0.556364	5.00657	5.54071e-07	0.00019063	protein coding	thrombomodulin	6.86788	3.3273	1.61407	3.53333	0.141178	0.29872	0.25952	0.080234	0.937613	0.539685	0.776661	0.3493	387	159	64	141	5	8	7	2	27	15	24	12	372.59	141.29	58.1822	144.346	4.48283	9.195	7.99435	2.13623	28.3274	16.132	26.1812	9.74059
12	114954728	114955200	-1	ENSMUSG00000076709	Ighv1-47	130.976	3.59435	0.517754	5.01077	5.42115e-07	0.00019063	IG V gene	immunoglobulin heavy variable 1-47	305.188	43.4974	64.1632	78.029	9.5692	12.1946	13.4211	12.0829	38.5521	12.7097	12.396	20.8013	945	117	139	172	19	19	21	17	62	20	22	41	934	104.197	130.474	179.825	17.1409	21.1753	23.3224	18.1481	65.7061	21.4316	23.5728	32.7227
7	44461680	44466082	-1	ENSMUSG00000038539	Atf5	35.7425	2.81774	0.368378	4.93444	8.03803e-07	0.000269274	protein coding	activating transcription factor 5	6.19463	4.8059	3.64995	3.45791	0.679538	1.28599	0.727883	0.738529	1.44392	0.993652	0.743734	0.93675	159	104	66	63	11	15	9	3	19	12	10	14	138.499	84.1037	54.222	58.2179	8.89247	16.3136	9.24055	8.1036	17.9783	12.2407	10.3323	10.7655
1	173723911	173740612	-1	ENSMUSG00000026536	Ifi211	114.31	3.47994	0.511442	4.84891	1.24139e-06	0.000405202	protein coding	interferon activated gene 211	19.6396	16.415	11.4724	10.223	0.824905	0.918487	0.781925	0.449958	3.81171	4.82076	1.43286	2.48087	495	352	203	183	13	11	9	5	49	60	20	38	477.612	312.902	185.107	187.691	11.6636	12.6099	10.2544	5.33805	51.4581	64.5029	21.7803	30.7979
12	115797570	115798038	-1	ENSMUSG00000096020	Ighv1-75	1175.26	4.53012	0.729279	4.84056	1.29473e-06	0.000412049	IG V gene	immunoglobulin heavy variable 1-75	2618.44	335.952	1557.83	1115.75	26.5499	35.427	39.7711	37.5439	266.297	144.081	46.7187	152.334	7211	806	3002	2189	47	49	56	47	382	202	74	268	7145.09	717.846	2824.15	2292.58	42.4033	54.4628	62.0221	50.2178	405.1	216.32	79.2135	213.666
6	125326325	125339447	1	ENSMUSG00000030341	Tnfrsf1a	6.21638	5.86439	1.00928	4.81968	1.43787e-06	0.000446442	protein coding	tumor necrosis factor receptor superfamily, member 1a	0.930098	0.717704	0.684058	0.633896	0	0	0	0	0.062709	0	0	0.052478	29	19	15	14	0	0	0	0	1	0	0	1	27.9134	16.8593	13.6407	14.3256	0	0	0	0	1.04806	0	0	0.809543
12	114251772	114252202	-1	ENSMUSG00000076672	Ighv3-6	481.652	3.31667	0.481707	4.80929	1.51467e-06	0.00045832	IG V gene	immunoglobulin heavy variable 3-6	725.971	477.972	622.247	633.399	38.2458	45.2247	55.4268	45.0449	133.194	195.245	54.7839	159.352	1766	1016	1060	1100	60	56	69	50	169	243	77	249	1755.45	904.87	999.989	1153.62	54.1421	62.0624	76.1749	53.4687	179.405	260.192	82.3335	198.111
2	31360219	31410684	1	ENSMUSG00000076441	Ass1	280.552	2.08009	0.224789	4.80492	1.54813e-06	0.00045832	protein coding	argininosuccinate synthetase 1	33.2625	34.8623	28.1014	28.3126	10.9278	7.39774	13.4544	6.34107	12.6124	12.1329	10.1502	11.8985	791	695	470	467	164	82	154	67	148	143	133	171	756.236	620.374	424.693	484.496	145.772	95.7668	173.775	70.8553	159.758	152.283	143.454	139.163
1	21066523	21149453	-1	ENSMUSG00000041779	Tram2	655.56	2.42292	0.297443	4.78384	1.71981e-06	0.000497573	protein coding	translocating chain-associating membrane protein 2	22.6331	18.5487	15.1051	17.9948	3.09456	2.84302	3.61112	4.53327	7.51412	9.75742	3.65842	6.0986	2282	1528	1072	1204	196	136	174	202	387	401	202	358	2134.68	1369.35	946.611	1278.06	170.831	152.142	193.392	209.837	394.679	507.068	214.404	295.664
12	115825487	115825975	-1	ENSMUSG00000096452	Ighv1-77	103.907	3.64729	0.554762	4.77194	1.82458e-06	0.000516154	IG V gene	immunoglobulin heavy variable 1-77	198.403	67.1888	101.069	25.7889	10.1568	3.08469	12.9008	11.6047	5.37433	26.3354	20.5746	5.84857	640	188	228	59	21	5	21	17	9	43	38	12	631.996	167.443	213.861	61.6388	18.9433	5.57712	23.3421	18.148	9.53712	46.078	40.7379	9.57959
7	24069688	24086115	1	ENSMUSG00000054342	Kcnn4	283.096	2.83685	0.386439	4.75328	2.00145e-06	0.000553879	protein coding	potassium intermediate/small conductance calcium-activated channel, subfamily N, member 4	33.424	31.5669	30.3972	26.7518	3.98559	2.47661	2.43254	3.76051	14.3941	9.26835	5.8011	7.74206	931	761	555	541	65	38	34	55	148	139	83	143	900.119	665.401	543.918	542.508	62.8221	37.8424	37.1969	49.7014	215.875	137.526	97.0735	107.171
2	68966144	69019674	1	ENSMUSG00000034738	Nostrin	9.5864	4.39067	0.716695	4.73099	2.23432e-06	0.000605168	protein coding	nitric oxide synthase trafficker	1.44589	1.97791	1.44509	1.26875	0.124171	0.321587	0.081279	0	0.152753	0	0	0.255461	37	43	26	23	2	1	1	0	2	0	0	4	30.6469	32.8148	20.3519	20.2507	1.54046	3.8675	0.978215	0	1.80309	0	0	2.78326
11	69555039	69556979	-1	ENSMUSG00000018774	Cd68	34.3432	2.93723	0.413191	4.68847	2.75261e-06	0.000730016	protein coding	CD68 antigen	6.9914	7.92591	4.45236	6.1445	1.7512	0.25562	1.01579	1.24114	1.91541	0.865899	0.776789	1.89717	114	110	51	71	18	2	8	9	16	7	7	19	110.233	97.8154	46.6441	72.9536	16.1608	2.28677	9.09404	9.60396	16.8184	7.5224	7.61028	15.3756
12	113790266	113790749	-1	ENSMUSG00000094134	Ighv5-15	36.4112	4.64321	0.783997	4.64697	3.36846e-06	0.000866992	IG V gene	immunoglobulin heavy variable 5-15	88.7395	74.1016	9.94802	11.3915	3.60432	2.42275	1.60773	0.900898	1.57627	2.27211	0	10.8722	229	167	18	21	6	3	2	1	2	3	0	18	222.048	145.329	16.571	21.5053	5.28874	3.4462	2.28861	1.10843	2.20068	3.1385	0	14.0103
5	37446442	37494238	-1	ENSMUSG00000029122	Evc	71.0738	3.23374	0.48092	4.64472	3.40531e-06	0.000866992	protein coding	EvC ciliary complex subunit 1	7.46349	4.3866	5.70064	4.94395	0.564616	0.614376	1.26638	0.104049	1.58068	1.44479	0.97495	0.397695	343	208	165	153	10	6	10	2	46	38	21	16	284.894	131.063	144.585	142.111	12.6146	13.3062	27.448	1.94921	33.6015	30.3869	23.1245	7.80314
6	48817853	48824005	1	ENSMUSG00000023367	Tmem176a	62.6846	3.97202	0.644075	4.61441	3.94221e-06	0.000984006	protein coding	transmembrane protein 176A	25.7976	15.2695	8.44486	3.54898	0.447611	1.25137	0.760784	0	2.3542	2.80644	1.68894	1.17844	357	159	112	59	6	7	6	0	21	21	8	9	373.542	173.059	81.2477	38.6969	3.7935	10.2808	6.255	0	18.9836	22.3902	15.1958	8.77096
13	95648240	95661735	-1	ENSMUSG00000021678	F2rl1	29.4884	3.54587	0.559357	4.55142	5.3284e-06	0.00130443	protein coding	coagulation factor II (thrombin) receptor-like 1	4.51006	1.80075	0.875826	1.63545	0.35274	0.207106	0.154238	0.500988	0.578484	0.149774	0.179542	0.282634	183	62	25	47	9	4	3	9	12	3	4	7	176.307	55.1001	22.7491	48.1435	8.0709	4.59368	3.42362	9.61161	12.5938	3.22601	4.36117	5.67926
12	115031180	115031622	-1	ENSMUSG00000102364	Ighv8-5	33.1871	3.75478	0.606556	4.54167	5.58104e-06	0.00131619	IG V gene	immunoglobulin heavy variable V8-5	50.8482	8.62116	89.7291	27.087	0.619444	2.32248	4.62442	7.04605	4.52736	2.30828	5.45274	10.4792	129	19	160	49	1	3	6	8	6	3	8	17	128.073	16.9229	150.793	51.3662	0.902134	3.32789	6.63135	8.55456	6.36736	3.21195	8.55663	13.5386
4	53440413	53622478	1	ENSMUSG00000028412	Slc44a1	428.749	2.45158	0.319619	4.54159	5.5832e-06	0.00131619	protein coding	solute carrier family 44, member 1	29.5956	22.3453	22.4506	21.9697	5.08786	3.15541	4.09788	3.31036	10.9359	9.20155	7.4611	8.1727	1452	932	716	749	179	78	91	81	280	253	175	248	1419.58	838.934	715.514	793.539	142.838	85.8751	111.608	77.9267	292.12	243.183	222.374	201.5
16	19017146	19019101	-1	ENSMUSG00000076937	Iglc2	3995.75	1.59709	0.13161	4.5368	5.71144e-06	0.00132194	IG C gene	immunoglobulin lambda constant 2	1547.66	1356.46	1754.49	1399.72	608.844	615.029	642.105	748.238	682.331	787.785	835.194	821.641	9463	7056	7421	6017	2389	1861	1951	2076	2163	2417	2840	3172	9250.69	6346.78	6968.3	6300.22	2130.11	2085.9	2179.36	2195.02	2271.38	2594.57	3102.09	2524.52
2	123931889	124509690	1	ENSMUSG00000027200	Sema6d	98.4195	3.55936	0.572294	4.47211	7.74517e-06	0.00176064	protein coding	sema domain, transmembrane domain (TM), and cytoplasmic domain, (semaphorin) 6D	5.80743	2.91885	2.12432	3.19127	0.474174	0.306346	0.121403	0.023706	0.972643	0.782792	0.614502	0.255181	491	232	144	211	29	12	4	1	44	37	24	15	492.566	193.777	119.718	203.824	23.5394	14.7425	5.84677	0.986756	45.9419	36.582	32.3857	11.1252
8	129085085	129229844	1	ENSMUSG00000025810	Nrp1	42.2022	3.81269	0.633025	4.44326	8.86079e-06	0.00197891	protein coding	neuropilin 1	4.73988	2.5635	1.1883	1.97738	0.153667	0.170438	0.089282	0	0.756394	0.371601	0.223006	0.513219	255	117	45	74	4	4	2	0	21	10	6	17	233.26	98.7451	38.8559	73.278	4.42619	4.75902	2.49484	0	20.7298	10.0761	6.81928	12.9824
17	56056984	56160662	1	ENSMUSG00000032915	Adgre4	8.80815	5.63228	1.04479	4.43371	9.26236e-06	0.00203293	protein coding	adhesion G protein-coupled receptor E4	1.15919	0.268871	0.621165	0.295164	0	0	0.079379	0.042952	0	0	0	0.031163	61	12	23	11	0	0	2	1	0	0	0	1	58.7135	10.6595	20.9049	11.2579	0	0	2.28292	1.06768	0	0	0	0.811334
2	155543597	155571395	-1	ENSMUSG00000038312	Edem2	629.274	2.35472	0.306718	4.41682	1.00165e-05	0.00216119	protein coding	ER degradation enhancer, mannosidase alpha-like 2	78.4967	50.728	39.2965	45.4139	9.97726	8.69938	11.721	12.6867	27.2671	20.9616	14.5601	20.1135	2568	1386	897	1042	200	128	169	167	427	335	256	388	2387.34	1207.6	794.101	1040.08	177.604	150.118	202.411	189.361	461.827	351.26	275.155	314.435
12	115459245	115459678	-1	ENSMUSG00000096672	Ighv1-63	45.5881	3.39667	0.543256	4.41168	1.02574e-05	0.00217628	IG V gene	immunoglobulin heavy variable V1-63	25.7463	25.74	156.524	52.1791	3.80381	12.0491	3.9979	5.37561	11.7579	14.384	1.41523	12.7305	63	55	268	91	6	15	5	6	15	18	2	20	62.6128	48.9851	252.804	95.4291	5.41433	16.6258	5.52055	6.41586	15.9239	19.2737	2.13857	15.9137
6	69877408	69877961	-1	ENSMUSG00000076569	Igkv5-39	3461.27	4.99521	0.910129	4.38972	1.13499e-05	0.00236859	IG V gene	immunoglobulin kappa variable 5-39	6085.53	4949.32	2913.34	6121.39	25.2735	25.4446	38.3964	43.9703	556.111	768.287	171.929	238.098	14558	10347	4880	10453	39	31	47	48	694	941	225	366	14410.7	9173.66	4584.01	10915.9	35.03	34.1879	51.629	51.1018	733.387	1002.81	252.985	289.821
15	78912650	78914704	1	ENSMUSG00000096210	H1f0	132.154	2.80127	0.410757	4.38525	1.15853e-05	0.00237872	protein coding	H1.0 linker histone	16.9163	13.4265	9.71826	12.4182	1.07542	2.76646	1.90202	0.915982	5.48996	4.5185	1.96857	3.70791	500	337	202	260	20	39	27	12	83	66	32	67	482.157	299.54	184.047	266.534	17.9406	44.739	30.7823	12.8129	87.1418	70.9605	34.8644	54.3236
8	107329983	107396878	1	ENSMUSG00000000303	Cdh1	8.53889	5.20645	0.96103	4.37703	1.2031e-05	0.00243103	protein coding	cadherin 1	0.827113	0.43552	0.251849	0.291996	0.066284	0.031097	0.030875	0	0	0	0	0.024238	56	25	12	14	2	1	1	0	0	0	0	1	51.6256	21.2774	10.4448	13.7243	2.42153	1.1013	1.09423	0	0	0	0	0.777645
5	37495843	37582399	1	ENSMUSG00000050248	Evc2	26.8837	3.27017	0.520297	4.36323	1.28155e-05	0.00254908	protein coding	EvC ciliary complex subunit 2	1.84913	2.03534	2.48247	1.62386	0.076673	0.650638	0.704398	0.108965	0.282892	0.195418	0.480744	0.158114	93	98	70	50	3	16	3	2	9	6	7	6	76.2133	65.6614	67.9835	50.3991	1.84963	15.2153	16.4848	2.2041	6.4932	4.4378	12.3119	3.34974
16	11131676	11137938	1	ENSMUSG00000022496	Tnfrsf17	37.2588	4.55798	0.816366	4.35831	1.31072e-05	0.002567	protein coding	tumor necrosis factor receptor superfamily, member 17	21.5732	8.7424	7.54191	14.1879	0	0.428347	0	0	1.61577	2.08174	0.186282	2.51501	208	72	51	97	0	2	0	0	8	10	1	15	201.748	63.9935	46.8635	99.9139	0	2.27284	0	0	8.41494	10.7266	1.08247	12.0896
9	14659616	14663689	-1	ENSMUSG00000049307	Fut4	27.9459	4.09135	0.710899	4.34851	1.37066e-05	0.00260426	protein coding	fucosyltransferase 4	2.87156	0.875181	1.05454	1.02512	0.02567	0.271647	0	0.182378	0.315708	0.163564	0	0.132341	178	46	46	45	1	8	0	5	10	5	0	5	171.293	40.8629	41.7966	46.0477	0.896251	9.19403	0	5.33917	10.4878	5.37589	0	4.05782
10	11219148	11335388	1	ENSMUSG00000055493	Epm2a	18.7698	-4.35629	0.771779	-4.34878	1.369e-05	0.00260426	protein coding	epilepsy, progressive myoclonic epilepsy, type 2 gene alpha	0.020265	0.310586	0.201613	0	4.49227	0.681849	5.72205	1.52847	9.77563	4.99697	2.52533	3.97662	1	13	7	0	25	16	14	7	23	10	4	14	0.237445	2.84844	1.56961	0	30.8076	4.53297	38.069	8.78923	63.7875	32.26	18.3858	23.9501
17	52052557	52055712	-1	ENSMUSG00000102973	E430014B02Rik	119.738	-1.93789	0.216077	-4.34053	1.42136e-05	0.00266088	TEC	RIKEN cDNA E430014B02 gene	0.63503	1.17281	1.59455	1.37487	5.72408	5.87464	6.23081	9.47057	6.29478	5.06194	4.20477	8.08503	30	47	53	46	170	132	141	198	152	118	109	233	28.8928	41.7671	48.205	47.1053	152.433	151.655	160.97	211.471	159.497	126.898	118.874	189.084
1	130947582	130952711	1	ENSMUSG00000016529	Il10	21.4597	4.1017	0.719978	4.30805	1.64701e-05	0.00303861	protein coding	interleukin 10	5.79851	2.67261	3.07457	4.89377	0.090209	0	0.117807	0	0.554981	0.458896	0.308836	1.29678	102	40	38	61	1	0	1	0	5	4	3	14	98.5063	35.538	34.7049	62.6042	0.89697	0	1.13638	0	5.2505	4.29539	3.26005	11.3238
15	78166707	78189921	-1	ENSMUSG00000071714	Csf2rb2	20.0751	3.06761	0.480595	4.30218	1.69123e-05	0.00307562	protein coding	colony stimulating factor 2 receptor, beta 2, low-affinity (granulocyte-macrophage)	0.873852	0.7188	0.869914	1.42244	0.095355	0.174478	0	0.133573	0.188966	0.279981	0.229693	0.198007	56	44	44	73	3	6	0	3	7	10	9	7	55.6422	35.4862	36.2864	67.8082	3.49397	6.26244	0	4.16208	6.6648	9.76227	8.9141	6.41885
15	75003226	75006977	-1	ENSMUSG00000102051	Ly6a2	5.5557	5.31162	1.00703	4.28151	1.85629e-05	0.00319331	transcribed unprocessed pseudogene	lymphocyte antigen 6 complex, locus A2	1.57019	3.81238	2.92912	1.87332	0	0	0.247075	0	0.234981	0.241977	0	0	13	27	17	11	0	0	1	0	1	1	0	0	12.5886	23.9239	15.6034	11.3096	0	0	1.12476	0	1.04914	1.06891	0	0
9	47441471	47769413	1	ENSMUSG00000032076	Cadm1	59.6938	4.89497	0.908841	4.28564	1.82211e-05	0.00319331	protein coding	cell adhesion molecule 1	10.1774	8.65547	1.85557	1.9829	0.536831	0.874382	0.423536	0	0.210315	0.093842	0.111215	0.059111	365	241	60	51	9	18	9	0	2	2	3	1	347.201	231.123	42.0609	50.9394	10.7191	16.9248	8.20422	0	3.99566	1.76392	2.35754	1.03654
12	113382178	113386350	-1	ENSMUSG00000076617	Ighm	140337	3.29912	0.536691	4.28388	1.83665e-05	0.00319331	IG C gene	immunoglobulin heavy constant mu	32177.4	12330.2	17888	16458.9	1608.23	1454.56	1560.86	1651.48	5683.4	5637.72	2776.52	3837.08	664814	218879	262151	243271	23615	16235	17578	17059	62198	59694	33930	51555	681265	204336	251644	262410	19929.3	17473.4	18764.4	17160.1	67011.4	65767.3	36527.2	41758.5
10	75236949	75277513	1	ENSMUSG00000033427	Upb1	28.1924	2.93811	0.451901	4.2888	1.79644e-05	0.00319331	protein coding	ureidopropionase, beta	1.40936	2.20641	3.70541	1.23769	0.315241	0.409139	0.275783	0.298528	0.465526	0.839184	0.072477	0.39703	64	85	44	40	9	10	6	6	11	19	2	11	57.9981	71.0705	101.318	38.3545	7.593	9.55308	6.44415	6.02917	10.6687	19.0279	1.85328	8.39836
12	112586479	112607794	1	ENSMUSG00000011148	Adssl1	98.1493	2.56246	0.366278	4.26578	1.99206e-05	0.00338119	protein coding	adenylosuccinate synthetase like 1	12.6645	15.5328	9.78325	10.2759	2.53257	2.03204	1.9062	2.8752	2.46203	8.3664	2.27646	2.08397	226	332	173	183	40	25	23	32	32	53	32	32	283.274	271.944	145.399	173.082	33.1557	25.7888	24.2099	31.5622	30.6681	103.109	31.6394	23.96
19	36998691	37186000	-1	ENSMUSG00000039652	Cpeb3	61.1727	3.17621	0.510732	4.26095	2.0356e-05	0.00340343	protein coding	cytoplasmic polyadenylation element binding protein 3	6.06667	3.45565	5.15115	3.42762	0.588848	0.35602	0.08862	0.896666	1.94661	0.799975	0.270765	0.980283	286	135	108	110	12	6	2	11	52	20	7	36	247.283	110.251	139.51	105.208	14.0483	8.23373	2.05107	17.9372	44.1873	17.9664	6.85781	20.5387
6	5216258	5220486	-1	ENSMUSG00000107881	Gm44250	131.62	2.99038	0.467396	4.25843	2.05863e-05	0.00340343	TEC	predicted gene, 44250	8.14246	6.42049	5.04692	5.05913	0.592322	0.587686	0.680734	0.455908	1.73011	3.42827	0.622445	1.1452	525	351	229	231	24	18	21	13	57	109	22	45	505.338	311.892	208.119	236.437	21.516	20.6943	23.9888	13.8862	59.7965	117.231	24.0036	36.533
6	68967742	68968278	-1	ENSMUSG00000076539	Igkv4-81	13.4629	4.82085	0.89983	4.2462	2.1743e-05	0.00351439	IG V gene	immunoglobulin kappa variable 4-81	50.713	7.20927	8.98633	17.0176	0.929751	0	0	2.641	1.50912	0	1.03892	3.71755	129	16	16	23	1	0	0	2	2	0	1	4	101.929	11.3418	12.0011	25.7566	1.09376	0	0	2.6051	1.68919	0	1.29751	3.84074
2	119181710	119184862	1	ENSMUSG00000027313	Chac1	46.9547	4.16202	0.745776	4.2399	2.23618e-05	0.00351439	protein coding	ChaC, cation transport regulator 1	11.8197	4.63577	5.04424	5.56122	0.278115	0	0.545781	0.098648	3.84918	0.884809	0.397293	0.071487	270	90	81	90	4	0	6	1	45	10	5	1	260.498	79.9702	73.8671	92.2951	3.58755	0	6.82999	1.067	47.2433	10.7445	5.44073	0.809848
18	67523787	67535819	1	ENSMUSG00000001473	Tubb6	35.4394	3.36079	0.556523	4.24203	2.21506e-05	0.00351439	protein coding	tubulin, beta 6 class V	3.73103	6.63413	5.83678	4.10458	1.00999	0.961426	0.08389	0.181902	1.18268	1.54994	0.366364	0.197761	90	125	79	66	13	10	1	2	15	19	5	3	83.4742	116.177	86.7672	69.1521	13.2258	12.2045	1.06572	1.99729	14.7356	19.1065	5.09315	2.27427
9	123901987	123913594	1	ENSMUSG00000049103	Ccr2	19.2059	3.16142	0.509218	4.24459	2.1899e-05	0.00351439	protein coding	chemokine (C-C motif) receptor 2	0.700993	2.00946	1.42294	0.843544	0.148828	0.333119	0.377965	0.145185	0.05938	0.152096	0.103079	0.149107	32	82	41	27	4	14	16	4	1	3	5	3	34.5648	77.5552	46.6193	31.3214	4.29522	9.31966	10.5822	3.51335	1.63057	4.13217	3.1582	3.77918
4	137469044	137523695	-1	ENSMUSG00000028766	Alpl	140.485	3.04315	0.482553	4.23404	2.29529e-05	0.0035633	protein coding	alkaline phosphatase, liver/bone/kidney	15.5731	11.8071	7.51893	12.6943	1.33011	1.23053	0.618922	0.974911	4.85539	5.00159	1.17901	2.0328	560	358	196	309	31	17	11	16	92	88	24	46	536.729	318.519	172.185	329.458	26.8317	24.0633	12.1122	16.4902	93.1924	94.9795	25.2493	36.0126
12	113842716	113843161	-1	ENSMUSG00000096638	Ighv2-9	162.529	4.02471	0.716274	4.22284	2.41245e-05	0.00365601	IG V gene	immunoglobulin heavy variable 2-9	144.645	286.481	431.318	23.7415	4.18312	17.4437	15.8579	9.29096	16.2518	57.4493	9.34572	20.6067	376	649	785	44	7	23	21	11	22	76	14	34	373.066	578.012	739.549	46.111	6.31481	25.527	23.2238	11.7604	23.3432	81.3732	14.9777	27.0856
17	71559167	71618973	-1	ENSMUSG00000024053	Emilin2	19.7564	3.99925	0.71012	4.22358	2.40447e-05	0.00365601	protein coding	elastin microfibril interfacer 2	0.424197	3.78287	1.25762	1.86836	0.363078	0.071629	0	0.038476	0.333038	0.138027	0.15519	0.375538	25	97	52	79	1	2	0	1	10	4	5	3	15.5901	108.821	30.7108	51.7076	7.81016	1.49366	0	0.69398	6.81634	2.79502	3.544	7.09437
16	18880368	18880821	-1	ENSMUSG00000105906	Iglc1	1738.44	2.9943	0.473905	4.20823	2.57381e-05	0.00385466	IG C gene	immunoglobulin lambda constant 1	1990.37	925.979	1226.83	1026.49	150.649	100.887	136.453	129.534	486.881	335.501	287.351	309.356	7843	3153	3382	2875	379	198	269	231	993	668	644	770	7713.04	2808.68	3158.88	2995.42	341.692	221.822	300.247	246.351	1050.73	716.35	691.916	616.21
16	33650035	33769708	1	ENSMUSG00000022817	Itgb5	22.8387	4.08375	0.733873	4.20202	2.64545e-05	0.00386935	protein coding	integrin beta 5	2.2568	0.693973	3.59545	1.547	0	0.256108	0.067705	0.04951	0.38582	0.411397	0	0.15956	107	29	54	50	0	6	1	1	9	10	0	3	87.292	21.0104	92.4046	45.0594	0	5.62063	1.48699	0.939844	8.31078	8.76767	0	3.17237
6	68608947	68609426	-1	ENSMUSG00000094420	Igkv10-96	1843.5	3.45667	0.584642	4.202	2.64562e-05	0.00386935	IG V gene	immunoglobulin kappa variable 10-96	859.881	5273.29	2702.68	780.159	151.162	170.664	172.311	207.681	324.232	803.886	204.964	402.246	2199	11766	4838	1423	249	222	225	242	432	1050	302	659	2182.84	10479.5	4559.1	1491.64	224.624	246.294	248.716	258.769	458.425	1124.19	323.027	524.879
19	6955109	6957869	-1	ENSMUSG00000056629	Fkbp2	333.984	2.16428	0.277241	4.19952	2.67481e-05	0.00386935	protein coding	FK506 binding protein 2	162.805	115.864	98.949	88.567	26.5978	29.4762	26.2968	36.5778	55.0098	61.5987	36.241	38.911	1172	728	499	451	130	107	95	124	203	230	151	179	1168.91	651.137	472.046	478.849	111.774	120.079	107.207	128.888	219.953	243.684	161.683	143.604
6	67768030	67768495	1	ENSMUSG00000096461	Igkv14-130	37.8241	3.94685	0.703193	4.19068	2.78126e-05	0.00393393	IG V gene	immunoglobulin kappa variable 14-130	60.2162	32.8628	84.8666	28.8846	1.88119	3.23033	5.53808	6.20364	17.8333	0	0	4.40853	149	71	147	51	3	4	7	7	23	0	0	7	147.42	62.9732	138.05	53.25	2.69557	4.48712	7.69849	7.4536	24.3134	0	0	5.54771
6	67701886	67702645	1	ENSMUSG00000094491	Igkv1-133	59.2741	3.25279	0.537364	4.1923	2.76145e-05	0.00393393	IG V gene	immunoglobulin kappa variable 1-133	109.461	61.8554	31.4901	47.1967	6.18315	10.4424	12.8045	1.58766	12.4982	24.8067	3.77386	8.4842	303	149	61	93	11	15	18	2	18	35	6	15	300.182	132.709	57.3797	97.3908	9.92461	16.6747	19.9385	2.13681	19.0875	37.483	6.42281	11.9595
14	47605208	47623617	1	ENSMUSG00000050335	Lgals3	45.1406	2.27976	0.305704	4.18626	2.83585e-05	0.00393624	protein coding	lectin, galactose binding, soluble 3	6.79158	11.0587	6.44974	8.53507	3.10097	3.17093	2.02464	1.55169	1.98366	3.21876	2.22976	2.00782	104	134	72	87	34	21	17	12	14	22	17	19	99.4804	126.789	62.7722	94.1426	26.5853	26.3532	16.8391	11.1545	16.1811	25.9775	20.2943	15.1172
2	102641486	102732010	-1	ENSMUSG00000005087	Cd44	1104.34	1.9103	0.217486	4.18555	2.84473e-05	0.00393624	protein coding	CD44 antigen	66.7719	60.6154	56.8021	53.351	20.0149	17.0693	18.1851	16.4826	33.4634	32.6791	20.6521	25.1474	3106	2421	1799	1767	622	344	401	336	764	759	584	753	3006.2	2136.07	1699.21	1808.75	527.418	436.031	464.884	364.19	839.013	810.653	577.746	581.963
12	115275786	115276219	-1	ENSMUSG00000095889	Ighv1-58	155.119	3.50171	0.598062	4.18303	2.87655e-05	0.00393747	IG V gene	immunoglobulin heavy variable 1-58	352.313	116.973	107.415	179.808	5.70572	14.459	23.9874	15.2309	55.6539	37.5581	12.7371	43.9203	862	250	184	314	9	18	30	17	71	47	18	69	856.702	222.659	173.567	329.283	8.12149	19.951	33.1233	18.1783	75.3731	50.3259	19.2471	54.9024
6	70648772	70649361	1	ENSMUSG00000096715	Igkv3-4	3048.38	4.72486	0.891727	4.17713	2.95212e-05	0.00399793	IG V gene	immunoglobulin kappa variable 3-4	5870.39	731.815	4632.24	5051.55	49.518	41.3757	57.2163	64.8761	428.529	72.4518	241.79	899.199	15096	1641	8337	9263	82	54	75	76	574	95	358	1481	14982.9	1461.53	7855.64	9709.05	73.9722	59.9174	82.9184	81.2625	609.093	101.713	382.949	1179.67
16	44586099	44615341	1	ENSMUSG00000022667	Cd200r1	15.5965	3.60576	0.625771	4.16408	3.12615e-05	0.00418903	protein coding	CD200 receptor 1	2.85869	2.16414	0.865411	1.31004	0.270628	0.153696	0.235614	0	0.145118	0.525607	0.177651	0.303433	77	54	17	25	3	3	2	0	2	7	4	5	75.0358	44.4629	15.0933	25.894	4.1577	2.28899	3.51162	0	2.12129	7.60159	2.89747	4.09396
12	115157295	115157754	-1	ENSMUSG00000094787	Ighv1-54	288.922	3.33777	0.562375	4.15696	3.22516e-05	0.00418955	IG V gene	immunoglobulin heavy variable V1-54	169.584	835.617	177.449	130.371	36.5531	34.5022	19.6311	47.6982	112.403	37.7125	37.7571	45.6999	477	2044	349	261	66	49	28	61	164	54	61	82	472.357	1820.59	328.191	273.269	59.5519	54.4906	31.0274	65.1593	173.894	57.8389	65.3045	65.3864
13	38684055	38712800	-1	ENSMUSG00000038991	Txndc5	4593.59	2.87282	0.450052	4.16135	3.16377e-05	0.00418955	protein coding	thioredoxin domain containing 5	471.322	240.896	275.277	297.205	38.3084	34.8439	37.7218	45.8706	119.72	106.509	55.5771	87.9316	19865	8611	8162	8872	1015	699	762	856	2579	2214	1285	2263	19134.4	7654.87	7425.5	9085.86	910.269	802.608	869.551	913.926	2706.7	2382.45	1401.98	1834.93
17	52149889	52153142	1	ENSMUSG00000103358	Gm37593	67.5625	-2.36235	0.327728	-4.15695	3.22526e-05	0.00418955	TEC	predicted gene, 37593	0.204851	0.458854	0.698757	0.665274	2.86764	3.10149	3.89218	6.15692	4.48887	1.8683	2.68823	3.59356	10	19	24	23	88	72	91	133	112	45	72	107	9.63028	16.8844	21.8266	23.5513	78.9049	82.7277	103.896	142.051	117.52	48.3938	78.5267	86.8369
12	115766268	115766700	-1	ENSMUSG00000094124	Ighv1-74	217.386	4.12406	0.761263	4.10379	4.06441e-05	0.00522626	IG V gene	immunoglobulin heavy variable V1-74	743.545	107.719	136.562	58.5138	28.2345	21.6885	17.5907	8.95935	58.1909	24.9492	6.36854	32.9636	1819	230	234	102	45	27	22	10	74	31	9	52	1807.82	204.847	220.732	106.965	40.6074	29.9264	24.2904	10.6931	78.5579	33.1937	9.62357	41.3757
1	93966027	93980278	-1	ENSMUSG00000026285	Pdcd1	8.51583	4.77917	0.925892	4.08165	4.4717e-05	0.00569248	protein coding	programmed cell death 1	1.12329	1.19453	0.515311	1.58571	0	0	0	0	0.212493	0.073303	0	0.177742	31	28	10	31	0	0	0	0	3	1	0	3	29.8552	24.8505	9.10034	31.7369	0	0	0	0	3.14522	1.07347	0	2.42828
6	70120577	70121150	-1	ENSMUSG00000094356	Igkv8-28	707.852	4.38131	0.830963	4.06915	4.71858e-05	0.00594728	IG V gene	immunoglobulin kappa variable 8-28	140.351	429.247	218.707	3027.99	21.2183	47.1444	35.5447	30.784	23.3843	179.319	42.2951	128.086	381	1014	415	5850	37	60	49	38	33	248	66	222	375.284	897.377	388.132	6089.84	33.1702	71.4445	53.9061	40.352	34.7823	263.893	70.1938	175.848
13	100244520	100251079	1	ENSMUSG00000021643	Serf1	13.5511	2.95747	0.483339	4.04988	5.12428e-05	0.00629879	protein coding	small EDRK-rich factor 1	6.90915	5.18706	11.0134	6.56628	1.77281	0.489681	1.64789	0.714873	1.24763	1.86813	1.80879	1.02973	43	27	48	29	7	1	4	2	4	5	5	4	38.4623	22.6017	40.7372	27.5259	5.7763	1.54669	5.20889	1.95308	3.86787	5.73005	6.25673	2.94655
19	11446730	11459556	1	ENSMUSG00000079419	Ms4a6c	76.4645	2.89084	0.467002	4.0489	5.14591e-05	0.00629879	protein coding	membrane-spanning 4-domains, subfamily A, member 6C	13.6571	18.6728	13.2002	12.3578	1.6519	1.50269	1.03861	2.4262	5.26599	3.78318	0.695584	6.88096	219	279	146	131	22	16	7	11	32	34	10	52	212.518	227.434	136.482	144.807	15.0452	13.2673	9.17689	18.5286	45.6343	32.4365	6.72566	55.5192
1	171459971	171480603	-1	ENSMUSG00000038179	Slamf7	878.483	2.07596	0.26552	4.05228	5.07198e-05	0.00629879	protein coding	SLAM family member 7	124.088	79.3118	80.1739	63.0238	22.7462	20.7816	23.6053	22.2348	39.768	35.8793	35.7981	43.7624	2527	1451	1257	1147	413	284	285	331	603	463	465	741	3092.67	1547.22	1327.68	1182.82	331.811	293.874	334.055	271.967	551.967	492.707	554.386	560.638
12	114878219	114878652	-1	ENSMUSG00000095130	Ighv1-39	262.394	3.59619	0.643493	4.03453	5.47115e-05	0.00663312	IG V gene	immunoglobulin heavy variable 1-39	471.482	98.7249	206.149	565.193	24.7248	12.8524	29.5844	27.774	24.3235	42.3528	33.2579	143.218	1154	211	353	987	39	16	37	31	31	53	47	225	1146.91	187.925	332.985	1035.04	35.1931	17.7342	40.8521	33.1486	32.9094	56.7505	50.2564	179.029
6	70703419	70703950	1	ENSMUSG00000076609	Igkc	99544.1	3.56698	0.636839	4.03081	5.55841e-05	0.00667533	IG C gene	immunoglobulin kappa constant	102896	52191.1	44324.5	39787.7	3359.47	3260.21	3297.03	3278.5	15985.6	16517.2	6739.94	9331.06	528851	230748	159423	145194	10979	8261	8397	7595	42404	42663	19552	30072	517648	205513	148162	150728	9891.95	9305.9	9418.07	8094.48	44785.7	45783.7	21068.8	24129.3
13	119472064	119545488	-1	ENSMUSG00000116207	Nnt	47.147	-8.67107	1.90489	-4.02704	5.64828e-05	0.00671988	protein coding	nicotinamide nucleotide transhydrogenase	0	0	0	0	4.52984	0	1.82797	3.5433	3.59978	2.9467	4.23394	0	0	0	0	0	143	0	44	79	92	73	117	0	0	0	0	0	128.282	0	50.2634	84.419	96.5802	78.5451	127.675	0
1	135980488	136047560	1	ENSMUSG00000026407	Cacna1s	83.5657	2.84045	0.458567	4.01349	5.98279e-05	0.00705156	protein coding	calcium channel, voltage-dependent, L type, alpha 1S subunit	24.9556	18.9718	16.5927	14.4371	2.15091	3.78116	0.653442	2.13229	7.73512	7.17293	4.2936	2.96684	317	208	148	132	20	23	4	12	51	45	31	28	316.869	188.552	139.986	138.04	15.985	27.2406	4.71111	13.2873	54.6957	50.1821	33.8752	19.3635
	34621717	34637999	1	ENSMUSG00000031532	Saraf	229.561	2.02516	0.255567	4.01133	6.03787e-05	0.00705156	protein coding	store-operated calcium entry-associated regulatory factor	32.1652	22.3092	19.8221	17.5788	8.39126	9.31767	8.3776	5.75662	10.44	9.99958	5.85689	8.98564	852	498	374	338	125	107	84	67	140	131	82	128	781.383	424.2	319.953	321.572	119.312	128.429	115.559	68.6317	141.239	133.845	88.4086	112.203
10	84362169	84369926	-1	ENSMUSG00000046841	Ckap4	1289.51	2.45337	0.363453	3.99879	6.36672e-05	0.00736803	protein coding	cytoskeleton-associated protein 4	118.761	71.8911	62.8706	63.863	17.5525	11.9763	16.8526	14.7319	33.7713	33.1905	22.9725	22.3661	5197	2678	1960	2011	465	263	364	301	759	715	582	594	5081.76	2407.84	1787.51	2057.8	439.603	290.767	409.463	309.372	804.758	782.522	610.801	491.937
1	173574859	173594509	-1	ENSMUSG00000073489	Ifi204	9.30689	4.19823	0.802024	3.98769	6.67189e-05	0.00765164	protein coding	interferon activated gene 204	1.79306	0.865216	0.80945	0.822492	0	0	0.151928	0.164678	0.151297	0.230481	0.090306	0	58	20	19	19	0	0	2	2	2	3	1	0	49.3755	18.5485	15.26	17.1652	0	0	2.38407	2.23353	2.20098	3.17104	1.34385	0
10	44313173	44404497	-1	ENSMUSG00000038151	Prdm1	415.233	3.27276	0.574191	3.95819	7.5519e-05	0.00852286	protein coding	PR domain containing 1, with ZNF domain	28.3516	17.6012	16.0651	21.2852	1.74824	1.53043	0.751655	1.47775	7.84362	5.1055	2.50609	4.78038	1641	890	666	776	73	45	26	40	266	161	97	175	1700.61	826.38	640.277	961.428	61.3771	52.0861	25.6006	43.5019	262.011	168.735	93.4054	147.39
19	23736251	23926960	1	ENSMUSG00000024897	Apba1	41.7516	2.68925	0.42682	3.95776	7.56546e-05	0.00852286	protein coding	amyloid beta (A4) precursor protein binding, family A, member 1	1.12751	0.986358	1.47755	1.5923	0.309465	0.245852	0.081359	0.340842	0.665999	0.315594	0.212997	0.111753	116	86	107	116	20	12	4	8	35	16	12	7	105.608	72.3144	91.9562	112.31	16.9656	13.0657	4.32703	15.6679	34.74	16.2874	12.3966	5.38044
16	18903767	18904250	-1	ENSMUSG00000076934	Iglv1	999.453	3.24186	0.56706	3.95348	7.70242e-05	0.00860104	IG V gene	immunoglobulin lambda variable 1	1626.14	626.203	893.566	818.053	99.9308	44.8459	74.8609	65.052	331.071	221.595	199.062	222.741	4895	1638	1882	1753	193	68	114	89	518	339	344	427	4840.83	1458.83	1767.27	1833.63	174.107	75.7429	126.532	95.0341	549.088	363.2	368.483	340.692
12	32008475	32111295	-1	ENSMUSG00000002997	Prkar2b	47.0329	2.78991	0.454485	3.93832	8.20527e-05	0.00908287	protein coding	protein kinase, cAMP dependent regulatory, type II beta	3.5302	3.62791	3.61419	3.51529	0.407044	0.44854	0.552595	0.144621	1.66762	1.39597	0.717561	0.645451	119	124	89	90	13	10	7	3	31	22	20	20	134.884	108.499	91.7552	101.143	9.10292	9.72393	11.9887	2.7119	35.484	29.3887	17.0361	12.6766
10	122514667	122781700	1	ENSMUSG00000034613	Ppm1h	61.8048	3.53586	0.64671	3.92117	8.81205e-05	0.00950656	protein coding	protein phosphatase 1H (PP2C domain containing)	3.53256	6.78516	5.08221	11.388	1.44452	0.191893	0.1435	1.96111	2.00224	0.324041	0.115647	0.769373	162	156	75	152	21	9	3	12	29	9	5	5	106.697	160.41	101.994	259.014	25.5367	3.28852	2.46104	29.07	33.6786	5.39265	2.17044	11.9448
12	91772817	91815931	-1	ENSMUSG00000020964	Sel1l	1889.03	1.95728	0.244099	3.92167	8.79384e-05	0.00950656	protein coding	sel-1 suppressor of lin-12-like (C. elegans)	214.306	160.713	148.34	139.706	54.4847	48.8498	45.7657	67.9535	87.7776	98.9727	35.2067	69.8264	7032	4011	2945	2723	967	562	613	739	1383	1297	698	1208	5895.63	3460.64	2711.52	2894.18	877.303	762.499	714.894	917.461	1344.79	1500.21	601.827	987.403
13	110531580	110537378	1	ENSMUSG00000021701	Plk2	555.673	-2.2177	0.310306	-3.92419	8.70218e-05	0.00950656	protein coding	polo like kinase 2	2.70112	6.11867	14.9368	7.2671	58.8751	35.1031	69.4127	73.2116	40.109	22.4326	41.3572	43.0075	110	175	253	186	1060	507	820	876	625	346	552	695	76.6082	135.831	281.479	155.205	977.33	564.881	1117.83	1019.04	633.503	350.552	728.838	626.98
15	3298029	3309990	1	ENSMUSG00000064373	Selenop	366.245	1.93645	0.239818	3.90485	9.42837e-05	0.010086	protein coding	selenoprotein P	46.8017	22.957	28.4449	33.8643	9.5789	16.4336	11.0478	14.4472	11.404	10.9732	12.1905	17.1869	1355	584	581	712	156	156	144	163	175	162	199	267	1237.08	474.964	499.571	674.045	148.193	246.461	165.812	187.412	167.868	159.812	200.219	233.513
17	35561218	35565738	1	ENSMUSG00000091705	H2-Q2	14.5323	4.37297	0.864617	3.90112	9.57493e-05	0.0101574	protein coding	histocompatibility 2, Q region locus 2	5.70996	2.82808	1.28049	1.69808	0	0	0.413063	0	0.116067	0.839622	0.107618	0.290856	92	40	14	20	0	0	3	0	1	7	1	3	90.3751	34.9474	13.4336	20.1896	0	0	3.70322	0	1.02057	7.30438	1.05579	2.3576
6	68098030	68098811	1	ENSMUSG00000094335	Igkv1-117	1566.19	2.6508	0.423387	3.89903	9.65794e-05	0.0101608	IG V gene	immunoglobulin kappa variable 1-117	1474.95	1604.14	975.923	1507.1	199.845	175.411	225.853	182.723	332.648	293.006	360.516	840.126	4716	4453	2183	3430	410	282	364	265	552	476	660	1709	4658.02	3965.97	2048	3583.91	369.868	314.487	404.516	282.9	584.976	510.051	707.488	1364.15
12	114057548	114057978	-1	ENSMUSG00000096805	Ighv9-1	120.043	2.76924	0.455061	3.88791	0.000101111	0.0105503	IG V gene	immunoglobulin heavy variable 9-1	239.482	110.89	98.0743	107.083	17.7511	24.0983	14.6756	16.1268	39.1929	23.1742	27.597	88.1697	586	237	168	187	28	30	13	18	50	29	39	139	565.897	205.101	153.984	190.545	24.551	32.3095	19.6908	18.7022	51.5757	30.1723	40.5206	107.467
1	92759367	92788501	1	ENSMUSG00000034220	Gpc1	18.6821	3.14158	0.553406	3.86983	0.000108913	0.0110917	protein coding	glypican 1	0.864433	0.759993	2.35074	0.754595	0.07503	0.132338	0.361489	0.035538	0.246069	0.382464	0.143352	0.128942	55	41	29	34	3	4	4	1	8	12	5	5	43.7033	30.0748	78.9669	28.7282	2.22022	3.79619	10.3772	0.881775	6.92811	10.6541	4.50336	3.35086
GL456211.1	167446	196478	1	ENSMUSG00000079190		135.334	2.82005	0.470078	3.87181	0.000108031	0.0110917	protein coding		28.3237	26.3035	15.1023	7.85876	2.89254	2.2046	1.34651	1.74436	8.40231	6.4553	5.04225	4.70765	572	452	214	113	37	21	13	16	87	65	56	58	552.448	401.857	195.403	115.993	33.2068	24.0451	14.7964	17.0781	91.4034	69.8657	60.9383	46.975
19	40600810	40730046	1	ENSMUSG00000048120	Entpd1	380.974	2.14496	0.29573	3.87163	0.00010811	0.0110917	protein coding	ectonucleoside triphosphate diphosphohydrolase 1	34.539	27.5675	26.4371	22.1844	9.37542	7.11807	4.61375	5.44789	15.4969	10.287	11.3251	9.30515	1184	814	553	600	231	119	86	107	308	221	138	233	1202.36	751.16	611.502	581.548	191.027	140.594	91.1978	93.0751	300.432	197.312	244.971	166.505
11	52143198	52174158	-1	ENSMUSG00000000782	Tcf7	49.9178	3.0924	0.541865	3.86148	0.000112702	0.0113865	protein coding	transcription factor 7, T cell specific	6.02564	7.44787	5.7284	5.20808	0.842146	0.521415	0	0.46561	1.42839	2.70863	0.675237	1.46507	111	155	78	126	17	9	0	2	25	40	11	30	150.011	145.132	94.7572	97.6361	12.2712	7.3652	0	5.68883	19.8035	37.1545	10.4454	18.7482
18	36150705	36330433	-1	ENSMUSG00000060275	Nrg2	33.4859	4.0453	0.789515	3.85718	0.000114704	0.0114975	protein coding	neuregulin 2	6.65937	1.91143	0.342602	2.77243	0	0.144839	0.07192	0.389673	0.514426	0.666056	0.376842	0.107749	192	74	11	56	0	2	1	5	12	15	6	3	228.164	51.2604	7.79942	71.5299	0	2.81564	1.39916	6.5523	9.8155	12.5738	8.02273	1.89761
7	99486776	99512669	-1	ENSMUSG00000035227	Spcs2	816.52	1.8715	0.229681	3.7944	0.000148004	0.0147194	protein coding	signal peptidase complex subunit 2 homolog (S. cerevisiae)	180.429	149.691	132.758	112.783	55.8473	48.4017	39.6567	47.5795	76.0396	83.0708	42.8467	71.0189	2457	1638	1179	1125	482	316	286	293	566	568	391	581	2428.41	1576.96	1187.23	1143.07	439.944	369.621	303.066	314.28	569.943	616.036	358.33	491.349
14	63359911	63383372	1	ENSMUSG00000021939	Ctsb	1175.31	1.95236	0.251363	3.78878	0.000151388	0.0149393	protein coding	cathepsin B	79.9079	57.6123	54.7157	39.1807	17.6459	21.2678	12.8746	23.7247	28.0916	31.7216	15.4757	28.3164	3499	2323	1860	1534	586	488	387	397	685	834	594	811	3892.84	2196.86	1771.12	1437.35	503.152	587.869	356.137	567.23	762.131	851.48	468.466	709.079
13	37051152	37234220	-1	ENSMUSG00000039109	F13a1	14.6942	4.03963	0.80289	3.78586	0.000153176	0.0149995	protein coding	coagulation factor XIII, A1 subunit	0.333002	1.01047	1.32501	1.76891	0	0.036001	0.1187	0.089783	0.534735	0.034686	0.0312	0.028064	20	35	56	33	0	1	3	2	7	1	1	1	15.3754	36.5185	40.6497	61.5032	0	0.943135	3.11196	2.03449	13.7498	0.882433	0.895113	0.666043
6	69036674	69037208	-1	ENSMUSG00000094315	Igkv4-78	8.2833	4.95513	1.05034	3.76558	0.000166165	0.0161472	IG V gene	immunoglobulin kappa variable 4-78	5.89686	14.5063	1.13361	25.3564	0	1.54832	0.770736	0.862756	0	0	0	1.22698	15	32	2	46	0	2	1	1	0	0	0	2	14.8792	28.477	1.88327	48.1795	0	2.21667	1.10427	1.06839	0	0	0	1.5914
19	58961788	59064532	-1	ENSMUSG00000041362	Shtn1	36.9707	2.92159	0.512129	3.75216	0.000175317	0.0169075	protein coding	shootin 1	1.68928	3.87384	1.45916	0.958837	0.44799	0.366161	0.180404	0.290201	0.479884	0.906697	0.09583	0.271703	102	194	62	41	17	10	4	6	14	27	3	10	92.5944	166.202	53.1431	39.5769	14.3725	11.3877	5.61482	7.80662	14.6486	27.3834	3.26389	7.6552
3	123061104	123159290	1	ENSMUSG00000039234	Sec24d	272.8	2.32335	0.353183	3.74692	0.000179018	0.0171346	protein coding	Sec24 related gene family, member D (S. cerevisiae)	24.3003	17.4508	10.8407	13.6436	6.47967	5.57194	2.33216	3.25022	7.21801	8.07562	2.92181	3.93224	1341	775	444	569	79	50	65	33	214	220	87	142	1024.91	576.103	303.801	433.327	159.958	133.34	55.8519	67.2772	169.538	187.669	76.573	85.2497
7	30134407	30144960	-1	ENSMUSG00000006651	Aplp1	12.665	4.59643	0.962715	3.73571	0.000187185	0.0176287	protein coding	amyloid beta (A4) precursor-like protein 1	1.37495	1.35591	0.748659	3.94927	0	0	0	0	0.734419	0.059229	0.053236	0.143669	47	25	18	22	0	0	0	0	6	1	1	3	32.3666	24.9835	11.7099	70.0067	0	0	0	0	9.62789	0.768224	0.778692	1.73842
12	115611565	115612007	-1	ENSMUSG00000076731	Ighv8-12	306.543	3.58269	0.691979	3.73233	0.00018972	0.0176287	IG V gene	immunoglobulin heavy variable V8-12	820.056	113.546	185.343	287.188	17.6991	24.7731	30.0587	12.9413	88.2835	41.5491	57.9353	101.839	2086	252	330	521	29	32	39	15	117	54	85	166	2071	224.451	311.01	546.159	26.1619	35.4975	43.1038	16.0398	124.164	57.8151	90.9142	132.201
15	78363456	78379471	-1	ENSMUSG00000068227	Il2rb	65.8912	3.15122	0.576264	3.73305	0.000189173	0.0176287	protein coding	interleukin 2 receptor, beta chain	5.11467	4.5735	4.26476	4.37988	0.174279	0.494031	0.154205	0.176889	2.46536	1.13406	0.542281	0.946355	188	166	121	140	7	15	2	5	46	18	19	27	222.154	155.487	123.081	143.255	4.43056	12.175	3.80311	3.77065	59.6336	27.1402	14.6356	21.1285
15	78209952	78238047	1	ENSMUSG00000071713	Csf2rb	452.228	2.03521	0.276955	3.73783	0.000185613	0.0176287	protein coding	colony stimulating factor 2 receptor, beta, low-affinity (granulocyte-macrophage)	33.1397	34.4612	37.0438	26.579	11.446	7.49043	5.62462	10.1065	11.97	23.4982	8.70436	13.3662	1485	1199	881	779	276	114	67	83	393	353	187	368	1154.41	939.953	857.986	697.477	233.431	148.092	111.265	172.799	232.247	451.103	188.579	239.387
6	87807256	87809848	-1	ENSMUSG00000108042	B130021K23Rik	64.3934	-2.24803	0.334805	-3.72763	0.000193287	0.01783	TEC	RIKEN cDNA B130021K23 gene	0.44504	0.462719	1.07925	0.628344	3.95467	2.58406	5.29571	7.21247	5.7347	2.54506	3.57493	3.60174	17	15	29	17	95	47	97	122	112	48	75	84	16.3808	13.331	26.3946	17.4159	85.197	53.9658	110.679	130.286	117.55	51.6148	81.7622	68.1438
11	5751640	5753733	-1	ENSMUSG00000020475	Pgam2	24.4769	4.60613	0.969746	3.71863	0.000200308	0.0183447	protein coding	phosphoglycerate mutase 2	14.4382	9.09567	1.27757	7.3024	0	0	0.409109	1.1144	0.581839	2.19947	0	0	145	78	9	52	0	0	2	5	3	11	0	0	140.329	69.196	8.25049	53.4459	0	0	2.25777	5.31564	3.1493	11.7786	0	0
9	48379812	48391923	-1	ENSMUSG00000032026	Rexo2	574.345	2.16684	0.314355	3.71185	0.00020575	0.0187085	protein coding	RNA exonuclease 2	145.211	105.177	98.3563	106.347	23.8722	20.3268	25.6827	22.9773	67.6134	57.347	33.0729	48.3547	1961	1182	940	1020	204	124	150	126	462	384	266	384	1856.83	1052.69	835.664	1024.02	178.666	147.476	186.473	144.195	481.481	404.039	262.78	317.825
12	114398408	114398864	-1	ENSMUSG00000076680	Ighv6-6	177.313	3.18383	0.588629	3.71004	0.000207228	0.0187093	IG V gene	immunoglobulin heavy variable 6-6	171.254	333.7	145.83	218.9	20.2485	21.7895	26.3405	3.46944	50.0713	62.6547	60.983	22.8176	433	737	258	395	33	28	34	4	66	81	89	37	429.963	656.439	243.179	414.083	29.7717	31.0567	37.5717	4.27729	70.0477	86.7214	95.1893	29.4624
6	7675169	7693254	-1	ENSMUSG00000029752	Asns	52.7029	3.08969	0.563879	3.70592	0.000210621	0.0188082	protein coding	asparagine synthetase	11.4565	8.66228	3.92617	3.592	0.38775	1.30209	0.145119	1.99782	1.63536	2.46832	0.697027	1.76716	324	188	62	73	7	7	2	5	24	35	11	31	248.209	146.895	56.5188	58.6021	4.91693	16.0061	1.78523	21.2422	19.7312	29.4651	9.38348	19.6797
1	131950544	131995800	-1	ENSMUSG00000059149	Mfsd4a	38.1314	3.01386	0.543531	3.70513	0.000211279	0.0188082	protein coding	major facilitator superfamily domain containing 4A	5.07132	2.51052	2.08781	1.01192	0.61424	0.49146	0.2352	0.110006	0.687416	1.01372	0.304636	0.57752	179	83	57	31	14	10	4	2	16	24	8	17	202.859	78.6048	55.4912	30.4812	14.3811	11.1543	5.34216	2.15959	15.3134	22.3427	7.57192	11.8746
1	96743995	96799896	-1	ENSMUSG00000040693	Slco4c1	10.5152	4.60307	0.973747	3.70022	0.000215416	0.0190433	protein coding	solute carrier organic anion transporter family, member 4C1	0.915323	0.250375	0.188487	0.487058	0	0.055879	0.027739	0.150021	0	0	0.024209	0	69	16	10	26	0	2	1	5	0	0	1	0	66.3996	14.2165	9.08514	26.6063	0	2.29995	1.14258	5.341	0	0	1.09124	0
7	45139882	45159830	-1	ENSMUSG00000030824	Nucb1	1483.89	1.93789	0.25422	3.68929	0.000224877	0.0197426	protein coding	nucleobindin 1	344.34	223.383	211.615	219.831	100.537	68.8106	63.3448	75.0898	139.043	140.32	81.0237	107.183	4411	2516	2064	2036	800	613	542	515	1024	995	709	1011	4880.94	2478.43	1993.07	2346.48	834.105	553.415	509.838	522.368	1097.59	1095.91	713.637	780.944
12	115811501	115811951	-1	ENSMUSG00000093896	Ighv1-76	277.953	3.36007	0.642262	3.67462	0.000238207	0.0206284	IG V gene	immunoglobulin heavy variable 1-76	546.663	444.783	355.75	37.1723	28.5506	51.9667	17.5835	28.4375	44.3885	111.759	61.1201	60.17	1312	1040	668	71	42	50	24	25	62	153	81	95	1316.49	838.649	569.41	67.3459	40.2547	71.7355	24.051	33.6197	59.5483	148.335	91.4862	74.5041
12	113649102	113649665	-1	ENSMUSG00000096498	Ighv2-5	114.098	2.85206	0.503903	3.67543	0.000237453	0.0206284	IG V gene	immunoglobulin heavy variable 2-5	121.095	118.16	39.223	26.5306	13.3877	13.9438	11.9237	11.3329	19.7437	3.65915	17.1186	39.2813	505	442	119	73	37	30	21	22	44	8	42	107	500.342	382.002	107.618	83.0428	32.3572	32.67	27.9579	22.7573	45.1338	8.32545	43.8206	83.1516
11	118319029	118340789	1	ENSMUSG00000017446	C1qtnf1	11.1871	4.99423	1.08818	3.67057	0.000242013	0.0206767	protein coding	C1q and tumor necrosis factor related protein 1	2.40594	1.17183	0.462349	0.420906	0	0.341443	0	0	0	0.054886	0	0.044383	54	29	12	11	0	6	0	0	0	1	0	1	77.0096	29.3587	9.83305	10.1451	0	6.20095	0	0	0	0.967965	0	0.730219
9	88209250	88254145	1	ENSMUSG00000032420	Nt5e	116.662	2.17073	0.318912	3.67101	0.000241596	0.0206767	protein coding	5' nucleotidase, ecto	5.89863	6.86838	4.77278	4.07561	3.03317	1.85262	1.23089	1.10133	0.98083	1.87926	2.03669	1.66355	338	341	195	166	110	47	34	28	29	55	64	59	326.609	297.675	175.593	169.935	98.2999	58.2029	38.6993	29.9279	30.2445	57.3332	70.0732	47.3469
8	15011066	15011586	-1	ENSMUSG00000090024	Gm16350	6.75419	4.61673	0.986166	3.66747	0.000244965	0.0207894	lncRNA	predicted gene 16350	6.02107	4.84416	3.36776	10.6782	0	0	0	0	1.01109	0	1.37944	0.414027	23	16	9	29	0	0	0	0	2	0	3	1	22.4636	14.146	8.34845	29.9996	0	0	0	0	2.10074	0	3.19785	0.793987
12	114355332	114355789	-1	ENSMUSG00000076677	Ighv6-3	393.897	3.02355	0.552051	3.66551	0.000246845	0.0208102	IG V gene	immunoglobulin heavy variable 6-3	540.071	497.017	453.529	382.214	40.7158	55.5411	22.5839	31.3924	199.093	80.099	120.548	116.542	1359	1091	799	686	66	71	29	36	261	103	175	188	1349.69	971.755	753.186	719.162	59.5454	78.7409	32.0415	38.4957	277.037	110.274	187.162	149.682
7	28921351	28931940	-1	ENSMUSG00000046410	Kcnk6	70.1112	2.52177	0.416937	3.64988	0.000262363	0.0219729	protein coding	potassium inwardly-rectifying channel, subfamily K, member 6	4.19967	3.62452	3.68231	1.84045	0.614496	0.711237	0.30264	0.400197	1.32255	1.72931	0.880506	0.818398	261	191	98	81	24	21	9	11	42	53	30	31	241.053	162.839	140.435	79.5486	20.644	23.1628	9.86345	11.2733	42.2752	54.6903	31.4036	24.1457
10	117113236	117118226	-1	ENSMUSG00000069516	Lyz2	119.527	4.69959	1.01674	3.63868	0.000274038	0.0226526	protein coding	lysozyme 2	11.4773	23.3914	43.2113	25.8516	0.269159	0.353855	0	0	3.2014	2.28206	2.96931	1.47404	203	352	537	324	3	3	0	0	29	20	29	16	196.056	312.758	490.453	332.539	2.6911	3.42962	0	0	30.4549	21.4788	31.5171	12.9428
12	80214321	80307145	-1	ENSMUSG00000015143	Actn1	375.757	2.73418	0.476395	3.64021	0.00027242	0.0226526	protein coding	actinin, alpha 1	19.0824	28.4212	17.1144	21.1598	4.59107	2.9002	1.32769	2.24092	5.01961	10.3194	3.32278	7.54459	1031	1309	669	839	151	51	34	52	145	248	103	260	964.142	1123.98	574.552	805.068	135.769	83.1412	38.0901	55.5668	141.239	287.279	104.318	195.94
6	124881324	124888668	-1	ENSMUSG00000030124	Lag3	20.3198	3.50529	0.689427	3.63387	0.000279205	0.0229309	protein coding	lymphocyte-activation gene 3	3.38099	3.07817	2.77573	3.44438	0.444031	0	0.507917	0	1.03277	1.05785	0.126732	0.228021	97	75	56	70	1	0	7	0	5	15	2	4	67.961	48.4305	37.0725	52.1363	5.22405	0	5.79714	0	11.5609	11.7161	1.5829	2.35596
X	35375763	35434912	1	ENSMUSG00000017057	Il13ra1	42.3188	3.79735	0.772944	3.61909	0.000295643	0.0239716	protein coding	interleukin 13 receptor, alpha 1	4.41497	2.07822	1.94805	1.15634	0.141621	0.112371	0.223142	0.040243	0.278684	1.22713	0	0.116799	248	99	77	46	5	3	6	1	8	34	0	4	238.736	87.9616	69.9921	47.0858	4.48227	3.44767	6.85139	1.06798	8.39227	36.5613	0	3.24644
12	114814810	114815280	-1	ENSMUSG00000093955	Ighv1-34	27.1061	2.92836	0.532775	3.61947	0.000295208	0.0239716	IG V gene	immunoglobulin heavy variable 1-34	7.24638	15.4465	84.4248	15.8718	3.70004	5.59354	6.69114	6.72576	4.01368	6.33719	4.77611	4.29526	22	40	175	34	7	8	10	9	6	10	8	8	21.7628	35.6266	164.36	35.5683	6.31502	8.90817	11.0961	9.61086	6.36057	10.7131	8.56906	6.38223
2	101544630	101713372	-1	ENSMUSG00000032841	Prr5l	6.89688	4.48518	0.967131	3.60363	0.000313806	0.0251242	protein coding	proline rich 5 like	0.252555	0.970013	0.411863	0.760941	0	0.132907	0.065979	0	0	0	0.057587	0	16	8	11	24	0	4	2	0	0	0	2	0	10.4139	31.3072	11.2841	23.6276	0	3.10945	1.54478	0	0	0	1.47548	0
12	114442625	114443071	-1	ENSMUSG00000095981	Ighv10-1	136.241	2.60374	0.444856	3.60507	0.000312071	0.0251242	IG V gene	immunoglobulin heavy variable 10-1	148.965	186.449	154.18	115.69	20.6406	24.6454	29.1382	3.43274	53.064	52.8771	58.9881	38.4503	381	416	276	211	34	32	38	4	71	69	87	63	378.199	370.514	260.089	221.178	30.6716	35.5019	42.0053	4.27718	75.343	73.8757	93.0574	50.1781
8	34142551	34188191	1	ENSMUSG00000031584	Gsr	42.4405	2.14687	0.318744	3.59811	0.000320541	0.025503	protein coding	glutathione reductase	2.38072	3.61138	4.12344	3.00375	0.604135	1.24808	1.37351	1.20121	1.23847	0.974729	0.32285	1.53507	94	121	77	84	15	10	26	21	25	19	7	37	81.6107	96.8995	93.9196	77.538	12.1213	24.2752	26.7348	20.2086	23.6427	18.4104	6.87683	27.0486
6	69625808	69626347	-1	ENSMUSG00000095753	Igkv4-53	56.4718	2.52465	0.427115	3.56964	0.000357473	0.0282648	IG V gene	immunoglobulin kappa variable 4-53	80.1661	61.4595	91.0105	42.5861	17.5083	19.7075	4.41781	8.02619	28.7262	24.2281	8.20034	26.3587	214	143	170	58	21	20	6	7	40	33	8	45	183.179	109.951	138.183	72.802	23.5425	25.5504	5.73187	9.0007	36.6298	30.5032	11.6289	30.959
15	38869429	38901583	1	ENSMUSG00000022297	Fzd6	71.169	3.20187	0.617817	3.56394	0.000365325	0.0287073	protein coding	frizzled class receptor 6	5.29311	4.98747	2.63491	4.56452	1.1951	1.76591	0.067305	0.072819	0.283623	1.01226	0.381848	1.08323	308	266	41	209	49	11	2	2	9	31	13	41	255.826	188.679	84.6172	166.127	33.8077	48.4264	1.84709	1.72727	7.63398	26.9568	11.4676	26.9113
12	113860028	113860566	-1	ENSMUSG00000076665	Ighv7-1	23.2478	3.34174	0.657882	3.55952	0.000371536	0.0290163	IG V gene	immunoglobulin heavy variable 7-1	12.6269	35.5492	36.6378	33.4319	0	4.52747	1.50259	5.88138	11.0224	0.749526	1.32821	7.77161	33	81	67	62	0	6	2	7	15	1	2	13	32.7575	72.1862	63.1545	65.0095	0	6.66423	2.2134	7.48814	15.9246	1.07138	2.14107	10.3635
14	30721783	30723629	-1	ENSMUSG00000021917	Spcs1	270.081	2.01789	0.287208	3.54408	0.000393992	0.0305825	protein coding	signal peptidase complex subunit 1 homolog (S. cerevisiae)	109.269	75.1583	69.7544	72.4976	24.6399	26.0244	18.0767	18.4987	41.0615	46.4609	24.6986	39.7501	899	538	411	434	126	110	71	75	174	194	100	209	881.347	474.501	373.835	440.338	116.323	119.1	82.7895	73.227	184.442	206.48	123.786	164.804
5	92494497	92496748	-1	ENSMUSG00000034855	Cxcl10	10.8277	3.65801	0.751207	3.53832	0.00040268	0.0310674	protein coding	chemokine (C-X-C motif) ligand 10	2.64481	1.82439	1.00465	1.55087	0.112267	0.324083	0.514933	0	0.414475	0.142677	0.11241	0	50	24	13	19	1	5	8	0	3	1	2	0	50.3185	27.1682	12.7	22.2188	1.25016	3.4984	5.56274	0	4.39144	1.49564	1.32888	0
8	129412135	129459681	1	ENSMUSG00000025809	Itgb1	963.169	2.27817	0.361791	3.53289	0.000411049	0.031522	protein coding	integrin beta 1 (fibronectin receptor beta)	47.556	64.6993	39.5609	37.0712	14.5612	9.75236	6.937	7.87371	20.248	24.7773	13.9076	14.4072	2720	2940	1570	1457	498	268	192	190	554	688	441	480	2553.75	2719.46	1411.55	1499.07	457.664	297.141	211.519	207.507	605.523	733.107	464.059	397.677
6	67532481	67533200	1	ENSMUSG00000076501	Igkv2-137	948.172	4.2555	0.922201	3.53014	0.000415337	0.0316601	IG V gene	immunoglobulin kappa chain variable 2-137	144.704	2018.03	181.92	544.29	20.2273	19.4848	19.8634	18.0694	24.0981	262.211	22.757	40.9735	674	8099	593	1801	60	45	46	38	58	615	60	120	660.9	7214.51	552.072	1871.97	54.0721	50.5902	51.5129	40.5025	61.2936	659.856	64.5834	96.1922
10	17671974	17721413	1	ENSMUSG00000039891	Txlnb	28.7554	2.66483	0.472677	3.52214	0.000428085	0.0322457	protein coding	taxilin beta	1.95333	1.5522	1.24061	1.29985	0.188392	0.498502	0.467519	0.089338	0.781963	0.330128	0.17997	0.218559	132	86	59	42	8	16	7	1	27	11	5	9	103.451	64.3456	43.6572	51.84	5.83985	14.9798	14.0594	2.32207	23.0633	9.63351	5.92256	5.94987
7	65729397	65739153	1	ENSMUSG00000075701	Selenos	559.981	1.74207	0.21066	3.52259	0.000427358	0.0322457	protein coding	selenoprotein S	125.182	91.9023	79.2111	85.6066	44.4344	39.1728	36.1432	35.291	50.2276	54.9868	35.517	41.6083	1602	1058	740	807	401	261	252	223	386	385	258	364	1675.64	962.888	704.505	862.897	348.127	297.512	274.708	231.837	374.418	405.545	295.41	286.285
7	110226868	110229027	1	ENSMUSG00000030790	Adm	69.7324	2.55322	0.442545	3.50975	0.000448527	0.0335867	protein coding	adrenomedullin	6.62226	13.5163	7.08671	16.3743	2.01817	2.43343	0.76912	1.66949	2.4831	6.63168	1.34404	3.80064	125	217	94	219	24	22	7	14	24	62	14	44	120.769	192.938	85.8725	224.867	21.542	25.1796	7.96434	14.9422	25.2185	66.637	15.2304	35.6275
2	38401655	38484618	1	ENSMUSG00000026749	Nek6	82.2042	2.84295	0.525446	3.5074	0.000452503	0.0336863	protein coding	NIMA (never in mitosis gene a)-related expressed kinase 6	5.07773	4.31817	1.32856	5.16275	0.593171	0.588161	1.22216	0.716126	1.17909	1.29161	0.067427	1.17259	200	158	65	108	26	34	23	26	25	45	6	37	295.209	196.504	51.3216	226.024	20.1846	19.4016	40.3455	20.4329	38.1754	41.3745	2.43581	35.0418
11	5470659	5475893	1	ENSMUSG00000020484	Xbp1	2619.21	2.57984	0.450818	3.50438	0.000457672	0.0338731	protein coding	X-box binding protein 1	399.463	254.87	203.586	227.43	41.4631	41.1216	36.9327	43.1914	130.924	125.023	44.3656	85.1364	11614	6205	4189	4621	680	512	420	500	1772	1542	702	1380	10390.2	5188.91	3518.46	4454.59	631.229	606.872	545.459	551.346	1896.45	1791.75	717.039	1138.26
12	113733470	113733922	-1	ENSMUSG00000095565	Ighv2-9-1	403.788	3.26407	0.646383	3.50267	0.000460623	0.0338944	IG V gene	immunoglobulin heavy variable 2-9-1	647.261	381.232	478.379	313.7	25.9375	17.5708	19.6833	25.2424	149.576	114.826	111.405	92.7794	1746	896	903	603	45	24	27	31	210	158	173	160	1730.89	797.972	850	631.707	40.5972	26.6599	29.8875	33.1282	222.755	169.188	185.14	127.532
6	29917011	29959680	1	ENSMUSG00000039629	Strip2	13.5851	3.32395	0.663974	3.50006	0.000465159	0.0340314	protein coding	striatin interacting protein 2	0.697809	1.18993	0.548378	0.388975	0.034347	0.155328	0.218841	0.243954	0.106554	0	0.022431	0.085909	47	65	25	18	1	6	6	5	3	0	1	3	41.2744	55.0902	21.5518	17.3252	1.18909	5.21282	7.34983	7.08161	3.50986	0	0.824398	2.61193
X	19925799	19963760	1	ENSMUSG00000037347	Chst7	11.6671	2.96136	0.560942	3.49654	0.000471338	0.0342864	protein coding	carbohydrate (N-acetylglucosamino) sulfotransferase 7	0.750407	1.43629	1.06698	1.3684	0.298211	0.393555	0.065137	0.352826	0.244547	0.189868	0	0.153502	24	39	24	31	6	6	1	5	4	3	0	3	23.1324	34.6557	21.8543	31.765	5.38055	6.88351	1.14015	5.33783	4.1982	3.22491	0	2.4323
12	114843508	114843941	-1	ENSMUSG00000094051	Ighv1-36	97.1954	4.05146	0.875718	3.48452	0.000493028	0.0353744	IG V gene	immunoglobulin heavy variable 1-36	212.905	192.016	41.4481	50.4039	3.80381	2.40983	5.68785	3.58374	40.7606	19.5965	1.41523	16.5497	521	410	71	88	6	3	7	4	52	25	2	26	517.1	364.702	66.884	92.1587	5.40703	3.32068	7.8436	4.27148	55.1284	26.733	2.13569	20.66
1	172302925	172306142	1	ENSMUSG00000026548	Slamf9	27.1567	2.98675	0.57026	3.48394	0.000494092	0.0353744	protein coding	SLAM family member 9	7.65353	6.13029	3.06616	1.04009	0.719711	0.591349	0.234977	1.53064	0.885551	1.48736	0.513334	1.10852	135	92	38	13	8	5	2	12	8	13	5	12	130.479	81.8033	34.7322	13.3525	7.18151	5.72009	2.27463	12.8066	8.40753	13.9713	5.43787	9.71407
13	94337818	94422365	-1	ENSMUSG00000021687	Scamp1	18.1848	2.89745	0.544672	3.48365	0.00049463	0.0353744	protein coding	secretory carrier membrane protein 1	0.846692	1.36173	0.630468	1.92872	0.146983	0.097224	0.302499	0.06962	0.361534	0.374629	0.068062	0.371295	55	75	19	22	6	3	6	2	12	12	1	8	38.7192	48.7421	19.1568	66.4174	3.93412	2.52262	7.85469	1.56249	9.20718	9.43939	1.93399	8.7277
8	96078896	96101708	1	ENSMUSG00000031790	Mmp15	12.8676	4.05681	0.879089	3.47725	0.000506594	0.0360276	protein coding	matrix metallopeptidase 15	0.733905	1.01427	2.17391	0.178689	0.040279	0.13327	0.10585	0.057244	0	0	0.069284	0.895947	58	26	13	10	2	5	4	2	0	0	3	2	29.8395	32.2786	58.7287	5.47094	0.95853	3.07442	2.4437	1.14225	0	0	1.7504	18.7245
5	32894574	32984453	-1	ENSMUSG00000093574	Gm20671	5.88936	6.54351	1.59649	3.47231	0.000515993	0.0360912	protein coding	predicted gene 20671	0.482993	1.87876	0	1.36681	0	0	0	0	0	0	0	0	12	39	0	24	0	0	0	0	0	0	0	0	11.5483	34.5735	0	24.5505	0	0	0	0	0	0	0	0
16	16948002	16950247	-1	ENSMUSG00000022769	Sdf2l1	368.197	2.20634	0.347403	3.47246	0.000515718	0.0360912	protein coding	stromal cell-derived factor 2-like 1	87.3406	66.5347	59.2571	57.437	14.5881	13.9203	8.93232	13.7793	45.1524	28.794	21.6619	26.1792	1253	813	597	584	132	96	62	88	332	205	172	231	1212.61	723.04	546.641	600.493	118.544	109.656	70.4163	93.8883	349.108	220.266	186.874	186.826
17	84159104	84161847	-1	ENSMUSG00000097254	C430042M11Rik	24.9925	2.13322	0.326189	3.47413	0.000512518	0.0360912	lncRNA	RIKEN cDNA C430042M11 gene	3.11617	3.65813	3.29171	2.42979	0.815324	0.74302	1.06556	1.40067	1.41701	1.07684	0.744793	1.01499	67	65	51	37	10	8	10	14	16	12	8	14	64.2115	59.0011	45.0684	37.7027	9.83331	8.68704	12.4673	14.1647	16.2607	12.2259	9.53622	10.7506
6	70640259	70640879	1	ENSMUSG00000095335	Igkv3-5	317.293	2.89456	0.546633	3.46587	0.000528514	0.0365651	IG V gene	immunoglobulin kappa chain variable 3-5	553.373	142.785	266.299	278.707	43.7994	35.326	39.7661	23.2357	146.691	67.2748	48.6059	105.95	1595	358	537	572	81	51	58	30	220	99	80	195	1578.67	318.859	504.672	598.638	73.0866	56.7519	64.3146	32.042	233.235	106.047	85.6579	155.535
6	66873381	66998334	1	ENSMUSG00000036402	Gng12	89.2736	1.91334	0.263497	3.46623	0.000527815	0.0365651	protein coding	guanine nucleotide binding protein (G protein), gamma 12	9.04066	9.2578	9.84276	10.8552	2.68573	2.75731	2.82337	2.4692	4.94795	5.79958	4.2447	3.97866	199	157	124	110	47	38	34	39	51	79	48	69	203.527	163.132	147.231	184.023	35.3885	35.2199	36.0907	27.2809	62.0331	71.9383	59.3771	46.0403
6	69019956	69020489	-1	ENSMUSG00000076541	Igkv4-79	20.249	3.10984	0.609933	3.45914	0.000541898	0.0371793	IG V gene	immunoglobulin kappa variable 4-79	7.07623	58.4809	24.7124	11.5757	5.49283	4.64495	3.08295	1.72551	6.03648	1.53885	6.81592	2.45396	18	130	44	21	9	6	4	2	8	2	10	4	17.8706	115.788	41.4679	22.0141	8.11921	6.65578	4.4209	2.13864	8.48982	2.1413	10.6958	3.18556
18	77877614	77970579	1	ENSMUSG00000025429	Pstpip2	177.091	3.10472	0.609572	3.45278	0.000554833	0.0371793	protein coding	proline-serine-threonine phosphatase-interacting protein 2	12.0022	24.4434	18.3134	20.4626	1.85232	0.891181	1.01141	1.23256	4.62717	9.39392	1.54551	4.22061	320	684	348	465	26	14	16	18	78	136	28	85	352.468	561.861	357.344	452.513	31.8384	14.8492	16.8652	17.7642	75.6743	152.001	28.202	63.7105
12	77284899	77523112	1	ENSMUSG00000021065	Fut8	546.655	2.0896	0.315206	3.45677	0.000546692	0.0371793	protein coding	fucosyltransferase 8	39.2799	36.7013	30.6195	35.6949	8.17661	7.39224	4.8914	9.58095	20.5401	20.3905	11.1094	15.7337	1682	1266	903	1062	207	134	97	160	418	414	229	380	1521.48	1112.73	788.051	1041.16	185.374	162.463	107.581	182.132	443.072	435.178	267.384	313.262
4	47474658	47483242	1	ENSMUSG00000053317	Sec61b	404.69	1.79901	0.231337	3.45386	0.000552628	0.0371793	protein coding	Sec61 beta subunit	181.954	170.757	170.657	173.907	50.9959	60.5126	55.9836	58.2892	113.349	107.886	51.0023	83.6034	1024	820	673	696	183	167	156	148	330	306	162	295	1002.1	736.1	624.497	721.236	164.384	189.092	175.071	157.549	347.65	327.393	174.536	236.674
18	65933586	65950755	1	ENSMUSG00000024516	Sec11c	2232.09	1.77291	0.223853	3.45274	0.000554916	0.0371793	protein coding	SEC11 homolog C, signal peptidase complex subunit	488.451	408.987	354.635	351.571	135.583	125.491	112.067	155.831	245.896	231.517	165.73	210.022	5413	4037	2915	3017	1275	900	814	1082	1684	1490	1279	1788	6304.96	4132.19	3041.6	3417.33	1024.34	919.078	821.379	987.179	1767.62	1646.59	1329.27	1393.5
8	4727539	4728365	-1	ENSMUSG00000048484	Gm7461	10.4105	-3.99905	0.867644	-3.45654	0.000547158	0.0371793	TEC	predicted gene 7461	0	0.238129	0.144975	0.143407	1.76962	1.68059	3.54968	6.14386	2.77254	3.26629	1.82698	2.30214	0	2	1	1	11	8	17	27	14	16	10	14	0	1.78114	0.920512	1.03195	9.89772	9.11207	19.2606	28.8136	14.7547	17.1978	10.8482	11.308
6	70148793	70149254	-1	ENSMUSG00000076580	Igkv8-27	337.523	3.71464	0.786567	3.45125	0.000558006	0.0371906	IG V gene	immunoglobulin kappa chain variable 8-27	937.824	131.072	253.923	243.232	15.7008	16.0906	16.0206	17.0726	164.549	62.431	44.517	44.3224	2351	294	457	446	26	21	21	20	198	82	66	73	2367.26	258.967	425.879	462.336	23.1967	23.045	22.9618	21.1497	231.312	86.8293	69.8232	57.5078
2	129434755	129474148	1	ENSMUSG00000037902	Sirpa	280.074	2.31226	0.383386	3.42282	0.00061974	0.0410901	protein coding	signal-regulatory protein alpha	29.55	18.3788	18.8951	15.6166	8.04831	1.76432	3.49377	3.17202	8.41618	6.4005	9.13519	8.23381	1152	691	537	518	185	26	44	41	228	111	170	156	1038.58	505.605	441.258	413.315	165.564	35.1837	69.7242	54.7141	164.731	123.948	199.504	148.752
5	8848147	8916315	1	ENSMUSG00000028970	Abcb1b	138.714	1.94485	0.276385	3.4186	0.000629438	0.0415168	protein coding	ATP-binding cassette, sub-family B (MDR/TAP), member 1B	8.74486	7.84904	8.183	6.51975	2.66837	2.7872	1.69209	2.03464	3.34306	3.10193	5.29318	2.86989	493	371	301	219	96	50	43	27	98	77	46	90	376.597	264.469	233.856	211.074	67.1173	67.6215	40.9302	42.9598	79.9812	73.9848	142.562	63.4206
15	77631998	77641203	-1	ENSMUSG00000056656	Apol8	21.7174	-3.01503	0.591469	-3.40682	0.00065724	0.0431272	protein coding	apolipoprotein L 8	0.12541	0.118233	0.249583	0	1.95613	1.11279	1.00452	2.61013	1.12839	0.536466	1.87278	1.06497	5	4	7	0	50	22	20	48	23	11	41	27	4.91729	3.62862	6.5023	0	44.892	24.7565	22.3644	50.2269	24.6393	11.5898	45.6278	21.464
12	113589126	113589576	-1	ENSMUSG00000094951	Ighv5-6	441.606	3.86178	0.842732	3.39584	0.000684182	0.0446648	IG V gene	immunoglobulin heavy variable 5-6	274.408	1439.48	209.569	470.555	24.4555	14.306	21.3612	7.08987	123.282	193.651	32.8998	52.2726	679	3110	363	831	39	18	27	8	159	245	47	83	674.631	2770.04	342.337	871.321	35.1903	19.9558	29.8194	8.55432	168.789	262.32	50.2587	66.0575
5	144160543	144162338	1	ENSMUSG00000104662	Gm43267	19.2266	-2.64	0.485094	-3.38078	0.0007228	0.0469451	TEC	predicted gene 43267	0.078749	0.046346	0.448023	0.389069	1.62644	2.06135	2.21105	2.48572	2.00082	1.99061	1.14439	2.31648	2	1	8	7	26	25	27	28	26	25	16	36	1.92969	0.888922	7.29457	7.17927	23.327	28.6598	30.7641	29.8932	27.304	26.8763	17.4246	29.1775
7	80285765	80294132	1	ENSMUSG00000084821	Gm15880	16.8778	-2.97786	0.585607	-3.37745	0.000731602	0.0472756	lncRNA	predicted gene 15880	0	0.164948	0.165772	0.065866	0.779034	1.32345	1.16812	1.10652	0.775671	0.708859	0.63736	1.91109	0	6	5	2	21	27	24	21	17	15	15	50	0	5.33329	4.54996	2.04887	18.8353	31.0189	27.3987	22.4325	17.8439	16.1339	16.3596	40.5785
5	21577640	21583372	1	ENSMUSG00000039899	Fgl2	276.058	3.22112	0.658113	3.37498	0.000738221	0.0473194	protein coding	fibrinogen-like protein 2	25.787	13.0263	8.27011	10.481	3.88115	0.733266	1.16487	0.630224	6.03487	3.42661	1.20741	1.80057	1480	634	334	426	140	20	32	16	177	97	38	63	1424.84	563.378	303.625	436.097	125.518	22.9884	36.5469	17.09	185.7	104.321	41.4546	51.1393
6	37304190	37419081	-1	ENSMUSG00000038648	Creb3l2	801.915	2.90749	0.56528	3.37442	0.000739714	0.0473194	protein coding	cAMP responsive element binding protein 3-like 2	32.777	21.6744	18.0456	18.1167	3.131	1.49074	1.10048	2.17469	8.5331	8.73955	3.67577	7.51844	3452	1966	1378	1415	154	78	58	106	457	475	222	444	3304.09	1710.16	1208.68	1375.22	184.733	85.2638	62.9899	107.587	479.032	485.414	230.239	389.572
15	88703849	88710886	1	ENSMUSG00000023272	Creld2	1358.98	2.91792	0.568953	3.37096	0.000749067	0.0476062	protein coding	cysteine-rich with EGF-like domains 2	292.911	237.025	158.78	183.03	22.4893	14.224	16.1481	24.1004	103.712	85.4867	31.3553	47.5196	5416	3728	2063	2398	262	126	144	198	982	783	320	539	5233.27	3314.67	1884.91	2462.48	235.175	144.191	163.819	211.32	1031.91	841.544	348.094	436.403
2	13655832	13798875	-1	ENSMUSG00000003418	St8sia6	681.388	1.82954	0.246155	3.37	0.000751677	0.0476062	protein coding	ST8 alpha-N-acetyl-neuraminide alpha-2,8-sialyltransferase 6	17.728	18.9855	19.0213	23.831	8.31248	3.75895	8.12983	8.53627	10.8589	7.03212	4.60816	13.604	1633	1322	1225	1059	393	212	311	253	522	412	300	493	1467.84	1230.42	1046.45	1485.85	402.837	176.591	382.215	346.871	500.707	320.81	237.081	578.983
3	105722856	105724673	1	ENSMUSG00000104835	Gm5547	36.5357	3.13266	0.633644	3.36571	0.000763458	0.0478759	lncRNA	predicted gene 5547	26.5493	22.9782	13.9138	14.6478	3.82487	1.80413	0.813317	0.296263	6.51717	5.55647	0.712411	7.60042	138	98	47	56	14	4	3	1	16	16	3	24	146.01	98.9138	50.8435	60.6618	12.3119	5.62961	2.53978	0.799627	19.9602	16.8372	2.43451	21.4856
10	95221224	95253042	-1	ENSMUSG00000020027	Socs2	31.3183	2.75032	0.519986	3.36609	0.000762406	0.0478759	protein coding	suppressor of cytokine signaling 2	2.82066	5.51736	1.48867	1.87182	0.524038	0.567689	0.865799	0.796419	0.151275	0.920114	1.0605	0.329262	92	59	39	43	11	14	7	10	5	15	13	9	84.9849	130.069	29.7913	42.7061	9.23793	9.70115	14.8066	11.7721	2.53732	15.2692	19.8469	5.09744
6	128911344	128961670	1	ENSMUSG00000000248	Clec2g	21.1789	3.95198	0.877505	3.36407	0.000768027	0.0479264	protein coding	C-type lectin domain family 2, member g	3.23475	3.06747	2.52967	2.07719	0.045215	0.119394	0.059281	0	1.61368	0.451383	0	0.139685	74	54	48	36	1	2	1	0	10	5	0	3	80.3792	59.6614	41.7663	38.8678	0.657605	1.68332	0.836413	0	22.3304	6.18002	0	1.78415
6	68745539	68746087	-1	ENSMUSG00000076532	Igkv4-91	490.057	3.61571	0.778811	3.3586	0.000783394	0.0486469	IG V gene	immunoglobulin kappa chain variable 4-91	1296.92	424.446	211.179	308.686	38.4498	33.2888	16.1855	21.5689	92.8109	249.294	78.3831	53.9872	3299	942	376	560	63	43	21	25	123	324	115	88	3275.28	839.019	354.362	587.042	56.8344	47.6998	23.2097	26.733	130.531	346.89	123.002	70.0823
5	96521814	96932587	1	ENSMUSG00000034687	Fras1	57.3973	2.92572	0.574567	3.3516	0.00080346	0.0496507	protein coding	Fraser extracellular matrix complex subunit 1	1.42156	1.13264	0.853079	0.599973	0.076105	0.203673	0.602544	0	0.280757	0.145566	0.167435	0.274991	263	164	96	99	12	9	7	0	36	18	23	42	227.127	141.647	90.563	72.1851	7.11699	18.4635	54.6633	0	24.981	12.8146	16.6226	22.584
6	88061464	88082286	1	ENSMUSG00000030062	Rpn1	1944.22	1.80372	0.24114	3.33301	0.000859113	0.0528334	protein coding	ribophorin I	103.98	88.5175	84.2552	97.3893	28.5442	26.0894	29.0992	28.0067	61.8632	57.4802	37.2442	43.3453	5635	3945	3074	3650	903	612	661	612	1636	1433	1010	1364	5097.47	3396.6	2744.48	3595.25	819.032	725.686	810.013	673.826	1688.94	1552.62	1134.52	1092.26
19	11644824	11668514	-1	ENSMUSG00000041857	Oosp1	66.2714	4.19512	0.959416	3.33028	0.000867588	0.0530878	protein coding	oocyte secreted protein 1	32.8972	17.9061	14.2719	11.0247	1.53734	0	0	0.18442	3.52677	2.75094	1.92695	2.66795	376	165	118	85	10	0	0	1	22	15	13	20	364.692	155.374	105.126	92.0339	9.97506	0	0	1.00336	21.7731	16.8031	13.2735	15.2028
13	112600604	112646620	1	ENSMUSG00000021756	Il6st	401.033	1.72641	0.218293	3.32767	0.000875761	0.0530878	protein coding	interleukin 6 signal transducer	11.6556	9.51239	10.2777	12.9723	3.58534	3.4429	2.94997	5.71296	5.77137	5.72278	4.55254	7.44078	1001	738	748	797	196	154	121	148	261	254	257	375	979.757	625.87	574.034	821.137	176.398	164.206	140.802	235.682	270.172	265.053	237.787	321.5
7	43959677	44009996	1	ENSMUSG00000038738	Shank1	515.61	-1.60065	0.18048	-3.32806	0.000874538	0.0530878	protein coding	SH3 and multiple ankyrin repeat domains 1	3.86897	5.24698	5.08642	3.80776	16.6917	27.6374	21.8821	23.4795	19.838	16.056	14.7765	15.1267	196	319	272	226	640	776	599	674	591	546	556	507	238.258	252.914	208.125	176.577	601.632	965.673	765.151	709.613	680.342	544.791	565.425	478.823
12	114528198	114528632	-1	ENSMUSG00000076688	Ighv15-2	49.8265	3.57145	0.77378	3.32323	0.000889801	0.0536833	IG V gene	immunoglobulin heavy variable V15-2	98.0797	19.7956	141.233	0.56326	7.48374	5.53393	6.39663	4.40728	1.56771	7.10776	11.836	18.1677	244	43	246	1	12	7	8	5	2	9	17	29	241.693	38.1823	231.248	1.04522	10.794	7.73746	8.95036	5.33011	2.15143	9.65068	18.1234	23.0124
3	79548918	79645187	-1	ENSMUSG00000034009	Rxfp1	31.4477	-2.34935	0.406585	-3.31873	0.000904273	0.054299	protein coding	relaxin/insulin-like family peptide receptor 1	0.142618	0.072261	0.192773	0.20569	0.924753	0.828893	0.655218	0.878885	1.40572	1.92842	1.06462	1.13281	11	5	11	12	43	20	26	32	43	53	45	55	9.99206	3.96271	8.97403	10.8519	37.9216	32.9503	26.0659	30.22	54.8475	74.443	46.3473	40.7961
12	113958089	113958518	-1	ENSMUSG00000095583	Ighv14-2	260.133	2.90543	0.574398	3.31726	0.000909034	0.0543287	IG V gene	immunoglobulin heavy variable 14-2	283.365	481.404	207.586	285.97	33.6004	28.9179	24.787	18.1737	120.714	103.085	34.6732	127.942	693	1029	356	499	53	36	31	20	154	129	49	201	688.741	916.466	335.815	523.287	47.8265	39.9019	34.2274	21.3862	163.485	138.128	52.395	159.933
6	69552959	69553484	-1	ENSMUSG00000076556	Igkv4-57	115.701	2.60699	0.486489	3.30324	0.000955744	0.0568534	IG V gene	immunoglobulin kappa variable 4-57	118.259	182.664	109.374	124.149	11.3492	19.9753	5.85438	31.1867	64.7064	73.6666	15.512	34.1894	291	393	188	218	18	25	7	35	83	93	22	54	289.166	350.032	177.322	228.595	16.2426	27.713	7.72983	37.4248	88.1119	99.578	23.5248	42.9715
8	72141858	72143219	1	ENSMUSG00000079019	Insl3	20.0511	-4.60856	1.09337	-3.30039	0.00096549	0.057166	protein coding	insulin-like 3	0.773662	0	0	0	2.59917	7.95505	7.38228	18.3198	0	4.92391	14.3236	10.867	5	0	0	0	11	26	24	54	0	16	53	45	4.90196	0	0	0	9.95423	29.5673	27.1685	57.8392	0	17.2621	57.5421	36.3774
14	34132691	34225298	-1	ENSMUSG00000021796	Bmpr1a	45.4118	3.32317	0.706742	3.28716	0.00101205	0.0593703	protein coding	bone morphogenetic protein receptor, type 1A	4.31715	2.53708	0.918384	0.520676	0.406849	0.45703	0.090747	0	0.424559	0.616084	0.415771	0.118896	132	159	30	34	8	20	4	0	20	28	21	3	268.88	123.682	38.0053	24.4198	14.831	16.1505	3.20922	0	14.7257	21.1418	16.0903	3.80632
16	19079151	19079609	-1	ENSMUSG00000076940	Iglv2	252.315	3.04573	0.622276	3.28749	0.00101085	0.0593703	IG V gene	immunoglobulin lambda variable 2	305.592	222.887	389.4	248.262	15.8026	22.2956	22.9397	15.7143	29.8355	138.569	93.1946	59.9594	811	516	723	470	27	30	31	19	41	188	142	102	804.307	459.503	681.264	492.281	24.3509	33.3046	34.2925	20.3041	43.4834	201.256	152.169	81.2643
6	68681492	68681962	-1	ENSMUSG00000096490	Igkv10-94	509.969	3.57877	0.787725	3.2737	0.0010615	0.0615882	IG V gene	immunoglobulin kappa variable 10-94	830.013	1336.34	278.127	189.218	42.1225	43.8357	28.8249	34.8098	37.6617	353.204	63.1598	61.7545	1986	2794	466	323	65	53	35	38	47	432	87	95	1974.92	2488.51	439.741	338.85	58.6509	58.7181	38.6233	40.641	49.895	462.485	93.0234	75.5715
6	70434485	70435020	-1	ENSMUSG00000076594	Igkv6-13	224.16	3.44038	0.745623	3.27294	0.00106437	0.0615882	IG V gene	immunoglobulin kappa variable 6-13	129.788	23.0473	302.295	725.18	13.9627	21.5647	27.6046	22.3128	45.7828	13.7768	80.6849	67.0301	332	51	541	1323	23	28	36	26	61	18	119	110	329.56	45.4236	509.812	1386.82	20.7484	31.0641	39.7945	27.8017	64.7314	19.2719	127.285	87.6126
6	145803969	145811284	-1	ENSMUSG00000030256	Bhlhe41	547.624	2.43017	0.436659	3.27524	0.00105571	0.0615882	protein coding	basic helix-loop-helix family, member e41	27.9938	32.4454	16.5427	25.0871	7.32654	4.0175	4.33736	3.35219	12.5364	13.2975	3.99028	6.73221	1795	1525	791	1038	265	124	89	97	318	324	163	316	1610.92	1461.42	632.523	1087.11	246.768	131.174	141.723	94.6715	401.752	421.621	142.68	199.135
7	84234367	84255930	-1	ENSMUSG00000030630	Fah	62.7015	2.5654	0.479244	3.2664	0.00108925	0.0627429	protein coding	fumarylacetoacetate hydrolase	9.72378	10.5308	7.30251	6.54175	2.52557	1.1403	0.569022	0.7166	2.84081	5.50926	1.3192	2.07702	214	197	99	102	35	12	4	7	32	60	16	28	197.474	167.397	98.5383	100.042	30.0202	13.1394	6.56159	7.14219	32.1286	61.6466	16.6469	21.6818
6	69835404	69835868	-1	ENSMUSG00000095007	Igkv12-41	108.797	2.62675	0.498272	3.26478	0.0010955	0.0628188	IG V gene	immunoglobulin kappa chain variable 12-41	116.727	30.534	338.284	65.2011	30.216	36.104	29.7726	24.0012	66.4009	12.313	23.8702	17.277	279	64	567	111	47	44	36	26	83	15	33	27	277.443	57.0025	535.05	116.447	42.4091	48.7471	39.7268	27.807	88.1125	16.0585	35.2847	21.4782
2	119067843	119080008	1	ENSMUSG00000027315	Spint1	3.72175	5.46525	1.37324	3.25162	0.00114749	0.0632361	protein coding	serine protease inhibitor, Kunitz type 1	0.393239	0.463216	0.052139	0.983324	0	0.076819	0	0	0	0	0	0	13	13	1	19	0	1	0	0	0	0	0	0	11.1542	10.2843	0.982658	21.0035	0	1.23632	0	0	0	0	0	0
9	95634695	95727364	-1	ENSMUSG00000049493	Pls1	87.3514	4.1702	0.974815	3.25211	0.00114553	0.0632361	protein coding	plastin 1 (I-isoform)	16.6543	4.40961	7.56302	3.70505	1.06866	0.075085	0.074551	0	1.78695	1.15758	0.986504	0.409729	458	139	169	108	9	2	2	0	17	32	16	14	561.545	116.378	169.439	94.0729	21.0901	1.43645	1.4273	0	33.5542	21.5056	20.6684	7.10123
5	71727092	71815651	-1	ENSMUSG00000029211	Gabra4	15.4024	3.86752	0.879273	3.26124	0.00110925	0.0632361	protein coding	gamma-aminobutyric acid (GABA) A receptor, subunit alpha 4	2.15789	0.660091	0.454487	0.586118	0	0.244935	0.249657	0.071099	0.125181	0.194566	0	0	133	35	20	20	0	4	4	1	4	6	0	0	101.994	24.4206	14.2732	20.8613	0	6.5686	6.70027	1.64924	3.29502	5.067	0	0
1	45947228	45965683	-1	ENSMUSG00000025993	Slc40a1	17.8613	3.83958	0.872203	3.25564	0.00113138	0.0632361	protein coding	solute carrier family 40 (iron-regulated transporter), member 1	0.355175	4.22537	1.59849	0.362204	0	0.446846	0.140138	0.120409	0.038607	0.165872	0.220005	0	18	13	57	13	0	12	4	3	1	4	5	0	13.4997	125.706	40.3692	10.3669	0	9.63651	3.02443	2.24605	0.817197	3.47373	5.19593	0
6	54406588	54480753	1	ENSMUSG00000086040	Wipf3	124.089	3.34686	0.719826	3.26031	0.00111289	0.0632361	protein coding	WAS/WASL interacting protein family, member 3	8.4017	7.69028	4.30871	5.86317	1.16271	1.0405	0.167357	0.057504	0.368279	2.68425	0.966212	1.11572	548	421	198	266	47	25	5	1	13	82	28	43	482.083	345.388	164.271	253.338	39.0487	33.8749	5.45261	1.61931	11.7681	84.863	34.449	32.907
6	70584421	70585020	1	ENSMUSG00000076598	Igkv3-7	179.983	3.02868	0.622743	3.25765	0.00112339	0.0632361	IG V gene	immunoglobulin kappa variable 3-7	28.9581	317.244	384.584	207.318	16.1358	21.5647	50.1995	24.8874	92.3162	31.3804	49.606	13.8574	74	671	657	378	27	28	65	29	123	41	73	23	72.8466	624.809	643.649	392.946	24.1548	30.8064	71.255	30.7523	129.441	43.5329	77.4348	18.167
4	132980401	132990424	-1	ENSMUSG00000028860	Sytl1	8.42432	2.99289	0.612752	3.25237	0.00114448	0.0632361	protein coding	synaptotagmin-like 1	0.609609	1.27182	1.08045	0.818735	0.284921	0.25804	0	0.123898	0.280393	0.083076	0.149833	0.13426	17	31	22	17	5	3	0	2	4	1	3	2	16.7575	27.365	19.7343	16.9478	4.58417	4.02462	0	1.67148	4.29241	1.25828	2.55926	1.89707
7	30289106	30298334	-1	ENSMUSG00000006310	Zbtb32	105.777	2.82673	0.561685	3.25224	0.001145	0.0632361	protein coding	zinc finger and BTB domain containing 32	12.5079	21.9565	10.1764	9.21612	3.23316	0.83554	0.414919	0.719718	3.11953	7.8448	3.33639	2.28224	301	436	171	161	51	10	5	8	40	91	29	35	285.261	391.949	154.209	158.277	43.1581	10.812	5.37311	8.05562	39.6207	98.578	47.2806	26.7545
12	113551887	113552322	-1	ENSMUSG00000096464	Ighv2-2	334.93	2.60613	0.493805	3.25256	0.00114369	0.0632361	IG V gene	immunoglobulin heavy variable 2-2	562.149	403.928	332.043	184.195	44.1357	50.3378	59.651	42.5665	129.193	95.3527	153.335	149.869	1383	868	572	323	70	63	75	48	166	120	218	237	1374.28	773.098	539.511	338.698	63.1656	69.8368	82.8196	51.3255	176.224	128.488	233.11	188.597
15	76496583	76501584	-1	ENSMUSG00000063354	Slc39a4	50.2155	2.57188	0.484053	3.24734	0.00116491	0.0639194	protein coding	solute carrier family 39 (zinc transporter), member 4	6.73841	3.48533	3.19165	3.99158	1.4891	0.28252	0.490996	0.66562	1.81336	1.39294	0.551278	2.28237	249	115	90	104	19	4	7	12	35	28	9	23	207.98	84.2012	65.4544	92.7732	26.9009	4.9476	8.60495	10.0826	31.1692	23.6886	10.5727	36.2101
10	75609949	75617248	-1	ENSMUSG00000001665	Gstt3	26.1501	2.81241	0.559399	3.23993	0.0011956	0.0650429	protein coding	glutathione S-transferase, theta 3	4.42012	3.88085	2.11061	1.84726	0.408454	0.234986	0.439264	0.505905	1.29507	1.43688	0.712904	0.183364	82	80	36	35	5	3	6	6	18	19	9	3	105.307	72.3699	33.4108	33.1408	5.69564	3.17645	5.94226	5.91521	17.1827	18.8618	10.5536	2.2455
4	126503611	126508164	1	ENSMUSG00000073755	5730409E04Rik	27.1206	2.71299	0.5287	3.24	0.00119528	0.0650429	protein coding	RIKEN cDNA 5730409E04Rik gene	2.81175	1.93779	1.16755	1.33179	0.862585	0.148657	0.147611	0.213075	0.415154	0.716623	0.429554	0.347759	120	70	35	40	23	3	3	4	9	15	10	9	115.01	62.0407	31.7317	41.0212	20.6509	3.45005	3.42833	4.27732	9.4568	16.1507	10.9176	7.31167
12	52746166	53202382	1	ENSMUSG00000061603	Akap6	26.5118	3.27977	0.70654	3.22667	0.00125241	0.0678433	protein coding	A kinase (PRKA) anchor protein 6	0.772734	0.368982	0.232696	0.527674	0	0.161626	0.124792	0.057805	0.016664	0.164159	0.023332	0.047525	86	41	27	31	0	18	14	6	2	19	3	3	126.518	47.2868	25.3146	65.0582	0	15.0147	11.6016	4.64483	1.51946	14.8091	2.37373	3.99975
6	70217411	70217956	-1	ENSMUSG00000105432	Gm43218	9.02313	5.45128	1.38793	3.20714	0.00134064	0.0723148	IG V gene	predicted gene 43218	0	25.9371	6.97428	26.7824	0	0	0	1.60847	0	0	0	1.85957	0	53	11	45	0	0	0	2	0	0	0	3	0	46.7479	10.2842	46.7635	0	0	0	2.11869	0	0	0	2.36328
9	106715511	106769178	-1	ENSMUSG00000032575	Manf	1298.53	2.2267	0.38484	3.18757	0.00143476	0.0770652	protein coding	mesencephalic astrocyte-derived neurotrophic factor	354.419	280.959	220.548	227.041	73.9018	62.7808	48.9809	52.9776	148.206	147.821	50.8111	102.848	4102	2670	1968	1804	584	411	296	337	967	896	432	793	4338.47	2691.99	1793.83	2092.84	529.485	436.041	340.449	318.268	1010.33	997.006	386.481	647.133
3	65287076	65300044	-1	ENSMUSG00000027828	Ssr3	1212.37	1.62385	0.195899	3.18455	0.0014498	0.0775459	protein coding	signal sequence receptor, gamma	78.0795	70.3106	63.4875	56.1469	29.2089	24.4234	25.8512	27.6886	41.3107	43.812	25.978	36.3358	3355	2561	1915	1708	747	498	529	511	874	877	601	921	3166.25	2231.71	1710.62	1714.53	693.268	561.945	595.242	551.046	932.923	978.907	654.58	757.391
2	14234203	14336868	1	ENSMUSG00000026712	Mrc1	16.0638	3.04068	0.641742	3.17991	0.00147322	0.0781419	protein coding	mannose receptor, C type 1	0.530963	0.693656	1.52594	0.306743	0.057622	0.191652	0.34501	0.103056	0.141726	0.097926	0.132164	0	44	42	89	18	3	4	7	2	6	4	6	0	35.0189	35.8089	66.8705	15.2344	2.22434	7.17183	12.9204	3.33573	5.20551	3.5586	5.41625	0
X	154106914	154123750	-1	ENSMUSG00000025289	Prdx4	218.895	2.84121	0.57896	3.18021	0.00147169	0.0781419	protein coding	peroxiredoxin 4	82.7893	48.2917	33.8218	35.7071	3.40933	7.13774	5.33506	7.19767	21.1258	23.5574	4.03172	14.7223	1032	513	296	316	27	43	32	40	135	146	28	113	1000.42	456.763	271.559	324.92	24.1133	48.9384	36.6061	42.6856	142.167	156.848	30.2725	91.4453
7	24677592	24705383	-1	ENSMUSG00000040907	Atp1a3	17.9159	3.76768	0.871355	3.17629	0.00149172	0.0787855	protein coding	ATPase, Na+/K+ transporting, alpha 3 polypeptide	0.292937	2.27747	3.57364	0.929133	0	0.314007	0.155	1.19917	0.035765	0.113898	0.034146	0.061429	16	31	34	36	0	8	4	5	1	3	1	2	10.2573	62.4196	83.1436	24.4991	0	6.23848	3.08174	20.6072	0.697423	2.19744	0.742934	1.10563
6	69752734	69753328	-1	ENSMUSG00000094094	Igkv5-45	51.1573	2.74698	0.550209	3.17512	0.00149773	0.0787855	IG V gene	immunoglobulin kappa chain variable 5-45	55.6873	73.839	40.003	30.6496	6.04328	3.60794	2.07238	8.53232	11.1235	23.3316	24.5632	7.29524	163	188	82	64	11	5	3	11	17	35	41	14	161.283	167.445	77.0364	66.9632	9.92441	5.56589	3.32779	11.7475	18.0225	37.4931	43.9112	11.1679
4	134289001	134431601	-1	ENSMUSG00000037306	Man1c1	31.9808	2.51275	0.476951	3.17171	0.00151545	0.0793898	protein coding	mannosidase, alpha, class 1C, member 1	2.51785	1.68798	1.39321	0.8108	0.380656	0.343661	0.159857	0.2204	0.658636	0.434281	0.311011	0.868889	155	91	59	32	14	8	5	4	19	14	7	27	133.5	70.0531	49.0824	32.3726	11.813	10.3386	4.81268	5.73512	19.4479	12.6871	10.2465	23.6806
11	115353300	115365224	1	ENSMUSG00000045775	Slc16a5	8.74015	4.1539	0.994804	3.17037	0.00152244	0.0794289	protein coding	solute carrier family 16 (monocarboxylic acid transporters), member 5	2.4101	2.2094	0.491227	0.81255	0	0.142717	0	0	0.263576	0.406507	0.489749	0	74	41	9	15	0	2	0	0	4	1	2	0	43.3296	31.091	5.86801	11.0005	0	1.45581	0	0	2.63895	4.02679	5.47107	0
6	125437229	125471754	-1	ENSMUSG00000030342	Cd9	138.27	2.09769	0.346844	3.1648	0.00155191	0.080636	protein coding	CD9 antigen	25.535	21.9473	22.1988	21.3793	10.3851	3.78179	3.53119	3.69803	12.7146	8.30413	8.56136	10.1566	414	304	253	245	105	25	27	26	106	67	77	100	393.017	264.404	227.02	247.789	93.5545	33.0258	30.8604	27.9335	108.981	70.4224	81.878	80.3526
6	67873156	67873626	1	ENSMUSG00000094345	Igkv14-126	583.678	3.79768	0.884415	3.16331	0.00155984	0.0807183	IG V gene	immunoglobulin kappa variable 14-126	450.52	519.518	1343.46	896.185	8.5444	5.41911	12.3318	22.4317	76.2106	212.622	139.726	148.465	1146	1153	2392	1626	14	7	16	26	101	276	205	242	1137.76	1026.95	2254.35	1704.52	12.6299	7.76508	17.6836	27.8023	107.184	295.499	219.264	192.726
12	105479739	105481505	1	ENSMUSG00000113535	AU015791	4.63583	4.61957	1.14595	3.15858	0.00158541	0.0817096	lncRNA	expressed sequence AU015791	0.400964	1.17883	1.06974	0.848865	0	0	0	0	0.097898	0.303682	0	0	8	20	15	12	0	0	0	0	1	3	0	0	7.70351	17.7273	13.6559	12.281	0	0	0	0	1.04744	3.21472	0	0
7	109721253	109742493	1	ENSMUSG00000031016	Wee1	85.7201	2.12042	0.355774	3.14924	0.00163697	0.0840269	protein coding	WEE 1 homolog 1 (S. pombe)	4.09977	4.261	5.08106	4.52692	1.29826	0.81735	0.811551	0.570887	1.97691	2.87509	1.77103	1.52933	211	186	184	165	42	20	20	13	52	73	50	48	203.177	165.287	167.313	168.94	37.6579	22.9828	22.8369	13.885	54.5606	78.5069	54.5369	38.9578
11	113135679	113540905	-1	ENSMUSG00000041654	Slc39a11	81.8328	2.26363	0.402784	3.13723	0.00170553	0.0871945	protein coding	solute carrier family 39 (metal ion transporter), member 11	5.68666	4.98209	10.0456	4.48629	0.970163	0.747532	1.74968	0.746331	2.53041	3.81022	1.65035	2.49087	205	125	167	125	24	14	33	13	52	74	36	60	200.833	137.721	235.73	119.31	20.054	14.9792	35.0867	12.9357	49.7674	74.143	36.2162	45.2176
4	89192708	89212890	-1	ENSMUSG00000044303	Cdkn2a	9.01766	3.82249	0.900976	3.13271	0.00173203	0.0881059	protein coding	cyclin dependent kinase inhibitor 2A	2.19667	4.54264	1.82619	2.87838	0	0	0.200781	0	1.07012	0.784923	0	0.296524	24	42	14	22	0	0	1	0	6	4	0	2	22.7948	36.8969	12.5914	22.4921	0	0	1.18304	0	6.18416	4.48786	0	1.58164
5	144127104	144131259	1	ENSMUSG00000052271	Bhlha15	173.46	3.13196	0.68074	3.13183	0.0017372	0.0881059	protein coding	basic helix-loop-helix family, member a15	16.0999	7.90207	8.58041	7.2115	0.513482	0.59905	1.22925	0.343299	4.42072	3.88708	1.17685	1.52559	848	353	318	269	17	15	31	8	119	101	34	49	816.525	313.687	289.142	275.412	15.2422	17.2381	35.3989	8.5447	124.857	108.62	37.0864	39.7706
16	10892775	10952514	-1	ENSMUSG00000022498	Txndc11	1034.22	1.5151	0.164552	3.1303	0.00174628	0.0882148	protein coding	thioredoxin domain containing 11	75.3144	73.0601	75.4002	75.2811	25.7224	34.3996	29.0175	41.4481	49.5353	47.3117	32.2195	43.5085	2635	1995	1545	1561	518	457	431	549	833	798	642	834	2298.15	1744.98	1528.73	1729.81	459.399	595.572	502.765	620.705	841.765	795.445	610.899	682.422
12	115705825	115706267	-1	ENSMUSG00000096577	Ighv1-71	191.901	4.39915	1.08785	3.12466	0.0017801	0.0891169	IG V gene	immunoglobulin heavy variable 1-71	49.6844	169.597	835.585	196.682	0	18.7133	14.0239	18.2002	30.4303	0	31.8672	38.4686	127	378	1496	359	0	24	13	21	41	0	47	45	117.918	314.909	1318.64	351.995	0	24.9054	18.7468	21.0038	40.6959	0	47.0231	46.9798
4	11156431	11174379	1	ENSMUSG00000028211	Trp53inp1	1979.31	1.76695	0.245517	3.12383	0.00178514	0.0891169	protein coding	transformation related protein 53 inducible nuclear protein 1	80.748	58.1629	59.7172	61.8245	22.6772	16.8964	21.6702	21.1642	40.4493	41.9249	24.2144	36.2663	6256	3649	3344	3393	959	609	678	700	1538	1453	920	1619	5684.83	3205.1	2793.47	3277.62	934.443	674.931	866.271	731.252	1585.89	1626.29	1059.27	1312.4
12	110556946	110559134	1	ENSMUSG00000113361	B930059L03Rik	10.1945	-4.41466	1.09252	-3.1255	0.00177503	0.0891169	lncRNA	RIKEN cDNA B930059L03 gene	0	0	0.134522	0	0.751934	1.9846	0.656947	0.427023	0.123325	0.765988	1.14731	1.08372	0	0	3	0	15	30	10	6	2	12	20	21	0	0	2.73443	0	13.464	34.4484	11.4117	6.41131	2.10107	12.9116	21.8095	17.0416
15	66542602	66722570	1	ENSMUSG00000053469	Tg	30.7161	3.01677	0.649179	3.10665	0.00189223	0.093728	protein coding	thyroglobulin	2.89104	4.57586	3.67228	5.77629	0.85546	0.047804	0.591181	0.122939	1.75436	1.08777	0.54217	1.17082	57	65	44	64	9	3	7	3	15	9	5	12	63.8045	79.0458	53.8505	95.9968	11.0503	0.59861	7.40832	1.33158	21.5621	13.2273	7.435	13.282
10	128158328	128163422	1	ENSMUSG00000025381	Cnpy2	222.776	2.08464	0.349075	3.10718	0.00188883	0.093728	protein coding	canopy FGF signaling regulator 2	64.9144	49.3348	45.1239	40.4266	17.1147	8.98853	10.132	8.09597	32.2525	24.7869	15.0371	22.3509	757	452	365	346	139	50	50	46	184	128	109	136	719.324	427.905	332.238	337.337	111.002	56.5135	63.7505	44.0284	199.032	151.338	103.537	127.308
11	120526538	120534595	-1	ENSMUSG00000025140	Pycr1	52.9923	3.12215	0.6839	3.10301	0.00191561	0.0945184	protein coding	pyrroline-5-carboxylate reductase 1	14.6714	10.1872	8.71438	9.56739	1.78243	2.29217	0	1.91062	3.12338	1.26486	0	4.89397	345	153	109	95	6	14	0	14	31	18	0	27	212.65	115.573	83.9246	104.424	15.1211	18.8504	0	13.5909	25.2112	10.1013	0	36.4614
6	67919058	67919524	-1	ENSMUSG00000096632	Igkv9-124	170.008	2.98293	0.639276	3.10184	0.0019232	0.0945265	IG V gene	immunoglobulin kappa chain variable 9-124	462.421	65.2286	234.285	93.7743	12.1585	39.3821	25.8547	47.3385	110.101	41.6795	25.2767	40.254	987	115	389	166	19	45	27	45	142	43	30	56	1017.57	112.051	342.903	155.792	15.3452	49.1709	31.8197	50.6985	134.926	50.2312	34.4028	45.1806
5	91665474	91774753	1	ENSMUSG00000034981	Parm1	43.9455	2.82757	0.590129	3.0969	0.00195556	0.0957473	protein coding	prostate androgen-regulated mucin-like protein 1	1.6805	2.76936	0.984259	1.30432	0.326675	0.378293	0.134134	0.029017	0.954154	0.572504	0.117065	0.252707	131	183	54	72	16	14	5	1	38	22	5	12	126.06	162.603	49.0578	73.6777	14.3428	16.1008	5.71327	1.06823	39.8597	23.6624	5.45651	9.74396
12	115875964	115876396	-1	ENSMUSG00000094075	Ighv1-80	882.372	2.86454	0.602593	3.09419	0.00197351	0.0962557	IG V gene	immunoglobulin heavy variable 1-80	980.614	1038.57	1617.75	726.896	88.1217	87.5571	82.3566	75.2585	217.128	695.219	215.115	224.694	2400	2220	2771	1269	139	109	103	84	277	870	304	353	2385.25	1977.22	2613.88	1330.76	125.432	120.814	113.723	89.8221	294.061	931.564	325.063	280.877
12	115832393	115832847	-1	ENSMUSG00000096326	Ighv1-78	2102.96	4.50613	1.13648	3.08507	0.00203505	0.0985144	IG V gene	immunoglobulin heavy variable 1-78	1889.38	8013.39	383.27	211.344	31.7252	60.1415	32.4075	33.7925	118.006	968.464	71.8173	44.7584	5284	19505	750	421	57	85	46	43	172	1380	102	68	5110.15	16964.7	688.776	430.445	50.2225	92.2931	49.7697	44.8554	178.095	1443.29	120.696	62.2254
11	76669250	76737844	-1	ENSMUSG00000020841	Cpd	184.98	3.30053	0.746251	3.08278	0.00205077	0.0985144	protein coding	carboxypeptidase D	6.85292	4.9228	4.1183	3.9788	1.27501	0.40752	0.202284	0.018225	1.687	0.898965	0.441293	1.03196	851	518	360	323	51	24	12	1	107	55	30	78	769.074	432.429	307.093	336.246	83.7499	25.9491	12.8902	1.00381	105.435	55.5874	30.773	59.5299
8	122607889	122634433	-1	ENSMUSG00000040010	Slc7a5	330.627	1.70875	0.229857	3.08344	0.00204624	0.0985144	protein coding	solute carrier family 7 (cationic amino acid transporter, y+ system), member 5	20.3457	15.2719	12.3254	13.7142	5.75899	5.80562	5.7132	7.00987	10.1449	8.33163	6.56522	6.61654	979	687	460	464	192	137	122	136	275	218	191	214	985.788	579.179	396.798	500.373	163.318	159.602	157.179	166.686	273.737	222.424	197.655	164.786
9	44290787	44303666	1	ENSMUSG00000032115	Hyou1	2153.38	1.60801	0.19716	3.08386	0.00204336	0.0985144	protein coding	hypoxia up-regulated 1	106.455	82.3938	76.6695	74.3145	33.6341	35.7897	35.0829	35.5732	49.9965	58.061	34.2398	46.3214	6223	4106	3115	3088	1310	918	941	933	1506	1659	1087	1714	5978.28	3621.72	2860.83	3142.66	1105.53	1140.38	1118.7	980.423	1563.6	1796.54	1194.79	1337.12
2	155222979	155231770	1	ENSMUSG00000038375	Trp53inp2	491.529	-1.69103	0.22439	-3.07957	0.00207298	0.0992069	protein coding	transformation related protein 53 inducible nuclear protein 2	7.34389	6.38142	16.0134	12.1562	51.5109	45.4755	45.4222	77.5054	42.5021	27.3307	35.9815	51.5896	226	163	306	256	732	462	489	770	542	393	510	718	180.851	123.005	262.021	225.426	742.456	635.406	635.137	936.711	582.88	370.839	550.583	653.032
15	74980007	74983819	-1	ENSMUSG00000022584	Ly6c2	218.422	3.79402	0.908423	3.07568	0.00210021	0.0997599	protein coding	lymphocyte antigen 6 complex, locus C2	102.865	88.8462	54.5645	40.5951	0.160646	2.99233	0.896637	2.43613	17.459	15.5689	12.5537	9.7836	807	599	295	217	4	15	3	16	71	81	50	58	984.563	665.661	347.011	292.591	0.89996	16.2504	4.873	11.4434	93.0788	82.1057	74.4296	48.1509
12	115122023	115122455	-1	ENSMUSG00000093894	Ighv1-53	1566.94	3.32808	0.7567	3.07663	0.00209357	0.0997599	IG V gene	immunoglobulin heavy variable 1-53	1995.11	2257.28	1933.36	1860.95	106.515	48.4534	47.8052	74.9875	265.58	846.284	284.946	658.684	4882	4824	3312	3250	168	60	60	84	339	1059	403	1035	4851.99	4296.44	3124.21	3408.18	151.601	66.5032	66.2466	89.8221	359.88	1133.94	430.922	823.535
3	27470311	27765456	-1	ENSMUSG00000039286	Fndc3b	243.227	2.73335	0.565024	3.06775	0.0021568	0.102067	protein coding	fibronectin type III domain containing 3B	13.4538	5.66212	8.45546	6.68821	1.60374	3.55623	0.40957	0.785784	3.72347	2.81581	1.19966	1.33057	1306	509	430	396	48	59	18	36	201	112	65	85	1056.46	348.014	441.168	395.486	73.7089	158.445	18.2617	30.2825	162.829	121.829	58.5348	53.7061
6	142767271	142910178	-1	ENSMUSG00000030283	St8sia1	12.6075	2.48271	0.483897	3.06411	0.0021832	0.102934	protein coding	ST8 alpha-N-acetyl-neuraminide alpha-2,8-sialyltransferase 1	0.214484	0.318157	0.448343	0.416268	0.079065	0.149613	0.089116	0.032114	0.125008	0.043201	0.077763	0.081598	17	38	9	15	7	10	6	2	9	3	6	7	22.2852	25.8747	30.9523	32.5694	4.80822	8.8201	5.25759	1.63758	7.23331	2.47318	5.02047	4.35794
1	85866039	85888729	-1	ENSMUSG00000049608	Gpr55	270.223	3.04323	0.671232	3.044	0.00233459	0.109665	protein coding	G protein-coupled receptor 55	20.1302	15.6365	11.1756	11.0542	2.4007	1.12052	0.630441	0.321029	4.48098	6.44207	2.07168	3.46488	1134	747	443	441	85	30	17	8	129	179	64	119	1091.77	663.794	402.73	451.465	76.2082	34.4812	19.4148	8.54493	135.342	192.509	69.8164	96.5942
X	100775141	100777875	-1	ENSMUSG00000050232	Cxcr3	83.8146	2.7118	0.562625	3.04252	0.00234607	0.109799	protein coding	chemokine (C-X-C motif) receptor 3	8.78742	13.0964	8.87795	10.4333	1.56552	1.03148	0.341487	0.462813	5.05552	5.81152	1.26766	2.48218	214	271	152	180	24	12	4	5	63	70	17	37	206.512	240.904	138.629	184.636	21.5338	13.7539	4.55683	5.33788	66.1645	75.2514	18.5112	29.9844
15	79400612	79411940	1	ENSMUSG00000010830	Kdelr3	7.40012	3.8844	0.94973	3.03708	0.00238885	0.111392	protein coding	KDEL (Lys-Asp-Glu-Leu) endoplasmic reticulum protein retention receptor 3	1.35325	1.77475	1.0369	1.0284	0	0	0.107966	0	0.203303	0.105096	0.565998	0	26	29	14	14	0	0	1	0	2	1	6	0	25.0883	25.7538	12.7729	14.3571	0	0	1.13654	0	2.099	1.07355	6.52016	0
2	56996842	57014015	-1	ENSMUSG00000026826	Nr4a2	41.1864	-2.37493	0.453632	-3.03094	0.00243794	0.113266	protein coding	nuclear receptor subfamily 4, group A, member 2	0.29118	0.283136	0.94224	0.164461	2.91287	0.957184	3.68256	2.37215	4.82139	2.91681	2.2471	2.85562	15	10	18	6	61	19	50	36	78	53	44	65	10.3369	7.86744	22.2253	4.39648	60.5241	19.2799	74.2308	41.3287	95.3183	57.0529	49.5679	52.1084
6	5220852	5256286	-1	ENSMUSG00000029759	Pon3	219.528	3.34874	0.777225	3.02196	0.00251146	0.116258	protein coding	paraoxonase 3	51.5944	42.6094	23.4023	22.9479	1.44308	1.4796	1.76162	0.634584	12.806	13.686	3.35461	6.24644	1267	895	376	361	18	10	5	5	134	161	50	91	965.736	624.269	291.053	323.453	15.8097	15.7138	18.7229	5.82941	133.489	141.148	39.0164	60.099
6	68233373	68233853	1	ENSMUSG00000095771	Igkv14-111	938.817	2.74002	0.576357	3.019	0.00253609	0.11655	IG V gene	immunoglobulin kappa variable 14-111	951.38	1826.18	968.193	311.75	107.754	103.007	87.9174	144.873	470.375	415.378	204.548	223.795	2553	4270	1818	596	186	140	120	177	657	569	316	384	2531.19	3802.98	1711.56	624.379	167.798	155.496	132.817	189.165	696.935	609.278	338.156	306.055
15	83183940	83234448	-1	ENSMUSG00000054277	Arfgap3	146.542	2.09634	0.363112	3.0193	0.00253358	0.11655	protein coding	ADP-ribosylation factor GTPase activating protein 3	15.0619	12.122	11.5375	6.47572	3.77094	2.78798	3.82407	1.26757	5.35333	6.81854	3.21717	3.93945	527	364	263	171	69	46	58	21	87	130	46	85	486.55	306.5	247.639	157.525	71.2978	51.0996	70.1421	20.0955	96.3047	121.361	64.576	65.4127
10	17598966	17601422	1	ENSMUSG00000039910	Cited2	463.831	1.80344	0.266454	3.01532	0.00256705	0.117549	protein coding	Cbp/p300-interacting transactivator, with Glu/Asp-rich carboxy-terminal domain, 2	77.9988	55.6635	38.9701	50.1042	19.6388	24.2495	20.201	16.6962	29.5441	30.4175	15.6949	35.4488	1643	997	709	704	216	150	162	150	330	286	250	377	1490.52	832.59	494.812	720.734	219.657	262.637	219.194	156.584	314.41	320.269	186.363	348.201
3	100358944	100396640	-1	ENSMUSG00000044468	Tent5c	1355.47	3.11452	0.702109	3.01167	0.00259815	0.118244	protein coding	terminal nucleotidyltransferase 5C	69.5184	46.8814	36.9743	37.4679	4.54827	2.94986	1.20026	1.76538	19.431	19.1359	6.59908	10.439	5823	3448	2247	2312	249	122	50	68	865	780	315	554	5777.74	3049.78	2041.82	2344.93	221.25	139.104	56.6418	72.0072	899.353	876.289	340.793	445.959
10	60182630	60208463	1	ENSMUSG00000020101	Vsir	245.273	1.96688	0.321078	3.01136	0.00260082	0.118244	protein coding	V-set immunoregulatory receptor	25.3825	21.3973	11.618	21.1601	5.4629	6.94916	4.56637	5.13399	6.34353	13.1424	10.6535	8.21218	1003	569	391	461	110	63	98	65	116	132	109	179	749.685	494.667	227.999	470.623	94.4377	116.454	76.5808	74.4181	104.34	213.875	195.517	124.675
3	63840928	63872189	-1	ENSMUSG00000027822	Slc33a1	174.476	1.73765	0.245092	3.00969	0.00261516	0.118473	protein coding	solute carrier family 33 (acetyl-CoA transporter), member 1	13.0652	7.94085	6.93196	9.64851	3.71137	4.5068	3.8685	3.76821	5.2287	4.90192	3.44469	4.17244	528	301	209	285	110	93	80	72	126	102	78	120	549.013	261.182	193.544	305.308	91.2806	107.452	92.3024	77.7107	122.359	113.494	89.9426	90.1227
16	22287211	22475971	-1	ENSMUSG00000022861	Dgkg	31.9151	2.68287	0.559575	3.0074	0.00263491	0.118945	protein coding	diacylglycerol kinase, gamma	3.20641	1.59219	2.18136	1.34123	0.050435	0.824908	0.712798	0.181238	0.850905	0.653145	0.139608	0.420712	161	61	74	44	1	21	18	3	20	13	3	11	135.84	52.7974	61.4036	42.7882	1.25059	19.8286	17.1466	3.76821	20.0754	15.2461	3.67509	9.16158
1	111786432	111792648	-1	ENSMUSG00000038702	Dsel	18.1989	3.10206	0.699455	3.00528	0.0026534	0.119356	protein coding	dermatan sulfate epimerase-like	1.27774	0.533493	0.44672	0.396452	0.232367	0.070984	0.281893	0.127025	0.065945	0	0.020501	0.147514	57	27	28	25	13	3	12	5	3	0	1	8	99.139	32.3996	23.03	23.1635	10.5524	3.12495	12.4191	4.83692	2.84944	0	0.988367	5.88318
7	67602575	67883416	1	ENSMUSG00000005533	Igf1r	113.844	2.1754	0.391307	3.00377	0.0026666	0.119528	protein coding	insulin-like growth factor I receptor	3.46118	2.91588	3.04297	2.29176	2.02542	1.27948	0.367436	1.03215	0.662969	1.28831	0.406548	0.672007	498	301	208	179	54	59	28	25	41	51	40	49	342.765	226.023	200.23	170.904	117.399	71.8929	20.6613	50.1643	36.563	70.2963	25.0169	34.2077
17	52064323	52068649	-1	ENSMUSG00000102212	C230085N15Rik	218.362	-1.80002	0.266454	-3.00246	0.00267804	0.119619	TEC	RIKEN cDNA C230085N15 gene	0.681292	1.44639	2.51707	2.24481	7.0832	10.8689	6.61397	14.0024	6.31121	7.15398	4.94407	8.89412	45	81	117	105	294	341	209	409	213	233	179	358	43.3131	71.9746	106.326	107.468	263.568	392.06	238.755	436.884	223.447	250.596	195.308	290.648
1	177057457	177058252	-1	ENSMUSG00000102427	Gm37463	12.7678	-2.91839	0.639207	-3.00119	0.00268923	0.119699	TEC	predicted gene, 37463	0.107104	0.125351	0.763608	0.453105	2.71015	2.43105	3.95439	5.7485	4.79616	1.934	2.11478	5.36432	1	1	5	3	16	11	18	24	23	9	11	31	0.971343	0.889824	4.60145	3.0944	14.3859	12.5095	20.3634	25.5859	24.2234	9.66415	11.9174	25.0068
2	19914591	20815524	1	ENSMUSG00000036617	Etl4	155.589	3.05819	0.688499	2.98938	0.00279542	0.123992	protein coding	enhancer trap locus 4	7.24163	9.40032	9.00358	5.26223	0.445087	0.516989	0.309969	0.18188	2.5034	3.46329	1.42006	1.6475	533	568	444	283	12	14	8	3	95	128	53	88	444.826	451.967	367.475	243.409	16.0021	18.0184	10.8113	5.48298	85.6367	117.215	54.2014	52.0184
6	70332836	70333429	1	ENSMUSG00000076589	Igkv8-18	14.6159	3.6376	0.882637	2.98831	0.0028052	0.123994	IG V gene	immunoglobulin kappa variable 8-18	2.60797	13.8825	37.7399	15.111	0.508258	2.59054	0.644852	1.43477	1.88267	7.69507	0	0	8	37	81	33	1	4	1	2	3	12	0	0	7.8789	32.828	75.7572	34.3773	0.898725	4.44052	1.10619	2.12729	3.16749	12.8091	0	0
12	115410029	115410489	-1	ENSMUSG00000096078	Ighv1-62-2	381.051	4.04999	1.02518	2.97508	0.00292913	0.129024	IG V gene	immunoglobulin heavy variable 1-62-2	214.485	322.027	586.938	957.432	18.7377	5.39734	18.76	16.7163	46.0554	176.523	0	67.1214	606	792	1160	1926	34	8	27	14	45	254	0	121	554.857	652.305	1008.56	1864.6	28.3678	8.22733	27.6689	21.54	65.6772	251.579	0	89.2261
1	85822002	85836396	1	ENSMUSG00000026223	Itm2c	198.292	2.26425	0.425355	2.97221	0.00295663	0.129786	protein coding	integral membrane protein 2C	26.9573	16.2633	13.5374	10.5115	4.84939	3.62973	3.0896	1.39456	7.12838	10.992	6.06588	4.80331	812	442	304	241	94	56	48	20	118	148	81	95	799.829	377.693	266.879	234.855	84.2143	61.1048	52.0509	20.3066	117.784	179.696	111.831	73.2554
6	72579987	72582485	-1	ENSMUSG00000108368	Gm45053	127.517	-1.68544	0.230734	-2.97068	0.00297146	0.129989	TEC	predicted gene 45053	1.41732	0.99555	2.51866	2.61677	10.2278	8.12654	8.01289	10.647	8.47574	6.07167	7.83962	8.03417	52	31	65	68	236	142	141	173	159	110	158	180	50.1114	27.5512	59.1692	69.6699	211.655	163.025	160.865	184.746	166.886	118.282	172.231	146.011
11	105858771	105880790	1	ENSMUSG00000020681	Ace	13.7777	3.5715	0.868377	2.96127	0.00306371	0.133565	protein coding	angiotensin I converting enzyme (peptidyl-dipeptidase A) 1	0.451221	0.918179	1.08781	1.51802	0	0	0	0	0.276316	0.215361	0.231693	0.267603	34	52	48	81	0	0	0	0	5	8	1	9	20.7811	33.0991	33.2883	52.6465	0	0	0	0	7.08698	5.46497	6.63044	6.33503
12	113665744	113666198	-1	ENSMUSG00000095429	Ighv5-12	61.4134	2.58636	0.536295	2.95799	0.00309652	0.134535	IG V gene	immunoglobulin heavy variable 5-12	63.3818	99.9864	110.846	12.46	5.64358	14.306	13.4496	14.1797	49.623	11.874	11.8999	14.5729	157	216	192	22	9	18	17	16	64	15	17	23	155.99	192.389	181.071	23.0675	8.12083	19.9558	18.7752	17.1086	67.9401	16.0604	18.1787	18.3051
8	127539390	127634965	-1	ENSMUSG00000110697	Gm31718	25.4339	2.54	0.521197	2.95474	0.00312936	0.135499	lncRNA	predicted gene, 31718	1.69359	7.05823	4.07239	3.2969	0.975948	0.546081	0	1.07834	1.27501	1.05513	0.965134	1.83652	35	108	57	47	9	6	0	11	15	12	6	19	31.0406	101.258	49.5941	45.5031	10.4695	5.67884	0	9.69972	13.014	10.6554	10.9916	17.302
11	102321141	102327874	1	ENSMUSG00000034708	Grn	879.579	2.18766	0.402273	2.95237	0.00315349	0.136081	protein coding	granulin	94.0066	92.2282	71.2204	70.3965	25.3309	14.8443	11.7157	12.8231	39.5689	46.0862	26.7971	32.5147	2700	2296	1519	1490	457	199	145	172	570	639	422	535	2587.21	1986.77	1302.37	1458.94	408.039	231.8	183.082	173.199	606.46	698.851	458.259	459.971
6	124890644	124897066	-1	ENSMUSG00000030122	Ptms	248.835	1.59936	0.203138	2.95051	0.00317254	0.136441	protein coding	parathymosin	38.4416	46.5852	37.2919	39.1681	11.7312	25.051	18.1345	19.8348	17.871	27.2015	14.337	20.3721	574	587	393	409	111	155	110	119	136	201	119	185	534.865	507.342	344.759	410.382	95.5356	197.764	143.269	135.441	138.474	208.534	123.951	145.699
4	129513067	129517740	-1	ENSMUSG00000028795	Ccdc28b	96.1074	1.94364	0.320017	2.94872	0.00319097	0.136771	protein coding	coiled coil domain containing 28B	23.0496	26.6598	27.0736	25.4261	8.22421	8.09043	4.55613	5.30435	16.5741	15.9805	6.81317	10.3937	211	190	173	175	50	36	24	24	74	83	40	66	215.668	195.25	168.317	179.149	45.0397	42.9512	24.2061	24.3577	86.3632	82.3864	39.6115	49.9888
11	96740696	96752029	1	ENSMUSG00000018672	Copz2	10.9801	3.79413	0.949157	2.94381	0.00324202	0.138493	protein coding	coatomer protein complex, subunit zeta 2	5.80578	3.23564	2.10865	3.24859	0	0	0	0	0.509015	1.75052	0.300919	0.541725	67	32	17	27	0	0	0	0	3	10	1	2	55.0376	24.0088	13.2819	23.1903	0	0	0	0	2.68723	9.1434	1.77254	2.63971
7	25456698	25488130	-1	ENSMUSG00000002602	Axl	168.635	3.95751	1.00655	2.93826	0.00330056	0.140054	protein coding	AXL receptor tyrosine kinase	19.3954	25.3408	10.8332	5.91312	3.63616	2.7315	0	0.312828	0.69445	3.15684	0.123278	1.07615	586	702	209	182	90	47	0	9	21	28	4	15	682.964	698.44	253.463	156.794	74.9412	54.5734	0	5.40611	13.6181	61.2481	2.69734	19.4783
4	89224536	89229276	-1	ENSMUSG00000073802	Cdkn2b	6.52993	3.94452	1.00191	2.93889	0.0032939	0.140054	protein coding	cyclin dependent kinase inhibitor 2B	1.58934	1.05888	1.50781	0.52338	0	0	0	0	0	0.42785	0.192006	0.259134	30	17	20	7	0	0	0	0	0	4	2	3	28.9467	15.0951	18.2468	7.17813	0	0	0	0	0	4.29353	2.17293	2.42597
18	35780320	35782420	-1	ENSMUSG00000024353	Mzb1	1848.49	2.25313	0.427295	2.93272	0.0033601	0.14196	protein coding	marginal zone B and B1 cell-specific protein 1	528.688	489.845	449.663	479.317	99.3098	69.4729	74.0892	78.3047	273.297	256.504	141.683	194.006	5742	4505	3354	3662	618	323	352	323	1470	1337	814	1236	5256.12	3811.84	2970.38	3588.63	577.878	391.887	418.241	382.062	1513.13	1405.08	875.252	991.423
17	52139847	52141751	1	ENSMUSG00000103753	Gm6934	85.591	-1.88704	0.302538	-2.93201	0.0033678	0.14196	TEC	predicted gene 6934	0.368353	1.30099	2.986	1.71596	7.78466	9.41588	7.51166	9.96911	7.56023	6.25899	6.69417	7.16651	10	30	57	33	133	122	98	120	105	84	100	119	9.64602	26.6666	51.9556	33.8379	119.317	139.902	111.693	128.121	110.254	90.3086	108.926	96.465
5	137243270	137246852	-1	ENSMUSG00000094840	Muc3a	11.1037	-2.87099	0.638679	-2.92947	0.00339536	0.14265	protein coding	mucin 3A, cell surface associated	0.149823	0.088189	0.05327	0.105748	1.13078	0.941626	0.935169	1.43597	0.805338	1.74251	0.544495	1.28585	4	2	1	2	19	12	12	17	11	23	8	21	3.85865	1.77779	0.91158	2.05089	17.0456	13.7599	13.6757	18.1502	11.5507	24.7271	8.71363	17.0225
18	67422256	67455542	1	ENSMUSG00000024525	Impa2	116.205	2.53902	0.525999	2.92589	0.0034347	0.143756	protein coding	inositol monophosphatase 2	5.73609	10.1525	6.6413	12.0233	0.552857	0.758768	6.85194	0.756609	1.48573	2.88259	1.36187	2.58455	144	150	104	137	27	28	68	26	59	60	58	57	217.617	301.483	167.413	343.489	12.2763	16.333	147.604	14.0873	31.3902	60.2561	32.1043	50.4012
7	118084334	118091198	-1	ENSMUSG00000095115	Itpripl2	18.2039	2.36076	0.465213	2.92503	0.00344427	0.143756	protein coding	inositol 1,4,5-triphosphate receptor interacting protein-like 2	0.627239	0.309318	0.412299	0.515621	0.193746	0.098672	0.039184	0.148293	0.128295	0.170989	0.188066	0.092265	67	28	31	39	13	5	2	7	7	9	11	6	64.451	24.8778	28.1493	39.897	11.6522	5.7527	2.28616	7.47818	7.34146	9.68068	12.0076	4.87317
12	115257682	115258124	-1	ENSMUSG00000104452	Ighv8-8	309.086	2.71768	0.587758	2.92243	0.00347308	0.144485	IG V gene	immunoglobulin heavy variable 8-8	538.444	180.622	266.354	357.668	23.7931	39.4821	33.9124	33.5035	187.131	86.1758	95.4229	115.286	1370	401	474	649	39	51	44	39	248	112	140	188	1360.15	357.162	446.723	680.34	35.1832	56.5741	48.6299	41.7035	263.184	119.913	149.741	149.721
10	86526073	86541373	-1	ENSMUSG00000020048	Hsp90b1	17244.6	2.1661	0.399331	2.92013	0.0034988	0.14461	protein coding	heat shock protein 90, beta (Grp94), member 1	1316.28	1212.91	944.16	1003.9	273	215.779	189.86	244.546	661.695	613.015	291.176	445.149	54783	42779	27605	29603	6807	4126	3730	4317	13784	12522	6299	10904	51636.7	37243.4	24610.2	29656.1	6268.34	4802.87	4229.12	4708.17	14455.9	13250.5	7097.69	8976.25
17	12901293	12988551	-1	ENSMUSG00000023830	Igf2r	515.935	1.58778	0.201235	2.92087	0.00349057	0.14461	protein coding	insulin-like growth factor 2 receptor	8.82298	9.62164	8.34104	9.74205	2.6404	5.12534	4.10843	4.63139	4.35745	6.03313	2.66249	5.81566	1229	1102	785	834	231	295	233	254	310	414	203	493	1121.98	957.702	704.774	932.898	196.526	369.806	296.655	289.043	308.588	422.722	210.382	380.144
17	26780463	26875908	1	ENSMUSG00000001576	Ergic1	437.244	1.80686	0.276645	2.9166	0.00353868	0.145784	protein coding	endoplasmic reticulum-golgi intermediate compartment (ERGIC) 1	47.6308	36.4463	29.9927	28.1742	10.4852	8.66795	11.8378	12.2364	20.7948	22.875	16.157	17.688	1273	725	568	614	238	136	187	168	312	307	272	308	1355.28	811.72	567.044	603.68	174.621	139.939	191.258	170.874	329.513	358.628	285.662	258.702
7	100150923	100164167	-1	ENSMUSG00000030708	Dnajb13	6.41693	3.35459	0.808288	2.91305	0.00357912	0.146502	protein coding	DnaJ heat shock protein family (Hsp40) member B13	1.20942	1.08419	1.59235	0.254464	0.249874	0.165009	0.054618	0.236573	0.175784	0	0	0.318655	22	14	17	2	6	3	1	4	1	0	0	2	23.5391	16.5169	20.5925	3.7295	2.8465	1.82222	0.603603	2.25974	1.90532	0	0	3.18795
8	95113066	95122005	1	ENSMUSG00000031770	Herpud1	1404.95	1.63484	0.217859	2.914	0.00356835	0.146502	protein coding	homocysteine-inducible, endoplasmic reticulum stress-inducible, ubiquitin-like domain member 1	171.31	132.482	125.161	108.204	49.9539	46.6113	44.0716	72.1286	75.1128	93.9663	56.0705	75.1591	4316	2756	2236	2033	823	548	571	570	995	1002	792	994	3995.62	2418.63	1939.67	1900.45	681.944	616.84	583.667	825.636	975.642	1207.58	812.614	901.075
1	192903942	192946383	-1	ENSMUSG00000016194	Hsd11b1	109.493	1.76306	0.262382	2.9082	0.00363513	0.148318	protein coding	hydroxysteroid 11-beta dehydrogenase 1	16.5697	8.86571	19.0454	12.4513	4.64949	5.02605	7.77724	5.56736	7.45053	4.09281	5.95042	7.80954	308	145	229	166	55	43	74	51	76	43	54	85	300.803	125.977	229.729	170.213	49.4027	51.7694	80.1673	49.6016	75.3232	40.9383	67.1218	72.8736
4	58965439	58987119	-1	ENSMUSG00000028378	Ptgr1	16.3863	3.35652	0.812371	2.90079	0.00372223	0.151386	protein coding	prostaglandin reductase 1	1.13676	2.29055	1.36104	1.68935	0.095114	0.313873	0	0	0.701969	0.545058	0	0.146898	38	65	32	40	2	5	0	0	12	9	0	3	36.6043	57.7314	29.1201	40.9633	1.7926	5.73451	0	0	12.588	9.67045	0	2.43139
6	68279411	68280142	1	ENSMUSG00000105606	Igkv2-109	137.606	2.20515	0.416235	2.89535	0.00378736	0.153058	IG V gene	immunoglobulin kappa variable 2-109	60.3299	104.978	304.576	99.7768	24.1705	17.8608	28.4544	46.0423	20.136	43.2345	76.6406	70.7017	167	253	590	197	43	25	40	58	29	61	122	125	165.447	225.338	554.984	206.301	38.7962	27.7912	44.3077	61.9673	30.752	65.3274	130.597	99.6627
3	94922936	94927449	1	ENSMUSG00000085956	4930481B07Rik	14.1202	-2.79768	0.620775	-2.89587	0.00378114	0.153058	lncRNA	RIKEN cDNA 4930481B07 gene	0.213661	0.083607	0.507107	0.794632	2.00262	5.98287	4.10443	2.99192	3.96211	2.96837	4.76266	1.62069	3	1	5	5	12	21	14	13	17	15	23	14	2.10306	0.644137	3.31654	5.88986	11.5373	33.4131	22.9396	14.453	21.7185	16.0986	29.129	8.19983
6	70495234	70495833	1	ENSMUSG00000094117	Igkv3-12	96.306	2.45866	0.505274	2.88688	0.00389082	0.156741	IG V gene	immunoglobulin kappa variable 3-12	132.402	117.237	96.7955	59.7822	11.7897	16.1735	11.144	6.0073	45.0323	65.057	35.8251	25.2032	339	262	173	109	19	21	15	7	60	85	53	41	336.508	233.353	163.027	114.258	17.14	23.2981	16.581	7.48506	63.6702	91.0063	56.6902	32.6556
9	103081200	103107643	-1	ENSMUSG00000032554	Trf	18.7977	4.11737	1.08034	2.88556	0.00390717	0.156903	protein coding	transferrin	4.89782	3.47697	2.70456	2.77755	0	0.229079	0	0	1.9876	0	0	0.519317	79	35	72	61	0	1	0	0	8	0	0	12	84.909	47.1804	31.1534	36.2598	0	2.25328	0	0	19.1891	0	0	4.62766
1	165591315	165602877	1	ENSMUSG00000040713	Creg1	116.627	1.65163	0.225942	2.88407	0.00392566	0.15715	protein coding	cellular repressor of E1A-stimulated genes 1	7.98928	8.95797	8.31549	11.7055	3.65735	2.41308	3.86081	3.75007	5.24864	6.08002	3.83637	4.70615	250	238	183	174	72	36	58	52	84	94	66	90	233.14	204.611	161.234	257.224	62.4676	39.9542	63.9725	53.7067	85.2968	97.7588	69.5632	70.5918
8	56747620	56774078	1	ENSMUSG00000031613	Hpgd	5.10855	4.75388	1.30266	2.88171	0.00395527	0.157345	protein coding	hydroxyprostaglandin dehydrogenase 15 (NAD)	0.339242	0.798406	1.62865	0.598565	0	0.354964	0	0	0	0	0	0	8	16	27	10	0	4	0	0	0	0	0	0	7.70676	14.197	24.5838	10.2397	0	4.57538	0	0	0	0	0	0
1	161222980	161245981	1	ENSMUSG00000026700	Tnfsf4	15.2471	2.73294	0.601164	2.88264	0.00394364	0.157345	protein coding	tumor necrosis factor (ligand) superfamily, member 4	1.33915	3.15279	0.979511	1.51231	0.303958	0.160285	0.079594	0.172555	0.224352	0.696453	0.486612	0.87555	35	70	18	28	5	2	1	2	3	9	7	14	33.7659	62.2234	16.4103	28.7144	4.4858	2.29309	1.13955	2.13528	3.15031	9.67567	7.62394	11.3477
7	140589499	140590683	-1	ENSMUSG00000025492	Ifitm3	8.50846	3.34752	0.815295	2.87934	0.00398503	0.158035	protein coding	interferon induced transmembrane protein 3	5.50475	2.82223	4.98186	0.946332	0.423943	0.275468	0.547871	0.898191	0	0.805858	1.19981	0	41	18	26	5	2	1	2	3	0	3	5	0	39.9109	16.0161	23.9996	5.16667	1.79904	1.1332	2.25548	3.19597	0	3.21925	5.40525	0
12	114751992	114752425	-1	ENSMUSG00000094546	Ighv1-26	1204.02	2.65952	0.577091	2.87566	0.00403179	0.159118	IG V gene	immunoglobulin heavy variable 1-26	1697.67	1059.6	792.559	1937.23	147.686	110.559	122.296	170.163	530.991	753.116	318.677	423.981	4154	2265	1358	3383	233	138	153	190	677	942	450	666	4128.47	2017.29	1281	3547.66	210.256	152.957	168.929	203.169	718.698	1008.66	481.178	529.927
11	115007040	115024818	-1	ENSMUSG00000047798	Cd300lf	300.83	1.85834	0.298528	2.87523	0.00403733	0.159118	protein coding	CD300 molecule like family member F	21.0079	31.8355	28.1238	24.4192	13.5277	7.3806	4.21063	5.57056	13.8265	13.282	8.63765	15.879	603	709	575	514	201	103	69	79	223	185	139	277	588.998	698.528	523.813	515.444	221.942	117.383	67.0172	76.6324	215.835	205.135	150.445	228.788
5	135916773	135918417	1	ENSMUSG00000004951	Hspb1	14.2911	2.97818	0.689926	2.86723	0.00414076	0.162691	protein coding	heat shock protein 1	6.24205	4.34705	1.67597	2.55203	0	0.180401	1.11709	0.608121	1.05775	1.45477	0.9771	0.439696	69	41	13	20	0	1	6	3	6	8	6	3	67.1613	36.6097	11.9816	20.6771	0	1.10131	6.82475	3.21116	6.33799	8.62436	6.53251	2.43177
12	113266585	113271553	-1	ENSMUSG00000076613	Ighg2b	41321	4.14106	1.09602	2.86587	0.00415864	0.162891	IG C gene	immunoglobulin heavy constant gamma 2B	8925.99	16939.9	5467.56	4673.41	32.6306	32.6228	32.406	7.29077	1309.11	3122.83	583.834	882.338	129367	209446	55848	48293	425	250	259	63	9909	22694	4786	7986	135504	201288	55150.5	53424.7	289.934	280.995	279.337	54.3188	11068	26120.7	5507	6884.87
7	45266713	45270483	1	ENSMUSG00000008461	Fut1	45.9474	3.93647	1.02596	2.86217	0.00420748	0.164298	protein coding	fucosyltransferase 1	6.34378	3.4429	4.21669	2.49002	0	0.110561	0.16468	0	1.33858	0.906313	0.527192	0.129337	241	111	84	67	0	2	3	0	26	17	11	3	225.509	95.7964	99.5967	66.6546	0	2.22996	3.324	0	26.4992	17.7515	11.6448	2.36329
8	105979270	105981785	-1	ENSMUSG00000069920	B3gnt9	35.257	2.73702	0.60756	2.85901	0.00424964	0.165437	protein coding	UDP-GlcNAc:betaGal beta-1,3-N-acetylglucosaminyltransferase 9	4.10487	5.31478	2.01347	1.91607	0.422141	0.804928	0.245946	0.0666	1.86564	1.55305	0.48319	0.579555	141	71	48	46	9	13	4	1	19	26	9	12	120.483	122.102	39.2672	42.3496	7.25207	13.4049	4.09893	0.959356	30.495	25.1161	8.81237	8.74377
6	145945261	145947488	-1	ENSMUSG00000108161	Gm32914	12.7446	2.6803	0.588623	2.85463	0.00430876	0.167227	lncRNA	predicted gene, 32914	1.39164	1.3842	1.3631	0.480257	0.344119	0.389284	0.19329	0.069797	0.18141	0.0626	0.450083	0.354278	45	38	31	11	7	6	3	1	3	1	8	7	43.3815	33.7745	28.2335	11.2736	6.27864	6.88532	3.42132	1.06781	3.1493	1.07522	8.71807	5.67676
6	70317860	70318437	-1	ENSMUSG00000096594	Igkv8-19	152.658	2.16383	0.408284	2.85055	0.00436439	0.168492	IG V gene	immunoglobulin kappa variable 8-19	103.786	162.978	254.544	106.469	21.7918	47.3532	28.2907	26.7471	21.9195	47.0336	96.1251	92.3139	281	385	483	206	38	65	39	29	28	65	150	160	273.262	336.384	445.98	211.716	33.6331	70.8476	42.3588	34.6141	32.1886	68.2852	157.501	125.124
14	55728108	55745729	1	ENSMUSG00000022211	Carmil3	29.1877	-2.59532	0.559702	-2.8503	0.00436781	0.168492	protein coding	capping protein regulator and myosin 1 linker 3	0.17029	0.165816	0.222536	0.310606	0.234737	1.8293	3.9313	1.0643	2.00425	2.64857	2.02202	1.4677	12	11	10	16	11	17	25	35	31	19	28	32	6.48446	4.94221	5.63046	8.90649	5.23173	39.5229	85.0014	19.8898	42.5023	55.5697	47.8431	28.7277
6	70363656	70364236	-1	ENSMUSG00000076591	Igkv8-16	116.652	2.9032	0.668143	2.8485	0.00439262	0.168937	IG V gene	immunoglobulin kappa variable 8-16	262.403	66.258	34.9907	73.2148	16.4526	11.1586	13.8883	20.342	70.4389	15.9065	23.9043	16.663	745	164	70	148	30	16	20	26	104	23	39	30	737.614	146.075	65.8087	154.941	27.0689	17.797	22.1674	27.7708	110.268	24.6363	41.7527	23.9258
15	77468019	77480325	-1	ENSMUSG00000050014	Apol10b	11.6585	3.02713	0.712275	2.84599	0.00442733	0.169759	protein coding	apolipoprotein L 10B	1.5637	0.834146	1.13258	0.624804	0.234523	0.123835	0.368919	0	0.11539	0.477861	0	0.193185	53	24	27	15	5	2	6	0	2	8	0	4	51.0714	21.3245	24.5783	15.3668	4.48321	2.29482	6.84166	0	2.09879	8.59941	0	3.24323
7	43211680	43224885	1	ENSMUSG00000056592	Zfp658	68.0062	2.19497	0.420613	2.84102	0.00449689	0.171908	protein coding	zinc finger protein 658	5.47353	3.11664	2.9549	3.30076	1.1853	0.399246	0.872104	0.951326	1.15127	2.47605	1.81637	0.809253	265	118	97	115	30	10	22	20	31	54	42	26	251.024	111.878	90.0428	113.992	31.8167	10.3889	22.7102	21.412	29.4036	62.5675	51.761	19.077
8	54973468	54983033	-1	ENSMUSG00000054408	Spcs3	1072.01	1.64347	0.227404	2.82962	0.00466039	0.177625	protein coding	signal peptidase complex subunit 3 homolog (S. cerevisiae)	59.9373	50.2585	42.2921	37.9903	19.1927	20.7438	15.9573	19.563	29.6376	33.2659	15.7794	26.3461	3130	2226	1554	1405	630	515	399	452	791	857	452	839	3013.87	1978.1	1413.01	1438.51	564.863	591.828	455.61	482.774	829.94	921.654	493.024	680.963
7	127592441	127595770	1	ENSMUSG00000108353	Gm45205	24.4701	-2.17606	0.41592	-2.82762	0.00468948	0.1782	TEC	predicted gene 45205	0.159882	0.11781	0.340848	0.169317	1.46247	0.966688	1.37716	1.89697	1.525	1.1342	0.765007	0.819203	8	5	12	6	46	23	33	42	39	28	21	25	7.70384	4.44323	10.9125	6.14355	41.2451	26.4285	37.6786	44.8587	40.9214	30.1119	22.9045	20.2897
12	113218450	113223856	-1	ENSMUSG00000095079	Igha	17057.7	4.96852	1.40508	2.82441	0.00473674	0.17946	IG C gene	immunoglobulin heavy constant alpha	8340.07	1830.65	441.421	1449.66	12.1285	3.77444	0.614158	1.07068	366.563	537.292	127.85	239.399	118978	22518	4486	14755	148	48	11	14	2707	3836	1016	2126	143812	24708.1	5057.5	18823.7	122.408	36.9281	6.01326	9.06075	3520.05	5104.77	1369.86	2121.9
14	54606899	54655237	-1	ENSMUSG00000000958	Slc7a7	71.5409	1.77696	0.276023	2.81484	0.00488013	0.184344	protein coding	solute carrier family 7 (cationic amino acid transporter, y+ system), member 7	10.982	9.71219	8.24971	10.4384	3.90385	5.32208	2.73894	3.05545	3.98141	6.36353	4.15105	3.32801	214	207	152	146	43	38	7	16	65	61	27	63	187.439	129.75	93.5571	134.161	38.9988	51.5396	26.544	25.5938	37.8435	59.8437	44.0237	29.1972
6	145877367	145910949	1	ENSMUSG00000030255	Sspn	101.022	2.34927	0.483068	2.79313	0.00522004	0.196419	protein coding	sarcospan	4.16516	6.0491	3.49636	2.8266	1.08506	0.717787	0.337336	0.368716	1.45049	3.09635	1.48738	0.760863	281	346	166	137	46	23	11	11	50	103	55	32	271.53	308.665	151.447	138.759	41.4017	26.5498	12.4869	11.7966	52.6595	111.218	60.2502	25.4959
17	87943407	87958557	1	ENSMUSG00000045394	Epcam	155.793	2.02613	0.367464	2.79248	0.00523065	0.196419	protein coding	epithelial cell adhesion molecule	25.8769	17.1239	11.806	11.0271	3.55491	5.08478	5.16043	3.48535	10.8139	9.70736	4.50734	6.64765	636	357	204	192	55	34	61	38	136	118	61	100	585.516	303.276	177.495	187.888	47.0796	65.2797	66.3005	38.7037	136.265	121.023	63.3718	77.3165
7	127753548	127822988	1	ENSMUSG00000070369	Itgad	12.2317	2.99874	0.716856	2.78821	0.00530007	0.19677	protein coding	integrin, alpha D	0.548802	0.486447	1.79413	0.242171	0.136439	0.144359	0.214996	0.038772	0.034162	0.284329	0	0.168798	32	24	27	10	5	4	6	1	1	8	0	6	28.1184	19.4655	61.0784	9.3435	4.09158	4.19662	6.25476	0.974924	0.957589	7.85307	0	4.4455
6	70312825	70313491	-1	ENSMUSG00000076587	Igkv6-20	428.867	2.94642	0.697797	2.78938	0.00528091	0.19677	IG V gene	immunoglobulin kappa variable 6-20	332.088	154.419	913.731	561.666	29.0857	39.8151	37.5202	45.8107	128.503	49.3691	39.8835	345.012	924	374	1779	1113	52	56	53	58	186	70	64	613	915.25	333.117	1673.26	1165.44	46.9184	62.2606	58.7158	61.9632	197.231	74.9692	68.5123	488.762
5	103573058	103746169	1	ENSMUSG00000034573	Ptpn13	19.2354	2.65296	0.592863	2.7881	0.00530183	0.19677	protein coding	protein tyrosine phosphatase, non-receptor type 13	0.676788	0.966517	0.397107	0.428487	0.218831	0.260265	0.083825	0.418208	0.142468	0.032821	0.073845	0.053134	56	81	21	29	17	5	3	8	9	2	5	4	57.4538	64.2223	22.3992	27.3915	10.8731	12.5361	4.04062	17.4236	6.73535	1.53518	3.89524	2.31855
11	120451124	120464079	-1	ENSMUSG00000025130	P4hb	1921.57	1.5126	0.183782	2.7892	0.00528391	0.19677	protein coding	prolyl 4-hydroxylase, beta polypeptide	123.684	106.322	91.366	92.3497	45.0522	44.0611	50.6962	45.6543	69.2657	66.0186	48.2157	56.1326	5257	3812	2732	2780	1204	832	895	859	1505	1385	1125	1456	4973.17	3346.22	2440.97	2796.2	1060.27	1005.2	1157.45	900.911	1551.01	1462.61	1204.64	1160.15
18	20817656	20879461	-1	ENSMUSG00000056124	B4galt6	19.2112	2.66698	0.599054	2.78269	0.00539106	0.1995	protein coding	UDP-Gal:betaGlcNAc beta 1,4-galactosyltransferase, polypeptide 6	0.534287	0.853633	0.521878	0.644486	0.248051	0	0.139714	0.176279	0.152525	0.225845	0	0.219336	48	65	33	41	14	0	6	7	7	10	0	12	46.1718	57.7409	29.966	41.94	12.5465	0	6.85565	7.47623	7.3404	10.7536	0	9.74296
12	111780604	111798626	1	ENSMUSG00000021286	Zfyve21	35.8489	2.57942	0.567858	2.78137	0.00541296	0.19973	protein coding	zinc finger, FYVE domain containing 21	10.0437	6.41039	4.78244	4.01862	1.08448	1.36301	0.826138	0.133342	4.33674	1.4405	1.37332	2.12033	175	85	59	50	12	7	7	1	39	10	12	16	152.351	76.1114	48.2017	45.9033	9.62846	11.7309	7.11562	0.992661	36.6348	12.0395	12.9442	16.5324
6	116609969	116650913	-1	ENSMUSG00000042129	Rassf4	709.357	1.47589	0.171221	2.77941	0.00544581	0.199785	protein coding	Ras association (RalGDS/AF-6) domain family member 4	25.1625	35.4022	27.6666	29.7945	14.9367	12.733	13.3779	13.1473	19.1182	16.0615	10.4137	22.1204	1394	1755	1096	1104	427	309	349	313	480	503	407	700	1330.01	1464.67	971.657	1185.9	462.096	381.866	401.507	341.048	562.759	467.764	342.021	600.993
9	3017408	3021593	1	ENSMUSG00000095547	Gm10719	99.2816	-4.02634	1.08873	-2.77971	0.00544077	0.199785	protein coding	predicted gene 10719	0.159818	0.157796	0.57897	5.70855	2.47444	83.2815	82.6052	46.9381	3.95081	18.2879	38.4245	9.31482	1	1	3	30	12	302	302	156	15	68	160	43	0.96546	0.893846	2.78205	30.9772	10.7839	342.015	339.948	166.338	15.8802	72.9827	173.174	34.6386
5	66173892	66330461	-1	ENSMUSG00000070780	Rbm47	266.309	2.44856	0.521377	2.77834	0.00546374	0.199866	protein coding	RNA binding motif protein 47	29.3509	28.7431	22.7434	26.6235	3.69409	3.21462	1.78806	7.66112	10.984	18.4964	4.34747	8.1451	974	746	453	603	87	39	21	49	189	161	90	158	788.397	604.321	405.918	538.519	58.0777	48.9929	27.2716	100.994	164.452	273.749	72.5621	112.46
12	113699731	113700250	-1	ENSMUSG00000095210	Ighv5-9-1	707.559	3.66649	0.966417	2.75915	0.00579511	0.21138	IG V gene	immunoglobulin heavy variable 5-9-1	761.645	1031.52	990.444	93.3527	13.1333	9.49237	36.2915	7.28093	138.399	324.542	39.3876	86.092	2536	2916	2306	221	28	14	50	11	239	548	75	182	2432.12	2578.01	2101.01	224.309	24.5462	17.1984	65.8026	11.4104	246.117	570.759	78.1523	141.271
11	88721618	88755412	-1	ENSMUSG00000018428	Akap1	34.6811	2.72712	0.62682	2.75536	0.00586268	0.213234	protein coding	A kinase (PRKA) anchor protein 1	3.24519	1.69657	1.14673	2.5392	0.080551	0.846401	0.052827	0.2007	0.694924	1.1951	0.259034	0.663815	125	82	46	83	2	13	1	5	20	24	8	16	142.906	58.4778	33.5527	84.2012	2.07616	21.1478	1.32091	4.33748	17.0421	28.9972	7.08787	15.0257
13	38529083	38684278	1	ENSMUSG00000039004	Bmp6	17.3462	3.76836	1.00523	2.75396	0.00588783	0.213539	protein coding	bone morphogenetic protein 6	2.91184	0.564992	1.02145	0.858763	0.257775	0	0.038495	0.595502	0	0.448327	0.033602	0	158	26	39	33	1	0	1	8	0	12	1	0	111.987	17.008	26.1022	24.8706	5.80256	0	0.84065	11.2399	0	9.50027	0.803001	0
10	111821353	111838536	-1	ENSMUSG00000056888	Glipr1	194.35	1.7263	0.264143	2.74964	0.00596601	0.215759	protein coding	GLI pathogenesis-related 1 (glioma)	33.9629	39.6591	32.7119	32.6668	15.9725	11.9562	8.90967	8.39394	21.314	21.7419	15.4482	16.5884	475	441	288	311	122	80	60	52	152	145	119	142	443.432	405.299	283.783	321.174	122.06	88.5716	66.0525	53.7859	154.975	156.409	125.329	111.328
7	55417926	55428673	1	ENSMUSG00000051504	Siglech	6.13063	3.56609	0.933931	2.74762	0.00600291	0.216479	protein coding	sialic acid binding Ig-like lectin H	0.654599	1.03658	1.67201	0.277237	0	0.137279	0	0.073854	0.392257	0.066239	0	0.358222	20	18	27	6	0	2	0	1	2	1	0	3	14.4231	17.8771	24.4782	4.59989	0	1.7162	0	0.798612	4.81316	0.804155	0	4.05708
X	72830634	72834436	1	ENSMUSG00000002014	Ssr4	1011.58	2.06334	0.389223	2.73195	0.00629602	0.226408	protein coding	signal sequence receptor, delta	392.407	257.567	200.448	215.223	58.2791	63.4816	52.6803	84.6841	157.567	165.979	77.6025	110.288	3205	1837	1265	1264	413	353	280	390	707	698	468	633	3622.4	1861.06	1229.48	1496.1	314.885	332.497	276.13	383.656	810.03	844.218	445.129	523.321
7	127588880	127593039	-1	ENSMUSG00000030793	Pycard	291.286	1.75223	0.276643	2.71915	0.006545	0.234698	protein coding	PYD and CARD domain containing	53.1401	60.6157	45.0471	38.771	18.9988	20.4356	10.1298	28.7949	23.4245	35.4327	11.3578	24.8728	656	730	374	434	210	156	91	138	192	227	97	175	729.218	651.073	410.733	400.64	152.595	159.111	78.93	193.924	179.011	267.904	96.8454	175.443
5	124678758	124688569	1	ENSMUSG00000029390	Tmed2	1987.38	1.4792	0.17631	2.71795	0.00656874	0.234888	protein coding	transmembrane p24 trafficking protein 2	408.362	347.951	325.986	305.66	169.134	143.678	156.567	169.429	220.82	242.646	162.177	191.99	5191	3718	3089	2990	1354	900	894	1004	1542	1450	1054	1436	5029.55	3354.67	2668.21	2834.64	1219.25	1004	1095.56	1024.48	1514.77	1646.68	1241.31	1215.41
10	116253766	116309783	-1	ENSMUSG00000054934	Kcnmb4	43.8206	3.02172	0.745445	2.7121	0.0066859	0.238407	protein coding	potassium large conductance calcium-activated channel, subfamily M, beta member 4	18.7389	2.69054	4.64985	7.22152	1.49997	2.67628	0.366665	0.795304	4.59568	0.891671	0	2.4224	181	44	51	60	9	17	4	8	32	10	0	17	268.766	30.205	44.3125	77.9957	12.5919	21.7791	2.9861	5.59812	36.7075	7.04653	0	17.8588
4	136623228	136626114	-1	ENSMUSG00000036887	C1qa	7.03414	4.20054	1.18067	2.71077	0.00671266	0.238693	protein coding	complement component 1, q subcomponent, alpha polypeptide	3.09343	0.796862	2.14923	1.06447	0.35873	0	0.778794	0	0	0	0	0	41	9	20	10	3	0	5	0	0	0	0	0	39.5692	7.9783	18.2667	10.2533	2.68574	0	5.65646	0	0	0	0	0
2	71811584	72087818	1	ENSMUSG00000049044	Rapgef4	426.908	-1.71396	0.264595	-2.69831	0.00696934	0.24713	protein coding	Rap guanine nucleotide exchange factor (GEF) 4	3.90946	9.714	20.6338	12.8051	41.3481	49.1849	43.1037	91.9973	52.0452	36.9341	41.7724	61.7553	102	173	325	263	481	414	474	624	407	353	454	713	75.9686	147.75	266.413	187.375	470.275	542.288	475.596	877.35	563.215	395.445	504.379	616.837
12	113574807	113575237	-1	ENSMUSG00000094164	Ighv2-3	186.094	3.01747	0.748408	2.69568	0.00702445	0.247979	IG V gene	immunoglobulin heavy variable 2-3	164.696	462.831	168.49	151.088	12.9608	14.7743	16.3389	10.9926	25.642	171.313	33.9969	49.2502	394	968	282	258	20	18	20	12	32	210	47	76	391.802	862.162	266.11	270.661	18.0464	19.942	22.0704	12.834	33.9711	224.819	50.254	60.4572
1	164700402	164703922	-1	ENSMUSG00000103320	Gm37403	10.1798	2.75057	0.649488	2.69531	0.00703224	0.247979	TEC	predicted gene, 37403	0.225969	0.510668	0.963429	0.771101	0.089875	0.277283	0.078661	0.085125	0.110538	0.076345	0	0.27793	12	23	36	29	3	7	2	2	3	2	0	9	11.5529	20.4357	32.728	29.6869	2.68943	8.0435	2.28353	2.1359	3.14722	2.15061	0	7.30391
8	106194125	106198158	-1	ENSMUSG00000014846	Tppp3	13.9535	2.95034	0.724063	2.6936	0.0070685	0.248569	protein coding	tubulin polymerization-promoting protein family member 3	2.86664	5.61005	2.95186	2.81772	0	0.50755	0.504622	0.47459	0.799075	2.19418	0	0.994294	42	70	32	24	0	2	2	4	6	12	0	5	33.5346	51.3686	22.9443	24.8216	0	3.36884	3.3519	2.7247	5.20576	14.1428	0	5.97879
7	34818718	34821353	1	ENSMUSG00000034957	Cebpa	5.36886	4.17318	1.1786	2.69233	0.0070955	0.248831	protein coding	CCAAT/enhancer binding protein (C/EBP), alpha	0.413129	0.669386	0.770817	0.291646	0.254243	0.067099	0	0	0	0	0	0	16	22	21	8	5	1	0	0	0	0	0	0	14.3428	18.19	17.781	7.62457	5.16624	1.32172	0	0	0	0	0	0
4	11191351	11204779	1	ENSMUSG00000028212	Ccne2	41.463	2.80698	0.671853	2.68955	0.0071549	0.250225	protein coding	cyclin E2	3.0518	6.55511	2.69355	8.97973	0.367668	0.578828	0.337679	0	1.88191	3.1962	0.884385	1.36828	85	87	52	62	10	2	7	0	42	23	21	29	70.5211	118.564	41.3567	156.257	4.97276	7.58914	4.43071	0	24.218	40.6948	12.6985	16.2524
8	75820249	75827217	1	ENSMUSG00000005413	Hmox1	20.7553	2.81434	0.675485	2.68598	0.00723174	0.252219	protein coding	heme oxygenase 1	2.94241	2.4016	5.10177	2.66058	0.438055	1.0575	0	0.103574	1.52697	1.1148	0.798635	0.150098	64	34	78	41	6	11	0	1	17	12	4	2	55.6841	35.5746	64.1517	37.9154	4.85217	11.3551	0	0.961966	16.0929	11.6243	9.3913	1.4601
9	3025417	3033289	1	ENSMUSG00000095891	Gm10717	64.2147	-3.65186	0.987698	-2.68489	0.00725543	0.252354	protein coding	predicted gene 10717	0.439055	0.157796	0.189163	4.50096	2.69934	49.3239	41.6977	35.4804	4.76812	15.1325	28.9808	5.4688	3	1	1	24	13	178	153	119	18	56	120	25	2.93226	0.892691	0.908429	24.941	11.6558	201.876	171.543	126.314	18.8769	59.7647	130.223	20.6486
18	61233670	61265221	1	ENSMUSG00000024621	Csf1r	20.6221	3.60284	0.971255	2.67987	0.007365	0.255467	protein coding	colony stimulating factor 1 receptor	3.20306	1.53274	1.42147	2.8858	0	0.489681	0.05803	1.32475	1.00886	0.028148	0.124253	0	70	79	55	67	0	1	2	3	10	1	4	0	86.7621	32.4971	25.5836	58.8631	0	7.5259	0.892535	17.6108	15.2185	0.420105	2.09133	0
13	120471926	120480467	1	ENSMUSG00000114608	Gm36161	5.00784	3.87886	1.07468	2.6788	0.00738867	0.255592	lncRNA	predicted gene, 36161	0.573008	0.769345	0.483851	1.50091	0	0	0	0	0.187949	0.401749	0	0.0785	12	14	7	22	0	0	0	0	2	4	0	1	11.5648	12.4214	6.37752	22.5344	0	0	0	0	2.09685	4.29083	0	0.808351
9	108408031	108409964	1	ENSMUSG00000103621	Gm38366	26.2667	-2.01195	0.377985	-2.67723	0.00742334	0.256095	TEC	predicted gene, 38366	0.108642	0.596917	0.566512	0.460099	2.64713	2.04897	1.88416	2.85882	2.97318	2.63737	2.04041	1.89482	3	14	11	9	46	27	25	35	42	36	31	32	2.89363	12.4443	10.0257	9.22802	41.2666	30.9643	28.4949	37.3691	44.1004	38.7041	33.7686	25.9413
X	35871967	35909048	-1	ENSMUSG00000059708	Akap17b	141.389	2.07478	0.401764	2.67514	0.00746975	0.257	protein coding	A kinase (PRKA) anchor protein 17B	9.26976	4.71146	5.04687	4.15284	2.46149	1.40532	0.787605	1.89793	4.45517	1.89874	1.06046	2.89626	446	276	219	163	74	62	35	32	95	87	54	78	547.435	217.786	198.036	184.681	85.0824	47.0889	26.4105	55.0078	146.522	61.7831	38.9141	87.9184
11	98798627	98814766	1	ENSMUSG00000017499	Cdc6	54.2081	2.26943	0.475276	2.67093	0.00756407	0.259544	protein coding	cell division cycle 6	2.34555	3.0807	4.29808	4.26768	0.47842	0.263382	0.236698	1.25439	1.75875	1.80845	1.01319	1.46354	104	121	113	138	13	9	8	7	37	45	28	46	99.3107	102.097	120.916	136.068	11.8561	6.3273	5.69053	26.0654	41.4697	42.1889	26.6558	31.8519
12	115916158	115916625	-1	ENSMUSG00000095127	Ighv1-82	622.29	2.12428	0.42125	2.66891	0.00760979	0.26041	IG V gene	immunoglobulin heavy variable 1-82	548.17	812.369	521.969	305.42	104.975	104.608	151.202	79.3368	319.526	219.346	175.5	299.999	1611	2076	1073	639	198	155	225	106	488	328	296	562	1593.9	1849.02	1007.94	668.55	178.632	172.56	249.609	113.201	517.342	351.373	317.036	448.327
1	131566044	131603243	1	ENSMUSG00000004552	Ctse	182.055	1.7444	0.279675	2.66168	0.00777521	0.265358	protein coding	cathepsin E	20.225	14.1698	12.6311	10.3986	6.37164	3.77756	5.1083	5.66682	7.95251	9.20763	6.82111	5.98724	620	368	270	223	118	52	73	75	120	133	112	109	582.054	319.19	241.533	225.353	107.326	61.6832	83.4751	80.0377	127.454	146.004	121.978	88.5687
6	118438911	118456281	-1	ENSMUSG00000072623	Zfp9	20.9839	2.88752	0.709683	2.65967	0.00782165	0.265767	protein coding	zinc finger protein 9	1.58634	2.07863	0.306443	0.802522	0	0.440444	0.160036	0.150015	0.227232	0.634686	0.23051	0.125715	94	90	13	31	0	11	3	4	7	14	6	3	78.0214	80.0211	10.0144	29.7226	0	12.291	4.4693	3.62103	6.22389	17.1996	7.04463	3.17823
13	21938293	21938673	1	ENSMUSG00000095217	H2bc15	320.684	1.76281	0.286839	2.65936	0.00782897	0.265767	protein coding	H2B clustered histone 15	202.506	269.157	292.609	326.224	67.6963	53.4316	63.7323	114.914	174.944	184.008	101.722	151.117	581	671	587	666	125	77	93	150	261	269	168	276	575.117	597.647	551.71	697.09	112.789	85.673	103.109	160.215	276.708	288.144	179.871	220.135
6	89293296	89339602	-1	ENSMUSG00000030084	Plxna1	105.1	2.51486	0.571152	2.65228	0.00799498	0.270681	protein coding	plexin A1	5.59815	4.8994	6.58879	1.14528	0.449596	1.36138	0.701122	2.15542	0.566705	3.37138	0.19346	0.956243	341	218	146	104	40	17	35	24	41	65	15	38	353.907	242.436	276.763	54.5217	16.6358	48.8319	25.1677	66.8738	19.9516	117.434	7.59951	31.0736
12	114011861	114012432	-1	ENSMUSG00000096108	Ighv11-2	1249.41	3.82682	1.06694	2.64947	0.0080617	0.271422	IG V gene	immunoglobulin heavy variable V11-2	567.898	675.59	1919.63	1237.23	4.647	6.95415	6.42829	7.64909	101.73	305.854	199.15	199.674	2298	2361	5434	3558	12	14	13	14	213	625	458	510	2258.72	2103.28	5073.09	3705.8	10.8177	15.6932	14.5173	14.9306	225.326	670.294	492.19	408.238
14	44781512	44874658	-1	ENSMUSG00000115801		44.1158	-3.26613	0.855295	-2.64953	0.00806042	0.271422	lncRNA	novel transcript	0.004689	0.000791	0.00666	0.011462	0.006403	0.237703	0.160114	0.080431	0.003937	0.042189	0.075971	0.017633	7	1	7	12	6	168	114	53	3	31	62	16	6.72782	0.888367	6.34862	12.2669	5.37642	193.494	130.433	56.6311	3.14514	33.3497	67.7253	13.0031
9	3003346	3006948	1	ENSMUSG00000096385	Gm11168	26.1478	-3.44509	0.923137	-2.64867	0.00808084	0.271422	protein coding	predicted gene 11168	0.136009	0.472449	0	1.97868	0.777326	18.7948	24.7501	12.5628	0.959914	4.71782	8.73841	3.13552	1	3	0	10	4	68	90	42	4	17	36	14	0.979384	2.66286	0	10.2567	3.61968	77.2037	101.329	44.9083	4.24081	18.317	38.9222	11.3346
6	67736684	67737397	1	ENSMUSG00000096580	Igkv1-132	11.3954	3.22063	0.839234	2.64602	0.00814454	0.272842	IG V gene	immunoglobulin kappa variable 1-132	13.4643	27.3521	10.445	2.6979	1.19518	0	0.755136	7.60169	3.69359	0	2.00265	2.40358	35	62	19	5	2	0	1	9	5	0	3	4	34.5817	54.9876	17.8251	5.21799	1.79669	0	1.10127	9.58197	5.28309	0	3.19608	3.17323
16	84746573	84970654	-1	ENSMUSG00000022892	App	143.525	1.92875	0.35118	2.64465	0.00817743	0.273225	protein coding	amyloid beta (A4) precursor protein	9.33887	8.41827	4.79583	5.75285	5.00848	2.01721	1.49022	1.95026	2.68387	3.35552	3.38251	2.01347	452	344	165	198	152	59	43	48	73	85	57	64	449.205	316.945	153.276	208.375	141.005	55.0531	40.7012	46.0387	71.8932	88.9306	101.097	49.7822
12	114646252	114646685	-1	ENSMUSG00000076695	Ighv1-18	479.584	2.79266	0.678654	2.64149	0.00825425	0.274351	IG V gene	immunoglobulin heavy variable V1-18	357.698	832.819	1027.21	191.459	43.1099	57.0326	51.1731	35.8374	330.866	245.718	112.167	71.1548	875	1780	1760	334	68	71	64	40	422	307	159	112	869.606	1585.66	1660.18	350.25	61.3612	78.694	70.6617	42.7716	447.984	328.718	170.013	89.1152
9	14265286	14292803	-1	ENSMUSG00000037419	Endod1	207.685	1.65433	0.247691	2.64173	0.00824835	0.274351	protein coding	endonuclease domain containing 1	7.55226	8.09216	9.0647	11.2788	5.24174	2.98819	3.05855	2.97784	5.32114	6.14079	2.34913	4.44205	348	394	331	234	147	97	100	90	152	182	88	185	405.174	339.812	323.129	455.66	164.596	90.9603	93.172	78.4053	158.981	181.522	78.3107	122.497
6	69677751	69678271	-1	ENSMUSG00000076562	Igkv4-50	41.1929	2.82477	0.691483	2.63892	0.00831701	0.275539	IG V gene	immunoglobulin kappa variable 4-50	110.127	29.318	15.6747	18.7932	15.1322	14.3822	0.795346	7.12838	15.5919	19.0739	2.86679	5.06509	271	63	27	33	24	18	1	8	20	24	4	8	269.292	56.112	25.4664	34.6038	21.6568	19.9534	1.10426	8.55424	21.2318	25.6976	4.27724	6.36615
4	88636529	88640702	-1	ENSMUSG00000070923	Klhl9	249.112	1.52031	0.197218	2.63826	0.00833326	0.275539	protein coding	kelch-like 9	10.1897	9.42124	9.29564	6.68376	4.72927	4.17075	4.63393	4.90674	3.72367	6.18629	3.18402	4.72166	648	508	416	301	189	126	141	138	121	194	111	183	623.745	451.401	378.078	308.09	169.44	144.857	161.064	147.407	126.938	208.649	121.107	148.565
16	38275923	38316697	1	ENSMUSG00000075122	Cd80	59.124	2.11502	0.422962	2.63622	0.00838352	0.276482	protein coding	CD80 antigen	4.77514	5.4599	4.13539	4.18944	1.49041	0.442503	0.955817	1.51503	1.57274	2.01942	3.55366	0.862525	183	189	114	103	41	10	4	29	33	37	32	25	153.989	137.815	88.6092	101.735	28.1311	8.09653	17.5018	23.9776	28.2446	35.8816	71.2079	14.2973
6	68247469	68248251	1	ENSMUSG00000093861	Igkv1-110	945.118	2.35096	0.514722	2.62465	0.00867387	0.285319	IG V gene	immunoglobulin kappa variable 1-110	1004.36	710.72	1218.12	324.484	102.129	131.246	158.562	142.179	604.48	252.854	264	177.125	3168	1946	2688	729	206	208	253	204	990	405	477	355	3129.71	1733.2	2522.24	761.959	185.839	231.91	281.084	217.77	1049.15	433.991	511.221	283.345
7	45276912	45288517	1	ENSMUSG00000044562	Rasip1	33.6783	3.41878	0.923068	2.62037	0.00878345	0.287438	protein coding	Ras interacting protein 1	4.21002	1.7936	1.32676	1.1477	0	0.131468	0.043513	0	0.856297	1.05597	0.303873	0.068334	202	73	45	39	0	3	1	0	21	25	8	2	194.543	64.8735	40.9278	39.9369	0	3.44692	1.1417	0	22.0359	26.8859	8.72514	1.62312
12	105420115	105459354	1	ENSMUSG00000094910	D430019H16Rik	12.4379	2.99646	0.761775	2.6208	0.00877246	0.287438	protein coding	RIKEN cDNA D430019H16 gene	0.581097	0.527385	0.333416	0.220937	0.053363	0.188377	0.09351	0	0.131252	0.136041	0.020402	0	52	40	21	14	3	8	4	0	6	6	1	0	50.0256	35.5371	19.0717	14.3227	2.68885	9.20135	4.57095	0	6.29253	6.45291	1.09133	0
3	95785815	95789563	-1	ENSMUSG00000038550	Ciart	131.878	-1.70048	0.267417	-2.61942	0.00880798	0.287502	protein coding	circadian associated repressor of transcription	1.87314	4.02772	4.03046	3.34113	14.915	12.5753	17.0003	28.8049	11.5535	12.0856	7.92045	17.2906	42	62	69	63	230	131	143	195	143	105	115	227	38.6095	64.9822	55.1999	51.8597	179.94	147.07	198.969	291.388	132.621	137.256	101.443	183.195
3	138682073	138683842	-1	ENSMUSG00000104724	Gm43162	80.3815	-1.77658	0.297391	-2.61132	0.00901922	0.293644	TEC	predicted gene 43162	1.20099	2.02608	2.1068	1.18671	6.35985	5.69978	9.07408	16.065	6.41555	5.74741	7.41657	6.99941	30	43	37	21	100	68	109	178	82	71	102	107	28.9473	38.224	33.7405	21.539	89.7211	77.9484	124.187	190.033	86.115	76.3278	111.076	86.718
6	68013796	68014302	1	ENSMUSG00000076514	Igkv17-121	346.741	2.70052	0.653342	2.6028	0.00924652	0.300276	IG V gene	immunoglobulin kappa variable 17-121	229.68	965.363	208.175	172.023	52.9803	39.2918	49.794	31.1692	126.198	252.297	51.1415	93.0837	587	2154	373	314	87	51	65	36	168	330	75	153	582.685	1918.48	351.497	329.147	78.4832	56.5811	71.8512	38.4946	178.277	353.318	80.2219	121.861
12	113822769	113823290	-1	ENSMUSG00000095571	Ighv5-17	414.013	3.01804	0.776573	2.59865	0.00935904	0.303157	IG V gene	immunoglobulin heavy variable 5-17	574.602	642.46	188.246	70.8501	39.3519	23.5453	18.5098	39.0832	218.933	137.32	34.261	49.1859	1846	1791	423	162	81	38	30	57	365	224	63	100	1823.14	1595.13	396.802	169.256	73.0694	42.3814	33.3425	60.8502	386.792	240.03	67.5368	79.8252
11	83114402	83117430	1	ENSMUSG00000087107	AI662270	603.604	1.37008	0.143094	2.58627	0.009702	0.313468	lncRNA	expressed sequence AI662270	73.486	88.0213	87.4488	81.9865	40.847	37.5112	43.52	43.1284	62.5089	46.295	35.3594	57.4109	1188	1088	872	745	408	313	362	344	510	400	349	596	1144.08	1073.35	904.689	961.271	372.406	331.77	384.938	329.32	542.538	397.337	341.792	459.766
14	54959666	55019403	-1	ENSMUSG00000022180	Slc7a8	9.98164	3.17136	0.841081	2.58163	0.00983339	0.316909	protein coding	solute carrier family 7 (cationic amino acid transporter, y+ system), member 8	0.977308	0.584048	0.780937	0.249937	0	0.134609	0.133677	0.217239	0.031489	0.326284	0.0587	0	57	27	21	11	0	2	2	3	1	10	2	0	44.4385	20.7867	23.594	8.55797	0	3.47282	3.45134	4.8478	0.797382	8.17458	1.65851	0
19	45002853	45015550	1	ENSMUSG00000035342	Lzts2	19.3789	2.25912	0.489733	2.57104	0.0101394	0.325947	protein coding	leucine zipper, putative tumor suppressor 2	0.878932	2.97372	3.05083	1.59699	0.66535	0.546698	1.25718	0.344033	0.294718	0.370077	0.36586	0.870043	35	48	55	47	7	8	24	2	6	4	8	9	22.5572	59.7365	52.0243	30.8634	9.99442	7.9608	18.3202	4.3332	4.21222	5.23314	5.83437	11.4775
10	13083461	13350156	-1	ENSMUSG00000062866	Phactr2	72.7787	2.26994	0.494703	2.56708	0.0102558	0.328857	protein coding	phosphatase and actin regulator 2	2.24275	4.02205	2.49415	3.23716	2.13992	0.283325	0.375027	0.406942	0.726052	1.82115	0.45053	0.841159	145	200	129	123	75	18	24	8	22	60	15	29	145.825	204.696	107.754	158.499	81.438	10.4524	13.8458	12.9857	26.2902	65.2436	18.2022	28.113
9	102712116	102785504	1	ENSMUSG00000032547	Ryk	47.469	2.46657	0.571871	2.56451	0.0103322	0.330474	protein coding	receptor-like tyrosine kinase	4.41909	2.75689	3.73977	3.23841	0.563194	1.10076	0.197037	0.061383	0.867185	2.51194	1.16111	0.957094	166	90	99	94	15	13	4	1	17	46	27	22	160.568	78.4071	90.2879	88.6073	11.9774	22.6933	4.06517	1.09459	17.5474	50.2894	26.2149	17.8755
7	122190158	122191506	1	ENSMUSG00000108341	Gm44746	87.1923	-1.75319	0.293974	-2.5621	0.0104041	0.33111	TEC	predicted gene 44746	1.15276	1.80679	2.8905	4.26081	9.58307	13.9764	11.1525	18.7768	12.6485	11.6345	6.66246	9.84188	21	28	37	55	110	122	98	152	118	105	67	110	20.2931	24.8959	33.8098	56.4827	98.7401	139.6	111.478	162.223	124.001	112.849	72.8776	89.0568
5	148932461	148952623	-1	ENSMUSG00000085971	Gm15411	182.996	-1.75621	0.29513	-2.56228	0.0103987	0.33111	lncRNA	predicted gene 15411	1.26966	2.00931	5.67964	4.26602	9.83394	14.608	23.641	19.3199	10.5228	12.8241	13.17	16.5898	33	50	120	94	184	211	338	259	167	187	220	310	36.4865	45.1961	108.449	92.3166	165.406	238.186	385.759	272.476	168.404	203.054	235.169	245.054
2	152511381	152550590	1	ENSMUSG00000019188	H13	1485.27	1.65329	0.255401	2.55789	0.0105308	0.334307	protein coding	histocompatibility 13	142.292	108.638	87.9415	103.457	43.1656	39.0683	32.5594	40.198	83.8431	71.8983	50.187	54.7145	4111	2670	1857	2075	844	651	573	548	1211	1174	880	1045	4262.87	2547.48	1750.54	2333.97	756.897	664.088	553.863	591.024	1398.83	1186.81	934.247	842.561
12	84261139	84262911	-1	ENSMUSG00000113094	Gm47447	71.4503	-1.86808	0.340131	-2.55218	0.0107051	0.338995	lncRNA	predicted gene, 47447	0.980197	2.2993	3.72375	4.6092	10.0933	15.2529	15.3256	26.0175	10.1928	8.54681	13.5488	16.9644	12	24	32	40	78	90	91	142	64	52	92	128	11.627	21.3482	29.3491	41.1712	70.0753	102.657	103.223	151.461	67.3323	55.86	99.8629	103.436
14	119175388	119219109	1	ENSMUSG00000022136	Dnajc3	1248.58	1.66835	0.261986	2.55107	0.0107391	0.339229	protein coding	DnaJ heat shock protein family (Hsp40) member C3	49.7183	36.1397	28.8745	31.3396	16.9769	11.4207	11.2329	14.3508	26.4938	23.6637	12.6406	20.4363	3934	2424	1608	1756	844	429	425	502	1071	923	548	985	3785.58	2153.82	1460.79	1796.89	756.577	493.386	485.638	536.254	1123.4	992.749	598.042	799.828
				ENSMUSG00000095280		539.332	-3.91157	1.14371	-2.54572	0.0109052	0.34362			1.73428	0.778997	1.9038	33.1785	5.45578	371.633	470.336	260.208	12.2622	119.526	252.817	37.8443	13	5	10	176	26	1358	1728	875	47	448	1060	176	12.6586	4.45051	9.23302	181.921	23.3953	1539.6	1949.63	932.501	49.5477	480.923	1146.4	141.726
13	75854876	75920483	1	ENSMUSG00000001542	Ell2	790.215	1.66843	0.262992	2.54166	0.0110328	0.346785	protein coding	elongation factor for RNA polymerase II 2	52.2091	42.0371	29.0963	33.9016	14.4557	20.8532	13.0736	19.0873	24.3532	27.3644	9.30599	20.0965	2464	1822	1191	1166	425	330	295	280	618	553	348	544	2337.46	1473.13	865.555	1142.96	378.805	529.725	332.353	419.394	606.795	675.034	258.887	462.485
12	112738628	112766277	-1	ENSMUSG00000118667	Ahnak2	109.167	3.10031	0.828594	2.5348	0.0112513	0.352781	protein coding	AHNAK nucleoprotein 2	1.08476	3.12851	1.86651	1.8637	0.026711	0.07078	0.105398	0.037977	0.470812	0.976319	0.418955	0.477906	194	474	235	236	3	6	9	3	43	86	41	52	186.549	421.12	213.278	241.35	2.68864	6.90638	10.2919	3.20519	45.0901	92.5105	44.7688	42.2453
1	39657574	39690642	-1	ENSMUSG00000050967	Creg2	25.3803	3.05402	0.812091	2.5293	0.011429	0.357165	protein coding	cellular repressor of E1A-stimulated genes 2	1.70578	0.462533	0.376313	0.508716	0	0.044656	0.088667	0.047943	0.539254	0.214981	0.174101	0.052198	161	37	25	34	0	2	4	2	26	10	9	3	154.899	32.8759	22.7056	34.7867	0	2.30081	4.57185	2.13663	27.2706	10.7564	9.82375	2.43645
11	46559787	46597888	-1	ENSMUSG00000040413	Timd2	21.2852	2.51687	0.599853	2.52874	0.0114472	0.357165	protein coding	T cell immunoglobulin and mucin domain containing 2	2.03922	2.62465	1.50618	2.5787	0.391725	0.517004	0.856692	0.051878	0.662541	0.436474	0.131109	1.80505	69	74	32	53	8	8	5	1	11	7	2	12	53.7554	54.1553	26.3811	51.1885	6.04392	7.73273	12.823	0.671148	9.72628	6.33954	2.14754	24.4583
12	99258867	99262879	-1	ENSMUSG00000093465	Gm20682	81.216	-1.64015	0.253397	-2.52626	0.0115285	0.358822	lncRNA	predicted gene 20682	0.490192	0.955881	1.33972	0.665547	2.8495	3.21243	2.63833	6.05121	3.50459	3.66898	3.84976	4.14307	26	43	50	25	95	81	67	142	95	96	112	134	25.0346	38.2111	45.4618	25.5956	85.1769	93.087	76.5083	151.669	99.6755	103.243	122.168	108.762
13	17883188	17884449	-1	ENSMUSG00000113045	Gm48621	11.5133	-2.61121	0.638251	-2.52441	0.0115892	0.359831	TEC	predicted gene, 48621	0.059454	0.279451	0.169254	0.3356	1.41492	2.60306	1.97025	0.534884	2.32134	1.67925	1.61422	1.83978	1	4	2	4	15	21	16	4	20	14	15	19	0.966777	3.55682	1.82871	4.10941	13.4665	24.0165	18.1917	4.2686	21.0213	15.0453	16.3101	15.3776
2	98496892	98497646	-1	ENSMUSG00000075014	Gm10800	1703.47	-3.71829	1.07736	-2.52312	0.011632	0.360281	protein coding	predicted gene 10800	7.54736	2.44517	9.84355	121.302	33.0432	1494.92	1478.76	786.356	65.5623	460.371	594.599	135.954	54	15	49	616	150	5223	5195	2527	242	1649	2384	606	52.6105	13.3528	45.2754	637.043	134.997	5917.48	5857.71	2692.96	255.173	1770.04	2577.21	487.776
4	144993707	145041734	-1	ENSMUSG00000028602	Tnfrsf8	23.1966	2.4629	0.580017	2.52217	0.0116634	0.360376	protein coding	tumor necrosis factor receptor superfamily, member 8	1.2487	1.98079	1.10513	0.934278	0.708142	0.286518	0.085852	0.04646	0.190384	0.788923	0.262302	0.337063	64	86	39	34	22	7	2	1	5	20	7	10	60.3188	74.8933	35.4703	33.9847	20.0213	7.85282	2.35478	1.10143	5.12155	20.9976	7.87309	8.36919
16	75542319	75563992	-1	ENSMUSG00000032932	Hspa13	292.507	1.74559	0.295859	2.52009	0.0117325	0.361633	protein coding	heat shock protein 70 family, member 13	16.7852	12.9173	9.08844	10.193	5.5533	5.01836	2.82961	3.91629	8.73378	6.66966	3.97152	6.93744	988	614	398	415	177	128	72	107	261	194	120	212	909.093	547.601	327.062	415.714	176.04	154.214	87.0191	104.097	263.427	199.034	133.656	193.134
8	55407878	55513906	1	ENSMUSG00000031517	Gpm6a	27.4686	2.76629	0.702627	2.51384	0.0119424	0.366328	protein coding	glycoprotein m6a	2.3034	2.12833	0.825823	1.28924	0.099029	0.130901	0.129974	0	0.730792	1.00935	0.378201	0.408237	111	87	28	44	3	3	3	0	18	24	10	12	106.895	77.3099	25.4643	45.0538	2.68985	3.44674	3.42491	0	18.8867	25.8088	10.9058	9.73814
1	72198601	72251466	-1	ENSMUSG00000039395	Mreg	156.881	1.67628	0.268946	2.51456	0.0119181	0.366328	protein coding	melanoregulin	10.5309	15.5949	8.9837	9.89752	6.45733	5.36658	3.94993	3.32783	3.88318	7.85765	3.61323	6.15604	350	440	210	233	135	85	63	49	66	129	66	125	337.383	391.067	191.237	238.779	121.085	97.5519	71.8542	52.3237	69.2822	138.705	71.9288	101.377
2	31875071	31876476	1	ENSMUSG00000081480	Gm13608	25.9946	-1.97891	0.390091	-2.50945	0.0120919	0.370025	processed pseudogene	predicted gene 13608	0.261332	0.553085	0.89251	0.811416	2.65487	2.51025	2.81877	5.05928	3.67476	3.06051	4.54681	2.64207	5	9	12	11	32	23	26	43	36	29	48	31	4.83043	8.00193	10.9614	11.294	28.722	26.3263	29.5841	45.8946	37.8266	31.1693	52.2215	25.1024
10	75729247	75731775	1	ENSMUSG00000009092	Derl3	181.205	2.99049	0.793767	2.50765	0.0121536	0.371021	protein coding	Der1-like domain family, member 3	56.6848	39.2688	31.8403	31.8933	2.79503	3.33007	0.662007	1.64628	22.5377	16.9445	3.05795	9.29662	809	489	330	381	19	12	3	13	147	146	30	80	743.107	402.942	277.345	314.845	21.4461	24.7695	4.92779	10.5918	164.54	122.392	24.9095	62.6452
7	30598601	30614298	-1	ENSMUSG00000036634	Mag	6.07227	3.67022	1.06562	2.5058	0.0122176	0.37208	protein coding	myelin-associated glycoprotein	0.762743	0.748588	0.691607	0.436375	0.184181	0	0	0.063769	0	0	0.309716	0	27	19	14	8	3	0	0	1	0	0	6	0	22.5165	17.2972	13.5657	9.70054	3.18234	0	0	0.923881	0	0	5.68115	0
11	3464684	3467351	1	ENSMUSG00000075702	Selenom	33.3567	3.08426	0.833119	2.50175	0.012358	0.374132	protein coding	selenoprotein M	17.4634	14.0047	7.93525	7.12826	0.199657	0.852875	0.258279	0.564189	3.70076	6.54347	0	4.81206	142	99	44	40	1	5	1	2	16	28	0	29	144.937	90.9774	43.7592	44.5499	0.969867	4.0162	1.21715	2.29802	17.1047	29.9226	0	20.5286
9	26919067	26941361	-1	ENSMUSG00000031988	Vps26b	76.2876	2.21631	0.486266	2.50132	0.0123731	0.374132	protein coding	VPS26 retromer complex component B	4.79163	4.67519	2.94913	3.89821	0.47953	0.321677	0.42571	1.11051	1.34141	2.3663	2.57079	1.64087	254	214	112	149	14	6	11	22	37	63	57	54	229.809	175.506	93.9802	140.787	13.461	8.75354	11.5932	26.1389	35.8279	62.5308	76.6124	40.4515
9	89581259	89587121	-1	ENSMUSG00000032353	Tmed3	161.14	1.69309	0.276985	2.50226	0.0123403	0.374132	protein coding	transmembrane p24 trafficking protein 3	26.0857	18.7612	19.3813	17.9372	8.39849	7.8072	5.41888	9.10231	14.0242	14.0672	5.69655	10.7314	476	291	250	234	97	70	48	74	131	129	59	122	464.205	261.324	229.165	240.367	87.4756	78.8284	54.7548	79.4948	138.983	137.929	62.9895	98.1615
15	98622247	98626079	-1	ENSMUSG00000003355	Fkbp11	152.445	2.62527	0.651054	2.49637	0.0125472	0.378498	protein coding	FK506 binding protein 11	54.4793	41.6786	40.653	46.9367	2.90806	4.85719	1.96181	4.85867	29.1376	16.735	7.98507	19.7348	461	302	249	282	16	38	8	25	128	71	51	112	503.419	301.454	249.602	326.605	15.7282	25.4661	10.2934	22.0341	149.943	85.2048	45.8486	93.7366
6	89117976	89124370	1	ENSMUSG00000090254	Gm1965	21.099	3.14432	0.86068	2.49143	0.012723	0.382894	lncRNA	predicted gene 1965	2.85521	3.35914	1.22926	2.49187	0.396332	0	0.086446	0.374925	0.081262	1.00884	1.28363	0	87	80	30	46	6	0	1	4	1	12	17	0	71.9917	66.2953	20.5943	47.3132	5.84901	0	1.23764	4.63948	1.14106	14.0155	20.111	0
12	114502115	114502585	-1	ENSMUSG00000095200	Ighv1-7	280.245	2.92011	0.771251	2.4896	0.0127886	0.383449	IG V gene	immunoglobulin heavy variable V1-7	587.249	245.767	95.7787	83.7779	19.4305	18.0537	20.6401	22.2405	112.46	150.203	40.7644	48.1204	1742	634	199	177	37	27	31	30	173	227	69	91	1723.22	564.682	186.901	185.164	33.3794	30.0651	34.3979	32.0362	183.396	243.188	73.9081	72.5979
1	66832804	66835457	-1	ENSMUSG00000103706	6820402A03Rik	41.4237	-1.75224	0.302196	-2.48924	0.0128017	0.383449	TEC	RIKEN cDNA 6820402A03 gene	0.510483	0.451172	0.689393	0.504524	2.1918	3.37761	2.55537	3.63162	2.74582	1.8095	1.58029	2.96853	20	15	19	14	54	63	48	63	55	35	34	71	19.2703	13.3309	17.2915	14.3417	48.4268	72.3428	54.7728	67.28	57.7236	37.6362	37.0674	57.6004
1	60755959	60812518	1	ENSMUSG00000026012	Cd28	70.3843	2.68086	0.67626	2.48552	0.0129363	0.38657	protein coding	CD28 antigen	5.4519	1.87256	3.45541	2.80839	0.023976	0.28548	0.283438	0.374795	2.44309	1.06944	0.454804	1.4992	333	90	152	132	1	9	9	9	72	35	8	59	310.037	83.351	130.564	120.264	0.798032	9.21129	9.15226	10.4602	77.3714	33.5091	16.0708	43.823
6	70383453	70383976	-1	ENSMUSG00000094797	Igkv6-15	748.207	2.13354	0.456497	2.48311	0.0130239	0.387556	IG V gene	immunoglobulin kappa variable 6-15	1311.28	434.318	609.106	712.688	150.345	216.69	182.179	140.155	536.078	365.905	208.321	328.523	3137	908	1020	1217	232	264	223	153	669	448	288	505	3119.5	808.723	962.524	1276.72	209.339	292.483	246.085	163.633	710.208	479.614	307.94	401.722
7	28955748	28981337	-1	ENSMUSG00000074227	Spint2	238.684	1.59079	0.237938	2.48294	0.0130302	0.387556	protein coding	serine protease inhibitor, Kunitz type 2	43.0396	32.0539	29.5735	25.7624	11.0768	18.1302	11.3907	20.1067	16.6378	22.1941	14.3187	15.0515	699	450	341	295	115	155	95	146	138	179	132	157	690.951	402.782	315.456	311.443	104.081	165.143	103.833	158.416	148.748	196.317	142.834	124.204
12	100591044	100593052	-1	ENSMUSG00000113250	Gm48585	68.536	-1.54682	0.220844	-2.47603	0.0132853	0.394222	TEC	predicted gene, 48585	0.832803	1.38923	1.52971	1.86147	4.79774	4.9463	5.63459	5.55793	6.44448	5.26577	5.42534	7.49132	24	34	31	38	87	68	78	71	95	75	86	132	23.1455	30.2211	28.2482	38.9578	78.044	77.9983	88.9185	75.8084	99.7443	80.6357	93.6916	107.019
1	128059894	128062389	1	ENSMUSG00000104239	Gm37588	23.701	-2.1582	0.468049	-2.47453	0.0133411	0.394959	TEC	predicted gene, 37588	0.163752	0.225097	0.155198	0.500922	0.95469	1.14608	1.82091	2.21847	1.38779	1.93443	0.844607	2.99441	6	7	4	13	22	20	32	36	26	35	17	67	5.7821	6.22125	3.6412	13.3193	19.7305	22.9611	36.5083	38.4442	27.2896	37.635	18.5312	54.3485
3	51964706	51971665	-1	ENSMUSG00000104339	C130089K02Rik	81.7827	-1.89023	0.360924	-2.46652	0.0136433	0.402969	TEC	RIKEN cDNA C130089K02 gene	0.092299	0.315856	0.524503	0.573535	1.01387	1.79005	2.53045	2.90324	1.12033	1.47979	1.97221	2.25903	10	29	40	44	69	92	131	139	62	79	117	149	9.61943	25.7662	36.321	45.0115	61.846	105.851	149.745	148.496	65.024	84.9751	127.718	121.018
6	48425163	48478184	1	ENSMUSG00000029797	Sspo	11.8517	2.97063	0.799683	2.46426	0.0137297	0.404581	protein coding	SCO-spondin	0.258112	0.11052	0.279707	0.135428	0	0.061589	0.078608	0.083843	0	0	0.038104	0.041125	39	14	35	23	0	7	9	3	0	0	5	6	46.0012	15.4175	33.1225	18.1753	0	6.22792	7.95485	7.33351	0	0	4.21969	3.76739
9	72892711	72923622	1	ENSMUSG00000034563	Ccpg1	1030.5	1.55601	0.226327	2.45669	0.0140225	0.412101	protein coding	cell cycle progression 1	80.7524	57.0157	46.7691	36.63	23.9702	30.5508	25.8061	31.9966	30.3422	34.8072	21.3873	27.468	3533	2102	1387	1113	623	538	509	559	643	690	511	709	3229.17	1784.47	1242.56	1102.94	560.984	693.357	586.234	627.89	675.653	766.85	531.381	564.554
2	119857974	119873514	1	ENSMUSG00000033852	Gm28042	25.4915	-3.03904	0.83023	-2.45599	0.0140496	0.412101	protein coding	predicted gene, 28042	0	0.294052	0	0	0.449356	0.781455	0.851887	0.644226	0.557698	1.22316	1.00916	1.63506	0	20	0	0	22	29	32	22	19	47	38	78	0	17.2507	0	0	19.1441	32.3758	35.495	22.8133	22.1617	49.072	46.1034	61.4823
9	21666738	21671599	-1	ENSMUSG00000074476	Spc24	76.282	3.14345	0.873866	2.45284	0.0141734	0.413823	protein coding	SPC24, NDC80 kinetochore complex component, homolog (S. cerevisiae)	16.6364	17.3753	22.1215	22.3599	0.133534	1.42941	0.654715	0.216458	8.15985	6.10872	4.6878	3.78974	105	115	140	137	2	11	6	2	36	55	25	38	200.613	164	177.245	203.04	0.942474	9.77994	4.48288	1.28101	54.7971	40.5874	35.1251	23.4903
12	114263581	114264009	-1	ENSMUSG00000094322	Ighv9-4	70.9239	2.48566	0.60555	2.4534	0.0141513	0.413823	IG V gene	immunoglobulin heavy variable 9-4	44.5761	160.691	101.577	39.512	15.3528	4.81966	5.59705	7.80808	18.0287	19.9777	20.5209	82.4194	109	343	174	69	20	6	7	7	23	25	29	129	104.687	295.216	158.615	69.9252	21.1183	6.42669	7.46888	9.00567	23.5956	25.8689	29.9666	99.192
6	68907253	68907718	-1	ENSMUSG00000079543	Igkv13-85	368.484	3.48806	1.01692	2.44666	0.0144188	0.420027	IG V gene	immunoglobulin kappa chain variable 13-85	341.78	162.454	62.8354	1416.54	17.0209	25.4639	8.33113	6.57532	202.087	99.5961	17.0297	137.671	818	340	105	2419	26	31	10	7	252	122	24	212	813.436	302.826	99.0834	2537.71	23.4604	34.3446	11.0352	7.48649	267.522	130.609	25.6616	168.644
12	114285947	114286421	-1	ENSMUSG00000076674	Ighv3-8	81.6415	3.31431	0.950759	2.43417	0.0149259	0.433677	IG V gene	immunoglobulin heavy variable V3-8	188.002	16.5855	73.4921	27.144	5.61655	5.85517	18.1375	2.16221	39.0901	5.15346	0.571159	22.1141	574	44	157	59	11	9	28	3	62	8	1	43	567.5	39.1868	147.402	61.7007	9.92315	10.0282	31.0875	3.20316	65.7119	8.57122	1.07129	34.3123
6	68916586	68917051	1	ENSMUSG00000076538	Igkv13-84	162.851	1.86845	0.356957	2.43294	0.0149768	0.433677	IG V gene	immunoglobulin kappa chain variable 13-84	110.089	247.469	122.233	193.887	56.8555	30.3501	35.7839	33.7308	87.9884	113.576	87.131	73.1041	263	517	205	331	88	37	44	37	110	139	120	112	261.533	460.473	193.448	347.243	79.4043	40.9919	48.555	39.5715	116.776	148.809	128.308	89.0949
16	19059957	19060440	-1	ENSMUSG00000076939	Iglv3	135.284	1.58348	0.239854	2.43263	0.0149896	0.433677	IG V gene	immunoglobulin lambda variable 3	85.4414	141.117	134.556	76.3924	30.9583	39.3795	50.2175	43.705	57.0097	63.6974	66.7758	59.0404	245	352	270	156	57	57	73	57	85	93	110	108	242.519	313.52	253.768	163.282	51.432	63.4203	80.9352	60.8818	90.1157	99.6185	117.773	86.1398
1	171197667	171216166	1	ENSMUSG00000006411	Nectin4	8.19243	2.72309	0.709579	2.42833	0.0151683	0.437852	protein coding	nectin cell adhesion molecule 4	0.623704	0.339105	0.385217	0.609228	0.099493	0.076571	0	0.188449	0.081579	0.084506	0.299576	0.034179	30	14	13	21	3	2	0	4	2	2	8	1	29.2855	12.4629	12.0182	21.541	2.73429	2.03996	0	4.34258	2.13319	2.18626	8.74039	0.824912
6	68196965	68197690	1	ENSMUSG00000076518	Igkv2-112	32.4922	2.34677	0.556371	2.42063	0.0154934	0.446225	IG V gene	immunoglobulin kappa variable 2-112	61.8841	10.2	38.6868	17.901	4.80576	6.86068	9.867	13.5857	23.0215	6.05895	4.02608	10.2682	160	23	70	33	8	9	13	16	31	8	6	17	158.777	20.4843	65.9525	34.5859	7.21687	9.98749	14.3748	17.107	32.8941	8.56543	6.41863	13.5419
6	47773075	47790364	-1	ENSMUSG00000025823	Pdia4	9373.27	1.88258	0.365829	2.41255	0.0158413	0.455214	protein coding	protein disulfide isomerase associated 4	849.047	630.624	563.024	605.81	232.203	152.979	151.094	165.892	446.755	393.821	252.692	322.679	29680	18779	13829	14645	5094	2517	2543	2564	8000	6686	4857	6900	28494.5	16565.7	12555	15310.1	4561.16	2913.01	2879.26	2732.35	8349.77	7282.33	5269.52	5566.45
6	135339543	135360171	1	ENSMUSG00000030208	Emp1	15.7345	2.40872	0.584991	2.40811	0.0160354	0.459753	protein coding	epithelial membrane protein 1	0.479687	1.26639	0.890119	2.38216	0.083082	0.365047	0.57801	0.168325	0.299059	0.358126	0.561498	0.126274	19	43	25	30	2	7	11	3	6	7	12	3	17.0876	35.3103	21.0683	63.9007	1.73224	7.37821	11.6913	2.94273	5.93275	7.02909	12.4285	2.31214
12	84192905	84195263	-1	ENSMUSG00000054383	Pnma1	39.9796	-1.6671	0.277282	-2.40586	0.0161344	0.461554	protein coding	paraneoplastic antigen MA1	0.377466	0.64992	0.743066	0.778875	3.00055	2.49862	2.29966	3.53957	3.23654	2.93943	2.69488	2.28164	13	19	18	19	65	41	38	54	57	50	51	48	12.5301	16.8867	16.3893	19.4695	58.2981	47.0604	43.3455	57.6642	59.8318	53.7626	55.5859	38.9315
1	134224521	134260666	-1	ENSMUSG00000026458	Ppfia4	16.8929	2.30631	0.543711	2.40258	0.0162797	0.464665	protein coding	protein tyrosine phosphatase, receptor type, f polypeptide (PTPRF), interacting protein (liprin), alpha 4	1.31253	0.482047	1.06793	0.545362	0.435705	0.24661	0.155802	0.232341	0.083302	0.125541	0.240698	0.49636	61	18	28	17	14	11	7	7	4	1	9	16	67.7399	19.4731	36.6218	21.195	13.1616	7.2215	4.56578	5.88494	2.39425	3.56997	7.71895	13.1678
14	33907645	33923610	-1	ENSMUSG00000071531	Gprin2	25.8166	3.25989	0.941078	2.40139	0.016333	0.465142	protein coding	G protein regulated inducer of neurite outgrowth 2	0.227191	2.80744	0.157	0.303519	0.039109	0.476104	0.154304	0.083401	0.012023	0.012466	0.02244	0.394469	37	27	18	35	4	6	12	6	1	1	2	5	20.6442	199.677	9.47905	20.7685	2.07998	24.5463	7.96139	3.71929	0.608421	0.624122	1.26702	18.4248
2	92195391	92205214	-1	ENSMUSG00000040434	Large2	4.61868	3.67417	1.11684	2.39441	0.0166469	0.473026	protein coding	LARGE xylosyl- and glucuronyltransferase 2	0.51269	0.933547	0.213176	1.07688	0	0	0.027044	0	0.058638	0.364244	0	0.183901	11	11	5	7	0	0	1	0	1	6	0	1	11.1907	15.9495	3.0917	17.7003	0	0	0.335175	0	0.712783	4.38062	0	2.0633
18	66113809	66155651	-1	ENSMUSG00000041891	Lman1	974.408	2.01116	0.422576	2.39284	0.0167187	0.474006	protein coding	lectin, mannose-binding, 1	100.232	84.7455	68.3137	78.7928	17.9141	22.8339	14.5512	15.7074	49.8511	59.868	23.0745	39.2289	3145	2111	1464	1448	388	297	260	243	766	706	340	710	2887.05	1910.63	1307.42	1709.02	302.01	373.171	237.987	222.041	799.648	950.134	412.981	580.809
6	82702006	82751435	-1	ENSMUSG00000000628	Hk2	193.869	1.73608	0.30804	2.38957	0.0168683	0.477185	protein coding	hexokinase 2	7.87011	8.85769	5.1247	7.90482	1.70203	2.44062	2.70875	2.25152	5.73351	3.9098	4.19759	3.0873	426	502	255	284	91	59	82	70	171	164	84	145	472.774	416.489	204.55	357.583	59.8437	83.1863	92.3944	66.3786	191.809	129.41	156.683	95.33
12	114900733	114901164	-1	ENSMUSG00000094652	Ighv1-42	89.7626	2.45297	0.608327	2.38847	0.0169188	0.477554	IG V gene	immunoglobulin heavy variable V1-42	154.069	101.532	43.2152	113.382	4.43778	12.7856	5.59705	16.7964	37.6625	57.7614	18.398	80.3083	377	217	74	198	7	12	7	15	48	62	26	107	349.848	180.458	65.1773	193.874	5.89802	16.4726	7.21648	18.718	47.5789	72.2161	25.9587	93.7347
4	108494663	108637995	-1	ENSMUSG00000034557	Zfyve9	4.69871	3.46734	1.03352	2.38732	0.0169717	0.477987	protein coding	zinc finger, FYVE domain containing 9	0.149557	0.254518	0.076619	0.154886	0	0.090916	0.04513	0	0	0.020233	0	0.017712	15	20	5	11	0	4	2	0	0	1	0	1	13.739	18.301	4.67673	10.7145	0	4.73879	2.35408	0	0	1.02409	0	0.836369
15	59520199	59528948	1	ENSMUSG00000032501	Trib1	588.784	1.54079	0.227001	2.38231	0.0172044	0.48029	protein coding	tribbles pseudokinase 1	31.0728	17.9413	21.864	18.7488	9.90937	7.6246	11.9265	13.033	16.1346	10.5904	11.2382	10.9001	1973	943	948	829	359	198	332	325	488	300	349	390	1763.92	797.194	824.683	801.466	329.248	245.581	384.429	363.098	510.074	331.246	396.412	318.06
4	138032041	138039939	1	ENSMUSG00000028757	Ddost	681.184	1.53118	0.222908	2.38297	0.0171735	0.48029	protein coding	dolichyl-di-phosphooligosaccharide-protein glycotransferase	59.3766	49.1847	47.1637	45.8567	17.1404	21.5191	20.8938	20.5729	38.4627	33.0015	20.9198	32.0785	1817	1278	1015	994	330	314	307	279	602	499	352	600	1751.96	1135.92	924.643	1018.88	296.01	360.256	350.05	297.908	632.008	536.516	383.542	486.52
3	105634583	105708652	-1	ENSMUSG00000068798	Rap1a	873.087	1.50332	0.211148	2.38374	0.0171378	0.48029	protein coding	RAS-related protein 1a	86.9931	99.2097	57.9928	61.0019	30.7111	32.515	36.1623	36.732	54.7639	46.2877	34.426	45.4103	1851	1447	1094	1049	573	441	454	472	630	628	537	816	2145.29	1915.05	950.285	1132.81	443.307	455.167	506.378	444.552	752.103	628.96	527.521	575.614
6	29348068	29377109	1	ENSMUSG00000029767	Calu	889.142	1.46947	0.196992	2.38319	0.0171633	0.48029	protein coding	calumenin	103.185	90.1167	84.5999	89.1459	35.6592	35.4229	44.3538	42.6719	49.0902	69.4644	55.2666	54.0359	2383	1641	1143	1241	568	417	487	450	613	629	534	688	2150.77	1470.25	1171.67	1399.24	435.037	418.93	524.944	436.515	569.832	797.775	715.796	578.945
1	39410573	39517836	-1	ENSMUSG00000003134	Tbc1d8	7.46308	3.23219	0.938174	2.3793	0.0173457	0.483174	protein coding	TBC1 domain family, member 8	0.363297	0.623046	0.54507	0.34523	0	0.061888	0.273934	0.04371	0.028763	0.274411	0	0	22	28	21	15	0	2	2	1	1	7	0	0	17.5638	23.5769	17.5093	12.5683	0	1.69761	7.51981	1.0371	0.774414	7.3097	0	0
10	79762877	79790852	1	ENSMUSG00000019564	Arid3a	836.605	1.4631	0.194846	2.37676	0.0174655	0.485448	protein coding	AT rich interactive domain 3A (BRIGHT-like)	45.1536	43.0928	35.6553	40.9343	18.2729	13.4857	17.5189	27.3688	29.4459	25.837	20.4092	22.8399	2173	1741	1173	1239	523	311	350	410	648	703	503	681	1969.36	1471.12	1033.27	1344.41	466.465	333.722	433.853	585.823	715.208	620.891	553.103	512.04
12	113680290	113680723	-1	ENSMUSG00000096670	Ighv2-6	43.7019	2.56704	0.6604	2.37287	0.0176506	0.489526	IG V gene	immunoglobulin heavy variable 2-6	38.6324	18.3473	131.012	29.3667	12.1112	6.46066	5.62707	1.8018	46.4998	6.42781	9.96071	8.31956	94	39	223	51	19	8	7	2	59	8	14	13	93.4383	34.7342	210.375	53.4862	17.145	8.86606	7.72789	2.13875	62.6325	8.56598	14.9697	10.3432
6	68839249	68840015	-1	ENSMUSG00000076535	Igkv1-88	64.9902	2.54888	0.653604	2.36976	0.0177997	0.491517	IG V gene	immunoglobulin kappa chain variable 1-88	1.92347	49.4102	159.973	104.139	9.56142	5.30894	15.8579	15.2034	49.4941	15.0686	14.0186	14.4215	5	112	291	193	16	7	21	18	67	20	21	24	4.96098	99.7494	274.151	202.26	14.4339	7.76909	23.2238	19.2444	71.0905	21.414	22.4665	19.1193
18	61058690	61121224	1	ENSMUSG00000024617	Camk2a	25.9729	2.43086	0.603788	2.36981	0.0177974	0.491517	protein coding	calcium/calmodulin-dependent protein kinase II alpha	1.71024	1.02281	1.41365	3.06179	0.208376	0.839388	0.946694	0.277142	0.676465	0.597571	0	0.304129	94	32	53	46	10	19	18	3	16	9	0	9	67.5602	31.6258	37.1052	91.0797	4.81792	18.8138	21.2348	5.373	14.8818	13.0066	0	6.17547
6	88170873	88184014	1	ENSMUSG00000015053	Gata2	11.5196	3.46069	1.04115	2.36343	0.0181066	0.498912	protein coding	GATA binding protein 2	0.191879	0.955039	1.39391	1.48871	0	0.415323	0.501647	0.048174	0	0	0	0.139793	9	38	46	50	0	7	4	1	0	0	0	4	7.36256	28.6835	35.5381	43.0155	0	9.04206	10.9296	0.907186	0	0	0	2.75719
9	123507504	123613395	1	ENSMUSG00000029530	Ccr9	43.7988	2.29827	0.549698	2.36179	0.0181871	0.500048	protein coding	chemokine (C-C motif) receptor 9	0.496017	3.14771	2.5781	4.08759	0.041162	0.910513	0.523238	1.00211	0.846018	0.738718	0.309823	1.41376	24	128	86	125	1	27	15	22	23	20	8	47	23.966	119.043	82.767	148.723	1.16405	24.9612	14.355	23.7625	22.7643	19.6661	9.30167	35.1119
6	67838137	67838643	1	ENSMUSG00000076508	Igkv17-127	324.349	2.42554	0.60382	2.36087	0.0182323	0.500208	IG V gene	immunoglobulin kappa variable 17-127	89.7548	242.795	1152.48	97.8646	72.2435	76.2334	52.9564	65.8058	75.0668	203.867	91.9217	111.576	230	541	2056	178	119	99	69	77	99	266	136	182	227.9	481.532	1940.34	186.498	107.405	109.637	76.1361	82.1882	106.099	284.286	145.208	144.961
6	70680562	70681161	1	ENSMUSG00000095682	Igkv3-1	132.022	3.2224	0.942822	2.35718	0.0184144	0.503039	IG V gene	immunoglobulin kappa variable 3-1	334.213	176.588	10.6138	45.5129	19.4264	19.2542	9.96833	10.2982	37.5269	91.0798	4.74617	6.10322	855	394	19	83	32	25	13	12	50	119	7	10	848.715	350.92	17.9047	87.0037	28.8674	27.7358	14.3702	12.8315	53.0585	127.409	7.48738	7.96478
5	37123448	37146549	-1	ENSMUSG00000039474	Wfs1	96.9232	1.79121	0.335552	2.35795	0.0183763	0.503039	protein coding	wolframin ER transmembrane glycoprotein	5.39057	4.80917	2.84829	3.32444	1.80247	1.28357	1.42008	1.3002	1.94398	3.00353	0.858138	2.55973	291	234	115	130	65	35	39	33	57	85	27	83	293.455	204.921	103.027	136.282	57.4318	39.6468	43.8961	34.7374	58.935	90.0908	29.0277	71.6273
9	103879743	103921017	1	ENSMUSG00000032558	Nphp3	58.2999	-2.12635	0.478624	-2.35331	0.0186071	0.507212	protein coding	nephronophthisis 3 (adolescent)	1.11022	0.260696	0.38903	0.210262	2.17781	1.88607	4.67882	4.55373	3.05655	1.91003	2.02087	5.51796	29	16	25	12	88	59	41	95	55	46	42	90	49.1153	9.02713	11.4353	7.00451	56.3903	47.3415	117.53	98.8674	75.303	46.5573	55.5512	125.476
19	12438143	12442647	1	ENSMUSG00000046805	Mpeg1	424.037	1.78939	0.33577	2.35099	0.0187236	0.509298	protein coding	macrophage expressed gene 1	16.3686	15.4911	17.611	13.8515	8.2016	4.35931	2.0219	3.52028	10.767	9.93115	6.3971	7.16772	1083	869	820	649	341	137	64	103	364	324	232	289	1042.4	772.172	745.187	664.252	305.703	157.514	73.1119	110.022	381.852	348.469	253.137	234.629
7	4340723	4348163	1	ENSMUSG00000062524	Ncr1	7.30321	2.79486	0.764487	2.3478	0.0188845	0.51258	protein coding	natural cytotoxicity triggering receptor 1	0.897833	1.94476	0.98166	0.563192	0	0	0.207028	0.224634	0.58457	0.201487	0.361751	0.244107	18	34	14	8	0	0	2	2	6	2	4	3	17.4428	29.573	12.6718	8.23927	0	0	2.28378	2.14178	6.32458	2.15679	4.36695	2.43769
17	34512047	34527044	-1	ENSMUSG00000092415	Gm20513	16.6618	-2.66666	0.711346	-2.34297	0.0191307	0.518158	lncRNA	predicted gene 20513	0.19167	0.668568	3.05509	0.269959	9.39853	7.9931	10.5037	20.045	1.48566	4.57757	6.79367	7.33888	1	3	10	1	30	19	26	46	4	12	20	24	0.954985	2.60734	10.114	1.01287	27.4082	22.5963	29.716	49.0148	4.12227	12.5666	21.0328	18.7954
5	36174524	36555483	-1	ENSMUSG00000029093	Sorcs2	78.2651	1.98068	0.418966	2.34071	0.0192472	0.520206	protein coding	sortilin-related VPS10 domain containing receptor 2	4.11862	3.99779	2.35143	3.45613	1.1177	0.515369	1.19782	0.934627	1.47444	1.46077	3.02553	0.606047	306	219	121	172	35	14	30	32	50	40	46	13	223.389	169.723	84.7424	141.161	35.4824	15.8602	36.8898	24.8788	44.5362	43.6549	101.967	16.8964
12	114023465	114023941	-1	ENSMUSG00000095642	Ighv14-3	347.161	2.52853	0.653581	2.3387	0.019351	0.520808	IG V gene	immunoglobulin heavy variable V14-3	213.657	361.082	585.22	154.627	25.4533	39.4413	11.402	29.9147	150.961	122.175	107.778	137.26	668	980	1280	344	51	62	18	42	245	194	193	273	660.069	872.788	1201.28	359.6	46.0092	69.1121	19.9945	44.8342	259.635	207.898	206.825	217.894
2	148713642	148717612	-1	ENSMUSG00000027447	Cst3	664.939	1.44331	0.189617	2.3379	0.0193922	0.520808	protein coding	cystatin C	191.777	127.697	130.524	126.171	74.8583	67.8502	79.7891	86.1185	85.2036	81.2129	80.8586	70.0078	1913	1117	861	889	480	340	336	387	453	419	466	448	1862.12	970.512	842.095	922.533	425.432	373.803	439.906	410.382	460.729	434.488	487.851	349.411
7	30450896	30455559	1	ENSMUSG00000046056	Sbsn	23.947	-2.2667	0.541676	-2.33848	0.0193623	0.520808	protein coding	suprabasin	0.118035	0.236461	0.402842	0.752607	3.33527	1.14987	4.47228	3.86847	2.11032	1.5493	0.78038	2.46131	4	7	10	17	28	19	36	42	19	11	14	41	2.83942	4.45236	6.43891	13.3153	46.96	15.6945	61.0877	45.6708	28.2711	20.535	11.6647	30.4344
3	55532616	56091122	-1	ENSMUSG00000027799	Nbea	52.2346	2.17094	0.501258	2.336	0.0194912	0.521293	protein coding	neurobeachin	0.933621	1.64868	1.05137	1.05941	0.134889	1.01465	0.437086	0.106868	0.338724	0.375516	0.104547	0.498936	161	140	109	92	12	42	18	5	19	32	6	42	108.519	149.996	81.1989	92.7282	9.17677	66.9164	28.8474	6.09617	21.9258	24.0494	7.55079	29.8097
6	3325742	3327855	-1	ENSMUSG00000107017	Gm43196	79.5802	-1.73462	0.314478	-2.33598	0.0194922	0.521293	TEC	predicted gene 43196	0.426161	1.50567	1.86455	1.85117	5.52305	8.3184	7.91949	9.61609	4.80698	3.84792	5.06751	6.06044	13	39	40	40	106	121	116	130	75	58	85	113	12.5348	34.6643	36.4396	41.0015	95.0822	138.823	132.265	138.81	78.7389	62.3604	92.616	91.6272
10	61906902	61908141	1	ENSMUSG00000046687	Gm5424	6.76004	2.6653	0.713843	2.33287	0.0196551	0.523631	processed pseudogene	predicted gene 5424	0.829445	1.90332	1.21015	0.906486	0.5134	0.538432	0.126939	0.145831	0.474197	0.393987	0	0.105211	14	27	14	11	5	4	1	1	4	3	0	1	13.5308	23.9987	12.7977	11.2972	4.48709	4.5719	1.13634	1.06666	4.20269	3.22253	0	0.808929
9	58781970	58943724	-1	ENSMUSG00000032340	Neo1	16.6645	2.19286	0.511355	2.33274	0.0196619	0.523631	protein coding	neogenin	0.625688	0.297397	0.320981	0.392724	0.124514	0.054964	0.175322	0.054177	0.23819	0.072881	0.158722	0.17131	72	29	26	32	9	3	7	2	14	3	10	12	63.9298	23.7844	21.7913	30.2166	7.44634	3.18642	10.1715	2.71667	13.5533	4.10297	10.077	8.9972
9	51200986	51240224	-1	ENSMUSG00000036027	1810046K07Rik	37.4372	2.92938	0.830033	2.32446	0.0201007	0.532198	protein coding	RIKEN cDNA 1810046K07 gene	2.3406	8.51573	7.22722	9.12308	0.176879	0	0.366656	0	2.06753	2.69951	1.00938	3.54199	42	130	91	116	2	0	3	0	19	24	10	39	40.3239	114.833	82.7304	118.356	1.78357	0	3.58673	0	19.8363	25.6248	10.8053	31.3661
6	67993702	67994472	1	ENSMUSG00000095497	Igkv1-122	43.9639	2.73901	0.748138	2.32445	0.0201014	0.532198	IG V gene	immunoglobulin kappa chain variable 1-122	78.5672	34.1461	29.6356	22.7961	5.9169	0	2.0541	1.51868	14.6135	16.2809	7.83597	29.2891	228	86	60	47	11	0	3	2	22	24	13	54	224.937	76.3584	56.2063	49.0305	9.89415	0	3.31668	2.12937	23.2508	25.6285	13.877	42.9384
9	123762161	123768729	-1	ENSMUSG00000025804	Ccr1	101.106	2.00009	0.430275	2.32431	0.020109	0.532198	protein coding	chemokine (C-C motif) receptor 1	6.18257	7.56697	5.88135	5.27119	3.17674	0.449699	0.942685	1.02059	3.30259	3.17956	2.64221	3.0781	260	270	174	157	84	9	19	19	71	66	61	79	250.47	239.949	158.315	160.808	75.3263	10.3369	21.6849	20.2916	74.5103	70.9733	66.5124	64.0984
4	154140706	154224665	-1	ENSMUSG00000029026	Trp73	13.0388	3.07239	0.892149	2.32292	0.0201836	0.533066	protein coding	transformation related protein 73	1.32646	0.684513	0.292457	0.568952	0.021838	0	0.403211	0	0.100978	0.427496	0.068719	0.090089	59	43	15	16	1	0	6	0	4	10	1	4	66.7881	26.9773	9.78423	21.5721	0.643567	0	11.5277	0	2.83144	11.8599	2.14997	2.3316
7	37797409	37806959	-1	ENSMUSG00000002068	Ccne1	76.6431	1.78657	0.338812	2.32156	0.0202566	0.533886	protein coding	cyclin E1	6.91803	7.64717	8.03627	6.99108	3.3748	2.55863	1.50912	1.25878	2.7953	4.51602	4.88191	3.13703	170	180	117	142	38	35	15	16	41	64	77	55	171.497	148.384	132.37	130.507	48.9668	35.9884	21.2425	15.3146	38.5904	61.6839	75.1994	39.9735
6	71105150	71121423	-1	ENSMUSG00000054474	Thnsl2	7.07988	4.37477	1.45637	2.31725	0.02049	0.538921	protein coding	threonine synthase-like 2 (bacterial)	0.902691	2.69352	0.402133	1.79517	0	0	0	0	0	0	1.64339	0.063352	27	20	8	21	0	0	0	0	0	0	4	1	13.4932	31.5141	3.99396	20.2067	0	0	0	0	0	0	15.2639	0.486757
15	101152150	101172676	1	ENSMUSG00000023034	Nr4a1	1603.85	-1.53439	0.23081	-2.31528	0.0205975	0.540632	protein coding	nuclear receptor subfamily 4, group A, member 1	23.3058	17.3241	40.9218	34.8083	139.75	80.4788	138.101	185.831	130.602	66.0414	96.839	109.85	785	509	965	821	2925	1220	2020	2574	2199	1027	1710	2184	731.606	425.671	853.547	822.828	2567.7	1433.42	2461.58	2862.93	2283.18	1142.28	1888.92	1772.52
1	127742528	127782768	-1	ENSMUSG00000051590	Map3k19	292.871	-1.48136	0.208685	-2.30664	0.0210749	0.552024	protein coding	mitogen-activated protein kinase kinase kinase 19	1.1239	1.92547	3.74691	3.72741	9.6843	9.04119	10.3177	13.4625	11.1039	9.70861	7.5618	9.33177	74	120	194	190	438	310	330	420	378	314	297	395	75.6405	101.431	167.555	188.906	381.48	345.248	394.287	444.663	416.177	360.017	316.228	322.825
8	3507105	3517680	-1	ENSMUSG00000069633	Pex11g	18.4266	2.16491	0.507393	2.29587	0.0216832	0.566791	protein coding	peroxisomal biogenesis factor 11 gamma	1.44222	2.06348	1.82294	0.662135	0.261045	0.24637	0.195708	0.529686	0.412812	1.15861	0.597993	0.499492	42	21	24	20	7	5	4	10	9	14	14	13	46.0345	51.5539	38.6619	15.9151	4.87692	4.46188	3.54703	8.29755	7.33802	20.3765	11.8603	8.19518
7	141073049	141119770	-1	ENSMUSG00000025512	Chid1	242.307	1.63223	0.275794	2.29239	0.0218834	0.570851	protein coding	chitinase domain containing 1	19.6973	15.3832	11.0417	20.0688	6.91822	4.58179	8.73822	6.09235	10.9442	6.46031	10.2653	8.53239	486	319	257	324	161	100	137	136	169	142	190	203	642.036	392.472	239.137	492.589	131.985	84.7357	161.726	97.4577	198.66	116.023	207.908	142.955
11	106285476	106378678	-1	ENSMUSG00000020715	Ern1	328.79	1.83295	0.363672	2.2904	0.0219981	0.572671	protein coding	endoplasmic reticulum (ER) to nucleus signalling 1	22.7063	13.7288	13.4266	10.6314	4.04525	3.15223	6.17343	2.98656	8.37414	12.5375	5.46122	8.32584	1237	721	442	415	131	102	114	105	221	223	141	244	1137.6	538.378	446.959	401.092	118.622	89.6068	175.62	73.4334	233.646	346.094	170.013	214.412
X	13332349	13355552	1	ENSMUSG00000051228	Nyx	27.1487	2.23415	0.539085	2.28934	0.0220594	0.573094	protein coding	nyctalopin	0.401001	0.960908	1.1039	1.4511	0.11967	0.131986	0.078622	0.113384	0.318871	0.406743	0.617549	0.452595	32	65	62	82	6	5	3	4	13	16	27	22	30.7924	57.755	56.3233	83.9086	5.37849	5.75049	3.42807	4.27295	13.636	17.2091	29.4658	17.8643
5	88667668	88675750	-1	ENSMUSG00000067149	Jchain	19748.2	3.85321	1.24872	2.2849	0.0223184	0.578643	protein coding	immunoglobulin joining chain	4938.06	2725.06	2790.55	2889.13	10.904	8.8821	4.26703	8.72155	902.191	1012.13	285.118	546.287	94064	44235	37432	39163	130	82	47	74	8856	9604	3013	6447	92602.2	39999.1	34770.7	40798.5	119.682	94.5063	45.4356	80.2673	9421.91	10457.9	3322.31	5265.8
X	93579080	93585749	-1	ENSMUSG00000025151	Maged1	65.6395	2.26542	0.555072	2.27974	0.0226229	0.585346	protein coding	MAGE family member D1	6.01992	5.70301	3.18323	5.13583	1.23451	1.70665	0.976989	0.053962	2.50873	3.53294	1.17486	0.956867	252	200	85	134	11	34	12	1	42	73	27	23	203.473	150.879	71.4894	130.719	24.4224	32.7295	18.7504	0.895118	47.2221	65.795	24.6747	16.6244
1	173550993	173569313	-1	ENSMUSG00000073490	Ifi207	8.87191	2.68192	0.738575	2.27725	0.022771	0.587982	protein coding	interferon activated gene 207	0.021247	0.938375	0.724772	0.721839	0.168986	0.089342	0.133066	0.04801	0.083137	0.172234	0.116161	0.174147	1	41	24	24	5	2	3	1	2	4	3	5	0.970366	33.5446	21.9936	24.7622	4.51716	2.31511	3.4507	1.07609	2.11448	4.33406	3.29643	4.08819
15	37366419	37792814	-1	ENSMUSG00000051359	Ncald	28.0657	2.88466	0.829826	2.27116	0.0231376	0.596237	protein coding	neurocalcin delta	4.43594	1.13135	2.4418	2.37441	0.055673	1.08429	1.45612	0	1.34753	0.1229	0.225884	0.148833	86	46	63	45	1	17	10	0	12	3	7	4	132.898	26.53	48.6071	53.5672	0.976228	18.4313	24.7704	0	22.4825	2.02872	4.205	2.29196
12	100406956	100410919	-1	ENSMUSG00000113864	Gm48381	17.6126	-2.26215	0.556547	-2.26783	0.0233395	0.600225	TEC	predicted gene, 48381	0.099634	0.039166	0.165184	0.140692	0.396339	0.559176	0.242895	1.05122	0.682421	0.740756	1.27205	1.00797	6	2	7	6	15	16	7	28	21	22	42	37	5.77592	1.77719	6.36267	6.14178	13.448	18.3925	7.99533	29.908	22.0314	23.6608	45.8211	30.0359
6	144939561	145021910	-1	ENSMUSG00000030268	Bcat1	53.9286	2.35687	0.598794	2.266	0.0234512	0.600672	protein coding	branched chain aminotransferase 1, cytosolic	2.69561	3.71217	2.08632	2.92087	0.169139	0.315274	0.278148	0.258937	1.13248	2.86746	0.72224	0.839759	104	89	57	84	4	14	13	14	36	56	21	23	135.851	146.434	69.8625	110.848	4.98917	9.01516	7.9595	6.4044	31.7843	79.624	22.617	21.7539
8	26210064	26214914	1	ENSMUSG00000031570	Plpp5	121.651	1.98894	0.436397	2.26615	0.0234423	0.600672	protein coding	phospholipid phosphatase 5	19.1237	12.6809	13.7229	12.7506	4.46379	1.62626	1.63772	5.38303	8.81268	11.4762	3.35561	7.33569	402	237	165	162	57	22	23	48	116	86	39	85	387.935	201.348	184.965	194.773	52.9991	18.7179	18.8639	53.5912	99.5565	128.27	42.2967	76.4902
2	148278560	148285483	-1	ENSMUSG00000027435	Cd93	143.139	1.75653	0.33403	2.26486	0.0235215	0.601262	protein coding	CD93 antigen	4.68219	1.58018	3.32595	3.56468	0.797516	1.17783	1.35076	1.17721	1.43342	1.87688	1.09079	2.72175	486	139	243	262	52	58	67	54	76	96	62	172	467.523	123.501	220.662	268.032	46.6092	66.7291	76.584	57.6884	79.7082	103.26	67.6777	139.695
2	92430052	92445595	1	ENSMUSG00000027221	Chst1	390.908	4.01592	1.33241	2.26351	0.0236044	0.602172	protein coding	carbohydrate sulfotransferase 1	50.9897	35.7436	19.7454	23.0704	0.160646	0	0.158035	0.057039	10.5712	9.31045	1.37973	2.81324	2019	1201	550	647	4	0	3	1	214	182	30	68	1944.74	1067.06	500.385	662.592	3.58614	0	3.42245	1.06765	224.533	195.655	32.6982	55.1523
17	52073671	52078471	-1	ENSMUSG00000103779	Gm36931	195.752	-1.88268	0.390264	-2.26175	0.0237127	0.603725	TEC	predicted gene, 36931	0.325801	0.400329	2.3918	2.30216	7.26326	7.16893	5.79976	10.9333	4.33317	4.8148	5.40045	7.35776	24	25	124	120	336	251	204	356	163	175	218	330	23.0967	22.2138	112.663	122.804	301.206	288.638	233.083	380.284	170.983	188.221	237.89	267.945
11	118191895	118246566	-1	ENSMUSG00000017466	Timp2	19.5288	2.23941	0.548981	2.25766	0.0239668	0.608978	protein coding	tissue inhibitor of metalloproteinase 2	0.498892	1.86165	1.5699	0.88058	0.786938	0.149956	0.111667	0.322221	0.278923	0.924203	0.227431	0.292246	28	65	62	35	6	4	3	8	8	12	7	10	21.7085	63.4062	45.3894	28.8539	20.042	3.70226	2.759	6.88108	6.75902	22.1581	6.14924	6.53658
14	20886728	20893453	1	ENSMUSG00000021822	Plau	8.60546	2.62163	0.719576	2.25359	0.0242219	0.613645	protein coding	plasminogen activator, urokinase	0.643894	0.379269	0.749011	1.23963	0.418774	0.245703	0	0.198209	0.286172	0.059257	0.106522	0.047912	22	11	18	30	9	4	0	3	5	1	2	1	21.1992	9.77377	16.3852	30.7332	8.0698	4.58982	0	3.20264	5.24696	1.07494	2.17918	0.810828
1	93333662	93406537	-1	ENSMUSG00000034088	Hdlbp	2510.9	1.47066	0.208886	2.25319	0.0242469	0.613645	protein coding	high density lipoprotein (HDL) binding protein	110.053	87.3421	77.3847	74.8417	38.8731	37.4445	36.4601	39.7763	65.4969	60.324	39.8552	54.1146	7236	4715	3649	3500	1483	1179	1003	1109	2071	1835	1454	2078	6730.11	4180.76	3144.38	3446.49	1391.39	1299.24	1266.03	1193.78	2230.58	2032.6	1514.45	1701.04
6	69260778	69261303	-1	ENSMUSG00000076548	Igkv4-69	31.3077	2.63359	0.726194	2.24952	0.0244795	0.617418	IG V gene	immunoglobulin kappa variable 4-69	10.3912	99.434	32.2098	12.3831	4.62556	6.53072	3.2502	1.82189	3.18741	33.3369	7.19334	9.05758	25	209	54	21	7	8	4	2	4	41	10	14	24.8577	186.148	50.9525	22.0284	6.3162	8.86409	4.41479	2.13893	4.24625	43.8957	10.6924	11.1374
9	83430380	83520854	1	ENSMUSG00000032261	Sh3bgrl2	31.9097	2.04916	0.466439	2.24931	0.024493	0.617418	protein coding	SH3 domain binding glutamic acid-rich protein like 2	0.772822	2.25243	2.76062	2.81081	1.03637	0.671898	0.467881	0.120459	0.840309	1.07399	0.339472	1.15416	54	79	79	100	6	18	5	2	30	37	13	19	30.6238	69.8618	72.6851	83.8733	24.0366	15.1064	10.5273	2.3426	18.5436	23.4488	8.35858	23.5085
12	41501667	41536430	-1	ENSMUSG00000036295	Lrrn3	33.6655	2.73714	0.773307	2.24638	0.0246795	0.620889	protein coding	leucine rich repeat protein 3, neuronal	1.94439	1.12635	1.76938	1.99901	0	0.358928	0.106911	0.07712	0.867796	0.933718	0.031106	0.643523	114	56	73	83	0	10	3	2	26	27	1	23	109.753	49.7643	66.361	84.9688	0	11.4953	3.42658	2.13637	27.2788	29.0395	1.091	18.6713
17	25593259	25652757	-1	ENSMUSG00000024112	Cacna1h	291.104	2.41858	0.632338	2.24338	0.0248721	0.6245	protein coding	calcium channel, voltage-dependent, T type, alpha 1H subunit	14.0653	7.50229	9.80629	6.37366	0.336251	2.24434	0.442122	3.319	4.38305	4.769	2.66771	3.16452	1674	599	586	524	27	34	27	52	243	183	140	155	1143.82	477.541	529.871	390.309	16.0047	103.556	20.4152	132.463	198.499	213.686	134.802	132.28
6	70051008	70051587	-1	ENSMUSG00000076576	Igkv6-32	214.96	2.25994	0.562208	2.24105	0.0250229	0.62705	IG V gene	immunoglobulin kappa variable 6-32	363.78	236.811	140.474	64.4549	28.0935	56.4821	28.1196	39.6994	83.1869	68.6317	120.324	88.8978	966	548	261	122	48	76	38	48	115	93	184	151	957.964	488.115	245.791	127.814	43.3007	84.3916	42.046	51.3067	121.994	99.5809	196.883	120.332
6	69203838	69204417	-1	ENSMUSG00000076545	Igkv4-72	195.88	2.54895	0.692904	2.23544	0.0253883	0.633712	IG V gene	immunoglobulin kappa chain variable 4-72	326.596	152.959	86.8096	73.8726	33.7666	49.9716	4.37592	29.8803	105.345	25.5954	25.7496	71.929	1035	421	192	167	69	80	7	43	173	41	47	145	1022.4	374.968	180.15	174.533	62.2469	89.2032	7.77776	45.9033	183.337	43.9337	50.3743	115.734
3	98067946	98071485	1	ENSMUSG00000043468	Adam30	36.0566	-2.43135	0.640203	-2.23577	0.0253669	0.633712	protein coding	a disintegrin and metallopeptidase domain 30	0.075574	0.155939	0.349067	0.966306	3.15202	1.51154	1.42061	6.90715	2.25509	0.382995	2.31398	2.40546	4	7	13	10	72	23	36	81	61	10	25	47	2.68086	4.32976	8.22749	25.8123	65.4435	30.4228	28.6141	120.248	44.5492	7.48573	51.0045	43.8608
14	45457174	45520182	1	ENSMUSG00000049092	Gpr137c	172.948	-1.76756	0.343587	-2.23395	0.0254861	0.634909	protein coding	G protein-coupled receptor 137C	0.571197	1.42059	3.16014	1.46998	4.47578	5.67422	10.4877	11.8031	9.11984	3.82279	4.90751	10.7103	43	58	135	75	204	160	198	268	189	112	193	284	31.0194	60.3846	114.028	60.1136	142.264	174.837	323.394	314.574	275.81	114.385	165.599	298.971
18	65548070	65548594	1	ENSMUSG00000118078	Gm50228	41.7017	-1.67239	0.301288	-2.23173	0.025633	0.63732	lncRNA	predicted gene, 50228	3.18053	3.46518	6.24948	5.03923	28.754	19.7418	15.6343	18.9592	19.2544	17.3972	13.7274	24.7139	16	15	22	18	92	49	39	43	50	44	39	78	15.6662	13.3598	20.4535	18.6914	82.8975	55.1737	43.727	45.8316	52.8165	47.2155	42.0147	62.5727
12	35547973	35585037	-1	ENSMUSG00000019256	Ahr	319.907	1.66421	0.298001	2.22888	0.0258221	0.640771	protein coding	aryl-hydrocarbon receptor	10.5213	15.5605	14.9961	13.8354	5.93542	2.97595	3.00944	3.91456	8.9592	6.22654	6.88209	10.9887	646	731	486	569	226	98	49	125	231	255	185	391	575.189	665.846	544.724	569.565	189.92	92.3093	93.418	105.027	272.763	187.555	233.781	308.79
1	36587720	36597430	-1	ENSMUSG00000026121	Sema4c	6.91652	3.04818	0.920965	2.22395	0.0261519	0.645181	protein coding	sema domain, immunoglobulin domain (Ig), transmembrane domain (TM) and short cytoplasmic domain, (semaphorin) 4C	0.490766	0.700335	0.025831	0.518847	0.057838	0.152965	0.036555	0.039488	0.035567	0	0.165713	0.189327	27	34	1	21	2	4	1	1	1	0	5	1	22.2865	24.8934	0.779429	17.7427	1.5373	3.9413	0.942589	0.880068	0.899481	0	4.67599	4.41936
6	69281818	69282389	-1	ENSMUSG00000076549	Igkv4-68	225.789	2.48334	0.666641	2.22509	0.0260752	0.645181	IG V gene	immunoglobulin kappa variable 4-68	328.075	240.721	115.055	90.0432	24.8807	34.0076	20.337	26.2596	174.765	66.8061	19.3411	62.7602	1002	639	246	196	49	52	31	36	277	104	34	122	990.653	569.099	230.961	204.972	44.2031	57.9406	34.4183	38.438	293.584	111.426	36.424	97.3511
19	8966648	9054278	1	ENSMUSG00000069833	Ahnak	6356.21	1.38821	0.174512	2.22454	0.0261119	0.645181	protein coding	AHNAK nucleoprotein (desmoyokin)	75.4351	124.065	107.613	83.2172	46.995	35.9076	51.8949	58.7499	49.9924	58.4532	71.9468	45.6267	10719	13908	10099	7597	4543	2701	4142	3467	3887	4387	5287	4977	10633.5	13688.8	10079.2	8833.43	3877.34	2871.9	4153.69	4064.35	3924.5	4539.98	6301.8	3305.98
13	52658416	52685315	-1	ENSMUSG00000047842	Diras2	94.7915	1.67513	0.304028	2.22062	0.0263769	0.648361	protein coding	DIRAS family, GTP-binding RAS-like 2	2.17914	3.67903	4.00588	2.88493	0.867022	0.688388	1.53777	1.38616	0.933	1.8233	2.38597	1.45308	160	229	207	150	40	24	54	45	35	66	96	65	153.979	203.479	188.075	153.506	35.8579	27.5987	61.698	48.0696	36.7141	70.9862	104.759	52.7769
3	89153273	89157213	1	ENSMUSG00000042747	Krtcap2	256.793	1.51915	0.233794	2.22053	0.0263826	0.648361	protein coding	keratinocyte associated protein 2	51.7391	42.7714	45.4178	35.6111	16.4108	19.5453	23.7533	15.4967	26.1425	34.7574	18.4658	24.1177	619	460	377	388	146	121	146	106	191	205	157	161	659.967	427.039	384.936	342.06	122.521	141.458	172.041	97.0117	185.706	244.282	146.36	158.131
GL456212.1	31967	34932	-1	ENSMUSG00000094915		10.0064	2.93387	0.87177	2.21832	0.0265329	0.650798	protein coding		13.3704	15.1404	3.77534	11.3229	2.73821	5.69577	0	4.37563	0	3.06996	1.37072	0	36	35	7	21	5	8	0	5	0	4	2	0	35.5367	31.0322	6.56184	21.8998	4.48979	8.84256	0	5.31992	0	4.26339	2.13022	0
9	122752137	122760093	1	ENSMUSG00000057895	Zfp105	9.11538	3.4445	1.10233	2.21756	0.0265846	0.650811	protein coding	zinc finger protein 105	0.901701	2.1464	0.986356	0.538548	0.110231	0	0	0	0	0.631541	0	0.453768	26	29	20	11	2	0	0	0	0	9	0	8	22.9997	42.853	16.7168	10.3442	1.64568	0	0	0	0	8.87572	0	5.9494
2	160205623	160208985	-1	ENSMUSG00000074622	Mafb	5.50639	3.35731	1.06427	2.21495	0.0267636	0.653935	protein coding	v-maf musculoaponeurotic fibrosarcoma oncogene family, protein B (avian)	0.23731	0.326416	0.674546	0.251314	0	0.124774	0.123889	0	0.154772	0	0	0	12	14	24	9	0	3	3	0	4	0	0	0	11.5504	12.4355	21.8148	9.2111	0	3.44576	3.4239	0	4.19518	0	0	0
12	115944322	115944754	-1	ENSMUSG00000094940	Ighv1-84	28.1648	2.59016	0.718361	2.21359	0.0268567	0.654954	IG V gene	immunoglobulin heavy variable 1-84	17.1128	55.7369	56.355	8.26956	0	3.23586	9.08445	6.22093	12.8578	4.92199	3.53808	24.8245	42	119	97	14	0	4	11	7	16	6	5	39	41.7686	106.054	91.5587	14.6908	0	4.43639	12.153	7.48997	16.9964	6.4287	5.34985	31.0517
5	67914919	67916673	-1	ENSMUSG00000106859	Gm42737	39.9667	-1.74313	0.336074	-2.2112	0.0270217	0.657717	TEC	predicted gene 42737	0.404228	0.618482	1.60989	0.8559	3.46767	4.82388	3.19399	6.10553	3.47594	4.74058	3.01	2.9061	10	13	28	15	54	57	38	67	44	58	41	44	9.64947	11.5562	25.5347	15.3855	48.45	65.3361	43.2928	71.5286	46.2089	62.3519	44.647	35.6588
13	34310731	34314449	-1	ENSMUSG00000045136	Tubb2b	81.9797	1.95116	0.430916	2.2073	0.0272931	0.663054	protein coding	tubulin, beta 2B class IIB	7.18985	7.34628	6.88147	4.99515	1.01193	1.31916	2.41766	0.68061	2.68488	4.36159	4.43751	2.53685	227	197	153	112	20	20	37	10	43	68	77	49	218.851	175.096	139.36	114.793	17.9394	22.9491	42.193	10.6779	45.1414	73.1137	83.9067	39.7353
8	94899292	94900196	1	ENSMUSG00000031762	Mt2	22.8324	4.35739	1.52505	2.20149	0.0277015	0.664106	protein coding	metallothionein 2	27.4277	11.0989	16.6273	8.19134	0	0	0	0	1.60918	7.01953	0.734828	0	132	46	56	28	0	0	0	0	4	17	2	0	128.346	40.6522	51.6979	28.8643	0	0	0	0	4.19347	18.0985	2.13663	0
2	84810805	84813976	1	ENSMUSG00000027073	Prg2	121.252	3.68825	1.21964	2.20413	0.0275151	0.664106	protein coding	proteoglycan 2, bone marrow	48.9474	31.2342	44.859	35.0793	0	0.206448	1.02598	0	10.1174	12.0351	6.2836	6.30193	490	267	315	249	0	1	5	0	52	60	35	39	475.668	237.583	289.655	256.706	0	1.13832	5.66134	0	54.7541	64.4415	37.943	31.4793
17	29333119	29367954	1	ENSMUSG00000064147	Rab44	11.4466	3.3152	1.05131	2.2022	0.0276513	0.664106	protein coding	RAB44, member RAS oncogene family	0	1.40195	0.830598	3.76323	0	0.331463	0.444008	0.427509	0.207944	0.097358	0.114657	0	0	12	33	24	0	4	12	3	6	3	1	0	0	28.0494	14.1069	72.436	0	4.80723	6.44432	5.36298	2.96008	1.37118	1.82108	0
11	115238533	115258582	-1	ENSMUSG00000034586	Hid1	91.0923	3.19957	0.99849	2.2029	0.0276019	0.664106	protein coding	HID1 domain containing	11.3092	6.75504	4.56894	3.72445	0	1.98015	0.1721	0.093136	2.62379	2.25124	0.638489	1.10036	516	258	151	128	0	12	4	2	59	47	17	33	451.704	211.184	121.254	112.02	0	44.8746	3.90309	1.82565	58.3616	49.5434	15.8462	22.591
11	97306359	97393228	1	ENSMUSG00000049807	Arhgap23	9.9476	3.06479	0.937066	2.20347	0.0275619	0.664106	protein coding	Rho GTPase activating protein 23	0.568468	0.668817	0.227881	0.470902	0.022955	0	0	0.256236	0	0.204785	0.026318	0.294841	45	51	12	30	1	0	0	4	0	7	1	4	33.6281	30.9681	8.95699	20.9768	0.794786	0	0	7.43905	0	6.67477	0.967398	8.96528
6	21985915	22256403	1	ENSMUSG00000062980	Cped1	12.8777	2.35377	0.613995	2.20485	0.0274645	0.664106	protein coding	cadherin-like and PC-esterase domain containing 1	0.742557	1.4445	0.822168	0.893938	0.062634	0.237743	0.072519	0.077174	0.276344	0.68312	0.33839	0.489729	39	52	14	22	1	6	1	3	7	13	6	5	26.467	40.2998	19.4713	23.9936	1.30667	4.80798	1.46769	1.34998	5.48532	13.4157	7.49449	8.97241
7	49408863	49423723	1	ENSMUSG00000039745	Htatip2	96.6938	1.57044	0.258861	2.20366	0.0275485	0.664106	protein coding	HIV-1 Tat interactive protein 2	15.4661	14.2535	11.0422	12.2374	3.9366	7.20568	7.82988	8.7109	7.80179	6.99273	3.50214	6.98064	279	218	129	150	37	61	58	65	67	62	28	69	248.383	179.173	117.83	147.994	37.0033	65.6592	71.4004	68.6568	69.7767	61.8769	34.9481	57.6254
1	74414354	74425221	1	ENSMUSG00000026177	Slc11a1	9.21888	3.59072	1.18075	2.19413	0.0282264	0.674149	protein coding	solute carrier family 11 (proton-coupled divalent metal ion transporters), member 1	1.36363	1.67439	0.716505	2.0343	0	0.331126	0	0.059342	0.072516	0	1.76514	0	46	16	17	12	0	6	0	1	1	0	4	0	24.9908	24.0187	8.72491	28.0743	0	3.44316	0	0.533738	0.740103	0	20.1007	0
4	140241796	140393323	-1	ENSMUSG00000040964	Arhgef10l	6.6372	3.0727	0.944347	2.19485	0.0281741	0.674149	protein coding	Rho guanine nucleotide exchange factor (GEF) 10-like	0.812167	0.445944	1.06475	0.155411	0.035014	0	0.411973	0.298423	0.043066	0.249498	0	0.036081	25	20	10	5	1	0	1	6	1	7	0	1	25.2031	10.8318	21.9542	3.63165	0.635966	0	7.25913	4.54487	0.744245	4.26597	0	0.575527
11	99123587	99134911	-1	ENSMUSG00000035849	Krt222	115.317	1.89868	0.409916	2.19235	0.028354	0.67593	protein coding	keratin 222	12.8199	10.5101	16.6362	10.7297	3.28841	2.86981	4.01013	1.01887	4.18157	6.04934	7.80224	9.24427	335	224	232	181	46	18	49	14	67	95	78	108	287.317	184.372	247.736	181.084	43.1362	36.4931	51.0319	11.2067	52.1906	74.701	108.04	106.495
5	75735576	75817382	1	ENSMUSG00000005672	Kit	16.025	2.70107	0.776642	2.19029	0.0285034	0.678222	protein coding	KIT proto-oncogene receptor tyrosine kinase	1.86987	0.920605	0.791971	1.333	0	0.224347	0.963187	0.539404	0.121228	0.597965	0.038329	0.160575	148	63	45	43	0	5	8	4	5	3	1	1	64.6405	24.9101	18.1911	34.7005	0	4.4004	18.9063	9.15137	2.33384	11.3896	0.823326	2.85331
6	148743990	148797735	-1	ENSMUSG00000030309	Caprin2	59.2551	-1.73305	0.334812	-2.18943	0.0285655	0.678431	protein coding	caprin family member 2	0.278431	0.923993	1.27579	1.08884	2.65849	5.27145	5.49279	3.6274	2.87894	2.93141	4.28856	4.31005	16	27	31	32	62	81	82	99	55	34	81	75	9.79427	25.441	29.8189	28.8423	54.7353	105.212	109.712	62.6224	56.3978	56.8162	93.738	77.9319
15	97642651	97665853	-1	ENSMUSG00000022469	Rapgef3	93.3448	2.19572	0.547749	2.18296	0.0290385	0.687101	protein coding	Rap guanine nucleotide exchange factor (GEF) 3	14.6547	6.34016	8.10085	6.54854	1.76576	0.928815	3.54461	1.77863	10.0949	3.49196	1.16955	1.24164	455	171	172	168	32	6	12	16	67	94	40	40	379.211	128.415	139.282	127.603	26.7433	13.6368	52.0808	22.5876	145.472	49.7869	18.805	16.5149
3	51895052	51897268	-1	ENSMUSG00000102147	Gm38055	13.4368	-2.3529	0.619719	-2.18308	0.0290299	0.687101	TEC	predicted gene, 38055	0.06219	0.109878	0.088426	0.351196	0.79087	0.782815	0.971728	2.17555	0.851222	0.4406	0.791948	1.93373	2	3	2	8	16	12	15	31	14	7	14	38	1.9281	2.66641	1.82156	8.19913	14.3512	13.7704	17.1063	33.102	14.6969	7.52649	15.2564	30.8163
13	34794810	34796229	-1	ENSMUSG00000113185	Gm47127	40.978	-1.86015	0.39419	-2.18208	0.0291035	0.687362	lncRNA	predicted gene, 47127	0.368695	0.938537	1.22463	2.51467	4.19165	5.50654	3.81663	8.70504	5.87748	6.19711	5.44814	10.4048	6	13	14	29	43	43	30	63	49	50	49	104	5.80182	11.56	12.8045	29.7983	38.6065	49.1649	34.1022	67.2275	51.5067	53.7313	53.2714	84.1606
12	114116800	114117264	-1	ENSMUSG00000076652	Ighv7-3	167.483	2.53071	0.70301	2.17737	0.0294529	0.694326	IG V gene	immunoglobulin heavy variable 7-3	171.728	114.861	388.526	82.2969	12.0144	23.6312	22.011	12.7366	63.1233	26.5079	141.584	47.7168	444	259	703	152	20	31	29	15	85	35	211	79	440.607	230.671	662.352	159.305	18.0422	34.4013	32.0668	16.0378	90.1935	37.4737	225.722	62.9302
4	57943373	57956411	-1	ENSMUSG00000028367	Txn1	212.092	1.63271	0.291093	2.17359	0.0297363	0.699709	protein coding	thioredoxin 1	36.2605	41.6815	38.812	32.2498	9.32292	12.6876	12.2993	12.2028	22.9469	33.8887	16.6673	18.1438	487	477	366	307	79	82	80	73	158	226	124	150	471.522	424.25	335.346	315.796	70.9575	93.6114	90.814	77.8765	166.176	242.809	134.673	121.276
3	103767111	103819563	1	ENSMUSG00000027843	Ptpn22	772.648	1.51501	0.237037	2.17269	0.029804	0.700008	protein coding	protein tyrosine phosphatase, non-receptor type 22 (lymphoid)	46.6088	49.6123	46.678	44.7803	23.2532	14.7749	14.3671	17.9882	35.7269	34.0408	19.9384	29.3132	1854	1607	1228	1198	538	265	258	308	609	621	439	693	1692.93	1410.49	1126.53	1224.82	494.347	304.491	296.308	320.655	722.673	681.258	449.999	547.283
6	70348423	70348977	1	ENSMUSG00000095794	Igkv6-17	601.092	2.55576	0.716742	2.1706	0.0299614	0.702411	IG V gene	immunoglobulin kappa variable 6-17	150.789	1563.5	326.473	454.44	67.7632	74.6587	70.0921	57.0815	78.5592	464.049	114.745	267.413	424	3824	642	910	122	106	100	73	115	664	185	480	419.872	3406.04	603.721	952.776	110.081	117.878	110.812	77.9775	121.938	711.204	198.055	382.75
3	51664545	51669509	-1	ENSMUSG00000102732	Gm37342	17.7555	-2.15106	0.531126	-2.16721	0.0302186	0.707137	TEC	predicted gene, 37342	0.039319	0.061844	0.223469	0.074033	0.521487	0.662523	0.602953	0.918986	0.384801	0.21269	0.81326	0.580893	3	4	12	4	25	24	22	31	15	8	34	27	2.88695	3.55419	10.9021	4.0933	22.4108	27.6005	25.1376	33.1149	15.7343	8.60447	37.1035	21.9235
9	44880870	44891729	-1	ENSMUSG00000002033	Cd3g	32.4033	2.44877	0.669071	2.16535	0.0303609	0.709165	protein coding	CD3 antigen, gamma polypeptide	6.62515	4.18423	4.2074	7.53258	0.244158	0.05625	2.06679	0.665364	1.20195	2.21405	3.11422	2.62699	86	47	39	72	2	1	13	11	8	17	25	21	102.155	50.5001	43.106	87.4625	2.20351	0.492117	18.0953	5.03507	10.3211	18.8103	29.8377	20.821
11	33996920	34042295	1	ENSMUSG00000002699	Lcp2	50.7189	2.61722	0.747857	2.16247	0.0305818	0.711712	protein coding	lymphocyte cytosolic protein 2	4.68127	5.18978	3.37659	2.76158	0.457394	0.603547	0.26353	0	2.61423	2.84332	0.132416	0.918101	194	149	93	68	10	10	5	0	23	57	4	23	163.716	142.064	78.4627	72.7271	9.36257	11.9761	5.23313	0	50.9149	54.789	2.8775	16.5042
7	78563172	78570144	1	ENSMUSG00000039236	Isg20	167.736	1.93628	0.432862	2.16301	0.0305404	0.711712	protein coding	interferon-stimulated protein	43.168	25.4619	25.2215	29.8327	7.39863	6.23136	2.51868	10.6295	24.1667	21.3687	12.8149	11.2807	575	300	247	243	63	40	17	66	148	148	99	92	557.606	257.434	216.468	290.182	55.9364	45.6697	18.4732	67.3842	173.844	152.085	102.856	74.8994
6	69354928	69355456	-1	ENSMUSG00000076550	Igkv4-63	45.4102	2.45163	0.671754	2.16096	0.0306984	0.713122	IG V gene	immunoglobulin kappa variable 4-63	76.401	88.0108	58.8061	14.705	5.74435	3.19605	10.7509	27.581	26.5039	47.1521	8.44547	2.53254	188	163	81	21	6	4	9	21	30	45	12	4	155.632	140.328	79.5933	22.5566	6.84886	3.69394	12.435	27.5731	30.0665	52.8543	10.6898	2.65175
15	99518377	99549537	-1	ENSMUSG00000023015	Racgap1	193.848	2.31995	0.611213	2.15956	0.0308066	0.714332	protein coding	Rac GTPase-activating protein 1	16.7976	25.9857	17.2021	23.0914	3.08364	2.50126	0.477983	4.16334	9.32153	10.7937	8.59381	8.64087	435	562	325	393	48	48	10	33	121	153	105	99	422.814	511.973	287.703	437.689	45.4302	35.7225	6.83158	51.431	130.667	149.698	134.412	111.799
6	56046789	56629472	-1	ENSMUSG00000004347	Pde1c	15.5336	-2.56494	0.725366	-2.15744	0.0309711	0.716839	protein coding	phosphodiesterase 1C	0	0.144791	0.072964	0.118157	0.557597	0.735863	0.372994	0.538483	1.4243	1.0787	0.120474	1.03042	0	12	1	5	21	29	14	11	25	22	7	34	0	6.10069	2.60973	4.78959	17.5681	22.4752	11.4008	14.2259	42.6978	31.9941	4.02967	28.5116
1	93439801	93549698	1	ENSMUSG00000034066	Farp2	107.428	1.60779	0.282077	2.15469	0.0311864	0.720513	protein coding	FERM, RhoGEF and pleckstrin domain protein 2	7.02836	4.83433	3.5187	6.06281	2.30722	3.45637	1.75659	3.69633	2.80299	2.77637	1.62455	2.73797	342	190	117	192	66	74	39	72	63	64	41	72	308.745	166.223	102.704	200.555	59.3217	86.1482	43.8148	79.6885	68.5713	67.1993	44.3433	61.8234
1	54557769	54559429	-1	ENSMUSG00000104136	Gm36955	88.892	-1.71435	0.331732	-2.1534	0.0312874	0.721537	TEC	predicted gene, 36955	0.990157	2.07693	3.30693	1.94453	4.58133	9.27807	10.3782	19.1129	7.23442	6.17842	9.92505	8.71839	23	41	54	32	67	103	116	197	86	71	127	124	22.1996	36.4479	49.2634	32.8298	60.1189	118.026	132.12	210.304	90.3276	76.3237	138.269	100.474
9	110883554	110886587	-1	ENSMUSG00000043953	Ccrl2	25.6551	2.04696	0.486925	2.15015	0.0315434	0.722751	protein coding	chemokine (C-C motif) receptor-like 2	3.8197	1.40759	1.98654	1.15015	0.441091	1.66073	0.75187	0.851318	0.813828	0.458136	0.555476	0.740524	111	36	37	24	10	21	13	10	15	6	11	12	111.104	32.0468	38.3933	25.1922	7.50943	27.4081	12.4179	12.1527	13.1828	7.34235	10.0396	11.0718
5	31025356	31036524	1	ENSMUSG00000038828	Tmem214	464.189	1.4575	0.212806	2.14985	0.0315671	0.722751	protein coding	transmembrane protein 214	30.863	20.3428	22.0633	20.1568	11.3539	9.19336	10.872	11.9164	16.5686	15.5977	11.4491	13.5911	1243	737	579	624	277	228	242	250	376	348	268	373	1298.17	669.754	616.627	638.451	279.522	219.406	259.662	245.99	388.111	361.49	299.237	293.851
5	138271917	138278267	-1	ENSMUSG00000029510	Gpc2	15.8889	-1.95771	0.445321	-2.15061	0.0315071	0.722751	protein coding	glypican 2 (cerebroglycan)	0.210302	0.181879	0.224237	0.222423	0.90836	1.39386	1.26851	1.76841	1.02626	0.691314	0.745149	1.46426	5	10	6	6	21	19	27	16	18	13	11	33	6.97026	4.71843	4.93821	5.55132	17.6214	26.2122	24.031	28.7652	18.9425	12.6247	15.3461	24.9459
11	69287345	69289060	-1	ENSMUSG00000045377	Tmem88	18.2464	-2.39238	0.647092	-2.15175	0.0314168	0.722751	protein coding	transmembrane protein 88	0.22769	0.214291	0.323922	0.385653	2.31415	1.14278	1.7026	2.66746	2.0463	0.184043	4.62725	2.00721	5	4	5	6	32	12	18	26	23	2	56	27	4.8272	3.55604	4.56299	6.15688	28.7158	13.7465	20.496	27.7543	24.16	2.14987	60.957	21.8737
9	121588396	121600808	1	ENSMUSG00000013419	Zfp651	22.881	2.62752	0.759007	2.14427	0.032011	0.731598	protein coding	zinc finger protein 651	1.68706	2.96708	0.973476	0.243503	0.407479	0.793594	0.212226	0.091798	0.238269	0.612003	0	0.583236	91	77	19	17	2	15	10	4	12	9	0	11	71.665	98.6543	27.4764	7.7892	10.1312	19.1273	5.11894	1.91377	5.63664	14.3242	0	12.735
9	66065505	66179524	1	ENSMUSG00000032380	Dapk2	18.9902	2.68641	0.787945	2.14026	0.0323338	0.737652	protein coding	death-associated protein kinase 2	3.64163	3.89292	0.85301	0.620812	0.89032	1.44241	0.468866	0	0.234415	0.821025	0.15552	0.221097	83	66	15	11	14	17	5	0	3	9	2	3	81.9865	68.6013	12.7602	10.5249	11.732	18.4254	5.99378	0	2.93905	10.1846	2.17562	2.55863
1	72298326	72323473	-1	ENSMUSG00000026189	Pecr	38.6339	1.93362	0.436438	2.13917	0.0324216	0.73833	protein coding	peroxisomal trans-2-enoyl-CoA reductase	9.52077	9.56656	4.19825	3.74592	1.32181	1.43926	1.85711	2.18913	3.57693	3.7486	3.56692	3.54709	131	108	46	34	13	8	14	12	23	29	27	34	128.179	100.812	37.5554	37.9767	10.4158	10.9943	14.1968	14.4643	26.8184	27.8072	29.8393	24.5469
3	28317363	28730007	1	ENSMUSG00000027692	Tnik	326.07	-1.56447	0.26405	-2.13773	0.0325387	0.739675	protein coding	TRAF2 and NCK interacting kinase	1.75998	6.07387	8.72423	6.01207	19.3188	32.4792	23.5056	25.943	17.4545	19.6095	23.5536	16.5835	82	204	213	167	351	486	378	385	273	362	374	391	59.1943	159.9	194.966	152.268	380.305	619.81	448.9	428.226	326.932	363.397	492.243	286.7
5	138192576	138193883	1	ENSMUSG00000049285	Mblac1	9.46616	2.41129	0.6611	2.13476	0.032781	0.743853	protein coding	metallo-beta-lactamase domain containing 1	1.76551	1.33874	1.13481	1.68782	0.180748	0.356412	1.06218	0.512532	0.444794	0.229865	0.515658	0	31	20	14	21	2	3	9	4	4	2	5	0	29.9518	17.7769	12.7919	21.562	1.79474	3.4307	10.2318	4.26728	4.20229	2.14865	5.43578	0
1	87825262	87828254	1	ENSMUSG00000103591	Gm38365	198.989	-1.58171	0.272962	-2.1311	0.0330813	0.749333	TEC	predicted gene, 38365	1.09807	2.74714	3.94971	2.75281	9.90892	9.37352	16.5101	16.7079	10.3462	6.72039	6.492	10.5409	49	104	124	87	278	199	353	330	236	148	159	287	47.1974	92.4227	112.801	89.0998	249.283	228.597	402.942	352.443	247.653	159.156	173.387	232.886
13	22226630	22227114	-1	ENSMUSG00000069301	H2ac11	186.415	1.72365	0.339713	2.13019	0.0331557	0.749683	protein coding	H2A clustered histone 11	69.5158	103.314	136.448	107.327	24.6636	16.6383	24.9523	35.4166	60.5507	83.3121	55.9051	48.8191	307	393	421	336	69	36	55	71	138	185	140	136	301.324	350.079	392.318	349.494	62.1936	40.4243	61.5317	75.695	145.891	198.474	150.598	108.958
13	75987987	75998273	1	ENSMUSG00000021591	Glrx	67.4756	1.54802	0.25757	2.12767	0.0333646	0.75307	protein coding	glutaredoxin	7.14429	7.64959	7.15634	7.9397	3.19671	2.098	3.58525	2.7763	4.96206	3.70086	4.276	4.88452	123	121	92	105	38	34	45	31	49	34	45	63	143.559	120.315	95.5478	120.14	37.597	23.9197	40.9068	27.3789	55.5276	40.9747	53.3898	50.4512
4	137114577	137115693	-1	ENSMUSG00000101493	2810405F17Rik	30.8846	-1.7701	0.362502	-2.1244	0.0336368	0.757871	lncRNA	RIKEN cDNA 2810405F17 gene	1.17317	1.05335	1.17918	0.778967	5.14266	8.32753	6.27672	4.18592	4.44344	5.14554	3.3669	4.48849	17	13	12	8	47	58	44	27	33	37	27	40	16.4508	11.5614	10.9867	8.22545	42.2079	66.2558	49.9765	28.8071	34.6995	39.7558	29.3364	32.3524
10	63086711	63088294	1	ENSMUSG00000112411	Gm19337	51.5776	-1.66614	0.313697	-2.12351	0.0337113	0.758207	TEC	predicted gene, 19337	0.6366	1.65834	2.07006	0.834361	3.82723	7.41732	6.70608	5.94186	5.50808	4.5025	6.51826	4.75093	14	31	32	13	53	78	71	58	62	49	79	64	13.5161	27.5592	29.2029	13.3398	47.5605	89.3532	80.8457	61.9135	65.1267	52.6718	85.9933	51.849
14	30853010	30861081	1	ENSMUSG00000071547	Nt5dc2	9.67927	2.94752	0.918536	2.12025	0.0339851	0.761674	protein coding	5'-nucleotidase domain containing 2	0.762419	2.07092	1.13856	1.02244	0	0	0.552253	0	0.447059	0.385503	0	0.436177	20	27	21	19	0	0	7	0	6	5	0	7	18.0396	38.3537	17.8997	18.2173	0	0	7.41953	0	5.89079	5.02577	0	5.30487
3	88483183	88495726	1	ENSMUSG00000041355	Ssr2	316.188	1.56563	0.266745	2.12051	0.0339631	0.761674	protein coding	signal sequence receptor, beta	71.5854	59.919	50.7373	50.5401	16.0712	19.0897	19.7775	28.1886	39.3544	40.4283	31.7098	37.3899	919	632	476	488	127	122	93	132	274	271	171	314	852.328	558.415	401.391	453.138	111.998	128.961	133.708	164.716	260.946	265.221	234.598	228.831
12	114620973	114621406	-1	ENSMUSG00000103254	Ighv1-15	388.988	2.85872	0.877092	2.11918	0.0340749	0.762343	IG V gene	immunoglobulin heavy variable 1-15	74.0668	220.375	248.091	1452.07	32.3324	28.9179	47.1752	34.9415	65.844	95.893	35.3808	435.318	181	471	425	2536	51	36	59	39	84	120	50	684	179.888	419.49	400.902	2659.43	46.0218	39.9019	65.1425	41.7031	89.1738	128.492	53.4643	544.249
15	74866726	74869880	-1	ENSMUSG00000075602	Ly6a	786.203	1.4345	0.205204	2.11743	0.0342234	0.764323	protein coding	lymphocyte antigen 6 complex, locus A	155.648	162.44	157.443	140.159	77.2423	83.7011	52.0646	61.2626	81.8216	124.528	66.9362	110.012	1786	1577	1263	1144	555	456	292	308	470	682	422	769	1712.25	1398.71	1150.81	1161.07	497.344	522.438	325.216	330.749	501.265	754.799	457.714	622.076
6	145184393	145186953	-1	ENSMUSG00000107756	Gm44164	362.562	-1.59172	0.280605	-2.10873	0.034968	0.779584	TEC	predicted gene, 44164	2.33516	3.81467	9.54406	7.15588	21.646	17.8322	26.7824	40.3876	19.6701	12.1996	21.3059	27.2929	88	122	253	191	513	320	484	674	379	227	441	628	84.7977	108.426	230.282	195.678	460.069	367.411	552.232	719.773	397.786	244.093	480.748	509.443
12	114217237	114217671	-1	ENSMUSG00000103939	Ighv3-4	13.6781	3.65942	1.26382	2.10427	0.0353552	0.786839	IG V gene	immunoglobulin heavy variable V3-4	0	17.1257	28.8662	33.4155	4.38945	0	2.37346	0	0	0.790413	7.69994	0	0	37	50	59	7	0	3	0	0	1	11	0	0	32.8959	47.0686	61.751	6.30478	0	3.30728	0	0	1.06876	11.7414	0
2	126435587	126461219	-1	ENSMUSG00000027360	Hdc	9.60592	2.41304	0.672116	2.10237	0.0355209	0.788972	protein coding	histidine decarboxylase	0.315233	0.514518	1.32031	0.44141	0.18244	0.181878	0.150341	0.130875	0	0.492548	0.052044	0.141122	13	18	34	13	5	5	4	4	0	9	1	4	13.6428	17.4294	37.9671	14.3856	4.62139	4.46615	3.69451	2.77977	0	11.7453	1.39956	3.1394
2	62494629	62524453	1	ENSMUSG00000026893	Gca	64.244	1.94526	0.449749	2.10175	0.035575	0.788972	protein coding	grancalcin	9.06952	3.33346	8.36649	2.81052	3.08178	1.55511	0.959837	1.67114	1.99423	3.73124	1.20215	4.30075	99	82	83	39	40	37	23	37	51	42	33	32	236.778	68.1181	145.131	55.2529	47.0909	23.0355	14.2285	21.4117	28.9939	53.6724	19.5014	57.7137
9	75533023	75545053	1	ENSMUSG00000032184	Lysmd2	46.3832	2.18795	0.566347	2.09757	0.0359434	0.795011	protein coding	LysM, putative peptidoglycan-binding, domain containing 2	7.78462	7.2818	8.73451	8.52281	3.64918	1.46426	0.264495	0.861985	2.35167	7.75804	1.12822	2.80822	118	97	96	92	36	11	2	6	19	58	10	27	117.187	85.8004	87.365	96.613	32.1524	12.5066	2.26081	6.36825	19.7148	64.3478	10.5532	21.7295
12	99609352	99613480	1	ENSMUSG00000113136	Gm19951	237.373	-1.80812	0.385324	-2.09724	0.0359722	0.795011	lncRNA	predicted gene, 19951	1.51008	4.73327	12.4174	9.47155	22.2778	31.2744	47.2969	62.0422	16.2718	18.6254	25.4256	40.9235	27	72	156	120	251	268	408	493	149	165	251	449	26.0938	64.0192	142.57	123.246	225.314	306.625	464.062	526.145	156.585	177.331	272.997	363.487
6	108805602	108836317	1	ENSMUSG00000030104	Edem1	2634.3	1.93945	0.448731	2.09356	0.0362989	0.799456	protein coding	ER degradation enhancer, mannosidase alpha-like 1	214.695	130.843	103.734	100.041	33.9018	25.1332	29.8106	42.5408	92.3921	98.723	41.3619	72.2326	8912	5272	3631	3589	1045	745	686	751	2069	1975	1083	1952	9668.51	4612.1	3103.97	3392.57	893.59	642.19	762.278	940.206	2317.12	2449.61	1157.41	1672.05
12	69793622	69838041	-1	ENSMUSG00000020990	Cdkl1	27.1583	-2.13872	0.543864	-2.09376	0.0362816	0.799456	protein coding	cyclin-dependent kinase-like 1 (CDC2-related kinase)	0.295628	0.778991	1.26156	0.536517	2.82198	4.83475	6.14321	6.43409	0.742745	2.9837	7.33564	3.06132	7	11	21	9	28	32	29	35	9	21	36	26	4.50681	9.29535	12.7788	6.15912	25.18	41.8193	53.1769	48.1382	6.30577	25.0622	69.4881	23.9889
19	12824046	12824788	1	ENSMUSG00000091014	Gm5244	21.4641	-2.09663	0.524497	-2.09082	0.0365439	0.802133	protein coding	predicted pseudogene 5244	1.06038	0.137773	1.68064	1.32906	7.26215	2.66824	4.82312	9.47428	7.33694	4.25012	9.50028	4.7507	9	1	10	8	39	11	20	36	32	18	45	25	8.75083	0.889944	9.21556	8.25933	35.0777	12.4937	22.6006	38.3719	33.7161	19.3254	48.7162	20.1522
3	153179381	153180291	-1	ENSMUSG00000104964	4930597L12Rik	12.6232	-2.40012	0.669659	-2.09079	0.0365465	0.802133	TEC	RIKEN cDNA 4930597L12 gene	0	0.419266	0.89204	0.378411	4.24776	2.22272	0.552246	4.40887	2.78843	2.15735	2.73714	4.0574	0	4	7	3	30	12	3	22	16	12	17	28	0	3.56134	6.43215	3.09236	26.9806	13.6861	3.40292	23.4812	16.8519	12.8995	18.4569	22.6329
10	75619647	75634418	-1	ENSMUSG00000001663	Gstt1	9.18413	2.81608	0.869674	2.08823	0.0367768	0.805798	protein coding	glutathione S-transferase, theta 1	1.86899	2.37802	1.9515	2.64533	0.786428	0	0	0	0.443089	1.91224	0.546687	0.122992	26	27	19	25	7	0	0	0	3	6	4	1	22.4316	22.3398	15.5626	23.9082	5.52449	0	0	0	2.96156	12.6456	4.07701	0.758767
11	5226324	5394847	-1	ENSMUSG00000041961	Znrf3	60.6242	1.86376	0.413772	2.08752	0.0368409	0.805816	protein coding	zinc and ring finger 3	2.28521	2.06685	3.21257	1.03342	1.26133	0.367443	1.64666	0.699472	0.619071	0.901574	0.333191	1.06993	202	156	139	71	22	15	36	15	29	39	17	58	156.258	110.62	145.957	53.2113	50.4803	14.2556	63.933	23.4728	23.5739	33.967	14.1565	37.6053
7	92383374	92390676	-1	ENSMUSG00000074024	4632427E13Rik	315.969	-1.51856	0.248684	-2.0852	0.0370514	0.809029	lncRNA	RIKEN cDNA 4632427E13 gene	1.99274	2.6391	4.25935	5.94073	13.7807	15.152	18.3882	22.1708	9.80105	11.8699	14.8035	10.4658	153	183	226	151	443	348	299	398	295	271	269	463	99.518	103.161	141.336	223.41	402.812	429.338	521.43	543.389	272.583	326.618	459.373	268.659
6	38264331	38276194	-1	ENSMUSG00000047749	Zc3hav1l	20.2317	-2.11957	0.537337	-2.08355	0.0372013	0.810912	protein coding	zinc finger CCCH-type, antiviral 1-like	0.019698	0.116216	0.153917	0.055636	0.533077	0.31139	0.556454	1.15887	0.366344	0.439702	0.179852	0.582354	2	10	11	4	34	15	27	52	19	22	10	36	1.92401	8.885	9.98912	4.09217	30.4755	17.2571	30.8615	55.5516	19.9272	23.6637	10.9156	29.238
X	151819162	151820571	-1	ENSMUSG00000047238	Mageh1	17.6866	2.42735	0.685303	2.0828	0.0372692	0.811003	protein coding	MAGE family member H1	3.43804	2.93996	1.92729	1.76444	0.330752	0.979023	0.216111	0	1.93299	0.841469	0.188822	1.10429	66	48	26	24	4	9	2	0	19	8	2	13	63.7541	42.6725	23.7466	24.6386	3.58986	10.3008	2.27551	0	19.9619	8.59757	2.1757	10.5259
10	79613106	79618464	1	ENSMUSG00000020325	Fstl3	16.6312	2.09823	0.527641	2.08139	0.0373979	0.811031	protein coding	follistatin-like 3	2.1247	2.94238	1.16069	1.58147	0.815103	0.390252	0.096906	0.735827	0.603923	0.848566	1.26984	0.533157	47	59	19	26	11	4	1	7	7	9	15	7	45.2474	49.0463	16.4237	25.3613	10.1598	4.71543	1.17179	7.69045	7.16232	9.95688	16.8034	5.8362
15	102143373	102165952	-1	ENSMUSG00000001288	Rarg	26.2385	2.02467	0.492186	2.08188	0.0373534	0.811031	protein coding	retinoic acid receptor, gamma	1.09435	2.70392	3.07869	2.89084	1.40733	0.731494	0.259413	0.786454	0.194597	1.22255	0.588848	1.55204	44	59	49	31	26	14	5	14	4	14	13	15	30.9004	59.7601	57.7607	61.4673	23.2586	11.7192	4.15916	10.8984	3.05999	19.0203	10.3314	22.5262
10	68987264	69127621	1	ENSMUSG00000019944	Rhobtb1	131.654	2.63584	0.787496	2.07726	0.0377773	0.817865	protein coding	Rho-related BTB domain containing 1	10.2518	7.32975	4.95142	12.9178	0.709968	0.411863	0.883584	0.4302	9.02143	1.38054	1.92766	2.09924	419	280	188	232	17	13	21	7	108	46	38	71	421.449	235.855	135.249	399.896	17.0829	9.60679	20.6252	8.67955	206.537	31.2705	49.2408	44.3595
19	4214323	4225478	-1	ENSMUSG00000075289	Carns1	332.26	-1.45455	0.219221	-2.07349	0.0381263	0.824019	protein coding	carnosine synthase 1	4.41697	4.23534	6.44872	5.89143	19.7707	17.2681	21.2895	34.6491	12.0709	15.468	23.2547	19.3822	116	161	231	159	415	386	445	476	279	316	434	451	165.172	123.668	160.218	166.201	432.965	366.802	452.586	635.733	251.438	318.924	540.671	372.737
7	119701576	119720215	1	ENSMUSG00000030917	Tmem159	7.28121	2.38848	0.671624	2.06734	0.0387019	0.835042	protein coding	transmembrane protein 159	1.78143	0.865388	1.09957	0.761584	0.311531	0.410024	0.574852	0.118747	0.206051	0.743439	0.0956	0.258046	28	15	9	11	4	4	4	1	2	4	1	3	29.4853	11.2113	12.0925	9.49217	3.01797	3.85056	5.40252	0.964582	1.89926	6.77987	0.983201	2.19539
12	113561066	113561597	-1	ENSMUSG00000095612	Ighv5-4	1230.43	3.17711	1.05427	2.06504	0.0389191	0.836893	IG V gene	immunoglobulin heavy variable 5-4	344.481	3390.21	201.626	486.345	61.5318	66.0947	36.8705	53.4678	69.2441	1008.08	48.4478	55.923	1208	10293	495	1213	138	116	65	85	126	1791	97	124	1190.65	9171.39	463.506	1265.82	124.479	129.618	72.3607	90.6965	133.45	1920.06	104.05	99.0899
7	44732337	44741645	-1	ENSMUSG00000019539	Rcn3	80.8898	1.87862	0.425342	2.06568	0.038859	0.836893	protein coding	reticulocalbin 3, EF-hand calcium binding domain	16.5144	20.2364	10.1339	10.6205	5.33682	4.40103	2.27912	2.9545	2.94639	9.75067	9.2137	9.61629	275	307	142	150	54	26	22	13	30	72	34	29	219.197	210.24	89.3734	106.152	41.4604	33.1442	17.1769	19.2458	21.779	71.3097	75.9899	65.6083
1	164264678	164285924	-1	ENSMUSG00000026576	Atp1b1	158.95	1.59407	0.287976	2.06293	0.0391194	0.83978	protein coding	ATPase, Na+/K+ transporting, beta 1 polypeptide	9.00521	7.84733	24.7814	18.6901	6.71452	4.04415	4.22679	12.3586	7.9526	7.04	6.02438	7.07895	214	253	313	363	120	49	77	83	90	88	97	137	225.808	154.02	412.885	352.914	98.5459	57.5376	60.1812	152.088	111.053	97.2655	93.8657	91.2414
13	54519162	54531730	1	ENSMUSG00000025867	Cplx2	26.6041	1.94588	0.459106	2.06026	0.0393735	0.842395	protein coding	complexin 2	0.792556	0.919346	1.10735	0.839409	0.252277	0.556424	0.303837	0.179262	0.180982	0.830635	0.120534	0.28188	60	59	59	45	12	20	11	6	7	31	5	13	57.7396	52.4243	53.603	46.05	10.7572	23.0001	12.5687	6.40933	7.3427	33.3423	5.45635	10.5557
1	30979383	30988390	-1	ENSMUSG00000026064	Ptp4a1	198.002	-1.52906	0.256708	-2.06093	0.0393096	0.842395	protein coding	protein tyrosine phosphatase 4a1	2.34465	2.09557	6.21845	6.62514	18.4223	11.1099	19.8523	19.1807	18.291	16.2532	13.5474	18.8036	90	65	81	170	256	173	217	214	262	234	205	301	62.9957	44.3362	111.337	134.284	291.028	170.136	303.56	254.511	275.377	241.4	226.655	260.4
11	101061349	101081550	1	ENSMUSG00000017167	Cntnap1	6.57659	2.93064	0.940175	2.05349	0.0400252	0.8549	protein coding	contactin associated protein-like 1	0.357448	0.295193	0.203145	0.067304	0	0	0	0.026954	0.046646	0.145037	0.086998	0.058688	30	21	12	4	0	0	0	1	2	6	4	3	28.8586	18.6543	10.8975	4.09182	0	0	0	1.06797	2.09725	6.45182	4.36439	2.43551
5	111306177	111308554	1	ENSMUSG00000106153	Gm43677	12.3148	-2.12276	0.548308	-2.04768	0.0405914	0.865543	TEC	predicted gene 43677	0.028781	0.169533	0.122755	0.284434	0.823637	0.966561	0.839845	1.10456	1.40709	0.699289	0.523791	0.801019	1	5	3	7	18	16	14	17	25	12	10	17	0.963827	4.44386	2.73146	7.17283	16.144	18.3656	15.9698	18.1536	26.2417	12.9031	10.8994	13.7885
12	115335606	115336053	-1	ENSMUSG00000102765	Ighv1-62	4.41393	2.58361	0.774867	2.04372	0.0409809	0.871194	IG V pseudogene	immunoglobulin heavy variable V1-62	4.94729	5.67126	3.53642	6.34756	1.27809	0.807583	0	2.72324	0.791868	1.60792	2.14233	0.641378	12	12	6	11	2	1	0	3	1	2	3	1	11.8895	10.6527	5.64192	11.4988	1.79887	1.10466	0	3.1977	1.05812	2.13454	3.19737	0.793043
2	25222350	25242224	1	ENSMUSG00000036646	Man1b1	693.09	1.5702	0.279017	2.0436	0.0409934	0.871194	protein coding	mannosidase, alpha, class 1B, member 1	45.0422	27.0898	24.8937	21.635	11.0969	8.99634	10.2779	16.89	19.2683	20.263	18.3034	15.0984	2453	1290	959	865	372	235	254	356	524	567	389	461	2259.03	1063.45	829.564	817.093	325.75	256.005	292.693	415.73	538.172	559.948	570.405	389.236
6	134586170	134609451	-1	ENSMUSG00000032718	Mansc1	7.55369	3.46713	1.20975	2.03937	0.0414133	0.878372	protein coding	MANSC domain containing 1	1.32514	0.271503	0.491476	0.569395	0	0	0	0	0.169007	0.058328	0.471846	0	46	8	12	14	0	0	0	0	3	1	9	0	44.2837	7.10176	10.913	14.3287	0	0	0	0	3.14529	1.07398	9.79785	0
13	112424985	112520536	1	ENSMUSG00000049985	Ankrd55	19.2262	2.43444	0.70357	2.03881	0.0414691	0.878372	protein coding	ankyrin repeat domain 55	1.63436	1.65629	2.22929	1.04061	0	0.1845	0.139816	0.104573	0.57124	1.12841	0.309436	0.989203	57	51	51	30	0	3	2	1	11	23	6	20	53.3217	42.2963	48.326	25.5656	0	3.41533	2.59011	1.67438	10.3789	20.2845	6.273	16.589
4	63132241	63253228	1	ENSMUSG00000045672	Col27a1	58.4826	-2.02528	0.503528	-2.03619	0.0417314	0.882459	protein coding	collagen, type XXVII, alpha 1	0.143079	0.116024	0.86214	0.499549	1.36089	2.19171	3.34366	1.59566	1.1938	1.15839	4.1203	1.52759	17	9	30	23	47	73	105	57	37	33	142	70	9.51478	6.03922	38.0944	25.0159	52.9695	82.6965	126.256	52.0767	44.211	42.4443	170.256	52.2167
6	69703557	69704122	-1	ENSMUSG00000076563	Igkv5-48	148.657	1.86689	0.426256	2.03374	0.0419777	0.886196	IG V gene	immunoglobulin kappa variable 5-48	100.718	69.5486	244.478	177.789	24.1551	39.0771	12.969	44.3889	61.2185	95.9306	87.6849	78.9303	259	156	440	326	40	51	17	52	82	126	130	130	257.059	138.939	414.596	341.698	36.084	56.5887	18.7948	55.6006	87.0133	134.904	139.06	103.55
17	81680534	82045806	-1	ENSMUSG00000054640	Slc8a1	9.04267	2.98877	0.980333	2.02867	0.0424919	0.895566	protein coding	solute carrier family 8 (sodium/calcium exchanger), member 1	0.416402	0.024166	0.647766	0.195476	0	0.129616	0.107224	0.077935	0.067536	0.006928	0.012474	0.056502	14	6	17	6	0	18	15	1	1	1	2	1	35.7525	1.62408	36.9548	12.6386	0	6.31438	5.22745	3.284	3.22927	0.327758	0.665488	2.49365
2	98492582	98494428	1	ENSMUSG00000075015	Gm10801	1577.74	-3.53613	1.25167	-2.0262	0.0427442	0.899396	protein coding	predicted gene 10801	3.17055	0.740277	11.1215	210.495	45.4002	2021.35	2240.87	1200.09	56.3328	423.885	867.042	189.188	15	3	37	703	136	4704	5239	2548	137	1004	2308	559	14.7052	2.67229	34.4408	730.619	122.561	5289.36	5867.88	2715.93	144.769	1077.22	2484.51	448.158
X	135145828	135147888	1	ENSMUSG00000042712	Tceal9	229.412	1.54808	0.271435	2.0192	0.0434663	0.911576	protein coding	transcription elongation factor A like 9	39.8214	48.0871	36.9426	38.119	13.8632	21.223	14.6981	19.2864	30.6505	28.8346	8.38135	25.7703	514	529	335	349	113	132	92	111	203	185	60	205	498.098	470.8	307.032	359.047	101.494	150.621	104.391	118.394	213.507	198.725	65.142	165.69
15	80524659	80526609	1	ENSMUSG00000116433	Gm49553	106.765	-1.43941	0.217575	-2.01957	0.0434278	0.911576	TEC	predicted gene, 49553	1.54195	2.40658	3.51873	2.17674	7.86382	10.3708	9.55312	13.8312	8.0613	6.67422	6.38758	10.496	43	57	69	43	138	138	128	171	115	92	98	179	41.4739	50.6657	62.8851	44.0881	123.798	158.269	145.899	182.576	120.749	98.9111	106.755	145.113
7	83234135	83274822	1	ENSMUSG00000038540	Tmc3	55.694	2.3239	0.65704	2.01495	0.0439096	0.919358	protein coding	transmembrane channel-like gene family 3	1.09291	3.17694	4.20268	2.65116	0.141321	0.767469	0.238405	0.07036	0.950803	2.67244	0.550661	0.615969	82	159	120	132	5	11	6	3	28	85	15	35	62.3371	141.835	159.275	113.871	4.71792	24.8373	7.72119	1.96955	30.2016	83.9872	19.5163	18.0593
4	102895262	102971752	-1	ENSMUSG00000035126	Dnai4	37.0639	-1.76458	0.38106	-2.00646	0.0448072	0.935074	protein coding	dynein axonemal intermediate chain 4	0.1788	0.35288	0.604212	0.304377	2.488	1.49056	1.80749	0.902827	2.06323	1.0186	1.84183	1.68212	11	18	27	14	46	46	21	29	52	34	53	68	9.27249	14.3241	20.8198	11.8865	75.5192	43.859	53.2242	22.9781	59.5873	29.1056	59.3511	44.8399
16	17653141	17709535	-1	ENSMUSG00000092470	Gm20518	21.704	-2.30851	0.65211	-2.00659	0.0447936	0.935074	protein coding	predicted gene 20518	0	0.156707	0.392648	0.037863	1.6702	0.912193	1.2723	1.22609	0.562365	0.295044	0.665389	1.07909	0	8	16	2	61	25	35	31	17	8	21	38	0	7.10998	14.547	2.04771	54.6984	28.7404	39.9799	33.1172	17.8383	8.60518	22.9129	30.851
4	134238310	134251238	1	ENSMUSG00000078521	Aunip	6.58867	2.78511	0.890999	2.00349	0.0451243	0.935558	protein coding	aurora kinase A and ninein interacting protein	1.05705	1.3112	0.417935	1.82318	0	0.122455	0.608245	0	0.114648	0.236971	0.106308	0.765239	18	19	5	22	0	1	5	0	1	2	1	8	17.4018	16.8957	4.57159	22.6018	0	1.14381	5.6857	0	1.0511	2.14949	1.08747	6.47553
12	115109107	115109539	-1	ENSMUSG00000095204	Ighv1-52	143.569	1.93205	0.465201	2.00354	0.045119	0.935558	IG V gene	immunoglobulin heavy variable 1-52	134.701	120.83	177.786	155.907	35.9429	18.3507	26.5219	31.208	22.6214	159.531	55.0313	90.6356	330	258	305	272	57	23	33	35	29	200	78	142	327.972	229.785	287.706	285.239	51.4361	25.4929	36.4356	37.4259	30.7862	214.153	83.4043	112.987
11	94520593	94536042	1	ENSMUSG00000020869	Lrrc59	701.7	1.37516	0.187074	2.00541	0.0449189	0.935558	protein coding	leucine rich repeat containing 59	44.1616	35.6011	36.4884	34.7822	16.4341	18.492	19.7614	21.3335	26.3782	29.9653	15.7859	22.5659	1860	1268	1065	1028	413	328	327	368	559	614	365	569	1714.63	1081.93	941.322	1016.94	373.464	407.369	435.659	406.506	570.356	641.038	380.841	450.356
2	70383416	70432358	1	ENSMUSG00000070880	Gad1	63.0781	-2.20388	0.600877	-2.00354	0.0451197	0.935558	protein coding	glutamate decarboxylase 1	0.246523	1.95952	0.831782	0.8728	6.15586	6.15644	8.33854	5.38085	2.97581	1.2406	14.5313	1.60022	9	17	27	32	111	44	59	111	59	17	82	40	6.29259	39.1498	14.1071	16.7764	91.9682	89.1621	120.855	67.4065	42.3011	17.4479	230.475	20.9957
9	54452078	54467502	-1	ENSMUSG00000037493	Cib2	19.0965	1.90911	0.454799	1.99894	0.0456154	0.939618	protein coding	calcium and integrin binding family member 2	3.47534	1.92312	2.83624	1.3705	0.892454	0.640497	1.69659	1.15066	0.898387	1.23852	0.463224	0.666843	68	32	39	19	11	6	16	10	9	12	5	8	65.6863	28.4508	35.6187	19.506	9.87282	6.86869	18.2078	10.6734	9.45619	12.8979	5.44023	6.47857
4	46489248	46503632	1	ENSMUSG00000028334	Nans	412.59	1.48861	0.244334	1.99978	0.0455235	0.939618	protein coding	N-acetylneuraminic acid synthase (sialic acid synthase)	38.9864	27.6673	28.6252	29.1258	13.8097	18.0721	11.255	11.6656	24.4703	21.7868	12.1069	17.1671	1095	743	637	657	276	211	172	165	321	341	159	333	1109.17	616.117	541.12	623.987	229.958	291.725	181.818	162.881	387.704	341.524	214.026	251.051
19	11415395	11416196	1	ENSMUSG00000100615	Gm5511	112.999	-1.4709	0.2355	-1.99958	0.0455452	0.939618	processed pseudogene	predicted gene 5511	4.24791	6.48868	9.08652	9.70303	26.9912	30.2072	35.9006	41.6366	23.4861	17.7306	23.1161	28.1364	40	52	60	65	161	138	165	176	114	83	121	164	38.8496	46.27	55.2096	67.0391	144.754	156.956	186.685	187.634	120.058	89.127	131.101	132.306
5	146125430	146131619	-1	ENSMUSG00000106547	B230303O12Rik	34.4905	-1.7931	0.396654	-1.99947	0.0455571	0.939618	lncRNA	RIKEN cDNA B230303O12 gene	0.1089	0.235417	0.490082	0.486946	1.29946	1.03101	2.35067	2.46165	1.66922	1.28784	0.794265	1.54795	6	11	19	19	45	27	62	60	47	35	24	52	5.77682	9.77481	17.2738	19.4515	40.346	31.0316	70.8041	64.0864	49.3116	37.6412	26.1803	42.208
12	114226272	114226707	-1	ENSMUSG00000076670	Ighv3-5	827.636	3.99549	1.50037	1.9965	0.0458797	0.940577	IG V gene	immunoglobulin heavy variable 3-5	151.955	2901.34	172.042	1603.94	0	4.39124	3.95577	2.6587	433.985	304.119	27.9998	71.7961	376	6003	298	2832	0	4	5	3	523	370	40	114	358.076	5351.42	269.373	2846.18	0	5.87121	5.29294	3.07474	569.521	394.862	40.9982	86.9641
17	56259640	56264022	1	ENSMUSG00000003206	Ebi3	70.406	1.58054	0.290717	1.99693	0.0458324	0.940577	protein coding	Epstein-Barr virus induced gene 3	11.9324	10.1986	11.9868	9.07324	4.83583	1.79404	6.0328	4.76721	7.11506	5.34529	5.6327	6.14694	180	131	127	97	46	13	44	32	55	40	47	57	174.138	116.498	116.232	99.7107	41.3063	14.8552	49.9909	34.1437	57.8257	42.9813	51.0779	46.1109
19	59884673	59889494	-1	ENSMUSG00000090965	Gm17203	14.8526	-2.07826	0.540085	-1.99646	0.0458836	0.940577	lncRNA	predicted gene 17203	0.081871	0.096553	0.139611	0.092487	0.39082	0.861578	0.376389	1.11064	0.320437	0.365225	0.866111	0.617869	5	5	6	4	15	25	11	30	10	11	29	23	4.81316	4.44297	5.45354	4.09444	13.4479	28.7391	12.5644	32.0445	10.491	11.8305	31.639	18.6713
2	69500464	69514574	1	ENSMUSG00000075307	Klhl41	6.82067	2.94431	0.975458	1.99323	0.0462363	0.946283	protein coding	kelch-like 41	0.9416	0.38039	0.344212	0.455798	0.042777	0.169475	0	0.060748	0.420932	0.163451	0	0	35	12	9	12	1	3	0	1	8	3	0	0	33.7018	10.6568	8.18598	12.2849	0.896146	3.44169	0	1.06709	8.39025	3.22341	0	0
2	69024239	69036538	-1	ENSMUSG00000005233	Spc25	57.0381	1.63617	0.319648	1.99022	0.0465664	0.951508	protein coding	SPC25, NDC80 kinetochore complex component, homolog (S. cerevisiae)	7.40055	10.4975	11.3583	11.3471	3.23309	4.304	3.54824	2.23033	7.08829	6.37268	2.7916	7.23214	65	100	82	113	41	32	14	15	48	48	30	83	97.2922	108.022	99.2171	112.334	24.8777	32.1045	26.4869	14.3901	51.8956	46.1612	22.8043	48.8719
15	74668723	74671835	-1	ENSMUSG00000044678	Ly6k	62.9015	1.86916	0.43885	1.98055	0.0476421	0.971929	protein coding	lymphocyte antigen 6 complex, locus K	21.7004	19.9755	10.1672	14.0155	9.07893	3.34315	1.55084	5.79769	7.57166	12.787	4.84715	8.99041	200	158	66	92	52	15	7	24	36	59	25	49	193.896	139.705	60.3619	94.3027	47.4805	16.9488	7.86819	25.4236	37.6763	62.9525	26.9115	41.2915
10	83323314	83370004	-1	ENSMUSG00000020256	Aldh1l2	16.079	2.69734	0.8614	1.97045	0.048787	0.991019	protein coding	aldehyde dehydrogenase 1 family, member L2	1.35432	0.908331	0.532642	1.01063	0.030104	0.603072	0.118563	0.042769	0.16775	1.068	0	0.093092	99	26	35	19	1	11	3	1	8	6	0	3	59.9607	31.4774	15.6689	33.6938	0.780093	15.1493	2.98057	0.929298	4.13603	26.0529	0	2.11854
7	24994474	24997411	-1	ENSMUSG00000005447	Pafah1b3	177.452	1.62348	0.316268	1.97138	0.0486809	0.991019	protein coding	platelet-activating factor acetylhydrolase, isoform 1b, subunit 3	51.4485	40.0974	31.2561	31.8171	12.0572	10.1226	15.7918	13.337	23.2684	30.8378	24.1129	18.8116	502	337	198	228	88	54	86	69	123	171	129	120	520.515	317.531	210.113	242.4	71.3981	58.1075	90.7189	66.2214	131.1	171.903	151.586	97.8282
14	73360477	73445283	1	ENSMUSG00000022106	Rcbtb2	200.388	1.52655	0.267254	1.97024	0.0488114	0.991019	protein coding	regulator of chromosome condensation (RCC1) and BTB (POZ) domain containing protein 2	26.6548	13.6224	21.9155	22.4894	6.11229	11.2993	7.13775	11.2716	13.197	10.3958	9.88689	17.4705	531	317	302	306	113	114	66	101	159	157	85	175	549.759	219.917	300.336	349.291	73.7868	132.229	83.5917	114.094	151.581	118.139	126.708	185.217
16	22676595	22698384	1	ENSMUSG00000004460	Dnajb11	1247.04	1.39534	0.20099	1.96694	0.0491899	0.997113	protein coding	DnaJ heat shock protein family (Hsp40) member B11	123.446	98.0971	90.7529	85.0598	51.6742	40.9315	41.9407	54.8114	73.9959	67.8611	45.5287	69.3478	3359	2301	1727	1662	889	535	556	651	1042	922	644	1130	3233.5	2011.23	1579.48	1677.77	792.224	608.323	623.788	704.607	1079.39	979.396	741.021	933.699
1	86753823	86757377	1	ENSMUSG00000102383	Gm38142	37.853	-1.7124	0.362429	-1.96563	0.049341	0.998586	TEC	predicted gene, 38142	0.20503	0.285705	0.423829	0.605339	1.39373	2.35262	1.94659	1.60096	1.75062	0.982401	2.24289	1.31441	11	13	16	23	47	60	50	38	48	26	66	43	10.5913	11.5521	14.5473	23.5476	42.1398	68.9551	57.0971	40.5876	50.3619	27.9618	71.9932	34.9016
11	54793279	54801203	1	ENSMUSG00000018339	Gpx3	40.3154	3.90463	1.66552	1.74398	0.0811618	1	protein coding	glutathione peroxidase 3	5.01073	8.58786	5.27841	9.17519	0	0	0	0	1.05837	2.85442	0	1.54768	111	129	63	144	0	0	0	0	12	25	0	21	96.5524	129.526	67.5809	133.134	0	0	0	0	11.3573	30.3054	0	15.3293
12	113248945	113252552	-1	ENSMUSG00000076612	Ighg2c	23193.5	3.41797	1.43431	1.68581	0.0918331	1	IG C gene	immunoglobulin heavy constant gamma 2C	8491	5044.48	3816.41	2356.91	28.3627	39.6003	1.00516	0.46819	2300.93	1480.43	847.843	915.177	122248	61879	38603	24069	262	284	7	3	16983	10586	6755	8107	118850	55266.8	35493.7	24842.5	232.361	314.497	7.98874	3.21618	17935.2	11417.4	7374.24	6584.7
7	19450569	19484408	-1	ENSMUSG00000062300	Nectin2	6.03237	3.38265	1.26841	1.87844	0.0603205	1	protein coding	nectin cell adhesion molecule 2	0.536654	0.627856	1.7971	0.03488	0	0.155697	0	0	0.209812	0.372639	0	0	15	20	10	1	0	3	0	0	3	7	0	0	14.6102	13.3792	32.5081	0.715063	0	2.40504	0	0	3.18103	5.58972	0	0
12	114687392	114687825	-1	ENSMUSG00000095761	Ighv1-20	150.259	3.17704	1.19734	1.81823	0.0690294	1	IG V gene	immunoglobulin heavy variable V1-20	384.142	149.068	127.808	30.0426	6.33969	2.40983	7.19621	8.95935	58.7893	128.633	0	33.7359	940	319	219	52	10	3	9	10	75	161	0	53	932.408	283.562	206.181	54.425	9.00635	3.3187	9.91768	10.6723	79.4648	172.058	0	42.0895
12	113319844	113324852	-1	ENSMUSG00000076615	Ighg3	9997.7	3.13832	1.17871	1.81412	0.0696589	1	IG C gene	Immunoglobulin heavy constant gamma 3	1923.66	2447.53	1652.22	1365.31	32.0131	16.562	6.64478	2.62047	805.81	791.616	296.073	492.092	27491	29840	16548	13780	379	161	75	41	5893	5709	2388	4310	31526.6	31396.9	17991.8	16849.7	307.083	154.008	61.835	21.077	7354.56	7148.33	3015.07	4145.47
19	25649775	25656355	1	ENSMUSG00000048138	Dmrt2	8.41683	3.08778	1.29465	1.61263	0.106825	1	protein coding	doublesex and mab-3 related transcription factor 2	1.14414	0.622081	0.08342	1.07687	0.699598	0.184709	0	0	0	0.118792	0	0	39	18	2	26	15	3	0	0	0	2	0	0	37.5545	15.9823	1.81933	26.6171	13.4404	3.43995	0	0	0	2.14839	0	0
6	31197286	31314339	1	ENSMUSG00000087380	2210408F21Rik	4.31842	3.06781	1.29061	1.6022	0.109112	1	lncRNA	RIKEN cDNA 2210408F21 gene	1.68047	2.2159	0.096548	1.97258	0	0.743725	0	0	0.979223	0	0	0.345807	11	10	1	7	0	5	0	0	4	0	0	3	14.2537	14.7116	0.544129	12.5993	0	3.57924	0	0	4.62548	0	0	1.50768
1	171265103	171292171	1	ENSMUSG00000038235	F11r	6.76235	3.02721	1.06851	1.89723	0.0577977	1	protein coding	F11 receptor	0.675784	0.732554	0.576429	0.496139	0.042981	0.05676	1.13907	0	0	0.383202	0	0.044268	25	23	15	13	1	1	2	0	0	7	0	1	18.6284	15.8059	10.5578	10.2987	0.693466	0.887746	17.8288	0	0	5.82018	0	0.62724
11	67345917	67575800	1	ENSMUSG00000033066	Gas7	118.49	3.02065	1.08168	1.86807	0.0617522	1	protein coding	growth arrest specific 7	9.34116	6.79389	7.35947	4.21355	0.115716	0.261605	0.019015	0.099386	2.9656	2.39924	3.5504	0.444968	314	258	178	132	8	10	1	3	66	62	35	17	467.58	266.185	244.772	158.824	3.39021	7.42987	0.540461	2.4415	82.6692	66.1715	110.429	11.4489
6	70192384	70192941	1	ENSMUSG00000094930	Igkv6-25	1243.23	2.99246	1.20183	1.65786	0.0973454	1	IG V gene	immunoglobulin kappa chain variable 6-25	3556.58	619.729	75.8317	171.087	39.9539	35.2944	36.6493	38.5242	228.125	1313.58	136.147	82.4935	10148	1538	151	348	73	51	53	50	338	1909	223	150	10046.3	1369.89	141.938	364.284	65.8686	56.7364	58.7519	53.4054	358.357	2044.83	238.747	119.635
12	113288860	113294143	-1	ENSMUSG00000076614	Ighg1	2943.22	2.96694	1.35426	1.45241	0.146387	1	IG C gene	immunoglobulin heavy constant gamma 1 (G1m marker)	474.646	562.793	236.229	619.483	5.67612	1.78733	0.687033	1.15149	287.442	499.288	6.39891	162.885	6664	6978	2371	6144	130	31	12	9	2187	3570	70	1439	8675.88	8051.97	2869.03	8526.79	60.7258	18.5365	7.1306	10.3296	2925.97	5028.47	72.6773	1530.4
9	71123071	71203525	1	ENSMUSG00000013584	Aldh1a2	15.5435	2.91007	1.1831	1.61447	0.106426	1	protein coding	aldehyde dehydrogenase family 1, subfamily A2	1.91406	1.46731	0.388778	1.75861	0	0	0	0.137151	1.06937	0.984071	0.055277	0	63	41	9	41	0	0	0	2	18	16	1	0	60.6695	36.4038	8.18793	41.9756	0	0	0	2.13349	18.8763	17.1863	1.0887	0
6	72332430	72336745	1	ENSMUSG00000055912	Tmem150a	11.6525	2.82103	0.9352	1.94721	0.0515093	1	protein coding	transmembrane protein 150A	2.57232	2.20064	1.19218	0.924175	0.313006	0	0.102297	0.110991	0.192549	2.23432	0	0.402053	55	40	17	14	4	0	1	1	2	10	0	5	47.1808	31.5936	14.5292	12.7646	3.36024	0	1.06539	0.999099	1.96678	22.5801	0	3.79054
15	83110923	83135975	-1	ENSMUSG00000047878	A4galt	12.9211	2.80596	0.993156	1.81841	0.0690016	1	protein coding	alpha 1,4-galactosyltransferase	1.41562	1.2108	0.95624	1.84853	0	0	0	0	0.622653	0.930817	0.450328	0.231499	40	31	19	37	0	0	0	0	9	13	7	4	38.8546	26.0124	17.439	38.2063	0	0	0	0	9.51738	14.0767	7.68023	3.26606
7	126222421	126230033	-1	ENSMUSG00000030717	Nupr1	5.26986	2.80355	0.986749	1.82777	0.0675843	1	protein coding	nuclear protein transcription regulator 1	0.697568	0.949445	1.30052	1.57235	0	1.06779	0.464748	0.125832	0.197398	0.112856	0	0	4	8	9	11	0	5	8	2	1	2	0	0	9.60549	10.2332	11.8989	16.304	0	8.34253	3.63376	0.850363	1.51374	0.85625	0	0
17	48726259	48739958	-1	ENSMUSG00000040694	Apobec2	10.9781	2.80076	1.01618	1.77209	0.076379	1	protein coding	apolipoprotein B mRNA editing enzyme, catalytic polypeptide 2	3.43758	1.51858	0.955632	1.38527	0.820043	0	0	0	0	1.04316	0.842714	0.336987	23	25	13	19	10	0	0	0	0	10	9	4	56.2143	19.4375	10.3835	17.0584	7.84888	0	0	0	0	9.39909	8.56294	2.83259
12	114330141	114330574	-1	ENSMUSG00000076676	Ighv12-3	46.8935	2.79143	1.10396	1.62273	0.104648	1	IG V gene	immunoglobulin heavy variable V12-3	16.1654	85.6285	65.2376	68.53	1.88119	3.17911	0	1.77247	6.97823	65.6043	3.49997	10.7064	40	185	113	121	3	4	0	2	9	83	5	17	39.6149	164.248	106.225	126.463	2.69824	4.42036	0	2.13171	9.52338	88.5819	5.32949	13.4864
7	120663290	120673795	-1	ENSMUSG00000035004	Igsf6	6.89261	2.77138	1.15725	1.53067	0.12585	1	protein coding	immunoglobulin superfamily, member 6	0.381138	0.374087	1.53548	0.538076	0	0.732849	0.066161	0.071677	0.248408	0	0	0	12	10	34	12	0	11	1	1	4	0	0	0	11.5632	8.8834	30.9528	12.2928	0	12.6151	1.13973	1.06722	4.19699	0	0	0
4	108736260	108800521	1	ENSMUSG00000003411	Rab3b	7.77717	2.75299	0.912205	1.92171	0.0546424	1	protein coding	RAB3B, member RAS oncogene family	1.71641	1.22852	1.48745	0.733584	0.599923	0.280575	0	0	0.144888	0.162185	0	1.30865	26	17	19	7	6	4	0	0	1	4	0	6	28.7494	16.1064	16.5542	9.25275	5.88141	2.66647	0	0	1.35151	1.49679	0	11.267
6	69161810	69162381	-1	ENSMUSG00000076543	Igkv4-74	131.868	2.71819	0.940759	1.82639	0.0677914	1	IG V gene	immunoglobulin kappa variable 4-74	267.592	25.6359	91.28	71.3106	11.2331	4.55402	17.4898	5.04515	133.781	21.3638	13.1367	12.3428	817	68	195	155	22	7	27	7	212	33	23	24	807.748	60.5614	183.079	162.095	19.8463	7.7997	29.9772	7.47405	224.692	35.3563	24.6398	19.151
9	21678080	21710040	-1	ENSMUSG00000032194	Kank2	10.0367	2.7031	0.997045	1.70815	0.087609	1	protein coding	KN motif and ankyrin repeat domains 2	0.696743	0.289196	0.164996	0.350867	0	0.108709	0	0.058369	0.126275	0.052347	0.361162	0	54	19	9	16	0	4	0	2	5	2	11	0	49.0494	15.9354	7.71777	18.6001	0	4.34217	0	2.01663	4.95054	2.03047	15.7984	0
11	102139708	102156013	1	ENSMUSG00000034773	Hrob	11.1352	2.69158	0.890211	1.9002	0.0574071	1	protein coding	homologous recombination factor with OB-fold	0.347038	2.04458	2.05127	1.64301	0.084895	0	0	0.054127	0.359336	0.858163	0.46718	0.745977	13	65	18	18	2	0	0	1	2	13	2	19	7.76684	35.8163	30.5035	27.6898	1.11207	0	0	0.594516	4.47861	10.5823	6.49681	8.58166
11	62415772	62430087	-1	ENSMUSG00000018509	Cenpv	14.5244	2.69143	1.02871	1.64422	0.100132	1	protein coding	centromere protein V	4.52256	5.78807	1.73627	4.80392	0	1.56028	0	0	2.90356	1.22724	0	2.19296	44	61	16	39	0	4	0	0	19	8	0	8	43.4778	43.5539	11.0907	34.777	0	8.5107	0	0	15.545	6.50063	0	10.8366
15	101905133	101912917	-1	ENSMUSG00000049382	Krt8	3.7057	2.68059	1.2363	1.35937	0.174029	1	protein coding	keratin 8	0.428584	0	0.609492	0.554604	0	0.074851	0.148672	0.402805	0	0	0.064919	0.058403	12	0	12	11	0	1	2	5	0	0	1	1	11.5778	0	10.94	11.282	0	1.14727	2.28047	5.34027	0	0	1.08971	0.810962
12	115471165	115471651	-1	ENSMUSG00000094088	Ighv1-64	2065.46	2.68031	1.10722	1.51759	0.129118	1	IG V gene	immunoglobulin heavy variable 1-64	3040.76	543.339	347.212	2998.41	70.2186	45.8513	71.5711	76.7951	2456.61	272.644	108.8	245.982	9768	1515	780	6856	145	74	116	112	4096	445	200	502	9647.03	1349.31	731.692	7163.1	130.803	82.5322	128.924	119.565	4340.55	476.846	214.402	400.722
10	126866873	126877382	-1	ENSMUSG00000080115	Eef1akmt3	15.8509	2.66089	1.03782	1.60037	0.109517	1	protein coding	EEF1A lysine methyltransferase 3	1.51656	1.08406	1.13091	0.793483	0	0.731204	0	0	0.534929	0.604343	0.24003	0	61	37	32	23	0	14	0	0	11	12	5	0	58.7399	32.8654	29.1047	23.5478	0	16.0691	0	0	11.5384	12.8973	5.44855	0
12	114859858	114860291	-1	ENSMUSG00000095923	Ighv1-37	6.56639	2.63301	0.905653	1.80313	0.0713672	1	IG V gene	immunoglobulin heavy variable 1-37	1.67213	10.9501	9.37928	11.1898	1.93334	0	4.06275	0	0	1.62136	1.43867	5.17576	4	23	16	20	3	0	5	0	0	2	2	8	3.99537	20.2419	14.9139	20.7249	2.71929	0	5.54365	0	0	2.11615	2.14823	6.39324
10	43700196	43709388	1	ENSMUSG00000111342	4933404K13Rik	11.9328	2.61223	1.02313	1.57578	0.115076	1	lncRNA	RIKEN cDNA 4933404K13 gene	4.41029	2.19247	2.27875	3.63341	0	0.306212	0	0.165397	0.78236	3.68304	0	1.39687	42	18	16	24	0	2	0	1	4	17	0	11	45.7146	17.7882	15.6943	28.3606	0	1.8009	0	0.841386	4.51617	21.0347	0	7.44255
10	108167982	108250101	1	ENSMUSG00000035873	Pawr	34.2731	2.60838	0.832001	1.93315	0.0532176	1	protein coding	PRKC, apoptosis, WT1, regulator	6.14374	4.597	3.35659	3.10136	0.323174	0	0.676777	0	2.1714	3.86649	0.704297	0.664765	151	96	58	54	5	0	8	0	21	47	5	10	132.988	77.8871	48.2768	50.5529	4.09445	0	8.31824	0	26.1755	46.1147	9.47298	7.39651
4	125918343	125938233	1	ENSMUSG00000028859	Csf3r	4.96459	2.60443	1.13536	1.41314	0.157613	1	protein coding	colony stimulating factor 3 receptor (granulocyte)	0.262929	0.523312	0.240359	0.358174	0	0.234302	0	0.047766	0.041357	0	0.30819	0	5	21	8	12	0	5	0	1	1	0	8	0	10.6847	16.6454	6.48998	10.9605	0	5.12382	0	0.952634	0.935939	0	7.78201	0
3	59123693	59170292	-1	ENSMUSG00000036353	P2ry12	4.45754	2.587	0.893093	1.77697	0.0755739	1	protein coding	purinergic receptor P2Y, G-protein coupled 12	0.429098	0.50534	0.328548	0.54306	0.493276	0.207652	0.063738	0	0.129068	0	0.060026	0.054	13	13	7	12	3	3	1	0	2	0	1	1	11.2982	10.4146	5.74788	10.7674	7.60184	3.10218	0.952916	0	1.89254	0	0.982067	0.730837
16	36613246	36695365	-1	ENSMUSG00000022838	Eaf2	214.093	2.55987	0.866682	1.79981	0.0718901	1	protein coding	ELL associated factor 2	53.4053	34.0158	29.7186	43.1692	1.19577	1.43752	1.9213	1.6136	20.2	30.3814	10.7087	13.4276	699	388	284	383	11	15	19	15	145	209	67	119	774.169	385.96	286.245	471.235	10.1456	11.8234	15.8143	11.4796	163.071	242.661	96.4573	100.052
9	21880007	21900742	-1	ENSMUSG00000040146	Rgl3	7.30508	2.55798	0.905603	1.72038	0.0853637	1	protein coding	ral guanine nucleotide dissociation stimulator-like 3	0.454598	0.534342	0.341493	0.755098	0	0.056154	0	0.094762	0	0.280497	0.336283	0.218973	17	17	9	20	0	1	0	2	0	7	9	5	17.9282	16.4945	8.94847	22.4246	0	1.25652	0	1.83411	0	6.09506	8.24068	4.43892
9	57905324	57914734	1	ENSMUSG00000097604	Gm17322	7.74588	2.55237	0.98612	1.57422	0.115437	1	lncRNA	predicted gene, 17322	0.92391	0.487802	0.0453	1.25936	0	0.334129	0.26545	0.431377	0.311462	0.064483	0	0.057728	29	13	1	28	0	5	4	6	5	1	0	1	27.9555	11.5529	0.910741	28.6946	0	5.73629	4.56064	6.4058	5.24828	1.07504	0	0.810794
11	83938867	83960087	-1	ENSMUSG00000018648	Dusp14	9.91886	2.524	0.943085	1.61598	0.106099	1	protein coding	dual specificity phosphatase 14	3.38533	0.653594	1.42368	1.99947	0	0.149282	0.513523	0.161237	2.09312	0.503166	0	0.659331	67	11	17	26	0	1	2	1	13	2	0	8	46.9316	7.09224	13.114	20.8734	0	1.17423	4.04232	1.09701	16.1598	3.84341	0	4.69837
11	32233511	32234465	1	ENSMUSG00000069919	Hba-a1	8.1577	2.50174	1.027	1.46226	0.143669	1	protein coding	hemoglobin alpha, adult chain 1	2.78936	8.50464	2.93784	0.61774	0.345042	0.887458	0	0.973263	0.490322	4.32378	0.485033	0	22	57	16	3	1	2	0	2	1	17	2	0	17.2979	40.9828	11.9267	2.50414	1.23592	3.08152	0	2.92313	1.44922	14.7432	1.7479	0
12	114792884	114793317	-1	ENSMUSG00000096649	Ighv1-31	13.451	2.50039	0.840515	1.78509	0.074247	1	IG V gene	immunoglobulin heavy variable 1-31	8.08308	24.6759	38.5433	9.01532	3.61361	6.81724	1.59916	1.28256	3.37882	20.6694	0	1.27657	17	44	66	13	4	6	2	1	3	20	0	2	16.0667	38.3441	50.8991	13.4888	4.20517	7.69045	1.80534	1.25147	3.71691	22.643	0	1.30103
3	57564814	57600220	-1	ENSMUSG00000074591	Ankub1	11.3543	2.48676	0.772429	1.92479	0.054256	1	protein coding	ankrin repeat and ubiquitin domain containing 1	1.19756	1.44094	0.736718	1.06852	0.341641	0	0.104681	0.998809	0.593901	0.230459	0	0.186253	33	36	14	24	6	0	2	12	8	3	0	3	33.147	31.2178	13.549	22.2712	5.53473	0	1.6452	13.5678	9.15456	3.51466	0	2.6499
3	96145424	96146443	-1	ENSMUSG00000081058	H3c15	508.962	2.47525	1.61293	0.914639	0.360381	1	protein coding	H3 clustered histone 15	77.7939	100.908	141.245	143.801	0	0.746058	0	0.19969	64.6314	92.8955	28.807	45.526	1006	1112	1282	1318	0	5	0	1	429	597	206	363	973.743	988.502	1174.41	1355.31	0	5.70278	0	1.06612	450.994	640.999	223.553	293.259
4	156331423	156340717	-1	ENSMUSG00000096351	Samd11	7.25714	2.47164	0.956885	1.53795	0.124061	1	protein coding	sterile alpha motif domain containing 11	0.428111	0.938032	1.05215	0.559815	0	0.178363	0.819959	0	0.10168	0.377658	0	0.092744	7	18	23	14	0	3	8	0	2	6	0	2	11.7902	20.2205	19.2531	11.6097	0	2.78707	12.8222	0	1.55946	5.73064	0	1.31289
13	22219334	22219738	-1	ENSMUSG00000069302	H2ac12	73.2372	2.46405	0.938626	1.55978	0.118811	1	protein coding	H2A clustered histone 12	36.4333	62.485	86.8829	81.0528	3.97091	1.31001	0	13.8589	57.3044	24.2595	17.6344	15.4095	117	174	195	185	8	2	0	20	96	40	32	31	115.246	154.561	182.44	192.776	7.19767	2.22471	0	21.2945	101.463	42.7493	34.2138	24.6804
19	10718311	10763407	1	ENSMUSG00000067577	A430093F15Rik	7.21882	2.46036	0.96598	1.5118	0.130586	1	lncRNA	RIKEN cDNA A430093F15 gene	1.2431	0.4868	1.29504	1.11598	0	0.068711	0.409415	0.073931	1.34128	0.34627	0	0.131177	18	11	18	16	0	1	6	1	8	2	0	1	23.2184	7.11684	16.072	15.6962	0	0.728172	4.34206	0.677695	13.9515	3.56355	0	1.2594
8	84116496	84155181	1	ENSMUSG00000002190	Clgn	9.90978	2.45487	0.842704	1.72643	0.0842704	1	protein coding	calmegin	0.838824	1.09399	0.306398	0.8036	0	0.323653	0.062427	0.190868	0.058582	0.849088	0.05451	0.147108	28	31	8	19	0	6	1	5	1	14	1	3	29.1112	29.7175	7.06536	21.0011	0	6.37307	1.23018	3.2509	1.13221	16.2362	1.17548	2.62425
15	38866680	38869580	-1	ENSMUSG00000097875	Gm26704	15.425	2.42159	0.783463	1.8145	0.0696012	1	lncRNA	predicted gene, 26704	0.903908	1.61175	0.2965	1.17809	0.516074	0.194833	0.09673	0.52359	0	0.516549	0	0.379808	39	59	9	36	14	4	2	10	0	11	0	10	37.5652	52.4286	8.18737	36.8683	12.5531	4.59413	2.28259	10.6791	0	11.8281	0	8.11342
3	90511078	90513352	1	ENSMUSG00000001020	S100a4	6.4675	2.41379	0.851788	1.65979	0.0969574	1	protein coding	S100 calcium binding protein A4	5.35833	3.77464	6.50674	3.66285	0	0.872726	1.74402	0.960436	5.26242	1.29165	0.769788	0	19	15	21	12	0	1	4	2	7	3	1	0	19.3676	10.6791	15.6268	9.96963	0	1.7898	3.57935	1.70371	10.5928	2.57237	1.7289	0
2	164611818	164620742	1	ENSMUSG00000001403	Ube2c	94.5418	2.40138	1.19699	1.17075	0.241699	1	protein coding	ubiquitin-conjugating enzyme E2C	14.4846	19.802	23.7017	24.1692	1.44222	0.594783	0	0	8.22978	15.4869	10.8914	6.17648	175	204	201	207	11	9	0	0	51	93	73	46	186.369	199.43	202.632	234.177	10.8612	4.34218	0	0	58.9703	109.793	87.0771	40.8498
12	113911902	113912416	-1	ENSMUSG00000076655	Ighv4-1	460.816	2.39789	0.836265	1.67158	0.0946068	1	IG V gene	immunoglobulin heavy variable 4-1	266.712	190.737	842.619	317.286	19.598	20.8166	17.8092	12.5215	182.77	174.453	208.105	183.15	892	553	1971	755	42	35	30	19	317	296	398	389	880.132	492.668	1847.48	788.397	37.8835	39.0721	33.3682	20.2776	335.862	317.219	426.729	310.694
11	32246489	32247298	1	ENSMUSG00000069917	Hba-a2	26.959	2.3977	1.7064	0.819091	0.412735	1	protein coding	hemoglobin alpha, adult chain 2	10.9957	35.5071	3.38029	4.00508	0.574062	0	0	0	3.83487	21.864	3.5241	0	60	167	13	16	2	0	0	0	11	60	11	0	58.2761	147.706	11.985	16.4842	1.78934	0	0	0	11.5337	63.9535	11.7798	0
19	21368671	21450809	-1	ENSMUSG00000058624	Gda	6.34216	2.39629	0.890385	1.56819	0.116838	1	protein coding	guanine deaminase	0.418761	0.623016	0.469833	0.196626	0	0.251599	0.058068	0.166262	0.023377	0.218055	0.202801	0	12	14	10	5	0	10	1	2	1	9	4	0	16.9238	19.7079	12.6164	5.9839	0	5.76926	1.33251	3.29765	0.526123	4.85557	5.09273	0
7	103461731	103463203	-1	ENSMUSG00000073940	Hbb-bt	14.011	2.39605	0.982714	1.42061	0.155432	1	protein coding	hemoglobin, beta adult t chain	2.79564	12.4063	3.22079	1.74311	1.00635	0	0	0.284362	0.324508	6.3807	1.41599	1.59582	22	83	18	10	5	0	0	1	1	25	6	8	21.3491	73.6602	16.5598	10.3024	4.48548	0	0	1.06275	1.051	26.7618	6.47288	6.42624
19	10222629	10282241	-1	ENSMUSG00000035735	Dagla	12.3234	2.39562	0.951585	1.46663	0.142477	1	protein coding	diacylglycerol lipase, alpha	0.254908	0.284636	0.244837	1.27301	0.018443	0.170888	0.121184	0.026212	0.067465	0.730162	0.042304	0	22	21	15	16	1	7	5	1	3	11	2	0	16.7196	14.6131	10.6704	62.8767	0.708024	6.35968	4.51331	0.84378	2.46434	26.3878	1.72413	0
1	170878743	170892504	-1	ENSMUSG00000059498	Fcgr3	4.70603	2.37785	1.0695	1.28831	0.19764	1	protein coding	Fc receptor, IgG, low affinity III	0.440635	0.946235	1.14532	1.21671	0	0.119887	0.238193	1.6278	0	0.370565	0.10414	0	8	14	14	15	0	1	2	6	0	1	1	0	6.01855	10.1273	10.4112	12.5347	0	0.930612	1.85034	10.9216	0	2.79333	0.884725	0
5	22089452	22549700	-1	ENSMUSG00000042453	Reln	179.412	2.36497	0.707395	1.92957	0.0536605	1	protein coding	reelin	11.8888	9.8113	6.82686	7.37941	0.588463	1.49343	0.400066	1.31236	6.20912	6.48691	1.11128	3.23081	1013	535	290	443	17	12	11	10	167	229	68	146	622.657	402.205	237.569	291.035	18.0388	44.3788	11.8973	33.7323	181.099	187.193	36.1646	86.9763
6	67931212	67931698	-1	ENSMUSG00000076512	Igkv9-123	30.9984	2.36218	1.28657	1.05877	0.289705	1	IG V gene	immunoglobulin kappa variable 9-123	9.96128	101.795	6.10141	3.49655	3.32301	6.33714	4.20667	3.12775	2.05207	48.1882	0.618968	0	28	249	12	7	6	9	6	4	3	69	1	0	27.6795	221.401	11.265	7.31637	5.40444	9.99117	6.63723	4.26535	3.17548	73.7774	1.06871	0
6	117988399	118068507	1	ENSMUSG00000030134	Rasgef1a	7.92182	2.34769	0.722754	1.86465	0.0622301	1	protein coding	RasGEF domain family, member 1A	0.466552	0.382633	0.730853	0.343708	0.161344	0	0.127065	0.229206	0.158751	0.384157	0	0.066515	23	16	22	12	5	0	3	5	4	6	0	2	20.8828	13.4054	21.7359	11.5849	4.22687	0	3.22938	5.03495	3.95715	9.47412	0	1.53034
9	70705410	70859508	-1	ENSMUSG00000032207	Lipc	80.4013	2.34404	0.969379	1.3865	0.165595	1	protein coding	lipase, hepatic	14.9722	8.43646	6.82164	4.43379	3.59948	0.172478	0	1.11441	6.11885	5.99725	1.19701	2.69226	365	174	117	79	55	2	0	12	76	72	16	40	351.999	155.248	106.562	78.4953	49.5307	2.30075	0	12.8582	80.1127	77.6871	17.4865	32.535
8	73325899	73341126	1	ENSMUSG00000031791	Tmem38a	7.74914	2.33904	0.756934	1.76903	0.0768881	1	protein coding	transmembrane protein 38A	1.36962	0.576079	0.834646	0.598479	0.414655	0.06839	0.191928	0.462822	0.617093	0.131995	0.237229	0	42	15	18	13	8	1	1	3	4	2	4	0	31.7829	10.4637	12.8693	10.4582	5.63197	0.900461	2.52895	5.27094	7.97481	1.68769	3.42068	0
9	44045766	44054024	1	ENSMUSG00000032135	Mcam	8.97593	2.33678	0.805032	1.66053	0.0968084	1	protein coding	melanoma cell adhesion molecule	0.336629	0.66132	0.701767	0.756251	0	0.102304	0	0.054993	0.095247	0.493211	0.266062	0.331025	15	25	22	22	0	2	0	1	2	10	6	9	13.7587	21.1567	19.058	23.2758	0	2.37246	0	1.10309	2.16796	11.1071	6.75705	6.95448
9	14797110	14815245	-1	ENSMUSG00000031933	Izumo1r	8.08092	2.32843	0.932432	1.42469	0.154247	1	protein coding	IZUMO1 receptor, JUNO	0.596053	1.69973	1.71006	1.55118	0	0	0.119862	0	0.677697	1.16736	0.733209	0.28274	10	25	18	19	0	0	1	0	6	10	7	3	9.76284	21.7912	18.6106	19.1322	0	0	1.11475	0	6.18162	10.535	7.46222	2.38044
13	108452866	108544316	1	ENSMUSG00000021697	Depdc1b	15.034	2.32796	0.757467	1.75315	0.0795759	1	protein coding	DEP domain containing 1B	1.49714	1.25729	2.17564	2.36836	0	0.285743	0.055289	0.353563	0.408992	0.912854	0.337903	2.05831	12	32	42	41	0	4	1	3	4	17	7	14	33.4441	21.9838	32.2925	39.8398	0	3.6217	0.701291	3.87618	5.088	11.2357	4.69028	23.6345
1	60926159	60954991	1	ENSMUSG00000026011	Ctla4	63.602	2.32228	0.690199	1.91579	0.0553917	1	protein coding	cytotoxic T-lymphocyte-associated protein 4	6.0725	3.6223	7.50473	10.0258	0.978855	0.151863	0.301639	0.245184	5.93054	2.41899	2.5026	2.84387	137	80	141	196	17	2	4	3	64	33	38	48	154.248	72.0187	126.661	191.77	14.5528	2.18869	4.35055	3.05649	83.8921	33.8552	39.4995	37.1313
13	23928956	23929585	-1	ENSMUSG00000069310	H3c3	228.413	2.31348	1.18289	1.1104	0.266825	1	protein coding	H3 clustered histone 3	56.6855	102.739	104.948	123.466	0.238606	3.43963	0.30654	2.02553	55.0413	90.1616	23.0766	44.2924	379	589	491	586	1	11	1	6	189	302	87	184	369.579	524.393	454.192	606.424	0.90023	12.4488	1.12652	6.39377	199.359	324.154	93.9864	148.004
7	19128362	19138029	-1	ENSMUSG00000040714	Klc3	14.995	2.30825	0.667266	1.96061	0.0499247	1	protein coding	kinesin light chain 3	2.05182	1.77724	2.30877	0.705954	0.430556	0.275712	0	1.53513	0.453993	0.62635	0.079737	0.885827	53	39	42	13	7	3	0	10	6	8	1	14	47.497	32.2021	35.5113	12.306	5.83357	3.62128	0	17.4403	5.85264	7.98887	1.14692	10.5403
1	74830675	74843338	1	ENSMUSG00000026167	Wnt10a	23.2144	2.29825	0.750808	1.72914	0.0837847	1	protein coding	wingless-type MMTV integration site family, member 10A	1.54735	2.50676	2.63191	1.13132	0	1.16037	0.403245	0	1.13481	1.11908	0.35208	0.361964	56	77	67	29	0	9	7	0	21	20	7	8	49.8271	63.1832	56.3129	27.4332	0	21.201	7.37314	0	20.3507	19.8555	7.0448	5.99131
8	120840891	120892045	1	ENSMUSG00000031824	6430548M08Rik	17.6733	2.29595	0.780591	1.66022	0.096871	1	protein coding	RIKEN cDNA 6430548M08 gene	0.863681	0.7322	0.798925	0.661523	0	0.294262	0.928867	0.158958	0.298011	0.047519	0.021378	0.328755	74	46	22	40	0	12	8	6	13	2	1	5	50.7028	33.6449	31.1633	29.244	0	9.80151	30.9626	4.57974	9.74286	1.53705	0.779825	9.92041
18	74328370	74340889	-1	ENSMUSG00000036223	Ska1	19.4192	2.29592	0.765779	1.69229	0.090591	1	protein coding	spindle and kinetochore associated complex subunit 1	1.20011	1.80801	2.22123	2.24147	0	0.601762	0	0.134486	0.611351	1.633	0.54114	0.639953	26	59	60	46	0	11	0	1	12	31	5	15	34.5608	40.7543	42.5024	48.608	0	9.83255	0	1.90072	9.80455	25.9112	9.68323	9.47301
16	43469230	43484509	-1	ENSMUSG00000071552	Tigit	20.3486	2.29562	0.978227	1.32446	0.18535	1	protein coding	T cell immunoreceptor with Ig and ITIM domains	3.53638	5.49268	5.16526	6.1106	0.559974	0	0	0.792604	2.92924	6.39929	0	1.14628	40	53	41	49	4	0	0	4	17	36	0	8	38.667	47.0084	37.526	50.3127	3.58367	0	0	4.25321	17.8366	38.5526	0	6.44245
6	70675433	70676051	1	ENSMUSG00000095351	Igkv3-2	348.996	2.29343	0.734056	1.76203	0.0780641	1	IG V gene	immunoglobulin kappa variable 3-2	175.745	629.015	429.501	146.3	30.8621	34.3363	32.0961	24.8978	233.46	269.794	86.5544	64.8909	496	1546	849	294	56	49	46	32	343	388	141	117	491.127	1377.02	798.282	307.808	50.5287	54.4965	50.9789	34.1802	363.681	415.6	150.95	93.3032
2	52318332	52566843	-1	ENSMUSG00000017412	Cacnb4	34.7639	2.28828	1.16748	1.10347	0.269822	1	protein coding	calcium channel, voltage-dependent, beta 4 subunit	0.154481	4.48828	0.21477	0.1798	0.271838	0.085719	0.034039	0.162081	0.222861	0.115518	2.16695	0.093506	19	19	19	16	21	5	2	9	14	7	8	7	11.0453	251.182	10.2031	9.68058	11.3759	3.47742	1.38192	5.68737	8.8738	4.55084	96.2718	3.4365
3	89322779	89325690	-1	ENSMUSG00000028044	Cks1b	38.3644	2.2853	0.675428	1.90294	0.0570481	1	protein coding	CDC28 protein kinase 1b	8.85929	11.808	9.79518	11.3523	1.24268	1.42061	0	0.659268	5.0839	9.26592	2.29414	4.6062	90	102	70	82	8	7	0	3	26	47	13	29	87.2509	91.0242	64.0977	84.1915	7.16321	7.9383	0	3.18649	27.8833	50.2806	14.0392	23.318
11	117740077	117746569	1	ENSMUSG00000017716	Birc5	97.4611	2.28001	0.9093	1.40768	0.159225	1	protein coding	baculoviral IAP repeat-containing 5	13.0471	18.9058	24.8389	16.1485	1.21204	0.293834	0.454583	0.777564	13.2013	11.7425	6.61281	7.63819	156	194	218	139	9	7	6	5	85	73	44	71	191.019	216.654	241.631	178.036	10.3862	2.44087	3.77903	5.587	107.635	94.7248	60.1586	57.482
3	10077608	10081667	1	ENSMUSG00000027533	Fabp5	30.7638	2.27782	0.654003	1.95384	0.0507201	1	protein coding	fatty acid binding protein 5, epidermal	2.11651	7.49383	3.12942	6.16531	0.592971	1.07191	0.343973	1.5936	4.91264	1.94704	0.225201	0.832865	27	80	28	58	7	8	8	18	32	12	6	9	37.1771	103.031	36.524	81.6078	6.09631	10.683	3.43072	13.7377	48.0558	18.844	2.45796	7.51984
6	68887395	68887957	-1	ENSMUSG00000076536	Igkv4-86	84.5945	2.27494	0.899745	1.417	0.156483	1	IG V gene	immunoglobulin kappa variable 4-86	26.2081	64.682	204.886	64.1177	4.95998	18.92	4.18645	8.57943	5.44513	6.25476	89.3098	49.9161	74	159	405	129	9	27	6	9	8	9	145	90	72.0433	139.244	374.415	132.792	7.9844	29.5247	6.53783	11.5804	8.34001	9.47842	152.627	70.5672
7	18828519	18832474	1	ENSMUSG00000040841	Six5	12.2178	2.26835	0.772172	1.64258	0.100471	1	protein coding	sine oculis-related homeobox 5	0.780403	0.70963	0.602161	0.88152	0.248256	0.093736	0	0	0.697924	0.225905	0.365637	0.109633	35	27	19	28	7	2	0	0	16	5	9	3	33.7024	23.9874	17.2788	28.6673	6.27508	2.29683	0	0	16.7851	5.37536	9.81162	2.43367
9	53295325	53313167	1	ENSMUSG00000034487	Poglut3	6.946	2.26553	0.999931	1.26562	0.20565	1	protein coding	protein O-glucosyltransferase 3	0.272488	0.578346	0.206531	0.333465	0.057804	0.343971	0.037947	0.082127	0	0	0	0.327736	15	27	8	13	2	9	1	2	0	0	0	11	14.4405	23.9902	7.27243	13.3075	1.79297	10.3428	1.14188	2.13599	0	0	0	8.92767
5	142946098	142958940	1	ENSMUSG00000029581	Fscn1	33.1447	2.26336	0.696154	1.81477	0.0695592	1	protein coding	fascin actin-bundling protein 1	2.75838	3.69792	1.6548	1.50066	0.281701	0.053158	0.10557	0.434032	1.63345	2.33247	0.599094	0.621823	109	124	46	42	7	1	2	6	33	24	13	15	97.6328	102.449	38.9174	39.9976	5.8359	1.06755	2.1217	7.53949	32.1975	45.4882	13.176	11.3132
11	79482038	79588849	1	ENSMUSG00000017639	Rab11fip4	185.006	2.25741	0.744897	1.68803	0.0914046	1	protein coding	RAB11 family interacting protein 4 (class II)	6.46822	8.40067	6.1938	10.2044	0.556885	0.748763	0.976142	0.263867	1.37872	5.5535	4.28207	4.90804	262	536	321	324	39	26	52	13	52	128	128	95	406.922	413.667	258.906	483.422	20.5055	26.727	34.8695	8.1469	48.3036	192.502	167.39	158.713
10	74803009	74852739	1	ENSMUSG00000040009	Gnaz	66.5943	2.24749	0.976442	1.27759	0.201395	1	protein coding	guanine nucleotide binding protein, alpha z subunit	5.47817	5.21747	2.33653	2.60737	0.158913	0.210082	0.538803	0.045152	2.66345	4.88875	0.858803	0.494396	209	211	85	98	5	5	5	1	56	108	25	16	235.581	175.62	66.7627	84.4343	3.99985	5.12595	13.1565	0.952921	63.7858	115.836	22.9482	10.9284
16	21753076	21766302	-1	ENSMUSG00000022856	Tmem41a	9.72951	2.23606	0.704967	1.75336	0.0795397	1	protein coding	transmembrane protein 41a	1.86882	2.34893	0.773697	0.920709	0.517711	0.133791	0.789044	0.1444	0.752248	0.768228	0	0.620341	30	36	10	12	6	1	7	1	6	7	0	7	31.288	30.7815	8.60675	11.6077	5.07312	1.27092	7.50094	1.18647	7.01368	7.08665	0	5.33849
3	30910099	30951341	1	ENSMUSG00000037661	Gpr160	14.7093	2.23106	0.790316	1.55768	0.119309	1	protein coding	G protein-coupled receptor 160	1.67681	3.14509	1.04094	1.61577	0	0.747948	0.175566	0.318796	1.90244	0.536127	0.098209	1.30831	51	54	20	36	0	13	2	2	19	7	2	2	33.5732	49.2894	13.8482	24.3613	0	8.49691	1.99597	3.13257	21.2127	5.9145	1.22183	13.4648
12	115721604	115722081	-1	ENSMUSG00000096074	Ighv1-72	717.047	2.21983	0.646276	1.88748	0.0590963	1	IG V gene	immunoglobulin heavy variable 1-72	1279.63	401.783	277.918	262.24	87.1002	77.9754	81.0471	109.101	342.428	208.376	202.111	433.427	3944	1076	599	575	172	121	126	153	548	326	357	850	3898.58	958.26	562.311	601.207	155.169	134.843	139.92	163.342	580.765	349.317	382.492	678.359
12	69215588	69225783	1	ENSMUSG00000034883	Lrr1	7.06378	2.21479	0.823419	1.4753	0.140133	1	protein coding	leucine rich repeat protein 1	1.18925	2.55653	1.17364	0.410242	0.178194	0.101243	0.692822	0	0.757047	0.195719	0.878563	0.363891	12	26	14	6	1	1	3	0	8	2	10	2	16.535	27.8223	10.8424	4.29521	1.45012	0.79869	5.46964	0	5.86179	1.49936	7.59022	2.60065
9	92424276	92490481	1	ENSMUSG00000032374	Plod2	8.25138	2.20109	0.924552	1.29911	0.193907	1	protein coding	procollagen lysine, 2-oxoglutarate 5-dioxygenase 2	0.613879	0.960967	0.734824	0.535395	0.458883	0	0.647711	0	0.529111	0.073505	0	0.191131	34	45	12	21	7	0	4	0	6	2	0	2	18.2686	22.3842	14.53	11.998	7.99288	0	10.9449	0	8.76891	1.20527	0	2.92371
14	11307738	12919681	1	ENSMUSG00000060579	Fhit	6.06791	2.19989	0.943014	1.2724	0.203231	1	protein coding	fragile histidine triad gene	1.70622	2.14757	2.96631	2.5088	0	0	0.396685	0.665161	0.492168	3.47263	0.694065	0.156172	18	19	9	7	0	0	2	2	1	11	4	1	11.8344	11.6592	13.6706	13.1036	0	0	1.5623	2.26423	1.90109	13.2713	2.99132	0.556794
15	78915074	78922553	1	ENSMUSG00000006378	Gcat	13.6255	2.19689	0.732723	1.63348	0.102368	1	protein coding	glycine C-acetyltransferase (2-amino-3-ketobutyrate-coenzyme A ligase)	0.895517	1.36129	1.51961	1.29465	0	0.367866	0	0.195643	0.790889	0.935834	0.467742	0.378342	31	40	37	32	0	6	0	3	14	16	2	8	25.6699	30.5428	28.9428	28.1712	0	5.91683	0	2.75229	12.6253	14.7805	8.53024	5.57459
2	33619965	33777958	-1	ENSMUSG00000038740	Mvb12b	36.5049	2.19006	0.747511	1.59203	0.111378	1	protein coding	multivesicular body subunit 12B	3.88985	1.14356	1.0113	1.2755	0.103578	1.67415	0.308637	0.264965	2.49411	0.396047	0.236469	0.213664	128	74	25	67	5	9	8	9	17	15	9	10	177.551	40.8565	30.671	43.8415	2.76719	43.3576	7.99916	5.93552	63.3991	9.96045	6.70681	5.01304
7	127975345	128020482	-1	ENSMUSG00000030844	Rgs10	135.693	2.18778	0.676175	1.75662	0.0789827	1	protein coding	regulator of G-protein signalling 10	24.3335	18.5442	56.4254	49.1059	1.33331	2.22593	7.50727	20.4379	4.89617	10.5315	17.5121	27.1278	260	168	423	372	9	10	39	81	24	56	104	179	243.068	144.991	374.505	369.378	7.79533	12.6158	42.5806	100.194	27.2368	57.9637	108.696	139.289
2	164195990	164231015	-1	ENSMUSG00000017002	Slpi	540.876	2.1836	1.62331	0.729127	0.465924	1	protein coding	secretory leukocyte peptidase inhibitor	224.845	147.274	82.5317	57.2378	1.19229	0.58449	0	0	141.99	120.323	42.8551	38.5709	2388	1335	613	431	8	3	0	0	774	636	253	253	2313.09	1185.89	564.14	443.408	7.17906	3.41166	0	0	813.469	682.023	273.942	203.96
19	37364851	37410307	1	ENSMUSG00000012443	Kif11	266.357	2.17701	0.996178	1.18153	0.237393	1	protein coding	kinesin family member 11	6.28745	10.8823	14.4844	10.9344	0.365846	0.160644	0.497006	0.152916	6.35361	8.88435	2.72863	7.09503	460	681	742	556	17	4	17	5	234	322	103	309	426.661	578.015	653.083	558.749	14.5306	6.18519	19.1502	5.09261	240.106	332.181	115.054	247.48
6	116314985	116386501	1	ENSMUSG00000025702	Marchf8	32.6491	2.17475	0.873157	1.34541	0.178493	1	protein coding	membrane associated ring-CH-type finger 8	3.99075	1.34961	1.31442	4.33546	2.20174	0.538874	2.51051	0.104793	0.513951	1.91066	0.028181	0.070571	117	79	25	25	7	16	9	3	17	35	1	2	114.55	30.322	25.0689	93.7105	36.9901	8.77622	40.9173	1.47622	8.21558	30.218	0.502626	1.04122
12	24758240	24764145	1	ENSMUSG00000020649	Rrm2	151.563	2.17303	0.846071	1.38645	0.165611	1	protein coding	ribonucleotide reductase M2	11.2042	18.3322	19.3871	18.8368	1.50083	0.459184	0.655544	0.553819	10.2768	11.6296	6.8729	9.74017	356	486	402	411	30	3	3	5	167	169	100	178	268.796	344.244	309.039	340.3	21.0743	6.2504	8.92996	6.52063	137.302	153.726	102.455	120.112
11	69686894	69692683	-1	ENSMUSG00000042826	Fgf11	5.55918	2.17237	0.863329	1.35796	0.174477	1	protein coding	fibroblast growth factor 11	0.551115	0.415765	0.076326	0.379013	0.042685	0.169112	0.279881	0	0.172506	0.217466	0.048873	0.043964	25	16	2	10	1	3	5	0	4	4	1	1	20.8728	12.3253	1.92075	10.8095	0.946226	3.63406	6.0189	0	3.63847	4.53808	1.15015	0.855877
12	114450756	114451189	-1	ENSMUSG00000095442	Ighv1-4	62.8433	2.15049	0.621096	1.85236	0.0639742	1	IG V gene	immunoglobulin heavy variable 1-4	112.222	32.3262	107.526	6.29901	6.97366	16.0655	7.99579	13.439	37.4627	47.5458	17.4023	27.3706	275	69	184	11	11	20	10	15	48	59	25	43	273.31	61.454	173.567	11.5354	9.92626	22.1677	11.0411	16.0397	50.9565	63.175	26.7321	34.2145
7	103475741	103477303	-1	ENSMUSG00000052305	Hbb-bs	24.917	2.14842	1.36051	0.844106	0.39861	1	protein coding	hemoglobin, beta adult s chain	10.3825	27.6405	3.92479	0.910507	0	1.84476	0.830362	0	5.45766	16.8146	2.89162	0.295175	69	153	18	4	0	6	1	0	19	56	11	1	60.7098	126.89	15.0237	3.73495	0	6.12585	2.75943	0	18.0825	54.2316	10.7211	0.725701
6	68811830	68812291	-1	ENSMUSG00000076534	Igkv12-89	107.309	2.14608	1.01563	1.12844	0.259135	1	IG V gene	immunoglobulin kappa chain variable 12-89	174.441	85.5514	152.204	68.4377	9.71428	0.862898	9.44355	13.7386	187.244	6.01198	27.8753	67.744	396	170	242	111	14	1	11	14	222	7	36	99	392.65	150.729	227.637	116.002	12.7981	1.10204	12.0697	15.1768	234.714	7.4562	38.9875	78.3803
11	86979979	86999534	-1	ENSMUSG00000020493	Prr11	33.6457	2.1442	0.667918	1.71309	0.086696	1	protein coding	proline rich 11	1.06949	1.34255	2.40234	1.6807	0.082339	0.326691	0.072081	0.077994	0.877645	1.53886	0.314581	0.792293	62	66	98	69	3	9	2	2	26	44	10	28	59.6884	58.648	89.0853	70.6343	2.68966	10.345	2.28422	2.13626	27.2777	47.3211	10.9092	22.7288
13	23718076	23718474	1	ENSMUSG00000061991	H2ac10	276.244	2.14013	1.2503	0.911882	0.361831	1	protein coding	H2A clustered histone 10	135.939	266.55	288.113	271.331	2.84331	6.57441	0	3.43317	175.02	229.133	69.2068	120.522	425	723	630	604	6	10	0	5	284	364	124	240	418.824	642.171	589.662	629.692	5.39828	11.1171	0	5.32304	300.155	389.026	132.525	191.04
9	62326774	62444326	-1	ENSMUSG00000041729	Coro2b	57.7202	2.12964	0.920675	1.22697	0.219836	1	protein coding	coronin, actin binding protein, 2B	6.3542	7.75931	2.57931	6.78597	0.058348	0.157407	2.14558	0.592008	6.2374	3.50643	2.18735	0.923218	306	155	85	98	2	2	6	6	55	51	29	17	156.498	149.582	42.2092	125.855	0.84111	2.19964	30.0051	7.15574	85.5512	47.5831	33.4745	11.6877
2	152179342	152185952	-1	ENSMUSG00000032715	Trib3	18.6927	2.12263	0.870731	1.28929	0.197296	1	protein coding	tribbles pseudokinase 3	1.92497	3.6552	0.977631	1.01906	0.05463	0	0.572521	2.67388	0.268805	1.18242	0.062497	0.78712	56	41	20	21	1	0	8	18	4	17	1	14	47.3619	70.3925	15.9823	18.8807	0.78671	0	7.99838	32.2869	3.68314	16.0294	0.95546	9.95462
6	68414424	68414909	1	ENSMUSG00000076523	Igkv15-103	349.788	2.12235	0.658159	1.70529	0.0881409	1	IG V gene	immunoglobulin kappa chain variable 15-103	338.198	366.23	469.449	141.776	40.2725	31.2833	31.8567	70.2958	105.704	337.121	168.153	70.916	941	887	914	281	72	44	45	89	153	478	269	126	932.089	790.04	859.675	294.24	64.964	48.919	49.853	95.0815	162.239	511.933	287.966	100.463
18	24786748	24834632	1	ENSMUSG00000039616	Mocos	11.2436	2.11852	0.788663	1.41824	0.156119	1	protein coding	molybdenum cofactor sulfurase	0.741116	0.818923	0.921757	0.546235	0.346856	0.057254	0	0	0.679584	0.441769	0.099279	0.341574	32	30	28	15	8	1	0	0	15	8	2	9	28.5653	24.7062	23.6063	15.8542	7.82492	1.2521	0	0	14.5872	9.38184	2.37771	6.76729
4	21931329	21996839	1	ENSMUSG00000028246	Faxc	19.1716	2.10082	0.673177	1.63526	0.101994	1	protein coding	failed axon connections homolog	2.05142	0.606187	0.789075	0.26254	0.243233	0.154211	0.061243	0.352137	0.602045	0.675537	0.140991	0.54959	93	28	21	10	6	5	2	10	21	14	3	13	99.0874	22.9182	25.3245	9.54931	6.87647	4.22628	1.67967	8.34747	16.1945	17.9785	4.2316	13.6452
9	54272442	54408910	-1	ENSMUSG00000041268	Dmxl2	86.0566	2.10034	0.781459	1.40806	0.159112	1	protein coding	Dmx-like 2	1.22263	2.66661	2.56193	1.84954	0.15003	0.20207	0.309813	0.036836	0.445463	1.7725	1.06682	1.38316	169	274	228	152	14	16	8	2	38	89	37	95	134.319	229.304	187.012	153.009	9.64715	12.5958	19.3262	1.98609	27.254	107.293	72.8251	78.1077
15	103252713	103275190	-1	ENSMUSG00000000555	Itga5	8.59693	2.09883	1.09451	1.00395	0.315402	1	protein coding	integrin alpha 5 (fibronectin receptor alpha)	0.5229	0.317182	0.063688	0.801788	0	0.601236	0	0.270276	0.029239	0.212095	0.299826	0	35	18	3	20	0	2	0	8	1	7	11	0	24.4037	11.5866	1.97493	28.178	0	15.9208	0	6.1905	0.759942	5.45391	8.69473	0
1	170104889	170114338	1	ENSMUSG00000102418	Sh2d1b1	13.8632	2.09874	0.861926	1.27475	0.202397	1	protein coding	SH2 domain containing 1B1	1.87107	0.943589	0.683985	0.113216	0.510028	0.22452	0	0	0.679617	0.324804	0.486637	0.350207	70	30	18	3	12	4	0	0	13	6	10	8	67.4308	26.6531	16.3785	3.07247	10.7582	4.59095	0	0	13.6398	6.44956	10.8974	6.4874
11	102961130	102992484	-1	ENSMUSG00000020937	Plcd3	35.7682	2.09547	0.562133	1.94877	0.0513232	1	protein coding	phospholipase C, delta 3	4.05715	1.69865	2.3634	2.22255	1.30475	0.64489	0.074591	0.970057	1.51802	1.70712	0.242374	0.690402	183	65	75	71	37	2	1	12	35	38	6	19	138.534	45.3996	53.6207	57.1481	26.076	12.494	1.4462	16.256	28.8662	32.1175	5.14249	12.1176
6	68518628	68519406	1	ENSMUSG00000076525	Igkv1-99	79.5895	2.09503	1.5109	0.724754	0.468603	1	IG V gene	immunoglobulin kappa variable 1-99	3.90985	253.902	24.5293	35.6614	4.85661	3.85084	9.20153	0	18.0129	155.802	0	17.3617	10	618	48	71	8	5	12	0	24	222	0	31	10.3487	526.02	43.1391	71.0407	7.52382	5.78312	13.8291	0	26.5514	227.217	0	23.621
1	71624679	71692359	-1	ENSMUSG00000026193	Fn1	35.8313	2.0932	0.89889	1.21617	0.22392	1	protein coding	fibronectin 1	0.704931	2.90784	5.22412	2.6062	0	1.72892	1.88641	0.039163	0.860373	1.56683	1.21229	0.056858	83	133	211	119	0	14	6	2	5	10	14	4	24.035	77.6029	118.35	66.914	0	33.4466	36.5207	0.655326	16.3365	29.4348	25.6834	0.996472
5	37399284	37449477	1	ENSMUSG00000029121	Crmp1	5.02359	2.0883	0.963826	1.12914	0.258838	1	protein coding	collapsin response mediator protein 1	0.485815	0.853207	0.197299	0.612029	0	0.12725	0.856418	0.068442	0.316695	0.093744	0.042145	0.339268	21	18	6	10	0	2	5	1	1	2	1	1	10.5869	14.5534	2.85682	10.0435	0	1.57339	10.5972	0.731985	3.84341	1.1256	0.570679	3.80033
11	46625907	46670405	1	ENSMUSG00000040405	Havcr1	48.0833	2.07823	0.577526	1.86698	0.061904	1	protein coding	hepatitis A virus cellular receptor 1	3.4926	4.5761	8.80724	4.32031	0.926668	0.647141	0.617913	0.167434	2.70846	4.6863	2.12024	1.85129	99	110	80	60	17	9	8	2	40	46	34	33	84.3838	86.5397	141.387	78.6026	13.1043	8.87132	8.47701	1.98533	36.4425	62.3851	31.8305	22.9913
X	52779085	52799673	-1	ENSMUSG00000054626	Xlr	5.60311	2.06982	1.06895	1.00082	0.316916	1	protein coding	X-linked lymphocyte-regulated	0.83807	0	1.15305	1.71981	0.481025	0.335922	0.15746	0.256014	0	0.325761	0.80959	0	11	0	10	16	8	2	2	3	0	2	6	0	13.0739	0	11.9518	20.203	4.39209	2.97333	1.39476	1.96005	0	2.80004	8.48838	0
10	69170976	69188768	-1	ENSMUSG00000019942	Cdk1	93.4215	2.06601	1.05472	1.0107	0.312161	1	protein coding	cyclin-dependent kinase 1	8.35754	17.405	11.3288	17.1682	0.381037	2.48604	0.218973	0.033841	6.18477	12.2227	8.48464	6.13932	116	177	127	137	16	7	7	1	59	85	43	48	149.151	243.125	134.335	230.72	3.98009	25.1731	2.21892	0.296397	61.4676	120.186	94.0872	56.3178
17	90215890	90217877	-1	ENSMUSG00000066878	Gm10184	9.94931	2.06585	0.880831	1.21005	0.22626	1	protein coding	predicted pseudogene 10184	1.18016	0.847267	0.657175	0.876798	0	0.252648	0	0	0.714481	0.495944	0.544021	0.488874	34	20	13	18	0	3	0	0	10	7	9	9	32.7785	17.7705	11.8422	18.4474	0	3.43964	0	0	10.4956	7.52311	9.80093	7.2938
13	21906214	21906737	1	ENSMUSG00000114279	H2bc14	130.822	2.06509	0.958362	1.11137	0.266411	1	protein coding	H2B clustered histone 14	37.0627	69.7144	88.8196	87.1464	3.16334	1.62527	4.43732	0.890728	51.7849	58.958	31.1285	33.1806	186	301	312	310	10	4	11	2	134	149	88	104	182.13	268.089	290.085	321.918	9.0107	4.50371	12.3327	2.13169	141.551	159.888	94.7984	83.428
1	132284053	132319019	-1	ENSMUSG00000042066	Tmcc2	7.29431	2.06457	0.610575	1.74355	0.081237	1	protein coding	transmembrane and coiled-coil domains 2	0.213531	0.589209	0.346486	0.519302	0.156864	0.172905	0.152556	0.132113	0.064307	0.233212	0.029968	0.161735	12	21	10	5	6	5	3	3	2	7	1	6	9.81949	21.2084	10.587	17.9829	4.2221	4.51143	3.98347	2.98164	1.64688	5.90908	0.856319	3.82304
X	59044824	59076119	1	ENSMUSG00000031138	F9	7.70864	2.06401	1.09626	0.97058	0.331758	1	protein coding	coagulation factor IX	0.716694	0.553373	0.210783	0.418721	0.039302	0.311517	0	0	0.821793	0	0.04501	0.161952	29	19	6	12	1	6	0	0	17	0	1	4	27.9283	16.8787	5.45764	12.2871	0.896407	6.88769	0	0	17.834	0	1.08985	3.24397
13	23735432	23735822	-1	ENSMUSG00000069274	H4c6	91.3417	2.06278	0.950463	1.11817	0.263493	1	protein coding	H4 clustered histone 6	41.8753	90.2849	104.012	89.8023	7.36211	4.69297	6.14273	0	49.585	70.6913	43.8305	29.0432	126	236	219	192	14	7	9	0	78	108	76	56	124.598	210.173	205.637	200.818	12.6288	7.79658	9.98873	0	82.6762	115.702	81.4041	44.6782
19	42135839	42140142	1	ENSMUSG00000044345	Marveld1	15.9147	2.05476	0.586723	1.79771	0.0722231	1	protein coding	MARVEL (membrane-associating) domain containing 1	0.873433	1.07234	1.00779	0.5858	0.208394	0.760235	0	0.185745	0.170875	0.32089	0.437678	0.344222	40	42	33	19	6	17	0	4	4	9	11	10	39.8209	38.267	30.5289	20.1115	5.5609	19.6657	0	4.15601	4.33845	8.06081	12.399	8.06675
2	11176919	11306033	1	ENSMUSG00000026778	Prkcq	20.4171	2.05279	0.742156	1.41855	0.15603	1	protein coding	protein kinase C, theta	0.570144	1.62495	2.32131	0.809111	0.297185	0.292191	0.179622	0	0.242805	0.189885	1.57463	0.482388	31	47	28	31	6	8	5	0	7	4	42	13	23.6694	52.8023	64.0315	25.2943	7.22116	6.88253	4.23417	0	5.61352	4.34344	40.619	10.2938
9	65797519	65810548	1	ENSMUSG00000040204	Pclaf	126.986	2.04929	0.90479	1.15971	0.246167	1	protein coding	PCNA clamp associated factor	12.247	21.866	27.4552	20.3507	1.06184	0.971703	1.14274	0.296883	7.90648	22.165	7.77443	13.2075	278	385	359	329	7	6	5	1	129	227	91	174	200.366	280.302	298.404	250.677	10.1662	9.01851	10.6139	2.38334	72.0622	199.77	79.0204	111.051
13	23936250	23936869	1	ENSMUSG00000069267	H3c2	477.682	2.04438	1.13252	0.922171	0.356439	1	protein coding	H3 clustered histone 2	116.569	184.455	266.806	224.869	5.31706	0	13.3006	10.8628	136.857	186.125	78.1813	99.4563	761	1032	1219	1041	22	0	43	32	460	608	286	405	741.114	917.339	1126.19	1075.84	19.7747	0	48.3424	34.0442	484.473	651.522	308.389	325.161
6	70193842	70194405	-1	ENSMUSG00000076583	Igkv8-24	386.079	2.03643	0.82058	1.26305	0.206573	1	IG V gene	immunoglobulin kappa chain variable 8-24	496.699	589.452	273.242	65.3241	57.6559	30.6249	39.4171	37.4133	117.069	532.615	102.538	127.223	1312	1357	505	123	98	41	53	45	161	718	156	215	1301.23	1208.71	475.628	128.869	88.407	45.5216	58.6342	48.1028	170.797	768.81	166.915	171.319
16	18439252	18448704	-1	ENSMUSG00000072214	Septin5	8.96202	2.03458	1.12383	0.920582	0.357269	1	protein coding	septin 5	1.32383	1.21275	0.628185	0.226967	0	0	0.586915	0	0.615786	0.563559	0.704715	0	41	23	10	5	0	0	5	0	9	8	12	0	32.9915	24.0808	10.402	4.6119	0	0	8.3052	0	8.50167	7.73838	10.9127	0
7	143989470	144024746	-1	ENSMUSG00000031078	Cttn	17.2467	2.02889	0.776938	1.32429	0.185408	1	protein coding	cortactin	0.899888	4.5046	0.524765	1.1077	0	0.170518	0.985447	0.544364	0.451379	1.40252	0.588502	0.869688	39	49	16	34	0	4	2	1	10	30	14	23	22.254	87.1939	8.62269	20.6278	0	2.39259	13.8375	6.60677	6.21637	19.1104	9.0431	11.0551
11	5919644	6016362	-1	ENSMUSG00000057897	Camk2b	24.0089	2.02665	0.541017	1.89763	0.0577446	1	protein coding	calcium/calmodulin-dependent protein kinase II, beta	3.30631	1.25319	1.11761	0.92595	0.334215	1.14384	0.400448	0.954479	0.921785	0.506622	0.193107	0.738514	148	38	35	25	7	18	8	13	12	9	3	15	111.287	33.0163	24.9947	23.4694	6.58423	21.8447	7.65337	15.7669	17.2785	9.39565	4.03876	12.7773
13	120724650	120726053	1	ENSMUSG00000095071	AF067061	11.4177	2.0263	0.729838	1.4062	0.159665	1	protein coding	cDNA sequence AF067061	2.33624	2.73742	3.06343	2.24073	0.739624	0.810999	1.92211	0	0.380031	1.31448	0	2.17478	25	25	23	17	5	6	10	0	3	7	0	15	26.1518	23.9847	22.785	18.8879	4.84588	5.1509	12.217	0	2.36907	8.10734	0	12.5134
X	149589366	149597341	-1	ENSMUSG00000025268	Maged2	19.655	2.0226	0.649161	1.57527	0.115194	1	protein coding	MAGE family member D2	3.08412	2.02476	2.59821	1.71866	0.30229	0.499204	1.73984	1.37721	1.74875	0.344797	0	1.49266	77	58	56	37	5	9	6	9	18	5	0	6	61.9366	31.8273	34.6696	25.9907	3.55319	5.68818	19.8395	13.5736	19.5577	3.81522	0	15.4083
6	126900013	126916550	-1	ENSMUSG00000030346	Rad51ap1	38.1086	2.02089	0.641157	1.59226	0.111327	1	protein coding	RAD51 associated protein 1	9.09776	7.35673	8.44066	9.81739	0.855097	4.35428	0.692025	0.450501	7.29483	6.02013	0.627175	4.96253	61	75	79	77	12	13	8	1	38	23	9	34	99.6217	63.0543	61.4122	80.9521	5.48041	27.053	4.30275	2.421	44.4846	36.3217	4.26734	27.9319
19	10160252	10174241	1	ENSMUSG00000010663	Fads1	23.7444	2.01435	0.594975	1.70487	0.0882195	1	protein coding	fatty acid desaturase 1	1.20864	1.28932	1.85404	1.56107	0.064182	0.291618	0.361982	0.455894	1.02789	1.36755	0.11031	0.503355	63	57	68	45	2	3	5	10	19	31	3	16	49.8323	41.6089	50.7918	48.4675	1.54885	6.82198	8.47435	9.22484	23.6015	31.0671	2.82605	10.6676
12	107876662	107969861	-1	ENSMUSG00000048251	Bcl11b	17.8488	2.01117	0.732604	1.38024	0.167512	1	protein coding	B cell leukemia/lymphoma 11B	0.801439	0.550143	0.234312	0.71672	0.025106	0.402974	0.245311	0.124915	0.185245	0	0.259251	0.52922	44	28	7	40	2	8	7	7	12	0	18	24	59.036	31.7199	11.4683	39.7565	1.08244	16.8424	10.2605	4.51585	7.59919	0	11.8663	20.0383
X	135856014	135876246	-1	ENSMUSG00000089996	Tmsb15b2	5.64356	1.99944	1.18085	0.84637	0.397347	1	protein coding	thymosin beta 15b2	13.467	13.5625	0	18.4826	6.00261	3.52747	0	0	4.11312	5.00963	0	16.196	15	13	0	15	4	2	0	0	2	3	0	21	16.3231	12.414	0	17.0533	3.86048	2.33325	0	0	2.28079	3.41392	0	10.0437
13	23935109	23935581	1	ENSMUSG00000061615	H2ac4	403.783	1.99617	0.799404	1.24614	0.212711	1	protein coding	H2A clustered histone 4	167.46	223.546	281.835	328.493	17.9807	13.758	16.5593	18.3125	151.103	274.627	71.9358	140.881	708	816	834	987	48	29	35	35	331	586	173	376	695.443	726.931	777.805	1027.31	43.2677	32.5356	39.128	37.3206	350.015	628.535	186.006	301.1
14	66056487	66071443	-1	ENSMUSG00000022034	Esco2	58.5453	1.99497	0.940541	1.05787	0.290115	1	protein coding	establishment of sister chromatid cohesion N-acetyltransferase 2	1.45366	2.85796	8.85147	3.64564	0.183494	0.157657	0.144453	0.15638	3.40814	3.16189	1.09293	2.91391	63	89	117	104	5	4	3	3	77	69	26	57	55.2335	84.9971	223.466	104.31	4.08073	3.39885	3.11651	2.91609	72.1159	66.1952	25.8036	56.9104
12	115322760	115323192	-1	ENSMUSG00000094087	Ighv1-61	78.7341	1.98903	0.875288	1.12995	0.258496	1	IG V gene	immunoglobulin heavy variable 1-61	58.8096	16.4821	244.074	32.6326	26.1376	0.927919	6.35942	17.1724	40.2367	25.3699	72.3396	41.3737	144	35	418	57	41	1	8	19	51	32	102	65	143.115	31.1723	394.299	59.7743	36.9979	1.10839	8.83288	20.3169	54.1412	34.2644	109.067	51.7196
7	89156991	89176395	-1	ENSMUSG00000039405	Prss23	14.6632	1.9865	1.03949	0.949021	0.34261	1	protein coding	protease, serine 23	1.76793	2.93926	0.924706	0.087523	0	0.34757	1.76674	0.140073	0.918671	1.34001	0	0.169367	11	48	14	3	0	8	4	3	13	32	0	5	42.2954	55.0394	14.699	1.57675	0	4.71789	23.9996	1.6446	12.2394	17.6634	0	2.08274
2	119448779	119481725	1	ENSMUSG00000027306	Nusap1	109.439	1.98449	0.930541	1.05798	0.290067	1	protein coding	nucleolar and spindle associated protein 1	4.10431	7.07844	8.05183	8.4781	0.108214	0.66618	0.314171	0.15371	4.77304	4.77905	4.75721	3.6796	173	250	253	241	3	16	8	3	110	104	60	99	167.327	225.878	218.112	260.278	2.58219	15.4098	7.27273	3.07545	108.367	107.352	120.511	77.1089
2	6193276	6217844	-1	ENSMUSG00000039063	Echdc3	17.8568	1.98365	0.72941	1.34856	0.177478	1	protein coding	enoyl Coenzyme A hydratase domain containing 3	3.19552	1.39105	2.15126	2.9375	0.711729	0.771072	0	2.13873	2.02545	0.846559	0	0.987075	51	29	26	25	9	8	0	23	14	11	0	10	57.3908	19.5548	25.6716	39.7274	7.48158	7.85734	0	18.8511	20.258	8.3772	0	9.11232
9	44910038	44920925	-1	ENSMUSG00000032093	Cd3e	11.303	1.98281	0.623025	1.57749	0.114683	1	protein coding	CD3 antigen, epsilon polypeptide	1.34783	0.763178	3.26832	2.18894	0.640672	0.111973	1.22153	0.449627	0.734687	0.302471	0.633567	1.27106	27	13	14	32	2	2	5	4	8	3	7	17	20.9151	9.26959	33.6983	25.5783	5.81887	0.985867	10.763	3.42418	6.34896	2.58613	6.10895	10.1384
12	73631570	73824959	1	ENSMUSG00000021108	Prkch	13.9886	1.97713	0.655264	1.4912	0.135909	1	protein coding	protein kinase C, eta	0.58339	0.506993	0.40947	1.40581	0.1046	0.577681	0.508539	0.050922	0.178147	0.265285	0.041066	0.386753	31	23	15	53	3	13	12	1	5	7	1	12	28.1137	19.1237	13.1111	51.0151	2.95032	15.7953	13.9152	1.20434	4.78095	7.04391	1.22967	9.58013
15	78312764	78323503	1	ENSMUSG00000033287	Kctd17	11.702	1.97578	0.699125	1.39571	0.1628	1	protein coding	potassium channel tetramerisation domain containing 17	2.40532	1.66273	1.52227	2.17676	0.102307	1.17273	0	0.85375	1.3425	1.29375	0.145575	1.05535	52	23	19	16	1	7	0	7	12	8	1	10	35.2018	19.0468	14.8027	23.9892	0.876348	9.73804	0	6.13201	10.9416	10.4324	1.32382	7.93905
11	98883769	98915015	-1	ENSMUSG00000020914	Top2a	924.335	1.9756	0.806615	1.2095	0.226472	1	protein coding	topoisomerase (DNA) II alpha	22.6919	42.2399	50.2895	41.7036	4.67209	3.3457	1.00354	2.65829	25.5869	39.8841	11.4468	22.2876	1595	2164	2273	2002	152	79	35	71	919	1233	449	861	1383.97	2016.47	2037.95	1914.88	166.781	115.778	34.7535	79.5684	869.063	1340.29	433.802	698.713
7	135291513	135318090	-1	ENSMUSG00000031004	Mki67	3129.5	1.97306	1.00527	0.967954	0.333067	1	protein coding	antigen identified by monoclonal antibody Ki 67	37.4706	56.6054	60.9014	57.5449	2.04381	1.84061	0.715002	1.64606	37.7525	58.0723	20.2379	29.7586	5853	7403	6555	6444	203	138	54	115	2969	4524	1720	2780	5630.41	6657.59	6080.44	6511.31	179.749	156.924	61.0045	121.387	3159.16	4807.94	1889.57	2298.48
3	96177068	96177448	1	ENSMUSG00000105827	H2bc18	370.06	1.97277	0.559715	1.73798	0.0822145	1	protein coding	H2B clustered histone 18	248.492	350.945	357.578	365.98	55.8997	52.4545	39.1622	38.2781	223.843	275.166	113.172	151.226	713	875	718	747	103	76	57	50	334	402	186	277	705.78	779.346	674.835	781.871	92.9385	84.5604	63.196	53.4051	354.102	430.609	199.143	220.933
13	22227384	22227846	1	ENSMUSG00000069300	H2bc11	233.624	1.97055	0.576151	1.68453	0.0920787	1	protein coding	H2B clustered histone 11	110.989	152.627	157.055	170.759	17.129	23.283	17.2231	17.7223	99.7101	118.114	57.8059	74.0802	452	537	448	495	45	47	35	33	210	243	134	191	444.237	478.382	418.177	515.492	40.5662	52.6923	39.0929	35.1929	222.132	260.612	144.017	152.897
17	35823631	35827721	-1	ENSMUSG00000050410	Tcf19	55.0323	1.97017	0.695955	1.39402	0.163313	1	protein coding	transcription factor 19	4.66911	5.79586	10.3021	5.81038	0.886471	0.970154	0.089223	0.387013	7.27928	5.4268	1.87047	1.89316	106	108	153	88	13	11	1	4	64	59	24	27	99.7373	96.9062	146.221	93.463	11.0832	11.7583	1.08219	4.05723	86.5938	63.8716	24.8269	20.7869
13	21934364	21934675	-1	ENSMUSG00000064288	H4c12	193.962	1.96683	0.579072	1.66962	0.0949945	1	protein coding	H4 clustered histone 12	162.686	252.929	314.962	303.972	16.0846	42.4603	37.775	42.6562	159.701	203.01	98.4352	137.549	314	429	425	419	20	42	38	38	161	202	110	172	313.764	381.812	403.34	440.863	18.0332	46.3129	41.6933	40.7297	171.126	215.821	117.554	136.491
2	129110130	129139132	-1	ENSMUSG00000048327	Ckap2l	78.9131	1.9543	0.934669	1.02101	0.307252	1	protein coding	cytoskeleton associated protein 2-like	2.96143	4.31985	5.93519	4.6929	0.203338	0.31355	0.088952	0.144424	4.33493	3.58361	1.0483	3.24798	139	172	196	156	6	7	2	3	104	83	27	93	133.872	152.85	178.271	159.75	5.38002	8.04218	2.28323	3.2041	109.13	89.2583	29.4456	75.4707
12	114072621	114073050	-1	ENSMUSG00000094102	Ighv9-2	75.8497	1.95343	0.818259	1.16519	0.243941	1	IG V gene	immunoglobulin heavy variable V9-2	28.2112	173.395	18.6808	93.1556	10.281	5.62294	11.3506	9.85528	18.8126	101.184	44.4399	25.6293	69	371	32	163	16	7	14	11	24	127	63	40	68.5759	330.427	30.1856	170.933	14.4382	7.75871	15.4575	11.7624	25.4782	135.987	67.365	31.8275
6	70291879	70292456	-1	ENSMUSG00000076586	Igkv8-21	613.817	1.95314	0.847738	1.12434	0.260869	1	IG V gene	immunoglobulin kappa variable 8-21	230.423	1394.28	367.283	181.92	60.5368	95.5811	95.1737	74.7775	266.982	862.822	61.0205	72.5452	664	3495	741	373	112	139	139	98	400	1266	101	133	657.202	3112.89	696.391	390.371	101.058	154.677	154.133	104.671	424.064	1356.12	108.143	106.083
7	79944198	79966007	1	ENSMUSG00000038943	Prc1	199.542	1.95229	0.862936	1.10354	0.269791	1	protein coding	protein regulator of cytokinesis 1	12.2836	17.6802	22.0626	21.4769	0.577639	1.80453	2.81761	0.680731	17.8346	20.73	4.17769	4.41866	301	396	425	376	18	32	19	15	202	196	70	117	340.148	383.213	405.937	447.845	9.36221	28.3523	44.3027	9.25121	275.031	316.29	71.8835	62.8944
4	43631935	43651244	1	ENSMUSG00000028469	Npr2	11.1968	1.95126	0.752028	1.26493	0.205896	1	protein coding	natriuretic peptide receptor 2	0.381344	0.554021	1.7598	1.13768	0.104648	0.678475	0.119467	0.148563	0.193091	0.696075	0	0.592436	20	26	8	22	2	13	3	2	3	19	0	11	12.1316	13.7955	37.198	27.2541	1.94854	12.2465	2.15801	2.31948	3.42088	12.201	0	9.68767
15	33083275	33594698	1	ENSMUSG00000039007	Cpq	21.9606	1.94392	0.717697	1.3152	0.188442	1	protein coding	carboxypeptidase Q	4.91428	2.72341	1.92068	0.874669	0.808079	1.11302	0.465864	1.72843	0.213735	1.26921	2.95703	0.14032	85	59	26	17	12	16	2	8	3	14	12	4	92.9953	40.3389	24.1499	12.464	8.95021	11.9504	5.0057	16.0521	2.25243	13.2335	34.7701	1.36489
9	83716742	83754442	1	ENSMUSG00000038379	Ttk	19.0734	1.94341	0.810253	1.16434	0.244285	1	protein coding	Ttk protein kinase	0.964703	1.50603	2.68798	1.95885	0.253895	0	0.16377	0.267168	1.62358	1.47212	0.045422	1.08235	39	51	76	57	1	0	1	3	34	31	1	25	27.3366	33.4036	50.6099	41.7989	4.21098	0	2.63506	3.71547	25.6213	22.9846	0.79978	15.7651
1	165616250	165704846	1	ENSMUSG00000005763	Cd247	8.90332	1.93842	0.879875	1.06654	0.286181	1	protein coding	CD247 antigen	0.658969	0.568877	1.10922	1.52407	0.123552	0.052354	0.365126	0	1.03341	0.632397	0	0.678146	15	11	18	24	2	1	4	0	11	7	0	10	15.403	10.408	17.2274	26.8261	1.69032	0.694332	4.84606	0	13.4521	8.14464	0	8.14782
9	69360902	69399077	1	ENSMUSG00000032231	Anxa2	184.495	1.93435	0.557784	1.67512	0.0939107	1	protein coding	annexin A2	20.3728	33.2704	22.2993	21.2401	13.4085	6.20295	3.16643	2.05549	12.7578	22.1354	5.72548	6.55679	403	547	287	296	164	60	28	19	124	218	61	80	383.444	490.14	278.87	301.037	147.71	66.2414	33.8397	18.9865	133.722	229.551	66.9595	63.4338
13	22220040	22220515	1	ENSMUSG00000062727	H2bc12	430.446	1.91843	0.555862	1.65227	0.0984801	1	protein coding	H2B clustered histone 12	170.733	262.344	287.403	315.496	31.1662	36.6879	43.8273	39.6173	156.272	245.639	85.3842	130.285	730	968	860	958	85	78	93	77	345	530	207	351	716.924	862.344	801.869	996.979	76.6171	87.528	103.988	82.1042	364.792	568.524	222.584	281.104
1	139382510	139421829	1	ENSMUSG00000033952	Aspm	185.297	1.91745	0.982234	0.93404	0.350283	1	protein coding	abnormal spindle microtubule assembly	1.85118	3.25818	5.04704	3.65356	0.195136	0.408163	0.441668	0	2.4409	3.7172	1.07466	1.72781	287	424	499	391	19	30	20	0	180	276	83	163	256.205	352.958	464.125	380.775	15.8072	32.0518	34.7089	0	188.133	283.463	92.4182	122.917
19	55730252	55922086	1	ENSMUSG00000024985	Tcf7l2	12.9169	1.91728	0.829607	1.10568	0.268863	1	protein coding	transcription factor 7 like 2, T cell specific, HMG box	1.57271	1.80488	0.925343	0.574839	0.206269	1.83857	0.857673	0.572102	0.144374	0.090201	0	0.35804	36	29	24	16	1	14	6	7	4	2	0	9	38.8239	34.8746	15.1779	10.6858	2.98032	25.752	12.022	6.93112	1.98479	1.22688	0	4.54319
2	168476358	168584329	-1	ENSMUSG00000027546	Atp9a	44.9661	1.91706	0.71324	1.28576	0.198526	1	protein coding	ATPase, class II, type 9A	4.21076	2.71068	1.71982	1.38967	0.091676	0.301592	0.549053	0.173657	0.826848	3.48567	0.906744	2.0034	182	103	65	50	3	7	11	4	22	44	18	32	173.209	87.2766	47.0057	43.0461	2.2072	7.03898	12.8241	3.50576	18.9414	79.0018	23.1763	42.36
6	69584259	69584812	-1	ENSMUSG00000096833	Igkv4-55	159.406	1.91528	0.837737	1.09256	0.274588	1	IG V gene	immunoglobulin kappa variable 4-55	48.2898	73.2373	332.423	157.089	16.9518	13.7296	8.33299	6.19392	38.8124	122.289	89.7187	127.645	137	181	660	318	31	20	12	8	57	177	146	231	135.642	161.217	620.482	332.913	27.9712	22.2463	13.3005	8.54487	60.4352	189.593	156.305	184.229
18	34757666	34766330	1	ENSMUSG00000003779	Kif20a	110.267	1.91292	0.763175	1.19621	0.231613	1	protein coding	kinesin family member 20A	4.04533	6.79955	9.94588	6.30767	0.844644	0.265068	0.523481	0.479939	4.4467	5.87737	2.87711	4.51716	153	197	227	176	25	7	11	10	111	150	75	112	168.71	221.961	275.606	198.093	20.6176	6.27225	12.3963	9.8232	103.276	135.055	74.5579	96.8347
2	25945547	26013232	-1	ENSMUSG00000026932	Nacc2	51.386	1.90976	0.975051	0.933042	0.350798	1	protein coding	nucleus accumbens associated 2, BEN and BTB (POZ) domain containing	3.04723	2.50453	1.26131	1.42522	0.731244	0.687364	0.31705	0.022857	0.905606	3.22675	0.018445	0.85837	212	183	72	92	14	9	15	1	22	43	1	25	176.218	113.366	48.4647	62.0639	24.7506	22.5534	10.4107	0.648688	29.1649	102.814	0.662801	25.5152
4	138181625	138187434	1	ENSMUSG00000046447	Camk2n1	18.1168	1.9072	0.758393	1.19622	0.231612	1	protein coding	calcium/calmodulin-dependent protein kinase II inhibitor 1	0.382746	1.49324	0.50203	0.374181	0.07028	0.092984	0.153865	0	0.345733	0.895675	0.268584	0.241583	26	86	24	18	3	3	5	0	12	30	10	10	25.0236	76.4148	21.8085	18.4219	2.68936	3.44928	5.71194	0	12.5879	32.2649	10.9111	8.11865
5	45827261	45857888	1	ENSMUSG00000015880	Ncapg	112.028	1.90575	1.07232	0.844668	0.398296	1	protein coding	non-SMC condensin I complex, subunit G	2.95901	8.46004	6.75111	5.14693	0.644412	0.044535	0.04422	0.136074	4.65868	5.48979	2.08293	4.20906	165	344	235	199	23	1	1	3	134	150	64	94	144.578	323.548	219.174	189.372	18.4288	1.23463	1.22682	3.26295	126.763	147.793	63.2383	105.711
5	123887779	123959656	1	ENSMUSG00000029414	Kntc1	74.4082	1.9033	1.1168	0.808827	0.418615	1	protein coding	kinetochore associated 1	1.21211	1.38303	4.57611	4.44166	0.132224	1.53028	0.019314	0	3.76991	1.19864	0.691014	1.04597	112	127	137	163	9	10	1	0	77	64	41	69	80.9889	72.331	203.16	223.481	5.17098	58.0142	0.732741	0	140.278	44.1278	28.6893	35.9237
5	4853391	5470312	-1	ENSMUSG00000028926	Cdk14	49.2943	1.89937	0.555253	1.61975	0.105287	1	protein coding	cyclin-dependent kinase 14	3.70582	6.50749	2.72118	1.84084	0.348054	2.71898	0.456255	1.37839	3.33011	1.51873	1.28137	0.724389	226	227	70	75	13	27	12	6	45	26	12	14	118.265	162.553	57.7017	44.2386	6.50127	49.2332	8.26771	21.5887	59.1842	26.7052	25.4095	11.8829
2	28582092	28589739	-1	ENSMUSG00000026809	Spaca9	6.83003	1.89831	0.861168	1.04313	0.29689	1	protein coding	sperm acrosome associated 9	3.48342	3.21337	2.72352	2.18736	3.85529	0	0	0.383301	1.00379	1.03158	0.730618	1.73089	22	16	14	9	19	0	0	1	3	3	3	3	19.8664	14.3445	10.3206	9.3939	12.8692	0	0	1.07284	3.18811	3.2416	2.58913	5.07411
7	127661812	127717663	1	ENSMUSG00000030786	Itgam	145.133	1.89193	0.479296	1.86091	0.0627574	1	protein coding	integrin alpha M	5.77526	7.66718	3.92096	3.46712	3.32675	2.18052	0.862202	0.731469	2.91289	4.49833	0.593818	1.26743	412	464	198	175	149	74	29	18	106	143	23	55	384.723	399.781	173.551	173.923	129.71	82.4169	32.613	23.914	108.063	165.108	24.391	43.3987
19	6135013	6141807	1	ENSMUSG00000024791	Cdca5	36.6509	1.89156	0.680698	1.30977	0.190274	1	protein coding	cell division cycle associated 5	1.89268	3.48489	4.40421	3.74068	0.218761	0.257198	0.286575	0.232903	0.941854	2.81471	2.87801	2.25139	55	86	90	77	4	3	4	3	14	40	46	40	52.2369	75.2834	80.7656	77.7432	3.53385	4.02762	4.491	3.15468	14.4763	42.8031	49.3562	31.9395
12	54225767	54250646	-1	ENSMUSG00000035105	Egln3	7.73237	1.88848	1.11718	0.795282	0.426449	1	protein coding	egl-9 family hypoxia-inducible factor 3	0.407051	0.38974	0.470146	0.754312	0	0.106877	0	0	0.348327	0.824503	0	0.291719	16	13	13	21	0	2	0	0	7	16	0	7	15.4075	11.547	11.8243	21.5004	0	2.29534	0	0	7.34253	17.1956	0	5.67579
5	124631143	124669454	-1	ENSMUSG00000029392	Rilpl1	27.0963	1.88815	0.727794	1.22034	0.222337	1	protein coding	Rab interacting lysosomal protein-like 1	2.96878	3.06436	1.95824	2.88203	1.69612	0	0.063769	0.690791	1.31663	1.9748	2.39581	0.551005	97	85	45	38	14	0	1	10	22	19	13	11	69.9508	56.5151	30.6576	51.1359	23.3909	0	0.85316	7.98804	17.2764	25.6376	35.0765	6.67341
3	159201070	159235592	1	ENSMUSG00000028175	Depdc1a	32.1593	1.88291	0.578091	1.52728	0.12669	1	protein coding	DEP domain containing 1a	0.827492	3.39645	2.95626	1.54993	0.728068	0.6578	0.565266	0	1.15455	0.7795	0.587706	1.99263	35	103	78	49	18	10	12	0	23	19	12	41	31.3565	100.74	74.2377	44.227	16.1478	13.6822	12.4004	0	24.3643	16.1052	13.838	38.8123
12	114487061	114487525	-1	ENSMUSG00000095700	Ighv10-3	98.9145	1.88152	0.449503	1.9611	0.0498673	1	IG V gene	immunoglobulin heavy variable V10-3	49.0949	175.79	58.9803	66.934	27.1379	15.4908	21.0333	29.7137	22.7771	92.8241	35.9002	25.0792	138	430	116	134	49	22	30	38	33	133	58	45	136.657	383.001	109.084	140.299	44.2128	24.4652	33.2437	40.591	34.9909	142.455	62.0928	35.8828
15	6552334	6692794	1	ENSMUSG00000022148	Fyb	31.9485	1.87643	0.58796	1.49063	0.13606	1	protein coding	FYN binding protein	5.37005	5.54517	3.94293	3.63555	0.61931	0.418559	4.64162	0.895756	3.0687	0.770774	1.36741	4.52107	105	96	87	59	13	3	11	13	13	15	6	19	85.9227	69.238	41.7924	43.6718	5.78237	3.78839	42.043	7.01276	27.2615	6.77466	13.554	36.5403
10	8080520	8394589	-1	ENSMUSG00000047712	Ust	8.17468	1.87278	0.774198	1.12733	0.259601	1	protein coding	uronyl-2-sulfotransferase	0.434373	0.295155	0.242489	0.356207	0.123431	0.341194	0.338767	0.040731	0.121442	0.03146	0	0.08866	28	15	11	14	5	9	9	1	4	1	0	3	25.0138	13.3038	9.27828	15.4466	4.16026	11.148	11.077	1.15113	3.89458	0.998193	0	2.62437
14	67989584	68170891	-1	ENSMUSG00000044447	Dock5	11.0685	1.86966	0.550771	1.57898	0.11434	1	protein coding	dedicator of cytokinesis 5	0.18601	0.120302	0.325761	0.368864	0.040573	0.138341	0.120056	0.095325	0.149202	0.051729	0.030368	0.167504	23	16	36	41	4	6	9	5	2	4	1	16	20.4497	10.3522	23.7962	30.5372	2.61074	8.62939	7.49444	5.14327	9.13482	3.13348	2.07448	9.46569
9	59587427	59626157	1	ENSMUSG00000074259	Gramd2	8.18308	1.8681	0.783481	1.10801	0.267859	1	protein coding	GRAM domain containing 2	0.727054	0.675211	0.202801	0.495237	0.171377	0.470551	0.119296	0	0.418864	0.216985	0.032527	0.365539	33	21	8	9	2	8	4	0	12	6	1	2	25.8751	18.809	4.79561	13.2722	3.56983	9.50174	2.41071	0	8.30165	4.25487	0.719304	6.68695
9	22243308	22300484	-1	ENSMUSG00000036777	Anln	41.177	1.86641	0.606983	1.4274	0.153466	1	protein coding	anillin, actin binding protein	0.720398	2.38518	1.29164	2.21282	0.092527	0.259719	0.157102	0.295043	1.14351	1.61359	0.621021	0.863477	50	67	64	109	4	8	5	9	41	56	24	37	45.0418	116.728	53.659	104.184	3.38603	9.21354	5.57737	9.05334	39.8162	55.5874	24.1268	27.7506
1	16758275	16779835	1	ENSMUSG00000025779	Ly96	17.9829	1.86157	0.55453	1.5537	0.120256	1	protein coding	lymphocyte antigen 96	8.48807	8.28674	4.23323	4.54495	3.93828	0.891818	0.60602	1.65804	2.29263	3.20688	2.303	5.97494	57	48	20	21	17	3	2	5	8	11	9	25	55.9729	42.7723	18.5481	22.5689	15.2004	3.33676	2.26914	5.36592	8.41936	11.6518	9.43652	20.2526
6	68993542	68994064	-1	ENSMUSG00000076540	Igkv4-80	62.9155	1.86022	0.62713	1.37168	0.170162	1	IG V gene	immunoglobulin kappa variable 4-80	125.526	40.4399	44.5226	22.1281	6.44447	9.79608	14.6259	7.28758	43.5944	61.733	37.4053	18.1152	302	85	75	38	10	12	18	8	55	76	52	28	300.281	75.7062	70.7673	39.861	9.02314	13.2961	19.8665	8.55572	58.3859	81.3677	55.6003	22.2748
18	34541542	34577169	1	ENSMUSG00000014503	Pkd2l2	28.6175	1.8596	0.570101	1.5078	0.131605	1	protein coding	polycystic kidney disease 2-like 2	2.39815	2.174	2.23458	3.07219	0.398944	0.21998	0.571002	0.175891	1.70636	1.78658	1.20011	1.89336	65	55	41	48	9	6	12	2	20	24	13	30	66.8441	47.4303	41.3849	64.4834	6.50845	3.47896	9.03712	2.40608	26.487	27.4378	20.7853	27.1268
8	10056467	10089072	1	ENSMUSG00000031497	Tnfsf13b	9.91725	1.85958	0.781328	1.10015	0.271265	1	protein coding	tumor necrosis factor (ligand) superfamily, member 13b	1.08767	1.45451	1.28105	0.540514	0.458991	0.316547	1.21639	0.06181	0.563051	0.589005	0.320239	0	19	21	14	6	5	11	16	2	3	4	5	0	23.5745	24.6758	18.4487	8.82189	5.82271	3.89279	14.97	0.657476	6.7962	7.03404	4.31288	0
2	18045487	18053862	-1	ENSMUSG00000054074	Skida1	13.116	1.84907	0.836443	1.01509	0.310063	1	protein coding	SKI/DACH domain containing 1	0.553577	0.775213	0.700427	0.613777	0.254723	0.188998	2.01747	0	0.367661	0.046357	0.081888	0.149977	37	39	25	19	7	6	5	0	9	1	3	4	22.6421	24.8181	19.0353	18.9043	6.09797	4.38606	46.8545	0	8.37452	1.0447	2.08118	3.15312
8	121305372	121316043	-1	ENSMUSG00000031821	Gins2	47.8768	1.84837	0.448981	1.88955	0.0588187	1	protein coding	GINS complex subunit 2 (Psf2 homolog)	1.01364	2.51484	4.48171	3.93886	0.349452	1.27992	1.14369	0.572915	1.57026	0.856359	0.801092	2.51231	60	84	86	55	13	34	32	15	20	25	26	47	41.8279	81.227	122.881	122.395	8.44007	29.9671	26.7975	11.6025	36.0851	19.4705	20.5406	53.2882
2	157958322	157988356	-1	ENSMUSG00000037820	Tgm2	16.0173	1.84386	0.700394	1.20484	0.228266	1	protein coding	transglutaminase 2, C polypeptide	1.70797	0.217112	0.418686	0.468001	0.322243	0.395057	0.038461	0.208103	0.756618	0.335947	0.201434	0.211388	54	10	16	18	11	9	1	5	21	9	6	7	84.4888	8.40645	13.7615	17.4332	9.32997	11.0881	1.08031	5.05217	20.8435	9.15653	6.19158	5.37499
5	66237552	66241809	-1	ENSMUSG00000107390	Gm43323	34.624	1.84273	0.490422	1.71838	0.0857269	1	TEC	predicted gene 43323	1.13947	1.72529	0.809588	1.65254	0.710594	0.713149	0.032184	0.27855	0.637775	0.843124	0.393268	0.656936	74	95	37	76	29	22	1	8	21	27	14	26	71.2278	84.4151	33.6256	77.7879	25.9985	25.2934	1.14234	8.54537	22.0302	29.0389	15.2752	21.1081
3	95583511	95595228	-1	ENSMUSG00000015850	Adamtsl4	9.99855	1.84017	0.835327	1.0058	0.314513	1	protein coding	ADAMTS-like 4	0.537663	0.192146	0.779022	0.386303	0.054411	0.467756	0	0.038655	0.40151	0.381342	0.062365	0.084145	33	10	11	16	2	13	0	1	12	11	2	3	27.7045	7.74965	26.6716	14.9893	1.64098	13.6754	0	0.977518	11.5216	10.8267	1.99678	2.22867
11	46215977	46280342	-1	ENSMUSG00000020395	Itk	19.2171	1.8354	0.455992	1.83206	0.0669428	1	protein coding	IL2 inducible T cell kinase	0.616228	0.706532	0.611149	1.42908	0.244429	0.295336	0.259341	0.555181	0.601221	0.1246	0.19615	0.403274	37	39	28	46	10	6	5	16	20	4	7	16	34.538	30.9954	22.7594	60.3151	8.01837	9.39186	8.25339	15.2711	18.7657	3.84781	6.83115	11.6181
13	64396514	64419666	1	ENSMUSG00000097101	1810034E14Rik	39.9268	1.83497	0.43853	1.90402	0.0569075	1	lncRNA	RIKEN cDNA 1810034E14 gene	7.82042	6.83825	13.2155	4.29245	3.69503	4.62728	5.37379	2.12806	3.96609	3.07278	1.629	1.05384	101	73	81	27	24	16	45	8	27	27	21	13	94.7973	64.8815	106.441	39.1817	26.2157	31.8253	36.9872	12.6598	26.7734	20.5229	12.2697	6.56626
17	35244935	35246992	-1	ENSMUSG00000036185	Sapcd1	9.64537	1.82958	0.910666	0.91096	0.362316	1	protein coding	suppressor APC domain containing 1	2.23293	0.897949	4.29259	5.58681	0.485716	0.537518	1.25235	1.37124	0.467578	0	5.48823	0.280297	15	5	22	28	2	3	4	4	2	0	20	2	16.3751	5.15433	20.9164	30.8522	2.08483	2.23657	5.21485	4.93519	1.90959	0	25.0087	1.05659
6	69741507	69742006	-1	ENSMUSG00000076564	Igkv12-46	878.76	1.82881	0.675265	1.22738	0.219679	1	IG V gene	immunoglobulin kappa variable 12-46	1150.89	447.243	857.248	469.037	126.274	95.0572	159.853	157.952	473.344	1073.41	219.115	150.475	3235	1094	1686	939	228	135	228	202	692	1537	354	270	3203.51	974.426	1585.47	983.14	205.725	150.127	252.652	215.773	733.748	1646.27	378.98	215.297
17	80336916	80369763	-1	ENSMUSG00000024095	Hnrnpll	13.2284	1.82866	0.818116	1.01289	0.311113	1	protein coding	heterogeneous nuclear ribonucleoprotein L-like	1.15644	0.618001	0.663222	0.566286	0	0.232767	0.758196	0.087382	0.599873	0.67004	0.162468	0.036389	52	22	19	18	0	4	14	2	11	17	3	1	46.6439	19.5106	17.7741	17.1996	0	5.32689	17.3643	1.72973	13.4743	14.8906	4.07183	0.754422
6	37783021	37783485	1	ENSMUSG00000080242	Atp6v0c-ps2	7.26635	1.82345	0.790016	1.04232	0.297266	1	processed pseudogene	ATPase, H+ transporting, lysosomal V0 subunit C, pseudogene 2	5.36128	3.77902	4.32912	3.92904	1.15868	4.89681	0	0	0.954069	3.51678	1.34255	2.13976	22	13	12	11	3	10	0	0	2	7	3	6	21.5644	11.5509	11.1702	11.4245	2.69739	11.1838	0	0	2.10982	7.48798	3.21619	4.79097
14	101679796	101846627	-1	ENSMUSG00000033083	Tbc1d4	17.3685	1.82206	0.629251	1.30642	0.191411	1	protein coding	TBC1 domain family, member 4	0.332386	0.779892	1.25185	0.728703	0.039632	0.758813	0.130877	0.092737	0.641308	0.361026	0.145096	0.198852	32	54	29	37	1	18	3	2	15	13	8	8	19.004	34.9018	47.5571	31.3737	1.32625	24.616	4.24888	2.60219	20.4195	11.3732	5.15475	5.844
5	137285781	137292728	1	ENSMUSG00000023328	Ache	7.65977	1.82177	0.887578	0.925852	0.354523	1	protein coding	acetylcholinesterase	0.553068	0.501192	0.574205	0.479136	0.085584	1.23333	0.074914	0.165567	0.248282	0.319646	0.032695	0	18	14	11	12	3	6	2	2	4	5	1	0	17.5537	12.451	12.1092	11.4515	1.58986	22.21	1.35008	2.57895	4.38843	5.58984	0.644799	0
13	33149192	33163050	1	ENSMUSG00000042842	Serpinb6b	53.7821	1.81455	0.431744	1.88664	0.0592085	1	protein coding	serine (or cysteine) peptidase inhibitor, clade B, member 6b	3.93406	5.52331	5.37418	6.63971	2.65163	0.795632	1.37675	0.559784	1.84614	4.10535	2.01021	4.28192	125	149	113	135	52	10	16	6	30	14	31	65	95.3497	104.782	86.5464	121.182	37.6158	10.9413	18.9469	6.65854	24.9183	54.8239	30.2739	53.3453
2	25465428	25471769	-1	ENSMUSG00000029419	Ajm1	12.2334	1.80917	0.834259	0.96993	0.332081	1	protein coding	apical junction component 1	0.488193	0.431322	0.683701	0.494302	0.219219	2.24463	0.296101	0.061259	0.134815	0.093089	0.049427	0.111145	22	27	27	16	6	4	7	2	3	2	2	5	20.6737	14.2968	19.2376	15.7627	5.43355	53.9325	7.11988	1.27315	3.17936	2.17202	1.30059	2.41932
13	23947649	23948389	1	ENSMUSG00000049539	H1f1	451.164	1.8063	0.697594	1.15583	0.24775	1	protein coding	H1.1 linker histone, cluster member	91.7753	155.162	142.722	147.251	14.9526	13.634	12.3445	17.6987	94.3492	153.813	46.8303	79.7267	776	1122	846	883	80	56	51	67	410	649	221	418	754.552	998.523	779.675	911.661	71.9546	63.6014	57.6292	71.4142	431.994	696.783	239.243	336.935
19	3634828	3736564	-1	ENSMUSG00000024913	Lrp5	7.18129	1.80533	0.773771	1.04078	0.297978	1	protein coding	low density lipoprotein receptor-related protein 5	0.176218	0.495562	0.13914	0.257679	0.040067	0.09078	0.066071	0.437386	0.185919	0	0.057676	0.111968	14	26	4	12	2	6	2	8	4	0	2	6	11.0469	24.3163	5.7956	12.1641	1.47013	3.22893	2.35184	13.4565	6.49066	0	2.24661	3.60797
3	36619014	36626299	-1	ENSMUSG00000027715	Ccna2	115.467	1.8031	0.84535	0.950021	0.342102	1	protein coding	cyclin A2	5.31987	12.1334	9.10612	12.6251	0.324053	1.21613	0.217679	1.30432	6.50915	9.54607	6.261	5.68343	235	340	283	289	9	12	3	6	111	198	75	112	154.487	275.793	175.704	276.08	5.50788	20.0378	3.58931	18.5889	105.266	152.741	112.975	84.8356
2	104661086	104680221	-1	ENSMUSG00000027171	Prrg4	46.2595	1.80154	0.414209	1.9351	0.0529777	1	protein coding	proline rich Gla (G-carboxyglutamic acid) 4 (transmembrane)	4.31716	3.65381	2.71834	2.90942	0.518835	1.5396	1.55089	0.529288	2.50084	1.99374	1.30886	1.5816	142	81	47	74	10	20	24	10	44	42	22	37	136.094	90.1564	56.9382	69.0652	9.57301	27.5378	27.7605	8.18866	43.9038	34.6299	25.638	25.6281
2	118943274	118977926	1	ENSMUSG00000027323	Rad51	72.2931	1.80122	0.816708	0.981042	0.326572	1	protein coding	RAD51 recombinase	4.33963	9.31511	8.66163	5.42289	0.195669	1.49897	2.27653	0.724467	2.75635	8.51782	0.369859	6.52881	85	162	119	114	6	24	19	15	42	84	9	60	111.064	186.603	147.292	104.511	2.93103	21.7666	33.0825	9.0995	39.2852	120.113	5.88173	85.8879
17	53981814	53996361	-1	ENSMUSG00000023940	Sgo1	36.6455	1.7997	0.577767	1.38412	0.166322	1	protein coding	shugoshin 1	0.91202	1.93572	2.79962	1.46811	0.174123	0.115125	0.495329	0.206157	1.6937	1.07237	0.764949	1.07698	50	90	108	57	6	3	13	5	37	29	23	36	47.1526	78.3346	96.1741	57.1575	5.26909	3.37716	14.5412	5.23093	48.7656	30.5483	24.5744	28.6211
2	163568504	163592159	-1	ENSMUSG00000017697	Ada	62.4477	1.79893	0.633323	1.26149	0.207134	1	protein coding	adenosine deaminase	9.59331	5.8186	3.78726	5.54777	0.604156	1.14976	0.614893	0.476253	5.61565	6.57834	2.53204	4.00375	227	117	63	93	9	13	7	5	68	77	33	58	219.083	104.009	57.4677	95.4051	8.07547	14.8979	7.97343	5.33774	71.4194	82.7748	35.9302	46.9987
11	71932858	71938196	1	ENSMUSG00000020808	Pimreg	7.65507	1.79591	1.07059	0.743433	0.45722	1	protein coding	PICALM interacting mitotic regulator	1.09795	1.69927	0.477639	0.812273	0.076149	0.40096	0	0	2.16163	0.764573	0.086984	0.07826	14	23	7	12	1	4	0	0	16	5	1	1	18.8575	22.8441	5.45079	10.5055	0.765493	3.90735	0	0	20.6756	7.23538	0.928303	0.690909
9	118307280	118315200	1	ENSMUSG00000032446	Eomes	9.32474	1.79582	0.793941	1.00237	0.316164	1	protein coding	eomesodermin	0.725837	0.580785	0.264497	0.316131	0	0.098585	0.146836	0.105977	0.19844	0.264098	0.683677	0.122089	39	26	10	6	0	2	3	2	5	7	16	4	32.1131	20.1126	7.77539	10.5323	0	2.47476	3.68876	2.3011	4.88934	6.43798	18.7951	2.7765
6	68402559	68403056	1	ENSMUSG00000076522	Igkv16-104	487.979	1.79495	0.417346	1.90477	0.0568105	1	IG V gene	immunoglobulin kappa variable 16-104	488.492	174.926	403.701	577.059	120.693	106.513	110.243	94.9227	183.093	287.719	173.692	304.488	1380	430	798	1161	219	152	158	122	269	414	282	549	1366.44	382.999	750.329	1215.53	197.603	169.05	175.101	130.312	285.22	443.449	301.901	437.807
4	124812258	124833104	-1	ENSMUSG00000028873	Cdca8	76.1089	1.79158	0.625458	1.26561	0.205654	1	protein coding	cell division cycle associated 8	6.86793	13.8994	14.5941	21.5522	1.82626	2.55716	0.614545	1.0998	11.666	15.2763	5.26882	7.02824	94	176	170	197	12	19	5	6	79	108	26	78	91.0611	144.249	128.571	215.184	14.1725	19.2373	4.62664	7.15649	86.1399	111.6	43.408	47.8996
11	94935300	94967627	-1	ENSMUSG00000001507	Itga3	26.6884	1.78963	0.615733	1.28242	0.199695	1	protein coding	integrin alpha 3	2.93982	0.465082	0.852413	0.923478	0.554476	0.761973	0.261369	0.127388	0.799265	1.08311	0.334034	0.81895	60	28	16	12	26	27	9	4	29	19	13	13	130.696	16.1838	25.1796	30.9157	14.4278	19.2203	6.5978	2.77938	19.7882	26.5309	9.22741	18.7144
14	67913780	67953290	-1	ENSMUSG00000048922	Cdca2	113.422	1.78734	0.465401	1.69174	0.0906962	1	protein coding	cell division cycle associated 2	6.36347	7.51633	5.4897	8.98823	1.67271	1.55544	0.465377	2.42548	7.13005	4.86341	2.73776	2.84576	207	231	225	228	24	26	12	32	109	134	73	97	241.976	223.715	138.703	257.375	37.2287	33.5593	10.0482	45.2644	150.99	101.897	64.6879	55.6231
6	4076899	4086972	-1	ENSMUSG00000032757	Bet1	136.811	1.78696	0.485946	1.61943	0.105355	1	protein coding	Bet1 golgi vesicular membrane trafficking protein	27.7565	37.4557	18.8414	12.6117	9.36604	14.3913	5.77053	2.91639	16.2736	7.49936	3.2166	24.9169	310	244	160	126	90	56	62	34	71	86	46	108	363.252	383.682	163.839	124.288	71.7429	106.862	42.881	18.7314	118.605	54.0766	26.1571	167.616
1	160806155	160833433	1	ENSMUSG00000026715	Serpinc1	27.838	1.78488	0.455184	1.7243	0.0846528	1	protein coding	serine (or cysteine) peptidase inhibitor, clade C (antithrombin), member 1	2.13249	3.36299	1.84809	1.2669	0.667739	0.793357	1.07371	2.20821	0.855791	0.281352	0.696983	0.743037	32	18	31	20	18	21	21	30	22	7	19	25	65.1891	80.4679	37.5379	29.1637	11.9474	13.7606	18.6372	33.1291	14.5691	4.73893	13.2391	11.6755
2	175968362	175982121	1	ENSMUSG00000078894	2210418O10Rik	42.6937	1.78391	0.577272	1.35796	0.174475	1	protein coding	RIKEN cDNA 2210418O10 gene	4.15462	0.5211	5.62507	1.95817	1.73767	1.24669	0.757058	0.351069	1.80628	1.43434	0.817067	5.59063	123	15	82	64	63	34	21	9	38	41	26	2	127.385	12.5726	114.588	45.1952	31.0279	21.4686	13.1754	5.28083	30.8312	24.2227	15.5813	70.9952
16	72105194	72842983	1	ENSMUSG00000022883	Robo1	21.0342	1.7804	0.652602	1.19583	0.231762	1	protein coding	roundabout guidance receptor 1	1.50903	0.536525	0.451632	0.192745	0.31974	0.262829	0.281771	0.661559	0.614565	0.257938	0.07121	0.116226	115	32	24	14	14	7	5	11	20	15	4	5	100.672	28.0164	20.0196	9.68296	12.485	9.94868	10.6737	21.6601	22.8326	9.48132	2.95189	3.98558
18	21077682	21116919	1	ENSMUSG00000033107	Rnf125	21.8137	1.77929	0.586123	1.32956	0.183662	1	protein coding	ring finger protein 125	3.37301	3.60488	1.95535	2.08593	0.414823	0.229321	0.867315	0.588289	2.49205	2.75738	1.27944	0.852281	63	58	26	28	5	2	8	5	24	26	13	10	61.4902	51.4386	23.6848	28.6352	4.42618	2.37199	8.9778	5.2633	25.3	27.6966	14.493	7.98636
4	44300876	44364675	1	ENSMUSG00000035683	Melk	27.2305	1.77902	0.825617	0.943557	0.345396	1	protein coding	maternal embryonic leucine zipper kinase	1.54499	1.6336	2.22833	1.57193	0.108411	0.047753	0.76772	0	1.64454	1.80914	0.165577	1.30323	68	61	69	49	3	1	6	0	37	28	4	35	58.0295	48.0266	55.6113	44.46	2.3833	1.01767	16.3732	0	34.3989	37.4401	3.86432	25.1608
12	116369022	116427351	1	ENSMUSG00000042029	Ncapg2	255.589	1.7769	0.766505	1.01357	0.31079	1	protein coding	non-SMC condensin II complex, subunit G2	9.38118	15.1855	18.024	25.4989	1.81898	2.0726	0.652574	3.67226	21.9085	11.9313	3.30779	10.5912	451	455	444	434	48	60	20	40	228	245	105	229	346.108	438.525	441.839	708.414	39.2791	43.3861	13.6706	66.4917	450.135	242.54	75.8302	200.852
9	84306037	84306834	1	ENSMUSG00000099927	Gm8226	57.4491	1.77308	2.06629	0.37414	0.7083	1	processed pseudogene	predicted gene 8226	12.3444	16.4413	18.3019	13.817	0	16.8019	15.9168	0	0	17.1916	0	0	116	132	120	92	0	76	73	0	0	80	0	0	112.511	117.288	110.273	94.7565	0	86.3093	82.4702	0	0	85.7814	0	0
2	127643036	127673785	-1	ENSMUSG00000027379	Bub1	42.4198	1.76995	1.1076	0.695157	0.486957	1	protein coding	BUB1, mitotic checkpoint serine/threonine kinase	1.89502	2.77021	2.84252	2.41285	0.154458	0.503889	0	0	1.40577	3.98111	0.814166	1.40101	77	121	103	88	5	5	0	0	37	50	23	44	78.1226	89.3894	77.8617	74.9041	3.72694	11.7863	0	0	32.274	90.429	20.8557	29.6881
13	22017196	22017677	-1	ENSMUSG00000094777	H2ac24	1031.84	1.76672	0.398738	1.92286	0.0544976	1	protein coding	H2A clustered histone 24	407.314	539.716	696.14	700.444	149.816	107.578	131.344	165.95	386.179	460.478	207.926	323.925	1778	2032	2127	2173	417	233	286	327	872	1014	515	891	1745.43	1810.14	1982.48	2260.63	375.883	261.578	319.912	348.645	921.93	1087.74	553.906	713.757
19	4185422	4194032	-1	ENSMUSG00000024842	Cabp4	7.7918	1.7643	0.883079	0.86549	0.38677	1	protein coding	calcium binding protein 4	0.506852	0.791188	1.32088	0.360657	0.158148	1.21963	0	0.112306	0	0.412838	0.230567	0.366566	15	15	19	5	4	12	0	2	0	4	3	9	12.8984	15.7596	22.3345	6.91133	2.35558	17.6101	0	1.40261	0	5.78864	3.64588	4.79497
4	117016836	117039836	-1	ENSMUSG00000028678	Kif2c	41.3914	1.76132	1.12133	0.678943	0.497174	1	protein coding	kinesin family member 2C	1.66631	2.98041	2.89691	3.21211	0	0.42287	0	0.194922	3.19857	2.54456	0.73384	1.82502	49	100	86	96	0	7	0	3	69	53	17	47	62.4369	87.4122	72.1239	90.6335	0	8.99028	0	3.58448	66.7449	52.534	17.0859	35.1506
1	62742444	62857854	1	ENSMUSG00000025969	Nrp2	311.829	1.75795	0.512358	1.47934	0.13905	1	protein coding	neuropilin 2	11.757	7.66517	6.22172	6.20009	5.16943	1.76938	2.01698	1.62882	9.10915	3.20573	2.25725	2.89309	1068	605	409	400	295	80	83	67	414	141	120	169	1040.97	531.217	366.023	413.381	267.893	88.8874	101.402	70.7773	449.152	156.39	124.185	131.668
1	189372803	189420283	-1	ENSMUSG00000026605	Cenpf	283.029	1.75609	0.745855	1.01372	0.310715	1	protein coding	centromere protein F	3.302	6.6051	6.21493	9.9105	0.454043	0.928048	0.29986	1.01676	3.82466	6.29752	2.58496	6.18512	492	692	666	771	28	38	8	29	270	423	248	408	351.435	550.247	439.504	794.284	28.2842	56.0426	18.1214	53.109	226.692	369.3	170.951	338.372
11	77923106	77928692	1	ENSMUSG00000020834	Dhrs13	6.48288	1.74887	0.751209	0.996887	0.318819	1	protein coding	dehydrogenase/reductase (SDR family) member 13	0.875657	0.70272	0.452899	0.61675	0.075974	0.300034	0.099339	0.323306	0.311157	0.773303	0	0.52033	22	15	8	11	1	3	1	3	4	8	0	8	19.5321	12.269	6.71237	10.3595	0.991874	3.79723	1.25818	3.53924	3.86519	9.50401	0	5.96586
17	47451801	47672883	1	ENSMUSG00000064043	Trerf1	62.1278	1.74755	0.645201	1.15863	0.246609	1	protein coding	transcriptional regulating factor 1	2.34189	2.92487	2.64923	1.54354	0.639385	0.12456	0.23727	0.299566	1.63895	3.47044	0.378304	1.35883	172	157	120	84	28	4	6	7	59	107	12	54	145.026	141.774	109.008	71.9797	23.175	4.37664	8.3431	9.10441	56.5223	118.414	14.5569	43.2537
2	118428692	118472072	1	ENSMUSG00000040084	Bub1b	206.195	1.74728	0.795819	0.939007	0.347727	1	protein coding	BUB1B, mitotic checkpoint serine/threonine kinase	7.19362	9.73509	12.5316	17.4881	1.47201	0.64485	1.5065	0.652076	13.6864	11.536	4.73395	4.58344	399	381	450	393	25	17	40	16	172	226	144	155	306.953	325.144	355.295	561.926	36.7633	15.6122	36.5006	13.6554	325.231	271.22	125.516	100.53
9	92131803	92154331	1	ENSMUSG00000032369	Plscr1	79.0743	1.74383	0.475362	1.56477	0.117636	1	protein coding	phospholipid scramblase 1	5.48263	10.9023	5.13163	3.87434	3.33145	3.61698	1.80264	0.53865	3.38311	5.76625	1.16373	2.05068	167	248	121	92	66	54	29	8	58	80	12	42	160.214	249.368	99.6379	85.2553	56.98	59.9704	29.9105	7.72498	55.0558	92.8423	21.1306	30.8026
2	152689884	152737241	1	ENSMUSG00000027469	Tpx2	199.694	1.74244	0.873722	0.84975	0.395464	1	protein coding	TPX2, microtubule-associated	8.05551	10.6533	11.3654	12.3642	0.606128	0.380861	0.329727	1.74287	10.1525	11.5842	5.05748	6.02189	323	486	431	399	20	10	10	25	178	306	127	154	363.231	375.998	340.512	419.825	15.9967	9.74397	8.44206	38.5685	254.94	287.804	141.701	139.573
12	115083368	115083839	-1	ENSMUSG00000094198	Ighv1-50	157.144	1.74233	0.386853	1.9189	0.0549969	1	IG V gene	immunoglobulin heavy variable 1-50	121.462	145.297	171.091	65.5216	28.6118	21.0147	38.808	51.7315	104.91	30.5038	80.4995	72.3742	364	378	359	140	55	32	59	70	163	46	138	138	360.01	336.66	337.135	146.443	49.6167	35.6402	65.4793	74.7466	172.787	49.2834	147.82	110.102
14	21102642	21498637	1	ENSMUSG00000039197	Adk	165.99	1.742	0.395932	1.87407	0.0609213	1	protein coding	adenosine kinase	30.4532	22.2874	27.6476	22.5623	7.68863	8.2592	4.46988	7.49993	14.7582	29.9895	5.78878	12.6413	530	310	254	198	77	77	30	66	146	134	70	95	454.372	260.284	274.091	253.498	67.1437	69.9192	37.8686	54.9181	122.627	246.541	53.6679	96.9499
13	23930717	23931224	1	ENSMUSG00000075031	H2bc3	518.404	1.74076	0.545615	1.35766	0.174573	1	protein coding	H2B clustered histone 3	167.137	262.818	296.137	349.754	43.1601	43.3522	35.2485	48.3012	185.678	252.203	122.53	168.593	797	1079	988	1184	131	102	83	104	457	605	330	505	781.167	961.067	919.468	1230.3	118.053	114.72	92.9827	110.855	482.896	649.151	355.284	404.905
12	115586781	115587215	-1	ENSMUSG00000094502	Ighv1-69	222.794	1.74049	0.427209	1.73331	0.0830405	1	IG V gene	immunoglobulin heavy variable 1-69	332.463	265.543	117.166	93.4928	56.6889	61.5955	73.3005	46.8596	76.3607	175.871	72.8844	183.587	813	567	200	163	89	77	92	52	97	220	103	288	808.023	505.036	188.994	170.876	80.2855	85.3171	101.544	55.5855	102.94	235.489	110.099	229.342
2	35203998	35226988	-1	ENSMUSG00000026880	Stom	70.6451	1.73967	0.494215	1.49665	0.134485	1	protein coding	stomatin	9.25906	5.74355	6.34544	4.29922	2.57907	2.10155	0.907532	2.0809	4.92018	5.17157	0.529034	4.92621	267	151	155	92	67	17	10	13	73	52	12	54	231.561	112.432	105.443	80.9659	37.7521	29.8207	12.8874	25.5406	68.5261	71.2628	8.22114	63.3273
11	5004132	5015327	-1	ENSMUSG00000034201	Gas2l1	12.8142	1.73922	0.686436	1.07689	0.281529	1	protein coding	growth arrest-specific 2 like 1	1.64788	0.58489	1.48073	0.607469	0.088538	0.676297	0.116241	1.20625	0.181488	0.578537	0.751529	0.554683	35	12	17	16	3	16	3	7	5	11	7	3	43.5953	12.1115	26.0285	12.1018	1.37095	10.1515	1.74613	15.6614	2.67384	8.43306	12.354	7.54287
2	122424948	122441784	-1	ENSMUSG00000027199	Gatm	21.911	1.73896	0.796933	0.927253	0.353795	1	protein coding	glycine amidinotransferase (L-arginine:glycine amidinotransferase)	2.02941	2.90125	2.37415	0.80856	0.624361	0.843401	0	0	1.94415	2.06989	0.781731	0.60946	49	86	52	20	11	2	0	0	32	33	15	13	51.5411	57.6739	40.0637	15.4635	9.28108	12.1534	0	0	27.4973	28.965	12.3365	7.95623
2	27566452	27652969	1	ENSMUSG00000015846	Rxra	15.7888	1.73439	0.550556	1.3339	0.182237	1	protein coding	retinoid X receptor alpha	0.411495	0.735948	1.7019	0.56235	0.295765	0.223658	0.04331	1.0042	0.545607	0.462465	0.310815	0.209599	31	47	23	30	14	8	1	3	21	11	6	7	18.4802	25.8701	50.7849	19.0178	7.7744	5.69908	1.10443	22.133	13.6457	11.4435	8.67347	4.83848
13	23719592	23720121	1	ENSMUSG00000099517	H3c8	88.6674	1.7331	1.54231	0.475328	0.634553	1	protein coding	H3 clustered histone 8	30.478	46.6311	50.226	43.8683	1.33773	0	0	0	45.0389	66.7399	15.8343	15.1853	156	205	180	159	4	0	0	0	119	171	46	49	151.945	181.67	166.469	164.249	3.58606	0	0	0	125.064	182.59	49.3179	39.1181
10	127374030	127457017	-1	ENSMUSG00000040249	Lrp1	40.6715	1.73241	1.14041	0.642237	0.52072	1	protein coding	low density lipoprotein receptor-related protein 1	0.43278	0.41073	0.668953	0.719099	0.114868	1.68537	0.19999	0.038429	0.041545	0.060311	0	0.062779	102	82	111	120	17	13	9	4	5	7	0	9	70.7659	52.5682	72.6795	88.5439	10.9934	156.362	18.5682	3.08388	3.78311	5.43366	0	5.27656
2	170188911	170269765	-1	ENSMUSG00000013523	Bcas1	7.48446	1.73224	0.822811	0.889921	0.373508	1	protein coding	brain enriched myelin associated protein 1	1.48991	0.966177	1.66101	0.481692	0.394452	0.25606	0.710837	0.174828	0.947593	0.18836	1.44459	0.050762	6	6	5	11	8	5	11	1	5	3	5	1	21.8174	11.0742	16.1613	5.31162	3.38079	2.12748	5.91045	1.25642	7.72758	1.51976	13.1444	0.382084
7	19512806	19530734	-1	ENSMUSG00000040525	Cblc	12.2096	1.73109	0.51478	1.4202	0.155549	1	protein coding	Casitas B-lineage lymphoma c	2.5679	3.08026	2.0195	2.00118	0.546648	0.772727	0.30712	1.4645	0.861696	1.65598	1.54904	1.72266	35	35	33	20	8	5	2	5	3	7	6	11	29.5794	27.7721	15.4566	17.3584	3.68551	5.0503	2.00874	8.27906	5.52765	10.5101	11.0873	10.1997
16	89583999	89940657	-1	ENSMUSG00000002489	Tiam1	16.35	1.7292	0.772094	0.944441	0.344945	1	protein coding	T cell lymphoma invasion and metastasis 1	1.45289	0.670449	0.276385	0.868026	0	0.718872	0.39648	0.703307	0.069252	0.550642	0.493587	0.174323	13	44	22	33	0	14	13	3	4	11	7	12	62.9069	22.7219	7.95134	28.3017	0	17.6604	9.74754	14.9449	1.66985	13.1365	13.2795	3.87973
11	102239650	102257029	-1	ENSMUSG00000006574	Slc4a1	15.0681	1.72872	0.976005	0.746638	0.455282	1	protein coding	solute carrier family 4 (anion exchanger), member 1	0.359441	1.0684	0.408594	0.284243	0	0.151371	0.090172	0	0.196977	0.641534	0.655838	0.023596	25	63	20	14	0	5	3	0	7	22	25	1	24.0614	55.9805	18.1737	14.3283	0	5.7493	3.42744	0	7.34318	23.6621	27.2797	0.811921
4	115951461	115980887	-1	ENSMUSG00000028702	Rad54l	54.5406	1.72804	0.444572	1.63762	0.101502	1	protein coding	RAD54 like (S. cerevisiae)	1.24245	3.14767	3.58999	3.44594	0.648395	1.03111	0.651941	0.463779	2.20623	1.9671	0.487521	2.05467	60	135	123	116	18	25	12	10	55	46	18	62	58.4158	115.838	112.151	122.003	17.843	27.5065	17.4046	10.7014	57.7667	50.9587	14.2427	49.656
2	28590176	28703177	1	ENSMUSG00000026807	Ak8	11.7979	1.72705	0.820536	0.886072	0.375579	1	protein coding	adenylate kinase 8	0.966906	1.7029	2.03371	2.31888	0.877403	1.44416	0	1.22466	1.1694	1.1937	0.083539	0	21	18	25	27	12	15	0	5	13	7	1	0	15.7487	21.71	22.0094	28.4415	8.36448	13.3462	0	9.78945	10.6072	10.7127	0.845469	0
12	77282839	77285437	-1	ENSMUSG00000112150	9530018F02Rik	9.18439	1.71989	0.69504	1.03575	0.300317	1	lncRNA	RIKEN cDNA 9530018F02 gene	0.835615	0.553869	0.296974	0.516158	0.166094	0.65811	0.108917	0.412792	0.306444	0.211556	0	0.213852	32	18	8	14	4	12	2	7	6	4	0	5	30.8285	15.9942	7.27985	14.3397	3.58657	13.7761	2.28163	7.47407	6.29612	4.30043	0	4.05544
9	119730682	119898945	-1	ENSMUSG00000052336	Cx3cr1	10.1173	1.71919	0.734375	0.979322	0.327421	1	protein coding	chemokine (C-X3-C motif) receptor 1	0.35985	0.622477	0.541544	0.273313	0	0.293658	0.243373	0.159111	0.378755	0.321071	0	0.173498	17	30	18	11	0	9	8	4	11	9	0	5	19.2238	26.0286	19.2225	10.9949	0	8.90097	7.38234	4.17155	11.2681	9.4506	0	4.76421
19	11752482	11796767	-1	ENSMUSG00000041488	Stx3	11.741	1.71795	0.738011	0.972825	0.33064	1	protein coding	syntaxin 3	0.599746	0.678569	0.701298	1.94671	0.343377	0.413005	1.35692	1.04131	0.164893	0.243005	0.102311	0.046018	25	24	21	14	9	7	9	5	3	5	2	1	16.5928	14.6945	12.8918	40.5568	5.56033	6.48315	21.3162	14.1387	2.54056	3.70431	1.75883	0.65442
16	18599197	18630737	-1	ENSMUSG00000000028	Cdc45	52.55	1.70972	0.387107	1.83341	0.066742	1	protein coding	cell division cycle 45	2.97303	4.77445	6.0925	6.80526	1.5108	0.932746	1.7417	0.841441	4.0473	3.33621	2.40951	2.21886	90	124	128	143	21	6	13	10	60	50	40	42	73.7293	92.6773	100.391	127.086	21.9294	13.1245	24.5255	10.241	55.8961	45.5863	37.1294	28.2845
4	118290098	118294549	-1	ENSMUSG00000006398	Cdc20	76.2564	1.70947	0.461584	1.53704	0.124283	1	protein coding	cell division cycle 20	5.64128	7.33653	10.8905	7.96322	1.37883	2.02245	1.23067	1.24521	6.01386	7.68967	4.08458	3.28787	143	158	139	143	22	20	15	14	78	81	57	51	130.047	132.38	166.812	138.237	18.6042	26.4533	16.1091	14.0879	77.2061	97.6723	58.5085	38.9597
13	23754691	23755394	-1	ENSMUSG00000069272	H2ac8	171.979	1.6985	0.651458	1.07221	0.283628	1	protein coding	H2A clustered histone 8	42.4007	63.3492	50.1299	55.4749	15.4129	9.94802	10.6013	1.9262	47.7127	48.2847	13.0214	38.4033	333	426	276	309	77	38	41	7	193	190	57	188	324.065	379.146	254.638	319.248	69.2739	43.1138	46.2863	7.46062	203.423	203.973	61.6697	151.451
12	24880878	25014396	1	ENSMUSG00000020646	Mboat2	8.71367	1.69736	0.7977	0.874216	0.382001	1	protein coding	membrane bound O-acyltransferase domain containing 2	0.481166	0.442234	0.372926	0.082294	0.060275	0.079812	0.198088	0.312029	0	0.445208	0.192903	0.062192	26	13	9	2	4	4	10	7	0	10	4	4	26.7566	19.2486	13.779	3.446	1.9618	2.51817	6.25461	8.51551	0	13.6408	6.66538	1.77765
2	162896607	162926608	1	ENSMUSG00000017861	Mybl2	82.5492	1.69318	0.49594	1.39772	0.162198	1	protein coding	myeloblastosis oncogene-like 2	2.16229	4.92636	8.59565	12.4161	2.10854	0.680487	0.700739	3.31122	4.62433	3.52119	4.22334	4.41931	112	144	164	152	57	18	11	15	88	96	35	73	62.7383	111.917	165.713	271.278	35.8079	11.2958	11.5446	47.1505	74.7211	56.3725	76.1419	65.91
7	130179168	130366515	1	ENSMUSG00000030852	Tacc2	19.3637	1.69222	0.679342	1.01896	0.30822	1	protein coding	transforming, acidic coiled-coil containing protein 2	1.02598	0.587793	1.52309	1.24101	0.15311	0.942949	0.507932	0.031976	0.447898	0.68602	1.09387	0.187608	45	25	58	37	4	19	8	2	10	15	5	5	41.3543	18.5445	40.7909	37.6675	3.61212	21.5649	11.625	0.632534	10.0539	15.2355	27.3964	3.88696
13	21899933	21900313	-1	ENSMUSG00000094338	H2bc13	60.6795	1.69058	0.436158	1.58333	0.113346	1	protein coding	H2B clustered histone 13	31.6248	56.9542	50.382	64.4431	8.82227	7.88951	11.1255	13.4138	39.1574	35.8132	31.5767	29.548	91	142	101	132	16	11	16	17	58	52	52	54	90.0786	126.477	94.928	138.162	14.437	12.239	17.7392	18.1577	61.4907	55.7007	55.6745	43.0699
1	64719030	64729818	-1	ENSMUSG00000087213	2810408I11Rik	8.72499	1.68616	0.704386	0.974126	0.329994	1	lncRNA	RIKEN cDNA 2810408I11 gene	2.17982	2.78396	2.57322	0.707119	0.472757	0.654947	0.656971	0	1.70714	2.51086	0.574481	1.04417	18	19	15	4	3	4	5	0	7	10	5	7	21.0341	21.0269	16.4983	5.13817	2.67006	3.58583	3.59961	0	9.17376	13.3495	3.44452	5.17909
2	136723191	136733309	-1	ENSMUSG00000115423		27.2246	1.68434	0.663043	1.03212	0.302018	1	protein coding	novel protein	5.03783	5.31704	8.23686	4.05519	3.9768	0.581987	3.81321	2.04414	0	3.15452	0.737595	5.81764	59	53	68	34	29	3	22	11	0	18	5	42	57.2064	47.1627	62.4196	35.0181	26.0654	3.42154	24.9535	11.736	0	19.3415	5.42761	33.9424
1	169325503	169359033	-1	ENSMUSG00000026683	Nuf2	81.4118	1.68414	0.816112	0.838288	0.401869	1	protein coding	NUF2, NDC80 kinetochore complex component	4.63707	7.53117	8.68691	6.87296	0.320368	1.12795	0.875103	0.265715	5.12344	10.0632	2.90282	3.2702	141	197	190	154	6	17	6	4	79	157	49	60	130.114	165.406	161.958	145.223	5.26147	17.9577	13.9426	3.6591	80.0602	155.581	50.6115	47.1664
13	53121245	53135109	-1	ENSMUSG00000056749	Nfil3	51.9741	1.68016	0.361573	1.88111	0.059957	1	protein coding	nuclear factor, interleukin 3, regulated	6.11865	3.52153	3.715	3.1057	1.31112	2.01774	1.71756	1.00814	3.09125	1.73885	2.37488	1.9678	178	87	76	64	24	28	24	13	46	25	38	35	171.657	77.33	69.2506	65.6113	21.5291	32.1182	27.3605	13.8805	48.2966	26.8787	41.3997	28.3769
11	72981409	73038272	1	ENSMUSG00000005947	Itgae	7.06594	1.67992	0.691528	0.983207	0.325505	1	protein coding	integrin alpha E, epithelial-associated	0.377413	0.404483	0.269003	0.072651	0.082316	0.217136	0.072061	0.077544	0.101052	0.243406	0.188071	0.056577	22	20	11	3	3	6	2	2	3	7	6	2	21.1349	17.7294	10.0092	3.06366	2.69804	6.89917	2.29134	2.13113	3.15144	7.51029	6.54418	1.62855
13	56757336	56787375	1	ENSMUSG00000035493	Tgfbi	12.465	1.67927	0.466246	1.4569	0.145145	1	protein coding	transforming growth factor, beta induced	1.91075	1.67425	1.25399	1.697	0.507791	1.40173	0.579028	0.908604	0.839228	0.26197	0.883678	0.723405	77	46	30	25	4	5	7	4	13	1	7	6	32.7306	22.4481	14.2726	21.8899	5.09111	13.6237	5.63188	7.63843	8.0058	2.47253	9.40572	6.36954
1	69570373	69726404	-1	ENSMUSG00000025997	Ikzf2	17.8535	1.67658	0.840327	0.805137	0.420741	1	protein coding	IKAROS family zinc finger 2	0.376422	2.44495	0.70528	0.281341	0.212052	0.321932	0.043149	0.166152	0.06725	1.20513	0.186311	1.18	27	25	14	29	2	15	3	2	5	16	4	22	16.7759	85.2885	20.8849	9.44185	5.53137	8.14057	1.09192	3.6341	1.6691	29.5928	5.15935	27.0316
6	124806510	124810664	1	ENSMUSG00000023505	Cdca3	81.1844	1.67234	1.16707	0.576088	0.564556	1	protein coding	cell division cycle associated 3	9.18629	10.2435	14.7786	11.4929	0.290598	0.444553	0	0.254636	9.40441	15.8007	6.88123	7.02747	122	179	164	147	5	6	0	1	94	131	59	70	154.149	134.542	164.776	145.225	2.85412	4.23256	0	2.09701	87.8836	146.089	71.749	60.6147
13	21937605	21937997	-1	ENSMUSG00000063021	H2ac15	394.574	1.67075	0.446545	1.50209	0.133074	1	protein coding	H2A clustered histone 15	223.922	327.815	352.764	336.005	59.0172	78.4178	70.7772	78.7626	280.954	254.357	91.7514	186.826	680	866	750	727	115	120	109	109	444	393	160	362	672.35	771.265	704.189	760.344	103.742	133.694	121.008	116.387	470.611	421.049	171.4	288.849
19	6970386	6973485	-1	ENSMUSG00000037349	Nudt22	20.2342	1.66963	0.507336	1.3199	0.186868	1	protein coding	nudix (nucleoside diphosphate linked moiety X)-type motif 22	6.18488	2.51157	4.40517	3.69149	1.88454	3.12748	0.817826	3.20248	3.38654	1.31896	1.21137	0.772262	78	27	39	33	15	19	5	18	17	4	5	6	66.6454	21.1833	31.5399	29.9539	11.8857	19.1211	5.00386	16.9358	20.3222	7.83094	8.11081	4.27742
9	92339426	92374509	1	ENSMUSG00000032377	Plscr4	6.12228	1.66841	0.843581	0.792353	0.428155	1	protein coding	phospholipid scramblase 4	0.249933	0.343748	0.236818	0.565713	0.099393	0.087587	0	0	0.407488	0.389487	0.169061	0.102433	12	14	8	18	3	2	0	0	10	6	2	3	10.1478	10.9244	6.38884	17.2964	2.36202	2.01775	0	0	9.21379	8.71327	4.26522	2.1378
12	70237585	70278262	-1	ENSMUSG00000021069	Pygl	13.8983	1.66785	0.738482	0.904355	0.365807	1	protein coding	liver glycogen phosphorylase	0.286224	0.421673	0.8401	2.59508	0.417275	0.551715	1.06859	0.107758	0.093315	0.096645	0.294544	0.421281	12	15	25	9	11	12	23	2	2	2	7	11	9.84185	11.349	19.1938	67.1946	8.39791	10.7638	20.8635	1.81845	1.7869	1.83101	6.29319	7.44596
6	88701394	88805342	1	ENSMUSG00000033174	Mgll	16.2136	1.66478	0.660064	1.00714	0.313867	1	protein coding	monoglyceride lipase	1.0399	1.28492	3.84279	1.87208	0.327606	0.194066	1.20673	1.63746	1.4762	0.145866	1.58852	0.497498	60	27	27	15	3	3	15	5	18	4	12	6	20.3453	19.677	49.9547	27.5809	3.75146	2.15428	13.4056	15.7226	16.0839	1.57242	19.3115	5.00313
6	94581510	94677139	-1	ENSMUSG00000030029	Lrig1	12.9078	1.66366	0.605026	1.09691	0.27268	1	protein coding	leucine-rich repeats and immunoglobulin-like domains 1	0.539473	0.759821	0.392228	0.408385	0.435024	0.227233	0.112801	0.244031	0.184782	0.191498	0.049224	0.878539	40	49	21	22	2	8	4	8	7	7	2	9	28.2272	31.1185	13.6362	16.0909	13.3226	6.74603	3.35133	6.26645	5.38436	5.5208	1.60039	23.6285
18	24841680	25266558	1	ENSMUSG00000034295	Fhod3	18.6125	1.6619	0.979433	0.675799	0.499169	1	protein coding	formin homology 2 domain containing 3	1.02424	0.650589	0.317183	0.611932	0.047195	0.165944	0.054918	0.029701	2.09532	0.439843	0.023965	0.064666	78	42	17	33	1	6	2	1	14	14	1	3	59.7305	29.697	12.2903	26.8727	1.61089	5.49082	1.8185	0.85005	68.0489	14.133	0.868394	1.93842
11	83538670	83540181	-1	ENSMUSG00000000982	Ccl3	16.8174	1.65925	0.756257	0.871726	0.383358	1	protein coding	chemokine (C-C motif) ligand 3	1.1292	8.32203	2.57678	6.68758	3.03474	4.42167	0	1.26181	1.5385	0.226413	2.42994	3.28083	10	63	16	42	17	19	0	5	7	1	12	18	9.7082	56.0024	14.7198	43.2961	15.271	21.5691	0	5.32401	7.36612	1.07253	12.9811	14.4987
1	85137485	85171981	1	ENSMUSG00000089716	Gm6264	12.6785	1.65897	0.822175	0.801498	0.422843	1	transcribed unprocessed pseudogene	predicted gene 6264	3.46986	4.84952	2.32562	1.82112	0	0.946003	3.84779	1.75174	2.33565	0.746836	0	2.20809	29	34	12	14	0	3	20	5	19	3	0	22	32.0549	35.1894	13.5757	12.8104	0	4.82724	20.3777	7.57743	11.7251	3.5531	0	10.451
3	90520189	90531488	1	ENSMUSG00000001025	S100a6	59.34	1.65841	0.580989	1.13326	0.257103	1	protein coding	S100 calcium binding protein A6 (calcyclin)	12.152	40.3673	22.9551	10.3684	1.90487	10.1461	3.45254	1.95935	11.7857	22.2453	13.0019	11.6382	101	223	94	61	10	17	14	8	39	63	40	51	79.0361	205.503	99.201	50.7813	7.25141	37.442	12.7504	6.25417	42.6885	79.7183	52.5455	38.9085
X	74615652	74621837	-1	ENSMUSG00000031202	Rab39b	13.128	1.65322	0.767795	0.850774	0.394895	1	protein coding	RAB39B, member RAS oncogene family	0.293099	0.575945	0.499871	1.15881	0.031085	0.821947	0.040806	0.044162	0.382321	0.356461	0.391819	0.128161	15	25	18	42	1	20	1	1	10	9	11	4	14.4441	22.216	16.3678	43.0032	0.896619	22.9825	1.14183	1.06808	10.4925	9.67892	11.998	3.24646
13	21964053	21964795	-1	ENSMUSG00000058773	H1f5	780.809	1.65257	0.430495	1.51586	0.129555	1	protein coding	H1.5 linker histone, cluster member	168.483	225.948	235.458	255.18	41.897	58.4587	54.2601	52.8981	162.773	196.214	92.0472	138.15	1430	1640	1401	1536	225	241	225	201	710	831	436	727	1390.41	1459.51	1291.1	1585.79	202.371	273.726	254.257	214.243	748.077	892.192	472.006	586.026
7	95820453	96560300	1	ENSMUSG00000048078	Tenm4	160.324	1.6489	0.331526	1.95731	0.0503113	1	protein coding	teneurin transmembrane protein 4	5.48469	2.31778	3.97845	4.83875	2.9541	1.19248	0.988417	3.11752	1.32562	1.64235	2.04071	2.56067	496	222	208	311	89	72	40	71	96	99	127	116	472.961	156.443	227.954	314.21	149.1	58.3449	48.3971	131.936	63.6601	78.0334	109.346	113.502
2	90716204	90720869	1	ENSMUSG00000040794	C1qtnf4	7.57584	1.64697	0.709947	0.911297	0.362139	1	protein coding	C1q and tumor necrosis factor related protein 4	1.33183	0.544417	1.23628	0.980602	0.367524	0.966143	0	0.130263	0.452217	0.817905	0.733884	0.283	23	8	15	12	4	8	0	1	4	7	7	3	22.2199	7.10946	13.7047	12.3197	3.58887	9.14568	0	1.06659	4.20162	7.51863	7.60801	2.42694
4	130519848	130553630	1	ENSMUSG00000025743	Sdc3	118.349	1.64139	0.396951	1.61578	0.106142	1	protein coding	syndecan 3	12.4731	9.77823	6.79503	2.80898	3.55937	2.01124	4.08296	3.66796	4.9778	6.97578	2.75947	2.92976	406	207	118	124	48	46	52	63	90	107	54	70	403.179	247.397	145.94	68.3733	67.3404	36.8866	74.9385	58.1874	89.606	124.239	55.4242	48.6782
19	5515071	5518535	-1	ENSMUSG00000024910	Ctsw	8.32691	1.64083	0.914707	0.700588	0.48356	1	protein coding	cathepsin W	0.972456	1.42457	0.604542	2.07169	0	0.279527	0.138859	0	0.655164	0.611916	0.728264	2.29426	13	25	7	24	0	2	1	0	5	5	6	20	14.6772	16.8294	6.0626	23.5456	0	2.39374	1.19002	0	5.5068	5.0887	6.82987	17.799
10	85890989	86334760	-1	ENSMUSG00000059602	Syn3	13.4277	1.63985	0.728926	0.877803	0.38005	1	protein coding	synapsin III	0.705797	1.07575	0.616804	0.069567	0.021728	0.235853	0.514769	0.321656	0.415266	0.114145	0.464513	0.272798	38	44	19	3	1	8	15	9	9	3	7	5	34.1549	40.7468	19.8325	2.53505	0.615413	6.4758	14.1446	7.63912	11.1912	3.0435	13.9676	6.78566
3	96177037	96186317	1	ENSMUSG00000050936	Gm42743	31.4641	1.63691	0.490203	1.29928	0.193849	1	lncRNA	predicted gene 42743	2.37567	3.93241	4.74836	3.77188	0.921152	0.609848	0.605368	0.549315	2.93266	2.35303	2.57612	2.61549	49	70	69	56	12	6	6	5	31	24	30	33	47.3183	62.2331	62.991	57.4763	10.7693	6.87122	6.83017	5.33708	32.567	25.7973	32.6492	26.7298
4	86566623	86588297	-1	ENSMUSG00000028494	Plin2	33.7123	1.63641	0.431995	1.47319	0.1407	1	protein coding	perilipin 2	6.2371	4.21795	7.49466	1.73338	2.0189	2.80646	3.23908	1.59441	2.48911	2.05412	1.01426	3.51895	82	88	49	33	17	36	11	19	16	21	15	16	96.3926	51.0237	76.9611	20.1729	18.2622	24.6093	28.4242	12.0932	21.423	17.4915	9.74002	27.9545
13	21919234	21920007	1	ENSMUSG00000067455	H4c11	64.175	1.63227	0.557454	1.13421	0.256705	1	protein coding	H4 clustered histone 11	10.1663	19.121	17.6718	22.2344	2.38197	4.41959	0.959812	4.17879	20.3532	13.1768	10.4625	5.90585	91	147	111	142	14	19	4	17	94	59	52	33	88.4288	130.811	102.209	146.522	12.5891	21.5968	4.52318	18.1218	99.0171	63.3497	56.3192	26.6127
2	113158081	113547112	1	ENSMUSG00000044042	Fmn1	17.161	1.63116	0.683673	0.923197	0.355904	1	protein coding	formin 1	0.815555	0.498112	0.648202	1.37165	0.266954	0.982863	0.454181	0.099813	0.051285	0.548511	0.54249	0.116838	34	28	14	24	17	33	5	2	2	19	7	6	38.0168	18.1744	20.0767	48.148	7.28346	25.9954	12.0215	2.28343	1.33134	14.088	15.7132	2.79952
14	46997998	47009126	1	ENSMUSG00000037628	Cdkn3	15.9429	1.62873	0.922522	0.681536	0.495532	1	protein coding	cyclin-dependent kinase inhibitor 3	3.03231	3.17274	2.63606	2.26751	0.113903	0.300431	0	0.242514	4.52448	3.11279	0.321562	2.27211	25	22	19	15	2	4	0	3	22	18	2	18	38.8476	31.8153	22.4391	21.8752	0.854091	2.18381	0	1.52478	32.2801	21.9726	2.55979	14.9623
13	41254903	41264511	-1	ENSMUSG00000021362	Gcm2	16.1459	1.62511	0.777244	0.804259	0.421247	1	protein coding	glial cells missing homolog 2	1.78192	0.652073	0.464403	1.01495	0.997423	0.320631	0.106127	0.114914	0.398088	0.353122	0.046328	1.73403	48	25	15	33	13	6	2	2	8	8	1	22	61.8291	17.7097	10.7068	26.5194	20.2565	6.31235	2.09092	1.95685	7.69237	6.75106	0.998842	30.9271
3	96508465	96533487	1	ENSMUSG00000049288	Lix1l	11.9242	1.62102	0.671552	0.924752	0.355095	1	protein coding	Lix1-like	0.562841	0.473974	0.342831	1.52627	0.063955	0.338185	0.251841	0.320495	0.275306	0.162969	0.219839	1.14288	28	20	12	21	2	8	6	2	7	4	6	17	21.1509	13.9415	8.56017	43.1903	1.40668	7.21071	5.37374	5.91077	5.7615	3.37434	5.13332	22.0762
16	17870724	17889496	1	ENSMUSG00000003531	Dgcr6	42.9021	1.62063	0.321651	1.9295	0.0536687	1	protein coding	DiGeorge syndrome critical region gene 6	8.39375	6.70235	6.5496	8.74276	2.48078	4.98608	3.59	1.80268	3.71434	4.9533	2.83979	4.60383	121	81	54	85	26	25	15	12	26	35	22	35	106.154	66.3461	55.0366	83.2606	18.3631	35.7782	25.7797	11.1886	26.1599	34.5155	22.3159	29.9279
11	102796355	102815950	-1	ENSMUSG00000051378	Kif18b	41.8729	1.61971	1.09088	0.568085	0.569977	1	protein coding	kinesin family member 18B	1.10061	2.31204	2.33213	3.16465	0.031834	0.33667	0.125356	0	2.97932	2.51467	0.364756	1.79084	55	98	82	112	1	8	3	0	44	62	10	39	48.8725	80.3598	68.8088	105.821	0.827367	8.48237	3.16071	0	73.6761	61.5257	10.0643	40.8759
9	70314974	70328829	-1	ENSMUSG00000032218	Ccnb2	72.0798	1.61655	0.832781	0.740354	0.459086	1	protein coding	cyclin B2	6.29124	8.73556	8.4797	9.14671	1.27688	0.197767	0.589309	0.958927	7.94708	10.8947	2.40252	6.09869	133	157	126	137	17	2	6	9	86	114	28	79	128.426	139.578	115.015	140.603	15.2561	2.29061	6.8307	9.60689	90.3443	122.539	30.4743	63.9929
9	15404728	15456556	1	ENSMUSG00000058173	Smco4	31.681	1.61577	0.432617	1.42336	0.154633	1	protein coding	single-pass membrane protein with coiled-coil domains 4	4.31466	6.6547	6.71542	7.21403	2.91164	1.65844	1.31839	0.92059	6.07638	2.89457	4.03485	2.46396	54	71	59	64	23	10	8	4	39	18	28	19	51.2343	61.8519	52.9842	64.5068	20.2363	11.1736	8.88923	5.36489	40.1824	18.9383	29.7709	15.0393
11	20252180	20282713	-1	ENSMUSG00000020142	Slc1a4	15.8	1.61456	0.734429	0.836787	0.402712	1	protein coding	solute carrier family 1 (glutamate/neutral amino acid transporter), member 4	1.15752	0.562101	0.387068	0.213198	0.352124	0.609014	0.455693	0.538806	0.133252	0.102045	0	0.223407	69	28	16	9	13	17	13	14	4	3	0	8	65.8007	25.0106	14.6199	9.12632	11.7159	19.643	14.7088	15.0318	4.21841	3.19618	0	6.52792
6	124841655	124865184	-1	ENSMUSG00000023274	Cd4	12.0811	1.61414	0.712666	0.861744	0.388828	1	protein coding	CD4 antigen	0.780321	0.2283	0.922134	1.1048	0	0.579253	0.180668	0.972453	0.126298	0.348861	0.313708	0.388006	31	9	21	24	0	7	2	20	3	8	8	11	28.5017	6.52702	22.3795	30.3874	0	12.0045	3.74701	17.432	2.56903	7.02089	7.11988	7.28475
6	68657363	68657832	1	ENSMUSG00000094902	Igkv10-95	31.3891	1.61289	0.512212	1.19656	0.23148	1	IG V gene	immunoglobulin kappa variable 10-95	29.1384	58.7838	15.1104	40.4071	9.44512	10.7437	7.24822	10.9926	16.652	23.1031	40.0638	14.9624	47	89	20	69	12	9	7	12	16	22	55	23	57.2842	91.096	19.7655	59.9476	10.8914	12.0098	8.10843	10.6287	18.2702	24.8128	48.7027	15.1524
17	56610321	56630486	1	ENSMUSG00000001228	Uhrf1	311.142	1.61044	0.658862	0.926508	0.354182	1	protein coding	ubiquitin-like, containing PHD and RING finger domains, 1	10.4348	20.3152	19.7154	22.7738	4.40209	1.37711	3.66349	1.41587	15.1693	16.4759	10.989	12.756	451	856	721	734	97	35	51	22	322	436	175	315	416.114	634.104	522.389	683.877	102.746	31.1586	82.9526	27.7097	336.877	362.01	272.294	261.471
2	103093778	103133623	-1	ENSMUSG00000012350	Ehf	16.142	1.60872	0.706647	0.861421	0.389006	1	protein coding	ets homologous factor	2.16922	0.870483	0.900119	1.03901	0.625469	0.18488	0.538446	0.975084	0.991405	1.72044	0	0.360251	74	21	13	23	16	6	6	4	11	13	0	15	58.5906	18.4033	16.1541	21.1328	9.888	2.83331	8.25795	12.9255	14.9125	25.6039	0	5.00159
14	65835995	65885980	1	ENSMUSG00000061356	Nuggc	137.151	1.60843	0.980432	0.620573	0.53488	1	protein coding	nuclear GTPase, germinal center associated	11.4701	7.62662	7.72699	5.00281	0.294612	0.41356	0.359323	0.35862	9.27566	10.0427	4.04797	6.36942	439	263	208	144	7	8	7	6	184	190	84	158	432.809	225.254	193.731	142.153	6.50667	8.85418	7.69874	6.64116	194.917	208.796	94.911	123.54
GL456221.1	17591	30203	-1	ENSMUSG00000079222		17.895	1.6075	0.541856	1.12114	0.262227	1	protein coding		2.21425	4.04321	2.8205	1.50645	1.06543	1.84347	1.14343	0.337843	1.80055	2.22504	0.24506	1.19312	35	55	32	17	11	14	9	2	15	18	2	12	33.8487	48.9089	29.2731	17.47	9.87653	16.0045	10.2291	2.13414	15.7683	19.3428	2.1741	9.70988
17	56347439	56379289	1	ENSMUSG00000002835	Chaf1a	155.594	1.60726	0.420514	1.44408	0.148717	1	protein coding	chromatin assembly factor 1, subunit A (p150)	1.90331	7.487	4.13988	7.07463	1.1782	2.22142	0.788285	1.34585	3.56703	4.71525	2.62799	2.17975	173	300	257	302	67	35	41	53	160	203	88	114	135.443	417.028	195.746	379.108	49.073	89.6927	31.8519	47.0029	141.361	184.881	116.204	79.7318
6	143774151	144727703	-1	ENSMUSG00000041540	Sox5	80.1091	1.6062	0.476901	1.27112	0.203684	1	protein coding	SRY (sex determining region Y)-box 5	3.13253	10.1109	5.81828	7.15679	3.56627	0.722676	1.37761	1.49995	2.75092	7.54501	3.66271	3.05057	136	199	177	134	20	18	23	20	51	62	64	74	88.9595	224.748	109.787	153.048	59.2774	11.6445	22.214	20.9051	43.5061	118.058	64.6322	44.5302
8	95826456	95929440	-1	ENSMUSG00000031788	Kifc3	29.3663	1.6044	0.62255	0.970853	0.331622	1	protein coding	kinesin family member C3	2.16168	4.28076	1.39221	1.91726	1.83255	1.21948	0.973259	0	1.14535	2.70566	0.516168	0.910945	98	136	22	48	29	18	10	0	5	31	14	20	58.0796	90.0252	24.854	38.7906	28.8182	18.5903	14.848	0	17.1375	40.0541	8.61733	12.5807
13	3528230	3551393	1	ENSMUSG00000097709	2810429I04Rik	12.3866	1.60399	0.653136	0.924759	0.355091	1	lncRNA	RIKEN cDNA 2810429I04 gene	0.320324	1.70726	1.58188	1.76824	0.084139	1.15328	1.08546	0.376278	0.206983	0.554842	0.672732	0.680684	4	22	15	26	2	24	12	4	4	4	15	8	7.07181	29.5021	23.2046	29.3965	1.08722	14.4463	13.607	4.07691	2.5448	6.74922	9.22856	7.72445
9	107173225	107179983	1	ENSMUSG00000032578	Cish	18.7294	1.60356	0.777971	0.775817	0.437857	1	protein coding	cytokine inducible SH2-containing protein	1.18955	0.398161	0.509099	1.96858	0.117534	0.350429	0.921762	0.328912	1.57433	0.575783	0.025346	0.156426	69	15	17	14	3	11	20	9	15	13	1	5	48.0471	12.5879	13.6629	59.8757	2.77859	8.03089	21.1401	6.51994	35.4124	12.814	0.636127	3.24767
11	78717410	78737696	1	ENSMUSG00000072640	Lyrm9	121.584	1.60319	0.502091	1.20135	0.229614	1	protein coding	LYR motif containing 9	3.43915	6.41748	5.03044	12.1082	1.25482	3.60858	1.66654	1.7838	5.6758	7.49825	0.66896	3.04849	54	57	92	75	99	121	100	99	91	100	46	156	144.183	210.591	140.129	382.258	30.7911	85.8381	39.6722	36.7021	132.516	173.207	17.4266	65.6944
1	60521451	60606263	-1	ENSMUSG00000026014	Raph1	41.1294	1.5984	0.548822	1.09034	0.275564	1	protein coding	Ras association (RalGDS/AF-6) and pleckstrin homology domains 1	0.97477	1.51341	2.18847	0.892513	0.600878	1.00503	0.688457	0.11494	0.422537	1.96168	0.266734	0.406793	91	60	98	67	8	20	14	8	34	19	23	39	65.493	79.5901	97.6993	45.1565	23.6297	38.3135	26.2649	3.79004	15.8101	72.6211	11.1358	14.049
6	50270310	50433181	-1	ENSMUSG00000029822	Osbpl3	34.6628	1.59807	0.652312	0.916842	0.359226	1	protein coding	oxysterol binding protein-like 3	1.68545	3.44698	1.38191	0.901309	0.403239	0.450354	0.105523	0.20982	1.7986	1.65975	1.62407	0.906466	78	143	44	31	11	14	4	5	40	42	15	10	69.9248	111.934	38.0936	28.158	9.79165	10.6011	2.4858	4.27209	41.5552	37.9401	41.8666	19.3306
12	17038649	17050409	-1	ENSMUSG00000045679	Pqlc3	247.072	1.59731	0.637065	0.937595	0.348453	1	protein coding	PQ loop repeat containing	36.5284	24.1009	22.6399	15.1259	6.83908	2.60847	5.90658	5.41361	28.8046	29.4478	9.94901	8.55041	637	382	317	298	120	41	82	64	214	162	154	158	795.38	410.76	327.55	248.015	87.1605	32.2262	73.0273	57.8509	349.286	353.296	134.609	95.6994
X	20726750	20787243	-1	ENSMUSG00000037217	Syn1	9.34002	1.59667	0.741681	0.804488	0.421115	1	protein coding	synapsin I	0.270308	0.367688	0.709268	0.557831	0.297683	0.480927	0.341387	0	0.159949	0.294982	0	0.136351	13	15	24	19	9	11	8	0	4	7	0	4	12.5602	13.3729	21.8981	19.5188	8.09597	12.6793	9.00718	0	4.13898	7.5522	0	3.25666
5	107864523	107873902	-1	ENSMUSG00000029275	Gfi1	63.3694	1.5928	0.316487	1.87306	0.0610602	1	protein coding	growth factor independent 1 transcription repressor	4.33925	2.62357	2.74859	4.82323	1.24252	1.2386	2.0348	1.27604	2.80681	1.71665	1.58636	2.19833	140	91	77	132	33	24	36	24	59	36	37	57	167.605	79.3187	70.5409	140.289	28.0902	27.1446	44.6272	24.1889	60.3756	36.5339	38.0736	43.6459
6	138117314	138133753	1	ENSMUSG00000008540	Mgst1	12.2361	1.5921	0.80287	0.737478	0.460831	1	protein coding	microsomal glutathione S-transferase 1	2.62955	1.38231	4.58864	3.78277	1.13794	0.796116	3.63769	0	0.920937	1.61556	0	3.72243	20	18	30	41	10	5	10	0	2	10	0	14	23.9688	9.86236	27.7912	25.9649	6.07103	4.11738	18.8276	0	4.67487	8.11388	0	17.4409
19	11298403	11313510	-1	ENSMUSG00000024672	Ms4a7	21.3558	1.59199	0.576434	1.02699	0.304424	1	protein coding	membrane-spanning 4-domains, subfamily A, member 7	2.49545	2.01643	1.13776	1.06214	0.437999	0.695253	1.15899	0.165944	1.03038	1.23112	0.368103	1.85248	43	24	14	9	15	16	13	4	14	23	11	30	67.6513	42.7879	20.4945	21.6831	6.94989	10.6942	17.8407	2.20785	15.556	18.3894	6.20077	25.8142
7	126626901	126641643	-1	ENSMUSG00000030677	Kif22	71.9983	1.59154	0.673614	0.878151	0.379862	1	protein coding	kinesin family member 22	5.38726	5.52044	6.54861	6.12139	0.651279	0.594646	0.493921	0.295725	5.24191	8.31064	3.27128	3.42865	116	144	142	136	13	13	5	4	86	84	54	58	149.63	120.015	120.854	128.031	10.5876	9.37109	7.78957	4.03106	81.0805	127.182	56.4571	48.95
12	113625389	113625913	-1	ENSMUSG00000095285	Ighv5-9	33.3595	1.59147	0.604004	0.979247	0.327458	1	IG V gene	immunoglobulin heavy variable 5-9	21.7463	21.0255	39.4881	9.4999	5.50976	9.968	1.16757	8.42172	13.1239	33.0337	10.2836	4.16707	74	62	94	23	12	17	2	13	23	57	20	9	72.9923	55.2394	88.0675	24.0117	10.8244	18.9837	2.22525	13.8731	24.3656	61.093	21.448	7.18955
4	20042052	20066750	1	ENSMUSG00000073987	Ggh	76.5159	1.58952	0.379078	1.55514	0.119913	1	protein coding	gamma-glutamyl hydrolase	7.00778	7.07839	7.7399	3.51519	2.4873	1.26742	2.66548	1.52456	3.89417	5.25366	4.26764	2.67585	197	169	153	70	44	17	36	19	56	73	66	46	190.003	150.219	139.435	71.7696	39.4716	19.4975	41.0355	20.2864	58.7989	78.4842	71.898	37.2923
2	4994525	5017602	-1	ENSMUSG00000026669	Mcm10	60.088	1.58809	0.463572	1.2686	0.204585	1	protein coding	minichromosome maintenance 10 replication initiation factor	3.13923	3.80619	6.47861	5.32362	1.45676	0.63415	0.538099	1.59121	3.26627	4.89005	1.78201	2.76326	117	177	168	137	9	7	9	7	91	115	31	90	95.2202	90.3664	130.571	121.598	25.8627	10.9139	9.26772	23.6873	55.1739	81.726	33.5866	43.083
8	4785976	4829567	-1	ENSMUSG00000022322	Shcbp1	34.6357	1.58165	0.74398	0.781804	0.43433	1	protein coding	Shc SH2-domain binding protein 1	4.13734	3.33622	3.76767	3.27907	0.308654	0.422624	0	0.666482	3.82771	3.25186	3.81676	1.43432	66	87	83	73	2	3	0	7	47	50	31	28	88.1794	55.6557	53.3553	52.6269	3.85031	5.11068	0	6.9713	45.4319	38.1873	50.5463	15.7134
9	33639543	33640146	1	ENSMUSG00000079884	Tmed2b	26.4865	1.58088	0.523252	1.11013	0.266943	1	processed pseudogene	transmembrane p24 trafficking protein 2B	15.4282	7.81835	8.05965	5.53956	4.75002	2.58117	7.28026	4.01669	2.20399	11.3803	2.01666	3.52253	97	42	35	25	19	8	22	11	7	36	7	14	94.6697	37.3954	32.4102	25.8921	17.1085	9.04382	24.7595	11.722	7.38594	38.6382	7.5575	11.2545
11	29693048	29976033	-1	ENSMUSG00000044072	Eml6	66.7433	1.58038	0.576294	1.0071	0.313888	1	protein coding	echinoderm microtubule associated protein like 6	3.27192	1.9121	0.562024	0.759877	1.21518	0.233588	1.1419	0.286534	1.71671	1.05999	0.511097	0.689013	282	189	50	68	49	14	18	16	54	66	10	53	274.149	125.402	31.2895	47.9447	59.5942	11.1049	54.327	11.7826	80.1045	48.936	26.6096	29.675
10	81228885	81231226	1	ENSMUSG00000078439	Smim24	25.4178	1.57869	0.644719	0.89758	0.36941	1	protein coding	small integral membrane protein 24	4.62508	5.74123	5.74301	4.78737	1.47737	1.69086	0.698887	0.813163	4.26504	8.42196	0.305602	2.47527	52	56	45	38	11	9	4	4	25	46	2	18	51.0431	49.5945	42.113	39.7858	9.54304	10.5878	4.37956	4.40428	26.213	51.2121	2.09567	14.0417
12	114321379	114321838	-1	ENSMUSG00000076671	Ighv13-2	66.4472	1.5769	0.656771	0.878383	0.379736	1	IG V gene	immunoglobulin heavy variable 13-2	34.4067	42.7856	187.383	19.8372	13.672	9.24202	24.9221	14.5892	92.3162	11.707	63.7343	13.4271	88	82	307	32	16	12	24	17	123	13	94	22	79.231	77.1188	286.709	34.3989	18.4275	12.0753	32.5867	16.4878	118.388	14.8538	91.1961	15.8933
1	136394081	136459249	1	ENSMUSG00000041498	Kif14	67.855	1.57607	0.870748	0.661575	0.508243	1	protein coding	kinesin family member 14	1.59102	2.17571	1.8178	2.17088	0.128174	0.241854	0.178367	0.02949	2.01457	1.87364	1.58718	1.26708	128	148	102	113	7	14	6	1	77	69	69	80	126.312	135.202	95.8902	129.783	5.95591	10.8944	8.04062	1.149	89.0696	81.959	78.297	51.7075
17	26120830	26121201	1	ENSMUSG00000057580	Cox7c-ps1	7.86759	1.57248	0.714999	0.800679	0.423317	1	transcribed processed pseudogene	cytochrome c oxidase subunit 7C, pseudogene 1	6.33085	3.36533	11.6108	21.6716	9.32306	3.64003	8.00233	3.25691	2.80561	3.57904	8.15178	1.15068	7	8	6	12	6	5	11	4	4	5	4	2	10.7461	4.45428	12.8917	27.7009	9.26252	3.4739	7.61546	2.67207	2.65213	3.34732	8.59786	0.996799
19	24071869	24202394	-1	ENSMUSG00000024812	Tjp2	91.8518	1.57073	0.298345	1.91297	0.0557514	1	protein coding	tight junction protein 2	3.53426	4.60291	2.97958	3.71771	0.934474	2.79876	1.71288	1.61277	1.52281	3.0625	1.45411	1.56033	254	249	151	191	42	31	29	23	56	108	57	68	194.228	197.997	108.8	153.852	30.058	87.2691	53.45	43.4978	46.6053	92.7326	49.6549	44.0767
2	25262333	25268225	1	ENSMUSG00000026955	Sapcd2	22.4838	1.56924	0.875195	0.650419	0.515421	1	protein coding	suppressor APC domain containing 2	1.53036	2.36368	1.32068	4.14479	0	0.045038	0.083729	0.983249	1.45075	1.94582	2.20877	2.43184	51	47	34	44	0	1	1	7	23	25	14	15	33.1986	40.1352	19.0362	67.708	0	0.554354	1.03135	10.4681	17.5264	23.2579	29.7732	27.1168
11	40592222	40624249	-1	ENSMUSG00000020330	Hmmr	124.135	1.5668	0.994963	0.569674	0.568899	1	protein coding	hyaluronan mediated motility receptor (RHAMM)	3.36924	6.55767	7.0496	6.78977	0.269393	0.106891	0.644035	0.114832	5.30368	5.59558	6.19141	3.57019	199	323	293	284	10	3	7	3	155	163	97	110	163.703	249.393	227.587	248.423	7.66108	2.94676	17.7681	2.73821	143.509	149.8	186.923	89.165
3	32634481	32670734	-1	ENSMUSG00000027669	Gnb4	37.2071	1.56473	0.676527	0.834744	0.403862	1	protein coding	guanine nucleotide binding protein (G protein), beta 4	3.47659	1.97267	0.158839	1.39066	0.73584	1.42021	0.349505	0.42619	1.28593	0.77372	0.279654	2.51998	111	48	10	38	18	40	7	11	30	29	12	19	148.839	66.1039	4.51835	44.8329	18.4385	34.4982	8.49615	8.95459	30.659	18.2511	7.43931	55.4548
11	68393845	68443524	1	ENSMUSG00000046207	Pik3r6	15.5965	1.56118	0.76515	0.733425	0.463299	1	protein coding	phosphoinositide-3-kinase regulatory subunit 5	1.03791	1.21912	1.18014	0.436314	0.296103	0.043648	0.56341	0.330836	0.446744	0.544919	1.87803	0.034031	50	50	40	15	9	1	13	1	11	13	8	1	35.1994	32.3617	26.5929	11.1426	5.87752	0.839882	10.8493	5.50638	8.43738	10.1823	39.5754	0.593235
4	134265203	134279477	-1	ENSMUSG00000050989	Selenon	20.4228	1.56007	0.357524	1.56654	0.117223	1	protein coding	selenoprotein N	0.55894	1.15895	1.31482	0.852947	0.2453	0.608099	0.402522	0.348494	0.452542	0.586027	0.421637	0.600501	29	51	48	24	8	15	10	8	12	15	12	19	27.3103	44.3236	42.6859	31.383	7.01513	16.8583	11.1675	8.35672	12.3139	15.7768	12.8011	15.0818
7	26957858	26981569	1	ENSMUSG00000063160	Numbl	40.978	1.55905	0.703552	0.794608	0.426841	1	protein coding	numb-like	4.11555	0.62952	0.432327	1.07968	0.356626	1.74612	2.36579	0.498804	0.695103	0.319886	0.613728	0.274288	49	12	17	35	20	33	33	26	27	21	27	13	211.208	25.2873	14.7419	41.7242	10.7121	50.8436	68.9387	12.563	19.8658	9.0452	19.5707	7.23546
3	52647137	52684077	1	ENSMUSG00000102785	Gm2447	8.69487	1.55649	0.989229	0.562547	0.573743	1	lncRNA	predicted gene 2447	0.750966	0.091595	0.996063	2.37295	0	0.325933	0.890187	1.6668	0.152086	0.629467	0	0.445113	4	2	18	16	0	4	11	19	2	8	0	7	14.4031	1.37505	12.6935	34.2717	0	3.54686	9.69443	15.6892	1.62443	6.65197	0	4.38818
13	113230359	113237515	-1	ENSMUSG00000023132	Gzma	13.6201	1.55632	0.96907	0.574077	0.565916	1	protein coding	granzyme A	2.86568	3.66859	2.54214	2.38324	0	0.582764	0	0	1.24326	3.39522	3.03993	2.88803	31	34	19	18	0	3	0	0	8	18	18	19	30.2405	30.302	17.8246	18.9384	0	3.48927	0	0	7.30634	19.7411	19.9331	15.6654
9	57913694	57934306	1	ENSMUSG00000032323	Cyp11a1	13.6111	1.55336	0.740609	0.747164	0.454965	1	protein coding	cytochrome P450, family 11, subfamily a, polypeptide 1	0.359462	1.29716	1.43004	0.872628	0.05194	0.352837	0.478497	0.087285	0.127783	0.989329	0.235439	1.63757	11	22	32	27	1	8	11	2	2	17	6	11	11.423	32.2648	30.1948	20.8818	0.966075	6.36182	8.63399	1.36128	2.26139	17.3224	4.64894	27.0126
10	61551042	61575039	1	ENSMUSG00000020085	Aifm2	20.3774	1.55159	0.599104	0.920689	0.357213	1	protein coding	apoptosis-inducing factor, mitochondrion-associated 2	0.984971	4.57874	1.62488	5.30098	0.467242	2.52374	1.5714	3.28695	0.895165	0.615173	0.715402	2.61172	38	61	33	40	8	11	8	13	4	14	7	9	14.6188	53.1919	16.024	59.2459	4.05891	21.2527	13.2428	23.9421	7.39892	5.0307	6.59766	19.9248
2	73171850	73216916	-1	ENSMUSG00000041762	Gpr155	234.219	1.55004	0.342499	1.60596	0.108282	1	protein coding	G protein-coupled receptor 155	16.2751	7.05819	8.28122	4.27476	4.09806	2.97909	4.48654	8.6461	3.89591	4.07963	4.82355	5.02939	739	280	319	232	132	100	167	132	128	149	154	144	889.935	302.092	300.877	176.019	131.157	92.4272	139.3	232.026	118.637	122.913	163.89	141.361
7	24206431	24215107	1	ENSMUSG00000064264	Zfp428	7.73566	1.54649	0.708841	0.770956	0.440733	1	protein coding	zinc finger protein 428	1.30466	1.28535	0.746089	1.41463	0.306289	0.311655	1.36393	0.673434	0.376899	0.778756	0.947605	0	19	16	8	15	3	2	10	4	3	6	7	0	18.4601	14.2354	7.01432	15.0727	2.53657	2.50201	10.958	4.6764	2.96987	6.07127	8.33131	0
4	97660971	98007111	1	ENSMUSG00000028565	Nfia	23.5563	1.54597	0.488542	1.11754	0.263762	1	protein coding	nuclear factor I/A	2.26506	1.3759	2.1192	2.00267	0.601417	0.664569	0.445712	2.26326	1.7267	0.391525	0.511553	1.41183	31	35	20	36	8	13	26	28	18	4	10	29	60.5637	28.7958	37.6497	40.3232	9.41208	10.0822	6.76694	29.6993	25.7113	5.76807	8.4991	19.4041
13	34258257	34261990	-1	ENSMUSG00000058672	Tubb2a	59.0757	1.54265	0.327529	1.65681	0.0975581	1	protein coding	tubulin, beta 2A class IIA	6.41789	5.45605	5.27407	7.00397	3.17801	1.4098	2.25541	2.35991	5.02315	3.87003	1.85598	4.15412	144	104	83	111	45	15	24	23	58	43	23	57	139.011	92.4556	75.7361	113.893	40.3804	17.1851	27.3306	24.5524	60.9228	46.2229	25.0377	46.1807
17	34835636	34847484	-1	ENSMUSG00000015474	Ppt2	15.3855	1.5376	0.577765	0.930479	0.352123	1	protein coding	palmitoyl-protein thioesterase 2	2.92625	1.37207	1.65842	2.2977	1.40865	1.29166	0.346242	0.307437	2.31139	1.09437	0.735591	0.680216	64	28	28	18	15	11	4	2	27	13	1	10	47.2502	17.3411	17.7928	27.9382	13.3129	11.8337	3.17451	2.43628	20.7845	9.73634	7.38037	5.64569
3	148927323	148931381	-1	ENSMUSG00000070342	Gm10287	5.8157	1.53178	0.99533	0.534271	0.593154	1	lncRNA	predicted gene 10287	0	0.248685	0.437953	0.27486	0	0.204846	0.169487	0.110024	0.158717	0	0.118346	0.10645	0	13	19	12	0	6	5	3	5	0	4	4	0	11.5541	17.2728	12.2857	0	6.89895	5.71237	3.20512	5.24656	0	4.36495	3.24788
17	34094633	34109635	-1	ENSMUSG00000079553	Kifc1	47.3593	1.5282	0.519613	1.01653	0.309379	1	protein coding	kinesin family member C1	2.88044	4.31524	5.16378	4.79628	1.6233	0.337664	0.882675	0.738351	3.76133	4.39512	1.51703	3.19851	86	122	118	109	13	4	4	8	62	71	29	67	73.2303	85.8581	87.3971	91.9053	24.6323	4.5684	11.3884	9.01529	53.0102	61.3009	24.2732	41.732
1	175708147	175741055	1	ENSMUSG00000039748	Exo1	72.4706	1.52528	0.607832	0.864181	0.387488	1	protein coding	exonuclease 1	2.94039	9.93382	2.50956	4.73318	1.06884	0.554092	3.23815	2.53321	3.15521	7.6663	0.39001	2.03146	42	114	94	63	40	32	30	37	33	69	26	54	93.883	248.261	53.2401	113.801	19.9744	10.0379	58.7063	39.6947	56.103	134.868	7.73762	33.3402
15	34238174	34284448	1	ENSMUSG00000022257	Laptm4b	12.5773	1.52139	0.677488	0.769598	0.441538	1	protein coding	lysosomal-associated protein transmembrane 4B	1.84504	1.95494	0.839669	1.30228	0.586351	0.5401	0	0.330067	0.793429	2.37678	1.2455	0.603292	50	45	16	25	10	6	0	1	11	12	3	10	32.528	26.9771	9.83597	17.2889	6.05044	5.40263	0	2.85583	7.78995	23.0877	13.644	5.46709
3	83743579	83749074	-1	ENSMUSG00000027995	Tlr2	58.6103	1.51991	0.298121	1.74396	0.0811664	1	protein coding	toll-like receptor 2	3.33622	2.25466	2.27616	3.92552	0.884415	1.87006	1.57833	1.25628	1.9145	1.17177	1.37785	1.96848	150	86	72	125	25	40	34	25	44	26	34	54	144.48	76.4263	65.4957	128.015	22.4174	45.9501	38.811	26.7003	46.1723	27.96	37.0769	43.8188
14	14475200	14505240	1	ENSMUSG00000025279	Dnase1l3	126.149	1.51924	0.380043	1.36627	0.171853	1	protein coding	deoxyribonuclease 1-like 3	4.75293	4.29399	4.45026	3.5111	1.82154	0.665365	1.4056	0.994184	3.25325	3.66136	2.65712	2.63906	346	265	228	181	69	23	35	32	121	103	106	103	309.045	218.54	192.267	171.916	69.3232	24.5471	51.8952	31.7254	117.802	131.173	107.355	88.204
4	126450728	126487696	1	ENSMUSG00000042489	Clspn	168.091	1.51869	0.384837	1.34783	0.177714	1	protein coding	claspin	4.55802	6.44006	11.6916	9.72086	1.1695	2.3132	1.78015	3.21083	4.2796	7.60631	5.55827	4.80445	279	415	384	346	28	39	33	30	169	281	156	208	220.117	243.432	375.156	353.505	33.0565	63.3827	48.8136	76.0983	115.095	202.392	166.789	119.261
4	43058953	43264871	1	ENSMUSG00000028456	Unc13b	41.0301	1.51864	0.575234	0.901623	0.367257	1	protein coding	unc-13 homolog B	1.61025	1.82689	0.442331	1.48613	0.320276	0.882304	0.361432	0.336785	2.04977	0.396481	0.873038	0.348367	83	42	34	20	18	44	10	19	52	17	31	33	104.411	92.7206	19.0572	72.5641	12.155	32.4603	13.3072	10.7174	74.0174	14.165	35.1751	11.611
15	78283756	78290107	-1	ENSMUSG00000044986	Tst	7.74632	1.51682	0.867814	0.595546	0.551479	1	protein coding	thiosulfate sulfurtransferase, mitochondrial	0.871058	0.658433	0.182996	0.850899	0.081882	0.836801	0.590663	0.61964	0.402855	0	0.234404	0.042172	13	10	5	9	2	6	11	5	8	0	5	1	21.8681	12.9385	3.05256	16.0862	1.20317	11.9197	8.41993	7.63453	5.63232	0	3.65661	0.544205
17	44806874	45125684	-1	ENSMUSG00000039153	Runx2	27.8344	1.51501	0.987697	0.521427	0.602069	1	protein coding	runt related transcription factor 2	0.109605	0.944379	0.706963	2.95591	0.034875	0.366158	0.271046	0.148707	0.234077	0.840404	0	3.51228	11	59	38	54	2	9	13	6	12	14	0	12	5.7218	38.5885	24.5221	116.2	1.0656	10.8455	8.03434	3.80989	6.80512	24.173	0	94.2473
8	112038429	112064809	-1	ENSMUSG00000012519	Mlkl	14.0409	1.51032	0.62199	0.820471	0.411948	1	protein coding	mixed lineage kinase domain-like	2.1246	1.42745	0.955153	0.648746	0.561772	0.497171	0.882984	0.478447	0.898368	1.21585	0	0.867142	24	22	19	13	10	4	12	6	13	17	0	15	48.8499	25.6896	14.5921	11.2324	7.56004	6.48592	11.5277	5.39882	11.5031	15.403	0	10.2484
6	127102125	127129156	-1	ENSMUSG00000000184	Ccnd2	1092.96	1.50506	0.387804	1.30236	0.192794	1	protein coding	cyclin D2	32.9543	30.483	31.3547	29.968	12.0409	12.1475	8.56331	8.55103	22.4547	35.9619	12.3838	14.7735	2752	2433	1616	1492	695	488	252	253	1080	1290	545	840	2530.2	1831.94	1599.58	1732.66	541.106	529.19	373.328	322.212	960.121	1521.34	590.81	583.048
GL456212.1	128555	150452	-1	ENSMUSG00000079808		53.7181	1.50495	0.381798	1.32255	0.185987	1	protein coding		5.56104	4.57906	4.75915	2.79798	2.75345	3.18627	1.49921	1.2138	1.85293	4.20702	1.06889	2.37812	151	106	91	54	47	41	20	15	26	57	16	40	145.653	94.2217	82.9454	55.3705	42.1644	47.0169	22.7947	16.0152	27.3009	61.2809	17.4282	32.4254
11	68936473	68942490	1	ENSMUSG00000020897	Aurkb	81.1201	1.50234	0.46868	1.07183	0.283797	1	protein coding	aurora kinase B	7.12263	9.70214	9.54321	8.03012	1.64098	2.74764	1.62967	1.63697	6.18243	10.9046	2.86953	6.99848	152	171	148	147	26	19	13	18	86	119	44	80	150.125	160.063	133.649	127.452	20.244	32.859	19.5038	16.933	72.5686	126.638	37.5815	75.8221
4	134195631	134201154	1	ENSMUSG00000028832	Stmn1	246.846	1.50014	0.588901	0.84927	0.395731	1	protein coding	stathmin 1	24.5549	46.2899	55.5938	49.9897	7.42389	8.30575	7.30217	8.7765	30.5622	59.418	17.4461	34.0708	333	535	527	481	50	54	48	52	213	398	129	284	315.018	464.32	473.462	482.781	55.7261	60.1609	53.1748	55.2818	218.595	419.742	139.07	224.815
8	76438228	76439824	-1	ENSMUSG00000101431	Gm7901	8.92965	1.4948	0.652064	0.758825	0.447957	1	processed pseudogene	predicted gene 7901	1.20667	0.646779	1.04488	0.710702	0.363935	0.640226	0	0.303843	0.801006	1.0037	0.335441	0.296536	27	12	16	11	5	7	0	3	9	11	4	4	26.0542	10.6633	14.5942	11.2822	4.48481	8.01577	0	3.20105	9.44956	11.8192	4.35233	3.23924
X	135069733	135073091	-1	ENSMUSG00000051579	Tceal8	7.72817	1.49256	0.977898	0.503689	0.61448	1	protein coding	transcription elongation factor A (SII)-like 8	0.300716	2.20175	1.05831	1.10333	0	0.516517	0.124551	0.94682	0.234816	2.11029	0.653092	0	5	20	9	13	0	5	1	7	2	18	6	0	4.58236	26.261	10.7153	12.6605	0	4.46577	1.07767	7.08076	1.99267	17.7181	6.18382	0
13	100915158	100923078	-1	ENSMUSG00000041431	Ccnb1	73.0047	1.48946	0.834359	0.586624	0.557456	1	protein coding	cyclin B1	3.77743	10.9727	12.2255	5.88543	1.69448	3.35663	0.134711	0.444746	8.13511	10.6265	4.45429	2.7616	92	156	172	126	21	16	2	4	78	124	45	59	77.535	176.273	166.685	91.0161	20.4208	39.0325	1.56956	4.47881	92.9628	120.162	56.7934	29.1279
13	23940996	23941392	1	ENSMUSG00000069266	H4c2	123.304	1.48799	0.4837	1.00887	0.313037	1	protein coding	H4 clustered histone 2	74.0845	99.2479	106.909	78.9822	18.8555	11.3396	14.0115	28.5081	81.6508	111.786	38.2352	60.5066	229	267	232	174	37	18	22	40	131	176	68	119	226.334	237.782	217.77	181.916	33.3797	20.0608	24.4329	42.7014	138.831	188.598	72.8615	94.9757
17	57665691	57790527	1	ENSMUSG00000004730	Adgre1	47.5051	1.48785	0.509293	0.957893	0.338117	1	protein coding	adhesion G protein-coupled receptor E1	3.31438	3.45107	2.13665	1.39574	1.73623	0.606244	0.804133	0.325759	1.08857	3.09899	1.887	1.18166	65	118	73	48	53	14	18	7	26	55	26	35	129.796	105.785	55.597	41.1603	39.7966	13.4706	17.8811	6.26091	23.7406	66.8685	45.9178	23.7866
7	79309944	79347896	1	ENSMUSG00000046591	Ticrr	73.3693	1.48467	0.392853	1.23372	0.217308	1	protein coding	TOPBP1-interacting checkpoint and replication regulator	1.24644	2.10957	2.43689	2.19519	0.98412	0.421723	0.379827	0.564834	1.41524	1.83047	0.685782	1.67476	128	170	183	150	22	18	13	28	79	76	31	93	103.904	137.646	134.976	137.799	48.016	19.9465	17.9784	23.1079	65.7003	84.0744	35.5219	71.7615
2	135500931	135856513	1	ENSMUSG00000039943	Plcb4	10.8424	1.47997	0.906502	0.52948	0.596472	1	protein coding	phospholipase C, beta 4	0.579647	0.798961	1.27866	2.35581	0	0.958448	0.836329	0.255304	1.47622	1.49732	0	0.146129	11	28	22	31	0	4	8	3	14	8	0	3	11.2651	12.1536	16.5114	34.4764	0	10.5686	9.22896	2.43505	15.9771	16.0334	0	1.45977
1	74327406	74344781	-1	ENSMUSG00000006301	Tmbim1	46.7689	1.47777	0.548755	0.870643	0.383949	1	protein coding	transmembrane BAX inhibitor motif containing 1	2.29434	4.02824	1.62117	4.93388	1.4154	1.18835	0.157002	1.66139	3.35529	2.76978	1.64256	1.13217	88	116	40	44	26	18	13	19	42	36	40	17	72.9777	100.29	34.2625	118.177	26.3506	21.4465	2.83558	25.9348	59.4345	48.5421	32.4641	18.5107
5	30263200	30278615	-1	ENSMUSG00000025747	Tyms	73.8276	1.47697	0.666849	0.715259	0.474449	1	protein coding	thymidylate synthase	5.58427	9.07842	12.0319	8.79276	1.78168	1.96785	0.679164	0.437807	5.74513	16.0971	2.41409	7.49531	123	133	136	95	32	17	17	9	47	58	28	44	104.181	132.569	149.147	123.527	19.455	20.8303	7.19454	4.00853	59.6895	165.467	27.985	71.8771
7	96730793	96958153	1	ENSMUSG00000004508	Gab2	19.1892	1.47025	0.65626	0.716561	0.473645	1	protein coding	growth factor receptor bound protein 2-associated protein 2	0.533351	0.431877	0.312013	0.605519	0.133178	0.198357	0.043761	0.023662	0.348032	0.466849	0.614814	0.171747	51	35	21	41	8	9	2	1	17	22	14	10	45.7753	29.0127	17.793	39.1343	6.69004	9.65928	2.13262	0.996657	16.6346	22.0768	32.7877	7.57679
18	60727045	60793214	-1	ENSMUSG00000043079	Synpo	11.5657	1.4694	0.610124	0.769358	0.441681	1	protein coding	synaptopodin	0.215348	0.733247	0.391333	0.349819	0.159344	0.226409	0.170401	0.26064	0.518844	0.232065	0.119867	0.02417	16	45	21	19	7	5	4	8	18	7	3	1	13.2082	35.2015	15.9479	16.1568	5.72023	7.87906	5.93441	7.8455	17.722	7.84242	4.56826	0.761992
18	37884653	37974926	1	ENSMUSG00000104063	Pcdhgb7	19.6212	1.46901	0.497567	0.942605	0.345883	1	protein coding	protocadherin gamma subfamily B, 7	0.524806	0.929448	0.492821	0.509457	0.097453	0.120385	0.421237	0.34433	0.21787	0.295051	0.611043	0.432276	38	57	25	26	4	4	15	11	8	11	24	19	36.5707	50.6478	22.7151	26.6081	3.58581	4.59967	17.1379	11.7503	8.39188	11.831	26.1892	15.4268
8	84682136	84696826	1	ENSMUSG00000005470	Asf1b	71.4438	1.46883	0.581457	0.806302	0.420069	1	protein coding	anti-silencing function 1B histone chaperone	4.64609	17.3847	21.9972	12.0335	5.81966	2.38458	2.8491	3.0855	7.16229	20.3059	1.22205	13.351	65	135	135	91	35	25	26	15	40	70	17	92	54.8492	160.642	172.547	106.976	40.2122	15.9725	19.0983	17.8767	47.0879	132.082	8.96439	81.0169
18	35399449	35632833	-1	ENSMUSG00000024357	Sil1	209.408	1.4672	0.27941	1.67209	0.0945066	1	protein coding	endoplasmic reticulum chaperone SIL1 homolog (S. cerevisiae)	27.8592	34.4995	18.8629	15.0694	16.7931	12.3509	8.09131	11.8565	15.6372	15.5058	12.0968	9.85119	642	428	256	253	117	71	91	121	156	181	149	131	515.418	499.591	231.878	209.942	181.845	129.65	84.9993	107.653	161.111	158.062	139.063	93.6825
3	98220486	98247306	-1	ENSMUSG00000053398	Phgdh	582.997	1.46628	0.285048	1.63578	0.101885	1	protein coding	3-phosphoglycerate dehydrogenase	108.175	83.7843	88.4099	83.5673	56.0965	23.6427	28.4837	47.4236	60.8084	88.9182	38.3706	42.0105	1332	1081	949	796	367	209	220	276	466	577	318	386	1485.63	900.629	806.824	864.206	450.908	184.351	222.081	319.59	465.056	672.715	327.461	296.513
18	58011750	58079893	1	ENSMUSG00000024597	Slc12a2	199.782	1.46588	0.316477	1.47208	0.140998	1	protein coding	solute carrier family 12, member 2	6.20089	4.89796	3.35268	2.88648	2.17666	1.70658	2.26101	1.87475	3.281	3.70416	1.13428	2.78018	628	418	239	207	138	82	108	82	164	182	61	170	597.405	369.352	214.618	209.409	122.739	93.2868	123.687	88.6415	176.034	196.628	67.9023	137.679
18	46874943	46923893	1	ENSMUSG00000024480	Ap3s1	61.2806	1.46564	0.383147	1.2153	0.22425	1	protein coding	adaptor-related protein complex 3, sigma 1 subunit	7.67989	6.49587	6.51528	5.58811	1.43909	2.39299	1.48557	3.09801	4.95543	3.56563	5.96998	4.70785	161	112	96	83	19	24	15	29	52	37	69	56	153.714	101.903	86.6462	84.2239	16.8587	27.1756	16.8832	30.6057	55.2351	39.322	74.2472	48.5528
3	84573499	84611882	1	ENSMUSG00000056498	Tmem154	670.41	1.46464	0.269913	1.72145	0.0851698	1	protein coding	transmembrane protein 154	47.4749	42.6795	43.6218	38.8027	19.9032	13.7343	11.5851	17.7875	38.3677	31.0689	19.5146	30.0866	2135	1446	1224	1081	425	200	207	272	558	485	357	514	1591.97	1120.21	971.926	979.817	390.636	261.31	220.586	292.729	716.493	574.035	406.612	518.588
3	14706787	14728062	1	ENSMUSG00000027555	Car13	23.4721	1.46345	0.524767	0.883151	0.377155	1	protein coding	carbonic anhydrase 13	0.776666	2.63914	1.69885	1.43388	0.142466	0.689533	0.435742	0.674278	0.759374	2.05616	1.03272	0.831227	26	75	40	34	3	11	7	10	13	34	19	17	25.0622	66.659	36.425	34.8427	2.69075	12.6247	7.98398	10.6784	13.6464	36.558	20.7071	13.7874
18	56642759	56706023	-1	ENSMUSG00000053644	Aldh7a1	63.9818	1.45988	0.463956	0.991207	0.321584	1	protein coding	aldehyde dehydrogenase family 7, member A1	4.39281	11.0346	3.90387	4.11492	1.536	3.34559	1.26022	6.07976	1.2859	6.727	2.66631	2.52656	131	159	85	100	35	37	11	29	26	47	45	46	103.467	203.435	61.0958	72.9846	21.1752	44.7107	16.8543	70.2789	16.8671	87.3013	39.0228	30.589
15	97142006	97145168	-1	ENSMUSG00000048218	Amigo2	141.379	1.45874	0.30169	1.52058	0.128365	1	protein coding	adhesion molecule with Ig like domain 2	8.41045	6.02154	6.00871	8.95179	4.32109	3.46828	2.45292	3.23897	7.22124	3.85102	1.9971	4.80543	351	216	180	268	114	73	50	62	156	80	49	127	346.404	194.125	164.439	277.643	104.168	81.0508	57.3657	65.4713	165.635	87.394	51.1109	101.736
14	54457978	54461663	1	ENSMUSG00000076928	Trac	6.31705	1.45746	1.07807	0.42433	0.671325	1	TR C gene	T cell receptor alpha constant	1.38313	2.79148	0.862221	2.07298	0	0.179173	0	1.3238	2.81806	2.94574	0	0.700743	16	11	7	17	0	1	0	2	9	8	0	5	10.4785	16.5531	4.34023	11.8261	0	0.77017	0	4.92197	11.8894	12.2962	0	2.7288
8	71068805	71074133	1	ENSMUSG00000049988	Lrrc25	14.1229	1.45546	0.526046	0.865811	0.386594	1	protein coding	leucine rich repeat containing 25	1.47254	1.1702	1.41358	0.987392	0.233987	0.925609	0.536232	0.332108	1.29527	1.489	0.334512	0.601874	40	27	27	19	4	12	7	4	18	5	5	10	34.3751	21.3819	21.9259	17.3572	3.19703	12.2598	7.10779	3.80484	16.8389	19.1519	4.85219	7.22205
2	122065230	122095821	1	ENSMUSG00000027227	Sord	42.0389	1.45499	0.385457	1.1804	0.237842	1	protein coding	sorbitol dehydrogenase	2.09743	3.80791	1.94659	3.24908	1.85253	0.978244	0.789287	0.789139	1.19631	2.53617	2.01449	1.23992	72	111	47	79	40	16	13	12	21	43	38	26	69.398	98.6541	42.795	80.9529	35.8759	18.3648	14.8286	12.8142	22.0434	46.2358	41.4166	21.0878
12	114575863	114576295	-1	ENSMUSG00000102888	Ighv1-11	15.0984	1.45487	0.572927	0.793948	0.427226	1	IG V gene	immunoglobulin heavy variable V1-11	11.8515	23.3945	12.2593	6.29901	5.70572	0.803276	6.39663	3.58374	7.05471	14.384	9.90662	8.27484	29	50	21	11	9	1	8	4	9	18	14	13	28.8218	44.5319	19.8093	11.5354	8.12149	1.10839	8.83288	4.27724	9.55434	19.2737	14.97	10.3439
7	35033595	35091714	1	ENSMUSG00000030494	Rhpn2	15.7586	1.45478	0.668637	0.680154	0.496407	1	protein coding	rhophilin, Rho GTPase binding protein 2	1.24224	1.12241	0.812649	0.34703	0.180631	1.07382	0.213644	0.256572	0.147965	1.09326	0.890172	0.2523	65	50	26	13	5	17	4	5	4	7	7	7	44.7289	31.6334	19.4422	9.40943	3.80676	21.938	4.36798	4.53391	2.967	21.6895	19.9163	4.6696
15	97990470	98030332	1	ENSMUSG00000033065	Pfkm	15.783	1.45104	0.627084	0.719268	0.471976	1	protein coding	phosphofructokinase, muscle	1.00485	0.7712	2.42045	1.36683	1.22592	0.40512	1.60986	0.163322	0.228566	1.56677	0.307294	0.750291	43	28	25	21	9	8	6	3	5	8	7	19	24.4629	14.6956	39.1529	25.6628	17.4682	5.59594	22.2537	1.95134	3.09882	21.0163	4.64851	9.38896
17	44407199	44416700	-1	ENSMUSG00000023961	Enpp4	8.26487	1.45083	0.965573	0.466907	0.640566	1	protein coding	ectonucleotide pyrophosphatase/phosphodiesterase 4	0.338503	0.347182	0.083652	0.270178	0	0.2479	0.523018	0.066565	0.028804	0.232481	0.026852	0.024153	23	20	4	13	0	8	17	2	1	8	1	1	22.1918	17.8155	3.64388	13.3381	0	9.22118	19.4693	2.14167	1.05163	8.39767	1.09385	0.813903
7	48516177	48531344	-1	ENSMUSG00000046179	E2f8	70.377	1.44807	0.599938	0.746865	0.455145	1	protein coding	E2F transcription factor 8	1.97924	3.88808	7.08824	4.32667	0.422225	1.51459	0.350547	0.720286	3.05106	6.3163	1.03682	3.5425	108	182	174	170	14	16	7	2	86	156	30	114	74.9761	115.285	178.411	123.422	9.36155	32.5538	7.5401	13.3909	64.3654	131.835	24.4049	68.9784
4	33031416	33052363	1	ENSMUSG00000028277	Ube2j1	985.179	1.43864	0.232203	1.88902	0.0588895	1	protein coding	ubiquitin-conjugating enzyme E2J 1	72.2367	54.9854	50.4105	50.6548	27.5558	26.0317	24.1202	20.4272	39.2075	45.4427	27.2933	37.9465	2624	1756	1258	1243	604	428	460	481	753	792	613	841	2628.71	1566.18	1218.89	1388.09	586.916	537.487	498.392	364.816	794.565	911.151	617.149	709.798
6	116241183	116307263	1	ENSMUSG00000042213	Zfand4	14.8725	1.43814	0.597823	0.732898	0.463621	1	protein coding	zinc finger, AN1-type domain 4	1.53368	1.28006	2.42953	0.948794	0.575536	0.709552	1.9106	2.42511	0.860503	0.524193	0.073604	0.596564	34	40	20	31	12	2	9	4	20	9	1	17	30.4153	19.87	32.0138	14.169	6.68047	7.984	21.5145	23.603	9.50351	5.72781	0.907004	6.08124
3	96147065	96147592	-1	ENSMUSG00000063954	H2ac19	70.1669	1.43386	0.409001	1.06078	0.28879	1	protein coding	H2A clustered histone 19	27.9919	29.5647	30.1577	35.0763	14.79	16.13	12.9394	2.49354	15.9952	11.4659	27.1442	26.0139	142	129	107	126	48	40	33	6	42	29	78	83	139.016	114.893	99.4617	130.824	43.2493	45.0491	37.0052	6.39506	44.3631	31.1204	84.0383	66.5891
10	61484331	61509947	1	ENSMUSG00000020089	Ppa1	208.009	1.4315	0.241964	1.78331	0.0745351	1	protein coding	pyrophosphatase (inorganic) 1	27.576	32.3395	23.5012	26.1215	14.0711	18.743	9.95413	10.4503	21.2612	18.7528	10.2854	14.4076	509	508	305	342	134	94	89	86	163	172	92	157	447.56	410.831	253.437	319.25	133.668	172.599	91.7338	83.2395	192.169	167.698	103.726	120.196
18	75072393	75094334	-1	ENSMUSG00000053846	Lipg	6.54531	1.42987	1.03865	0.413879	0.678963	1	protein coding	lipase, endothelial	0.246079	0.184968	0.381269	0.492204	0	0.220012	0.655413	0	0.204897	0.24735	0	0.042896	13	9	11	20	0	4	12	0	4	7	0	1	10.8325	6.37324	11.1517	16.3159	0	5.49515	16.3822	0	5.023	5.99937	0	0.970613
6	69244872	69245427	-1	ENSMUSG00000076547	Igkv4-70	76.3289	1.42568	0.568612	0.74863	0.45408	1	IG V gene	immunoglobulin kappa chain variable 4-70	39.4128	31.8367	91.7212	81.7911	20.2434	18.6435	11.8051	24.0014	8.2431	15.698	106.756	35.7351	112	79	182	165	37	27	17	31	12	23	174	65	110.89	70.3652	171.103	172.738	33.385	30.0325	18.8423	33.1114	12.7232	24.6363	186.281	51.8393
12	85645801	85686652	1	ENSMUSG00000034271	Jdp2	28.4331	1.42422	0.643334	0.659416	0.509629	1	protein coding	Jun dimerization protein 2	3.65969	2.76982	3.19484	3.13798	1.31425	2.45907	0.096192	0.313021	1.8146	2.37671	4.60414	0.907237	84	54	43	48	19	27	1	3	13	27	18	12	68.1091	40.348	39.5065	43.9768	14.3159	25.9664	1.01649	2.85901	18.8069	24.3713	53.2425	8.67881
7	44856943	44861571	-1	ENSMUSG00000030792	Dkkl1	13.4103	1.42313	0.641775	0.659319	0.509691	1	protein coding	dickkopf-like 1	1.75075	3.06881	4.18747	2.06885	3.76051	1.88312	0.344376	0.708847	1.55308	2.14947	0.240957	0.789787	26	27	26	22	20	7	2	3	6	16	2	7	18.8947	25.9236	30.0279	16.8135	23.7542	11.5312	2.11034	3.75446	9.33435	12.7817	1.61586	4.38131
11	79417386	79421435	-1	ENSMUSG00000078771	Evi2a	612.992	1.42287	0.254336	1.66265	0.0963833	1	protein coding	ecotropic viral integration site 2a	88.6502	62.6033	65.3071	58.6056	48.9944	16.021	35.3077	34.116	43.5364	40.3217	36.7841	46.5476	1538	1014	863	810	519	169	306	303	470	397	408	589	1658.98	917.094	812.068	825.632	536.518	170.115	375.61	313.932	453.987	416.002	428.234	447.732
9	71411629	71499642	-1	ENSMUSG00000041361	Myzap	211.973	1.42214	0.29328	1.43937	0.150045	1	protein coding	myocardial zonula adherens protein	14.2802	14.217	12.4055	11.7025	5.28046	4.92452	4.4819	5.96089	10.5921	13.3999	7.10503	5.33165	455	378	305	287	125	97	82	100	188	191	145	131	489.177	381.199	282.362	301.871	105.872	95.7141	87.1765	100.213	202.064	252.915	151.233	93.8798
3	134918298	134979372	1	ENSMUSG00000045328	Cenpe	319.483	1.41843	0.691783	0.604861	0.545272	1	protein coding	centromere protein E	3.32518	6.4025	7.89587	6.74126	0.721323	0.870025	0.609686	1.15357	5.51235	8.18227	3.99019	4.0408	411	623	687	590	56	51	36	63	348	467	270	304	390.78	588.949	616.562	596.584	49.6165	58.0136	40.6845	66.5336	360.77	529.826	291.381	244.098
12	104180803	104187388	1	ENSMUSG00000066363	Serpina3f	106.961	1.41827	0.475059	0.880462	0.378609	1	protein coding	serine (or cysteine) peptidase inhibitor, clade A, member 3F	10.7868	7.65053	5.92528	3.50166	6.4757	4.62948	1.27601	1.79694	6.93497	5.64079	1.50417	2.95683	352	211	136	81	133	72	20	26	116	91	27	59	339.479	188.045	123.819	82.9867	119.255	82.6009	22.8024	27.7545	121.733	97.8144	29.4149	47.8329
2	102004635	102005097	1	ENSMUSG00000082328	Gm13921	6.49205	1.41736	0.927861	0.449814	0.652845	1	processed pseudogene	predicted gene 13921	1.91187	4.4885	4.60963	3.59375	2.12148	0	4.0891	0	1.35662	3.21141	3.57482	0	8	16	13	10	6	0	8	0	3	7	8	0	7.82413	14.1837	12.0752	10.363	5.38236	0	8.89181	0	3.15778	7.47062	8.55594	0
13	100896182	100912407	-1	ENSMUSG00000045273	Cenph	30.6929	1.41401	0.390548	1.06008	0.289107	1	protein coding	centromere protein H	3.60511	3.95364	5.23449	4.32428	2.15048	2.00406	1.14046	1.3513	3.87074	3.99994	2.28364	1.17418	60	56	60	51	19	16	8	10	33	33	21	12	56.4483	48.4552	54.4585	50.987	19.7082	17.8042	10.1395	10.384	33.7522	34.5087	22.2182	9.45027
4	12153409	12172015	-1	ENSMUSG00000028218	Cibar1	31.2582	1.41322	0.434683	0.950627	0.341794	1	protein coding	CBY1 interacting BAR domain containing 1	2.05916	3.78131	3.93478	3.2442	1.94796	2.57414	0.289799	0.963868	2.04246	2.69362	1.40029	1.74363	44	69	50	43	21	25	4	14	27	35	15	20	43.6315	62.7137	55.3973	51.7642	24.1585	30.9473	3.48668	10.0232	24.1013	31.4475	18.4365	18.9908
3	94840367	94852069	1	ENSMUSG00000068874	Selenbp1	12.3176	1.41188	0.548093	0.751483	0.452362	1	protein coding	selenium binding protein 1	0.998012	1.41918	1.71535	1.07244	0.557436	0.593929	0.132248	0.471477	0.243787	1.18406	0.607686	1.78628	24	29	29	17	7	7	1	5	3	14	8	14	20.7169	23.0588	23.6592	16.7638	6.77271	7.21888	1.55877	4.80318	2.81822	13.5427	7.83822	19.0597
1	60448778	60520317	1	ENSMUSG00000026782	Abi2	56.1682	1.40768	0.429538	0.94911	0.342565	1	protein coding	abl interactor 2	2.87032	3.55775	1.83283	2.94486	0.481827	2.9604	0.653151	1.84271	1.10084	2.42692	1.291	1.76469	61	126	77	59	27	53	16	25	30	59	38	48	121.015	117.407	51.3439	93.4942	11.8899	70.817	15.636	38.1279	25.8469	56.3774	33.8208	38.2432
8	117615424	117648194	-1	ENSMUSG00000014633	Cmc2	33.5134	1.40621	0.369925	1.09809	0.272163	1	protein coding	COX assembly mitochondrial protein 2	8.09342	6.12465	6.8659	14.0667	6.97914	4.02426	2.05341	3.64542	6.10344	3.98911	5.31213	5.15449	63	56	63	56	36	18	6	21	37	22	11	25	66.5446	39.416	37.5091	87.0934	33.5862	18.7736	9.58655	14.7099	27.9467	18.0716	27.1393	21.7844
9	26911006	26918632	1	ENSMUSG00000035443	Thyn1	29.0213	1.40567	0.50118	0.809433	0.418266	1	protein coding	thymocyte nuclear protein 1	8.32983	7.06686	5.29732	5.25946	3.71434	2.80727	4.66789	0.993464	6.21611	5.548	0.677602	4.40119	83	59	34	36	22	13	22	4	31	27	4	24	77.4643	51.4402	32.7326	36.8315	20.2174	14.8125	24.6486	4.53418	32.1929	28.4278	3.91552	21.0385
6	69477238	69477770	-1	ENSMUSG00000095633	Igkv4-58	21.6912	1.40551	0.599036	0.676933	0.498448	1	IG V gene	immunoglobulin kappa variable 4-58	4.17263	18.4738	44.1324	25.8975	12.2063	4.64495	8.01317	6.90205	35.4643	7.69427	8.1904	7.97538	7	41	66	36	20	6	7	8	47	10	8	13	9.17684	31.8017	64.4913	42.89	15.7126	5.79622	10.0068	7.44978	43.4362	9.3238	11.1928	9.01603
8	71986899	71990100	-1	ENSMUSG00000046718	Bst2	59.5825	1.40358	0.31773	1.2702	0.204014	1	protein coding	bone marrow stromal cell antigen 2	13.9121	17.5433	9.68821	16.8808	6.48081	5.33999	8.62578	8.44052	6.92875	15.973	7.16162	5.74921	129	139	63	111	38	24	39	35	33	45	37	33	120.248	118.688	55.6401	109.873	32.7864	26.1882	42.334	35.8043	33.3516	76.0703	38.4633	25.543
6	70411936	70412460	-1	ENSMUSG00000096844	Igkv6-14	38.2452	1.40253	0.626526	0.642472	0.520567	1	IG V gene	immunoglobulin kappa variable 6-14	18.0379	85.4571	11.9432	22.2934	14.9049	22.2792	9.8756	6.41233	11.2184	53.9056	22.4235	6.61766	43	179	20	38	23	27	12	7	14	66	31	10	42.7601	159.429	18.873	39.8647	20.7534	29.913	13.2423	7.48649	14.8623	70.6574	33.1463	7.9549
11	74274182	74501741	-1	ENSMUSG00000038807	Rap1gap2	154.053	1.40032	0.325224	1.2309	0.218362	1	protein coding	RAP1 GTPase activating protein 2	5.8853	8.83748	5.77199	4.4566	2.04081	1.95523	6.32023	2.92356	4.38694	4.69428	1.884	3.51241	305	247	202	172	102	92	94	83	87	111	80	136	307.976	361.982	200.693	175.616	62.5073	58.0532	187.796	75.0828	127.846	135.35	61.2603	94.4784
2	131751848	131780349	1	ENSMUSG00000079037	Prnp	24.5523	1.39982	0.486482	0.821865	0.411154	1	protein coding	prion protein	1.86536	1.63848	1.84314	1.83003	0.351792	1.82702	0.461023	0.780733	1.05092	1.53585	1.55278	0.362151	59	44	41	41	7	14	7	11	17	24	27	7	53.7621	36.9628	35.2964	39.7176	5.93441	29.8771	7.54468	11.1015	16.8678	24.3896	27.8082	5.36515
13	24935828	24945906	-1	ENSMUSG00000006715	Gmnn	73.0847	1.39691	0.381654	1.03997	0.298353	1	protein coding	geminin	10.9007	15.3207	13.6334	18.1943	5.53594	3.27919	3.94471	4.85201	11.9448	16.5181	8.61661	8.09875	131	157	115	155	42	19	23	26	74	62	40	60	118.546	130.414	98.5137	148.999	35.2374	20.2339	24.3587	25.8962	72.3416	98.9771	58.2264	45.2721
3	67365331	67371259	-1	ENSMUSG00000047557	Lxn	13.6824	1.3969	0.849389	0.467279	0.6403	1	protein coding	latexin	2.4982	3.17755	0.988143	1.86035	1.74524	0	0.860619	0	2.03096	3.18889	0.250773	1.57963	36	39	10	19	12	0	6	0	15	18	2	14	33.0551	32.909	8.68739	18.5361	13.5159	0	6.46587	0	14.9654	23.2483	2.06177	10.7434
10	18457587	18619697	-1	ENSMUSG00000019852	Arfgef3	18.1451	1.39674	0.910192	0.435885	0.66292	1	protein coding	ARFGEF family member 3	0.383995	0.173354	0.346588	0.018364	0	0.118906	0.099363	0.029461	0.499792	0.209108	0.055457	0.049878	56	28	25	3	0	13	5	3	27	14	7	7	61.6701	21.7919	36.9848	2.22093	0	10.8351	9.06108	2.32054	44.7009	18.5038	5.53421	4.11752
10	75607064	75609248	-1	ENSMUSG00000001666	Ddt	142.579	1.39514	0.274465	1.43969	0.149955	1	protein coding	D-dopachrome tautomerase	35.9803	54.9624	50.0622	40.9582	13.5521	14.9523	19.0613	22.3257	28.0922	45.798	25.5481	27.1341	250	329	245	203	60	51	64	70	101	159	100	118	244.284	292.083	225.84	209.404	53.8536	57.5996	73.4834	74.3901	106.216	171.324	107.78	94.6943
8	83058261	83129851	-1	ENSMUSG00000031712	Il15	12.4338	1.39353	0.822224	0.478621	0.632209	1	protein coding	interleukin 15	4.01298	1.41201	1.28292	1.44885	0.421372	0.154087	0.231349	1.02987	1.19831	1.81816	6.69814	0.911342	55	20	15	14	2	2	1	9	4	15	5	5	41.7774	11.506	8.87423	11.3582	2.56755	0.910168	1.36756	5.26181	6.94734	10.4291	43.329	4.87679
8	106311953	106312832	-1	ENSMUSG00000110686	Gm45855	11.5817	1.39315	0.432213	0.909618	0.363024	1	processed pseudogene	predicted gene 45855	2.15627	2.71342	1.98106	2.59968	0.815682	0.754961	1.04026	1.36573	1.67137	1.93548	1.33547	1.51127	23	25	15	20	6	4	5	7	9	10	8	10	22.3112	22.2414	13.78	20.6062	5.39242	4.55612	5.66446	7.46462	9.4732	10.7401	8.67581	8.07432
19	40209617	40260286	-1	ENSMUSG00000055044	Pdlim1	193.725	1.39182	0.217062	1.8051	0.0710596	1	protein coding	PDZ and LIM domain 1 (elfin)	19.8153	23.5874	28.3572	19.1388	12.478	12.8192	7.74536	7.69789	14.7908	14.6022	12.0642	15.847	311	382	320	219	178	120	103	86	152	131	133	130	364.88	339.97	346.954	265.385	134.63	133.934	80.9835	69.6776	151.676	148.172	138.353	150.083
4	128777373	128805121	1	ENSMUSG00000041000	Trim62	46.2606	1.39038	0.475532	0.820929	0.411687	1	protein coding	tripartite motif-containing 62	2.02411	2.58042	0.936534	1.83917	0.794391	0.397122	0.847371	0.557046	0.810077	2.64066	1.37214	0.806516	115	120	37	74	27	10	20	14	21	74	37	27	105.316	105.09	32.3775	72.0603	24.1921	11.7237	25.0346	14.2244	23.4727	75.7034	44.3619	21.5701
14	86892803	87378671	-1	ENSMUSG00000022021	Diaph3	118.436	1.38997	0.422323	0.923402	0.355798	1	protein coding	diaphanous related formin 3	3.52578	4.55678	9.29601	6.82314	1.73277	4.47651	1.02057	1.16526	5.76695	4.30113	2.00352	5.01112	189	224	209	191	57	45	24	31	109	134	53	162	154.113	155.902	269.985	224.585	44.3305	111.021	25.3297	24.9969	140.38	103.588	54.4162	112.589
11	118283577	118292918	-1	ENSMUSG00000033880	Lgals3bp	153.274	1.38856	0.316991	1.22577	0.220285	1	protein coding	lectin, galactoside-binding, soluble, 3 binding protein	14.9586	12.6561	8.11432	7.43838	6.70201	6.00441	5.49896	4.05303	4.60469	11.4017	4.60629	6.47515	432	365	185	179	117	82	61	61	80	123	86	130	434.401	287.679	156.571	162.664	113.916	98.935	90.6746	57.7643	74.4691	182.436	83.1191	96.6559
11	120653620	120655245	1	ENSMUSG00000078249	Hmga1b	11.4674	1.38762	0.630279	0.615001	0.538554	1	protein coding	high mobility group AT-hook 1B	0.986979	1.18512	0.281263	1.96698	0.32538	0.584014	0.12322	0.438598	0.880574	0.892303	0.76585	0.959874	22	23	4	32	5	6	1	4	10	10	10	13	21.2367	20.4467	3.64968	32.8327	4.48664	6.87444	1.13884	4.27002	10.5037	10.7496	10.8864	10.5328
14	101967393	102172146	1	ENSMUSG00000033060	Lmo7	174.438	1.38642	0.656208	0.588875	0.555945	1	protein coding	LIM domain only 7	6.63601	10.6245	11.0804	6.86352	1.41741	3.46781	1.32371	1.01826	12.5443	10.4099	3.0786	4.52888	424	521	320	244	38	48	19	25	241	310	82	105	286.445	358.967	317.796	223.097	35.8104	84.9317	32.4438	21.5712	301.547	247.584	82.573	100.486
11	78427187	78432563	1	ENSMUSG00000001105	Ift20	264.414	1.38636	0.254702	1.51689	0.129295	1	protein coding	intraflagellar transport 20	83.104	58.4819	67.5607	75.7279	31.3164	32.263	46.6714	23.2165	54.6788	57.7019	33.2805	37.3773	642	384	360	392	157	113	171	102	244	251	159	180	647.146	356.461	349.569	444.068	142.735	142.549	206.365	88.7274	237.124	247.578	161.035	149.612
1	36569274	36578510	-1	ENSMUSG00000109510	Gm42417	16.5232	1.38595	2.29002	0.168536	0.866162	1	protein coding	predicted gene, 42417	0.51761	3.64946	2.08386	0	0	0	0	3.50929	0	2.96626	0	0.608766	17	17	48	0	0	0	0	51	0	48	0	12	12.1086	68.3073	32.2991	0	0	0	0	40.2385	0	38.134	0	7.19067
10	43616110	43619083	-1	ENSMUSG00000111377	Gm40634	9.2752	1.38306	0.623059	0.614808	0.538681	1	lncRNA	predicted gene, 40634	0.871389	0.533549	0.693933	0.688876	0.221571	0.146126	0.870715	0.786298	0.13628	0.634711	0.190098	0.228021	25	13	14	14	4	2	12	10	2	9	3	4	24.1103	11.5551	12.7575	14.3531	3.58825	2.29402	13.6795	10.6772	2.09989	9.67626	3.26827	3.24297
1	153280573	153289979	-1	ENSMUSG00000073538	E330020D12Rik	89.9786	1.38248	0.238298	1.60505	0.108482	1	lncRNA	Riken cDNA E330020D12 gene	5.17352	8.99276	9.09105	8.96371	3.93134	3.54692	2.88924	3.15415	4.87048	6.21863	5.3796	4.29299	129	170	160	157	61	45	39	35	70	79	73	65	126.402	171.977	147.584	164.918	56.2195	49.1698	40.0826	37.8208	66.2697	83.715	81.6709	53.9145
3	103739917	103761934	1	ENSMUSG00000044165	Bcl2l15	10.7733	1.38179	0.501095	0.761912	0.446113	1	protein coding	BCLl2-like 15	1.85993	2.85079	2.98371	1.83642	0.67598	1.88267	1.95683	0.582561	1.34211	1.29916	1.72681	1.27433	24	28	17	10	5	9	9	7	5	5	7	6	17.7566	21.4626	19.0688	13.3012	3.80557	10.2745	10.166	2.74997	7.18906	6.88508	10.3205	6.30038
4	148237257	148244939	-1	ENSMUSG00000029001	Fbxo44	14.5668	1.38119	0.484613	0.786596	0.431519	1	protein coding	F-box protein 44	2.05577	2.77016	1.57976	1.50334	1.63962	1.70484	0.630446	1.41544	0.791039	0.809284	1.14187	0.458443	33	48	22	24	19	16	3	12	5	3	10	6	32.0365	33.7898	16.3576	17.6417	14.9552	15.0742	5.57858	10.8253	6.86505	6.94884	11.057	3.67227
9	66853368	66856798	1	ENSMUSG00000036781	Rps27l	111.095	1.38111	0.270547	1.40865	0.15894	1	protein coding	ribosomal protein S27-like	52.275	54.8625	52.3931	44.1735	19.2327	29.6469	25.0121	14.2556	36.1425	43.7727	26.0026	30.8029	251	225	170	146	57	69	59	30	89	102	69	93	241.303	198.223	160.695	153.547	51.9622	77.6475	65.5577	32.2948	92.91	111.33	74.5819	73.0866
9	15621034	15654657	1	ENSMUSG00000043885	Slc36a4	81.0796	1.379	0.416437	0.910106	0.362767	1	protein coding	solute carrier family 36 (proton/amino acid symporter), member 4	1.93729	3.33989	1.78476	1.25122	0.626852	0.933728	0.350194	1.02467	2.37529	1.40359	0.826926	1.88885	175	172	100	90	40	45	17	46	61	61	46	80	158.944	214.482	97.2942	77.303	30.1018	43.466	16.3141	41.2583	108.528	63.4498	42.1566	79.657
9	21499978	21504124	-1	ENSMUSG00000032182	Yipf2	89.4852	1.37863	0.245647	1.54138	0.123225	1	protein coding	Yip1 domain family, member 2	8.45993	6.1807	6.02097	5.73266	2.83579	3.19871	4.60661	4.33235	4.32911	3.4125	2.66591	4.77076	250	156	125	121	55	44	60	56	67	47	40	87	237.616	135.881	112.366	121.249	46.6188	50.9758	73.4677	59.719	67.7149	52.8108	46.5269	68.8771
8	124958130	125072463	1	ENSMUSG00000089704	Galnt2	437.797	1.377	0.223639	1.68574	0.0918457	1	protein coding	polypeptide N-acetylgalactosaminyltransferase 2	20.6997	14.7483	12.6185	13.4413	8.46276	5.74857	7.17613	9.02785	9.78289	10.7522	8.27362	11.3093	1138	783	556	596	333	171	215	250	313	332	284	344	1211.04	675.376	490.525	592.174	289.791	190.825	238.391	259.214	318.741	346.604	300.774	340.103
9	44245991	44247374	1	ENSMUSG00000049932	H2ax	363.128	1.37674	0.496864	0.758238	0.448308	1	protein coding	H2A.X variant histone	29.216	46.3346	50.6638	48.4415	10.7718	12.0894	7.82095	11.0461	40.3143	49.0372	20.6523	37.2555	549	740	669	645	127	109	71	92	388	456	214	429	530.433	657.947	611.179	662.296	113.994	124.749	80.7789	98.1911	407.705	490.102	232.803	347.361
4	44092632	44109311	1	ENSMUSG00000087326	Gm12503	9.63746	1.37572	0.583072	0.64438	0.519329	1	lncRNA	predicted gene 12503	0.427569	0.302418	0.668484	0.45279	0.272047	0.134838	0.223141	0.483062	0.585549	0.129972	0.077917	0.140176	20	12	22	15	8	3	5	10	14	3	2	4	19.2623	10.664	20.0102	15.3607	7.17338	3.44662	5.70803	10.6803	14.6906	3.2262	2.18114	3.24604
10	21000834	21036883	-1	ENSMUSG00000019982	Myb	156.334	1.3721	0.414368	0.897996	0.369188	1	protein coding	myeloblastosis oncogene	4.14663	7.96083	7.83451	10.7313	1.9265	1.72564	3.16102	1.7391	5.04188	9.98959	3.28917	6.13447	194	321	260	371	55	38	65	35	116	240	81	183	185.533	278.802	232.915	361.571	50.4515	43.8084	80.3082	38.1884	125.631	246.272	91.4454	141.085
10	110581300	110623245	1	ENSMUSG00000020185	E2f7	34.2542	1.37111	0.668062	0.555499	0.578553	1	protein coding	E2F transcription factor 7	4.10017	4.62166	2.32401	6.47712	0	1.58563	0.824185	1.18688	4.11166	4.24039	3.431	4.21072	42	80	50	83	0	14	7	6	44	38	29	36	67.3828	59.4505	25.3773	80.1571	0	14.7853	7.69089	9.57268	37.6306	38.3968	35.0363	35.5699
7	120556259	120581535	-1	ENSMUSG00000030878	Cdr2	76.3264	1.37094	0.276817	1.34	0.180245	1	protein coding	cerebellar degeneration-related 2	5.50777	3.36047	4.6269	3.71722	2.38258	2.11615	2.72159	1.96953	3.44531	3.18586	1.57653	2.09606	206	107	125	98	61	38	52	33	68	59	33	49	203.006	96.9488	113.314	103.172	51.3994	44.2548	56.9588	35.6266	70.7191	64.6996	36.1064	39.7114
11	75352541	75361725	1	ENSMUSG00000038217	Tlcd2	20.2358	1.3704	0.574063	0.645233	0.518776	1	protein coding	TLC domain containing 2	4.18078	4.90344	2.291	3.24344	2.06255	0.551512	0.809344	1.22034	2.69667	1.04112	5.29583	2.48909	46	49	20	29	15	3	4	7	17	6	34	20	47.8704	43.9462	17.4298	27.9659	13.8227	3.58299	5.26198	6.85758	17.1955	6.5683	37.6785	14.6497
7	121758662	121769096	1	ENSMUSG00000030867	Plk1	74.3959	1.36855	0.842574	0.437406	0.661817	1	protein coding	polo like kinase 1	3.29461	6.20884	7.87528	5.58149	1.09729	1.25062	0.196097	0.495692	3.86519	12.8847	1.65526	3.29053	105	168	151	126	22	19	3	7	63	140	29	45	94.0656	138.754	149.4	120.002	18.3369	20.2597	3.17909	6.94573	61.4571	202.693	29.3659	48.2915
1	52695445	52766621	-1	ENSMUSG00000041439	Mfsd6	117.473	1.3619	0.301444	1.20055	0.229925	1	protein coding	major facilitator superfamily domain containing 6	6.86183	6.79554	3.83634	2.86112	2.72617	3.68014	2.28194	2.33343	3.0641	4.01543	2.49645	3.02334	239	148	108	96	114	67	74	69	111	83	86	91	322.075	249.661	119.645	101.127	74.8943	98.008	60.8173	53.7516	80.0933	103.846	72.8098	72.9428
5	100827350	100867582	-1	ENSMUSG00000035273	Hpse	171.639	1.36152	0.199009	1.81662	0.0692757	1	protein coding	heparanase	7.68274	9.39169	8.07361	8.42061	4.36671	2.3903	4.52181	5.12834	4.76352	5.52791	4.60304	6.26848	354	345	259	278	124	53	100	95	108	126	111	170	333.018	318.644	232.529	274.858	110.786	58.7875	111.293	109.096	114.989	132.024	123.978	139.666
1	153181178	153182224	1	ENSMUSG00000079138	Gm8818	51.7418	1.36038	0.445759	0.808454	0.418829	1	processed pseudogene	predicted pseudogene 8818	13.9156	6.06074	4.04909	7.49423	4.03158	3.42009	4.32512	2.35141	9.48537	4.82126	2.87282	6.56275	186	69	38	71	34	22	28	14	65	32	21	54	180.095	61.3699	34.8191	73.0365	30.539	25.1142	31.7837	14.9351	68.3645	34.3798	22.807	43.6581
1	167050452	167112889	-1	ENSMUSG00000026558	Uck2	140.624	1.35906	0.251833	1.42579	0.153928	1	protein coding	uridine-cytidine kinase 2	6.74189	6.54184	9.60923	9.54011	2.3429	4.63864	3.10349	3.53155	5.95077	5.82844	5.53654	4.83933	243	285	249	188	87	50	71	64	105	149	78	142	250.686	190.397	237.409	267.125	50.9896	97.8633	65.5247	64.4458	123.225	119.411	127.92	92.4938
8	104828257	104871143	1	ENSMUSG00000031871	Cdh5	16.7755	1.35381	0.664003	0.532837	0.594147	1	protein coding	cadherin 5	0.592903	0.582682	0.74893	0.627922	0.524123	0.173315	0.137663	0.037236	1.38596	0.200371	0.210274	0.297217	36	30	32	27	20	5	4	1	19	6	7	11	32.3747	24.9037	27.172	25.8191	16.7507	5.36954	4.26819	0.997859	42.1453	6.02834	7.1344	8.34208
8	48552127	48606268	1	ENSMUSG00000031562	Dctd	15.3958	1.35148	0.467888	0.751215	0.452523	1	protein coding	dCMP deaminase	0.829449	2.22935	2.65098	1.82721	1.21159	0.632613	0.777952	0.460546	2.09138	1.12134	0.382569	1.3662	15	36	23	36	18	9	12	3	13	17	2	12	15.0677	31.6991	31.9981	24.9953	12.8822	6.52043	8.02446	4.10593	21.1576	11.2237	4.31834	12.7571
4	155949180	155953897	-1	ENSMUSG00000029073	Cptp	56.0613	1.35136	0.349149	1.00633	0.314259	1	protein coding	ceramide-1-phosphate transfer protein	3.84155	3.2978	2.42306	2.55029	0.687759	1.44284	2.9185	1.72371	2.08996	1.54594	1.29718	2.45877	151	110	67	71	17	27	55	30	42	30	28	59	145.489	97.7596	60.9744	72.7323	15.2454	31.0044	62.761	32.0382	44.0797	32.2596	30.5263	47.8654
6	145892802	145895671	1	ENSMUSG00000108200	Gm43931	10.0698	1.35055	0.646136	0.542533	0.587452	1	TEC	predicted gene, 43931	0.656536	0.331632	0.5666	0.463494	0.111876	0.197096	0.48927	0.158906	0.504548	0.66508	0.128141	0.076845	28	12	17	14	3	4	10	3	11	14	3	2	26.9728	10.6643	15.4669	14.3392	2.6902	4.59434	11.4135	3.20395	11.5437	15.055	3.27119	1.62278
2	126945729	126975874	-1	ENSMUSG00000034906	Ncaph	94.5823	1.3505	0.443569	0.790181	0.429422	1	protein coding	non-SMC condensin I complex, subunit H	4.26738	6.80691	8.18919	6.16615	0.906892	1.47021	3.35641	1.58745	5.86168	7.37336	2.75706	4.56015	170	224	226	171	21	27	12	28	113	139	55	108	137.934	172.216	175.878	150.085	17.1572	26.9633	61.6016	25.1821	105.514	131.316	55.3742	75.7651
13	38150581	38178193	-1	ENSMUSG00000021427	Ssr1	1472.26	1.35023	0.183103	1.91276	0.0557785	1	protein coding	signal sequence receptor, alpha	68.7476	62.7184	59.7031	61.4032	33.5976	26.348	27.5892	32.5148	38.8511	51.8434	37.8484	38.7702	2934	2295	2006	1936	1179	791	792	807	1049	1187	962	1221	3340.12	2385.12	1927.35	2246.51	955.414	726.327	761.113	775.294	1051.2	1387.84	1142.62	968.235
[truncated: 11,678 more rows]
